# Supplementary material for: Antagonistic regulation of mRNA expression and splicing by CELF and MBNL proteins
Source: Genome Res. 2015 Jun;25(6):858–71. doi: 10.1101/gr.184390.114 (PMC4448682; doi:10.1101/gr.184390.114)
Supplement: Supplemental Material [file supp_gr.184390.114_Table_S1.xlsx]

## Sheet: Sheet1
Table S1. Mice used for RNA-seq.
Experiment	Animal	Genotype	Treatment	Time point	Tissue collected	Body weight (g)	Heart weight (g)	Sample weight (g)	Notes
Celf1 induction in heart	A3252	MHCrtTA/TRECUGBP1	2 g/kg dox	12 hr	heart (ventricle, apex)	25.4	0.0984	0.0767	active, healthy
Celf1 induction in heart	A3258	MHCrtTA/TRECUGBP1	2 g/kg dox	12 hr	heart (ventricle, apex)	25.3	0.1051	0.0719	active, healthy
Celf1 induction in heart	A3276	MHCrtTA/TRECUGBP1	2 g/kg dox	12 hr	heart (ventricle, apex)	25.2	0.1154	0.0822	active, healthy
Celf1 induction in heart	A3254	MHCrtTA/TRECUGBP1	2 g/kg dox	24 hr	heart (ventricle, apex)	31.7	0.1298	0.0838	active, healthy
Celf1 induction in heart	A3262	MHCrtTA/TRECUGBP1	2 g/kg dox	24 hr	heart (ventricle, apex)	24.1	0.105	0.0744	active, healthy
Celf1 induction in heart	A3277	MHCrtTA/TRECUGBP1	2 g/kg dox	24 hr	heart (ventricle, apex)	26	0.1121	0.0723	active, healthy
Celf1 induction in heart	A3264	MHCrtTA/TRECUGBP1	2 g/kg dox	72 hr	heart (ventricle, apex)	23.5	0.0995	0.0709	active, healthy
Celf1 induction in heart	A3278	MHCrtTA/TRECUGBP1	2 g/kg dox	72 hr	heart (ventricle, apex)	25.4	0.1018	0.0649	active, healthy
Celf1 induction in heart	A3281	MHCrtTA/TRECUGBP1	2 g/kg dox	72 hr	heart (ventricle, apex)	35.6	0.1516	0.1066	active, healthy
Celf1 induction in heart	A3250	MHCrtTA	2 g/kg dox	72 hr	heart (ventricle, apex)	24	0.1072	0.0683	active, healthy
Celf1 induction in heart	A3259	MHCrtTA	2 g/kg dox	72 hr	heart (ventricle, apex)	25	0.1129	0.0728	active, healthy
Celf1 induction in heart	A3280	MHCrtTA	2 g/kg dox	72 hr	heart (ventricle, apex)	30.5	0.1408	0.0967	active, healthy
Celf1 induction in heart	A3345	MHCrtTA/TRECUGBP1	2 g/kg dox	7 day	heart (ventricle, apex)	28.5	0.1631	0.1119	ruffled fur, slow moving
Celf1 induction in heart	A3269	MHCrtTA/TRECUGBP1	2 g/kg dox	7 day	heart (ventricle, apex)	19.7	0.1298	0.08	ruffled fur, slow moving
Celf1 induction in heart	A3283	MHCrtTA/TRECUGBP1	2 g/kg dox	7 day	heart (ventricle, apex)	25.5	0.1539	0.1008	ruffled fur, slow moving
Experiment	Animal	Genotype	Treatment	Time point	Tissue collected	Body weight (g)	Heart weight (g)	Sample weight (g)	Notes
Celf2 induction in heart	A6740	MHCrtTA/TRECUGBP2	6 g/kg dox	12 hr	heart (ventricle, apex)	22.1	0.0927	0.0627	active, healthy
Celf2 induction in heart	A6741	MHCrtTA/TRECUGBP2	6 g/kg dox	12 hr	heart (ventricle, apex)	21.7	0.0954	0.0584	active, healthy
Celf2 induction in heart	A6742	MHCrtTA/TRECUGBP2	6 g/kg dox	12 hr	heart (ventricle, apex)	23.8	0.1104	0.0702	active, healthy
Celf2 induction in heart	A6744	MHCrtTA/TRECUGBP2	6 g/kg dox	24 hr	heart (ventricle, apex)	21.5	0.0977	0.0589	active, healthy
Celf2 induction in heart	A6748	MHCrtTA/TRECUGBP2	6 g/kg dox	24 hr	heart (ventricle, apex)	27.8	0.1138	0.0729	active, healthy
Celf2 induction in heart	A6749	MHCrtTA/TRECUGBP2	6 g/kg dox	24 hr	heart (ventricle, apex)	28	0.1251	0.0801	active, healthy
Celf2 induction in heart	A6750	MHCrtTA/TRECUGBP2	6 g/kg dox	72 hr	heart (ventricle, apex)	24.7	0.1144	0.0707	active, healthy
Celf2 induction in heart	A6834	MHCrtTA/TRECUGBP2	6 g/kg dox	72 hr	heart (ventricle, apex)	24.9	0.1103	0.0725	active, healthy
Celf2 induction in heart	A6835	MHCrtTA/TRECUGBP2	6 g/kg dox	72 hr	heart (ventricle, apex)	28.3	0.1241	0.0943	active, healthy
Celf2 induction in heart	A6747	MHCrtTA	6 g/kg dox	72 hr	heart (ventricle, apex)	28.2	0.1177	0.0895	active, healthy
Celf2 induction in heart	A6743	MHCrtTA	6 g/kg dox	72 hr	heart (ventricle, apex)	21	0.1032	0.0608	active, healthy
Celf2 induction in heart	A6897	MHCrtTA	6 g/kg dox	72 hr	heart (ventricle, apex)	19.6	0.084	0.0546	active, healthy
Celf2 induction in heart	A6836	MHCrtTA/TRECUGBP2	6 g/kg dox	7 day	heart (ventricle, apex)	28.4	0.1306	0.0843	active, healthy
Celf2 induction in heart	A6837	MHCrtTA/TRECUGBP2	6 g/kg dox	7 day	heart (ventricle, apex)	27.9	0.1386	0.0909	active, healthy
Celf2 induction in heart	A6838	MHCrtTA/TRECUGBP2	6 g/kg dox	7 day	heart (ventricle, apex)	27	0.1291	0.0874	active, healthy
Experiment	Animal	Genotype	Treatment	Time point	Initial body weight (g)	Left gastroc weight (g)	Right gastroc weight (g)	Left tibia length (cm)	Right tibia length (cm)	Notes
Celf1 induction in muscle	A4331	MDAFrtTA/TRECUGBP1	2 g/kg dox	12 hr	22.8	0.1168	0.1165	2.4	2.3	active, healthy
Celf1 induction in muscle	A4346	MDAFrtTA/TRECUGBP1	2 g/kg dox	12 hr	22.5	0.1153	0.1321	2.4	2.4	active, healthy
Celf1 induction in muscle	A4403	MDAFrtTA/TRECUGBP1	2 g/kg dox	12 hr	21.1	0.109	0.117	2.3	2.3	active, healthy
Celf1 induction in muscle	A4349	MDAFrtTA/TRECUGBP1	2 g/kg dox	24 hr	21.7	0.1108	0.1177	2.3	2.3	active, healthy
Celf1 induction in muscle	A4404	MDAFrtTA/TRECUGBP1	2 g/kg dox	24 hr	19.3	0.1093	0.1067	2.3	2.3	active, healthy
Celf1 induction in muscle	A4414	MDAFrtTA/TRECUGBP1	2 g/kg dox	24 hr	28.9	0.1127	0.1258	2.4	2.4	active, healthy
Celf1 induction in muscle	A4372	MDAFrtTA/TRECUGBP1	2 g/kg dox	72 hr	21.7	0.1112	0.1177	2.3	2.3	active, healthy
Celf1 induction in muscle	A4408	MDAFrtTA/TRECUGBP1	2 g/kg dox	72 hr	19.3	0.1057	0.1103	2.3	2.3	active, healthy
Celf1 induction in muscle	A3561	MDAFrtTA/TRECUGBP1	2 g/kg dox	72 hr	29.2	0.1469	0.1579	2.4	2.4	active, healthy
Celf1 induction in muscle	A4374	MDAFrtTA	2 g/kg dox	72 hr	21.4	0.1044	0.0994	2.3	2.3	active, healthy
Celf1 induction in muscle	A3559	MDAFrtTA	2 g/kg dox	72 hr	32.5	0.1595	0.1968	2.4	2.4	active, healthy
Celf1 induction in muscle	A4393	MDAFrtTA	2 g/kg dox	72 hr	26.6	0.1391	0.1456	2.4	2.4	active, healthy
Celf1 induction in muscle	A4380	MDAFrtTA/TRECUGBP1	2 g/kg dox	7 day	22	0.1324	0.1251	2.4	2.4	active, healthy
Celf1 induction in muscle	A4411	MDAFrtTA/TRECUGBP1	2 g/kg dox	7 day	20.5	0.1095	0.1101	2.2	2.2	active, healthy
Celf1 induction in muscle	A4387	MDAFrtTA/TRECUGBP1	2 g/kg dox	7 day	23.7	0.1401	0.1397	2.3	2.3	active, healthy
