# Supplementary material for: Antagonistic regulation of mRNA expression and splicing by CELF and MBNL proteins
Source: Genome Res. 2015 Jun;25(6):858–71. doi: 10.1101/gr.184390.114 (PMC4448682; doi:10.1101/gr.184390.114)
Supplement: Supplemental Material [file supp_gr.184390.114_Table_S2fullsize.xlsx]

## Sheet: CELF1 heart
CELF1 induction in heart
#Event	Gene	Symbol	Description	delta	shuffled_delta_mean	shuffled_delta_sd	ctl_psi	7d_psi	delta_psi	MZ	Celf1heart_ctl_091121_A3250_low	Celf1heart_ctl_091121_A3250_mean	Celf1heart_ctl_091121_A3250_high	Celf1heart_ctl_091121_A3259_low	Celf1heart_ctl_091121_A3259_mean	Celf1heart_ctl_091121_A3259_high	Celf1heart_ctl_091121_A3280_low	Celf1heart_ctl_091121_A3280_mean	Celf1heart_ctl_091121_A3280_high	Celf1heart_12h_091210_A3258_low	Celf1heart_12h_091210_A3258_mean	Celf1heart_12h_091210_A3258_high	Celf1heart_12h_091228_A3252_low	Celf1heart_12h_091228_A3252_mean	Celf1heart_12h_091228_A3252_high	Celf1heart_12h_100122_A3276_low	Celf1heart_12h_100122_A3276_mean	Celf1heart_12h_100122_A3276_high	Celf1heart_24h_100309_A3254_low	Celf1heart_24h_100309_A3254_mean	Celf1heart_24h_100309_A3254_high	Celf1heart_24h_100309_A3277_low	Celf1heart_24h_100309_A3277_mean	Celf1heart_24h_100309_A3277_high	Celf1heart_24h_100421_A3262_low	Celf1heart_24h_100421_A3262_mean	Celf1heart_24h_100421_A3262_high	Celf1heart_24h_100510_A3262_low	Celf1heart_24h_100510_A3262_mean	Celf1heart_24h_100510_A3262_high	Celf1heart_72h_091121_A3278_low	Celf1heart_72h_091121_A3278_mean	Celf1heart_72h_091121_A3278_high	Celf1heart_72h_100115_A3264_low	Celf1heart_72h_100115_A3264_mean	Celf1heart_72h_100115_A3264_high	Celf1heart_72h_100115_A3281_low	Celf1heart_72h_100115_A3281_mean	Celf1heart_72h_100115_A3281_high
chr10:80065614:80065694:+@chr10:80065984:80066058:+@chr10:80071548:80071595:+	ENSMUSG00000078441	Scamp4	secretory carrier membrane protein 4, complete cds.,Mus musculus secretory carrier membrane protein 4 mRNA	24	2.20202	12.4932	0.17	0.37	0.21	1.74479	0.02	0.13	0.34	0.03	0.14	0.32	0.07	0.23	0.5	0.03	0.14	0.33	0.07	0.27	0.66	0.01	0.18	0.55	0.14	0.36	0.73	0	0.03	0.11	0.01	0.06	0.15	0.01	0.04	0.13	0.01	0.09	0.26	0.03	0.23	0.67	0.04	0.48	0.95
chr11:78784819:78784929:-@chr11:78781500:78781535:-@chr11:78780946:78780996:-	ENSMUSG00000001123	Lgals9	galactose binding,lectin	n/a	n/a	n/a	n/a	n/a	n/a	n/a	0.72	0.89	0.99	0.64	0.9	0.99	0.77	0.93	1	0.74	0.9	0.99	0.61	0.86	0.99	0.71	0.9	0.99	0.76	0.92	0.98	0.54	0.81	0.98	0.39	0.7	0.95	0.55	0.81	0.98	0.78	0.92	0.99	0.73	0.9	0.98	0.39	0.74	0.96
chr18:24629322:24629585:+@chr18:24631451:24631650:+@chr18:24634026:24634225:+	ENSMUSG00000024273	2700062C07Rik	hypothetical protein LOC68046	-7	0.262626	5.7059	0.74	0.76	0.02	-1.27283	0.27	0.62	0.94	0.5	0.81	0.98	0.5	0.8	0.96	0.43	0.79	0.98	0.42	0.8	0.99	0.75	0.9	0.98	0.76	0.91	0.98	0.41	0.71	0.97	0.78	0.93	1	0.76	0.93	1	0.64	0.89	0.99	0.58	0.82	0.96	0.59	0.83	0.99
chr19:4041398:4041528:-@chr19:4036791|4036862:4036688:-	ENSMUSG00000060803	Gstp1	glutathione S-transferase	6	-0.171717	3.62383	0.01	0.03	0.01	1.70309	0	0.01	0.03	0.01	0.02	0.04	0	0.01	0.02	0.01	0.02	0.04	0	0.01	0.03	0	0.01	0.03	0	0.01	0.02	0	0.01	0.02	0.01	0.02	0.04	0	0.01	0.03	0.02	0.04	0.08	0.01	0.03	0.06	0	0.01	0.03
chr8:86560172:86559984|86559740:-@chr8:86558091:86558192:-	ENSMUSG00000005465	Il27ra	interleukin 27 receptor	n/a	n/a	n/a	n/a	n/a	n/a	n/a	n/a	n/a	n/a	n/a	n/a	n/a	n/a	n/a	n/a	n/a	n/a	n/a	n/a	n/a	n/a	n/a	n/a	n/a	0	0.07	0.31	0	0.08	0.33	0.01	0.13	0.48	0	0.14	0.47	n/a	n/a	n/a	n/a	n/a	n/a	n/a	n/a	n/a
chr7:52115093:52115315:+@chr7:52115447:52115554:+@chr7:52115730:52115801:+	ENSMUSG00000002963	Pnkp	polynucleotide kinase 3'- phosphatase	-1	0.010101	0.937382	0.92	0.9	-0.03	-1.07758	0.81	0.94	1	0.72	0.91	0.99	0.79	0.92	0.98	0.89	0.97	1	0.67	0.85	0.97	0.82	0.93	0.99	0.89	0.97	1	0.85	0.94	1	0.81	0.92	0.99	0.78	0.92	0.98	0.64	0.82	0.94	0.84	0.95	1	0.82	0.93	0.99
chr5:23675114:23675208:+@chr5:23681272:23681348:+@chr5:23683818:23683904:+	ENSMUSG00000048439	NLP-1	Mus musculus NLP-1 mRNA for nucleoporin-like protein-1 isoformT	1	1.05051	6.35383	0.64	0.81	0.17	-0.00794875	0.36	0.72	0.95	0.19	0.6	1	0.23	0.6	0.94	0.32	0.76	0.97	0.11	0.55	0.87	0.08	0.41	0.9	0.58	0.81	0.97	0.31	0.63	0.94	0.58	0.85	0.97	0.31	0.63	0.85	0.17	0.54	0.93	0.45	0.76	0.96	0.44	0.79	0.99
chr10:52010657:52010729:+@chr10:52024393:52024526:+@chr10:52031206:52031246:+	ENSMUSG00000019891	Dcbld1	CUB and LCCL domain containing 1, clone:4631413K11 product:hypothetical LCCL domain/CUB domain containing protein, RIKEN full-length enriched library,Mus musculus 0 day neonate skin cDNA, full insert sequence.,discoidin	-14	-3.09091	12.2821	0.71	0.51	-0.21	-0.88821	0.39	0.7	0.98	0.41	0.73	0.97	0.4	0.71	0.94	0.35	0.79	1	0.17	0.7	0.98	0.75	0.92	0.99	0.41	0.76	0.99	0.02	0.13	0.37	0.42	0.73	0.95	0.39	0.77	0.97	0.29	0.65	0.95	0.43	0.78	0.99	0.12	0.47	0.92
chr14:17245433:17245633:+@chr14:17246075:17246270:+@chr14:17249071:17249226:+	ENSMUSG00000017485	Top2b	topoisomerase (DNA) II beta	-1	-0.0505051	0.868922	0.81	0.9	0.09	-1.09273	0.52	0.76	0.95	0.56	0.81	0.98	0.58	0.85	0.98	0.63	0.81	0.96	0.41	0.68	0.93	0.81	0.93	0.99	0.9	0.97	1	0.93	0.98	1	0.7	0.85	0.97	0.7	0.89	1	0.44	0.7	0.91	0.86	0.96	1	0.62	0.8	0.95
chr2:164895129:164895215:+@chr2:164895322:164895348:+	n/a	n/a	n/a	n/a	n/a	n/a	n/a	n/a	n/a	n/a	n/a	n/a	n/a	n/a	n/a	n/a	n/a	n/a	n/a	n/a	n/a	n/a	n/a	n/a	n/a	n/a	n/a	n/a	n/a	n/a	n/a	n/a	n/a	n/a	n/a	n/a	n/a	n/a	n/a	n/a	n/a	n/a	n/a	n/a	n/a	n/a	n/a	n/a	n/a
chr10:126896523:126896631:+@chr10:126899244:126899339:+@chr10:126902038:126902069:+	ENSMUSG00000025404	R3hdm2	R3H domain containing 2	-7	-0.515152	12.3757	0.78	0.76	-0.02	-0.523997	0.69	0.84	0.94	0.63	0.72	0.82	0.67	0.78	0.88	0.62	0.76	0.88	0.75	0.86	0.94	0.88	0.97	1	0.78	0.84	0.9	0.87	0.93	0.97	0.86	0.93	0.98	0.81	0.87	0.93	0.7	0.84	0.95	0.73	0.82	0.9	0.8	0.9	0.98
chr14:55272517:55272539:-@chr14:55272051:55272115:-@chr14:55268369:55270695:-	n/a	n/a	n/a	16	-0.474747	10.4846	0.33	0.51	0.18	1.57133	0.01	0.11	0.35	0.3	0.67	0.97	0.02	0.21	0.63	0.14	0.52	0.92	0.18	0.5	0.89	0.06	0.27	0.65	0.19	0.47	0.75	0.16	0.33	0.6	0.4	0.72	0.95	0.48	0.71	0.93	0.16	0.35	0.63	0.4	0.73	0.97	0.67	0.87	0.98
chr10:62113773:62113977:-@chr10:62110282:62110391:-@chr10:62108739:62109949:-	n/a	n/a	n/a	61	1.32323	21.4588	0.37	0.85	0.48	2.78099	0.22	0.42	0.67	0.17	0.34	0.56	0.16	0.34	0.59	0.31	0.5	0.73	0.11	0.31	0.62	0.38	0.6	0.78	0.29	0.44	0.61	0.26	0.41	0.57	0.32	0.47	0.62	0.33	0.48	0.64	0.16	0.31	0.51	0.13	0.4	0.72	0.19	0.41	0.67
chr11:86922703:86922806:+@chr11:86926839:86926883:+@chr11:86929606:86929692:+	ENSMUSG00000020492	1110001A07Rik	clone:1110001A07 product:hypothetical protein, RIKEN full-length enriched library, full insert sequence.,Mus musculus 18-day embryo whole body cDNA,hypothetical protein LOC66140	n/a	n/a	n/a	n/a	n/a	n/a	n/a	0	0.26	0.68	0.01	0.22	0.73	n/a	n/a	n/a	0.03	0.24	0.72	0.09	0.49	0.86	0.01	0.12	0.45	0.03	0.21	0.49	0.01	0.1	0.34	0.02	0.19	0.51	0	0.02	0.08	0.02	0.26	0.69	0.02	0.13	0.38	0	0.21	0.6
chr3:129534036:129534301:-@chr3:129533513:129533771:-@chr3:129532238:129532409:-	ENSMUSG00000028010	Nola1	nucleolar protein family A	-9	0.666667	6.91069	0.92	0.77	-0.15	-1.3988	0.79	0.92	0.98	0.76	0.93	1	0.77	0.92	0.99	0.46	0.68	0.88	0.59	0.84	0.97	0.42	0.7	0.92	0.83	0.96	1	0.92	0.98	1	0.42	0.7	0.96	0.81	0.93	0.99	0.89	0.96	1	0.69	0.89	0.99	0.54	0.83	1
chr10:80326200:80326296:+@chr10:80326783|80326817:80326899:+	ENSMUSG00000035206	Sppl2b,3110056O03Rik	RIKEN full-length enriched library,signal peptide peptidase-like 2B,Mus musculus 10 days neonate medulla oblongata cDNA,Signal peptide peptidase-like 2B (EC 3.4.23.-) (Protein SPP-like 2B) (Protein SPPL2b)., full insert sequence., clone:B830011P16 product:hypothetical Protease associated (PA) domain containing protein	n/a	n/a	n/a	n/a	n/a	n/a	n/a	0.51	0.83	0.99	0.74	0.9	0.99	0.6	0.85	0.99	0.7	0.91	0.99	0.63	0.88	1	0.93	0.98	1	0.71	0.91	0.99	0.6	0.87	0.99	0.07	0.47	0.97	0.6	0.83	0.97	0.73	0.92	1	0.54	0.81	0.99	n/a	n/a	n/a
chr16:97677829:97677966:-@chr16:97677096:97677250:-@chr16:97676697:97676835:-	n/a	na/a	n/a	n/a	n/a	n/a	n/a	n/a	n/a	n/a	n/a	n/a	n/a	n/a	n/a	n/a	n/a	n/a	n/a	n/a	n/a	n/a	n/a	n/a	n/a	n/a	n/a	n/a	n/a	n/a	n/a	n/a	n/a	n/a	n/a	n/a	n/a	n/a	n/a	n/a	n/a	n/a	n/a	n/a	n/a	n/a	n/a	n/a	n/a
chr1:173209254:173209444:-@chr1:173208266:173208326:-	n/a	n/a	n/a	28	-1.06061	13.3959	0.33	0.64	0.31	2.16936	0.29	0.44	0.62	0.15	0.25	0.37	0.19	0.3	0.48	0.35	0.5	0.66	0.3	0.53	0.84	0.3	0.45	0.63	0.21	0.31	0.45	0.21	0.31	0.45	0.14	0.21	0.3	0.19	0.27	0.39	0.16	0.25	0.36	0.08	0.14	0.21	0.17	0.29	0.47
chr1:173259276:173259657:+@chr1:173261384:173261416:+@chr1:173268383:173268771:+	ENSMUSG00000013973	Dedd	death effector domain-containing	1	0.171717	0.888085	0.51	0.53	0.02	0.932662	0.28	0.57	0.81	0.09	0.34	0.66	0.32	0.63	0.93	0.02	0.24	0.71	0.08	0.31	0.63	0.17	0.46	0.82	0.19	0.4	0.65	0.28	0.49	0.76	0.17	0.34	0.54	0.33	0.55	0.8	0.09	0.27	0.53	0.29	0.62	0.93	0.07	0.35	0.78
chr9:103130398:103130226|103130222:-@chr9:103129168:103129276:-	ENSMUSG00000032554	n/a	transferrin	n/a	n/a	n/a	n/a	n/a	n/a	n/a	0.05	0.29	0.69	0.03	0.19	0.45	0.03	0.22	0.55	0.04	0.41	0.92	0.01	0.25	0.72	0	0.32	0.74	0.03	0.21	0.52	0	0.17	0.51	0.04	0.39	0.87	0.01	0.21	0.53	0.03	0.36	0.9	0.02	0.5	0.89	0.05	0.53	0.94
chr3:90310030:90311548:-@chr3:90307201|90307204:90307018:-	ENSMUSG00000001017	2500003M10Rik	Uncharacterized protein C1orf77 homolog.	6	0.171717	3.32739	0.37	0.59	0.23	1.75161	0.11	0.32	0.56	0.07	0.23	0.43	0.31	0.55	0.77	0.14	0.52	0.84	0.12	0.44	0.8	0.28	0.49	0.72	0.21	0.41	0.63	0.08	0.38	0.71	0.36	0.72	0.95	0.19	0.53	0.83	0.27	0.46	0.67	0.28	0.72	0.95	0.32	0.61	0.89
chr12:31589934:31590007:-@chr12:31589735:31589848:-@chr12:31589583:31589696:-@chr12:31582610:31582671:-	ENSMUSG00000044573	Acp1	full insert sequence) (In vitro fertilized eggs cDNA, full insert sequence) (Bone marrow macrophage cDNA, RIKEN full-length enriched library, clone:7420463D22 product:acid phosphatase 1,Acp1 protein (NOD-derived CD11c +ve dendritic cells cDNA, clone:I830071K18 product:acid phosphatase 1, RIKEN full- length enriched library, clone:F630041K20 product:acid phosphatase 1, soluble	-11	-1.34343	18.055	0.55	0.44	-0.11	-0.534842	0.46	0.56	0.66	0.39	0.48	0.57	0.49	0.62	0.74	0.33	0.42	0.53	0.43	0.58	0.73	0.53	0.63	0.73	0.45	0.53	0.62	0.52	0.61	0.69	0.41	0.51	0.61	0.31	0.39	0.47	0.66	0.77	0.86	0.52	0.66	0.79	0.56	0.69	0.82
chr12:76770459:76770524:-@chr12:76741791:76742003:-@chr12:76731583:76734495:-	ENSMUSG00000045690	2600001A11Rik	RIKEN full-length enriched library, clone:2600001A11 product:hypothetical Trp-Asp (WD) repeats profile/Trp-Asp (WD) repeats circular profile/G-protein beta WD-40 repeats containing protein,10 days embryo whole body cDNA	n/a	n/a	n/a	n/a	n/a	n/a	n/a	0	0.02	0.07	0	0.03	0.08	0	0.02	0.08	0	0.01	0.04	0	0.02	0.09	0	0.01	0.03	0	0.02	0.06	0	0.01	0.04	0	0.02	0.06	0	0.01	0.04	0	0.02	0.06	0	0.02	0.05	0	0.02	0.06
chr16:8513522:8513667:+@chr16:8572929|8572934:8573043:+	ENSMUSG00000057880	Abat	clone:9630038C02 product:BETA-ALANINE OXOGLUTARATE AMINOTRANSFERASE (EC 2.6.1.19) homolog [Rattus norvegicus],Mus musculus 16 days neonate cerebellum cDNA, RIKEN full-length enriched library, full insert sequence.,4-aminobutyrate aminotransferase	n/a	n/a	n/a	n/a	n/a	n/a	n/a	0.38	0.78	0.99	0.04	0.46	0.96	0.31	0.69	0.98	0.41	0.77	0.98	0.05	0.47	0.94	0.35	0.74	1	0.21	0.76	0.98	0.65	0.87	0.98	0.68	0.88	0.99	0.51	0.82	0.98	0.18	0.61	0.91	0.06	0.47	0.88	0.09	0.43	0.92
chr4:125879814:125880005:-@chr4:125878766:125878872:-@chr4:125871220:125871648:-	n/a	n/a	n/a	n/a	n/a	n/a	n/a	n/a	n/a	n/a	0.07	0.33	0.77	0.06	0.35	0.82	0.02	0.21	0.76	0.03	0.37	0.92	0.03	0.35	0.91	0.01	0.42	0.96	0.05	0.34	0.83	0.01	0.26	0.78	0.02	0.37	0.99	0.01	0.09	0.27	0.01	0.16	0.59	0.1	0.32	0.61	0.08	0.4	0.88
chr16:98183579:98183787:-@chr16:98177923:98178065:-@chr16:98168359:98174258:-	ENSMUSG00000046962	Zfp295	zinc finger protein 295 isoform 3	-24	0.414141	12.9248	0.68	0.46	-0.22	-1.88894	0.43	0.73	0.96	0.3	0.7	0.96	0.32	0.62	0.9	0.05	0.3	0.72	0.64	0.86	0.99	0.46	0.79	0.96	0.61	0.86	0.99	0.67	0.87	0.99	0.71	0.87	0.97	0.52	0.72	0.88	0.47	0.69	0.9	0.54	0.79	0.94	0.55	0.79	0.99
chr11:101638407:101638460:-@chr11:101636755|101636758:101636632:-	ENSMUSG00000017724	Etv4	clone:G630092J20 product:ets variant gene 4 (E1A enhancer binding protein, RIKEN full-length enriched library,Visual cortex cDNA, E1AF), full insert sequence.,Mus musculus 21 days neonate cerebellum cDNA, clone:K230002O06 product:ets variant gene 4 (E1A enhancer binding protein, full insert sequence. (Fragment).,ets variant gene 4 (E1A enhancer binding	n/a	n/a	n/a	n/a	n/a	n/a	n/a	n/a	n/a	n/a	n/a	n/a	n/a	n/a	n/a	n/a	n/a	n/a	n/a	n/a	n/a	n/a	n/a	n/a	n/a	n/a	n/a	n/a	n/a	n/a	n/a	n/a	n/a	n/a	n/a	n/a	n/a	n/a	n/a	n/a	n/a	n/a	n/a	n/a	n/a	n/a
chr8:11530295:11530618:-@chr8:11529713|11529885:11529580:-	ENSMUSG00000056228	Cars2,AK049123	clone:2310051N18 product:hypothetical Cysteinyl-tRNA synthetase containing protein, RIKEN full-length enriched library, mitochondrial precursor (EC 6.1.1.16) (Cysteine--tRNA ligase) (CysRS).,Mus musculus adult male tongue cDNA, full insert sequence.,Probable cysteinyl-tRNA synthetase	n/a	n/a	n/a	n/a	n/a	n/a	n/a	0	0.03	0.08	0	0.02	0.07	0.01	0.05	0.12	0.01	0.04	0.11	0	0.02	0.11	0	0.03	0.1	0	0.02	0.06	0.01	0.05	0.12	0.02	0.12	0.29	0	0.02	0.07	0.06	0.13	0.22	0.02	0.07	0.16	0.17	0.4	0.73
chr12:114371396:114371548:+@chr12:114371752:114371787:+@chr12:114374008:114374643:+	ENSMUSG00000021144	Mta1	metastasis associated 1	n/a	n/a	n/a	n/a	n/a	n/a	n/a	0.91	0.97	1	0.85	0.95	0.99	0.89	0.96	1	0.9	0.97	1	0.89	0.96	1	0.89	0.96	1	0.9	0.97	1	0.89	0.97	1	0.54	0.84	0.99	0.68	0.86	0.99	0.93	0.97	1	0.89	0.97	1	0.76	0.92	0.99
chr11:58123030:58123674:+@chr11:58123758:58123835:+	n/a	n/a	n/a	-14	-1	13.469	0.56	0.25	-0.31	-0.965179	0.25	0.53	0.88	0.39	0.69	0.93	0.16	0.45	0.87	0.04	0.15	0.35	0.15	0.38	0.73	0.45	0.77	0.97	0.15	0.43	0.9	0.03	0.14	0.3	0.07	0.33	0.73	0.06	0.21	0.42	0.52	0.74	0.91	0.35	0.58	0.81	0.52	0.78	0.95
chr13:115615419:115615569|115615473:+@chr13:115616366:115616489:+	ENSMUSG00000015536	Mocs2	molybdopterin synthase,Molybdenum cofactor synthesis protein 2 large subunit (Molybdopterin synthase large subunit) (MPT synthase large subunit) (MOCS2B).	n/a	n/a	n/a	n/a	n/a	n/a	n/a	0.85	0.96	1	0.84	0.96	1	0.79	0.93	0.99	0.88	0.96	1	0.73	0.92	0.99	0.92	0.97	1	0.91	0.97	1	0.94	0.98	1	0.96	0.99	1	0.98	0.99	1	0.51	0.74	0.95	0.72	0.89	0.99	0.73	0.89	0.98
chr7:87373371:87373434:-@chr7:87373284:87373333:-	n/a	n/a	n/a	9	-0.646465	9.47012	0.94	0.91	-0.03	1.01862	0.82	0.93	0.99	0.84	0.96	1	0.75	0.92	1	0.84	0.95	1	0.1	0.33	0.72	0.84	0.95	0.99	0.52	0.81	1	0.35	0.71	0.99	0.55	0.85	0.99	0.41	0.7	0.96	0.75	0.92	0.99	0.69	0.89	1	0.58	0.86	0.99
chr4:45120785:45120986:-@chr4:45119487:45119665:-@chr4:45118080:45118516:-	ENSMUSG00000078713	n/a	n/a	n/a	n/a	n/a	n/a	n/a	n/a	n/a	0	0.01	0.02	0	0	0.01	0	0	0.01	0	0	0.01	0	0.02	0.04	0	0	0.01	0	0.01	0.01	0	0	0.01	0	0.01	0.02	0	0.01	0.02	0	0.01	0.02	0.01	0.02	0.03	0	0.02	0.04
chr9:69864626:69864730:+@chr9:69867196:69867322:+@chr9:69870244:69870673:+	ENSMUSG00000033543	Gtf2a2	2,Mus musculus 2 days neonate thymus thymic cells cDNA, clone:C920021J23 product:general transcription factor II A, RIKEN full-length enriched library	n/a	n/a	n/a	n/a	n/a	n/a	n/a	0.78	0.92	1	0.9	0.97	1	0.67	0.89	0.98	0.69	0.85	0.97	0.64	0.83	0.97	0.83	0.94	0.99	0.96	0.99	1	0.92	0.98	1	0.83	0.93	0.99	0.72	0.86	0.99	0.57	0.85	0.99	0.87	0.95	0.99	0.88	0.97	1
chr8:37568543:37568779:+@chr8:37571379:37571466:+@chr8:37573242:37573378:+@chr8:37574627:37579624:+	n/a	n/a	n/a	n/a	n/a	n/a	n/a	n/a	n/a	n/a	0.01	0.36	0.97	0.17	0.51	0.96	0.07	0.55	0.98	0.19	0.63	0.97	0.02	0.5	1	0.03	0.45	0.87	0.09	0.69	0.99	0.07	0.46	0.84	0.25	0.72	1	0.07	0.46	0.82	0.01	0.35	0.87	0.12	0.6	0.97	0.07	0.43	0.93
chr4:46511915:46512018|46512014:+@chr4:46512938:46513117:+	ENSMUSG00000028334	Nans	complete cds.,N-acetylneuraminic acid synthase (sialic acid,Mus musculus mRNA for N-acetylneuraminic acid 9-phosphate synthetase	n/a	n/a	n/a	n/a	n/a	n/a	n/a	0	0.09	0.29	0.03	0.37	0.84	0	0.16	0.41	0.01	0.08	0.23	0.02	0.32	0.71	0.05	0.22	0.53	0.02	0.14	0.41	0.01	0.14	0.39	0.03	0.23	0.49	0	0.12	0.34	0.02	0.2	0.53	0.04	0.41	0.79	0.02	0.16	0.47
chr10:74979899:74980604:-@chr10:74974666:74974901:-@chr10:74973866:74974031:-	ENSMUSG00000033416	1110038D17Rik	Mus musculus adult male diencephalon cDNA, RIKEN full-length enriched library, clone:9330209J05 product:CDNA FLJ30119 FIS,hypothetical protein LOC68778, full insert sequence., CLONE BRACE1000070 homolog [Homo sapiens]	n/a	n/a	n/a	n/a	n/a	n/a	n/a	0.5	0.8	0.98	0.6	0.84	0.98	0.51	0.8	0.98	0.24	0.65	0.96	0.23	0.58	0.97	0.41	0.69	0.91	0.53	0.79	0.97	0.47	0.79	0.98	0.38	0.65	0.99	0.54	0.79	0.96	0.36	0.62	0.91	0.45	0.76	0.98	0.45	0.78	0.99
chr18:34769459:34769603:-@chr18:34768072:34768281:-@chr18:34767429:34767709:-	ENSMUSG00000003778	Brd8	clone:2610007E11 product:unclassifiable,Mus musculus 10 days embryo whole body cDNA, full insert sequence.,bromodomain containing 8, RIKEN full-length enriched library	-24	-0.464646	12.975	0.93	0.79	-0.14	-1.8139	0.83	0.94	0.99	0.78	0.92	0.99	0.82	0.94	1	0.84	0.94	0.99	0.72	0.9	0.99	0.4	0.64	0.91	0.44	0.62	0.79	0.62	0.79	0.94	0.36	0.53	0.72	0.44	0.59	0.79	0.58	0.78	0.96	0.27	0.49	0.74	0.4	0.61	0.84
chr2:73701226:73701295:-@chr2:73691852:73691948:-@chr2:73688921:73689039:-	ENSMUSG00000027104	Atf2	Adult male urinary bladder cDNA, full insert sequence., clone:9530046I22 product:activating transcription factor 2,activating transcription factor 2 isoform 1, RIKEN full-length enriched library	11	1.23232	8.706	0.51	0.41	-0.1	1.12195	0.25	0.47	0.74	0.25	0.48	0.78	0.3	0.57	0.94	0.23	0.43	0.66	0.13	0.59	0.98	0.13	0.27	0.48	0.32	0.48	0.67	0.3	0.46	0.65	0.16	0.32	0.5	0.22	0.35	0.51	0.23	0.42	0.64	0.17	0.31	0.49	0.16	0.34	0.62
chr11:59554351:59554763:+@chr11:59555493:59555600:+@chr11:59557273:59557329:+	ENSMUSG00000005417	AA536749	Rho interacting protein 3 isoform 2,Rho interacting protein 3 isoform 1	21	2.22222	8.54762	0.89	0.98	0.08	2.19684	0.77	0.86	0.93	0.78	0.89	0.96	0.85	0.93	0.98	0.81	0.88	0.94	0.73	0.84	0.92	0.87	0.94	0.98	0.88	0.93	0.96	0.81	0.88	0.94	0.94	0.98	0.99	0.92	0.96	0.99	0.82	0.88	0.94	0.8	0.89	0.95	0.71	0.85	0.96
chr4:28865746:28865929|28865914:+@chr4:28869736:28869844:+	n/a	na/a	n/a	n/a	n/a	n/a	n/a	n/a	n/a	n/a	n/a	n/a	n/a	n/a	n/a	n/a	n/a	n/a	n/a	0.21	0.65	0.94	n/a	n/a	n/a	n/a	n/a	n/a	n/a	n/a	n/a	n/a	n/a	n/a	n/a	n/a	n/a	n/a	n/a	n/a	n/a	n/a	n/a	n/a	n/a	n/a	n/a	n/a	n/a
chr17:15120072:15121879:+@chr17:15122738:15122874:+@chr17:15123682:15123796:+	ENSMUSG00000036552	9030025P20Rik	RIKEN full-length enriched library, 11 days embryo whole body cDNA,hypothetical protein LOC381062 isoform 1,Mus musculus 10, full insert sequence., clone:2210410C16 product:hypothetical protein, clone:2810481G13 product:t-complex-associated testis expressed 3,Adult male stomach cDNA	n/a	n/a	n/a	n/a	n/a	n/a	n/a	0.95	0.98	1	0.93	0.98	1	0.91	0.98	1	0.84	0.95	1	0.8	0.92	0.98	0.93	0.98	1	0.89	0.97	0.99	0.95	0.99	1	0.78	0.92	0.99	0.81	0.94	0.99	0.9	0.98	1	0.81	0.95	1	0.84	0.95	1
chr7:74762879:74763016:-@chr7:74704744:74704950:-@chr7:74690252:74690354:-	ENSMUSG00000030556	Lrrc28	leucine rich repeat containing 28, containing protein, RIKEN full-length enriched library,Adult male tongue cDNA,Mus musculus adult male liver cDNA, clone:1300004K21 product:RIKEN cDNA 2210012C09 gene, full insert sequence., clone:2310058O11 product:Leucine-rich repeat/Leucine-rich repeat	6	0.121212	13.162	0.45	0.52	0.07	0.446649	0.33	0.57	0.81	0.19	0.34	0.59	0.24	0.44	0.7	0.27	0.47	0.75	0.01	0.11	0.41	0.24	0.58	0.93	0.26	0.48	0.73	0.39	0.58	0.77	0.25	0.52	0.88	0.32	0.72	1	0.68	0.84	0.96	0.53	0.75	0.96	0.39	0.61	0.9
chr7:129211178:129211507:+@chr7:129212295:129212503:+	n/a	n/a	n/a	1	0.030303	0.892783	0.01	0.01	0.01	1.08615	0	0.01	0.02	0	0	0.02	0	0.01	0.03	0	0.01	0.02	0.01	0.02	0.05	0	0.01	0.03	0	0.01	0.01	0	0	0.01	0	0.01	0.01	0	0	0.01	0	0	0	0	0.01	0.01	0	0.01	0.02
chr6:141860332:141860449:-@chr6:141859229:141859318:-@chr6:141855802:141857651:-	ENSMUSG00000041698	Slco1a1	solute carrier organic anion transporter family	n/a	n/a	n/a	n/a	n/a	n/a	n/a	n/a	n/a	n/a	n/a	n/a	n/a	n/a	n/a	n/a	n/a	n/a	n/a	n/a	n/a	n/a	n/a	n/a	n/a	0.06	0.44	0.86	n/a	n/a	n/a	0.04	0.44	0.93	0.06	0.36	0.81	n/a	n/a	n/a	n/a	n/a	n/a	n/a	n/a	n/a
chr2:164612198:164612355|164612348:+@chr2:164617213:164619724:+	ENSMUSG00000050373	Snx21,5730407K14Rik	clone:D030016M23 product:Sorting nexin 21 homolog [Homo sapiens], RIKEN full-length enriched library,sorting nexin family member 21,Mus musculus 9 days embryo whole body cDNA, full insert sequence.,5730407K14Rik protein.	1	0.0808081	0.928524	0.92	0.87	-0.05	0.989949	0.73	0.91	0.99	0.72	0.94	1	0.75	0.91	1	0.12	0.58	0.9	0.08	0.45	0.83	0.73	0.93	1	0.76	0.92	0.99	0.8	0.94	0.99	0.72	0.93	1	0.74	0.93	0.99	0.77	0.93	0.99	0.77	0.92	0.99	0.56	0.86	0.97
chr15:98430720:98430609|98430603:-@chr15:98430331:98430458:-	ENSMUSG00000022994	Adcy6	adenylate cyclase 6	11	0.646465	7.50665	0.1	0.26	0.16	1.37925	0.01	0.07	0.16	0.04	0.13	0.24	0.01	0.09	0.21	0.01	0.06	0.19	0.02	0.12	0.3	0.04	0.13	0.3	0.04	0.11	0.2	0.04	0.13	0.27	0.05	0.14	0.27	0.05	0.14	0.28	0.01	0.07	0.19	0.02	0.14	0.34	0.04	0.24	0.52
chr7:20283537:20283752:-@chr7:20282963|20282996:20282828:-	ENSMUSG00000002985	Apoe	RIKEN full-length enriched library,apolipoprotein E, full insert sequence. (Fragment)., clone:7120484D01 product:apolipoprotein E,2 days neonate sympathetic ganglion cDNA	n/a	n/a	n/a	n/a	n/a	n/a	n/a	0.98	0.99	1	0.98	0.99	1	0.99	1	1	0.99	1	1	0.96	0.99	1	0.99	1	1	0.99	1	1	1	1	1	1	1	1	1	1	1	0.99	1	1	0.97	0.99	1	0.96	0.99	1
chr17:35516765:35517118:+@chr17:35517306:35517581:+@chr17:35562516:35562579:+@chr17:35564809:35565093:+	ENSMUSG00000035929	H2-Q1	clone:A130027C03 product:histocompatibility 2, Q region locus 4,16 days neonate thymus cDNA, RIKEN full-length enriched library	8	1.39394	15.8852	0.99	0.98	-0.01	0.415862	0.94	0.97	0.99	0.98	1	1	0.98	0.99	1	0.93	0.97	0.99	0.75	0.86	0.97	0.97	0.99	1	0.92	0.95	0.97	0.84	0.86	0.88	0.4	0.45	0.51	0.97	0.99	1	0.95	0.97	0.98	0.95	0.98	0.99	0.98	0.99	1
chr6:117813092:117813160:+@chr6:117819236:117819291:+@chr6:117820274:117823309:+	ENSMUSG00000042097	Zfp239	zinc finger protein 239	n/a	n/a	n/a	n/a	n/a	n/a	n/a	n/a	n/a	n/a	n/a	n/a	n/a	n/a	n/a	n/a	n/a	n/a	n/a	n/a	n/a	n/a	0.01	0.37	0.86	0.1	0.55	0.98	0.14	0.56	0.97	0.03	0.56	0.94	0.07	0.46	0.9	n/a	n/a	n/a	n/a	n/a	n/a	n/a	n/a	n/a
chr6:88789757:88789765:-@chr6:88789621:88789714:-	n/a	n/a	n/a	n/a	n/a	n/a	n/a	n/a	n/a	n/a	0.41	0.68	0.94	0.25	0.55	0.88	0.32	0.65	0.93	0.25	0.56	0.92	0.74	0.9	0.99	0.37	0.74	0.99	0.61	0.85	0.99	0.76	0.93	1	0.05	0.24	0.57	0.57	0.77	0.94	0.4	0.7	0.94	0.6	0.86	0.99	0.48	0.76	0.97
chrX:130800800:130800854:-@chrX:130798266:130798400:-@chrX:130797021:130797423:-	ENSMUSG00000067369	4732479N06Rik	10 days neonate cerebellum cDNA, clone:B930004C15 product:hypothetical protein, RIKEN full-length enriched library	n/a	n/a	n/a	n/a	n/a	n/a	n/a	0.86	0.95	0.99	0.8	0.91	0.98	0.77	0.89	0.97	0.87	0.95	0.99	0.9	0.96	0.99	0.93	0.98	1	0.85	0.93	0.98	0.94	0.98	1	0.82	0.94	0.99	0.89	0.96	1	0.76	0.9	0.98	0.77	0.93	1	0.83	0.94	0.99
chr11:106648335:106648388:-@chr11:106648223:106648282:-	n/a	n/a	n/a	n/a	n/a	n/a	n/a	n/a	n/a	n/a	0.97	0.99	1	0.97	0.99	1	0.98	0.99	1	0.97	0.99	1	0.96	0.99	1	0.98	1	1	0.98	0.99	1	0.99	1	1	0.99	1	1	0.99	1	1	0.96	0.99	1	0.93	0.97	1	0.93	0.98	1
chr6:85087055:85087107:-@chr6:85086817:85086925:-	n/a	n/a	n/a	8	1.13131	15.9118	0.96	0.89	-0.07	0.431673	0.92	0.97	1	0.9	0.96	1	0.89	0.96	1	0.85	0.95	1	0.88	0.95	0.99	0.88	0.96	1	0.91	0.97	0.99	0.66	0.8	0.96	0.25	0.31	0.39	0.43	0.53	0.63	0.87	0.95	1	0.89	0.97	1	0.82	0.94	0.99
chr11:97989629:97989698:-@chr11:97976707:97976761:-@chr11:97974535:97974609:-	ENSMUSG00000020883	n/a	n/a	n/a	n/a	n/a	n/a	n/a	n/a	n/a	0.16	0.59	0.91	0.29	0.7	0.92	0.22	0.64	0.94	0.1	0.6	0.93	0.62	0.83	0.98	0.48	0.81	1	0.49	0.81	0.99	0.4	0.76	0.94	0.23	0.59	0.89	0.07	0.44	0.9	0.62	0.87	0.99	0.04	0.37	0.94	0.4	0.75	0.97
chr18:36828306:36828502:-@chr18:36827548:36827553:-@chr18:36827445:36827547:-@chr18:36826753:36827313:-	ENSMUSG00000006050	Sra1	steroid receptor RNA activator 1	17	0.464646	7.84099	0.08	0.11	0.03	2.10884	0.04	0.09	0.17	0.02	0.06	0.11	0.02	0.08	0.2	0.01	0.06	0.13	0	0.03	0.12	0	0.03	0.1	0.01	0.03	0.06	0	0.02	0.07	0.01	0.04	0.08	0.02	0.04	0.07	0.01	0.04	0.08	0.02	0.06	0.13	0.01	0.04	0.08
chr8:90643679:90643750:+@chr8:90648981:90649054:+@chr8:90653594:90655586:+	ENSMUSG00000036810	5033428A16Rik,Tmem188	17 days embryo heart cDNA,hypothetical protein LOC382030, clone:5033428A16 product:weakly similar to LD14173p (CG8009-PB) [Drosophila melanogaster],Mus musculus 11 days pregnant adult female ovary and uterus cDNA, RIKEN full-length enriched library, clone:I920029D04 product:weakly similar to LD14173p (CG8009-PB)., full insert sequence.	23	-2.0303	15.0269	0.82	0.95	0.13	1.6657	0.7	0.86	0.96	0.64	0.8	0.91	0.54	0.79	0.95	0.42	0.64	0.83	0.68	0.9	1	0.75	0.89	0.97	0.53	0.69	0.84	0.47	0.59	0.7	0.44	0.54	0.63	0.35	0.45	0.55	0.33	0.49	0.67	0.38	0.65	0.84	0.38	0.66	0.87
chr1:66981092:66981272:-@chr1:66980820:66980847:-@chr1:66976760:66976903:-	ENSMUSG00000061816	Myl1	myosin	18	1.82828	14.0756	0.1	0.25	0.15	1.14892	0.02	0.07	0.16	0.06	0.13	0.22	0.03	0.11	0.22	0.14	0.23	0.38	0.04	0.11	0.22	0.18	0.28	0.41	0.12	0.22	0.36	0.05	0.13	0.29	0.01	0.09	0.25	0.03	0.11	0.23	0	0.03	0.1	0.04	0.13	0.24	0.05	0.13	0.24
chr16:7363958:7363997:+@chr16:7369894:7369936:+@chr16:7375998:7376062:+	ENSMUSG00000008658	A2bp1	Ataxin-2 binding protein 1 variant 5.,ataxin 2 binding protein 1 isoform alpha,Ataxin-2 binding protein 1 variant 4.,ataxin 2 binding protein 1 isoform gamma,Ataxin-2 binding protein 1 variant 2.	n/a	n/a	n/a	n/a	n/a	n/a	n/a	0.67	0.88	0.98	0.63	0.92	0.99	0.5	0.77	0.97	0.51	0.8	0.99	0.68	0.88	0.98	0.59	0.85	0.99	0.6	0.87	0.99	0.29	0.59	0.89	0.21	0.68	0.99	0.67	0.9	1	0.35	0.7	0.96	0.51	0.82	0.99	0.26	0.68	0.98
chr9:64585391:64585566:-@chr9:64576041:64576236:-@chr9:64574431:64574624:-	ENSMUSG00000004771	Rab11a	RAB11a	n/a	n/a	n/a	n/a	n/a	n/a	n/a	0.95	0.99	1	0.95	0.99	1	0.96	0.99	1	0.96	0.99	1	0.95	0.98	1	0.94	0.98	1	0.97	0.99	1	0.98	1	1	0.96	0.99	1	0.98	0.99	1	0.91	0.97	1	0.95	0.98	1	0.89	0.97	1
chr7:31017350:31017555:+@chr7:31017711|31017769:31017842:+	ENSMUSG00000019738	n/a	n/a	n/a	n/a	n/a	n/a	n/a	n/a	n/a	0.01	0.03	0.1	0	0.04	0.12	0	0.02	0.07	0	0.03	0.1	0.01	0.07	0.17	0	0.02	0.05	0	0.02	0.07	0	0.02	0.07	0	0.05	0.14	0	0.02	0.07	0	0.02	0.07	0	0.05	0.16	0.02	0.12	0.29
chr5:75073533:75073898:-@chr5:75056127:75056246:-@chr5:75024145:75024386:-	ENSMUSG00000029228	Lnx1	E3 ubiquitin-protein ligase LNX (EC 6.3.2.-) (Numb-binding protein 1) (Ligand of Numb-binding protein 1) (Ligand of Numb-protein X 1).,ligand of numb-protein X 1	n/a	n/a	n/a	n/a	n/a	n/a	n/a	0.01	0.1	0.37	0	0.23	0.62	0.07	0.51	0.9	0.01	0.29	0.75	0	0.21	0.59	0.01	0.22	0.56	0.05	0.39	0.86	0.05	0.3	0.74	0.01	0.1	0.28	0.05	0.43	0.89	0.02	0.44	0.97	0.04	0.39	0.9	0.1	0.49	0.88
chr5:25265773:25265946:+@chr5:25304264:25304319:+@chr5:25315603:25315727:+	ENSMUSG00000056367	Actr3b	ARP3 actin-related protein 3 homolog B	n/a	n/a	n/a	n/a	n/a	n/a	n/a	0.65	0.84	0.97	0.7	0.84	0.94	0.74	0.89	0.98	0.61	0.82	0.95	0.37	0.73	0.97	0.69	0.88	0.98	0.73	0.89	0.98	0.73	0.84	0.93	0.85	0.96	0.99	0.77	0.92	0.99	0.63	0.84	0.97	0.36	0.69	0.93	0.45	0.81	0.97
chr7:133838939:133839354:-@chr7:133836267:133836318:-@chr7:133835442:133836173:-	ENSMUSG00000059772	Giyd2	clone:2410089K11 product:hypothetical protein, full insert sequence.,Mus musculus ES cells cDNA,GIY-YIG domain containing 2, RIKEN full-length enriched library	3	-0.252525	2.00677	0.65	0.56	-0.09	1.62077	0.27	0.65	0.96	0.17	0.58	0.93	0.41	0.73	0.94	0.23	0.65	0.95	0	0.34	0.87	0.02	0.28	0.9	0.09	0.3	0.59	0.25	0.64	0.95	0.26	0.7	0.96	0.22	0.62	0.94	0.27	0.67	0.97	0.11	0.51	0.89	0.15	0.49	0.79
chr2:179908615:179909651:+@chr2:179909865|179909948:179910097:+	ENSMUSG00000039041	Adrm1	adhesion regulating molecule 1	n/a	n/a	n/a	n/a	n/a	n/a	n/a	0.96	0.99	1	0.96	0.99	1	0.97	0.99	1	0.93	0.98	1	0.43	0.75	1	0.9	0.97	1	0.95	0.99	1	0.98	0.99	1	0.91	0.97	1	0.96	0.99	1	0.98	0.99	1	0.95	0.99	1	0.95	0.98	1
chr9:49331627:49331780:-@chr9:49328317|49328320:49328140:-	ENSMUSG00000039542	Ncam1	Mus musculus 10 days embryo whole body cDNA,Neural cell adhesion molecule (Fragment)., RIKEN full-length enriched library, clone:2610103A09 product:neural cell adhesion molecule 1, full insert sequence.,neural cell adhesion molecule 1 isoform 1	n/a	n/a	n/a	n/a	n/a	n/a	n/a	n/a	n/a	n/a	n/a	n/a	n/a	0.1	0.42	0.81	n/a	n/a	n/a	n/a	n/a	n/a	n/a	n/a	n/a	n/a	n/a	n/a	n/a	n/a	n/a	n/a	n/a	n/a	n/a	n/a	n/a	n/a	n/a	n/a	n/a	n/a	n/a	n/a	n/a	n/a
chr3:89222365:89222631:+@chr3:89226100:89226267:+@chr3:89226848:89226918:+	ENSMUSG00000042626	Shc1	src homology 2 domain-containing transforming	n/a	n/a	n/a	n/a	n/a	n/a	n/a	0.83	0.94	1	0.84	0.94	0.99	0.83	0.94	0.99	0.82	0.95	1	0.71	0.89	1	0.59	0.84	0.99	0.94	0.98	1	0.97	0.99	1	0.95	0.98	1	0.96	0.98	1	0.89	0.96	1	0.91	0.97	1	0.88	0.96	0.99
chr4:116295372:116296531:-@chr4:116291475:116291585:-@chr4:116286809:116287015:-	ENSMUSG00000028693	Nasp	nuclear autoantigenic sperm protein isoform 1	n/a	n/a	n/a	n/a	n/a	n/a	n/a	0.78	0.92	0.98	0.59	0.84	0.98	0.56	0.88	0.99	0.82	0.94	1	0.69	0.9	0.99	0.85	0.96	1	0.92	0.97	1	0.85	0.95	1	0.85	0.95	1	0.84	0.95	1	0.86	0.95	0.99	0.87	0.96	1	0.77	0.92	1
chr13:100785341:100785609:-@chr13:100772242:100772394:-@chr13:100770205:100770271:-	ENSMUSG00000021646	Mccc2	Mus musculus 18 days pregnant adult female placenta and extra embryonic tissue cDNA, clone:3830409E18 product:methylcrotonoyl-Coenzyme A carboxylase 2 (beta), RIKEN full-length enriched library	n/a	n/a	n/a	n/a	n/a	n/a	n/a	0.01	0.03	0.08	0	0.01	0.05	0	0.02	0.05	0.01	0.03	0.09	0	0.04	0.16	0	0.01	0.05	0.01	0.03	0.06	0.01	0.04	0.08	0.01	0.05	0.09	0.02	0.05	0.1	0	0.01	0.04	0	0.03	0.11	0	0.02	0.08
chr2:28549144:28549346:-@chr2:28548432:28548579:-@chr2:28547599:28547672:-	n/a	na/a	n/a	n/a	n/a	n/a	n/a	n/a	n/a	n/a	n/a	n/a	n/a	n/a	n/a	n/a	n/a	n/a	n/a	n/a	n/a	n/a	n/a	n/a	n/a	n/a	n/a	n/a	n/a	n/a	n/a	n/a	n/a	n/a	n/a	n/a	n/a	n/a	n/a	n/a	n/a	n/a	n/a	n/a	n/a	n/a	n/a	n/a	n/a
chr18:38114336:38114418:-@chr18:38112125:38112267:-@chr18:38105348:38105429:-	ENSMUSG00000024454	Hdac3	histone deacetylase 3	n/a	n/a	n/a	n/a	n/a	n/a	n/a	0.78	0.92	0.99	0.87	0.96	0.99	0.82	0.94	1	0.84	0.94	1	0.79	0.93	0.99	0.9	0.97	0.99	0.89	0.96	0.99	0.68	0.87	0.98	0.93	0.98	1	0.92	0.98	1	0.82	0.94	1	0.85	0.96	1	0.65	0.86	0.99
chr11:3584617:3584751|3584748:+@chr11:3584841:3585592:+	ENSMUSG00000034543	Morc2a	microrchidia 2A	-11	0.868687	7.27337	0.43	0.24	-0.2	-1.6318	0.32	0.64	0.89	0.09	0.4	0.72	0.02	0.26	0.65	0.09	0.29	0.59	0.2	0.41	0.66	0.01	0.08	0.27	0.08	0.2	0.4	0.28	0.45	0.64	0.25	0.42	0.59	0.19	0.4	0.66	0	0.14	0.38	0.15	0.48	0.76	0.08	0.2	0.4
chr3:95542162:95542224:-@chr3:95541935:95542039:-@chr3:95541731:95541865:-	ENSMUSG00000028108	Ecm1	extracellular matrix protein 1	n/a	n/a	n/a	n/a	n/a	n/a	n/a	0.82	0.95	1	0.81	0.95	1	0.81	0.93	1	0.83	0.93	0.99	0.64	0.85	0.98	0.74	0.92	1	0.72	0.91	1	0.73	0.89	0.98	0.81	0.93	0.99	0.73	0.9	0.99	0.76	0.92	1	0.59	0.85	0.99	0.58	0.84	0.99
chr1:37487015:37487338:+@chr1:37488138|37488142:37488421:+	ENSMUSG00000026111	Unc50	UNC50	n/a	n/a	n/a	n/a	n/a	n/a	n/a	0.02	0.46	0.91	0.15	0.63	0.97	0.04	0.53	0.85	0.36	0.78	0.99	0.23	0.68	0.98	0.57	0.83	0.99	0.6	0.89	1	0.35	0.74	0.97	0.22	0.59	0.93	0.22	0.73	0.98	0.44	0.78	0.97	0.07	0.59	0.91	0.14	0.62	0.97
chr3:152403093:152403204:+@chr3:152403717:152403857:+@chr3:152405453:152405549:+	ENSMUSG00000039047	Pigk	,phosphatidylinositol glycan anchor biosynthesis	n/a	n/a	n/a	n/a	n/a	n/a	n/a	0	0.04	0.14	0	0.05	0.14	0.01	0.09	0.32	0	0.05	0.16	0.01	0.07	0.24	0	0.03	0.1	0	0.02	0.07	0	0.03	0.1	0	0.05	0.17	0.01	0.08	0.23	0	0.07	0.26	0.01	0.05	0.14	0.03	0.12	0.32
chr18:75161004:75161044:+@chr18:75161320:75161454:+	n/a	n/a	n/a	n/a	n/a	n/a	n/a	n/a	n/a	n/a	0	0.01	0.01	0	0	0.01	0	0	0.01	0	0	0.01	0	0	0.01	0	0	0.01	0.01	0.01	0.01	0	0	0.01	0.01	0.01	0.02	0.01	0.01	0.01	0	0	0.01	0	0.01	0.01	0.01	0.01	0.02
chr14:57562903:57563074:+@chr14:57563523:57563600:+@chr14:57565328:57565453:+	ENSMUSG00000021945	Zmym2	zinc finger protein 198	n/a	n/a	n/a	n/a	n/a	n/a	n/a	0	0.07	0.22	0.01	0.12	0.27	0	0.11	0.41	0.02	0.07	0.19	0	0.05	0.22	0	0.06	0.16	0.07	0.17	0.31	0.02	0.2	0.51	0.04	0.15	0.32	0.01	0.06	0.16	0.01	0.17	0.59	0.08	0.23	0.5	0.04	0.16	0.34
chr10:75071496:75071632:+@chr10:75071944:75072137:+@chr10:75072590:75072696:+	ENSMUSG00000006344	Ggtla1	gamma-glutamyltransferase-like activity 1, complete cds.,Mus musculus gamma-glutamyl leukotrienase mRNA	6	-0.636364	7.71651	0.79	0.82	0.03	0.860021	0.42	0.77	0.97	0.64	0.87	1	0.43	0.73	0.96	0.5	0.79	0.99	0.25	0.63	0.94	0.22	0.48	0.83	0.45	0.71	0.95	0.43	0.71	0.93	0.11	0.32	0.6	0.51	0.75	0.97	0.62	0.85	0.99	0.48	0.76	0.97	0.35	0.73	0.99
chr11:115473217:115474098:-@chr11:115471731:115471796:-@chr11:115470853:115470962:-	ENSMUSG00000020743	Mif4gd	RIKEN full-length enriched library,18-day embryo whole body cDNA, full insert sequence (Mif4gd protein).,Mif4gd protein., clone:1110014L05 product:hypothetical ARM repeat structure containing protein,MIF4G domain containing	-17	1	11.6489	0.17	0.16	-0.01	-1.54521	0.01	0.06	0.18	0	0.03	0.09	0.28	0.42	0.55	0.23	0.39	0.58	0.08	0.34	0.82	0.03	0.13	0.32	0.01	0.05	0.13	0.01	0.03	0.08	0.01	0.07	0.22	0.01	0.07	0.2	0	0.08	0.26	0.01	0.13	0.37	0	0.06	0.24
chr17:56718267:56718116|56718064:-@chr17:56717266:56717328:-	ENSMUSG00000042625	Safb2	RIKEN full-length enriched library, clone:6330514O11 product:inferred: hypothetical protein KIAA0138 {Homo sapiens},Mus musculus adult male medulla oblongata cDNA, full insert sequence.,scaffold attachment factor B2, clone:G270043F24 product:Scaffold attachment factor B2 homolog [Mus musculus],Mus musculus melanocyte cDNA	n/a	n/a	n/a	n/a	n/a	n/a	n/a	0.76	0.92	0.99	0.7	0.88	0.99	0.76	0.92	0.99	0.63	0.83	0.96	0.73	0.91	0.99	0.56	0.8	0.95	0.83	0.94	0.99	0.85	0.96	1	0.76	0.91	0.99	0.82	0.94	1	0.87	0.96	1	0.65	0.89	0.99	0.81	0.94	0.99
chr13:113590984:113591474:+@chr13:113625067:113625221:+@chr13:113641611:113641762:+@chr13:113646954:113647234:+	ENSMUSG00000021759	Ppap2a	phosphatidic acid phosphatase 2a isoform 1	-49	-2.65657	17.4958	0.51	0.3	-0.2	-2.64883	0.47	0.56	0.66	0.25	0.37	0.49	0.48	0.59	0.71	0.41	0.52	0.62	0.52	0.67	0.81	0.47	0.55	0.63	0.38	0.47	0.56	0.56	0.64	0.71	0.42	0.51	0.6	0.32	0.41	0.51	0.33	0.45	0.58	0.28	0.42	0.55	0.36	0.49	0.64
chr19:3936269:3936275:+@chr19:3936307:3936422:+	n/a	n/a	n/a	n/a	n/a	n/a	n/a	n/a	n/a	n/a	0.47	0.77	0.96	n/a	n/a	n/a	0.59	0.83	0.97	n/a	n/a	n/a	n/a	n/a	n/a	0.71	0.92	0.99	0.61	0.88	1	0.54	0.87	1	n/a	n/a	n/a	n/a	n/a	n/a	n/a	n/a	n/a	n/a	n/a	n/a	n/a	n/a	n/a
chr8:73420032:73420211:-@chr8:73419815:73419944:-@chr8:73419278:73419608:-	ENSMUSG00000045128	Rpl18a	Rpl18a protein.,Ribosomal protein L18A	n/a	n/a	n/a	n/a	n/a	n/a	n/a	0.99	1	1	1	1	1	1	1	1	0.99	1	1	0.99	1	1	0.99	1	1	1	1	1	1	1	1	1	1	1	1	1	1	1	1	1	0.99	1	1	0.99	1	1
chr7:3603635:3603730:+@chr7:3604799|3604802:3605021:+	ENSMUSG00000035632	Cnot3,AK031165	Mus musculus 13 days embryo forelimb cDNA, subunit 3, RIKEN full-length enriched library,CCR4-NOT transcription complex, full insert sequence., clone:5930419P19 product:unclassifiable	n/a	n/a	n/a	n/a	n/a	n/a	n/a	0.02	0.13	0.36	0.03	0.17	0.46	0.01	0.1	0.26	0	0.14	0.4	0.01	0.16	0.45	0.01	0.07	0.24	0	0.04	0.15	0.01	0.12	0.37	0	0.09	0.28	0	0.07	0.24	0	0.13	0.53	0	0.07	0.2	0	0.09	0.26
chr15:75878545:75878582:-@chr15:75878352:75878426:-@chr15:75877594:75878102:-	ENSMUSG00000022568	Scrib	PDZ-domain protein scribble	-2	0.272727	2.89834	0.31	0.27	-0.05	-0.784148	0.03	0.22	0.53	0.21	0.43	0.74	0.09	0.29	0.52	0.01	0.11	0.33	0.03	0.48	0.95	0.21	0.53	0.87	0	0.05	0.17	0.11	0.35	0.74	0.02	0.24	0.63	0.17	0.5	1	0	0.07	0.29	0.05	0.28	0.75	0.06	0.39	0.86
chr2:173418303:173418515:-@chr2:173417722|173417834:173417618:-	ENSMUSG00000055897	AK046224,AK029171,AK170078,AK164611,AK005746,AK161459	clone:1700007P14 product:unclassifiable, full insert sequence.,Mus musculus adult male testis cDNA, RIKEN full-length enriched library	n/a	n/a	n/a	n/a	n/a	n/a	n/a	0.19	0.52	0.86	0.2	0.5	0.85	0.1	0.35	0.67	0.37	0.71	0.96	n/a	n/a	n/a	0.06	0.48	0.95	0.06	0.19	0.41	0.03	0.18	0.43	0.19	0.59	0.88	0.1	0.46	0.92	n/a	n/a	n/a	0.49	0.81	0.97	0.14	0.51	0.94
chr3:75345082:75345300:-@chr3:75337512|75337516:75337463:-	ENSMUSG00000027835	Pdcd10	programmed cell death 10	n/a	n/a	n/a	n/a	n/a	n/a	n/a	0.36	0.73	0.98	0.25	0.66	0.96	0.21	0.68	0.95	0.71	0.9	0.99	0.42	0.75	0.96	0.37	0.73	0.97	0.71	0.9	1	0.85	0.95	0.99	0.62	0.88	1	0.61	0.86	0.99	0.35	0.71	0.95	0.65	0.87	0.99	0.52	0.83	0.98
chr15:76424959:76425040:+@chr15:76425104:76425182:+	n/a	n/a	n/a	n/a	n/a	n/a	n/a	n/a	n/a	n/a	n/a	n/a	n/a	0.03	0.18	0.56	n/a	n/a	n/a	n/a	n/a	n/a	n/a	n/a	n/a	0.09	0.43	0.84	0.02	0.17	0.46	0.06	0.24	0.58	0.01	0.07	0.18	0.02	0.07	0.19	0.04	0.28	0.76	n/a	n/a	n/a	n/a	n/a	n/a
chr11:115489379:115489612:-@chr11:115488951:115489187:-@chr11:115485513:115485682:-	ENSMUSG00000020744	Slc25a19	clone:1700007G02 product:solute carrier family 25 (mitochondrial deoxynucleotide carrier), member 19,Mus musculus adult male testis cDNA, RIKEN full-length enriched library	24	-0.646465	9.55929	0.13	0.4	0.27	2.57827	0.05	0.14	0.26	0.06	0.15	0.28	0.02	0.09	0.2	0.04	0.1	0.18	0.02	0.08	0.21	0.1	0.21	0.33	0.12	0.22	0.37	0.14	0.24	0.36	0.11	0.19	0.31	0.04	0.08	0.14	0.19	0.35	0.54	0.02	0.11	0.28	0.04	0.16	0.34
chr12:60083555:60083691:-@chr12:60079550|60079602:60079449:-	ENSMUSG00000020986	Sec23a	SEC23A	2	-0.0505051	5.87646	0.87	0.79	-0.09	0.348935	0.72	0.91	0.99	0.6	0.81	0.98	0.76	0.9	0.99	0.68	0.91	1	0.32	0.56	0.82	0.49	0.79	0.99	0.75	0.9	1	0.48	0.72	1	0.23	0.46	0.79	0.63	0.83	0.98	0.78	0.92	0.99	0.36	0.63	0.87	0.33	0.61	0.93
chr5:38893198:38893415:-@chr5:38892879:38892955:-@chr5:38874231:38874624:-	n/a	na/a	n/a	n/a	n/a	n/a	n/a	n/a	n/a	n/a	n/a	n/a	n/a	n/a	n/a	n/a	n/a	n/a	n/a	n/a	n/a	n/a	n/a	n/a	n/a	n/a	n/a	n/a	n/a	n/a	n/a	n/a	n/a	n/a	n/a	n/a	n/a	n/a	n/a	n/a	n/a	n/a	n/a	n/a	n/a	n/a	n/a	n/a	n/a
chr4:146627406:146627510:+@chr4:146630905:146631031:+@chr4:146703091:146703217:+@chr4:146705377:146705888:+	ENSMUSG00000078498	AK049536	7 days embryo whole body cDNA, clone:C430020H24 product:hypothetical KRAB box containing protein, RIKEN full-length enriched library	n/a	n/a	n/a	n/a	n/a	n/a	n/a	0.03	0.25	0.68	0.02	0.2	0.43	0.01	0.18	0.54	0.01	0.19	0.52	0.07	0.43	0.89	0.01	0.11	0.31	0.01	0.09	0.27	0	0.12	0.38	0.01	0.13	0.34	0.01	0.07	0.2	n/a	n/a	n/a	0	0.07	0.23	0.01	0.17	0.48
chr11:54663847:54663989:-@chr11:54662162|54662898:54662081:-	ENSMUSG00000020268	Lyrm7	LYR motif containing 7	n/a	n/a	n/a	n/a	n/a	n/a	n/a	n/a	n/a	n/a	0.09	0.26	0.54	n/a	n/a	n/a	0	0.02	0.09	n/a	n/a	n/a	n/a	n/a	n/a	0.03	0.08	0.15	0	0.03	0.17	0.01	0.05	0.12	0.03	0.07	0.15	n/a	n/a	n/a	n/a	n/a	n/a	n/a	n/a	n/a
chr4:116381114:116381699:+@chr4:116381845|116382043:116382224:+	ENSMUSG00000028689	n/a	n/a	n/a	n/a	n/a	n/a	n/a	n/a	n/a	0.05	0.32	0.72	0.1	0.36	0.84	n/a	n/a	n/a	0.16	0.54	0.92	n/a	n/a	n/a	0.03	0.23	0.55	0.3	0.72	0.98	0.38	0.66	0.89	0.26	0.47	0.7	0.25	0.44	0.69	0.11	0.27	0.47	0.12	0.51	0.9	0.12	0.47	0.9
chr8:112127203:112127402:-@chr8:112125545:112125638:-@chr8:112125218:112125405:-	ENSMUSG00000031730	Dhodh	complete cds; nuclear gene for mitochondrial product.,Mus musculus dihydroorotate dehydrogenase mRNA,dihydroorotate dehydrogenase	n/a	n/a	n/a	n/a	n/a	n/a	n/a	0.01	0.08	0.2	0	0.05	0.19	0.01	0.08	0.23	0.01	0.11	0.35	0	0.06	0.19	0.01	0.16	0.59	0	0.06	0.21	0.01	0.07	0.22	0.03	0.16	0.5	0.01	0.1	0.3	0.01	0.06	0.2	0.01	0.09	0.33	0.01	0.16	0.54
chr11:116701859:116701762|116701724:-@chr11:116700283:116700442:-	ENSMUSG00000056962	mKIAA0585,Jmjd6,Ptdsr	Mus musculus apoptotic cell clearance receptor PtdSerR mRNA, complete cds.,jumonji domain containing 6,Protein PTDSR (Phosphatidylserine receptor) (Apoptotic cell clearance receptor PtdSerR).	n/a	n/a	n/a	n/a	n/a	n/a	n/a	0.65	0.87	0.98	0.78	0.93	0.99	0.61	0.85	1	0.67	0.88	0.98	0.64	0.87	0.99	0.6	0.85	0.98	0.83	0.94	0.99	0.78	0.92	0.99	0.47	0.74	0.94	0.54	0.85	0.99	0.73	0.9	0.98	0.53	0.81	0.99	0.67	0.9	0.98
chr7:54101208:54101287:+@chr7:54102909|54102966:54103115:+	ENSMUSG00000063229	Ldha	lactate dehydrogenase A, A chain, RIKEN full-length enriched library, clone:G430005E01 product:lactate dehydrogenase 1, full insert sequence.,Mus musculus kidney CCL-142 RAG cDNA	n/a	n/a	n/a	n/a	n/a	n/a	n/a	0	0.01	0.01	0	0	0.01	0	0	0.01	0	0	0.01	0	0.01	0.02	0	0	0.01	0	0	0.01	0	0	0.01	0	0	0.01	0	0	0	0	0	0.01	0	0.01	0.02	0	0.01	0.02
chr5:89043966:89044139:+@chr5:89045487:89045604:+	n/a	n/a	n/a	n/a	n/a	n/a	n/a	n/a	n/a	n/a	0	0.01	0.02	0	0.01	0.04	0	0.02	0.04	0	0.01	0.02	0	0.01	0.04	0	0.01	0.03	0	0.01	0.02	0	0.01	0.04	0	0	0.01	0	0	0.01	0	0	0.02	0.04	0.12	0.27	0	0.01	0.02
chr10:80641426:80641639|80641637:+@chr10:80641826:80642004:+	ENSMUSG00000034994	Eef2	full insert sequence., clone:4732472F11 product:ELONGATION FACTOR 2 (EF-2) homolog [Mus musculus],Mus musculus 10 days neonate skin cDNA,eukaryotic translation elongation factor 2, RIKEN full-length enriched library	n/a	n/a	n/a	n/a	n/a	n/a	n/a	0	0	0.01	0	0	0	0	0	0.01	0	0	0.01	0	0.01	0.02	0	0	0.01	0	0	0	0	0	0.01	0	0	0	0	0	0	0	0	0.01	0	0	0.01	0	0.01	0.02
chr5:110569373:110569478|110569472:+@chr5:110572570:110572679:+	ENSMUSG00000014668	Chfr	checkpoint with forkhead and ring finger,16 days embryo kidney cDNA, clone:I920088D14 product:Ubiquitin ligase protein CHFR (EC 6.3.2.-) (Checkpoint with forkhead and RING finger domains protein) homolog., RIKEN full-length enriched library	n/a	n/a	n/a	n/a	n/a	n/a	n/a	0.01	0.22	0.55	n/a	n/a	n/a	0.09	0.37	0.74	0.09	0.43	0.8	n/a	n/a	n/a	0.04	0.21	0.6	0	0.06	0.22	0.02	0.24	0.71	0.02	0.12	0.28	0.03	0.23	0.6	0.07	0.33	0.71	0.04	0.52	0.89	0.06	0.25	0.56
chr2:164660198:164660248:+@chr2:164660338:164660424:+	n/a	n/a	n/a	n/a	n/a	n/a	n/a	n/a	n/a	n/a	0.04	0.07	0.11	0.04	0.08	0.12	0.07	0.1	0.15	0.06	0.1	0.16	0.01	0.03	0.06	0.04	0.07	0.11	0.01	0.02	0.05	0.07	0.11	0.18	0.06	0.12	0.2	0.05	0.11	0.19	0.03	0.06	0.1	0.01	0.04	0.08	0.08	0.15	0.23
chr1:14294506:14294700:-@chr1:14292851:14292978:-@chr1:14273202:14273279:-	n/a	na/a	n/a	n/a	n/a	n/a	n/a	n/a	n/a	n/a	n/a	n/a	n/a	n/a	n/a	n/a	n/a	n/a	n/a	n/a	n/a	n/a	n/a	n/a	n/a	n/a	n/a	n/a	n/a	n/a	n/a	n/a	n/a	n/a	0.16	0.53	0.94	n/a	n/a	n/a	n/a	n/a	n/a	n/a	n/a	n/a	n/a	n/a	n/a
chr9:70427759:70427862:+@chr9:70427939|70427974:70428037:+	ENSMUSG00000032212	Sltm,Met	Mus musculus modulator of estrogen induced transcription (Met) mRNA, complete cds.,modulator of estrogen induced transcription	6	0.212121	4.83939	0.14	0.12	-0.02	1.19599	0.02	0.13	0.32	0.01	0.09	0.21	0.03	0.21	0.59	0	0.08	0.35	0.02	0.1	0.31	0	0.05	0.17	0	0.05	0.24	0.02	0.08	0.17	0	0.03	0.11	0.01	0.05	0.13	0	0.08	0.26	0.01	0.06	0.19	0.02	0.1	0.21
chr19:6352775:6352861:+@chr19:6353120|6353131:6353190:+	ENSMUSG00000024948	Map4k2	Mus musculus 10 days embryo whole body cDNA, RIKEN full-length enriched library, clone:2610037E03 product:mitogen activated protein kinase kinase kinase kinase 2, clone:F630020E23 product:mitogen activated protein kinase kinase kinase kinase 2,NOD-derived CD11c +ve dendritic cells cDNA, full insert sequence.,mitogen activated protein kinase kinase kinase,Map4k2 protein.	n/a	n/a	n/a	n/a	n/a	n/a	n/a	0.76	0.92	0.99	0.79	0.93	0.99	0.75	0.89	0.97	0.31	0.71	0.96	0.53	0.83	0.99	0.36	0.74	0.99	0.68	0.89	1	0.7	0.87	0.97	0.5	0.75	0.94	0.54	0.77	0.96	0.69	0.87	0.97	0.53	0.8	0.95	0.4	0.76	0.96
chr7:125272983:125273176:-@chr7:125272410:125272582:-@chr7:125270648:125270781:-@chr7:125269814:125270029:-	ENSMUSG00000030654	Arl6ip1	ADP-ribosylation factor-like 6 interacting	28	-3.54545	16.7545	0.03	0.07	0.04	1.88281	0	0.03	0.08	0	0.03	0.11	0	0.02	0.08	0.02	0.06	0.12	0.01	0.06	0.17	0	0.02	0.08	0	0.02	0.06	0.01	0.03	0.06	0	0.01	0.02	0	0.01	0.02	0.12	0.2	0.29	0.01	0.06	0.15	0.1	0.2	0.34
chr15:81961846:81961975:+@chr15:81962175:81962259:+@chr15:81965011:81965192:+	ENSMUSG00000068114	Ccdc134	RIKEN full-length enriched library,Mus musculus 0 day neonate skin cDNA,coiled-coil domain containing 134, clone:4632413E06 product:hypothetical protein, full insert sequence.,Coiled-coil domain-containing protein 134 precursor.	n/a	n/a	n/a	n/a	n/a	n/a	n/a	0.27	0.67	0.92	0.32	0.73	0.98	0.14	0.56	0.99	0.29	0.74	0.96	0.36	0.77	0.99	0.16	0.52	0.86	0.53	0.83	0.97	0.42	0.7	0.94	0.31	0.69	0.95	0.47	0.75	0.96	0.57	0.85	0.99	0.19	0.58	0.9	0.46	0.81	0.98
chr7:50566401:50567568:-@chr7:50563837:50563942:-@chr7:50556790:50557107:-	n/a	n/a	n/a	n/a	n/a	n/a	n/a	n/a	n/a	n/a	0.07	0.27	0.59	0.04	0.21	0.49	0.02	0.22	0.68	0.1	0.31	0.55	0.05	0.39	0.87	0.01	0.13	0.35	0.01	0.09	0.29	0	0.11	0.45	0.12	0.31	0.57	0.01	0.14	0.31	0.05	0.18	0.48	0.02	0.1	0.33	0	0.19	0.55
chr4:116489188:116489301:+@chr4:116489383:116489480:+@chr4:116489560:116489704:+	n/a	na/a	n/a	n/a	n/a	n/a	n/a	n/a	n/a	n/a	n/a	n/a	n/a	n/a	n/a	n/a	0.47	0.75	0.98	n/a	n/a	n/a	n/a	n/a	n/a	n/a	n/a	n/a	n/a	n/a	n/a	n/a	n/a	n/a	n/a	n/a	n/a	n/a	n/a	n/a	n/a	n/a	n/a	n/a	n/a	n/a	n/a	n/a	n/a
chr10:86158482:86158408|86158405:-@chr10:86158222:86158287:-	ENSMUSG00000020048	Hsp90b1	tumor rejection antigen gp96	n/a	n/a	n/a	n/a	n/a	n/a	n/a	0.92	0.97	1	0.9	0.97	1	0.92	0.98	1	0.96	0.99	1	0.92	0.97	1	0.98	1	1	0.95	0.99	1	0.97	0.99	1	0.98	0.99	1	0.97	0.99	1	0.91	0.98	1	0.92	0.98	1	0.96	0.99	1
chr2:51828429:51828724:-@chr2:51828108:51828147:-@chr2:51815756:51816180:-	n/a	n/a	n/a	n/a	n/a	n/a	n/a	n/a	n/a	n/a	0.07	0.29	0.68	0.06	0.39	0.77	0.01	0.17	0.55	0.07	0.53	0.98	n/a	n/a	n/a	0.31	0.64	0.89	0.14	0.49	0.89	0.4	0.66	0.88	0.36	0.63	0.83	0.44	0.73	0.92	n/a	n/a	n/a	0.02	0.29	0.8	n/a	n/a	n/a
chr4:146348057:146348149:+@chr4:146356803:146356906:+@chr4:146627453:146627510:+@chr4:146630905:146631031:+	ENSMUSG00000067919	AK049536,Rex2	complete cds., RIKEN full-length enriched library, clone:C430020H24 product:hypothetical KRAB box containing protein,7 days embryo whole body cDNA,Mus musculus putative REX-2 mRNA, full insert sequence. (Fragment).	n/a	n/a	n/a	n/a	n/a	n/a	n/a	0.49	0.81	1	0.27	0.67	0.97	0.26	0.68	0.98	n/a	n/a	n/a	n/a	n/a	n/a	0.58	0.83	0.97	0.24	0.59	0.99	0.64	0.89	0.99	0.27	0.64	0.96	0.44	0.78	0.97	0.13	0.64	0.95	0.69	0.89	1	0.04	0.55	0.97
chr17:27792454:27792704:+@chr17:27838677|27838771:27838886:+	n/a	na/a	n/a	n/a	n/a	n/a	n/a	n/a	n/a	n/a	n/a	n/a	n/a	n/a	n/a	n/a	n/a	n/a	n/a	n/a	n/a	n/a	n/a	n/a	n/a	n/a	n/a	n/a	n/a	n/a	n/a	n/a	n/a	n/a	n/a	n/a	n/a	n/a	n/a	n/a	n/a	n/a	n/a	n/a	n/a	n/a	n/a	n/a	n/a
chr7:150255841:150256197:+@chr7:150256697:150256992:+	n/a	n/a	n/a	4	-0.393939	2.48965	0.83	0.95	0.11	1.76488	0.55	0.72	0.93	0.74	0.88	0.98	0.73	0.9	0.99	0.79	0.93	0.99	0.74	0.88	0.97	0.62	0.82	0.99	0.88	0.97	1	0.63	0.78	0.9	0.84	0.95	1	0.88	0.97	1	0.71	0.84	0.96	0.82	0.93	0.99	0.57	0.75	0.95
chr10:80324925:80325107|80325047:+@chr10:80325444:80325533:+	ENSMUSG00000035206	Sppl2b,3110056O03Rik	RIKEN full-length enriched library,signal peptide peptidase-like 2B,Mus musculus 10 days neonate medulla oblongata cDNA,Signal peptide peptidase-like 2B (EC 3.4.23.-) (Protein SPP-like 2B) (Protein SPPL2b)., full insert sequence., clone:B830011P16 product:hypothetical Protease associated (PA) domain containing protein	n/a	n/a	n/a	n/a	n/a	n/a	n/a	0.54	0.81	0.99	0.52	0.79	0.98	0.53	0.8	0.98	0.39	0.73	0.95	0.28	0.68	0.97	0.63	0.87	1	0.56	0.85	0.99	0.47	0.78	0.98	0.74	0.9	0.99	0.63	0.89	1	0.56	0.84	0.98	0.28	0.61	0.88	n/a	n/a	n/a
chr2:109114546:109114832:-@chr2:109080437:109080573:-@chr2:109031709:109031845:-	ENSMUSG00000057234	Mett5d1	clone:0610027B03 product:hypothetical Methyltransferase family containing protein,Mus musculus adult male kidney cDNA, full insert sequence.,methyltransferase 5 domain containing 1, RIKEN full-length enriched library	n/a	n/a	n/a	n/a	n/a	n/a	n/a	0	0.09	0.34	0.01	0.11	0.35	0	0.16	0.48	0.04	0.45	0.96	0	0.15	0.6	0.01	0.05	0.17	0.01	0.07	0.32	0.1	0.41	0.81	0.01	0.07	0.27	0	0.06	0.16	n/a	n/a	n/a	0.03	0.3	0.94	0.05	0.27	0.55
chr11:106675075:106675180|106675176:+@chr11:106675918:106676050:+	ENSMUSG00000018372	Ccdc45,BC058545	clone:D630032N03 product:hypothetical Calponin-homology domain, CH-domain structure containing protein, RIKEN full-length enriched library, full insert sequence., clone:D330027A14 product:weakly similar to VEGETATIVE CELL WALL PROTEIN GP1 PRECURSOR (HYDROXYPROLINE-RICH GLYCOPROTEIN 1) [Chlamydomonas reinhardtii],Mus musculus 0 day neonate kidney cDNA,Mus musculus 13 days embryo heart cDNA,coiled-…	n/a	n/a	n/a	n/a	n/a	n/a	n/a	0.03	0.29	0.62	0.08	0.61	0.93	0.12	0.43	0.77	0.06	0.27	0.62	0.05	0.32	0.78	0.06	0.3	0.64	0.19	0.65	0.95	0.03	0.25	0.72	0.06	0.19	0.44	0.12	0.26	0.43	0.06	0.33	0.72	0.04	0.68	0.99	0.01	0.37	0.83
chr3:88521248:88521392:+@chr3:88521495:88521580:+	n/a	n/a	n/a	n/a	n/a	n/a	n/a	n/a	n/a	n/a	0.01	0.03	0.08	0	0.04	0.11	0.01	0.03	0.08	0.02	0.06	0.12	0	0.04	0.13	0.02	0.08	0.17	0	0.02	0.06	0	0.01	0.06	0	0.02	0.05	0.01	0.02	0.05	0.01	0.03	0.08	0.01	0.05	0.14	0.01	0.06	0.15
chr2:30214663:30214837:-@chr2:30210803:30210922:-@chr2:30210373:30210501:-	ENSMUSG00000026860	Sh3glb2	SH3-domain GRB2-like endophilin B2	-4	-0.20202	2.8212	0.97	0.85	-0.12	-1.34623	0.92	0.97	1	0.88	0.96	1	0.92	0.97	1	0.78	0.9	0.98	0.64	0.87	0.99	0.89	0.97	1	0.91	0.97	1	0.96	0.99	1	0.94	0.98	1	0.96	0.99	1	0.91	0.97	1	0.69	0.87	0.99	0.61	0.85	0.99
chr10:80006392:80006465:-@chr10:80006156|80006242:80006046:-	ENSMUSG00000047417	Rexo1	transcription elongation factor B polypeptide 3	n/a	n/a	n/a	n/a	n/a	n/a	n/a	0.01	0.07	0.22	0.02	0.11	0.3	0.08	0.22	0.43	0	0.04	0.13	0.08	0.34	0.72	0.01	0.09	0.23	0.04	0.14	0.29	0.02	0.1	0.34	0	0.03	0.12	0	0.07	0.26	0.01	0.09	0.21	0.05	0.22	0.5	0.01	0.12	0.4
chr10:116018509:116018567:-@chr10:115986161|115986231:115986089:-	ENSMUSG00000020166	Cnot2	subunit 2,CCR4-NOT transcription complex	27	1.20202	12.9318	0.54	0.75	0.21	1.99492	0.31	0.57	0.83	0.1	0.33	0.63	0.37	0.72	0.95	0.12	0.24	0.38	0.47	0.81	0.99	0.3	0.48	0.72	0.36	0.54	0.75	0.32	0.47	0.61	0.39	0.55	0.7	0.48	0.61	0.72	0.44	0.71	0.93	0.48	0.72	0.95	0.53	0.78	0.95
chr10:28442281:28442442:+@chr10:28480961:28481419:+@chr10:28501497:28502548:+	n/a	na/a	n/a	n/a	n/a	n/a	n/a	n/a	n/a	n/a	n/a	n/a	n/a	n/a	n/a	n/a	n/a	n/a	n/a	n/a	n/a	n/a	n/a	n/a	n/a	n/a	n/a	n/a	n/a	n/a	n/a	n/a	n/a	n/a	n/a	n/a	n/a	n/a	n/a	n/a	n/a	n/a	n/a	n/a	n/a	n/a	n/a	n/a	n/a
chr17:79234855:79235018:+@chr17:79236134:79236260:+@chr17:79237171:79237242:+	ENSMUSG00000050668	2310002B06Rik	hypothetical protein LOC53951	n/a	n/a	n/a	n/a	n/a	n/a	n/a	0.56	0.79	0.96	0.56	0.8	0.97	0.64	0.86	0.98	0.48	0.79	0.98	0.33	0.6	0.93	0.56	0.78	0.93	0.71	0.88	0.99	0.75	0.91	0.98	0.79	0.91	0.98	0.76	0.93	1	0.55	0.89	1	0.82	0.94	1	0.53	0.82	0.99
chr7:52389268:52389396:-@chr7:52387598:52387782:-	n/a	n/a	n/a	-9	1.27273	13.4328	0.42	0.55	0.12	-0.764748	0.3	0.43	0.6	0.3	0.45	0.65	0.28	0.39	0.54	0.5	0.71	0.94	0.47	0.8	0.98	0.46	0.67	0.89	0.3	0.43	0.64	0.54	0.77	0.95	0.49	0.75	0.95	0.53	0.75	0.94	0.21	0.3	0.44	0.31	0.5	0.77	0.36	0.62	0.93
chr19:4266522:4266637:-@chr19:4266375:4266446:-	n/a	n/a	n/a	n/a	n/a	n/a	n/a	n/a	n/a	n/a	n/a	n/a	n/a	0.06	0.41	0.88	0.02	0.11	0.31	n/a	n/a	n/a	n/a	n/a	n/a	n/a	n/a	n/a	0.04	0.17	0.41	0.04	0.2	0.51	n/a	n/a	n/a	n/a	n/a	n/a	n/a	n/a	n/a	0.12	0.36	0.69	n/a	n/a	n/a
chr11:78104212:78104441:+@chr11:78104923|78104926:78105171:+	ENSMUSG00000037593	BC030499	hypothetical protein LOC216976	n/a	n/a	n/a	n/a	n/a	n/a	n/a	n/a	n/a	n/a	n/a	n/a	n/a	n/a	n/a	n/a	n/a	n/a	n/a	n/a	n/a	n/a	n/a	n/a	n/a	0.36	0.82	0.99	0.06	0.33	0.86	0.08	0.42	0.77	0.06	0.4	0.9	0.14	0.56	0.96	n/a	n/a	n/a	n/a	n/a	n/a
chr13:101424146:101424238:+@chr13:101424989:101426015:+	n/a	n/a	n/a	-3	0.868687	7.09053	0.01	0.01	0	-0.545613	0	0.01	0.02	0	0.01	0.02	0	0.01	0.02	0	0.01	0.02	0	0	0.02	0	0.01	0.02	0	0.01	0.02	0.02	0.04	0.06	0	0.01	0.01	0	0.01	0.02	0	0.01	0.03	0.01	0.02	0.05	0	0.01	0.03
chr11:59264177:59267147:+@chr11:59267294|59267380:59267561:+	ENSMUSG00000036819	n/a	n/a	-4	0.414141	4.63629	0.73	0.65	-0.08	-0.952086	0.62	0.83	0.97	0.55	0.78	0.93	0.21	0.59	0.88	0.45	0.71	0.92	0.45	0.81	0.97	0.46	0.75	0.93	0.63	0.79	0.92	0.44	0.7	0.88	0.67	0.87	0.99	0.46	0.76	0.95	0.52	0.74	0.92	0.54	0.84	0.97	0.26	0.52	0.77
chr8:110073551:110073752:+@chr8:110073947:110074035:+@chr8:110076177:110076337:+	ENSMUSG00000031930	Wwp2	Mus musculus adult male liver cDNA,WW domain containing E3 ubiquitin protein ligase, clone:1300010O06 product:NEDD-4-LIKE UBIQUITIN-PROTEIN LIGASE homolog [Homo sapiens], full insert sequence., RIKEN full-length enriched library	n/a	n/a	n/a	n/a	n/a	n/a	n/a	0.74	0.93	0.99	0.76	0.92	1	0.65	0.85	0.97	0.41	0.73	0.95	0.6	0.85	0.98	0.25	0.52	0.91	0.77	0.93	1	0.68	0.88	0.99	0.62	0.86	0.98	0.66	0.88	0.99	0.67	0.88	0.99	0.67	0.91	1	0.5	0.81	0.96
chr11:82721055:82721737:-@chr11:82720006|82720119:82719927:-	ENSMUSG00000020692	Nle1	Notchless gene homolog	n/a	n/a	n/a	n/a	n/a	n/a	n/a	0.36	0.66	0.89	0.3	0.51	0.74	0.08	0.32	0.64	0.22	0.65	1	n/a	n/a	n/a	0.08	0.31	0.71	0.08	0.32	0.64	0.16	0.42	0.75	0.08	0.43	0.79	0.17	0.52	0.97	0.36	0.63	0.88	0.22	0.58	0.89	0.29	0.6	0.88
chrX:72661354:72661904:-@chrX:72654885:72654952:-@chrX:72650115:72650557:-	ENSMUSG00000079529	Mtcp1	mature T-cell proliferation 1 isoform b	n/a	n/a	n/a	n/a	n/a	n/a	n/a	0.36	0.74	0.98	0.44	0.77	0.96	0.16	0.64	0.95	0.65	0.9	0.99	0.29	0.66	0.95	0.62	0.87	0.99	0.48	0.78	0.97	0.54	0.84	0.97	0.62	0.87	0.99	0.69	0.92	1	0.41	0.78	0.99	0.37	0.76	0.98	0.4	0.76	0.98
chr7:148450624:148450682:-@chr7:148450392:148450554:-	n/a	n/a	n/a	n/a	n/a	n/a	n/a	n/a	n/a	n/a	n/a	n/a	n/a	n/a	n/a	n/a	n/a	n/a	n/a	n/a	n/a	n/a	n/a	n/a	n/a	n/a	n/a	n/a	0.1	0.35	0.73	0.1	0.35	0.68	n/a	n/a	n/a	n/a	n/a	n/a	0.15	0.38	0.67	n/a	n/a	n/a	n/a	n/a	n/a
chr12:17697612:17697852:+@chr12:17774020:17774105:+@chr12:17792953:17793514:+	n/a	n/a	n/a	-9	0.707071	11.8903	0.43	0.42	-0.02	-0.816387	0.11	0.36	0.84	0.21	0.39	0.61	0.22	0.55	0.82	0.28	0.61	0.98	0.64	0.87	1	0.2	0.4	0.65	0.19	0.37	0.6	0.34	0.55	0.75	0.19	0.56	0.97	0.65	0.9	1	0.13	0.29	0.5	0.14	0.31	0.54	0.03	0.19	0.39
chr17:15650494:15650585:+@chr17:15651194:15651361:+@chr17:15652580:15652674:+	ENSMUSG00000014767	n/a	TATA box binding protein	-7	0.0707071	15.2138	0.82	0.7	-0.11	-0.464756	0.59	0.83	0.98	0.51	0.81	0.97	0.54	0.81	0.98	0.53	0.81	0.98	0.57	0.86	0.99	0.14	0.34	0.66	0.75	0.91	0.99	0.55	0.79	0.96	0.64	0.86	0.98	0.63	0.87	0.98	0.55	0.82	0.97	0.43	0.79	1	0.42	0.75	0.97
chr6:34733570:34733630|34733593:+@chr6:34735191:34735719:+	ENSMUSG00000038836	n/a	n/a	n/a	n/a	n/a	n/a	n/a	n/a	n/a	n/a	n/a	n/a	0.22	0.63	0.95	0.04	0.49	0.96	n/a	n/a	n/a	n/a	n/a	n/a	0.6	0.85	0.99	0.65	0.87	0.99	0.3	0.74	0.99	0.47	0.83	1	0.35	0.72	0.95	n/a	n/a	n/a	0.14	0.65	0.96	0.14	0.56	0.92
chr2:155755749:155756621:-@chr2:155747461|155747463:155747371:-	ENSMUSG00000005882	Uqcc	complete cds., zinc binding protein,Mus musculus unknown protein mRNA,basic FGF repressed	n/a	n/a	n/a	n/a	n/a	n/a	n/a	0.97	0.99	1	0.96	0.98	1	0.97	0.99	1	0.92	0.96	0.99	0.95	0.98	1	0.93	0.98	1	0.96	0.98	1	0.98	0.99	1	0.97	0.99	0.99	0.98	0.99	1	0.97	0.99	1	0.84	0.93	0.99	0.92	0.98	1
chr9:21156911:21156995:+@chr9:21157445:21157616:+@chr9:21158126:21159473:+	ENSMUSG00000057193	Slc44a2	solute carrier family 44	-48	2.08081	16.8281	0.23	0.1	-0.13	-2.97602	0.16	0.22	0.28	0.18	0.24	0.29	0.17	0.22	0.29	0.16	0.21	0.27	0.12	0.19	0.26	0.11	0.16	0.21	0.19	0.25	0.31	0.24	0.3	0.37	0.15	0.23	0.32	0.15	0.21	0.27	0.13	0.18	0.25	0.18	0.26	0.35	0.13	0.19	0.28
chr11:120829309:120829448:-@chr11:120826262:120826324:-@chr11:120823055:120825220:-	ENSMUSG00000025162	Csnk1d	delta isoform 2,casein kinase 1, delta isoform 1	38	0.848485	15.4733	0.25	0.55	0.29	2.40102	0.15	0.27	0.41	0.18	0.29	0.41	0.1	0.2	0.32	0.27	0.43	0.59	0.27	0.43	0.62	0.44	0.63	0.78	0.37	0.5	0.64	0.56	0.67	0.78	0.2	0.35	0.5	0.27	0.4	0.56	0.33	0.46	0.59	0.53	0.67	0.79	0.22	0.39	0.6
chr9:15122118:15122211:-@chr9:15121972|15122037:15121903:-	ENSMUSG00000046111	5830418K08Rik	MKIAA1731 protein (Fragment).	n/a	n/a	n/a	n/a	n/a	n/a	n/a	n/a	n/a	n/a	n/a	n/a	n/a	n/a	n/a	n/a	n/a	n/a	n/a	n/a	n/a	n/a	n/a	n/a	n/a	n/a	n/a	n/a	n/a	n/a	n/a	n/a	n/a	n/a	n/a	n/a	n/a	n/a	n/a	n/a	n/a	n/a	n/a	n/a	n/a	n/a
chr14:27258165:27258224:-@chr14:27249274:27249396:-@chr14:27247728:27247802:-	ENSMUSG00000021870	Slmap,mKIAA1601	alternatively spliced., complete cds,Mus musculus sarcolemmal associated protein 1 mRNA,sarcolemma associated protein	16	2.72727	18.6411	0.46	0.51	0.05	0.712013	0.37	0.52	0.69	0.45	0.62	0.8	0.13	0.24	0.4	0.39	0.58	0.85	0.48	0.71	0.94	0.44	0.59	0.77	0.56	0.71	0.85	0.29	0.4	0.53	0.45	0.57	0.71	0.46	0.57	0.7	0.48	0.68	0.88	0.75	0.91	0.99	0.82	0.95	1
chr17:24322149:24323232:-@chr17:24321326:24321343:-@chr17:24320639:24320797:-	ENSMUSG00000036473	Tbc1d24	TBC1 domain family, member 24	1	0.0505051	0.925222	0.4	0.42	0.03	1.02624	0.1	0.42	0.83	0.13	0.48	0.88	0.06	0.29	0.66	0.06	0.44	0.95	0.05	0.43	0.81	0.05	0.37	0.89	0.02	0.17	0.52	0.01	0.25	0.72	0	0.22	0.66	0.05	0.38	0.88	0.01	0.31	0.82	0.01	0.24	0.74	0.02	0.33	0.72
chr13:74631298:74631436:-@chr13:74621347:74621470:-@chr13:74620265:74620391:-	ENSMUSG00000069208	BC012278	hypothetical protein LOC235956	1	0.40404	8.98025	0.35	0.33	-0.02	0.0663634	0.15	0.35	0.58	0.06	0.22	0.47	0.17	0.48	0.88	0.18	0.3	0.43	0.28	0.5	0.76	0.15	0.31	0.56	0.11	0.19	0.28	0.07	0.15	0.26	0.12	0.19	0.27	0.16	0.23	0.32	0.08	0.23	0.53	0.14	0.31	0.49	0.03	0.1	0.23
chr6:87857367:87857509:+@chr6:87857773|87857804:87857975:+	ENSMUSG00000030058	Copg	coatomer protein complex	n/a	n/a	n/a	n/a	n/a	n/a	n/a	0.01	0.05	0.12	0	0.02	0.06	0	0.03	0.09	0	0.02	0.08	0.01	0.06	0.14	0.01	0.04	0.1	0	0.04	0.11	0.01	0.03	0.09	0	0.05	0.15	0.01	0.07	0.18	0	0.02	0.08	0	0.03	0.13	0.01	0.08	0.23
chr2:29963741:29963855:-@chr2:29963496:29963642:-	n/a	n/a	n/a	n/a	n/a	n/a	n/a	n/a	n/a	n/a	0	0.02	0.08	0.01	0.05	0.13	0	0.03	0.09	0.02	0.09	0.23	0.01	0.06	0.19	0	0.04	0.17	0	0.03	0.1	0	0.04	0.14	0.01	0.08	0.25	0.01	0.05	0.14	0	0.04	0.1	0	0.04	0.11	0	0.07	0.27
chr12:105576581:105576755:+@chr12:105578704:105579360:+@chr12:105629666:105630154:+	ENSMUSG00000058207	Serpina3k	serine (or cysteine) proteinase inhibitor	n/a	n/a	n/a	n/a	n/a	n/a	n/a	0.01	0.05	0.18	0.01	0.1	0.34	0	0.07	0.28	0	0.06	0.23	0.01	0.24	0.63	0.06	0.17	0.38	0.04	0.08	0.15	0	0.02	0.06	0	0.07	0.26	0.01	0.04	0.13	0.01	0.06	0.16	0.02	0.08	0.24	0.07	0.18	0.33
chr11:116155286:116155352:-@chr11:116154589:116154627:-@chr11:116153833:116153898:-	ENSMUSG00000020792	Exoc7	exocyst complex component 7	-10	-0.606061	9.73157	0.44	0.35	-0.09	-0.965306	0.25	0.52	0.78	0.28	0.48	0.68	0.15	0.32	0.52	0.62	0.77	0.92	0.25	0.46	0.69	0.05	0.18	0.34	0.14	0.3	0.48	0.14	0.3	0.51	0.45	0.79	0.99	0.39	0.64	0.9	0.22	0.42	0.68	0.1	0.36	0.67	0.26	0.61	0.91
chr15:76875913:76876188:+@chr15:76877438|76877461:76877561:+	ENSMUSG00000033576	Apol6,BC113126,AK144563	Adult male tongue cDNA, RIKEN full-length enriched library,Mus musculus adult male tongue cDNA, full insert sequence., clone:2310076O14 product:hypothetical Bacterial regulatory protein, LysR family containing protein	n/a	n/a	n/a	n/a	n/a	n/a	n/a	n/a	n/a	n/a	0.1	0.47	0.87	0.03	0.3	0.81	0	0.55	0.98	n/a	n/a	n/a	0.05	0.42	0.88	n/a	n/a	n/a	0.09	0.57	1	0.09	0.54	0.91	0.03	0.38	0.88	n/a	n/a	n/a	n/a	n/a	n/a	n/a	n/a	n/a
chr17:32529343:32529733:-@chr17:32528991:32529148:-	n/a	n/a	n/a	n/a	n/a	n/a	n/a	n/a	n/a	n/a	n/a	n/a	n/a	n/a	n/a	n/a	n/a	n/a	n/a	n/a	n/a	n/a	n/a	n/a	n/a	n/a	n/a	n/a	n/a	n/a	n/a	n/a	n/a	n/a	n/a	n/a	n/a	n/a	n/a	n/a	n/a	n/a	n/a	n/a	n/a	n/a	n/a	n/a	n/a
chr14:48345901:48345984:+@chr14:48346146:48346229:+@chr14:48350015:48350098:+	ENSMUSG00000021843	KNT,mKIAA0004,Ktn1	clone E6.,MKIAA0004 protein (Fragment).,kinectin 1, splice variant mKNT1,Mus musculus partial mRNA for kinectin (KNT gene)	-8	1.35354	16.1197	0.2	0.18	-0.02	-0.580255	0.14	0.2	0.28	0.13	0.19	0.27	0.13	0.21	0.3	0.16	0.21	0.28	0.11	0.17	0.25	0.3	0.38	0.46	0.3	0.36	0.42	0.24	0.31	0.38	0.48	0.59	0.69	0.3	0.35	0.41	0.17	0.27	0.38	0.21	0.29	0.4	0.19	0.3	0.43
chr11:85615287:85615454:+@chr11:85627502:85627567:+@chr11:85635524:85635614:+	ENSMUSG00000059439	Bcas3	Mus musculus 10 days embryo whole body cDNA, RIKEN full-length enriched library, clone:2610028P08 product:inferred: Mus musculus K20D4 (K20D4) mRNA, complete cds, full insert sequence.,breast carcinoma amplified sequence 3,Breast carcinoma amplified sequence 3 (Fragment).	-14	1.81818	13.3926	0.49	0.52	0.03	-1.18112	0.23	0.44	0.66	0.16	0.44	0.81	0.31	0.59	0.85	0.56	0.84	1	0.86	0.95	0.99	0.37	0.66	0.89	0.25	0.42	0.6	0.46	0.63	0.8	0.23	0.46	0.72	0.31	0.57	0.84	0.38	0.59	0.82	0.09	0.43	0.78	0.05	0.3	0.95
chr17:44219693:44219873|44219869:+@chr17:44222154:44223887:+	ENSMUSG00000023960	Enpp5	Enpp5 protein (Fragment).,ectonucleotide pyrophosphatase/phosphodiesterase	1	0.010101	0.904478	0.3	0.24	-0.07	1.09444	0.03	0.19	0.6	0.03	0.4	0.96	0.01	0.32	0.71	0	0.25	0.66	0.01	0.47	0.9	0	0.12	0.37	0.01	0.18	0.54	0.05	0.35	0.78	0	0.05	0.14	0.05	0.15	0.31	0.06	0.36	0.78	0.01	0.22	0.69	0.07	0.57	0.98
chr9:25060138:25060300:+@chr9:25071787:25071791:+@chr9:25072978:25073365:+	ENSMUSG00000001833	Sept7,mKIAA4020	Mus musculus 2 days neonate thymus thymic cells cDNA,13 days embryo lung cDNA, RIKEN full-length enriched library, clone:D430043E23 product:septin 7,cell division cycle 10 homolog, clone:E430034N22 product:septin 7, full insert sequence.	n/a	n/a	n/a	n/a	n/a	n/a	n/a	0.04	0.52	0.95	0.08	0.52	0.89	0.1	0.5	0.92	0.08	0.52	0.92	0.02	0.4	0.9	0.26	0.6	0.96	0.01	0.3	0.83	0.11	0.54	0.91	0.09	0.42	0.87	0.21	0.61	0.93	0.04	0.58	0.95	0.12	0.56	0.94	0.02	0.38	0.9
chr7:148587771:148587968|148587964:+@chr7:148588083:148588228:+	ENSMUSG00000025503	Taldo1	transaldolase 1	n/a	n/a	n/a	n/a	n/a	n/a	n/a	0.92	0.97	1	0.93	0.98	1	0.94	0.98	1	0.91	0.97	1	0.81	0.94	0.99	0.83	0.93	0.99	0.9	0.96	1	0.91	0.97	1	0.81	0.94	1	0.88	0.96	1	0.92	0.98	1	0.89	0.97	1	0.74	0.92	0.99
chrX:71613755:71614013:-@chrX:71613492:71613597:-@chrX:71612649:71613248:-	ENSMUSG00000015290	Ubl4	ubiquitin-like 4	n/a	n/a	n/a	n/a	n/a	n/a	n/a	0.96	0.99	1	0.92	0.96	0.99	0.96	0.99	1	0.95	0.99	1	0.78	0.91	0.99	0.94	0.98	1	0.96	0.99	1	0.97	0.99	1	0.96	0.98	0.99	0.95	0.97	0.99	0.91	0.95	0.98	0.91	0.98	1	0.94	0.98	1
chr4:126250380:126250591|126250552:+@chr4:126251885:126252060:+	n/a	na/a	n/a	n/a	n/a	n/a	n/a	n/a	n/a	n/a	n/a	n/a	n/a	n/a	n/a	n/a	n/a	n/a	n/a	n/a	n/a	n/a	n/a	n/a	n/a	n/a	n/a	n/a	n/a	n/a	n/a	n/a	n/a	n/a	n/a	n/a	n/a	n/a	n/a	n/a	n/a	n/a	n/a	n/a	n/a	n/a	n/a	n/a	n/a
chr16:43881326:43881081|43880942:-@chr16:43880412:43880467:-	ENSMUSG00000022704	Qtrtd1	Mus musculus 13 days embryo head cDNA, RIKEN full-length enriched library,queuine tRNA-ribosyltransferase domain, clone:3110012M05 product:similar to CDNA FLJ12960 FIS, WEAKLY SIMILAR TO QUEUINE TRNA-RIBOSYLTRANSFERASE (EC 2.4.2.29) [Homo sapiens], full insert sequence., CLONE NT2RP2005605	n/a	n/a	n/a	n/a	n/a	n/a	n/a	0.01	0.12	0.35	n/a	n/a	n/a	0.01	0.11	0.32	n/a	n/a	n/a	n/a	n/a	n/a	0	0.18	0.65	0	0.06	0.2	0	0.21	0.67	0	0.04	0.17	0	0.06	0.16	0.01	0.14	0.44	n/a	n/a	n/a	0.07	0.45	0.91
chr8:71346056:71346149:+@chr8:71348951:71349028:+@chr8:71351176:71353987:+	ENSMUSG00000031864	Ints10	integrator complex subunit 10	-10	0.272727	4.85719	0.56	0.33	-0.23	-2.11495	0.35	0.62	0.89	0.33	0.69	0.92	0.1	0.36	0.79	0.15	0.49	0.9	0.17	0.52	0.82	0.44	0.74	0.96	0.47	0.69	0.88	0.14	0.33	0.56	0.2	0.54	0.88	0.12	0.34	0.68	0.2	0.52	0.84	0.3	0.54	0.75	0.19	0.55	0.89
chr19:29326292:29326608:+@chr19:29326927:29327009:+@chr19:29336673:29336923:+	ENSMUSG00000024789	Jak2	Janus kinase 2	n/a	n/a	n/a	n/a	n/a	n/a	n/a	0.57	0.86	0.99	0.41	0.76	0.98	0.52	0.8	0.98	0.27	0.76	0.96	0.53	0.81	0.98	0.56	0.84	0.98	0.57	0.84	0.99	0.61	0.86	1	0.21	0.61	0.95	0.31	0.65	0.91	0.68	0.91	0.99	0.68	0.87	0.99	0.53	0.82	0.98
chr3:94501965:94502085:+@chr3:94503452:94503634:+@chr3:94743568:94743750:+@chr3:94743970:94744148:+	ENSMUSG00000068877	Selenbp2	selenium binding protein 2	6	0.959596	14.8392	0.45	0.44	-0.01	0.339669	0.43	0.46	0.49	0.41	0.43	0.46	0.43	0.46	0.49	0.4	0.43	0.46	0.37	0.41	0.45	0.42	0.46	0.49	0.44	0.46	0.49	0.42	0.45	0.47	0.28	0.3	0.32	0.3	0.32	0.34	0.41	0.45	0.49	0.45	0.48	0.52	0.43	0.48	0.52
chr9:110644730:110645215:-@chr9:110644423:110644537:-@chr9:110634042:110634144:-	ENSMUSG00000032492	Pthr1	parathyroid hormone receptor 1	n/a	n/a	n/a	n/a	n/a	n/a	n/a	0.01	0.36	0.9	0.01	0.15	0.42	n/a	n/a	n/a	0.01	0.39	0.9	n/a	n/a	n/a	0	0.44	0.92	0.02	0.4	0.9	0.1	0.36	0.72	0.01	0.52	0.95	0.04	0.52	0.95	0.07	0.35	0.76	n/a	n/a	n/a	n/a	n/a	n/a
chr7:134169742:134170225:-@chr7:134168818:134169668:-@chr7:134168390:134168453:-	ENSMUSG00000030678	n/a	based on BLAT search.,MYC-associated zinc finger protein,Mus musculus cDNA, strand:plus, reference:ENSEMBL:Mouse-Transcript-ENST:ENSMUST00000032916, clone:Y2G0115P08	n/a	n/a	n/a	n/a	n/a	n/a	n/a	0.97	0.99	1	0.96	0.99	1	0.96	0.99	1	0.94	0.98	1	0.82	0.95	1	0.96	0.99	1	0.96	0.99	1	0.97	0.99	1	0.87	0.96	1	0.86	0.96	1	0.97	0.99	1	0.95	0.99	1	0.95	0.99	1
chr8:94874590:94874653:-@chr8:94870811|94870817:94870683:-	ENSMUSG00000031736	AK017076	clone:4933436C20 product:hypothetical protein,Mus musculus adult male testis cDNA, RIKEN full-length enriched library	n/a	n/a	n/a	n/a	n/a	n/a	n/a	n/a	n/a	n/a	n/a	n/a	n/a	n/a	n/a	n/a	n/a	n/a	n/a	n/a	n/a	n/a	n/a	n/a	n/a	n/a	n/a	n/a	0.1	0.58	0.95	n/a	n/a	n/a	n/a	n/a	n/a	n/a	n/a	n/a	n/a	n/a	n/a	n/a	n/a	n/a
chrX:132277230:132277517:+@chrX:132278102:132278153:+@chrX:132279038:132279114:+	ENSMUSG00000043384	Gprasp1	clone:2210415K24 product:RIKEN cDNA 2210415K24 gene,G protein-coupled receptor associated sorting, full insert sequence.,Mus musculus adult male stomach cDNA, RIKEN full-length enriched library	22	0.272727	12.3057	0.53	0.68	0.15	1.76562	0.3	0.59	0.89	0.21	0.51	0.82	0.22	0.49	0.8	0.35	0.76	1	0.04	0.47	1	0.08	0.24	0.49	0.06	0.27	0.56	0.31	0.65	0.94	0	0.12	0.43	0.11	0.25	0.46	0.06	0.24	0.5	0.32	0.61	0.87	0.07	0.33	0.74
chr10:79805654:79805765:-@chr10:79805052:79805138:-	n/a	n/a	n/a	16	0.474747	8.50353	0.78	0.9	0.12	1.82574	0.74	0.86	0.96	0.66	0.78	0.9	0.6	0.7	0.81	0.67	0.83	0.95	0.83	0.93	0.99	0.59	0.71	0.84	0.55	0.66	0.78	0.7	0.78	0.88	0.78	0.88	0.96	0.72	0.85	0.96	0.64	0.75	0.86	0.75	0.91	1	0.6	0.77	0.92
chr12:82047408:82047707:+@chr12:82048298:82048368:+@chr12:82048483:82048782:+	ENSMUSG00000021134	Sfrs5	Mus musculus adult female placenta cDNA, RIKEN full-length enriched library, arginine/serine-rich 5 (SRp40, HRS),splicing factor, full insert sequence., arginine/serine-rich 5, clone:1600028A20 product:splicing factor	n/a	n/a	n/a	n/a	n/a	n/a	n/a	0.99	1	1	0.97	0.99	1	0.95	0.98	1	0.98	1	1	0.97	0.99	1	0.98	0.99	1	0.99	1	1	1	1	1	1	1	1	0.99	1	1	0.98	0.99	1	0.98	0.99	1	0.99	1	1
chr3:107817958:107817879|107817863:-@chr3:107817646:107817781:-	ENSMUSG00000058135	Gstm1	glutathione S-transferase	n/a	n/a	n/a	n/a	n/a	n/a	n/a	0.98	0.99	1	0.98	0.99	1	0.98	0.99	1	0.98	0.99	1	0.95	0.98	1	0.98	0.99	1	0.97	0.99	1	0.99	1	1	0.98	1	1	0.98	0.99	1	0.97	0.99	1	0.92	0.98	1	0.93	0.98	1
chr12:52748981:52749122:-@chr12:52744091:52744201:-@chr12:52734566:52734706:-	ENSMUSG00000020954	Strn3	calmodulin binding protein 3,striatin	56	2.08081	16.0923	0.05	0.33	0.28	3.35061	0.02	0.06	0.13	0	0.02	0.09	0	0.07	0.28	0.01	0.03	0.07	0.01	0.05	0.14	0.07	0.14	0.23	0.03	0.06	0.1	0.09	0.15	0.21	0.12	0.2	0.29	0.09	0.15	0.23	0.09	0.2	0.37	0.29	0.49	0.73	0.1	0.23	0.42
chr12:80273207:80273658:-@chr12:80267338:80267396:-@chr12:80265935:80266126:-	ENSMUSG00000021124	Vti1b	Mus musculus putative v-SNARE Vti1b mRNA, complete cds.,vesicle transport through interaction with	n/a	n/a	n/a	n/a	n/a	n/a	n/a	0.97	0.99	1	0.95	0.98	1	0.96	0.99	1	0.97	0.99	1	0.9	0.96	0.99	0.97	0.99	1	0.97	0.99	1	0.98	0.99	1	0.99	1	1	0.99	0.99	1	0.93	0.97	0.99	0.95	0.98	1	0.96	0.99	1
chr19:5415008:5415112|5415099:+@chr19:5415607:5415812:+	n/a	n/a	n/a	n/a	n/a	n/a	n/a	n/a	n/a	n/a	0.5	0.82	0.99	0.56	0.83	0.98	0.73	0.93	1	0.31	0.74	0.99	0.1	0.53	0.96	0.5	0.8	0.99	0.87	0.97	1	0.38	0.78	0.98	0.68	0.9	1	0.23	0.6	0.88	0.19	0.65	0.96	0.63	0.88	1	0.57	0.86	0.99
chr6:23271706:23271853:-@chr6:23270933:23270947:-@chr6:23264133:23264207:-	n/a	na/a	n/a	n/a	n/a	n/a	n/a	n/a	n/a	n/a	n/a	n/a	n/a	n/a	n/a	n/a	n/a	n/a	n/a	n/a	n/a	n/a	n/a	n/a	n/a	n/a	n/a	n/a	n/a	n/a	n/a	n/a	n/a	n/a	n/a	n/a	n/a	n/a	n/a	n/a	n/a	n/a	n/a	n/a	n/a	n/a	n/a	n/a	n/a
chr12:85455277:85455349:+@chr12:85462105|85462233:85462271:+	ENSMUSG00000042523	Dnalc1	axonemal dynein light chain 1	n/a	n/a	n/a	n/a	n/a	n/a	n/a	n/a	n/a	n/a	n/a	n/a	n/a	n/a	n/a	n/a	n/a	n/a	n/a	n/a	n/a	n/a	n/a	n/a	n/a	0.15	0.5	0.86	0.01	0.16	0.54	n/a	n/a	n/a	0.02	0.22	0.7	n/a	n/a	n/a	n/a	n/a	n/a	n/a	n/a	n/a
chr3:94973086:94973303:+@chr3:94973451|94973504:94973635:+	ENSMUSG00000038777	Sema6c	sema domain, and,MKIAA1869 protein (Fragment)., transmembrane domain (TM)	n/a	n/a	n/a	n/a	n/a	n/a	n/a	0.01	0.24	0.59	0.02	0.2	0.58	0.02	0.22	0.6	0.03	0.28	0.77	0.02	0.24	0.68	n/a	n/a	n/a	0.05	0.23	0.61	0.03	0.18	0.52	0	0.09	0.32	0.01	0.14	0.33	0.03	0.23	0.64	n/a	n/a	n/a	n/a	n/a	n/a
chr2:35989655:35992132:-@chr2:35982645:35982771:-@chr2:35978372:35978458:-	ENSMUSG00000026889	Rbm18	full insert sequence.,Mus musculus adult male small intestine cDNA, clone:2010004P11 product:hypothetical RNA-binding region RNP-1 (RNA recognition motif) containing protein,RNA binding motif protein 18, RIKEN full-length enriched library	n/a	n/a	n/a	n/a	n/a	n/a	n/a	0.92	0.98	1	0.94	0.98	1	0.93	0.98	1	0.93	0.98	1	0.87	0.95	0.99	0.92	0.98	1	0.97	0.99	1	0.95	0.99	1	0.95	0.99	1	0.97	0.99	1	0.96	0.99	1	0.92	0.97	1	0.9	0.97	1
chr6:91202438:91202571|91202567:+@chr6:91204435:91204615:+	ENSMUSG00000064080	Fbln2	clone:E430001A04 product:fibulin 2, full insert sequence.,Mus musculus 2 days neonate thymus thymic cells cDNA, RIKEN full-length enriched library,fibulin 2 isoform b	n/a	n/a	n/a	n/a	n/a	n/a	n/a	0.01	0.05	0.13	0	0.05	0.16	0.01	0.09	0.22	0.01	0.11	0.44	0.02	0.15	0.35	0.01	0.13	0.4	0	0.1	0.35	0	0.03	0.13	0	0.03	0.1	0	0.02	0.05	0.01	0.06	0.19	0.01	0.14	0.4	0.02	0.11	0.35
chr11:54776335:54776442:-@chr11:54765852:54765904:-@chr11:54754061:54754384:-	ENSMUSG00000020400	Tnip1	TNFAIP3 interacting protein 1	1	-0.10101	0.948097	0.11	0.2	0.1	1.16128	0.01	0.09	0.26	0.04	0.18	0.43	0	0.05	0.16	0.04	0.14	0.38	0.11	0.32	0.61	0.01	0.13	0.39	0.04	0.19	0.44	0.04	0.18	0.37	0.03	0.27	0.76	0.02	0.2	0.55	0	0.1	0.35	0.02	0.19	0.51	0.03	0.38	0.94
chr11:70730817:70731284:+@chr11:70732679:70732783:+@chr11:70734354:70734470:+	ENSMUSG00000020817	Rabep1	RAB GTPase binding effector protein 1, clone:I830042G08 product:rabaptin,Bone marrow macrophage cDNA, RIKEN full-length enriched library	-4	-0.464646	7.62149	0.75	0.69	-0.06	-0.463866	0.51	0.69	0.86	0.56	0.8	0.99	0.54	0.75	0.94	0.38	0.57	0.78	0.72	0.91	1	0.33	0.5	0.69	0.69	0.79	0.88	0.66	0.81	0.93	0.51	0.7	0.86	0.61	0.84	0.99	0.61	0.8	0.94	0.53	0.72	0.9	0.53	0.73	0.9
chr14:22444055:22444437|22444110:+@chr14:22445941:22446062:+	ENSMUSG00000021767	Myst4	MYST histone acetyltransferase monocytic, RIKEN full-length enriched library, YBF2/SAS3,Histone acetyltransferase MYST4 (EC 2.3.1.48) (EC 2.3.1.-) (MYST protein 4) (MOZ, clone:6820425G08 product:MYST histone acetyltransferase monocytic leukemia 4, full insert sequence.,12 days embryo female mullerian duct includes surrounding region cDNA, SAS2 and TIP60 protein 4) (Querkopf protein).	-8	0.363636	9.76538	0.5	0.29	-0.21	-0.856458	0.25	0.49	0.79	0.3	0.56	0.87	0.23	0.46	0.79	0.2	0.43	0.81	0.17	0.42	0.79	0.07	0.23	0.45	0.17	0.31	0.55	0.07	0.15	0.26	0.1	0.22	0.39	0.09	0.19	0.34	0.39	0.78	0.99	0.18	0.42	0.87	0.12	0.3	0.64
chr19:4111582:4111698:+@chr19:4111866:4112014:+	n/a	n/a	n/a	-2	-0.262626	1.4396	0.1	0.09	-0.02	-1.20685	0.03	0.12	0.25	0.01	0.04	0.14	0.05	0.15	0.28	0.06	0.15	0.27	0.03	0.1	0.23	0.11	0.26	0.47	0.03	0.09	0.19	0.01	0.05	0.11	0.11	0.3	0.66	0.01	0.09	0.26	0	0.03	0.1	0.03	0.1	0.21	0	0.04	0.12
chr2:176991045:176991207:-@chr2:176987532:176987586:-@chr2:176980407:176980533:-	ENSMUSG00000078870	AK078446	Mus musculus 12 days embryo male wolffian duct includes surrounding region cDNA, clone:6720473D18 product:unclassifiable, RIKEN full-length enriched library	n/a	n/a	n/a	n/a	n/a	n/a	n/a	0	0.09	0.34	0.01	0.1	0.29	0.03	0.28	0.82	0	0.06	0.21	0.03	0.34	0.87	0.01	0.23	0.75	0.01	0.09	0.42	0	0.06	0.22	0.01	0.03	0.08	0	0.01	0.04	0.01	0.14	0.5	0.03	0.21	0.63	0	0.08	0.37
chr15:63802485:63802523:-@chr15:63789140:63789222:-@chr15:63788155:63788237:-	ENSMUSG00000022378	0910001A06Rik	hypothetical protein LOC223601	-1	0.040404	0.941943	0.28	0.11	-0.17	-1.10453	0.04	0.35	0.89	0.02	0.14	0.49	0.07	0.34	0.65	0.02	0.21	0.7	0.04	0.31	0.75	0.01	0.21	0.61	0.1	0.3	0.66	0.12	0.38	0.82	0.09	0.45	0.89	0.16	0.48	0.83	0.06	0.57	0.89	0.02	0.09	0.26	0.07	0.4	0.95
chr6:48363362:48363502:+@chr6:48364055:48364150:+	n/a	n/a	n/a	-4	0.494949	15.472	0.08	0.13	0.05	-0.290522	0.05	0.1	0.18	0.03	0.07	0.12	0.04	0.07	0.11	0.08	0.13	0.2	0.06	0.19	0.41	0.12	0.2	0.32	0.19	0.28	0.4	0.14	0.26	0.42	0.36	0.61	0.85	0.23	0.35	0.5	0.03	0.06	0.11	0.17	0.29	0.45	0.06	0.13	0.24
chr9:106587326:106587278|106587260:-@chr9:106584199:106584494:-	ENSMUSG00000040813	Tex264	Mus musculus adult male heart cDNA, clone:1010001E06 product:testis expressed gene 264, RIKEN full-length enriched library, full insert sequence.,testis expressed gene 264	n/a	n/a	n/a	n/a	n/a	n/a	n/a	0.73	0.9	0.99	0.4	0.73	0.96	0.59	0.86	0.99	0.65	0.88	0.98	0.62	0.87	0.99	0.61	0.82	0.97	0.84	0.95	1	0.86	0.96	1	0.87	0.95	0.99	0.87	0.95	1	0.78	0.91	0.99	0.72	0.89	0.99	0.68	0.9	0.99
chr6:113327310:113327939:-@chr6:113326886:113326939:-@chr6:113325834:113326058:-	ENSMUSG00000048930	Tada3l	Transcriptional adapter 3-like (ADA3-like protein) (ADA3 homolog) (mADA3).	n/a	n/a	n/a	n/a	n/a	n/a	n/a	0.74	0.91	0.99	0.73	0.88	0.97	0.81	0.93	0.99	0.64	0.87	0.99	0.56	0.85	0.99	0.62	0.85	0.98	0.62	0.83	0.96	0.71	0.89	0.98	0.82	0.94	1	0.76	0.89	0.97	0.82	0.94	0.99	0.74	0.9	0.99	0.43	0.74	0.93
chr3:126470432:126470497:+@chr3:126473703:126473775:+@chr3:126474692:126474764:+@chr3:126483278:126483380:+	ENSMUSG00000053819	Camk2d,mKIAA4163	, RIKEN full-length enriched library, 11 days embryo whole body cDNA,Mus musculus 10, clone:2810011D23 product:calcium/calmodulin-dependent protein kinase II, full insert sequence., delta,calcium/calmodulin-dependent protein kinase II	-2	-0.0606061	1.53622	0.97	0.95	-0.01	-1.26245	0.92	0.98	1	0.93	0.97	1	0.89	0.95	0.99	0.95	0.98	0.99	0.9	0.96	0.99	0.98	0.99	1	0.93	0.96	0.98	0.92	0.97	0.99	0.92	0.96	0.99	0.92	0.97	0.99	0.88	0.96	1	0.91	0.97	0.99	0.86	0.95	0.99
chr7:146411900:146412260:+@chr7:146413819|146413866:146413965:+	ENSMUSG00000015980	Lrrc27	clone:1700071K18 product:weakly similar to KIAA1674 PROTEIN (FRAGMENT) [Homo sapiens],Mus musculus adult male testis cDNA, RIKEN full-length enriched library	n/a	n/a	n/a	n/a	n/a	n/a	n/a	n/a	n/a	n/a	0.59	0.84	0.99	0.17	0.53	0.96	0.05	0.2	0.48	0.15	0.56	0.9	0.39	0.74	0.97	0.55	0.82	0.98	0.61	0.87	0.99	0.52	0.77	0.92	0.17	0.52	0.89	0.48	0.8	0.98	n/a	n/a	n/a	n/a	n/a	n/a
chr17:23869304:23869791:+@chr17:23870790:23871283:+	n/a	n/a	n/a	n/a	n/a	n/a	n/a	n/a	n/a	n/a	0.38	0.62	0.86	0.61	0.82	0.96	0.11	0.25	0.48	0.5	0.81	0.99	n/a	n/a	n/a	0.75	0.92	1	0.54	0.82	0.99	0.59	0.83	0.99	0.79	0.93	0.99	0.71	0.91	1	0.18	0.34	0.57	0.72	0.91	0.99	0.8	0.93	1
chr11:21138892:21139374:+@chr11:21160291:21160328:+@chr11:21163202:21163357:+	ENSMUSG00000020128	Vps54	vacuolar protein sorting 54	-1	-0.020202	0.887395	0.17	0.22	0.05	-1.10413	0.01	0.16	0.47	0	0.21	0.56	0.02	0.14	0.37	0.03	0.44	0.92	0.03	0.51	0.98	0.05	0.16	0.36	0.02	0.3	0.92	0	0.09	0.24	0.06	0.41	0.9	0.04	0.2	0.46	0.04	0.3	0.71	0.17	0.59	0.94	0.03	0.33	0.89
chr3:90306038:90307396:-@chr3:90304422:90304436:-@chr3:90301842:90304029:-	n/a	n/a	n/a	n/a	n/a	n/a	n/a	n/a	n/a	n/a	0	0.03	0.1	0.01	0.04	0.12	0	0.02	0.08	0.01	0.04	0.11	0.01	0.05	0.13	0	0.04	0.11	0	0.01	0.04	0	0	0.02	0	0.01	0.03	0	0.01	0.02	0	0.03	0.08	0	0.1	0.31	0.01	0.07	0.19
chr17:17975051:17975207:+@chr17:17975280|17975303:17975490:+	ENSMUSG00000080316	4930546H06Rik	3 days neonate thymus cDNA, RIKEN full-length enriched library	n/a	n/a	n/a	n/a	n/a	n/a	n/a	0.05	0.5	0.99	n/a	n/a	n/a	0.12	0.46	0.9	0	0.33	0.88	n/a	n/a	n/a	0.36	0.71	0.96	0.05	0.5	0.97	0.24	0.58	0.87	n/a	n/a	n/a	0.06	0.46	0.94	0.12	0.51	0.94	n/a	n/a	n/a	n/a	n/a	n/a
chr11:44434669:44434851|44434732:+@chr11:44435423:44435673:+	ENSMUSG00000057098	EBF,Ebf1	Mus musculus 13 days embryo forelimb cDNA,early B-cell factor 1, full insert sequence., clone:5930435O04 product:early B-cell factor, RIKEN full-length enriched library	n/a	n/a	n/a	n/a	n/a	n/a	n/a	0.03	0.1	0.26	0.04	0.19	0.44	0.09	0.32	0.66	0.11	0.31	0.61	n/a	n/a	n/a	n/a	n/a	n/a	0.03	0.18	0.39	0.07	0.24	0.46	0.04	0.21	0.55	0.14	0.38	0.66	0.05	0.25	0.63	0.01	0.09	0.28	0.02	0.15	0.52
chr4:109052472:109052634:+@chr4:109055390:109055571:+@chr4:109057924:109060422:+	ENSMUSG00000028552	Eps15	epidermal growth factor receptor pathway	5	-0.464646	4.91198	0.93	0.95	0.02	1.11251	0.83	0.94	1	0.76	0.92	0.99	0.76	0.92	1	0.76	0.91	0.99	0.81	0.94	1	0.61	0.79	0.96	0.66	0.85	0.99	0.84	0.94	1	0.46	0.65	0.87	0.69	0.86	0.99	0.83	0.95	1	0.83	0.94	0.99	0.77	0.92	1
chr4:124360479:124360592:-@chr4:124359657:124359750:-	n/a	n/a	n/a	-6	1.07071	18.9402	0.04	0.05	0.01	-0.373317	0.03	0.05	0.08	0.02	0.04	0.09	0.01	0.04	0.08	0.02	0.04	0.06	0	0.01	0.02	0.03	0.07	0.12	0.02	0.03	0.05	0.04	0.06	0.08	0.13	0.18	0.26	0.12	0.18	0.27	0.01	0.03	0.06	0	0	0.01	0.01	0.02	0.04
chr15:25870528:25870705:+@chr15:25870881:25870998:+@chr15:25893979:25894109:+	ENSMUSG00000022270	n/a	n/a	n/a	n/a	n/a	n/a	n/a	n/a	n/a	0.96	0.99	1	0.91	0.97	1	0.94	0.98	1	0.76	0.9	0.98	0.87	0.96	1	0.92	0.98	1	0.88	0.96	1	0.93	0.98	1	0.84	0.94	0.99	0.96	0.98	1	0.88	0.96	1	0.76	0.92	0.99	0.68	0.89	0.98
chr10:57881006:57881222:+@chr10:57881395:57881583:+@chr10:57884202:57887454:+	n/a	n/a	n/a	-18	2.36364	18.6366	0.57	0.4	-0.17	-1.09267	0.49	0.61	0.72	0.43	0.55	0.67	0.41	0.54	0.69	0.3	0.41	0.53	0.34	0.48	0.63	0.11	0.15	0.21	0.28	0.35	0.43	0.26	0.35	0.45	0.15	0.21	0.28	0.25	0.32	0.4	0.11	0.21	0.33	0.24	0.34	0.46	0.16	0.26	0.39
chr17:34720774:34720949:+@chr17:34721357|34721402:34721576:+	ENSMUSG00000015468	Notch4,IAP	Notch gene homolog 4, partial cds.,Mus musculus mammary gland RCB-0526 Jyg-MC(A) cDNA, RIKEN full-length enriched library, clone:G830026E19 product:Warning: possibly chimeric clone, full insert sequence.,Mus musculus mRNA for Truncated Notch4/int3 Oncoprotein:R2	n/a	n/a	n/a	n/a	n/a	n/a	n/a	0.74	0.9	0.99	0.68	0.87	0.99	0.68	0.89	1	0.35	0.68	0.9	0.2	0.72	0.96	0.66	0.87	0.98	0.57	0.8	0.96	0.57	0.87	0.99	0.25	0.68	0.96	0.25	0.55	0.91	0.65	0.89	0.99	0.58	0.85	0.99	0.51	0.84	0.99
chr5:121876736:121876835:+@chr5:121879342:121879470:+@chr5:121880614:121880765:+	ENSMUSG00000042719	C330023M02Rik	clone:D230040L20 product:hypothetical TPR repeat containing protein, RIKEN full-length enriched library,C330023M02Rik protein (Fragment)., full insert sequence.,12 days embryo eyeball cDNA,hypothetical protein LOC231713	4	-0.10101	9.137	0.1	0.17	0.08	0.448836	0.03	0.11	0.26	0	0.08	0.28	0.03	0.1	0.27	0.2	0.47	0.83	0	0.1	0.33	0.02	0.1	0.24	0.01	0.1	0.25	0.05	0.15	0.3	0.04	0.16	0.42	0.01	0.08	0.29	0.3	0.46	0.65	0.07	0.2	0.42	0.04	0.15	0.35
chr3:95294745:95295092:+@chr3:95297515:95297517:+@chr3:95297623:95297782:+	n/a	n/a	n/a	-3	0.0909091	2.19775	0.41	0.36	-0.05	-1.40639	0.02	0.33	0.82	0.26	0.72	0.96	0.01	0.19	0.53	0.08	0.43	0.97	0.03	0.46	0.97	0.1	0.5	0.93	0.04	0.25	0.63	0.12	0.47	0.83	0.01	0.19	0.53	0.03	0.15	0.45	0.09	0.41	0.78	0.01	0.09	0.3	0.03	0.48	0.91
chr4:53029921:53030079:+@chr4:53033054:53033203:+@chr4:53033983:53034069:+	ENSMUSG00000015247	Nipsnap3a	nipsnap homolog 3A	1	-0.030303	0.915131	0.91	0.9	0	1.12585	0.81	0.94	1	0.73	0.89	1	0.7	0.89	0.99	0.69	0.89	0.98	0.74	0.92	0.99	0.6	0.84	0.97	0.38	0.63	0.85	0.44	0.7	0.93	0.51	0.79	0.99	0.45	0.73	0.96	0.71	0.9	0.99	0.62	0.86	0.99	0.44	0.75	0.98
chr1:165818337:165818436:+@chr1:165842203:165842268:+@chr1:165845856:165847240:+	ENSMUSG00000026585	Kifap3	kinesin-associated protein 3	-35	-0.484848	12.558	0.6	0.16	-0.44	-2.74845	0.22	0.55	0.92	0.34	0.58	0.83	0.45	0.67	0.87	0.16	0.35	0.66	0.3	0.58	0.84	0.12	0.3	0.54	0.3	0.46	0.65	0.18	0.39	0.66	0.11	0.26	0.43	0.12	0.31	0.83	0.4	0.65	0.9	0.16	0.45	0.8	0.01	0.17	0.52
chr15:76455564:76455635:-@chr15:76455022:76455050:-@chr15:76454488:76454915:-	ENSMUSG00000062381	Vps28	18-day embryo whole body cDNA,vacuolar protein sorting 28, clone:1110008G16 product:VACUOLAR SORTING PROTEIN 28 homolog., RIKEN full-length enriched library	-8	0.191919	6.55309	0.98	0.85	-0.13	-1.25009	0.95	0.98	1	0.92	0.97	1	0.94	0.98	1	0.9	0.97	1	0.85	0.95	1	0.85	0.95	1	0.93	0.98	1	0.92	0.98	1	0.78	0.92	1	0.9	0.96	1	0.93	0.98	1	0.68	0.89	1	0.78	0.92	0.99
chr6:31235003:31235120:+@chr6:31278289:31278389:+@chr6:31285991:31286062:+	n/a	n/a	n/a	n/a	n/a	n/a	n/a	n/a	n/a	n/a	0.54	0.77	0.97	0.42	0.64	0.88	0.45	0.73	0.94	0.4	0.61	0.84	0.38	0.7	0.94	0.32	0.56	0.89	0.76	0.9	1	0.56	0.81	0.96	0.61	0.84	0.98	0.43	0.69	0.95	0.25	0.51	0.84	0.39	0.7	0.93	0.27	0.66	0.97
chr11:80208892:80209075|80208987:+@chr11:80209294:80209377:+	n/a	n/a	n/a	-8	-1.64646	13.7263	0.94	0.81	-0.13	-0.462874	0.83	0.94	0.99	0.8	0.93	1	0.86	0.95	1	0.59	0.81	0.98	0.74	0.89	0.99	0.51	0.75	0.96	0.36	0.51	0.72	0.43	0.63	0.86	0.76	0.92	1	0.92	0.97	1	0.84	0.94	1	0.81	0.93	0.99	0.64	0.86	1
chr12:105187257:105187527:-@chr12:105186224:105186374:-@chr12:105134215:105134365:-@chr12:104966088:104966643:-	ENSMUSG00000072849	Serpina1e	serine (or cysteine) proteinase inhibitor	2	0.111111	1.56275	0.19	0.3	0.11	1.20869	0.04	0.12	0.23	0.08	0.21	0.39	0.09	0.25	0.5	0.24	0.45	0.71	0.19	0.43	0.68	0.17	0.38	0.63	0.1	0.22	0.4	0.06	0.23	0.47	0.06	0.4	0.81	0.04	0.55	0.98	0.06	0.3	0.6	0.25	0.4	0.54	0.15	0.47	0.81
chr7:74396543:74396730:-@chr7:74389407:74389430:-@chr7:74385200:74385326:-	ENSMUSG00000030557	Mef2a	Myocyte enhancer factor 2A.	-34	-0.69697	15.1454	0.81	0.5	-0.3	-2.19889	0.69	0.79	0.89	0.68	0.81	0.91	0.7	0.82	0.92	0.58	0.72	0.84	0.36	0.48	0.6	0.63	0.76	0.86	0.63	0.73	0.83	0.53	0.65	0.76	0.43	0.55	0.68	0.4	0.51	0.65	0.58	0.75	0.88	0.38	0.54	0.69	0.46	0.71	0.91
chr10:76521850:76521923:-@chr10:76521572|76521575:76521444:-	ENSMUSG00000001435	Col18a1	Collagen alpha-1(XVIII) chain precursor [Contains: Endostatin].	n/a	n/a	n/a	n/a	n/a	n/a	n/a	0.29	0.74	1	0.15	0.63	1	0.07	0.51	0.88	n/a	n/a	n/a	n/a	n/a	n/a	n/a	n/a	n/a	n/a	n/a	n/a	0.07	0.51	0.92	n/a	n/a	n/a	n/a	n/a	n/a	0.5	0.77	0.98	n/a	n/a	n/a	n/a	n/a	n/a
chr5:115395795:115395837|115395833:+@chr5:115396027:115396215:+	ENSMUSG00000029559	2210016L21Rik	hypothetical protein LOC72357	n/a	n/a	n/a	n/a	n/a	n/a	n/a	0.75	0.93	1	0.74	0.91	1	0.81	0.94	1	0.5	0.83	1	n/a	n/a	n/a	0.5	0.81	0.97	0.85	0.95	1	0.78	0.93	1	0.24	0.68	0.97	0.47	0.81	0.97	0.82	0.94	1	0.76	0.91	0.99	0.75	0.91	0.99
chr15:76541068:76541266:+@chr15:76541394:76541513:+@chr15:76543297:76544415:+	n/a	n/a	n/a	n/a	n/a	n/a	n/a	n/a	n/a	n/a	0.15	0.37	0.69	0.11	0.34	0.72	0.35	0.66	0.9	0.02	0.15	0.42	0.01	0.34	0.81	0.28	0.61	0.91	0.13	0.31	0.55	0.45	0.74	0.98	0.43	0.73	0.99	0.41	0.7	0.97	0.23	0.44	0.74	0.23	0.54	0.89	0.04	0.33	0.87
chr10:127687024:127687166:+@chr10:127687341|127687344:127687518:+	ENSMUSG00000039994	Timeless	timeless homolog	2	-0.0808081	3.38349	0.67	0.66	-0.01	0.614988	0.35	0.69	0.92	0.15	0.62	0.94	0.36	0.71	0.94	0.27	0.57	0.86	0.14	0.5	0.89	0.18	0.56	0.93	0.58	0.78	0.92	0.59	0.8	0.96	0.25	0.71	0.98	0.32	0.72	0.98	0.46	0.72	0.97	0.4	0.62	0.85	0.33	0.69	0.92
chr1:36748327:36748534:+@chr1:36749056|36749103:36749129:+	ENSMUSG00000061518	LOC100040340	hypothetical protein LOC100040340	n/a	n/a	n/a	n/a	n/a	n/a	n/a	1	1	1	1	1	1	1	1	1	1	1	1	0.99	1	1	0.99	1	1	1	1	1	1	1	1	1	1	1	1	1	1	1	1	1	0.98	0.99	1	0.96	0.99	1
chr8:81698087:81699869:+@chr8:81702789|81702807:81702978:+	ENSMUSG00000071064	D630040G17Rik	clone:D630040G17 product:hypothetical Immunoglobulin and major histocompatibility complex domain/Cytochrome c family heme-binding site/Zinc finger, C2H2 type containing protein, RIKEN full-length enriched library,hypothetical protein LOC622675, full insert sequence.,Mus musculus 0 day neonate kidney cDNA	n/a	n/a	n/a	n/a	n/a	n/a	n/a	0.34	0.63	0.89	0.14	0.44	0.83	0	0.19	0.51	0.01	0.11	0.36	0.02	0.22	0.67	0.33	0.63	0.86	0.11	0.36	0.69	0.02	0.31	0.73	0.33	0.57	0.88	0.2	0.44	0.76	0.39	0.73	0.95	0.21	0.73	0.93	n/a	n/a	n/a
chr3:90193094:90193860:-@chr3:90192612:90192821:-@chr3:90192250:90192408:-	ENSMUSG00000027932	Slc27a3	solute carrier family 27 member 3	n/a	n/a	n/a	n/a	n/a	n/a	n/a	0.49	0.81	0.98	n/a	n/a	n/a	n/a	n/a	n/a	0.44	0.8	0.97	n/a	n/a	n/a	0.58	0.87	0.99	0.52	0.82	0.99	0.19	0.57	0.9	0.32	0.69	0.96	0.1	0.43	0.81	0.68	0.88	0.98	0.4	0.8	0.99	n/a	n/a	n/a
chr12:72038840:72039018:+@chr12:72041785:72041857:+@chr12:72043246:72043328:+	ENSMUSG00000021076	Actr10	ARP10 actin-related protein 10 homolog	n/a	n/a	n/a	n/a	n/a	n/a	n/a	0.83	0.96	1	0.87	0.96	1	0.81	0.93	1	0.85	0.95	1	0.7	0.9	0.99	0.93	0.98	1	0.92	0.98	1	0.91	0.97	1	0.96	0.99	1	0.97	0.99	1	0.84	0.95	0.99	0.78	0.92	0.99	0.78	0.92	0.99
chr5:143521813:143521567|143521453:-@chr5:143515869:143517399:-	ENSMUSG00000039477	Zfp469	zinc finger protein 469	n/a	n/a	n/a	n/a	n/a	n/a	n/a	0.8	0.92	1	0.68	0.87	0.97	0.7	0.91	0.99	0.56	0.84	0.98	0.8	0.92	0.99	0.54	0.85	1	0.83	0.94	0.99	0.77	0.93	0.99	0.85	0.96	1	0.87	0.96	1	0.74	0.92	1	0.78	0.94	1	0.59	0.86	0.99
chr3:116210669:116210769:-@chr3:116209896|116209911:116209753:-	ENSMUSG00000000339	Rtcd1,BC051062	RIKEN full-length enriched library,Mus musculus adult male kidney cDNA,RNA terminal phosphate cyclase domain 1, full insert sequence.,Mus musculus RNA terminal phosphate cyclase domain 1, mRNA (cDNA clone IMAGE:5359937)., clone:0610011H17 product:RNA 3'-TERMINAL PHOSPHATE CYCLASE (EC 6.5.1.4) (RNA-3'-PHOSPHATE CYCLASE) (RNA CYCLASE) homolog [Homo sapiens]	n/a	n/a	n/a	n/a	n/a	n/a	n/a	0	0.14	0.42	0.01	0.13	0.5	0.02	0.17	0.52	0.03	0.25	0.57	0.03	0.25	0.75	0.02	0.15	0.38	0.01	0.1	0.26	0.02	0.12	0.37	0.06	0.37	0.82	0.01	0.21	0.57	0.01	0.12	0.38	0.03	0.33	0.87	0.01	0.11	0.38
chr9:13625971:13626127:-@chr9:13623462|13623482:13623303:-	ENSMUSG00000031922	Cep57	translokin,Centrosomal protein of 57 kDa (Cep57 protein) (Testis-specific protein 57) (Translokin).	n/a	n/a	n/a	n/a	n/a	n/a	n/a	0.23	0.7	0.98	n/a	n/a	n/a	n/a	n/a	n/a	0.18	0.53	0.88	0.12	0.5	0.87	0.73	0.91	1	0.04	0.33	0.8	0.17	0.57	0.93	0.1	0.61	0.97	0.08	0.42	0.84	n/a	n/a	n/a	0.12	0.43	0.86	0.07	0.53	0.98
chr1:137738478:137738488:+@chr1:137738592:137738603:+@chr1:137740362:137740391:+	ENSMUSG00000026414	Tnnt2	RIKEN full-length enriched library,Mus musculus adult male kidney cDNA, full insert sequence., cardiac,troponin T2, clone:0610008J17 product:Warning: possibly chimeric clone	n/a	n/a	n/a	n/a	n/a	n/a	n/a	0.27	0.68	0.97	0.19	0.59	0.96	0.17	0.58	1	0.35	0.72	0.95	0.23	0.66	0.93	0.26	0.69	0.99	0.06	0.5	0.98	0.01	0.4	0.79	0.72	0.93	1	0.82	0.94	1	0.5	0.78	0.99	0.34	0.69	0.98	0.57	0.81	0.97
chr8:86258251:86258201|86258195:-@chr8:86257908:86258024:-	ENSMUSG00000002885	Cd97	CD97 antigen	n/a	n/a	n/a	n/a	n/a	n/a	n/a	0.73	0.92	0.99	0.44	0.8	0.97	0.65	0.86	0.99	0.73	0.91	0.99	0.71	0.9	0.99	0.38	0.65	0.86	0.52	0.78	0.95	0.34	0.64	0.9	0.64	0.84	0.98	0.65	0.84	0.97	0.38	0.62	0.87	0.61	0.85	0.97	0.74	0.91	0.99
chr10:120414840:120416388:-@chr10:120389274:120389311:-@chr10:120386353:120386419:-	ENSMUSG00000048661	Lemd3	LEM domain containing 3	4	-0.161616	3.87613	0.87	0.87	0.01	1.07365	0.63	0.9	0.99	0.61	0.84	0.99	0.61	0.86	1	0.41	0.76	0.98	0.54	0.86	0.98	0.03	0.29	0.88	0.63	0.87	0.98	0.61	0.89	0.99	0.76	0.92	0.99	0.88	0.97	1	0.16	0.59	0.97	0.57	0.82	0.96	0.39	0.76	0.98
chr15:89259145:89259258:-@chr15:89258842:89258975:-	n/a	n/a	n/a	-6	-0.808081	13.5271	0.37	0.37	0.01	-0.383815	0.26	0.36	0.48	0.22	0.31	0.4	0.31	0.43	0.57	0.42	0.55	0.69	0.18	0.3	0.44	0.26	0.36	0.47	0.2	0.3	0.41	0.38	0.5	0.65	0.62	0.79	0.95	0.41	0.53	0.68	0.27	0.38	0.5	0.21	0.32	0.48	0.2	0.34	0.54
chr11:118280286:118280453:-@chr11:118278888:118278968:-@chr11:118271780:118272825:-	ENSMUSG00000025575	Cant1	calcium activated nucleotidase 1	n/a	n/a	n/a	n/a	n/a	n/a	n/a	0.66	0.89	1	0.76	0.92	0.99	0.81	0.93	0.99	0.72	0.89	0.98	0.38	0.69	0.95	0.57	0.83	0.98	0.66	0.89	1	0.7	0.89	0.98	0.42	0.74	0.94	0.74	0.93	1	0.81	0.93	0.99	0.59	0.81	0.96	0.55	0.83	0.99
chr14:31615718:31615857|31615856:+@chr14:31623482:31623591:+	ENSMUSG00000006527	Sfmbt1	Scm-like with four mbt domains 1	n/a	n/a	n/a	n/a	n/a	n/a	n/a	0.26	0.71	0.98	0.26	0.7	0.97	n/a	n/a	n/a	0.57	0.84	0.99	0.41	0.78	0.98	0.02	0.37	0.92	0.45	0.8	0.99	0.26	0.68	0.97	0.18	0.61	0.95	0.34	0.79	0.99	0.15	0.53	0.86	0.16	0.54	0.93	0.41	0.78	0.99
chr3:55320795:55320908:+@chr3:55325772:55325845:+@chr3:55337492:55342990:+	ENSMUSG00000027797	Dcamkl1,Dclk1,mKIAA0369	full insert sequence., clone:C030016N17 product:double cortin and calcium/calmodulin- dependent protein kinase-like 1,Adult male corpus striatum cDNA,doublecortin-like kinase 1, RIKEN full-length enriched library	n/a	n/a	n/a	n/a	n/a	n/a	n/a	0.1	0.58	0.99	0.09	0.5	0.96	n/a	n/a	n/a	n/a	n/a	n/a	0.03	0.4	0.78	0.04	0.56	0.92	0.04	0.47	0.98	0.09	0.44	0.94	0.07	0.44	0.91	0.05	0.48	0.88	0.05	0.38	0.76	0.13	0.61	0.96	n/a	n/a	n/a
chr19:56621127:56622642:-@chr19:56619397|56620136:56618505:-	ENSMUSG00000025077	AK012900,Dclre1a	PSO2 homolog, RIKEN full-length enriched library, 11 days embryo whole body cDNA,Mus musculus 10,DNA cross-link repair 1A, clone:2810043H12 product:DNA cross-link repair 1A, full insert sequence., PSO2 homolog (S. cerevisiae)	-4	0.40404	5.29326	0.89	0.84	-0.05	-0.83201	0.82	0.93	1	0.63	0.85	0.98	0.68	0.89	0.99	0.81	0.94	1	0.6	0.85	0.99	0.83	0.94	1	0.75	0.9	0.98	0.33	0.55	0.91	0.75	0.93	0.99	0.69	0.87	0.98	0.56	0.84	1	0.63	0.86	0.99	0.51	0.79	0.99
chr2:32255570:32255628:+@chr2:32255910|32255923:32256072:+	ENSMUSG00000026820	Ptges2	prostaglandin E synthase 2	n/a	n/a	n/a	n/a	n/a	n/a	n/a	0	0.03	0.08	0	0.03	0.12	0	0.03	0.08	0	0.02	0.09	0.01	0.09	0.3	0.01	0.05	0.14	0	0.01	0.04	0	0.04	0.12	0	0.04	0.13	0	0.03	0.12	0	0.02	0.06	0.01	0.05	0.14	0.01	0.06	0.19
chr8:121868836:121868902:+@chr8:121869513|121869516:121869633:+	ENSMUSG00000031839	Hsbp1	heat shock factor binding protein 1	n/a	n/a	n/a	n/a	n/a	n/a	n/a	0.96	0.98	1	0.95	0.99	1	0.95	0.98	1	0.95	0.99	1	0.93	0.98	1	0.94	0.98	1	0.98	0.99	1	0.92	0.97	1	0.93	0.98	1	0.94	0.98	1	0.95	0.98	1	0.88	0.96	1	0.9	0.96	1
chr4:120215315:120215370:-@chr4:120215136:120215232:-	n/a	n/a	n/a	n/a	n/a	n/a	n/a	n/a	n/a	n/a	0	0.02	0.05	0.01	0.03	0.07	0.01	0.03	0.06	0	0.01	0.03	0.01	0.03	0.06	0	0.03	0.08	0.01	0.03	0.07	0	0.02	0.06	0.01	0.08	0.19	0.01	0.05	0.12	0	0.02	0.06	0.01	0.05	0.11	0.02	0.06	0.13
chr1:40159234:40159382:+@chr1:40162109:40162367:+@chr1:40168800:40168980:+	ENSMUSG00000026073	Il1r2	interleukin 1 receptor	n/a	n/a	n/a	n/a	n/a	n/a	n/a	n/a	n/a	n/a	n/a	n/a	n/a	n/a	n/a	n/a	n/a	n/a	n/a	n/a	n/a	n/a	n/a	n/a	n/a	n/a	n/a	n/a	n/a	n/a	n/a	n/a	n/a	n/a	n/a	n/a	n/a	n/a	n/a	n/a	n/a	n/a	n/a	n/a	n/a	n/a
chr5:67652046:67652272:+@chr5:67654969:67655063:+@chr5:67655509:67655849:+	ENSMUSG00000037720	Tmem33	11 days embryo whole body cDNA, RIKEN full-length enriched library, clone:2700052H22 product:2700052H22RIK PROTEIN, full insert sequence.,transmembrane protein 33 isoform 1,transmembrane protein 33 isoform 2	n/a	n/a	n/a	n/a	n/a	n/a	n/a	0.88	0.96	0.99	0.88	0.96	0.99	0.92	0.97	1	0.89	0.97	1	0.71	0.89	0.98	0.89	0.96	1	0.79	0.93	1	0.81	0.93	0.99	0.83	0.95	0.99	0.87	0.95	0.99	0.79	0.92	0.99	0.81	0.93	1	0.83	0.93	0.99
chr5:138176068:138177582:-@chr5:138175150|138175153:138174944:-	ENSMUSG00000045348	6430598A04Rik	RIKEN cDNA 6430598A04 gene	n/a	n/a	n/a	n/a	n/a	n/a	n/a	0.15	0.54	0.98	0.06	0.42	0.82	0.02	0.22	0.59	0.02	0.34	0.96	0.08	0.4	0.86	0.09	0.52	0.97	0.05	0.64	0.98	0.02	0.26	0.83	n/a	n/a	n/a	0.12	0.52	0.92	0.05	0.33	0.81	n/a	n/a	n/a	0.01	0.35	0.89
chr16:20733507:20733707:+@chr16:20734080:20734209:+@chr16:20734346:20734654:+	ENSMUSG00000006958	Chrd	chordin	n/a	n/a	n/a	n/a	n/a	n/a	n/a	n/a	n/a	n/a	n/a	n/a	n/a	n/a	n/a	n/a	n/a	n/a	n/a	n/a	n/a	n/a	n/a	n/a	n/a	0.47	0.75	0.97	n/a	n/a	n/a	n/a	n/a	n/a	n/a	n/a	n/a	n/a	n/a	n/a	n/a	n/a	n/a	n/a	n/a	n/a
chrX:71516199:71516363:+@chrX:71516700|71516999:71517057:+	ENSMUSG00000008682	Rpl10	ribosomal protein 10	43	1.62626	21.5222	0.03	0.07	0.04	1.92238	0.01	0.01	0.02	0.03	0.04	0.06	0.01	0.03	0.04	0.02	0.03	0.04	0.06	0.09	0.13	0.02	0.03	0.04	0.01	0.02	0.03	0	0.01	0.02	0.03	0.04	0.06	0.02	0.02	0.03	0.04	0.06	0.08	0.13	0.17	0.23	0.1	0.14	0.19
chr8:123629474:123629587:-@chr8:123628405|123628458:123628292:-	ENSMUSG00000031816	Mthfsd	full insert sequence.,Mus musculus 2 days neonate thymus thymic cells cDNA, RIKEN full-length enriched library, clone:C920004D05 product:similar to THYRO1001661 PROTEIN [Homo sapiens],methenyltetrahydrofolate synthetase domain	n/a	n/a	n/a	n/a	n/a	n/a	n/a	0.05	0.29	0.75	0.01	0.21	0.86	0.06	0.3	0.83	0.11	0.47	0.9	0.18	0.55	0.91	0.02	0.26	0.79	0.01	0.09	0.38	0.07	0.34	0.97	0.01	0.33	0.96	0.03	0.27	0.69	0.11	0.45	0.84	0.09	0.49	0.97	n/a	n/a	n/a
chr9:120480630:120481314:+@chr9:120481885:120481979:+@chr9:120482693:120482792:+	ENSMUSG00000025794	Rpl14	ribosomal protein L14	n/a	n/a	n/a	n/a	n/a	n/a	n/a	0.99	1	1	0.99	1	1	1	1	1	1	1	1	0.99	1	1	1	1	1	1	1	1	1	1	1	1	1	1	1	1	1	1	1	1	0.99	1	1	0.99	1	1
chr16:57138143:57138291:+@chr16:57140692:57140899:+@chr16:57142834:57142968:+	ENSMUSG00000022752	Tomm70a	translocase of outer mitochondrial membrane 70	2	-0.333333	1.4771	0.88	0.96	0.08	1.57967	0.74	0.9	0.98	0.75	0.9	0.98	0.64	0.83	0.99	0.74	0.9	0.99	0.63	0.83	0.98	0.65	0.83	0.99	0.89	0.96	1	0.85	0.95	0.99	0.61	0.76	0.91	0.7	0.83	0.98	0.71	0.88	0.99	0.92	0.98	1	0.8	0.93	0.99
chr2:34033697:34033862:-@chr2:34032269:34032381:-@chr2:34031385:34031474:-	ENSMUSG00000038718	Pbx3,PBX3	complete cds.,Pre-B-cell leukemia transcription factor 3 (Homeobox protein PBX3).,Mus musculus transcription factor PBX3a (PBX3) mRNA	n/a	n/a	n/a	n/a	n/a	n/a	n/a	0.32	0.65	0.9	0.39	0.74	0.98	n/a	n/a	n/a	0.23	0.63	0.92	n/a	n/a	n/a	0.66	0.89	0.99	0.34	0.67	1	0.07	0.26	0.62	n/a	n/a	n/a	0.04	0.23	0.52	n/a	n/a	n/a	n/a	n/a	n/a	n/a	n/a	n/a
chr10:80653343:80653391:+@chr10:80653787:80653813:+@chr10:80654504:80655406:+	ENSMUSG00000034974	Dapk3	Mus musculus mRNA for ZIP-kinase, complete cds.,death-associated kinase 3	-12	1.07071	9.3455	0.95	0.85	-0.1	-1.39861	0.87	0.96	1	0.87	0.95	1	0.77	0.94	0.99	0.9	0.97	1	0.55	0.81	0.97	0.89	0.96	1	0.89	0.96	0.99	0.85	0.96	1	0.58	0.86	0.99	0.84	0.94	0.99	0.89	0.97	1	0.87	0.95	1	0.73	0.91	0.98
chr9:21730801:21730715|21730693:-@chr9:21730435:21730598:-	ENSMUSG00000040883	BC010787	hypothetical protein LOC235043	-15	-0.747475	12.1267	0.99	0.74	-0.24	-1.1753	0.93	0.99	1	0.94	0.98	1	0.96	0.99	1	0.91	0.97	1	0.63	0.86	0.99	0.87	0.97	1	0.94	0.98	1	0.93	0.98	1	0.81	0.93	1	0.9	0.97	1	0.95	0.98	1	0.86	0.95	0.99	0.82	0.93	1
chrX:102264950:102265038:-@chrX:102264453:102264485:-@chrX:102263254:102263967:-	n/a	n/a	n/a	n/a	n/a	n/a	n/a	n/a	n/a	n/a	n/a	n/a	n/a	n/a	n/a	n/a	n/a	n/a	n/a	n/a	n/a	n/a	n/a	n/a	n/a	n/a	n/a	n/a	0	0.1	0.34	0.05	0.43	0.89	0.04	0.22	0.51	0.05	0.23	0.59	n/a	n/a	n/a	n/a	n/a	n/a	n/a	n/a	n/a
chr5:145893728:145893849:-@chr5:145892383|145892385:145892234:-	ENSMUSG00000029623	Pdap1	PDGFA associated protein 1	n/a	n/a	n/a	n/a	n/a	n/a	n/a	0.92	0.97	1	0.94	0.98	1	0.92	0.98	1	0.9	0.97	1	0.88	0.97	1	0.91	0.98	1	0.95	0.98	1	0.96	0.98	1	0.96	0.99	1	0.95	0.99	1	0.96	0.99	1	0.93	0.98	1	0.94	0.98	1
chr15:98355143:98354992|98354890:-@chr15:98349498:98350856:-	ENSMUSG00000022992	AK217757,2310037I24Rik	based on BLAT search., reference:ENSEMBL:Mouse-Transcript-ENST:ENSMUST00000066911,Mus musculus cDNA,2310037I24Rik protein., strand:plus, clone:Y1G0137D22	-4	1.77778	17.6077	0.94	0.78	-0.16	-0.328139	0.85	0.94	0.99	0.89	0.96	0.99	0.84	0.91	0.96	0.79	0.9	0.99	0.58	0.8	0.96	0.41	0.55	0.68	0.71	0.81	0.9	0.73	0.86	0.95	0.47	0.65	0.84	0.44	0.62	0.81	0.81	0.89	0.96	0.83	0.93	0.99	0.79	0.92	0.99
chr11:120481477:120481583:-@chr11:120479686:120480363:-	n/a	n/a	n/a	-9	-2.68687	16.8503	0.09	0.13	0.05	-0.37466	0.03	0.06	0.1	0.07	0.11	0.16	0.06	0.09	0.14	0.05	0.09	0.13	0.07	0.13	0.19	0.21	0.29	0.4	0.12	0.18	0.25	0.09	0.13	0.18	0.21	0.3	0.42	0.32	0.46	0.61	0.07	0.1	0.15	0.08	0.13	0.2	0.05	0.1	0.16
chr16:20617699:20617982:+@chr16:20630425:20630511:+@chr16:20630854:20630983:+	ENSMUSG00000022842	Ece2	endothelin converting enzyme 2 isoform b,Ece2 protein (Fragment).	n/a	n/a	n/a	n/a	n/a	n/a	n/a	0.02	0.15	0.56	0.01	0.36	0.77	0.09	0.46	0.93	0.15	0.42	0.75	0.05	0.3	0.81	0.04	0.33	0.77	0.02	0.21	0.62	0.03	0.22	0.56	0.16	0.47	0.9	0.05	0.32	0.65	0.09	0.46	0.89	0.02	0.18	0.52	0.02	0.18	0.6
chr6:124997497:124997605:+@chr6:124997814:124997958:+	n/a	n/a	n/a	12	-1.0303	9.28282	0.14	0.3	0.16	1.4037	0.09	0.16	0.27	0.05	0.1	0.18	0.09	0.15	0.24	0.16	0.26	0.4	0.14	0.29	0.55	0.08	0.17	0.31	0.11	0.17	0.26	0.11	0.17	0.24	0.08	0.15	0.22	0.02	0.05	0.08	0.04	0.09	0.14	0.05	0.14	0.26	0.04	0.11	0.2
chr15:73225078:73225193:-@chr15:73195471:73195625:-@chr15:73173563:73173789:-	ENSMUSG00000022607	FAK,Ptk2	complete cds., RIKEN full-length enriched library,Mus musculus mRNA for focal adhesion kinase spliced variant p110FAK, clone:1600015M17 product:PTK2 protein tyrosine kinase 2, full insert sequence.,Adult female placenta cDNA	-2	2.56566	8.94558	0.36	0.33	-0.03	-0.510381	0.09	0.25	0.53	0.16	0.39	0.68	0.15	0.44	0.79	0.5	0.78	0.98	0.08	0.23	0.52	0.1	0.26	0.51	0.05	0.13	0.26	0.07	0.18	0.32	0.02	0.1	0.27	0.38	0.61	0.88	0.26	0.69	0.98	0.23	0.46	0.75	0.09	0.3	0.67
chr7:35706348:35706531|35706530:+@chr7:35709400:35709527:+	ENSMUSG00000063931	Pepd	peptidase D	n/a	n/a	n/a	n/a	n/a	n/a	n/a	0.66	0.87	0.99	0.4	0.77	0.98	0.57	0.85	0.98	0.72	0.9	0.99	0.53	0.8	0.98	0.55	0.84	0.99	0.55	0.84	0.98	0.31	0.76	0.99	0.2	0.57	0.9	0.56	0.82	0.98	0.68	0.89	0.99	0.4	0.8	0.99	0.66	0.91	1
chr1:63223398:63223865:+@chr1:63224297:63224450:+@chr1:63225013:63225139:+	ENSMUSG00000025967	Eef1b2	eukaryotic translation elongation factor 1 beta	8	2.10101	16.0797	1	1	0	0.36686	0.98	1	1	0.98	0.99	1	0.99	1	1	0.99	1	1	0.98	0.99	1	0.98	0.99	1	0.98	1	1	0.97	0.99	1	0.66	0.75	0.84	0.75	0.84	0.94	0.99	1	1	0.99	1	1	0.97	0.99	1
chr14:56199755:56199813|56199809:+@chr14:56199889:56200298:+	ENSMUSG00000022216	Psme1	proteasome (prosome, macropain) 28 subunit	n/a	n/a	n/a	n/a	n/a	n/a	n/a	0	0.03	0.08	0	0.04	0.11	0	0.04	0.15	0	0.02	0.08	0	0.04	0.14	0	0.03	0.1	0	0.01	0.06	0	0.03	0.17	0.01	0.05	0.13	0	0.02	0.07	0	0.02	0.07	0.01	0.09	0.25	0.01	0.08	0.21
chr3:95591207:95591307:-@chr3:95590243:95590320:-@chr3:95588977:95589029:-	ENSMUSG00000028106	mKIAA0460,4930535B03Rik	Adult male testis cDNA, 11 days embryo whole body cDNA, clone:2810036A19 product:HSPC099 (FRAGMENT) homolog [Homo sapiens],hypothetical protein LOC75137, RIKEN full-length enriched library,Mus musculus 10, clone:4930535B03 product:HSPC099 homolog., full insert sequence.	n/a	n/a	n/a	n/a	n/a	n/a	n/a	0.69	0.91	0.99	0.35	0.6	0.85	0.43	0.73	0.93	0.53	0.82	0.97	n/a	n/a	n/a	0.67	0.91	1	0.76	0.93	0.99	0.52	0.84	0.98	0.75	0.9	0.98	0.71	0.89	0.99	0.59	0.85	0.99	0.6	0.77	0.94	0.58	0.8	0.96
chr7:19677288:19677603:+@chr7:19677767|19677892:19677981:+	ENSMUSG00000030409	n/a	n/a	-4	-0.646465	4.81016	0.23	0.19	-0.04	-0.697178	0.2	0.24	0.28	0.18	0.21	0.25	0.2	0.24	0.28	0.15	0.19	0.23	0.19	0.28	0.39	0.25	0.3	0.36	0.14	0.16	0.2	0.24	0.28	0.33	0.16	0.21	0.27	0.17	0.2	0.24	0.23	0.26	0.3	0.16	0.2	0.26	0.16	0.21	0.26
chr4:129278227:129278378:+@chr4:129279114:129279174:+@chr4:129279439:129279505:+	ENSMUSG00000028797	2510006D16Rik	Mus musculus adult male cerebellum cDNA, clone:1500002D11 product:weakly similar to PP1065 [Homo sapiens], full insert sequence.,hypothetical protein LOC76799, RIKEN full-length enriched library	33	-0.474747	13.5321	0.08	0.2	0.12	2.47373	0.01	0.04	0.13	0.02	0.09	0.21	0.04	0.11	0.23	0.01	0.05	0.12	0.05	0.18	0.35	0.01	0.04	0.12	0.01	0.06	0.13	0	0.02	0.05	0.03	0.06	0.11	0	0.01	0.03	0.03	0.08	0.17	0.19	0.37	0.61	0.02	0.18	0.41
chr19:7014973:7015683:-@chr19:7014842:7014891:-@chr19:7013751:7013900:-	ENSMUSG00000024958	Gpr137	expressed sequence AI428855	-10	-0.191919	6.50668	0.84	0.64	-0.2	-1.50739	0.65	0.85	0.99	0.53	0.84	0.98	0.56	0.83	0.99	0.28	0.66	0.98	0.54	0.78	0.95	0.74	0.9	0.98	0.67	0.84	0.97	0.49	0.74	0.93	0.2	0.69	0.99	0.4	0.68	0.95	0.64	0.87	0.99	0.57	0.85	0.99	0.61	0.88	0.99
chr11:121532184:121532283:-@chr11:121512923:121512987:-@chr11:121505841:121505906:-	ENSMUSG00000046605	B3gntl1	UDP-GlcNAc:betaGal	-1	-0.111111	0.897684	0.73	0.53	-0.2	-0.990203	0.49	0.8	0.98	0.49	0.81	0.98	0.12	0.57	0.95	0.12	0.56	0.97	0.09	0.52	0.93	0.3	0.76	0.97	0.58	0.83	1	0.24	0.67	0.99	0.33	0.77	0.98	0.11	0.48	0.88	0.06	0.36	0.87	0.11	0.63	0.97	0.15	0.49	0.86
chr9:104955566:104955842:+@chr9:104956751|104956845:104956935:+	ENSMUSG00000032563	Mrpl3	Mrpl3 protein.,mitochondrial ribosomal protein L3	n/a	n/a	n/a	n/a	n/a	n/a	n/a	0.89	0.96	1	0.81	0.94	0.99	0.84	0.93	0.99	0.88	0.96	0.99	0.75	0.92	1	0.91	0.97	1	0.91	0.97	1	0.88	0.96	1	0.93	0.97	0.99	0.94	0.98	1	0.82	0.94	1	0.87	0.96	1	0.82	0.95	1
chr2:119011765:119011823:-@chr2:119011432:119011519:-@chr2:119009601:119009738:-	ENSMUSG00000034278	Dnajc17	subfamily C,DnaJ (Hsp40) homolog	n/a	n/a	n/a	n/a	n/a	n/a	n/a	0.67	0.89	1	0.66	0.87	0.99	0.66	0.91	0.99	0.57	0.85	0.98	0.61	0.85	1	n/a	n/a	n/a	0.65	0.87	0.98	0.68	0.87	0.99	0.54	0.83	0.98	0.51	0.82	0.99	0.71	0.91	0.99	0.71	0.89	0.99	0.53	0.79	0.96
chr5:109098125:109098536:+@chr5:109099138:109099278:+@chr5:109108518:109108603:+	ENSMUSG00000033540	Idua	iduronidase, alpha-L-	n/a	n/a	n/a	n/a	n/a	n/a	n/a	0.87	0.96	1	0.85	0.95	1	0.83	0.93	0.99	0.19	0.63	0.96	0.58	0.86	0.99	0.44	0.75	0.95	0.82	0.95	1	0.87	0.96	1	0.62	0.86	0.99	0.79	0.94	1	0.77	0.91	0.98	0.82	0.94	1	0.79	0.94	0.99
chr2:34709912:34709772|34709768:-@chr2:34706649:34708353:-	ENSMUSG00000026869	Psmd5	proteasome 26S non-ATPase subunit 5	n/a	n/a	n/a	n/a	n/a	n/a	n/a	0	0.13	0.43	0	0.1	0.3	0	0.27	0.73	0.02	0.19	0.54	0.01	0.16	0.5	0.04	0.33	0.78	0.01	0.12	0.35	0.02	0.19	0.44	0.04	0.41	0.81	0.04	0.32	0.82	0.01	0.2	0.59	0.01	0.1	0.33	0	0.11	0.34
chr1:191504385:191504151|191504100:-@chr1:191502818:191503020:-	ENSMUSG00000026605	Cenpf	clone:A930101O15 product:weakly similar to CENP-F KINETOCHORE PROTEIN (CENTROMERE PROTEIN F) (MITOSIN) (AH ANTIGEN) (Fragment).,Adult retina cDNA,centromere protein F, RIKEN full-length enriched library	n/a	n/a	n/a	n/a	n/a	n/a	n/a	n/a	n/a	n/a	n/a	n/a	n/a	n/a	n/a	n/a	n/a	n/a	n/a	n/a	n/a	n/a	0.04	0.5	0.91	0.02	0.33	0.81	0.08	0.31	0.66	0.02	0.57	0.99	0.02	0.32	0.75	n/a	n/a	n/a	n/a	n/a	n/a	n/a	n/a	n/a
chr1:183886525:183886702:-@chr1:183865791:183865847:-@chr1:183860630:183860893:-	ENSMUSG00000022995	Enah	clone:9030215D04 product:enabled homolog (Drosophila),Mus musculus adult male colon cDNA, RIKEN full-length enriched library	-12	-0.181818	11.219	0.04	0.04	0	-1.05341	0	0.03	0.07	0.01	0.05	0.1	0	0.03	0.09	0.25	0.43	0.61	0.02	0.07	0.15	0.01	0.04	0.1	0.03	0.08	0.13	0.01	0.05	0.1	0.04	0.08	0.15	0.01	0.03	0.08	0	0.05	0.16	0.01	0.05	0.13	0.01	0.06	0.13
chr11:120578794:120578852:+@chr11:120579139:120579216:+@chr11:120579351:120579486:+	ENSMUSG00000025145	Lrrc45	full insert sequence., clone:C130042M23 product:similar to HYPOTHETICAL 76.0 KDA PROTEIN [Homo sapiens],Mus musculus 16 days embryo head cDNA,leucine rich repeat containing 45, RIKEN full-length enriched library	n/a	n/a	n/a	n/a	n/a	n/a	n/a	0.28	0.6	0.88	0.56	0.84	0.98	0.17	0.55	0.88	0.06	0.37	0.79	0.66	0.88	0.99	0.7	0.9	0.99	0.51	0.79	0.97	0.46	0.78	0.97	0.55	0.84	1	0.45	0.73	0.97	0.41	0.77	0.96	0.55	0.81	0.99	0.05	0.42	0.9
chr10:61129659:61129786:+@chr10:61130333|61130409:61130418:+	ENSMUSG00000020089	Ppa1	pyrophosphatase	n/a	n/a	n/a	n/a	n/a	n/a	n/a	0.71	0.89	1	0.73	0.93	0.99	0.76	0.92	1	0.83	0.95	0.99	0.65	0.89	0.99	0.83	0.93	1	0.68	0.88	0.99	0.67	0.87	0.99	0.83	0.95	1	0.86	0.95	1	0.77	0.92	0.99	0.73	0.89	0.98	0.74	0.9	0.99
chr14:13119784:13119907:+@chr14:13129136:13129261:+@chr14:13130096:13130353:+	ENSMUSG00000033111	3830406C13Rik	hypothetical protein LOC218734 isoform 1,hypothetical protein LOC218734 isoform 2	-4	-0.848485	7.55901	0.46	0.3	-0.16	-0.416922	0.2	0.45	0.73	0.38	0.64	0.9	0.08	0.29	0.62	0.06	0.3	0.63	0.19	0.51	0.88	0.05	0.17	0.41	0.27	0.47	0.68	0.24	0.51	0.8	0.19	0.6	0.92	0.12	0.27	0.46	0.06	0.22	0.47	0.04	0.3	0.72	0.02	0.17	0.43
chr7:29625600:29625710|29625629:+@chr7:29625883:29625994:+	ENSMUSG00000053964	Lgals4	galactose binding,lectin	-5	-0.59596	13.2321	0.37	0.5	0.13	-0.332829	0.19	0.32	0.47	0.27	0.48	0.71	0.15	0.3	0.47	0.35	0.49	0.64	0.24	0.41	0.63	0.26	0.39	0.52	0.2	0.35	0.54	0.36	0.56	0.78	0.08	0.15	0.23	0.11	0.2	0.33	0.01	0.12	0.3	0.17	0.4	0.7	0.04	0.25	0.72
chr16:18272814:18272896:-@chr16:18259972:18260072:-@chr16:18259306:18259748:-	ENSMUSG00000022718	Dgcr8	complete cds.,Mus musculus DGCR8 gene,DiGeorge syndrome critical region gene 8	n/a	n/a	n/a	n/a	n/a	n/a	n/a	0.61	0.87	0.99	0.69	0.9	0.99	0.44	0.76	0.97	0.91	0.97	1	0.64	0.85	0.98	0.44	0.76	0.98	0.7	0.92	0.99	0.63	0.85	0.98	0.7	0.89	0.99	0.49	0.86	1	0.62	0.88	0.99	0.58	0.88	0.99	0.75	0.9	0.99
chr17:56703927:56704057:-@chr17:56702935:56703047:-@chr17:56700394:56702854:-	ENSMUSG00000042625	Safb2	RIKEN full-length enriched library, clone:6330514O11 product:inferred: hypothetical protein KIAA0138 {Homo sapiens},Mus musculus adult male medulla oblongata cDNA, full insert sequence.,scaffold attachment factor B2, clone:G270043F24 product:Scaffold attachment factor B2 homolog [Mus musculus],Mus musculus melanocyte cDNA	n/a	n/a	n/a	n/a	n/a	n/a	n/a	0.94	0.98	1	0.93	0.98	1	0.93	0.98	1	0.94	0.98	1	0.86	0.96	1	0.91	0.97	1	0.96	0.99	1	0.96	0.99	1	0.93	0.98	1	0.94	0.98	1	0.94	0.98	1	0.93	0.98	1	0.9	0.98	1
chr3:16083165:16083520:+@chr3:16083922:16083946:+@chr3:16089478:16089563:+	ENSMUSG00000047213	Ythdf3	YTH domain family 3,YTH domain family protein 3.	n/a	n/a	n/a	n/a	n/a	n/a	n/a	0.71	0.89	1	0.62	0.87	0.99	0.62	0.84	0.99	0.36	0.78	1	0.36	0.74	0.99	0.66	0.87	0.98	0.73	0.93	1	0.9	0.98	1	0.83	0.94	1	0.94	0.98	1	0.38	0.75	0.95	0.65	0.88	0.99	0.56	0.85	0.99
chr15:76173952:76174122:+@chr15:76174710:76174928:+@chr15:76175012:76175167:+	n/a	n/a	n/a	9	-0.959596	9.78446	1	0.98	-0.02	1.0179	0.99	1	1	0.99	1	1	1	1	1	0.97	0.99	1	0.76	0.84	0.94	0.97	0.99	1	1	1	1	0.99	1	1	0.99	1	1	0.99	1	1	0.99	1	1	0.99	1	1	0.99	1	1
chr12:105058095:105058365:-@chr12:105002878:105003028:-@chr12:104967441:104967591:-@chr12:104966088:104966643:-	ENSMUSG00000071177	Serpina1d	serine (or cysteine) proteinase inhibitor	4	-0.373737	3.87321	0.47	0.53	0.07	1.12923	0.36	0.49	0.62	0.27	0.4	0.55	0.33	0.51	0.7	0.1	0.27	0.46	0.31	0.56	0.82	0.17	0.35	0.53	0.45	0.61	0.76	0.26	0.47	0.66	0.03	0.22	0.52	0.04	0.3	0.74	0.13	0.27	0.48	0.42	0.57	0.71	0.17	0.39	0.62
chr4:118957714:118958041:-@chr4:118955386:118955475:-@chr4:118954456:118955053:-	ENSMUSG00000028639	Ybx1	Mus musculus Y box transcription factor mRNA, partial cds.,nuclease sensitive element binding protein 1	n/a	n/a	n/a	n/a	n/a	n/a	n/a	1	1	1	1	1	1	0.99	1	1	1	1	1	0.99	1	1	1	1	1	1	1	1	1	1	1	1	1	1	1	1	1	1	1	1	1	1	1	0.99	1	1
chr5:30574009:30574077:+@chr5:30574958:30575066:+@chr5:30579256:30579330:+	ENSMUSG00000075703	D5Wsu178e,mKIAA1724	clone:4631422L12 product:hypothetical CDP-alcohol phosphatidyltransferase containing protein,Mus musculus 0 day neonate skin cDNA, RIKEN full-length enriched library, full insert sequence.,selenoprotein I	n/a	n/a	n/a	n/a	n/a	n/a	n/a	0.58	0.86	0.99	0.44	0.75	0.95	0.51	0.8	0.96	0.17	0.49	0.82	n/a	n/a	n/a	0.57	0.84	0.99	0.61	0.85	0.98	0.65	0.88	0.98	0.71	0.91	1	0.71	0.91	0.99	0.22	0.55	0.89	n/a	n/a	n/a	n/a	n/a	n/a
chr5:108030750:108030878|108030864:+@chr5:108032545:108032643:+	ENSMUSG00000033773	Rpap2	UPF0385 protein C1orf82 homolog.,RNA polymerase II associated protein 2	n/a	n/a	n/a	n/a	n/a	n/a	n/a	0.12	0.48	0.83	0.05	0.46	0.88	0.04	0.31	0.7	0.27	0.55	0.87	n/a	n/a	n/a	0.01	0.12	0.39	0.06	0.29	0.73	0.05	0.21	0.42	0	0.24	0.72	0.05	0.3	0.63	n/a	n/a	n/a	n/a	n/a	n/a	n/a	n/a	n/a
chr8:74211939:74212099|74212061:+@chr8:74214071:74214766:+	ENSMUSG00000031805	Jak3,Insl3	clone:A130091E14 product:Janus kinase 3, full insert sequence., RIKEN full-length enriched library,Mus musculus 16 days neonate thymus cDNA,Janus kinase 3	-2	-1.17172	7.24888	0.5	0.49	-0.01	-0.114264	0.19	0.42	0.68	0.3	0.54	0.79	0.21	0.53	0.94	0.04	0.24	0.52	0.08	0.32	0.68	0.53	0.84	0.99	0.18	0.42	0.68	0.5	0.69	0.88	0.23	0.61	0.88	0.3	0.61	0.91	0.54	0.7	0.85	0.21	0.43	0.66	0.07	0.25	0.55
chr8:73126361:73126334|73126300:-@chr8:73125989:73126215:-	ENSMUSG00000070003	Ssbp4	Mus musculus adult male lung cDNA, clone:1210002E11 product:SINGLE STRANDED DNA BINDING PROTEIN-3 homolog [Homo sapiens], RIKEN full-length enriched library, full insert sequence.,single stranded DNA binding protein 4	n/a	n/a	n/a	n/a	n/a	n/a	n/a	0.7	0.92	1	0.79	0.94	1	0.71	0.89	0.98	0.9	0.97	1	0.68	0.9	0.99	0.76	0.93	1	0.88	0.96	1	0.81	0.93	0.99	0.75	0.9	1	0.82	0.94	0.99	0.68	0.89	0.98	0.67	0.89	0.98	0.71	0.9	0.99
chr6:48790995:48791374:-@chr6:48790360:48790447:-@chr6:48788171:48788364:-	ENSMUSG00000029810	Tmem176b	LR8 protein	-4	0.262626	12.9378	0.39	0.46	0.07	-0.329472	0.1	0.33	0.7	0.19	0.51	0.86	0.09	0.32	0.68	0.51	0.85	1	0.17	0.55	0.91	0.02	0.13	0.44	0.26	0.5	0.77	0.63	0.88	0.99	0.62	0.86	0.99	0.44	0.73	0.97	0.12	0.36	0.71	0.01	0.21	0.66	0.1	0.48	0.88
chrX:72376064:72376356:-@chrX:72374632:72374719:-@chrX:72371076:72371219:-	ENSMUSG00000031402	Mpp1	Mus musculus partial mRNA for membrane protein, palmitoylated, palmitoylated (Mpp1 gene).,membrane protein	n/a	n/a	n/a	n/a	n/a	n/a	n/a	0.01	0.15	0.48	0	0.09	0.29	0.01	0.11	0.32	0.01	0.11	0.26	0	0.23	0.6	0.01	0.19	0.53	0.03	0.2	0.65	0.01	0.08	0.34	0.08	0.5	0.97	0.02	0.19	0.56	0.01	0.1	0.43	0.05	0.3	0.74	0.04	0.22	0.62
chr5:138619151:138619201:+@chr5:138619297:138619408:+	n/a	n/a	n/a	n/a	n/a	n/a	n/a	n/a	n/a	n/a	n/a	n/a	n/a	n/a	n/a	n/a	n/a	n/a	n/a	n/a	n/a	n/a	n/a	n/a	n/a	0.02	0.14	0.39	0.25	0.57	0.89	n/a	n/a	n/a	n/a	n/a	n/a	n/a	n/a	n/a	n/a	n/a	n/a	0.03	0.2	0.55	n/a	n/a	n/a
chr4:134389113:134389236:-@chr4:134387762:134387870:-@chr4:134386464:134386642:-	ENSMUSG00000028826	Tmem57	RIKEN full-length enriched library,Mus musculus adult male epididymis cDNA, clone:1110007C24 product:hypothetical protein, full insert sequence., clone:9230118A01 product:unclassifiable,transmembrane protein 57,Mus musculus 18-day embryo whole body cDNA	n/a	n/a	n/a	n/a	n/a	n/a	n/a	0.01	0.05	0.12	0	0.03	0.08	0.02	0.11	0.24	0.04	0.17	0.37	0.02	0.1	0.25	0	0.05	0.14	0.02	0.07	0.15	0	0.03	0.1	0.06	0.14	0.25	0.01	0.06	0.13	0.03	0.15	0.28	0.01	0.06	0.15	0.02	0.09	0.19
chr6:71843376:71843520:-@chr6:71842463:71842513:-@chr6:71839584:71839680:-	ENSMUSG00000063884	Ptcd3	Mus musculus 10 days embryo whole body cDNA,Pentatricopeptide repeat domain 3, RIKEN full-length enriched library, clone:2610034F17 product:unclassifiable, full insert sequence.,Ptcd3 protein.	n/a	n/a	n/a	n/a	n/a	n/a	n/a	0.5	0.78	0.97	0.48	0.85	0.99	0.52	0.81	0.99	0.82	0.94	0.99	0.76	0.93	0.99	0.91	0.97	1	0.95	0.98	1	0.94	0.98	1	0.9	0.98	1	0.92	0.97	0.99	0.35	0.68	0.97	0.93	0.98	1	0.9	0.96	0.99
chr2:91002185:91002391:-@chr2:91000474:91000527:-@chr2:90999362:90999462:-	ENSMUSG00000040687	Madd,mKIAA0358	MAP-kinase activating death domain, RIKEN full-length enriched library,Mus musculus 16 days neonate cerebellum cDNA, clone:9630003L17 product:SIMILAR TO MAP-KINASE ACTIVATING DEATH DOMAIN homolog [Mus musculus], full insert sequence.,Madd protein.	n/a	n/a	n/a	n/a	n/a	n/a	n/a	0.07	0.28	0.55	0.01	0.11	0.41	0.07	0.38	0.84	0.06	0.34	0.69	n/a	n/a	n/a	0.14	0.48	0.87	0.17	0.46	0.77	0.19	0.46	0.77	0.11	0.49	0.93	0.04	0.22	0.48	0.03	0.39	0.89	n/a	n/a	n/a	n/a	n/a	n/a
chr5:3605434:3606410:+@chr5:3607667:3607786:+@chr5:3609854:3609977:+	ENSMUSG00000005907	Pex1	full insert sequence.,2 days pregnant adult female ovary cDNA, clone:E330005K07 product:hypothetical protein,peroxin1, RIKEN full-length enriched library	n/a	n/a	n/a	n/a	n/a	n/a	n/a	0.36	0.75	0.97	0.62	0.87	0.99	0.35	0.74	0.98	0.54	0.83	0.98	0.29	0.69	0.98	0.58	0.84	0.98	0.81	0.93	0.99	0.67	0.89	0.98	0.78	0.93	0.99	0.74	0.9	0.99	0.13	0.53	0.9	0.46	0.79	0.99	0.54	0.81	0.99
chr6:118492908:118493001:-@chr6:118490454:118490567:-@chr6:118489865:118489893:-	ENSMUSG00000007827	Ankrd26	ankyrin repeat domain 26	n/a	n/a	n/a	n/a	n/a	n/a	n/a	n/a	n/a	n/a	n/a	n/a	n/a	n/a	n/a	n/a	n/a	n/a	n/a	n/a	n/a	n/a	n/a	n/a	n/a	0.26	0.64	0.97	n/a	n/a	n/a	n/a	n/a	n/a	n/a	n/a	n/a	n/a	n/a	n/a	n/a	n/a	n/a	n/a	n/a	n/a
chr10:80164542:80164722:-@chr10:80163979:80164042:-@chr10:80153814:80154312:-	n/a	n/a	n/a	n/a	n/a	n/a	n/a	n/a	n/a	n/a	0.02	0.28	0.72	0	0.13	0.41	0.01	0.23	0.66	0.08	0.32	0.7	0.05	0.42	0.87	0	0.37	0.87	0.01	0.15	0.53	0.01	0.13	0.39	0.08	0.28	0.87	0.01	0.15	0.46	0.02	0.24	0.76	0.02	0.22	0.62	0.03	0.25	0.67
chr10:57520717:57520930|57520784:+@chr10:57522226:57522370:+	ENSMUSG00000019872	Smpdl3a	acid sphingomyelinase-like phosphodiesterase 3a	-3	0.494949	3.98577	0.94	0.95	0.01	-0.876857	0.87	0.96	1	0.81	0.94	0.99	0.8	0.92	0.98	0.93	0.98	1	0.8	0.91	0.99	0.91	0.97	1	0.89	0.96	1	0.93	0.98	1	0.92	0.97	1	0.93	0.98	1	0.78	0.91	0.99	0.63	0.84	1	0.63	0.86	0.99
chr4:40176528:40176709:-@chr4:40174999:40175146:-@chr4:40173544:40173752:-	ENSMUSG00000040296	Ddx58	DEAD/H box polypeptide RIG-I,Probable ATP-dependent RNA helicase DDX58 (EC 3.6.1.-) (DEAD-box protein 58) (Retinoic acid-inducible gene 1 protein) (RIG-1) (RIG-I).	n/a	n/a	n/a	n/a	n/a	n/a	n/a	0.65	0.86	0.99	0.65	0.86	0.99	0.39	0.73	0.97	0.32	0.67	0.98	0.35	0.73	0.99	0.4	0.75	0.94	0.84	0.95	1	0.81	0.93	0.99	0.67	0.9	0.99	0.41	0.74	0.99	0.58	0.82	0.97	n/a	n/a	n/a	0.47	0.78	0.99
chrX:159347941:159348111:+@chrX:159351140:159351240:+@chrX:159359131:159359247:+	ENSMUSG00000031360	Ctps2	cytidine 5'-triphosphate synthase 2	n/a	n/a	n/a	n/a	n/a	n/a	n/a	0.56	0.84	1	0.38	0.76	0.98	0.27	0.71	0.96	0.47	0.77	1	0.47	0.81	1	0.57	0.8	0.98	0.7	0.9	1	0.39	0.76	0.99	0.66	0.87	0.98	0.77	0.94	1	n/a	n/a	n/a	0.51	0.81	0.99	0.49	0.83	0.98
chr15:63990444:63990566:-@chr15:63985406:63985414:-@chr15:63984392:63984492:-	ENSMUSG00000022377	Shag1,Ddef1	development and differentiation enhancing, complete cds.,Mus musculus ADP-ribosylation factor-directed GTPase activating protein isoform a (Shag1) mRNA	n/a	n/a	n/a	n/a	n/a	n/a	n/a	0.02	0.33	0.86	0.08	0.39	0.92	0.03	0.43	0.85	0.02	0.28	0.59	0.01	0.24	0.75	0.04	0.32	0.85	0.03	0.26	0.66	0	0.1	0.28	0.02	0.23	0.66	0.03	0.28	0.68	0.05	0.4	0.91	0.02	0.19	0.49	0.07	0.48	0.92
chr11:104179347:104179563:+@chr11:104182377:104182473:+@chr11:104182665:104182746:+	ENSMUSG00000018411	Mapt	microtubule-associated protein tau isoform b,Microtubule-associated protein tau (Neurofibrillary tangle protein) (Paired helical filament-tau) (PHF-tau).	n/a	n/a	n/a	n/a	n/a	n/a	n/a	0.01	0.04	0.1	0	0.02	0.06	0.01	0.03	0.07	0	0.01	0.04	0	0.03	0.09	0	0.02	0.06	0	0.03	0.07	0	0.03	0.08	0.01	0.04	0.1	0	0.02	0.09	0	0.03	0.09	0	0.05	0.2	0	0.04	0.16
chr9:13640547:13640627:+@chr9:13641103:13641160:+@chr9:13641281:13641416:+	ENSMUSG00000037808	2810485I05Rik,Fam76b	Protein FAM76B.,hypothetical protein LOC72826	n/a	n/a	n/a	n/a	n/a	n/a	n/a	0.02	0.18	0.55	n/a	n/a	n/a	n/a	n/a	n/a	0.06	0.46	0.93	n/a	n/a	n/a	0.01	0.2	0.54	0.01	0.21	0.6	0.02	0.16	0.48	0.02	0.1	0.23	0.01	0.04	0.12	0	0.18	0.66	0.02	0.16	0.55	0	0.11	0.42
chr9:21634658:21634821:-@chr9:21633918:21634022:-@chr9:21630227:21630319:-	ENSMUSG00000032198	Dock6	clone:C330023D02 product:weakly similar to CDNA FLJ30839 FIS, RIKEN full-length enriched library,dedicator of cytokinesis 6, CLONE FEBRA2002429 [Homo sapiens], full insert sequence.,Mus musculus ES cells cDNA,Dedicator of cytokinesis protein 6.	-11	-0.353535	7.01415	0.75	0.59	-0.16	-1.51786	0.46	0.76	0.96	0.47	0.71	0.92	0.53	0.77	0.96	0.51	0.81	0.99	0.21	0.69	1	0.61	0.86	0.99	0.63	0.85	0.98	0.33	0.67	0.93	0.5	0.8	0.99	0.59	0.87	0.99	0.62	0.85	0.99	0.49	0.77	0.98	0.25	0.53	0.85
chr10:13234513:13234680:+@chr10:13234923:13235349:+	n/a	n/a	n/a	61	0.616162	20.2393	0.45	0.72	0.27	2.98349	0.4	0.48	0.56	0.39	0.48	0.57	0.3	0.38	0.48	0.37	0.43	0.49	0.37	0.46	0.56	0.5	0.56	0.62	0.49	0.55	0.62	0.59	0.67	0.74	0.4	0.46	0.53	0.47	0.53	0.59	0.33	0.41	0.5	0.48	0.56	0.64	0.41	0.5	0.6
chr7:90780469:90780649:+@chr7:90781246:90781295:+@chr7:90781640:90784972:+	ENSMUSG00000046027	Stard5	StAR-related lipid transfer protein 5	n/a	n/a	n/a	n/a	n/a	n/a	n/a	0.59	0.86	0.98	0.32	0.75	0.98	0.58	0.82	0.98	0.52	0.84	0.99	0.15	0.67	0.94	0.43	0.76	0.96	0.7	0.91	1	0.8	0.94	1	0.92	0.97	1	0.9	0.96	0.99	0.81	0.93	1	0.43	0.75	0.96	0.38	0.75	0.94
chr17:34869669:34869836:-@chr17:34869115:34869174:-@chr17:34868021:34868114:-	ENSMUSG00000073418	n/a	complement component 4 (within H-2S), clone TRACH3016051, highly similar to Complement C4 precursor.,Mus musculus cDNA fis	n/a	n/a	n/a	n/a	n/a	n/a	n/a	0.59	0.86	0.99	0.69	0.87	0.97	0.77	0.92	1	0.89	0.97	0.99	n/a	n/a	n/a	0.34	0.66	0.91	0.76	0.91	0.99	0.89	0.97	1	0.96	0.98	1	0.94	0.98	1	0.61	0.85	0.99	0.57	0.83	0.98	0.6	0.86	0.99
chr2:125412067:125412210:-@chr2:125409528:125409800:-	n/a	n/a	n/a	n/a	n/a	n/a	n/a	n/a	n/a	n/a	0.01	0.03	0.09	n/a	n/a	n/a	n/a	n/a	n/a	n/a	n/a	n/a	n/a	n/a	n/a	n/a	n/a	n/a	n/a	n/a	n/a	n/a	n/a	n/a	n/a	n/a	n/a	n/a	n/a	n/a	n/a	n/a	n/a	n/a	n/a	n/a	n/a	n/a	n/a
chr9:83471043:83471228:+@chr9:83488265:83488345:+@chr9:83529698:83532408:+	ENSMUSG00000032261	Sh3bgrl2	clone:6330583A05 product:SH3BGRL2-like protein, RIKEN full-length enriched library,Adult male medulla oblongata cDNA	1	-0.161616	0.884286	0.6	0.74	0.14	1.31362	0.27	0.73	0.96	0.15	0.58	0.92	0.05	0.48	0.98	0.08	0.61	1	0.16	0.55	0.93	0.16	0.6	0.96	0.36	0.77	0.99	0.11	0.47	0.84	0.05	0.3	0.72	0.16	0.51	0.97	0.17	0.6	0.97	0.15	0.62	0.94	0.05	0.49	0.96
chr10:95436620:95436712:+@chr10:95452196:95452323:+@chr10:95452889:95452943:+	ENSMUSG00000036499	Eea1	early endosome antigen 1	n/a	n/a	n/a	n/a	n/a	n/a	n/a	0.74	0.9	0.98	0.62	0.85	0.99	0.5	0.79	0.99	0.28	0.66	0.97	0.62	0.89	0.99	0.33	0.64	0.89	0.81	0.95	1	0.81	0.94	1	0.56	0.81	0.97	0.69	0.92	0.99	0.56	0.83	0.97	0.66	0.87	0.98	0.6	0.84	0.97
chr15:99080894:99081013:-@chr15:99080437|99080445:99080307:-	ENSMUSG00000037570	MSP58,Mcrs1	complete cds.,Mus musculus nucleolar protein (MSP58) mRNA,microspherule protein 1	n/a	n/a	n/a	n/a	n/a	n/a	n/a	0.54	0.83	0.98	0.7	0.9	0.99	0.66	0.89	0.99	0.04	0.47	0.99	0.52	0.83	0.99	0.55	0.87	0.99	0.76	0.92	0.99	0.82	0.94	0.99	0.43	0.83	0.99	0.31	0.76	0.98	0.47	0.79	0.99	0.48	0.77	0.96	0.31	0.74	0.96
chr10:80317363:80317925:-@chr10:80316570|80316574:80316503:-	ENSMUSG00000035215	Lsm7	LSM7 homolog, U6 small nuclear RNA associated	n/a	n/a	n/a	n/a	n/a	n/a	n/a	0.8	0.94	0.99	0.86	0.95	1	0.87	0.96	1	0.93	0.98	1	0.76	0.93	1	0.87	0.97	1	0.87	0.96	1	0.83	0.95	1	0.94	0.98	1	0.96	0.99	1	0.86	0.96	1	0.76	0.91	0.99	0.79	0.93	0.99
chr3:131001080:131001339:-@chr3:131000704:131000974:-	n/a	n/a	n/a	-5	0.151515	9.66443	0.83	0.83	0	-0.533038	0.59	0.8	0.95	0.77	0.91	0.98	0.48	0.78	1	0.35	0.67	0.99	0.49	0.78	0.98	0.69	0.89	0.99	0.62	0.85	0.98	0.8	0.93	1	0.84	0.95	0.99	0.91	0.97	0.99	0.3	0.58	0.93	0.59	0.85	0.98	0.6	0.85	0.98
chr9:106377011:106377199:-@chr9:106376851|106376866:106376728:-	ENSMUSG00000023249	Adprt3,Parp3	poly (ADP-ribose) polymerase family,Mus musculus NAD+ ADP-ribosyltransferase 3 PARP-3 mRNA, member 3, complete cds.	2	0.313131	1.46781	0.16	0.25	0.09	1.14924	0.04	0.17	0.4	0.04	0.15	0.32	0.01	0.17	0.52	0	0.04	0.12	0.04	0.24	0.72	0.03	0.12	0.27	0.05	0.14	0.24	0.05	0.12	0.21	0.03	0.18	0.4	0.01	0.07	0.21	0.05	0.2	0.42	0.02	0.2	0.52	0.04	0.19	0.43
chr2:29882652:29883168:+@chr2:29884164:29884226:+@chr2:29885140:29885716:+	ENSMUSG00000057738	Spna2	spectrin alpha 2	42	0.484848	17.6694	0.55	0.81	0.26	2.34954	0.44	0.57	0.69	0.51	0.62	0.73	0.34	0.46	0.58	0.31	0.45	0.62	0.54	0.7	0.84	0.44	0.76	0.97	0.23	0.34	0.46	0.47	0.57	0.69	0.37	0.57	0.81	0.36	0.5	0.64	0.22	0.32	0.44	0.73	0.87	0.96	0.42	0.61	0.79
chr15:61869540:61869756:+@chr15:61886349:61886454:+@chr15:61938703:61939020:+@chr15:62007022:62007103:+	ENSMUSG00000072566	AK020628,AK043252,AK179413,AK043790,NR_003368,AK090048	full insert sequence., clone:9530065L16 product:unclassifiable,Mus musculus adult male urinary bladder cDNA, RIKEN full-length enriched library	n/a	n/a	n/a	n/a	n/a	n/a	n/a	0.07	0.47	0.93	0.05	0.31	0.81	0.02	0.33	0.89	0.01	0.22	0.65	0.04	0.39	0.9	0.03	0.38	0.77	0.1	0.4	0.69	0.06	0.59	0.99	0.02	0.26	0.71	0.08	0.42	0.81	0.08	0.35	0.73	0.01	0.24	0.67	0.01	0.51	0.87
chr6:18385446:18383983|18383820:-@chr6:18377439:18377642:-	ENSMUSG00000000416	Cttnbp2	clone:4732477G22 product:BRAIN SPECIFIC CORTACTIN-BINDING PROTEIN CBP90 (FRAGMENT) homolog [Rattus norvegicus], full insert sequence.,Mus musculus 10 days neonate skin cDNA,cortactin binding protein 2, RIKEN full-length enriched library	n/a	n/a	n/a	n/a	n/a	n/a	n/a	n/a	n/a	n/a	0.1	0.55	0.98	n/a	n/a	n/a	n/a	n/a	n/a	n/a	n/a	n/a	n/a	n/a	n/a	0.13	0.66	0.98	0.27	0.64	0.96	0.11	0.59	0.94	0.09	0.51	0.91	n/a	n/a	n/a	0.02	0.33	0.9	n/a	n/a	n/a
chr1:155751667:155751832|155751828:+@chr1:155753479:155753625:+	ENSMUSG00000026473	Glul	glutamine synthetase	n/a	n/a	n/a	n/a	n/a	n/a	n/a	0	0.02	0.06	0	0.02	0.06	0	0.02	0.05	0	0.03	0.08	0	0.03	0.1	0	0.03	0.11	0	0.01	0.03	0	0.02	0.06	0	0.01	0.05	0	0	0.02	0	0.03	0.09	0	0.02	0.09	0	0.02	0.06
chr1:187194768:187194924:+@chr1:187196797:187196936:+@chr1:187197997:187198329:+	ENSMUSG00000026615	Eprs	clone:2410081F06 product:BIFUNCTIONAL AMINOACYL-TRNA SYNTHETASE (Fragment).,glutamyl-prolyl-tRNA synthetase,ES cells cDNA, RIKEN full-length enriched library	n/a	n/a	n/a	n/a	n/a	n/a	n/a	0.93	0.98	1	0.91	0.98	1	0.92	0.98	1	0.9	0.97	1	0.8	0.93	1	0.96	0.99	1	0.94	0.98	1	0.96	0.99	1	0.92	0.98	1	0.92	0.98	1	0.89	0.97	1	0.92	0.97	1	0.87	0.96	1
chr13:59637610:59637757:-@chr13:59635306:59635455:-@chr13:59634533:59634600:-	ENSMUSG00000021557	Nna1,Agtpbp1	complete cds., RIKEN full-length enriched library,ATP/GTP binding protein 1 isoform 1,Adult male testis cDNA, clone:1700020N17 product:NUCLEAR ATP/GTP-BINDING PROTEIN homolog (Agtpbp1 protein).,Mus musculus nuclear ATP/GTP-binding protein (Nna1) mRNA	n/a	n/a	n/a	n/a	n/a	n/a	n/a	0	0.02	0.07	0	0.02	0.06	0	0.02	0.09	0	0.02	0.06	0.01	0.05	0.13	0.01	0.04	0.11	0	0.01	0.04	0.01	0.02	0.05	0.06	0.12	0.23	0	0.01	0.02	0	0.04	0.16	0	0.04	0.12	0.01	0.1	0.28
chr12:85953730:85953846:-@chr12:85953395|85953533:85953275:-	ENSMUSG00000021240	Abcd4	sub-family D,ATP-binding cassette, member 4,Abcd4 protein.	-24	0.272727	10.32	0.36	0.23	-0.13	-2.35202	0.06	0.23	0.58	0.27	0.61	0.95	0.07	0.25	0.57	0.28	0.59	0.93	0.04	0.19	0.47	0.08	0.25	0.49	0.01	0.12	0.37	0.32	0.68	0.98	0.34	0.69	0.96	0.35	0.67	0.91	0.14	0.33	0.65	0.19	0.55	0.93	0.23	0.54	0.92
chr2:173916983:173917123:+@chr2:173917903|173917914:173918068:+	ENSMUSG00000027522	Stx16	syntaxin 16 isoform d,syntaxin 16 isoform a,syntaxin 16 isoform c,syntaxin 16 isoform b	-9	-0.464646	6.53709	0.8	0.71	-0.1	-1.30568	0.56	0.84	0.99	0.34	0.72	0.94	0.58	0.85	0.99	0.53	0.84	0.97	0.6	0.85	0.99	0.77	0.92	1	0.59	0.86	0.99	0.58	0.86	0.99	0.7	0.91	0.99	0.8	0.95	1	0.44	0.75	0.99	0.69	0.89	0.99	0.48	0.82	0.99
chr7:144390777:144390965:-@chr7:144390264|144390372:144390175:-	ENSMUSG00000010476	Ebf3	early B-cell factor 3	n/a	n/a	n/a	n/a	n/a	n/a	n/a	0.13	0.33	0.66	0.17	0.37	0.65	0.35	0.62	0.89	0	0.24	0.62	n/a	n/a	n/a	0.18	0.6	0.96	0.09	0.37	0.75	0.3	0.62	0.95	n/a	n/a	n/a	n/a	n/a	n/a	0.17	0.4	0.68	n/a	n/a	n/a	n/a	n/a	n/a
chr9:77961045:77961262:+@chr9:77966077:77966277:+@chr9:77972763:77973463:+	n/a	n/a	n/a	n/a	n/a	n/a	n/a	n/a	n/a	n/a	0.04	0.44	0.9	0.27	0.74	0.97	0.03	0.41	0.93	0.12	0.53	0.92	n/a	n/a	n/a	0.11	0.59	0.96	0.3	0.66	0.95	0.04	0.59	0.99	0.66	0.88	0.99	0.63	0.87	1	0.53	0.81	0.98	0.46	0.8	1	0.14	0.56	0.88
chr11:116725220:116725260:+@chr11:116727205:116727270:+	n/a	n/a	n/a	3	0.161616	3.69741	0.06	0.06	0	0.767668	0.05	0.09	0.16	0.03	0.04	0.07	0.03	0.05	0.08	0.04	0.07	0.1	0.01	0.03	0.06	0.05	0.1	0.18	0.05	0.08	0.12	0.02	0.04	0.05	0.06	0.09	0.13	0.04	0.05	0.08	0.07	0.11	0.17	0.06	0.11	0.18	0.06	0.1	0.15
chr9:22039464:22039590:+@chr9:22040472|22040646:22040738:+	ENSMUSG00000057982	Zfp809	zinc finger protein 809	34	1.29293	16.3159	0.32	0.56	0.24	2.00462	0.25	0.41	0.61	0.09	0.2	0.4	0.17	0.35	0.58	0.08	0.24	0.47	0.27	0.5	0.78	0.09	0.24	0.45	0.12	0.24	0.41	0.11	0.22	0.36	0.03	0.1	0.22	0.09	0.16	0.27	0.06	0.17	0.35	0.07	0.26	0.52	0.16	0.34	0.56
chr18:12909169:12910337:+@chr18:12912853:12912972:+@chr18:12913573:12913655:+	ENSMUSG00000024430	Cabyr	calcium-binding tyrosine-phosphorylation	n/a	n/a	n/a	n/a	n/a	n/a	n/a	n/a	n/a	n/a	0.41	0.82	1	0.16	0.56	0.98	0.03	0.45	0.91	0.2	0.58	0.92	n/a	n/a	n/a	0.23	0.64	0.95	0.01	0.33	0.85	0.05	0.52	0.96	0.19	0.57	0.9	n/a	n/a	n/a	n/a	n/a	n/a	n/a	n/a	n/a
chr15:36532740:36532610|36532601:-@chr15:36531070:36531164:-	ENSMUSG00000022283	Pabpc1	Adult male liver cDNA, cytoplasmic 1, RIKEN full-length enriched library,poly A binding protein, clone:1300015A08 product:poly A binding protein, full insert sequence.	n/a	n/a	n/a	n/a	n/a	n/a	n/a	0.92	0.98	1	0.9	0.97	1	0.87	0.96	1	0.94	0.98	1	0.93	0.97	1	0.95	0.98	1	0.97	0.99	1	0.95	0.99	1	0.97	0.99	1	0.97	0.99	1	0.92	0.98	1	0.96	0.99	1	0.95	0.98	1
chr11:70758705:70758863:-@chr11:70758438|70758472:70758347:-	ENSMUSG00000040667	Nup88	nucleoporin 88 isoform 1,Mus musculus mRNA for 88kDa nucleoporin protein (Nup88 gene).	n/a	n/a	n/a	n/a	n/a	n/a	n/a	0.77	0.93	1	0.75	0.91	0.99	0.75	0.91	0.99	0.86	0.95	0.99	0.9	0.97	1	0.85	0.95	0.99	0.85	0.96	1	0.75	0.92	1	0.68	0.87	0.99	0.8	0.94	0.99	0.79	0.95	1	0.74	0.9	0.99	0.67	0.89	0.99
chr17:80680536:80680768:-@chr17:80680260:80680424:-@chr17:80677559:80677721:-	ENSMUSG00000035051	Dhx57	full insert sequence.,DEAH (Asp-Glu-Ala-Asp/His) box polypeptide 57, RIKEN full-length enriched library, clone:E130116A07 product:weakly similar to ATP DEPENDENT HELICASE (FRAGMENT) [Talaromyces emersonii],Mus musculus 0 day neonate eyeball cDNA	n/a	n/a	n/a	n/a	n/a	n/a	n/a	0.06	0.3	0.65	0.01	0.09	0.3	0.01	0.13	0.44	0.01	0.09	0.38	0	0.08	0.28	n/a	n/a	n/a	0.01	0.05	0.17	0	0.03	0.12	0.09	0.26	0.49	0.11	0.3	0.54	0.06	0.31	0.76	0.01	0.18	0.48	0.03	0.19	0.45
chr4:155214887:155214907:+@chr4:155215015|155215024:155215317:+	ENSMUSG00000029070	Mxra8,asp3	Mus musculus asp3 mRNA for adipocyte-specific protein 3, complete cds.,matrix-remodelling associated 8	-8	1.19192	8.71742	0.62	0.39	-0.24	-1.05443	0.42	0.72	0.98	0.29	0.69	0.99	0.13	0.46	0.84	0.02	0.27	0.69	0.02	0.47	0.89	0.04	0.49	0.88	0.09	0.34	0.64	0.8	0.93	0.99	0.14	0.49	0.82	0.11	0.48	0.86	0.21	0.52	0.87	0.23	0.56	0.89	0.18	0.69	0.98
chr6:22278678:22278557|22278555:-@chr6:22272290:22272348:-	ENSMUSG00000029672	D6Wsu176e	D6Wsu176e protein	n/a	n/a	n/a	n/a	n/a	n/a	n/a	0.7	0.91	0.99	0.55	0.83	0.98	0.47	0.81	0.98	0.45	0.8	0.99	0.31	0.76	0.96	0.81	0.94	1	0.86	0.95	1	0.68	0.87	1	0.68	0.91	0.99	0.79	0.94	1	0.46	0.84	0.98	0.39	0.81	0.98	0.38	0.73	0.95
chr17:21703942:21704209:+@chr17:21706013|21706031:21706091:+	ENSMUSG00000067931	BC049807	hypothetical protein LOC381066	n/a	n/a	n/a	n/a	n/a	n/a	n/a	0.14	0.54	0.98	0.09	0.67	0.98	0.01	0.31	0.88	0.03	0.55	0.89	n/a	n/a	n/a	0.13	0.5	0.93	0.2	0.71	0.97	0.05	0.47	0.91	0.02	0.33	0.89	0.14	0.58	0.92	0.12	0.53	0.96	0.37	0.76	0.97	0.26	0.7	0.97
chr17:34994164:34994264:-@chr17:34994077|34994081:34993949:-	ENSMUSG00000024371	n/a	complement factor B	n/a	n/a	n/a	n/a	n/a	n/a	n/a	n/a	n/a	n/a	0.22	0.73	1	n/a	n/a	n/a	0.26	0.72	0.97	n/a	n/a	n/a	n/a	n/a	n/a	n/a	n/a	n/a	n/a	n/a	n/a	n/a	n/a	n/a	n/a	n/a	n/a	n/a	n/a	n/a	n/a	n/a	n/a	n/a	n/a	n/a
chr1:64605077:64605223:+@chr1:64606301:64606342:+@chr1:64608327:64608439:+@chr1:64612791:64612891:+	ENSMUSG00000025958	Creb1	cAMP responsive element binding protein 1	n/a	n/a	n/a	n/a	n/a	n/a	n/a	0.31	0.84	0.99	0.38	0.84	1	0.4	0.83	0.99	0.36	0.82	0.99	0.43	0.82	0.99	0.26	0.6	0.94	0.53	0.86	0.99	0.48	0.83	0.97	0.59	0.87	0.99	0.83	0.94	1	0.33	0.8	0.98	0.61	0.89	1	0.25	0.62	0.94
chr15:78914542:78914717|78914713:+@chr15:78915987:78916141:+	ENSMUSG00000033047	Eif3eip	eukaryotic translation initiation factor 3	n/a	n/a	n/a	n/a	n/a	n/a	n/a	0	0.04	0.11	0.01	0.04	0.11	0	0.05	0.16	0	0.06	0.15	0.01	0.1	0.27	0	0.05	0.14	0	0.03	0.07	0	0.05	0.14	0	0.12	0.35	0.01	0.06	0.18	0	0.03	0.09	0	0.04	0.14	0.01	0.06	0.17
chr2:29534653:29534789:+@chr2:29535257:29535370:+@chr2:29541625:29541803:+	ENSMUSG00000039844	Rapgef1	Rap guanine nucleotide exchange factor (GEF) 1	18	0.0505051	15.8684	0.4	0.55	0.15	1.13115	0.26	0.36	0.48	0.25	0.34	0.45	0.39	0.5	0.63	0.71	0.87	0.99	0.21	0.37	0.58	0.15	0.27	0.43	0.32	0.41	0.52	0.25	0.33	0.41	0.25	0.34	0.45	0.15	0.19	0.25	0.4	0.54	0.67	0.23	0.37	0.54	0.43	0.62	0.79
chr10:30313921:30313994:-@chr10:30310827:30310908:-@chr10:30310649:30310741:-	ENSMUSG00000019792	Trmt11	Putative RNA methylase C6orf75 homolog (EC 2.1.1.-).	n/a	n/a	n/a	n/a	n/a	n/a	n/a	n/a	n/a	n/a	n/a	n/a	n/a	n/a	n/a	n/a	n/a	n/a	n/a	n/a	n/a	n/a	0.54	0.84	0.98	0.54	0.8	0.95	0.62	0.86	1	0.47	0.8	0.98	0.59	0.86	0.98	n/a	n/a	n/a	n/a	n/a	n/a	n/a	n/a	n/a
chr19:23292895:23293020:-@chr19:23289645:23289689:-@chr19:23289040:23289230:-	ENSMUSG00000024943	Smc5	structural maintenance of chromosomes 5	49	-0.868687	13.7177	0.57	0.91	0.34	3.63536	0.34	0.59	0.82	0.27	0.52	0.75	0.31	0.61	0.86	0.32	0.53	0.73	0.3	0.65	0.93	0.11	0.33	0.57	0.36	0.59	0.83	0.21	0.42	0.62	0.25	0.54	0.78	0.28	0.56	0.82	0.06	0.38	0.79	0.18	0.42	0.66	0.36	0.58	0.8
chr4:138362100:138362149:-@chr4:138360422:138360566:-@chr4:138357267:138357373:-	ENSMUSG00000041193	Pla2g5	phospholipase A2, group V	3	2.38384	9.70963	0.93	0.79	-0.14	0.0634588	0.85	0.95	1	0.75	0.91	1	0.78	0.92	1	0.9	0.97	1	0.74	0.91	0.99	0.83	0.95	0.99	0.83	0.94	1	0.51	0.68	0.89	0.51	0.71	0.91	0.25	0.35	0.46	0.63	0.84	0.97	0.8	0.93	0.99	0.78	0.91	0.98
chr8:128259968:128260130|128260125:+@chr8:128261223:128261319:+	ENSMUSG00000031851	2310079N02Rik	15 days embryo head cDNA, RIKEN full-length enriched library	n/a	n/a	n/a	n/a	n/a	n/a	n/a	0.7	0.89	0.99	0.64	0.89	0.99	0.36	0.78	0.98	0.08	0.54	0.98	0	0.42	0.88	0.16	0.55	0.96	0.42	0.73	0.95	0.15	0.49	0.8	0.1	0.53	0.98	0.07	0.55	0.97	0.4	0.8	0.99	0.2	0.67	0.97	0.13	0.51	0.92
chr2:91103444:91103580:+@chr2:91103922:91104043:+@chr2:91104348:91104845:+	ENSMUSG00000027257	Pacsin3	protein kinase C and casein kinase substrate in	-10	0.606061	8.36638	0.98	0.91	-0.07	-1.2677	0.96	0.99	1	0.94	0.98	1	0.95	0.98	1	0.91	0.97	1	0.9	0.98	1	0.96	0.98	1	0.94	0.98	1	0.92	0.97	1	0.89	0.96	1	0.87	0.96	1	0.93	0.98	1	0.87	0.96	0.99	0.94	0.98	1
chr14:79751180:79751308:-@chr14:79750496:79750637:-@chr14:79744702:79744915:-	ENSMUSG00000022020	Narg1l	NMDA receptor regulated 1-like	-10	0.474747	9.75492	0.65	0.38	-0.27	-1.07379	0.3	0.71	0.96	0.3	0.52	0.81	0.42	0.73	0.93	0.11	0.54	0.94	0.01	0.17	0.51	0.2	0.54	0.91	0.16	0.37	0.68	0.04	0.17	0.41	0.02	0.14	0.33	0.05	0.29	0.59	0.31	0.62	0.9	0.14	0.36	0.66	0.14	0.34	0.7
chr8:13105718:13105903:+@chr8:13106194:13106309:+@chr8:13115470:13117748:+	ENSMUSG00000031446	Cul4a	clone:G730036I24 product:cullin 4A, RIKEN full-length enriched library, clone:1110014C11 product:CULLIN 4A homolog [Homo sapiens], full insert sequence.,Mus musculus lung RCB-0558 LLC cDNA,Mus musculus 18-day embryo whole body cDNA,cullin 4A	n/a	n/a	n/a	n/a	n/a	n/a	n/a	0.96	0.99	1	0.96	0.99	1	0.96	0.98	1	0.91	0.97	1	0.91	0.97	1	0.94	0.98	1	0.96	0.99	1	0.95	0.99	1	0.93	0.98	1	0.96	0.99	1	0.97	0.99	1	0.96	0.98	1	0.95	0.98	1
chr3:97705113:97705343:+@chr3:97711144|97711148:97711253:+	ENSMUSG00000027879	Sec22b	clone:2410003J18 product:SEC22 vesicle trafficking protein-like 1 (S. cerevisiae), full insert sequence.,SEC22 vesicle trafficking protein-like 1,Mus musculus ES cells cDNA, RIKEN full-length enriched library	n/a	n/a	n/a	n/a	n/a	n/a	n/a	0.76	0.93	1	0.75	0.9	0.98	0.43	0.81	0.97	0.09	0.55	0.94	0.38	0.76	0.99	0.53	0.86	0.99	0.84	0.95	0.99	0.7	0.86	0.98	0.3	0.72	0.94	0.54	0.81	0.98	0.58	0.85	0.99	0.65	0.88	0.99	0.37	0.68	0.98
chr16:38742376:38742481:+@chr16:38751249:38751315:+@chr16:38752115:38752512:+	ENSMUSG00000022793	B4galt4	UDP-Gal:betaGlcNAc beta, complete cds.,4-galactosyltransferase IV mRNA,Mus musculus beta-1	n/a	n/a	n/a	n/a	n/a	n/a	n/a	0.03	0.26	0.69	0.01	0.12	0.35	0.04	0.39	0.86	0	0.19	0.9	0	0.25	0.76	0.01	0.22	0.79	0.01	0.15	0.47	0.01	0.14	0.5	0.02	0.31	0.83	0.08	0.4	0.87	0.01	0.18	0.48	0.04	0.3	0.88	0.04	0.47	0.9
chr18:30495748:30495838|30495784:+@chr18:30503605:30503730:+	ENSMUSG00000033628	Pik3c3	phosphoinositide-3-kinase	n/a	n/a	n/a	n/a	n/a	n/a	n/a	0.72	0.91	0.98	0.55	0.83	0.99	0.62	0.88	0.99	0.46	0.77	0.98	0.53	0.81	0.99	0.45	0.78	0.99	0.72	0.92	0.99	0.44	0.76	0.99	0.46	0.76	0.97	0.63	0.88	0.99	0.5	0.8	0.98	0.33	0.72	0.96	0.65	0.89	0.99
chr18:10596337:10596439:-@chr18:10595674:10595873:-@chr18:10588437:10588548:-	ENSMUSG00000024293	Esco1,mKIAA1911	clone:A930014I12 product:unclassifiable,establishment of cohesion 1 homolog 1,Mus musculus adult retina cDNA, full insert sequence., RIKEN full-length enriched library	-6	0.777778	6.95375	0.51	0.69	0.18	-0.974694	0.16	0.48	0.85	0.07	0.45	0.97	0.14	0.6	0.96	0.17	0.5	0.97	0.53	0.83	0.97	0.3	0.63	0.9	0.56	0.82	0.99	0.45	0.71	0.95	0.53	0.79	0.97	0.6	0.83	0.98	0.28	0.64	0.99	0.52	0.87	0.99	0.82	0.96	1
chr1:75312324:75312194|75312190:-@chr1:75311893:75311995:-	ENSMUSG00000026209	Dnpep	full insert sequence., clone:D230033J10 product:aspartyl aminopeptidase,12 days embryo eyeball cDNA,aspartyl aminopeptidase, RIKEN full-length enriched library	n/a	n/a	n/a	n/a	n/a	n/a	n/a	0	0.04	0.13	0	0.03	0.09	0	0.02	0.08	0	0.04	0.15	0.01	0.07	0.21	0.01	0.05	0.15	0	0.02	0.08	0	0.02	0.07	0	0.03	0.09	0	0.03	0.07	0	0.03	0.08	0.01	0.09	0.31	0	0.06	0.2
chr4:115828701:115828826:+@chr4:115830498:115830562:+@chr4:115830757:115830801:+	ENSMUSG00000028700	Pomgnt1	protein O-linked mannose	n/a	n/a	n/a	n/a	n/a	n/a	n/a	0.92	0.97	1	0.9	0.97	1	0.89	0.97	1	0.95	0.99	1	0.82	0.95	1	0.91	0.97	1	0.91	0.97	1	0.89	0.97	1	0.61	0.86	1	0.76	0.91	0.99	0.91	0.97	1	0.81	0.93	0.99	0.85	0.95	1
chr4:148703494:148703846:-@chr4:148702531:148702585:-	n/a	n/a	n/a	12	0.161616	24.1785	0.51	0.75	0.24	0.489624	0.45	0.55	0.66	0.44	0.53	0.64	0.38	0.45	0.55	0.44	0.53	0.62	0.72	0.89	0.98	0.63	0.77	0.92	0.56	0.66	0.76	0.7	0.83	0.95	0.89	0.97	1	0.95	0.99	1	0.4	0.49	0.58	0.42	0.53	0.66	0.45	0.56	0.7
chr11:6339379:6339456:-@chr11:6333727:6333840:-@chr11:6329094:6329228:-	ENSMUSG00000041126	H2afv,H2afz	H2afv protein.,H2A histone family, member Z	-24	0.353535	16.9171	0.95	0.69	-0.26	-1.43958	0.82	0.89	0.94	0.93	0.98	1	0.92	0.97	1	0.57	0.7	0.83	0.39	0.53	0.7	0.68	0.83	0.94	0.85	0.93	0.98	0.86	0.92	0.96	0.93	0.97	1	0.86	0.92	0.96	0.85	0.91	0.96	0.83	0.93	0.99	0.75	0.91	0.99
chr17:25372650:25372733:-@chr17:25372479:25372572:-	n/a	n/a	n/a	1	0.414141	4.38549	0.13	0.05	-0.08	0.13359	0.04	0.16	0.37	0.02	0.14	0.34	0.02	0.1	0.22	0.01	0.09	0.26	0	0.13	0.63	0	0.03	0.1	0	0.04	0.14	0	0.05	0.17	0.01	0.07	0.25	0.03	0.11	0.27	0.14	0.28	0.51	0.13	0.31	0.54	0.02	0.11	0.29
chr2:121732434:121732514:+@chr2:121736535:121736633:+@chr2:121737607:121737777:+	ENSMUSG00000060227	Casc4	cancer susceptibility candidate 4 isoform 2,cancer susceptibility candidate 4 isoform 1	n/a	n/a	n/a	n/a	n/a	n/a	n/a	0.68	0.89	0.98	n/a	n/a	n/a	0.57	0.84	0.99	0.63	0.87	0.99	n/a	n/a	n/a	0.38	0.69	0.93	0.6	0.87	0.99	0.38	0.7	0.96	0.49	0.81	0.99	0.56	0.84	0.98	n/a	n/a	n/a	n/a	n/a	n/a	n/a	n/a	n/a
chr11:70458852:70458942:-@chr11:70458672:70458771:-	n/a	n/a	n/a	20	-0.0606061	10.3239	0.01	0.05	0.04	1.94313	0.01	0.02	0.02	0.01	0.01	0.02	0.01	0.01	0.02	0	0.01	0.02	0	0.01	0.02	0.01	0.02	0.03	0	0.01	0.01	0.01	0.02	0.02	0.01	0.02	0.03	0.01	0.02	0.03	0	0.01	0.02	0	0.01	0.02	0.01	0.03	0.05
chr8:129489282:129489522:-@chr8:129485812:129485871:-@chr8:129483442:129483485:-	ENSMUSG00000033931	Rbm34	RNA binding motif protein 34	1	0.30303	3.89367	0.23	0.33	0.1	0.179001	0	0.17	0.72	0.04	0.27	0.58	0.03	0.26	0.81	0.03	0.17	0.54	0.22	0.62	0.95	0.01	0.19	0.58	0.13	0.34	0.56	0.09	0.22	0.41	0.01	0.1	0.28	0.01	0.16	0.43	0.01	0.08	0.38	0.02	0.1	0.27	0.02	0.13	0.4
chr4:33530576:33530642:+@chr4:33569666:33569749:+@chr4:33585926:33586073:+	ENSMUSG00000028274	Rngtt	RNA guanylyltransferase and 5'-phosphatase	n/a	n/a	n/a	n/a	n/a	n/a	n/a	0.01	0.18	0.6	0.01	0.14	0.42	n/a	n/a	n/a	0.01	0.12	0.46	0.05	0.26	0.75	0.01	0.1	0.38	0	0.07	0.25	0.01	0.07	0.2	0.01	0.29	0.94	0	0.06	0.21	0.03	0.3	0.71	0.03	0.23	0.64	0	0.06	0.23
chr11:69376938:69376822|69376806:-@chr11:69376151:69376359:-	ENSMUSG00000041346	Wdr79	WD repeat domain 79	n/a	n/a	n/a	n/a	n/a	n/a	n/a	0.23	0.61	0.98	0.53	0.84	0.99	0.33	0.75	0.98	0.11	0.55	0.87	n/a	n/a	n/a	n/a	n/a	n/a	0.42	0.75	0.97	0.13	0.58	0.96	0.39	0.74	0.95	n/a	n/a	n/a	0.03	0.53	0.87	n/a	n/a	n/a	n/a	n/a	n/a
chr7:63055999:63056134|63056067:+@chr7:63059951:63060065:+	ENSMUSG00000033790	Tubgcp5	tubulin, gamma complex associated protein 5	n/a	n/a	n/a	n/a	n/a	n/a	n/a	0.63	0.87	1	0.61	0.86	0.99	n/a	n/a	n/a	0.7	0.9	0.99	n/a	n/a	n/a	0.63	0.86	1	0.75	0.91	0.99	0.94	0.98	1	0.89	0.96	0.99	0.92	0.97	1	n/a	n/a	n/a	0.66	0.88	1	n/a	n/a	n/a
chr15:76428406:76428522:-@chr15:76428310|76428330:76428240:-	ENSMUSG00000034022	Cpsf1	complete cds.,Mus musculus cleavage and polyadenylation specificity factor 1 (Cpsf1) mRNA,cleavage and polyadenylation specific factor 1	n/a	n/a	n/a	n/a	n/a	n/a	n/a	0.65	0.88	1	0.58	0.84	0.97	0.25	0.56	0.89	0.77	0.92	0.99	0.42	0.77	0.95	0.85	0.95	1	0.81	0.92	0.98	0.62	0.89	1	0.56	0.86	0.99	0.79	0.92	1	0.67	0.91	0.99	0.55	0.83	0.98	0.53	0.82	1
chr2:6051088:6051257:-@chr2:6050674:6050875:-@chr2:6034441:6035159:-	n/a	n/a	n/a	n/a	n/a	n/a	n/a	n/a	n/a	n/a	0.21	0.53	0.91	0.21	0.59	0.92	0.08	0.46	0.98	0.11	0.44	0.84	0.01	0.35	0.95	0.01	0.33	0.89	0.48	0.77	0.95	0.56	0.8	0.95	0.06	0.35	0.65	0.15	0.35	0.58	0.59	0.83	0.96	0.39	0.69	0.9	0.24	0.59	0.95
chr1:71644948:71645037:-@chr1:71644246|71644321:71643855:-	ENSMUSG00000026193	n/a	RIKEN full-length enriched library,Mus musculus 2 days pregnant adult female ovary cDNA, clone:E330027I09 product:fibronectin 1, clone:G431002M24 product:fibronectin 1,Mus musculus bone marrow stroma cell CRL-2028 SR-4987 cDNA, full insert sequence.,Fn1 protein.,fibronectin 1	8	-0.373737	9.3653	0.81	0.78	-0.03	0.894124	0.51	0.69	0.86	0.76	0.9	0.98	0.56	0.84	0.99	0.44	0.65	0.83	0.53	0.79	0.99	0.2	0.36	0.54	0.55	0.74	0.92	0.6	0.74	0.89	0.75	0.86	0.96	0.72	0.84	0.94	0.58	0.75	0.88	0.48	0.67	0.81	0.37	0.65	0.88
chr4:99480749:99480791:-@chr4:99468788:99468923:-@chr4:99456292:99456370:-	ENSMUSG00000028549	Itgb3bp	Centromere protein R (CENP-R) (Nuclear receptor-interacting factor 3).,integrin beta 3 binding protein	n/a	n/a	n/a	n/a	n/a	n/a	n/a	0.11	0.53	0.93	n/a	n/a	n/a	n/a	n/a	n/a	0.05	0.2	0.47	0.1	0.24	0.43	0	0.1	0.31	0.3	0.56	0.82	0.12	0.5	0.95	0.04	0.18	0.38	0.1	0.47	0.85	0.18	0.59	0.96	0.48	0.81	0.98	0.15	0.71	0.99
chr6:128366275:128366316:-@chr6:128365914:128366082:-@chr6:128364163:128364302:-	ENSMUSG00000001518	Itfg2	Osteoclast-like cell cDNA, RIKEN full-length enriched library,integrin alpha FG-GAP repeat containing 2,Mus musculus adult male medulla oblongata cDNA, full insert sequence., clone:6330505C02 product:Uncharacterized hematopoietic stem/progenitor cells protein MDS028 homolog [Homo sapiens], clone:I420026L14 product:Uncharacterized hematopoietic stem/progenitor cells protein MDS028 homolog.	n/a	n/a	n/a	n/a	n/a	n/a	n/a	0.74	0.92	1	0.65	0.85	0.99	0.67	0.86	0.98	0.7	0.88	0.99	0.6	0.84	0.98	0.55	0.84	0.98	0.65	0.89	1	0.81	0.94	1	0.77	0.92	0.99	0.78	0.92	1	0.62	0.84	0.97	0.53	0.81	0.97	0.4	0.77	0.98
chr11:102146245:102146402:+@chr11:102148894|102148971:102149185:+	ENSMUSG00000034757	Tmub2	transmembrane and ubiquitin-like domain	n/a	n/a	n/a	n/a	n/a	n/a	n/a	0.8	0.94	1	0.75	0.92	0.99	0.71	0.9	0.99	0.77	0.92	1	0.44	0.75	0.99	0.73	0.89	0.99	0.89	0.96	0.99	0.87	0.95	0.99	0.92	0.97	1	0.94	0.98	1	0.64	0.85	0.98	0.71	0.9	0.99	0.82	0.94	1
chr11:64811843:64811881:+@chr11:64811995|64812010:64812119:+	ENSMUSG00000020549	Elac2	elaC homolog 2	n/a	n/a	n/a	n/a	n/a	n/a	n/a	0.01	0.14	0.64	0.03	0.18	0.47	0.02	0.12	0.37	0.01	0.13	0.4	0.02	0.21	0.54	0.05	0.28	0.62	0.01	0.11	0.28	0.08	0.26	0.62	0.02	0.25	0.64	n/a	n/a	n/a	0.02	0.13	0.43	0.03	0.3	0.73	0.02	0.14	0.43
chr7:148496661:148497356:-@chr7:148487499:148487588:-@chr7:148483070:148483515:-	ENSMUSG00000058886	Deaf1	deformed epidermal autoregulatory factor 1, complete cds.,Mus musculus deformed epidermal autoregulatory factor 1 mRNA	n/a	n/a	n/a	n/a	n/a	n/a	n/a	0.62	0.85	0.98	0.36	0.68	0.96	0.57	0.86	1	0.67	0.86	1	0.67	0.89	1	0.63	0.88	1	0.71	0.86	0.96	0.53	0.83	0.98	0.55	0.8	0.98	0.58	0.86	1	0.59	0.81	0.96	0.42	0.75	0.96	0.31	0.7	0.97
chr11:59264177:59267147:+@chr11:59267330|59267380:59267561:+	ENSMUSG00000036819	Jmjd4	Mus musculus adult male olfactory brain cDNA, full insert sequence., clone:6430559I23 product:hypothetical jmjC domain containing protein, RIKEN full-length enriched library,jumonji domain containing 4	7	-1.05051	9.20515	0.4	0.49	0.1	0.874565	0.26	0.65	0.9	0.01	0.23	0.64	0.06	0.31	0.66	0.29	0.62	0.95	0.1	0.5	0.99	0.03	0.24	0.58	0.59	0.78	0.93	0.24	0.52	0.83	0.07	0.5	0.97	0.08	0.33	0.79	0.08	0.32	0.63	0.33	0.71	0.99	0.18	0.48	0.83
chr11:79064483:79065564:-@chr11:79061893:79062015:-@chr11:79059672:79059803:-	ENSMUSG00000017677	Wsb1	WD repeat and SOCS box-containing 1 isoform 1,WD repeat and SOCS box-containing 1 isoform 2	n/a	n/a	n/a	n/a	n/a	n/a	n/a	0.78	0.93	1	0.63	0.87	0.98	0.17	0.58	0.94	0.68	0.89	0.98	0.86	0.96	1	0.71	0.92	0.99	0.79	0.94	0.99	0.84	0.95	1	0.79	0.93	1	0.82	0.94	0.99	0.7	0.92	1	0.78	0.93	1	0.76	0.92	0.99
chr19:29432807:29432893:-@chr19:29424850:29424959:-@chr19:29423083:29423495:-	ENSMUSG00000016495	5033414D02Rik	hypothetical protein LOC67759, full insert sequence., clone:1110007H22 product:similar to UNCHARACTERIZED HEMATOPOIETIC STEM/PROGENITOR CELLS PROTEIN MDS030 [Homo sapiens],Mus musculus 18-day embryo whole body cDNA, RIKEN full-length enriched library	n/a	n/a	n/a	n/a	n/a	n/a	n/a	0.76	0.89	0.97	0.79	0.9	0.97	0.73	0.88	0.97	0.75	0.9	0.99	0.79	0.93	0.99	0.7	0.85	0.96	0.82	0.94	0.99	0.61	0.83	0.98	0.37	0.58	0.78	0.58	0.74	0.87	0.71	0.87	0.96	0.73	0.91	1	0.58	0.77	0.94
chr11:32542555:32542935:+@chr11:32552748:32552904:+@chr11:32608188:32608250:+	ENSMUSG00000020271	mKIAA0696	Mus musculus mRNA for mKIAA0696 protein.	1	-1.0202	6.0586	0.62	0.8	0.17	0.333444	0.5	0.77	0.96	0.2	0.49	0.77	0.28	0.61	1	0.7	0.9	0.99	0.4	0.68	0.93	0.39	0.66	0.88	0.69	0.87	0.97	0.35	0.67	0.92	0.64	0.85	0.97	0.54	0.79	0.94	0.14	0.39	0.66	0.48	0.72	0.91	0.34	0.7	0.95
chr3:31012330:31012562|31012424:+@chr3:31015738:31015961:+	ENSMUSG00000027660	Skil	SKI-like isoform b,SKI-like isoform a	-3	-0.151515	4.23636	0.37	0.29	-0.07	-0.67239	0.27	0.51	0.81	0.08	0.26	0.54	0.14	0.33	0.58	0.15	0.48	0.87	0.15	0.42	0.77	0.27	0.52	0.88	0.16	0.29	0.53	0.17	0.46	0.76	0.13	0.33	0.6	0.19	0.43	0.72	0.05	0.17	0.41	0.12	0.26	0.45	0.14	0.32	0.58
chr7:29692083:29691991|29691987:-@chr7:29690244:29690474:-	ENSMUSG00000054808	Actn4	actinin alpha 4	n/a	n/a	n/a	n/a	n/a	n/a	n/a	0	0.04	0.16	0	0.03	0.07	0	0.05	0.14	0	0.03	0.1	0.01	0.06	0.17	0	0.03	0.09	0	0.02	0.09	0	0.03	0.11	0	0.04	0.12	0.01	0.07	0.18	0	0.04	0.1	0	0.05	0.14	0.02	0.12	0.35
chr10:95453034:95453099:+@chr10:95455864|95456058:95456097:+	ENSMUSG00000036499	Eea1	early endosome antigen 1	-7	-0.161616	5.56088	0.24	0.07	-0.17	-1.22973	0.02	0.12	0.55	0	0.06	0.2	0.17	0.54	0.92	0.06	0.18	0.37	0.01	0.14	0.43	0.02	0.18	0.54	0.02	0.07	0.17	0.02	0.06	0.13	0.04	0.1	0.21	0.05	0.11	0.21	0.02	0.25	0.95	0	0.03	0.09	0.04	0.12	0.23
chr17:24734150:24734231:-@chr17:24734008|24734082:24733991:-	ENSMUSG00000002496	Tsc2	ES cells cDNA, clone:C330041B05 product:tuberous sclerosis 2, RIKEN full-length enriched library	-6	0.141414	11.3849	0.81	0.78	-0.03	-0.539434	0.7	0.85	0.96	0.49	0.67	0.92	0.75	0.9	0.98	0.79	0.93	0.99	0.38	0.57	0.77	0.4	0.69	0.91	0.74	0.86	0.95	0.82	0.93	0.99	0.47	0.65	0.84	0.5	0.73	0.95	0.46	0.64	0.85	0.53	0.78	0.99	0.42	0.67	0.95
chr10:75735278:75735448:-@chr10:75734121:75734150:-@chr10:75733141:75733202:-	ENSMUSG00000020231	Dip2a,mKIAA0184	Mus musculus mRNA for mKIAA0184 protein.,disco interacting protein 2 homolog	n/a	n/a	n/a	n/a	n/a	n/a	n/a	0	0.12	0.38	0	0.11	0.31	0.02	0.23	0.59	0.03	0.2	0.49	0.03	0.28	0.85	0.01	0.2	0.55	0.04	0.3	0.79	0	0.2	0.6	0.01	0.26	0.63	0.05	0.24	0.58	0.03	0.23	0.67	n/a	n/a	n/a	0.05	0.29	0.74
chr9:36533382:36534147:-@chr9:36531382:36531605:-@chr9:36530346:36530410:-	ENSMUSG00000032113	Chek1	checkpoint kinase 1 homolog,Serine/threonine-protein kinase Chk1 (EC 2.7.11.1).	n/a	n/a	n/a	n/a	n/a	n/a	n/a	n/a	n/a	n/a	n/a	n/a	n/a	n/a	n/a	n/a	n/a	n/a	n/a	n/a	n/a	n/a	n/a	n/a	n/a	n/a	n/a	n/a	n/a	n/a	n/a	n/a	n/a	n/a	n/a	n/a	n/a	n/a	n/a	n/a	n/a	n/a	n/a	n/a	n/a	n/a
chr6:92890323:92890803:+@chr6:92910444:92910595:+@chr6:92968524:92968585:+@chr6:93057061:93057335:+	n/a	n/a	n/a	1	-0.0909091	0.888659	0.47	0.54	0.07	1.22759	0.02	0.32	0.75	0.13	0.58	0.99	0.1	0.5	0.92	0.04	0.37	0.81	0.16	0.52	0.98	0.23	0.61	0.91	0.08	0.43	0.82	0.05	0.39	0.89	0.06	0.37	0.78	0.11	0.36	0.75	0.04	0.3	0.82	0.08	0.53	0.95	0.18	0.65	0.93
chr12:73053439:73053546:+@chr12:73059734:73059760:+@chr12:73060793:73060899:+	ENSMUSG00000034574	Daam1	dishevelled associated activator of	22	-0.252525	10.0477	0.13	0.36	0.23	2.21469	0.02	0.09	0.21	0.06	0.19	0.4	0.01	0.11	0.3	0.04	0.13	0.27	0.02	0.12	0.28	0.01	0.04	0.11	0.01	0.05	0.13	0.01	0.08	0.23	0	0.02	0.06	0.01	0.05	0.11	0	0.06	0.2	0.03	0.12	0.31	0	0.1	0.3
chr6:93647188:93647481:-@chr6:93644002:93644202:-@chr6:93636571:93636869:-	ENSMUSG00000045095	Magi1	membrane associated guanylate kinase, WW and PDZ	3	-0.232323	1.95829	0.58	0.79	0.21	1.65058	0.35	0.57	0.83	0.24	0.47	0.73	0.4	0.7	0.95	0.37	0.75	0.98	0.26	0.62	0.94	0.59	0.79	0.98	0.37	0.69	0.96	0.61	0.87	0.99	0.47	0.78	0.97	0.5	0.75	0.96	0.41	0.72	0.98	0.2	0.59	0.92	0.34	0.75	0.99
chr7:26443652:26444000:-@chr7:26434247:26434297:-@chr7:26426663:26426845:-	ENSMUSG00000060376	Bckdha	branched chain ketoacid dehydrogenase E1	n/a	n/a	n/a	n/a	n/a	n/a	n/a	0	0.02	0.05	0	0.01	0.03	0	0.01	0.03	0	0.01	0.03	0	0.02	0.06	0	0.01	0.03	0.01	0.03	0.05	0.02	0.04	0.06	0	0.02	0.05	0	0.01	0.02	0	0.01	0.03	0	0.01	0.04	0	0.02	0.04
chr5:100512770:100512595|100512593:-@chr5:100506892:100509080:-	ENSMUSG00000050640	BC062109	clone:A930024B09 product:hypothetical protein,Mus musculus adult retina cDNA, full insert sequence., RIKEN full-length enriched library,hypothetical protein LOC231503	n/a	n/a	n/a	n/a	n/a	n/a	n/a	0.06	0.53	0.94	0.23	0.61	0.96	0.12	0.59	0.95	0.06	0.51	0.98	0.56	0.84	0.97	0.03	0.45	0.9	0.39	0.73	0.96	0.14	0.58	0.97	0.05	0.51	0.97	0.22	0.7	0.95	0.05	0.37	0.87	0.03	0.39	0.96	0.02	0.61	1
chr5:149176738:149176827:-@chr5:149163642:149164025:-@chr5:149159729:149159887:-	ENSMUSG00000041313	AK042996,Slc7a1	full insert sequence.,Mus musculus 7 days neonate cerebellum cDNA,solute carrier family 7 (cationic amino acid, clone:A730046J11 product:unclassifiable, RIKEN full-length enriched library	n/a	n/a	n/a	n/a	n/a	n/a	n/a	0.57	0.82	0.98	0.71	0.89	0.98	0.68	0.87	0.98	0.79	0.93	0.99	n/a	n/a	n/a	0.55	0.85	0.99	0.54	0.77	0.96	0.49	0.82	0.98	0.31	0.67	0.91	0.54	0.79	0.98	0.5	0.81	1	0.51	0.77	0.96	n/a	n/a	n/a
chr2:20808733:20808787:-@chr2:20804827:20804856:-@chr2:20801588:20803478:-	ENSMUSG00000036591	Arhgap21	Rho GTPase activating protein 21, complete cds.,Mus musculus Rho GTPase activating protein 21, mRNA (cDNA clone MGC:100159 IMAGE:30639338)	6	-0.606061	5.96931	0.53	0.51	-0.02	1.10667	0.32	0.54	0.75	0.35	0.62	0.94	0.2	0.43	0.68	0.11	0.47	0.92	0.27	0.55	0.86	0.11	0.48	0.99	0.32	0.52	0.71	0.47	0.74	0.94	0.11	0.26	0.52	0.23	0.5	0.76	0.04	0.21	0.56	0.15	0.33	0.52	0.1	0.32	0.64
chr3:113152476:113152594:-@chr3:113152242:113152367:-@chr3:113119637:113119762:-@chr3:113117374:113117597:-	ENSMUSG00000079850	Amy2-1	amylase 2-1	n/a	n/a	n/a	n/a	n/a	n/a	n/a	n/a	n/a	n/a	n/a	n/a	n/a	n/a	n/a	n/a	n/a	n/a	n/a	n/a	n/a	n/a	n/a	n/a	n/a	0.2	0.62	0.96	n/a	n/a	n/a	n/a	n/a	n/a	n/a	n/a	n/a	n/a	n/a	n/a	n/a	n/a	n/a	n/a	n/a	n/a
chr7:127785193:127785249|127785248:+@chr7:127786540:127786664:+	ENSMUSG00000030884	Uqcrc2	ubiquinol cytochrome c reductase core protein 2	n/a	n/a	n/a	n/a	n/a	n/a	n/a	0.99	1	1	0.98	0.99	1	0.97	0.99	1	1	1	1	0.99	1	1	0.99	1	1	0.99	1	1	0.99	1	1	0.98	0.99	1	0.98	0.99	1	0.98	1	1	0.96	0.99	1	0.94	0.98	1
chr13:3477489:3477598:+@chr13:3479155:3479247:+	n/a	na/a	n/a	n/a	n/a	n/a	n/a	n/a	n/a	n/a	n/a	n/a	n/a	n/a	n/a	n/a	n/a	n/a	n/a	n/a	n/a	n/a	n/a	n/a	n/a	n/a	n/a	n/a	n/a	n/a	n/a	n/a	n/a	n/a	0.47	0.76	0.98	n/a	n/a	n/a	n/a	n/a	n/a	n/a	n/a	n/a	n/a	n/a	n/a
chr6:67221881:67222021:+@chr6:67222133|67222151:67222222:+	ENSMUSG00000036371	Serbp1	SERPINE1 mRNA binding protein 1, RIKEN full-length enriched library,Mus musculus adult male lung cDNA, full insert sequence.,Plasminogen activator inhibitor 1 RNA-binding protein (PAI1 RNA- binding protein 1) (PAI-RBP1) (SERPINE1 mRNA-binding protein 1)., clone:1200009K13 product:HYPOTHETICAL RNA BINDING PROTEIN RDA288 homolog [Rattus norvegicus]	-16	0.292929	15.6077	0.45	0.38	-0.07	-1.0439	0.39	0.48	0.56	0.33	0.42	0.5	0.36	0.45	0.54	0.35	0.41	0.47	0.39	0.48	0.59	0.45	0.54	0.64	0.38	0.43	0.49	0.24	0.28	0.33	0.34	0.41	0.47	0.31	0.36	0.41	0.33	0.41	0.49	0.37	0.45	0.54	0.32	0.4	0.49
chr18:4379567:4379739:+@chr18:4380652|4380671:4380885:+	ENSMUSG00000024234	Papd1	9.5 days embryo parthenogenote cDNA,Mus musculus adult male kidney cDNA, RIKEN full-length enriched library, clone:0610027A18 product:RIKEN cDNA 0610027A18 gene, full insert sequence., clone:B130046L03 product:hypothetical protein,PAP associated domain containing 1	-13	0.30303	7.75959	0.77	0.41	-0.36	-1.7144	0.56	0.84	0.97	0.56	0.81	0.96	0.24	0.66	0.96	0.43	0.72	0.93	0.04	0.42	0.97	0.52	0.84	0.98	0.22	0.52	0.86	0.41	0.7	0.92	0.53	0.8	0.97	0.26	0.53	0.84	0.24	0.59	0.94	0.22	0.56	0.87	0.28	0.66	0.96
chr1:121374492:121374700:-@chr1:121372642|121372649:121372472:-	ENSMUSG00000004451	Ralb	v-ral simian leukemia viral oncogene homolog B	n/a	n/a	n/a	n/a	n/a	n/a	n/a	0.58	0.86	1	0.66	0.89	0.99	0.76	0.92	0.99	0.38	0.73	0.99	0.26	0.68	0.99	0.68	0.86	1	0.83	0.94	1	0.74	0.92	1	0.24	0.64	0.94	0.33	0.7	0.97	0.74	0.92	1	0.76	0.92	1	0.84	0.95	0.99
chr12:79895232:79895320:+@chr12:79897853|79898090:79898377:+	ENSMUSG00000021112	Pals1,Mpp5	complete cds.,Mus musculus PALS1 (Pals1) mRNA, palmitoylated 3 (MAGUK p55,membrane protein	-4	-0.353535	10.666	0.66	0.7	0.04	-0.341877	0.43	0.62	0.81	0.4	0.65	0.88	0.47	0.71	0.92	0.62	0.87	0.99	0.12	0.37	0.74	0.56	0.84	0.97	0.83	0.93	0.98	0.56	0.77	0.95	0.59	0.76	0.97	0.75	0.92	1	0.17	0.59	0.98	0.53	0.81	0.98	0.6	0.84	0.99
chr6:5027480:5027615:+@chr6:5033041:5033106:+@chr6:5050432:5050587:+	ENSMUSG00000032827	Ppp1r9a,Neurabin	complete cds.,Mus musculus Neurabin mRNA for neural tissue-specific F-actin binding protein, regulatory (inhibitor),protein phosphatase 1	n/a	n/a	n/a	n/a	n/a	n/a	n/a	0.06	0.37	0.77	n/a	n/a	n/a	0.36	0.7	0.97	0.08	0.33	0.69	0.33	0.7	0.98	0.19	0.52	0.93	0.18	0.5	0.92	0.21	0.6	0.94	0.1	0.29	0.67	0.16	0.43	0.77	0.06	0.45	0.93	0.08	0.49	0.89	n/a	n/a	n/a
chr11:49058695:49059119:+@chr11:49065052:49065176:+@chr11:49074073:49076533:+	ENSMUSG00000020346	Mgat1	mannoside acetylglucosaminyltransferase 1	n/a	n/a	n/a	n/a	n/a	n/a	n/a	0.44	0.59	0.75	0.41	0.54	0.71	0.37	0.53	0.7	0.34	0.44	0.56	0.51	0.69	0.88	0.58	0.72	0.84	0.56	0.69	0.81	0.61	0.71	0.82	0.59	0.7	0.82	0.89	0.93	0.97	0.45	0.6	0.75	0.34	0.52	0.72	0.38	0.55	0.75
chr19:9952618:9952738:-@chr19:9952167:9952286:-	n/a	n/a	n/a	n/a	n/a	n/a	n/a	n/a	n/a	n/a	n/a	n/a	n/a	n/a	n/a	n/a	0.18	0.38	0.69	0	0.03	0.08	n/a	n/a	n/a	n/a	n/a	n/a	0.01	0.06	0.15	0.01	0.03	0.07	0	0.05	0.18	0.01	0.07	0.18	0.01	0.05	0.13	n/a	n/a	n/a	n/a	n/a	n/a
chr4:155106036:155106154|155106150:+@chr4:155107582:155109255:+	ENSMUSG00000029038	Ssu72	Ssu72 RNA polymerase II CTD phosphatase homolog	n/a	n/a	n/a	n/a	n/a	n/a	n/a	0.92	0.97	1	0.86	0.95	0.99	0.83	0.94	1	0.88	0.96	1	0.74	0.93	1	0.79	0.91	0.99	0.85	0.95	0.99	0.91	0.98	1	0.62	0.88	1	0.53	0.85	0.98	0.93	0.98	1	0.76	0.92	0.99	0.76	0.92	1
chr9:44771515:44771447|44771420:-@chr9:44768062:44768222:-	ENSMUSG00000059890	Ube4a	Ube4a protein.,ubiquitination factor E4A	1	0.0505051	1.27425	0.8	0.8	0	0.745141	0.57	0.83	0.99	0.66	0.89	0.99	0.26	0.68	0.96	0.3	0.74	0.97	0.5	0.79	0.98	0.4	0.73	0.98	0.69	0.87	0.98	0.22	0.49	0.8	0.21	0.53	0.85	0.66	0.87	0.99	0.56	0.8	0.94	0.48	0.8	0.97	0.42	0.77	0.97
chr11:94420022:94419954|94419952:-@chr11:94418416:94419671:-	ENSMUSG00000076435	BC018371	hypothetical protein LOC264895	n/a	n/a	n/a	n/a	n/a	n/a	n/a	0	0.04	0.15	0	0.03	0.13	0	0.04	0.13	0	0.14	0.36	0.01	0.06	0.2	0	0.09	0.26	0	0.03	0.08	0	0.01	0.03	0	0.01	0.03	0	0.01	0.02	0	0.04	0.13	0.01	0.18	0.48	0.01	0.15	0.42
chr3:122687200:122687428:-@chr3:122685603:122685627:-@chr3:122670559:122672167:-	n/a	n/a	n/a	n/a	n/a	n/a	n/a	n/a	n/a	n/a	0.02	0.36	0.87	0.02	0.38	0.95	0.05	0.49	0.89	0.24	0.65	0.95	n/a	n/a	n/a	0.03	0.28	0.79	0.09	0.42	0.83	0.02	0.19	0.44	0.02	0.12	0.31	0.03	0.13	0.25	0.09	0.37	0.77	0.03	0.36	0.91	0.19	0.6	0.97
chr2:3391975:3392361:-@chr2:3389774:3389919:-@chr2:3381539:3382198:-	ENSMUSG00000026646	Suv39h2	clone:F430008J24 product:suppressor of variegation 3-9 homolog 2 (Drosophila),6 days neonate spleen cDNA,suppressor of variegation 3-9 homologue 2, full insert sequence. (Fragment)., RIKEN full-length enriched library	n/a	n/a	n/a	n/a	n/a	n/a	n/a	0.16	0.58	0.97	n/a	n/a	n/a	n/a	n/a	n/a	0.21	0.59	0.96	n/a	n/a	n/a	n/a	n/a	n/a	0.1	0.49	0.97	0.13	0.48	0.92	0.06	0.45	1	0.04	0.33	0.82	0.11	0.54	0.95	0.18	0.66	0.96	0.06	0.44	0.84
chr19:8094045:8094253:+@chr19:8097817:8097926:+@chr19:8106122:8108577:+	n/a	n/a	n/a	n/a	n/a	n/a	n/a	n/a	n/a	n/a	n/a	n/a	n/a	n/a	n/a	n/a	n/a	n/a	n/a	n/a	n/a	n/a	n/a	n/a	n/a	n/a	n/a	n/a	n/a	n/a	n/a	n/a	n/a	n/a	n/a	n/a	n/a	n/a	n/a	n/a	n/a	n/a	n/a	n/a	n/a	n/a	n/a	n/a	n/a
chr3:88168950:88169724:+@chr3:88169804:88170208:+@chr3:88170827:88170923:+	ENSMUSG00000041423	Paqr6	progestin and adipoQ receptor family member VI	n/a	n/a	n/a	n/a	n/a	n/a	n/a	0.01	0.14	0.37	0.26	0.58	0.91	0.68	0.89	0.98	n/a	n/a	n/a	n/a	n/a	n/a	n/a	n/a	n/a	n/a	n/a	n/a	n/a	n/a	n/a	0.42	0.81	0.99	0.57	0.85	0.99	n/a	n/a	n/a	n/a	n/a	n/a	n/a	n/a	n/a
chr2:132675602:132675739:+@chr2:132680629:132680758:+@chr2:132686945:132687030:+	ENSMUSG00000027357	Crls1	clone:0610009I22 product:similar to DJ967N21.6 (NOVEL CDP-ALCOHOL PHOSPHATIDYLTRANSFERASE FAMILY MEMBER PROTEIN) (CAPTASE-ISO) (HYPOTHETICAL 32.6 KDA PROTEIN) [Homo sapiens],cardiolipin synthase 1 isoform 1, full insert sequence.,Mus musculus adult male kidney cDNA, RIKEN full-length enriched library	n/a	n/a	n/a	n/a	n/a	n/a	n/a	0.66	0.88	0.99	0.68	0.86	0.98	0.73	0.91	0.99	0.74	0.91	0.99	0.51	0.81	0.97	0.75	0.91	1	0.9	0.97	1	0.83	0.96	1	0.84	0.96	1	0.82	0.93	0.98	0.73	0.93	1	0.65	0.87	0.98	0.71	0.9	0.99
chr8:113533081:113533243:-@chr8:113532550:113532741:-@chr8:113500329:113500520:-@chr8:113497950:113499990:-	ENSMUSG00000033658	Ddx19b	DDX19 homolog	4	-1.0101	7.02592	0.35	0.37	0.03	0.713088	0.29	0.36	0.42	0.27	0.33	0.39	0.29	0.35	0.41	0.34	0.43	0.52	0.29	0.4	0.51	0.31	0.42	0.53	0.3	0.34	0.39	0.32	0.37	0.42	0.32	0.37	0.43	0.31	0.35	0.4	0.33	0.39	0.46	0.38	0.46	0.53	0.4	0.46	0.53
chr8:73123273:73123343:-@chr8:73123017:73123062:-@chr8:73122892:73122927:-	ENSMUSG00000070003	Ssbp4	Mus musculus adult male lung cDNA, clone:1210002E11 product:SINGLE STRANDED DNA BINDING PROTEIN-3 homolog [Homo sapiens], RIKEN full-length enriched library, full insert sequence.,single stranded DNA binding protein 4	n/a	n/a	n/a	n/a	n/a	n/a	n/a	0.78	0.95	1	0.67	0.89	0.99	0.82	0.94	0.99	0.71	0.92	1	0.54	0.82	0.98	0.69	0.91	0.99	0.84	0.95	0.99	0.74	0.89	0.99	0.41	0.75	0.98	0.52	0.8	1	0.79	0.92	0.99	0.48	0.8	0.99	0.4	0.77	0.98
chr5:31165577:31165778|31165733:+@chr5:31166947:31167101:+	ENSMUSG00000029166	Mapre3	APC-binding protein EB2	n/a	n/a	n/a	n/a	n/a	n/a	n/a	0.86	0.95	1	0.7	0.88	1	0.64	0.86	0.99	0.71	0.91	1	0.63	0.87	0.99	0.77	0.91	1	0.88	0.96	1	0.79	0.92	0.99	0.77	0.9	0.99	0.71	0.9	0.98	0.82	0.93	0.99	0.75	0.91	0.99	0.59	0.8	0.96
chr5:42094677:42094773:-@chr5:42089629:42089717:-@chr5:42078943:42079089:-	ENSMUSG00000029128	Rab28	RAB28, member RAS oncogene family	n/a	n/a	n/a	n/a	n/a	n/a	n/a	0.77	0.92	0.99	0.84	0.94	0.99	0.67	0.87	0.99	0.83	0.94	1	0.86	0.96	1	0.9	0.97	0.99	0.94	0.98	1	0.96	0.99	1	0.96	0.99	1	0.97	0.99	1	0.56	0.84	0.99	0.85	0.95	1	0.67	0.85	0.97
chr9:49351247:49351116|49351112:-@chr9:49331627:49331751:-	ENSMUSG00000039542	Ncam1	Mus musculus 10 days embryo whole body cDNA,Neural cell adhesion molecule (Fragment)., RIKEN full-length enriched library, clone:2610103A09 product:neural cell adhesion molecule 1, full insert sequence.,neural cell adhesion molecule 1 isoform 1	n/a	n/a	n/a	n/a	n/a	n/a	n/a	n/a	n/a	n/a	0.01	0.37	0.89	0.02	0.23	0.6	n/a	n/a	n/a	n/a	n/a	n/a	0.02	0.38	0.94	0.06	0.5	0.99	0.04	0.4	0.92	0.15	0.57	0.9	0.01	0.36	0.89	n/a	n/a	n/a	n/a	n/a	n/a	n/a	n/a	n/a
chr2:130101990:130102594:+@chr2:130102768:130102868:+@chr2:130103212:130103706:+	ENSMUSG00000027405	Nol5a	nucleolar protein 5A	n/a	n/a	n/a	n/a	n/a	n/a	n/a	0.85	0.96	1	0.83	0.94	0.99	0.86	0.95	1	0.82	0.94	1	0.84	0.95	0.99	0.83	0.95	1	0.74	0.89	0.98	0.76	0.95	1	0.41	0.69	0.97	0.61	0.85	0.99	0.85	0.95	0.99	0.61	0.86	0.99	0.77	0.92	0.98
chr19:28085462:28085657:-@chr19:27997698:27997756:-@chr19:27975269:27975393:-	ENSMUSG00000040929	Rfx3	regulatory factor X, 3 (influences HLA class II	n/a	n/a	n/a	n/a	n/a	n/a	n/a	0.03	0.35	0.87	0.02	0.47	0.89	0.06	0.45	0.92	0.03	0.42	0.92	0.01	0.22	0.67	0.04	0.36	0.88	0.07	0.36	0.77	0.06	0.26	0.65	0.01	0.15	0.52	0.01	0.19	0.79	0.04	0.41	0.89	0.03	0.38	0.95	0.02	0.24	0.68
chr7:91827820:91827907:-@chr7:91801392:91801552:-@chr7:91782749:91782919:-	ENSMUSG00000030629	Zfand6,Awp1	Mus musculus mRNA for AWP1 protein (Awp1 gene).,zinc finger, AN1-type domain 6	20	-0.686869	10.8392	0.04	0.14	0.1	1.90853	0.03	0.06	0.12	0.01	0.02	0.05	0.01	0.04	0.08	0.02	0.06	0.1	0.03	0.08	0.16	0.02	0.07	0.15	0.04	0.07	0.13	0.01	0.04	0.08	0.01	0.03	0.06	0.01	0.03	0.05	0	0.03	0.09	0	0.02	0.08	0.05	0.17	0.33
chr15:78433123:78433205:+@chr15:78435066:78435130:+@chr15:78436277:78436343:+	ENSMUSG00000018008	mFLJ00017,Pscd4	complete cds.,Pscd4 protein.,Pscd4 protein (Fragment).,Mus musculus cytohesin-4 mRNA,cytohesin 4	5	0.0909091	3.4934	0.69	0.8	0.12	1.40525	0.23	0.68	0.97	0.31	0.66	0.94	0.37	0.72	0.94	0.34	0.71	0.97	0.24	0.66	0.97	0.08	0.34	0.63	0.23	0.61	0.92	0.48	0.76	0.96	0.56	0.81	0.98	0.1	0.51	0.99	0.08	0.42	0.98	0.32	0.77	0.98	0.36	0.7	0.91
chr2:120978166:120978304:+@chr2:120980231:120980338:+@chr2:120980455:120980555:+	ENSMUSG00000027259	Adal	clone:C230071J24 product:hypothetical protein,Adult male testis cDNA, RIKEN full-length enriched library, clone:C530042F19 product:hypothetical Adenosine and AMP deaminase containing protein, full insert sequence (12 days embryo spinal cord cDNA,0 day neonate cerebellum cDNA, full insert sequence., clone:4930578F03 product:hypothetical Adenosine and AMP deaminase containing protein, full insert s…	-1	0.10101	0.915577	0.13	0.13	0	-1.20253	0.01	0.12	0.41	0.03	0.16	0.45	0.01	0.11	0.32	0	0.05	0.15	0.02	0.23	0.69	0.01	0.07	0.22	0	0.05	0.19	0.04	0.15	0.34	0.09	0.31	0.64	0.13	0.37	0.71	0	0.05	0.16	0.03	0.26	0.8	0.01	0.15	0.45
chr8:87561044:87561190:+@chr8:87562234|87562277:87562388:+	ENSMUSG00000031691	Tnpo2	karyopherin (importin) beta 2b	n/a	n/a	n/a	n/a	n/a	n/a	n/a	0.41	0.75	0.99	0.32	0.7	0.98	0.43	0.75	0.98	0.03	0.32	0.94	0.02	0.33	0.8	0.01	0.19	0.6	0.28	0.65	0.97	0.26	0.57	0.87	0.3	0.68	0.98	0.14	0.59	0.96	0.41	0.71	0.95	0.44	0.78	0.98	0.15	0.56	1
chr11:33743130:33743586:-@chr11:33551540:33551572:-@chr11:33543296:33545627:-	ENSMUSG00000053519	Kcnip1	Kv channel-interacting protein 1	n/a	n/a	n/a	n/a	n/a	n/a	n/a	0.07	0.43	0.94	0.1	0.56	0.94	0.07	0.45	0.89	n/a	n/a	n/a	0.1	0.49	0.93	0.12	0.51	0.92	0.06	0.41	0.89	0.09	0.49	0.94	0.05	0.33	0.79	0.11	0.56	0.93	0.02	0.22	0.68	0.06	0.44	0.86	0.1	0.52	0.93
chr8:26832134:26833072:+@chr8:26833503:26833585:+@chr8:26834552:26837780:+	n/a	n/a	n/a	-28	1.62626	11.0203	0.51	0.15	-0.36	-2.68834	0.27	0.52	0.86	0.18	0.48	0.71	0.22	0.52	0.79	0.23	0.5	0.85	0.24	0.57	0.88	0.26	0.53	0.84	0.16	0.39	0.65	0.3	0.57	0.94	0.06	0.24	0.59	0.1	0.31	0.66	0.36	0.62	0.85	0.13	0.5	0.92	0.37	0.65	0.88
chr8:73904890:73905859:-@chr8:73902382|73902426:73902288:-	ENSMUSG00000002393	Nr2f6	clone:2410017K09 product:nuclear receptor subfamily 2, RIKEN full-length enriched library, group F,nuclear receptor subfamily 2, full insert sequence.,Mus musculus ES cells cDNA, member 6	n/a	n/a	n/a	n/a	n/a	n/a	n/a	0	0.03	0.08	0.01	0.06	0.15	0	0.02	0.05	0.01	0.09	0.24	0.01	0.13	0.43	0.03	0.13	0.32	0	0.05	0.15	0	0.03	0.08	0	0.03	0.12	0	0.03	0.1	0.01	0.04	0.11	0.02	0.1	0.28	0	0.06	0.22
chr4:131838709:131838960:+@chr4:131840959:131841036:+@chr4:131845230:131845344:+	ENSMUSG00000028899	Taf12	TAF12 RNA polymerase II	n/a	n/a	n/a	n/a	n/a	n/a	n/a	0.74	0.92	0.99	0.83	0.95	1	0.8	0.93	1	0.92	0.97	1	0.65	0.88	1	0.77	0.93	0.99	0.81	0.94	1	0.78	0.93	0.99	0.8	0.94	1	0.81	0.93	1	0.76	0.92	0.99	0.87	0.96	1	0.87	0.96	1
chr1:51384632:51384765:-@chr1:51316229:51316274:-@chr1:51308111:51308331:-	n/a	n/a	n/a	n/a	n/a	n/a	n/a	n/a	n/a	n/a	n/a	n/a	n/a	n/a	n/a	n/a	n/a	n/a	n/a	n/a	n/a	n/a	n/a	n/a	n/a	n/a	n/a	n/a	n/a	n/a	n/a	n/a	n/a	n/a	n/a	n/a	n/a	0.07	0.5	0.96	n/a	n/a	n/a	0.07	0.41	0.76	n/a	n/a	n/a
chr5:150194683:150194777:+@chr5:150195207:150195302:+@chr5:150196084:150196171:+	n/a	n/a	n/a	n/a	n/a	n/a	n/a	n/a	n/a	n/a	0.17	0.49	0.82	0.16	0.51	0.94	n/a	n/a	n/a	n/a	n/a	n/a	0.6	0.88	0.99	0.01	0.08	0.23	0.23	0.57	0.95	n/a	n/a	n/a	0.01	0.06	0.17	0.03	0.15	0.38	n/a	n/a	n/a	n/a	n/a	n/a	n/a	n/a	n/a
chr5:76966723:76966882:+@chr5:76969772:76969792:+@chr5:76971076:76971263:+	ENSMUSG00000036435	Exoc1	CLONE NT2RP4002791 homolog [Homo sapiens], RIKEN full-length enriched library, clone:A730011E05 product:CDNA FLJ10893 FIS,Mus musculus 7 days neonate cerebellum cDNA, full insert sequence.,exocyst complex component 1	-7	0.434343	3.81428	0.45	0.27	-0.18	-1.94908	0.12	0.49	0.84	0.16	0.5	0.87	0.13	0.35	0.64	0.42	0.67	0.85	0.02	0.42	0.95	0.02	0.33	0.76	0.1	0.29	0.56	0.19	0.44	0.7	0.16	0.58	0.94	0.1	0.48	0.94	0.18	0.45	0.72	0.2	0.7	0.97	0.06	0.48	0.92
chr3:133039058:133039552:+@chr3:133040580:133040582:+@chr3:133040814:133041199:+	n/a	n/a	n/a	n/a	n/a	n/a	n/a	n/a	n/a	n/a	0.01	0.17	0.52	0.04	0.28	0.7	0.02	0.22	0.71	0.01	0.21	0.53	0.01	0.29	0.77	0.01	0.16	0.53	0.01	0.23	0.59	0.02	0.18	0.55	0.04	0.53	0.95	0.02	0.5	0.98	0.01	0.54	0.97	0.01	0.21	0.69	0.03	0.49	0.98
chr10:7493902:7493747|7493746:-@chr10:7493096:7493229:-	ENSMUSG00000040006	BC013529	clone:G630077E05 product:hypothetical protein,Mus musculus adult male intestinal mucosa cDNA, full insert sequence.,hypothetical protein LOC215751, RIKEN full-length enriched library	n/a	n/a	n/a	n/a	n/a	n/a	n/a	0.82	0.94	1	0.87	0.96	1	0.74	0.91	0.98	0.74	0.91	0.99	0.65	0.88	0.98	0.92	0.97	1	0.95	0.99	1	0.7	0.91	1	0.88	0.97	1	0.93	0.98	1	0.65	0.9	1	0.85	0.95	0.99	0.84	0.94	1
chr9:110017540:110018086:-@chr9:110015529|110015594:110015475:-	ENSMUSG00000032480	n/a	n/a	-5	1.40404	10.9525	0.77	0.68	-0.09	-0.584709	0.53	0.77	0.95	0.59	0.84	0.97	0.35	0.7	0.94	0.14	0.53	0.92	0.32	0.67	0.98	0.47	0.73	0.91	0.27	0.5	0.71	0.34	0.57	0.8	0.67	0.85	0.99	0.45	0.64	0.83	0.24	0.44	0.64	0.12	0.35	0.72	0.17	0.62	0.95
chr4:111420360:111420408:+@chr4:111440268:111440309:+@chr4:111441321:111441445:+	ENSMUSG00000034401	Spata6	spermatogenesis associated 6	n/a	n/a	n/a	n/a	n/a	n/a	n/a	0.39	0.76	1	0.36	0.75	0.99	n/a	n/a	n/a	0.79	0.92	0.99	0.46	0.8	0.98	0.14	0.56	0.87	0.39	0.72	0.97	0.39	0.68	0.93	0.33	0.75	0.97	0.18	0.58	0.95	n/a	n/a	n/a	0.28	0.64	0.97	0.25	0.67	0.97
chr2:131059797:131059863:+@chr2:131064472:131064646:+@chr2:131066051:131066228:+	ENSMUSG00000037523	D430028G21Rik	clone:A630072D19 product:hypothetical protein,virus-induced signaling adapter, full insert sequence.,3 days neonate thymus cDNA, RIKEN full-length enriched library	n/a	n/a	n/a	n/a	n/a	n/a	n/a	0.74	0.9	0.99	0.79	0.93	1	0.84	0.96	0.99	0.69	0.89	0.98	0.8	0.94	1	0.8	0.93	1	0.84	0.95	1	0.93	0.97	1	0.81	0.93	0.99	0.95	0.99	1	0.87	0.95	1	0.85	0.95	1	0.72	0.91	1
chr13:104623578:104625108:-@chr13:104617987:104618103:-@chr13:104614800:104614928:-	ENSMUSG00000021709	Erbb2ip	Erbb2 interacting protein isoform 2	-6	-0.434343	3.71772	0.9	0.92	0.02	-1.49706	0.66	0.85	0.98	0.74	0.92	1	0.76	0.92	1	0.83	0.95	1	0.76	0.9	0.99	0.71	0.87	0.98	0.73	0.9	0.98	0.91	0.97	1	0.79	0.93	0.99	0.87	0.96	1	0.8	0.92	0.99	0.31	0.53	0.87	0.49	0.71	1
chr2:19299789:19299889:+@chr2:19304868:19304944:+@chr2:19314835:19314982:+	ENSMUSG00000023094	Msrb2	methionine sulfoxide reductase B2	n/a	n/a	n/a	n/a	n/a	n/a	n/a	0.8	0.92	0.99	0.9	0.97	1	0.83	0.95	1	0.93	0.97	1	0.9	0.97	1	0.94	0.98	1	0.95	0.98	1	0.95	0.98	1	0.98	0.99	1	0.97	0.99	1	0.75	0.9	0.99	0.83	0.95	1	0.86	0.96	1
chr11:51433280:51433653:+@chr11:51435987:51436092:+@chr11:51436594:51437647:+	ENSMUSG00000001056	Nola2	nucleolar protein family A	n/a	n/a	n/a	n/a	n/a	n/a	n/a	0.89	0.96	1	0.85	0.96	1	0.85	0.95	0.99	0.91	0.97	1	0.83	0.95	1	0.8	0.94	1	0.93	0.98	1	0.94	0.98	1	0.92	0.98	1	0.95	0.98	1	0.93	0.97	1	0.88	0.96	1	0.81	0.94	1
chr16:32165466:32166119:-@chr16:32163339:32163483:-@chr16:32147639:32147759:-	ENSMUSG00000052384	Lrrc33	leucine rich repeat containing 33	n/a	n/a	n/a	n/a	n/a	n/a	n/a	0.12	0.63	0.94	0.13	0.56	0.9	0.07	0.61	0.99	0.04	0.16	0.37	0.04	0.4	0.9	0.04	0.34	0.82	0.02	0.25	0.85	0.11	0.55	0.95	0.26	0.62	0.95	0.12	0.5	0.92	0.12	0.54	0.94	n/a	n/a	n/a	0.09	0.49	1
chr5:130292831:130293130:-@chr5:130292467:130292532:-@chr5:130282742:130285320:-	n/a	n/a	n/a	n/a	n/a	n/a	n/a	n/a	n/a	n/a	0.01	0.19	0.69	0.07	0.29	0.63	0.01	0.12	0.37	0.06	0.34	0.77	0.03	0.5	0.92	0.08	0.36	0.8	0	0.2	0.51	0.01	0.21	0.6	0.01	0.34	0.88	0.04	0.35	0.86	0	0.13	0.42	0.02	0.28	0.73	0.03	0.33	0.8
chr9:114352127:114352330|114352239:+@chr9:114359715:114359789:+	ENSMUSG00000045594	Glb1	Mus musculus adult male diencephalon cDNA,Glb1 protein (Fragment)., clone:9330151I20 product:galactosidase, RIKEN full-length enriched library,galactosidase, beta 1, full insert sequence.	n/a	n/a	n/a	n/a	n/a	n/a	n/a	0	0.04	0.16	0	0.06	0.15	0.02	0.17	0.46	0.06	0.17	0.33	n/a	n/a	n/a	0.02	0.07	0.16	0	0.04	0.15	0.02	0.07	0.16	0.04	0.17	0.38	0.02	0.24	0.66	0.04	0.26	0.73	0.01	0.14	0.46	n/a	n/a	n/a
chr5:122026577:122026466|122026464:-@chr5:122025905:122026033:-	ENSMUSG00000029455	Aldh2	aldehyde dehydrogenase 2, mitochondrial	n/a	n/a	n/a	n/a	n/a	n/a	n/a	0	0.01	0.03	0	0.01	0.03	0	0.01	0.02	0	0	0.02	0	0.02	0.07	0	0.01	0.04	0	0.01	0.02	0	0	0.01	0	0.01	0.02	0	0	0.01	0	0.01	0.04	0	0.02	0.06	0	0.02	0.07
chr2:93955150:93955225:-@chr2:93923324:93923431:-@chr2:93906566:93906630:-	ENSMUSG00000027195	Hsd17b12	10, 11 days embryo whole body cDNA, RIKEN full-length enriched library, clone:2810004A21 product:hydroxysteroid (17-beta) dehydrogenase 12, full insert sequence.,hydroxysteroid (17-beta) dehydrogenase 12	n/a	n/a	n/a	n/a	n/a	n/a	n/a	0.53	0.78	0.96	0.26	0.65	0.92	0.44	0.77	0.99	0.53	0.82	0.98	0.51	0.81	0.95	0.63	0.84	0.99	0.76	0.9	0.98	0.63	0.84	0.99	0.66	0.87	1	0.83	0.94	1	0.48	0.8	1	0.51	0.84	0.99	0.5	0.81	0.97
chr13:108881728:108881817:-@chr13:108871547:108871587:-@chr13:108842782:108843148:-	ENSMUSG00000068184	Ndufa12l	Mimitin, mitochondrial precursor (Myc-induced mitochondrial protein) (MMTN) (NDUFA12-like protein).	-6	0.414141	6.35643	0.73	0.79	0.06	-1.00908	0.41	0.7	0.92	0.49	0.8	0.97	0.43	0.69	0.89	0.88	0.97	1	0.58	0.83	0.99	0.79	0.89	0.96	0.79	0.92	0.99	0.91	0.98	1	0.88	0.95	1	0.88	0.95	1	0.66	0.87	0.99	0.49	0.78	0.98	0.53	0.8	0.97
chr5:69980900:69981062:-@chr5:69980577:69980701:-@chr5:69977704:69977805:-	ENSMUSG00000029209	Gnpda2	glucosamine-6-phosphate deaminase 2	n/a	n/a	n/a	n/a	n/a	n/a	n/a	0.01	0.2	0.75	0.03	0.14	0.44	0.02	0.22	0.7	0.04	0.19	0.48	n/a	n/a	n/a	0	0.07	0.22	0	0.12	0.55	0	0.11	0.34	0.02	0.12	0.35	0	0.04	0.15	0.02	0.25	0.65	0.01	0.15	0.46	n/a	n/a	n/a
chr12:115272319:115272024|115272010:-@chr12:114667679:114667730:-	n/a	n/a	n/a	n/a	n/a	n/a	n/a	n/a	n/a	n/a	n/a	n/a	n/a	n/a	n/a	n/a	0.06	0.5	0.92	n/a	n/a	n/a	n/a	n/a	n/a	n/a	n/a	n/a	n/a	n/a	n/a	n/a	n/a	n/a	n/a	n/a	n/a	0.02	0.53	0.96	n/a	n/a	n/a	n/a	n/a	n/a	n/a	n/a	n/a
chr5:124562798:124563537:+@chr5:124564074|124564488:124564654:+	n/a	n/a	n/a	n/a	n/a	n/a	n/a	n/a	n/a	n/a	0.79	0.93	1	0.77	0.93	0.99	0.79	0.93	0.99	0.68	0.87	0.98	0.84	0.94	0.99	0.6	0.81	0.96	0.85	0.95	0.99	0.73	0.91	0.99	0.78	0.93	1	0.67	0.87	0.98	0.86	0.95	0.99	0.72	0.92	1	0.75	0.9	0.98
chr8:73904890:73905859:-@chr8:73902382|73902455:73902288:-	ENSMUSG00000002393	Nr2f6	clone:2410017K09 product:nuclear receptor subfamily 2, RIKEN full-length enriched library, group F,nuclear receptor subfamily 2, full insert sequence.,Mus musculus ES cells cDNA, member 6	n/a	n/a	n/a	n/a	n/a	n/a	n/a	0	0.04	0.11	0.03	0.07	0.14	0	0.02	0.06	0	0.06	0.22	0.02	0.14	0.45	0.03	0.11	0.26	0.02	0.05	0.12	0	0.03	0.1	0	0.02	0.07	0.01	0.04	0.08	0.01	0.05	0.12	0.03	0.14	0.3	0.01	0.06	0.19
chr4:62984953:62985015:+@chr4:62985428|62985465:62985518:+	ENSMUSG00000045672	Col27a1,mKIAA1870	alpha 1, RIKEN full-length enriched library, full insert sequence.,Mus musculus 8 days embryo whole body cDNA,procollagen, type XXVII, clone:5730512J02 product:procollagen	n/a	n/a	n/a	n/a	n/a	n/a	n/a	n/a	n/a	n/a	n/a	n/a	n/a	n/a	n/a	n/a	n/a	n/a	n/a	n/a	n/a	n/a	n/a	n/a	n/a	n/a	n/a	n/a	n/a	n/a	n/a	n/a	n/a	n/a	n/a	n/a	n/a	n/a	n/a	n/a	n/a	n/a	n/a	n/a	n/a	n/a
chr7:20179822:20179901:-@chr7:20177342:20177426:-	n/a	n/a	n/a	-48	-0.585859	19.8428	0.46	0.17	-0.29	-2.38949	0.27	0.39	0.54	0.39	0.57	0.8	0.29	0.43	0.63	0.26	0.43	0.7	0.22	0.37	0.58	0.2	0.27	0.37	0.22	0.33	0.47	0.35	0.52	0.72	0.59	0.79	0.94	0.64	0.82	0.95	0.28	0.43	0.61	0.24	0.34	0.47	0.24	0.38	0.55
chr11:70758705:70758863:-@chr11:70758472|70758487:70758347:-	ENSMUSG00000040667	Nup88	nucleoporin 88 isoform 1,Mus musculus mRNA for 88kDa nucleoporin protein (Nup88 gene).	11	-0.757576	7.53455	0.25	0.36	0.1	1.56049	0.13	0.24	0.39	0.13	0.27	0.44	0.11	0.25	0.43	0.03	0.11	0.22	0	0.03	0.12	0.06	0.16	0.29	0.19	0.33	0.5	0.03	0.14	0.31	0.09	0.23	0.45	0.11	0.29	0.49	0.08	0.16	0.27	0.03	0.19	0.45	0.11	0.29	0.51
chr15:103073075:103073149:+@chr15:103074056:103074211:+@chr15:103074390:103076225:+	ENSMUSG00000046434	Hnrnpa1	heterogeneous nuclear ribonucleoprotein A1	-17	1.63636	10.0789	1	0.98	-0.02	-1.84904	0.98	0.99	1	0.99	1	1	0.99	1	1	0.97	0.98	0.99	0.98	0.99	1	0.98	0.99	1	1	1	1	0.99	0.99	0.99	0.98	0.99	0.99	0.99	0.99	1	0.99	1	1	0.99	1	1	0.99	1	1
chr14:54862543:54862422|54862376:-@chr14:54855154:54855388:-	n/a	n/a	n/a	-29	-0.0505051	15.9401	0.75	0.39	-0.36	-1.81614	0.47	0.67	0.87	0.57	0.78	0.95	0.62	0.8	0.94	0.24	0.36	0.49	0.32	0.51	0.72	0.28	0.41	0.58	0.56	0.75	0.96	0.31	0.45	0.63	0.38	0.6	0.87	0.18	0.32	0.5	0.58	0.76	0.95	0.72	0.9	1	0.44	0.66	0.91
chr14:121993558:121993605:-@chr14:121991616:121991649:-@chr14:121991034:121991170:-	ENSMUSG00000025558	Dock9,mKIAA1058	clone:B230309H04 product:TRG PROTEIN (FRAGMENT) homolog [Rattus norvegicus], RIKEN full-length enriched library, full insert sequence.,Mus musculus adult male corpora quadrigemina cDNA,Adult male medulla oblongata cDNA, clone:6330522O04 product:Dedicator of cytokinesis protein 9 (Cdc42 guanine nucleotide exchange factor zizimin 1) homolog (Fragment).	-2	-0.242424	2.12294	0.47	0.32	-0.15	-0.827896	0.07	0.42	0.87	0.02	0.52	0.93	0.07	0.47	0.96	0.04	0.53	0.94	0.03	0.46	0.89	0.05	0.34	0.83	0.11	0.46	0.86	0	0.29	0.75	0.07	0.44	0.93	0.22	0.59	0.91	0.02	0.26	0.72	0	0.4	0.9	0.01	0.26	0.75
chr8:93824677:93824779:-@chr8:93823662:93823738:-@chr8:93823128:93823271:-	n/a	na/a	n/a	n/a	n/a	n/a	n/a	n/a	n/a	n/a	n/a	n/a	n/a	n/a	n/a	n/a	n/a	n/a	n/a	n/a	n/a	n/a	n/a	n/a	n/a	n/a	n/a	n/a	n/a	n/a	n/a	n/a	n/a	n/a	n/a	n/a	n/a	n/a	n/a	n/a	n/a	n/a	n/a	n/a	n/a	n/a	n/a	n/a	n/a
chr1:88656863:88656964:+@chr1:88687991:88688032:+@chr1:88709087:88709164:+	ENSMUSG00000053333	Dis3l2	DIS3 mitotic control homolog (S.	4	-0.838384	4.35938	0.61	0.6	-0.01	1.10988	0.33	0.8	0.98	0.18	0.59	0.91	0.11	0.44	0.75	0.25	0.7	0.95	0.03	0.57	0.97	0.22	0.7	0.97	0.18	0.52	0.92	0.07	0.39	0.87	0.04	0.24	0.71	0.05	0.19	0.48	0.22	0.71	0.99	0.12	0.48	0.92	0.03	0.38	0.89
chr19:10591876:10591810|10591659:-@chr19:10587355:10591579:-	ENSMUSG00000024668	0610038F07Rik	RIKEN full-length enriched library,hypothetical protein LOC66072, 11 days embryo whole body cDNA,Mus musculus 10,0610038F07Rik protein., full insert sequence., clone:2810489L10 product:weakly similar to RE29446P [Drosophila melanogaster]	n/a	n/a	n/a	n/a	n/a	n/a	n/a	0.95	0.98	1	0.96	0.99	1	0.96	0.99	1	0.95	0.99	1	0.95	0.98	1	0.95	0.98	1	0.96	0.99	1	0.97	0.99	1	0.95	0.98	1	0.98	0.99	1	0.91	0.97	1	0.93	0.97	0.99	0.94	0.98	1
chr2:5777026:5777093:+@chr2:5782073:5782122:+@chr2:5783347:5783454:+	ENSMUSG00000025817	Nudt5	nudix (nucleoside diphosphate linked moiety	n/a	n/a	n/a	n/a	n/a	n/a	n/a	0.49	0.82	0.99	0.69	0.88	1	0.6	0.85	0.99	0.47	0.78	1	0.18	0.56	0.97	0.73	0.91	0.99	0.74	0.92	0.99	0.79	0.92	0.99	0.56	0.85	0.99	0.7	0.91	0.99	0.63	0.87	0.98	0.38	0.79	0.97	0.59	0.82	0.97
chr5:121917863:121917994:+@chr5:121932342:121932446:+@chr5:121937759:121937808:+	ENSMUSG00000029452	Tmem116	hypothetical protein LOC77462, clone:4930406A18 product:hypothetical protein, full insert sequence.,Mus musculus adult male testis cDNA, RIKEN full-length enriched library	n/a	n/a	n/a	n/a	n/a	n/a	n/a	0.61	0.87	0.99	0.47	0.75	0.95	0.71	0.89	0.99	0.71	0.89	0.99	0.26	0.59	0.93	0.63	0.9	0.99	0.86	0.95	1	0.8	0.93	1	0.76	0.9	0.99	0.73	0.87	0.97	0.57	0.83	0.99	0.59	0.83	0.99	0.76	0.93	1
chr2:144198927:144199591|144199105:+@chr2:144201581:144201699:+	ENSMUSG00000027425	Csrp2bp	clone:2510008M08 product:inferred: RIKEN cDNA 2510008M08 gene / CRP2 binding protein {Homo sapiens}, RIKEN full-length enriched library, full insert sequence.,cysteine and glycine-rich protein 2 binding,Mus musculus 13 days embryo liver cDNA	1	-0.030303	0.881396	0.84	0.92	0.08	1.16894	0.68	0.83	0.95	0.79	0.9	0.98	0.6	0.8	0.95	0.68	0.8	0.9	0.85	0.95	0.99	0.69	0.86	0.98	0.73	0.85	0.96	0.82	0.93	0.99	0.81	0.89	0.97	0.79	0.89	0.96	0.77	0.91	0.99	0.85	0.94	0.99	0.75	0.91	0.99
chr18:6052860:6057702:-@chr18:6050164:6050166:-@chr18:6049275:6049356:-	ENSMUSG00000041225	Arhgap12	Rho GTPase activating protein 12 isoform 2	n/a	n/a	n/a	n/a	n/a	n/a	n/a	0.01	0.09	0.25	0.03	0.34	0.75	0	0.13	0.48	0	0.03	0.09	0.06	0.37	0.78	0.01	0.2	0.49	0.01	0.07	0.24	0	0.06	0.2	0.02	0.17	0.42	0.01	0.1	0.31	0.02	0.14	0.41	0.03	0.18	0.52	0.02	0.2	0.56
chr1:145649265:145649363:+@chr1:145650058:145650207:+@chr1:145653814:145654596:+	ENSMUSG00000018189	Uchl5	ubiquitin carboxyl-terminal esterase L5	n/a	n/a	n/a	n/a	n/a	n/a	n/a	0.07	0.25	0.57	0.01	0.12	0.41	n/a	n/a	n/a	0.01	0.05	0.15	0.06	0.35	0.7	0.05	0.15	0.28	0.1	0.2	0.34	0.07	0.21	0.46	0.07	0.18	0.33	0.1	0.24	0.42	0.01	0.12	0.42	0.01	0.07	0.18	0.01	0.22	0.57
chr15:4325491:4325815:+@chr15:4387212:4387302:+@chr15:4466619:4470484:+	ENSMUSG00000049148	Plcxd3	phosphatidylinositol-specific phospholipase C	n/a	n/a	n/a	n/a	n/a	n/a	n/a	0.05	0.46	0.89	0.02	0.54	0.96	0.04	0.34	0.82	0.09	0.64	0.97	n/a	n/a	n/a	0.08	0.4	0.95	0.13	0.57	0.95	0.01	0.52	0.91	0.01	0.39	0.87	0.11	0.56	0.98	n/a	n/a	n/a	0.17	0.51	0.79	0.06	0.63	0.98
chr11:117634832:117634689|117634677:-@chr11:117634261:117634412:-	ENSMUSG00000025572	Tmc6	adult female mammary gland cDNA,transmembrane channel-like gene family 6 isoform, clone:D730027I09 product:hypothetical protein, RIKEN full-length enriched library, full insert sequence.,Mus musculus 8 days embryo whole body cDNA,Mus musculus 10 days lactation, clone:5730515G05 product:similar to LAK-4P [Homo sapiens],Transmembrane channel-like protein 6.	n/a	n/a	n/a	n/a	n/a	n/a	n/a	0.43	0.77	0.98	0.42	0.79	0.98	0.44	0.8	0.98	0.23	0.62	0.96	n/a	n/a	n/a	0.6	0.88	1	0.18	0.47	0.79	0.49	0.76	0.97	0.15	0.67	0.99	0.1	0.51	0.92	0.25	0.64	0.95	0.3	0.77	0.99	n/a	n/a	n/a
chr18:36799919:36800014:+@chr18:36801053:36801159:+@chr18:36801231:36801347:+	ENSMUSG00000024483	Ankhd1	Mus musculus adult male testis cDNA, clone:4933432B13 product:weakly similar to GENE TRAP ANKYRIN REPEAT CONTAINING PROTEIN [Mus musculus], RIKEN full-length enriched library, full insert sequence., clone:A730021C13 product:hypothetical Yeast DNA-binding domain/Ankyrin repeat region circular profile containing protein,7 days neonate cerebellum cDNA, full insert sequence. (Fragment).	n/a	n/a	n/a	n/a	n/a	n/a	n/a	0	0.07	0.24	0.01	0.11	0.36	n/a	n/a	n/a	0.02	0.27	0.86	n/a	n/a	n/a	0.01	0.1	0.57	0.02	0.06	0.12	0	0.05	0.14	0	0.04	0.14	0.01	0.03	0.1	0	0.08	0.24	0	0.06	0.19	0.02	0.09	0.27
chr5:31754804:31754950:+@chr5:31755528:31755586:+@chr5:31767819:31768399:+	ENSMUSG00000062761	Zfp512	zinc finger protein 512	-4	0.222222	3.11904	0.77	0.74	-0.03	-1.35369	0.39	0.76	0.98	0.43	0.77	0.98	0.41	0.77	0.97	0.68	0.89	1	0.16	0.52	0.97	0.41	0.76	0.98	0.81	0.95	1	0.64	0.87	0.99	0.83	0.95	1	0.88	0.96	0.99	0.52	0.83	0.97	0.13	0.45	0.85	0.15	0.47	0.91
chr17:36326122:36326430:-@chr17:36324471|36324544:36324196:-	ENSMUSG00000054128	H2-T3,H2-T3-like,H2-Tw3	T region locus 3, RIKEN full-length enriched library,histocompatibility 2, full insert sequence.,hypothetical protein LOC547339, clone:9130023H02 product:histocompatibility 2,Mus musculus adult male cecum cDNA	n/a	n/a	n/a	n/a	n/a	n/a	n/a	0	0.08	0.32	0	0.06	0.23	0	0.1	0.33	0	0.08	0.25	0	0.1	0.36	0.01	0.13	0.41	0	0.16	0.71	0	0.01	0.06	0	0.01	0.03	0	0.01	0.03	0	0.03	0.11	0.01	0.09	0.27	0.01	0.08	0.25
chrX:20235433:20235652:+@chrX:20236326:20236422:+@chrX:20245575:20245714:+	n/a	n/a	n/a	1	0.111111	0.908866	0.05	0.08	0.03	0.978019	0.01	0.05	0.13	0	0.02	0.05	0.01	0.07	0.16	0.03	0.1	0.21	0.01	0.08	0.23	0.01	0.06	0.15	0	0.03	0.09	0.03	0.06	0.12	0.02	0.08	0.18	0.01	0.05	0.1	0.05	0.12	0.24	0.02	0.09	0.23	0	0.05	0.17
chr10:127796226:127796355:+@chr10:127796490|127796550:127796591:+	ENSMUSG00000005683	n/a	citrate synthase	n/a	n/a	n/a	n/a	n/a	n/a	n/a	0.99	1	1	0.99	1	1	0.99	1	1	0.99	1	1	0.99	1	1	0.99	1	1	1	1	1	1	1	1	0.99	1	1	0.93	0.98	1	0.99	1	1	0.99	0.99	1	0.99	1	1
chr18:6057515:6057589:-@chr18:6056977:6056991:-@chr18:6052860:6052921:-	ENSMUSG00000041225	Arhgap12	Rho GTPase activating protein 12 isoform 1	-2	-0.474747	2.9106	0.53	0.31	-0.22	-0.524034	0.08	0.5	0.89	0.01	0.38	0.86	0.33	0.71	0.97	0.13	0.51	0.91	0.02	0.32	0.78	0	0.14	0.52	0.17	0.43	0.75	0.35	0.66	0.9	0.1	0.32	0.6	0.03	0.17	0.44	0.13	0.52	0.9	0.01	0.28	0.64	0.01	0.33	0.77
chr11:117711068:117711177:+@chr11:117713977|117716539:117717057:+	ENSMUSG00000017716	Birc5	baculoviral IAP repeat-containing 5 isoform 1,baculoviral IAP repeat-containing 5 isoform 3	-32	-2.89899	16.1461	0.87	0.53	-0.35	-1.80235	0.77	0.92	1	0.67	0.88	0.99	0.58	0.82	0.99	0.74	0.92	0.99	0.48	0.8	0.98	0.75	0.92	0.99	0.73	0.92	0.99	0.76	0.91	1	0.75	0.91	1	0.83	0.95	0.99	0.61	0.85	1	0.79	0.94	0.99	0.57	0.78	0.94
chr15:90795898:90796653:-@chr15:90795406:90795426:-@chr15:90790119:90790179:-	ENSMUSG00000022629	Kif21a	kinesin family member 21A, complete cds.,Mus musculus Kif21a (Kif21a) mRNA	-18	0.181818	7.88217	0.94	0.61	-0.33	-2.3067	0.77	0.94	1	0.78	0.94	1	0.79	0.94	0.99	0.65	0.89	1	0.45	0.75	0.96	0.52	0.76	0.92	0.38	0.6	0.84	0.8	0.92	0.98	0.13	0.44	0.91	0.44	0.74	0.94	0.43	0.61	0.76	0.58	0.83	0.96	0.32	0.63	0.87
chr4:108000742:108000895:+@chr4:108001793:108001823:+@chr4:108004816:108004956:+	ENSMUSG00000048351	2010305A19Rik	clone:2010305A19 product:RIKEN cDNA 2010305A19 gene, full insert sequence.,Mus musculus adult male small intestine cDNA, RIKEN full-length enriched library,hypothetical protein LOC69893	n/a	n/a	n/a	n/a	n/a	n/a	n/a	0.02	0.08	0.21	0.02	0.11	0.33	0	0.11	0.41	0	0.06	0.2	0.01	0.22	0.58	0.01	0.11	0.35	0	0.02	0.08	0	0.04	0.14	0	0.03	0.12	0	0.03	0.08	0	0.09	0.26	0.01	0.16	0.55	0.08	0.37	0.74
chr11:26368672:26368717:+@chr11:26368801|26368816:26368882:+	ENSMUSG00000004018	Pog,Fancl	Mus musculus proliferation of germ cells protein (Pog) mRNA, complete cds.,Fanconi anemia, complementation group L	n/a	n/a	n/a	n/a	n/a	n/a	n/a	n/a	n/a	n/a	n/a	n/a	n/a	n/a	n/a	n/a	0.41	0.81	0.98	n/a	n/a	n/a	0.5	0.81	0.99	0.38	0.82	0.99	0.58	0.85	0.99	n/a	n/a	n/a	0.43	0.79	0.99	n/a	n/a	n/a	n/a	n/a	n/a	n/a	n/a	n/a
chr5:123549846:123549962:+@chr5:123551620|123551634:123551693:+	ENSMUSG00000054434	Tmem120b	hypothetical protein LOC330189	n/a	n/a	n/a	n/a	n/a	n/a	n/a	0.05	0.3	0.69	0.02	0.4	0.84	0.03	0.37	0.84	0.02	0.2	0.51	0.04	0.35	0.86	0.02	0.12	0.34	0.02	0.16	0.43	0.04	0.3	0.69	0.04	0.4	0.89	0.01	0.23	0.67	0.04	0.34	0.95	0.02	0.43	0.95	0.04	0.29	0.77
chr8:87829108:87829224|87829220:+@chr8:87830116:87830217:+	ENSMUSG00000031697	Orc6,Orc6l	complete cds.,2 cells egg cDNA,Mus musculus origin recognition complex subunit 6 (Orc6) mRNA,origin recognition complex subunit 6-like, RIKEN full-length enriched library, full insert sequence., subunit 6-like (S. cerevisiae), clone:B020006L24 product:origin recognition complex	n/a	n/a	n/a	n/a	n/a	n/a	n/a	0.02	0.42	0.85	n/a	n/a	n/a	n/a	n/a	n/a	0.06	0.51	0.97	n/a	n/a	n/a	0.02	0.19	0.63	0.09	0.36	0.7	0.05	0.25	0.65	0.05	0.34	0.73	0.01	0.17	0.5	0.02	0.28	0.74	0.03	0.53	0.99	0.01	0.17	0.53
chr7:52316111:52316262:-@chr7:52315729|52315785:52315575:-	ENSMUSG00000007837	Prrg2	proline-rich Gla (G-carboxyglutamic acid)	-9	0.575758	5.15241	0.66	0.46	-0.2	-1.8585	0.25	0.63	0.95	0.27	0.59	0.95	0.38	0.76	0.99	0.17	0.48	0.93	0.21	0.57	0.92	0.43	0.73	0.99	0.24	0.64	0.96	0.23	0.6	0.91	0.03	0.37	0.85	0.12	0.4	0.95	0.58	0.8	0.96	0.52	0.79	0.99	0.43	0.71	0.92
chr19:8738279:8738947:+@chr19:8739399:8739490:+@chr19:8752352:8758092:+	n/a	n/a	n/a	n/a	n/a	n/a	n/a	n/a	n/a	n/a	0.05	0.37	0.84	n/a	n/a	n/a	n/a	n/a	n/a	0.09	0.48	0.93	n/a	n/a	n/a	n/a	n/a	n/a	0.08	0.55	0.93	0.01	0.42	0.91	0.01	0.32	0.8	0.16	0.59	0.92	0.03	0.49	0.96	0.01	0.35	0.92	0.11	0.54	0.92
chrX:130811385:130811533:-@chrX:130801870:130802100:-@chrX:130800800:130800854:-	ENSMUSG00000067369	4732479N06Rik	10 days neonate cerebellum cDNA, clone:B930004C15 product:hypothetical protein, RIKEN full-length enriched library	n/a	n/a	n/a	n/a	n/a	n/a	n/a	0.86	0.94	0.99	0.88	0.96	0.99	0.81	0.92	0.98	0.87	0.95	1	0.86	0.96	1	0.91	0.97	1	0.92	0.97	0.99	0.88	0.97	1	0.84	0.95	1	0.82	0.94	0.99	0.86	0.96	1	0.77	0.92	0.98	0.8	0.94	0.99
chr18:69812048:69812126:+@chr18:69814615|69814618:69814691:+	ENSMUSG00000053477	Tcf4	clone:4732452G07 product:transcription factor 4, full insert sequence.,Mus musculus 10 days neonate skin cDNA,transcription factor 4 isoform b, RIKEN full-length enriched library	-2	-0.323232	6.89727	0.9	0.89	-0.01	-0.243106	0.81	0.94	0.99	0.68	0.89	1	0.65	0.87	0.99	0.45	0.75	0.95	0.44	0.78	0.97	0.82	0.94	1	0.81	0.94	0.99	0.61	0.87	0.98	0.76	0.92	0.99	0.78	0.93	1	0.73	0.91	0.99	0.55	0.82	0.97	0.64	0.9	0.99
chr11:78784819:78784929:-@chr11:78783216:78783308:-@chr11:78781500:78781535:-	ENSMUSG00000001123	Lgals9	galactose binding,lectin	-2	-0.252525	1.59762	0.08	0.03	-0.05	-1.0938	0.04	0.11	0.22	0.01	0.05	0.15	0.03	0.08	0.18	0	0.04	0.17	0.01	0.07	0.17	0.04	0.12	0.25	0	0.03	0.08	0.01	0.05	0.14	0.04	0.09	0.19	0.01	0.05	0.12	0.04	0.1	0.18	0.01	0.05	0.13	0.03	0.14	0.33
chr2:103601206:103601428:-@chr2:103597828:103597950:-@chr2:103597256:103597417:-	ENSMUSG00000027185	Nat10	N-acetyltransferase 10,Mus musculus 16 days neonate cerebellum cDNA, full insert sequence., clone:9630054E14 product:hypothetical Acyl-CoA N-acyltransferases (Nat) structure containing protein, RIKEN full-length enriched library	n/a	n/a	n/a	n/a	n/a	n/a	n/a	0.67	0.9	0.99	0.71	0.88	0.98	0.48	0.77	0.97	0.62	0.87	0.99	0.58	0.85	0.99	0.35	0.62	0.86	0.75	0.92	0.99	0.8	0.94	0.99	0.72	0.91	0.99	0.84	0.94	1	0.62	0.84	0.99	0.61	0.86	0.98	0.61	0.85	0.99
chr1:67067432:67067639:-@chr1:67056485:67056620:-@chr1:67055802:67055948:-	ENSMUSG00000026000	Lancl1	LanC (bacterial lantibiotic synthetase component	n/a	n/a	n/a	n/a	n/a	n/a	n/a	0.79	0.94	1	0.71	0.91	0.99	0.81	0.95	1	0.86	0.94	0.99	0.64	0.86	0.99	0.87	0.96	1	0.82	0.93	0.99	0.86	0.96	1	0.92	0.97	1	0.91	0.97	1	0.66	0.85	0.97	0.5	0.74	0.96	0.61	0.87	1
chr3:58934416:58934546:-@chr3:58919983|58920213:58918547:-	ENSMUSG00000036381	P2ry14	P2Y14 receptor	n/a	n/a	n/a	n/a	n/a	n/a	n/a	0.18	0.45	0.78	0.11	0.38	0.78	0.35	0.8	1	0.08	0.35	0.72	0.11	0.42	0.89	0.28	0.59	0.95	0.27	0.55	0.95	0.2	0.43	0.84	0.36	0.6	0.85	0.4	0.6	0.88	0.03	0.2	0.5	0	0.09	0.44	0.23	0.65	0.98
chr7:146764081:146764168|146764117:+@chr7:146764253:146765556:+	ENSMUSG00000025477	Inpp5a	inositol polyphosphate-5-phosphatase A	-17	1.50505	9.78906	0.97	0.85	-0.13	-1.89038	0.95	0.98	0.99	0.95	0.98	1	0.92	0.96	0.98	0.79	0.9	0.97	0.9	0.96	1	0.66	0.77	0.88	0.94	0.97	0.99	0.87	0.92	0.96	0.83	0.92	0.98	0.89	0.94	0.98	0.8	0.85	0.92	0.83	0.94	0.99	0.86	0.95	0.99
chr9:37209481:37209736:+@chr9:37210140:37210472:+@chr9:37210737:37210894:+	ENSMUSG00000032125	Robo4	roundabout homolog 4	-1	0.0808081	0.906506	0.93	0.87	-0.05	-1.19228	0.8	0.93	0.99	0.8	0.93	1	0.79	0.92	0.99	0.79	0.92	1	0.67	0.87	0.98	0.76	0.91	0.99	0.91	0.97	1	0.85	0.94	1	0.89	0.96	1	0.87	0.94	0.99	0.91	0.97	0.99	0.75	0.89	0.98	0.77	0.91	0.99
chr7:148655836:148655910:+@chr7:148656020:148656124:+@chr7:148656209:148656861:+	ENSMUSG00000025510	Cd151	CD151 antigen	n/a	n/a	n/a	n/a	n/a	n/a	n/a	0.97	0.99	1	0.97	0.99	1	0.96	0.99	1	0.96	0.99	1	0.95	0.98	1	0.91	0.97	1	0.99	1	1	0.99	1	1	0.99	1	1	0.99	1	1	0.98	0.99	1	0.93	0.98	1	0.94	0.98	1
chr4:125760126:125760229:+@chr4:125760656|125760840:125760968:+	ENSMUSG00000042616	OSCP1,1810007P19Rik	Mus musculus mRNA for organic solute carrier 1,oxidored-nitro domain-containing protein, partial cds.	n/a	n/a	n/a	n/a	n/a	n/a	n/a	n/a	n/a	n/a	n/a	n/a	n/a	n/a	n/a	n/a	n/a	n/a	n/a	n/a	n/a	n/a	n/a	n/a	n/a	n/a	n/a	n/a	n/a	n/a	n/a	n/a	n/a	n/a	n/a	n/a	n/a	n/a	n/a	n/a	n/a	n/a	n/a	n/a	n/a	n/a
chr5:109987824:109988163:-@chr5:109986633|109986768:109986537:-	ENSMUSG00000033467	Tpte2	transmembrane phosphoinositide 3-phosphatase and	n/a	n/a	n/a	n/a	n/a	n/a	n/a	n/a	n/a	n/a	0.29	0.65	0.96	0.42	0.67	0.91	n/a	n/a	n/a	n/a	n/a	n/a	0.34	0.73	0.98	0.23	0.46	0.71	0.24	0.45	0.75	n/a	n/a	n/a	0.18	0.41	0.72	0.35	0.62	0.88	n/a	n/a	n/a	n/a	n/a	n/a
chr6:117793271:117793414|117793410:+@chr6:117795043:117795976:+	ENSMUSG00000059689	n/a	n/a	-3	-0.111111	2.94697	0.24	0.25	0.01	-0.980292	0.1	0.37	0.7	0.04	0.2	0.44	0	0.15	0.45	0.05	0.26	0.55	0.1	0.48	0.86	0.12	0.29	0.5	0.03	0.18	0.54	0.01	0.11	0.29	0.07	0.24	0.46	0.25	0.46	0.68	0.01	0.15	0.45	0.01	0.13	0.32	0.01	0.11	0.29
chr11:62349784:62349882:-@chr11:62347548:62347724:-@chr11:62347387:62347456:-	ENSMUSG00000018509	Prr6	Proline-rich protein 6.	16	2.31313	12.5389	0.03	0.28	0.25	1.09155	0	0.02	0.07	0.01	0.04	0.08	0	0.04	0.12	0.05	0.13	0.23	0.03	0.11	0.23	0	0.02	0.04	0	0.02	0.07	0.36	0.62	0.86	0.03	0.13	0.31	0	0.05	0.14	0.07	0.15	0.27	0.12	0.28	0.5	0.05	0.21	0.55
chr15:76330291:76330483:+@chr15:76330561|76330697:76330766:+	ENSMUSG00000022556	Hsf1	RIKEN full-length enriched library,Hsf1 protein., full insert sequence.,heat shock factor 1, clone:1110037G23 product:heat shock factor 1,Mus musculus 18-day embryo whole body cDNA	-22	1.34343	10.7883	0.61	0.44	-0.17	-2.16378	0.29	0.46	0.67	0.42	0.66	0.93	0.5	0.71	0.92	0.31	0.52	0.73	0.3	0.51	0.69	0.35	0.58	0.85	0.48	0.68	0.89	0.59	0.82	0.98	0.74	0.91	1	0.77	0.91	0.98	0.42	0.6	0.8	0.38	0.59	0.84	0.22	0.38	0.59
chr5:130494474:130494418|130494416:-@chr5:130494180:130494277:-	ENSMUSG00000025533	n/a	argininosuccinate lyase	n/a	n/a	n/a	n/a	n/a	n/a	n/a	0.04	0.36	0.82	n/a	n/a	n/a	n/a	n/a	n/a	n/a	n/a	n/a	n/a	n/a	n/a	n/a	n/a	n/a	0.02	0.31	0.76	0.03	0.44	0.91	n/a	n/a	n/a	n/a	n/a	n/a	n/a	n/a	n/a	n/a	n/a	n/a	n/a	n/a	n/a
chr7:26305833:26305950:-@chr7:26304982:26305034:-@chr7:26304178:26304209:-	ENSMUSG00000054385	Ceacam2	CEA-related cell adhesion molecule 2	n/a	n/a	n/a	n/a	n/a	n/a	n/a	0.65	0.9	0.99	0.59	0.86	0.98	0.03	0.4	0.93	0.34	0.76	1	n/a	n/a	n/a	0.32	0.69	0.97	0.77	0.9	1	0.18	0.64	0.95	0.82	0.93	0.99	0.69	0.9	0.99	0.59	0.88	1	n/a	n/a	n/a	n/a	n/a	n/a
chr11:60019812:60019690|60019675:-@chr11:60019331:60019579:-	ENSMUSG00000020538	Srebf1	sterol regulatory element binding factor 1	5	-0.111111	7.8004	0.86	0.81	-0.06	0.655237	0.68	0.87	0.99	0.63	0.85	0.98	0.67	0.87	0.98	0.23	0.64	0.94	0.34	0.69	0.93	0.12	0.32	0.59	0.33	0.6	0.84	0.4	0.74	0.97	0.01	0.25	0.69	0.2	0.57	0.92	0.61	0.81	0.97	0.47	0.81	0.99	0.17	0.49	0.92
chr7:31375815:31375888:-@chr7:31375652:31375720:-@chr7:31375375:31375539:-	n/a	na/a	n/a	n/a	n/a	n/a	n/a	n/a	n/a	n/a	n/a	n/a	n/a	n/a	n/a	n/a	n/a	n/a	n/a	n/a	n/a	n/a	n/a	n/a	n/a	n/a	n/a	n/a	n/a	n/a	n/a	n/a	n/a	n/a	n/a	n/a	n/a	n/a	n/a	n/a	n/a	n/a	n/a	n/a	n/a	n/a	n/a	n/a	n/a
chr16:36761909:36761995:-@chr16:36761739|36761798:36761650:-	ENSMUSG00000022899	Slc15a2	solute carrier family 15 (H+/peptide	n/a	n/a	n/a	n/a	n/a	n/a	n/a	0.04	0.27	0.62	n/a	n/a	n/a	n/a	n/a	n/a	0.24	0.58	0.89	n/a	n/a	n/a	n/a	n/a	n/a	0.03	0.11	0.28	0	0.08	0.21	0.05	0.18	0.4	0	0.07	0.24	n/a	n/a	n/a	0.03	0.2	0.5	n/a	n/a	n/a
chr11:96771255:96771343:-@chr11:96770212|96770233:96770028:-	ENSMUSG00000018669	Cdk5rap3	full insert sequence., clone:C730002A11 product:CDK5 ACTIVATOR-BINDING PROTEIN homolog [Rattus norvegicus],CDK5 regulatory subunit associated protein 3,Mus musculus adult male liver tumor cDNA, RIKEN full-length enriched library	n/a	n/a	n/a	n/a	n/a	n/a	n/a	0.66	0.9	0.99	0.71	0.89	0.99	0.61	0.88	1	0.8	0.95	1	0.63	0.89	1	0.45	0.75	0.97	0.78	0.92	0.99	0.77	0.93	0.99	0.69	0.88	0.99	0.56	0.86	1	0.71	0.89	1	0.54	0.81	0.99	0.71	0.88	0.98
chr17:21703942:21704209:+@chr17:21705980|21706031:21706091:+	n/a	n/a	n/a	n/a	n/a	n/a	n/a	n/a	n/a	n/a	0.11	0.51	0.95	0.06	0.52	0.91	0.03	0.33	0.77	0.07	0.4	0.88	n/a	n/a	n/a	0.12	0.53	0.98	0.04	0.3	0.73	0.04	0.29	0.71	0.08	0.47	0.89	0.07	0.35	0.69	0.06	0.45	0.9	0.09	0.63	0.96	0.14	0.54	0.95
chr11:54601062:54601257:-@chr11:54569908:54570061:-@chr11:54553064:54554052:-	ENSMUSG00000052298	Cdc42se2	CDC42 small effector 2	n/a	n/a	n/a	n/a	n/a	n/a	n/a	0.86	0.94	0.99	0.8	0.93	0.99	0.89	0.96	1	0.9	0.97	1	0.8	0.93	0.99	0.87	0.95	0.99	0.92	0.97	1	0.93	0.98	1	0.91	0.97	1	0.94	0.98	1	0.81	0.94	1	0.88	0.96	1	0.74	0.9	1
chr1:78463542:78463593:-@chr1:78461586:78461661:-@chr1:78459847:78459908:-	ENSMUSG00000026245	Farsb,Farslb	RCB-0545 OHTA cDNA, RIKEN full-length enriched library,phenylalanyl-tRNA synthetase, clone:6330566I21 product:phenylalanine-tRNA synthetase-like, full insert sequence (Farslb protein)., beta subunit, clone:G430090C12 product:phenylalanine-tRNA synthetase-like, full insert sequence.,Adult male medulla oblongata cDNA	n/a	n/a	n/a	n/a	n/a	n/a	n/a	0	0.03	0.09	0.01	0.05	0.15	0.01	0.07	0.21	0	0.03	0.09	0.01	0.08	0.27	0.03	0.12	0.26	0.03	0.07	0.13	0	0.03	0.11	0	0.02	0.06	0.01	0.06	0.15	0	0.03	0.1	0	0.04	0.14	0.01	0.05	0.16
chr12:114282437:114282524:+@chr12:114283689:114283778:+@chr12:114285240:114285365:+	ENSMUSG00000021143	Pacs2	phosphofurin acidic cluster sorting protein 2, full insert sequence.,Adult male testis cDNA, clone:4932414L12 product:hypothetical Serine-rich region profile containing protein, RIKEN full-length enriched library	n/a	n/a	n/a	n/a	n/a	n/a	n/a	0.77	0.91	0.99	0.81	0.94	1	0.72	0.91	0.99	0.63	0.84	0.97	0.47	0.76	0.98	0.53	0.82	0.97	0.66	0.89	1	0.84	0.94	0.99	0.69	0.89	1	0.72	0.9	0.99	0.63	0.84	0.97	0.5	0.79	0.99	0.65	0.89	0.99
chrX:136533039:136533136:-@chrX:136529767|136529935:136529651:-	ENSMUSG00000031433	Rbm41	RIKEN full-length enriched library,Mus musculus 0 day neonate thymus cDNA, clone:A430077K06 product:similar to BB383K5.1 [Homo sapiens],RNA-binding protein 41 (RNA-binding motif protein 41)., full insert sequence.,RNA binding motif protein 41	n/a	n/a	n/a	n/a	n/a	n/a	n/a	n/a	n/a	n/a	n/a	n/a	n/a	n/a	n/a	n/a	0.01	0.07	0.27	n/a	n/a	n/a	n/a	n/a	n/a	n/a	n/a	n/a	0.01	0.07	0.24	0	0.06	0.22	0	0.04	0.14	n/a	n/a	n/a	n/a	n/a	n/a	n/a	n/a	n/a
chr14:65445609:65445704:-@chr14:65444526|65444529:65444438:-	ENSMUSG00000021972	Hmbox1	Adult male pituitary gland cDNA,homeobox containing 1, clone:5330438L16 product:similar to Hypothetical homeobox domain containing protein., RIKEN full-length enriched library	n/a	n/a	n/a	n/a	n/a	n/a	n/a	0.42	0.77	0.97	0.03	0.42	0.91	n/a	n/a	n/a	n/a	n/a	n/a	n/a	n/a	n/a	n/a	n/a	n/a	0.61	0.86	0.98	0.36	0.82	0.99	0.35	0.72	0.96	0.59	0.83	0.99	0.55	0.81	0.97	0.45	0.81	0.98	0.16	0.55	0.94
chr11:97008687:97008867:-@chr11:97007944|97007947:97007769:-	ENSMUSG00000038517	Tbkbp1	Mus musculus 13 days embryo head cDNA, clone:3110043L15 product:unclassifiable, RIKEN full-length enriched library	-1	-0.0808081	0.860782	0.31	0.31	0	-1.06786	0.01	0.3	0.92	0.04	0.23	0.7	0.01	0.4	0.91	0.02	0.34	0.91	0.07	0.47	0.85	0.03	0.29	0.67	0.07	0.36	0.77	0.04	0.26	0.67	0.22	0.67	0.99	0.02	0.23	0.68	0.09	0.56	0.99	0.04	0.46	0.99	0.05	0.35	0.77
chr9:30965280:30965432:-@chr9:30963775:30963810:-@chr9:30960999:30961084:-	ENSMUSG00000031996	Aplp2	amyloid beta (A4) precursor-like protein 2,Mus musculus 2 days neonate thymus thymic cells cDNA, full insert sequence., clone:E430014K10 product:amyloid beta (A4) precursor-like protein 2, RIKEN full-length enriched library	-24	1.44444	14.6675	0.46	0.31	-0.16	-1.73475	0.37	0.46	0.56	0.36	0.44	0.53	0.39	0.49	0.6	0.34	0.45	0.57	0.32	0.4	0.5	0.41	0.51	0.62	0.26	0.32	0.38	0.28	0.33	0.39	0.2	0.26	0.33	0.22	0.27	0.33	0.35	0.45	0.55	0.42	0.52	0.62	0.42	0.52	0.62
chr11:70251446:70251530:+@chr11:70251821:70251893:+	n/a	n/a	n/a	n/a	n/a	n/a	n/a	n/a	n/a	n/a	0.07	0.15	0.27	0.06	0.14	0.25	0.04	0.1	0.19	0.26	0.43	0.64	0.25	0.6	0.94	0.2	0.44	0.81	0.3	0.63	0.91	0.28	0.5	0.8	0.5	0.74	0.95	0.23	0.39	0.62	0.11	0.23	0.39	0.11	0.31	0.58	0.19	0.52	0.89
chr7:132792083:132791911|132791907:-@chr7:132790175:132791141:-	ENSMUSG00000032777	Gtf3c1,AK134249	general transcription factor III C 1,Mus musculus 13 days embryo forelimb cDNA, RIKEN full-length enriched library, clone:5930402K09 product:general transcription factor III C 1,General transcription factor 3C polypeptide 1 (Transcription factor IIIC-subunit alpha) (TF3C-alpha) (TFIIIC 220 kDa subunit) (TFIIIC220) (TFIIIC box B-binding subunit)., full insert sequence.	n/a	n/a	n/a	n/a	n/a	n/a	n/a	0	0.05	0.15	0	0.04	0.14	0	0.02	0.08	0	0.04	0.13	0	0.11	0.36	0.01	0.04	0.11	0.01	0.05	0.14	0	0.04	0.1	0	0.04	0.12	0	0.06	0.18	0	0.03	0.1	0.01	0.03	0.09	0	0.04	0.13
chr9:54217017:54217069:-@chr9:54215361:54215578:-	n/a	n/a	n/a	7	1.34343	20.2829	0.24	0.35	0.11	0.278883	0.26	0.33	0.42	0.13	0.18	0.24	0.14	0.21	0.29	0.37	0.51	0.66	0.17	0.24	0.35	0.17	0.22	0.29	0.49	0.63	0.77	0.48	0.66	0.87	0.59	0.75	0.93	0.5	0.61	0.73	0.38	0.56	0.73	0.28	0.41	0.6	0.24	0.36	0.49
chr5:100909217:100909340:-@chr5:100904846|100904850:100904708:-	ENSMUSG00000035310	Lin54,AI461788,mKIAA2037	clone:4832414L08 product:weakly similar to TESMIN (METALLOTHIONEIN-LIKE 5,lin-54 homolog, RIKEN full-length enriched library,18-day embryo whole body cDNA,13 days embryo male testis cDNA, clone:1190012C08 product:hypothetical protein, full insert sequence., TESTIS-SPECIFIC) (TESTIS-SPECIFIC METALLOTHIONEIN-LIKE PROTEIN) [Homo sapiens],Mus musculus 0 day neonate head cDNA, clone:6030414I06 product…	n/a	n/a	n/a	n/a	n/a	n/a	n/a	n/a	n/a	n/a	n/a	n/a	n/a	n/a	n/a	n/a	n/a	n/a	n/a	n/a	n/a	n/a	n/a	n/a	n/a	0.27	0.69	0.96	n/a	n/a	n/a	n/a	n/a	n/a	0.04	0.43	0.82	0.03	0.51	0.97	0.18	0.57	0.96	0	0.37	0.74
chr6:47785659:47785919:+@chr6:47790251:47790646:+@chr6:47808928:47809054:+	ENSMUSG00000062519	Zfp398	Adult male corpora quadrigemina cDNA, clone:B230352J12 product:hypothetical protein, RIKEN full-length enriched library	n/a	n/a	n/a	n/a	n/a	n/a	n/a	0.53	0.83	0.99	0.6	0.85	0.98	0.64	0.89	0.99	0.29	0.69	0.95	0.63	0.86	0.99	0.68	0.89	0.99	0.65	0.88	0.99	0.67	0.88	0.99	0.49	0.79	0.98	0.72	0.89	0.99	0.74	0.91	0.99	0.47	0.81	0.99	0.64	0.86	0.99
chr6:52506432:52506909:-@chr6:52498809:52498965:-@chr6:52496219:52497056:-	ENSMUSG00000029776	Hibadh,AK042028	full insert sequence., clone:A630053A06 product:unclassifiable,Mus musculus 3 days neonate thymus cDNA,3-hydroxyisobutyrate dehydrogenase precursor, RIKEN full-length enriched library	n/a	n/a	n/a	n/a	n/a	n/a	n/a	0.99	1	1	0.99	1	1	0.99	1	1	0.99	1	1	0.98	0.99	1	0.99	1	1	0.99	1	1	0.98	0.99	1	0.99	1	1	0.99	1	1	0.99	1	1	0.98	1	1	0.98	0.99	1
chr17:24861132:24861423:-@chr17:24859738|24859783:24859600:-	ENSMUSG00000040048	Ndufb10	NADH dehydrogenase (ubiquinone) 1 beta	30	-1	13.8957	0.01	0.03	0.01	2.2309	0.01	0.01	0.02	0	0.01	0.01	0.01	0.02	0.03	0	0.01	0.01	0	0.01	0.02	0	0	0.01	0	0.01	0.01	0.02	0.03	0.03	0.01	0.01	0.02	0.01	0.01	0.01	0.04	0.05	0.07	0.03	0.04	0.05	0.01	0.02	0.04
chr11:120656791:120657704:-@chr11:120656292|120656325:120656217:-	ENSMUSG00000025155	Dus1l	PP3111 protein	n/a	n/a	n/a	n/a	n/a	n/a	n/a	0.84	0.95	1	0.78	0.94	1	0.8	0.94	0.99	0.55	0.87	0.99	0.6	0.85	0.99	0.78	0.93	1	0.74	0.93	0.99	0.65	0.89	0.99	0.66	0.86	0.98	0.72	0.88	0.99	0.63	0.87	0.99	0.66	0.89	1	0.48	0.79	0.99
chr5:130009858:130010027|130009980:+@chr5:130010638:130010769:+	ENSMUSG00000029439	Sfrs8	RIKEN full-length enriched library,Mus musculus adult male medulla oblongata cDNA,splicing factor, full insert sequence., arginine/serine-rich 8, clone pFL2) (fragment) homolog [Homo sapiens], clone:6330437E22 product:splicing regulatory protein SWAP homolog (alternatively spliced	6	-0.808081	7.6748	0.82	0.79	-0.02	0.887069	0.65	0.85	0.98	0.59	0.82	0.97	0.54	0.78	0.97	0.15	0.42	0.85	0.42	0.77	0.97	0.34	0.57	0.8	0.4	0.58	0.77	0.52	0.69	0.85	0.65	0.89	0.99	0.3	0.55	0.83	0.28	0.57	0.84	0.18	0.37	0.61	0.34	0.56	0.78
chr1:40056440:40056819:+@chr1:40057376|40057469:40057594:+	ENSMUSG00000026074	Map4k4	mitogen-activated protein kinase kinase kinase	-13	1.11111	13.8804	0.72	0.65	-0.08	-1.01662	0.59	0.73	0.86	0.65	0.76	0.86	0.52	0.68	0.82	0.56	0.68	0.79	0.62	0.76	0.87	0.57	0.7	0.82	0.6	0.69	0.78	0.81	0.86	0.9	0.71	0.78	0.85	0.76	0.82	0.88	0.82	0.89	0.96	0.69	0.85	0.97	0.62	0.73	0.84
chr1:60181695:60181755:+@chr1:60181923:60181989:+@chr1:60182764:60182878:+	ENSMUSG00000026017	Carf	strain=C57BL/6J),strain=BALB/c),Mus musculus cDNA pooled tissues:(tissue_type=brain,(tissue_type=testis,dev_stage=8-12 days neonate, clone:V01X013M01.,calcium response factor,dev_stage=adult	n/a	n/a	n/a	n/a	n/a	n/a	n/a	n/a	n/a	n/a	n/a	n/a	n/a	n/a	n/a	n/a	n/a	n/a	n/a	n/a	n/a	n/a	n/a	n/a	n/a	n/a	n/a	n/a	0.01	0.16	0.56	0	0.18	0.64	n/a	n/a	n/a	n/a	n/a	n/a	n/a	n/a	n/a	n/a	n/a	n/a
chr8:27230912:27231035:+@chr8:27234319:27234459:+@chr8:27236376:27236711:+	ENSMUSG00000013878	Rnf170	full insert sequence.,ring finger protein 170, clone:6720407G21 product:6720407G21Rik protein (Hypothetical RING finger containing protein),Mus musculus 12 days embryo male wolffian duct includes surrounding region cDNA, RIKEN full-length enriched library	n/a	n/a	n/a	n/a	n/a	n/a	n/a	0.84	0.95	1	0.79	0.93	1	0.8	0.93	0.99	0.7	0.91	0.99	0.7	0.89	0.99	0.6	0.86	0.98	0.88	0.96	0.99	0.85	0.95	1	0.69	0.9	1	0.72	0.93	1	0.73	0.93	1	0.82	0.94	1	0.66	0.88	0.98
chr4:148450129:148450176:-@chr4:148415830:148415914:-@chr4:148357597:148358274:-	ENSMUSG00000028975	Pex14	peroxisomal biogenesis factor 14	n/a	n/a	n/a	n/a	n/a	n/a	n/a	0.87	0.97	1	0.9	0.97	1	0.88	0.96	1	0.82	0.95	1	0.77	0.91	0.99	0.9	0.97	1	0.92	0.98	1	0.93	0.98	1	0.92	0.97	1	0.94	0.98	1	0.91	0.98	1	0.81	0.94	0.99	0.74	0.92	1
chr11:102154590:102154758:-@chr11:102154409|102154466:102154381:-	ENSMUSG00000059995	Atxn7l3	clone:G630066D20 product:hypothetical protein,Mus musculus 13 days embryo spinal cord cDNA, full insert sequence.,ataxin 7-like 3 isoform a, RIKEN full-length enriched library	-10	-0.292929	10.4758	0.35	0.33	-0.02	-0.926618	0.2	0.5	0.84	0.05	0.2	0.42	0.12	0.35	0.64	0.19	0.46	0.75	0.03	0.21	0.52	0.63	0.88	0.99	0.13	0.3	0.48	0.13	0.35	0.65	0.23	0.55	0.88	0.31	0.55	0.79	0.15	0.35	0.57	0.33	0.56	0.81	0.19	0.41	0.78
chr12:105136968:105137599:-@chr12:105135251:105135521:-@chr12:105058095:105058365:-@chr12:105057059:105057209:-	ENSMUSG00000079015	Serpina1c	serine (or cysteine) proteinase inhibitor	n/a	n/a	n/a	n/a	n/a	n/a	n/a	0.73	0.94	1	0.76	0.92	1	0.24	0.72	0.98	0.3	0.7	0.93	0.43	0.82	0.99	0.69	0.9	1	0.85	0.94	0.99	0.84	0.95	1	0.69	0.89	0.99	0.89	0.97	1	0.76	0.92	0.99	0.71	0.91	0.99	0.48	0.79	0.98
chr4:40644250:40644386:-@chr4:40642451|40642456:40642410:-	ENSMUSG00000028411	Aptx	Aprataxin homolog (Forkhead-associated domain histidine triad-like protein) (FHA-HIT).,aprataxin isoform b	-8	0.727273	6.08329	0.77	0.7	-0.07	-1.43463	0.36	0.7	0.94	0.52	0.77	0.97	0.59	0.84	0.99	0.33	0.59	0.8	0.23	0.7	0.95	0.11	0.45	0.78	0.51	0.73	0.89	0.41	0.65	0.84	0.66	0.8	0.91	0.7	0.83	0.93	0.61	0.8	0.94	0.49	0.81	0.98	0.46	0.79	0.98
chr3:89144323:89144394:-@chr3:89144095|89144101:89143977:-	ENSMUSG00000028041	Adam15	Mus musculus metalloprotease-disintegrin MDC15 mRNA	n/a	n/a	n/a	n/a	n/a	n/a	n/a	0.64	0.87	0.99	0.3	0.74	0.97	0.79	0.94	1	0.77	0.94	1	0.36	0.7	0.99	0.5	0.83	0.98	0.56	0.84	1	0.55	0.82	0.97	0.61	0.82	0.96	0.49	0.81	0.98	0.83	0.94	0.99	0.68	0.88	0.99	0.47	0.83	0.98
chr5:48611156:48611319:+@chr5:48612206:48612229:+@chr5:48615892:48616042:+	n/a	na/a	n/a	n/a	n/a	n/a	n/a	n/a	n/a	n/a	n/a	n/a	n/a	n/a	n/a	n/a	n/a	n/a	n/a	n/a	n/a	n/a	n/a	n/a	n/a	n/a	n/a	n/a	n/a	n/a	n/a	n/a	n/a	n/a	n/a	n/a	n/a	n/a	n/a	n/a	n/a	n/a	n/a	n/a	n/a	n/a	n/a	n/a	n/a
chr2:155965465:155965548:-@chr2:155960142:155960294:-@chr2:155958369:155958462:-	ENSMUSG00000027618	Nfs1	yeast homolog 1,nitrogen fixation gene	n/a	n/a	n/a	n/a	n/a	n/a	n/a	0.94	0.98	1	0.94	0.98	1	0.95	0.98	1	0.96	0.99	1	0.86	0.96	0.99	0.97	0.99	1	0.98	0.99	1	0.95	0.99	1	0.97	0.99	1	0.97	0.99	1	0.95	0.98	1	0.9	0.97	1	0.92	0.98	1
chr8:125001077:125001160|125001136:+@chr8:125002085:125002145:+	ENSMUSG00000049482	2310061F22Rik	full insert sequence., clone:2700055L20 product:hypothetical Adenine nucleotide alpha hydrolases structure containing protein,Mus musculus 11 days embryo whole body cDNA,hypothetical protein LOC66965, RIKEN full-length enriched library	n/a	n/a	n/a	n/a	n/a	n/a	n/a	0.02	0.13	0.36	0	0.08	0.29	0	0.09	0.28	n/a	n/a	n/a	0.01	0.14	0.44	n/a	n/a	n/a	0	0.09	0.28	0.01	0.15	0.44	n/a	n/a	n/a	n/a	n/a	n/a	0.02	0.25	0.77	0.01	0.14	0.52	n/a	n/a	n/a
chr14:27279390:27279440:-@chr14:27278896:27278946:-@chr14:27262061:27262120:-	ENSMUSG00000021870	Slmap,mKIAA1601	alternatively spliced., complete cds,Mus musculus sarcolemmal associated protein 1 mRNA,sarcolemma associated protein	31	-0.0505051	14.8061	0.43	0.65	0.22	2.09715	0.22	0.38	0.55	0.24	0.51	0.86	0.18	0.41	0.69	0.12	0.25	0.43	0.17	0.35	0.6	0.14	0.27	0.44	0.31	0.44	0.59	0.43	0.59	0.74	0.27	0.41	0.64	0.42	0.58	0.78	0.18	0.37	0.81	0.38	0.61	0.87	0.13	0.3	0.53
chr19:3941520:3941681:+@chr19:3941885:3942017:+@chr19:3942349:3942442:+	ENSMUSG00000036908	Unc93b1	Mus musculus adult male pituitary gland cDNA, full insert sequence., clone:5330418K19 product:UNC-93 RELATED PROTEIN (FRAGMENT) homolog [Mus musculus],unc93 homolog B, RIKEN full-length enriched library	n/a	n/a	n/a	n/a	n/a	n/a	n/a	0.57	0.83	0.99	0.54	0.8	0.97	0.29	0.61	0.93	0.66	0.87	0.99	0.64	0.84	0.98	0.76	0.9	0.99	0.62	0.85	0.99	0.83	0.93	0.99	0.55	0.83	0.97	0.72	0.88	0.98	0.68	0.89	0.99	0.63	0.88	0.99	0.4	0.75	0.99
chr11:4886826:4887054:+@chr11:4902971:4903130:+@chr11:4909533:4909595:+	ENSMUSG00000009090	Ap1b1	beta 1 subunit,adaptor protein complex AP-1	1	-0.0707071	0.879078	0.02	0.06	0.04	1.21799	0	0.02	0.06	0	0.03	0.1	0	0.02	0.05	0.02	0.1	0.24	0	0.07	0.26	0	0.02	0.07	0	0.01	0.03	0	0.02	0.06	0.01	0.05	0.13	0.01	0.03	0.07	0	0.01	0.05	0	0.02	0.06	0.01	0.08	0.23
chr3:146139158:146139266:-@chr3:146138220:146138345:-@chr3:146132540:146132767:-	ENSMUSG00000028188	Spata1	spermatogenesis associated 1	n/a	n/a	n/a	n/a	n/a	n/a	n/a	n/a	n/a	n/a	n/a	n/a	n/a	n/a	n/a	n/a	0.19	0.56	0.89	n/a	n/a	n/a	0.16	0.57	0.9	0.2	0.64	0.96	0.04	0.49	0.93	0.09	0.41	0.8	0.3	0.67	0.94	n/a	n/a	n/a	0.18	0.55	0.89	n/a	n/a	n/a
chr7:104724098:104724201:-@chr7:104713661:104713810:-@chr7:104698841:104699251:-	ENSMUSG00000035642	1810020D17Rik	full insert sequence., clone:1810037D19 product:Weakly similar to PTD015, RIKEN full-length enriched library,UPF0366 protein C11orf67 homolog.,10 day old male pancreas cDNA	-30	0.676768	11.6514	0.95	0.69	-0.27	-2.63289	0.91	0.97	1	0.84	0.95	0.99	0.85	0.94	0.99	0.92	0.98	1	0.86	0.96	1	0.75	0.85	0.94	0.79	0.91	0.98	0.83	0.92	0.99	0.87	0.96	1	0.88	0.96	1	0.82	0.91	0.97	0.86	0.96	1	0.71	0.89	0.98
chr4:108239558:108239511|108239510:-@chr4:108235773:108237872:-	ENSMUSG00000063800	Prpf38a,2410002M20Rik	WEAKLY SIMILAR TO SPLICING FACTOR, RIKEN full-length enriched library, CLONE PLACE1010194, ARGININE/SERINE-RICH 2 homolog [Homo sapiens], clone:2410002M20 product:CDNA FLJ14936 FIS, full insert sequence.,Mus musculus ES cells cDNA,PRP38 pre-mRNA processing factor 38 (yeast)	n/a	n/a	n/a	n/a	n/a	n/a	n/a	0.59	0.84	0.97	0.6	0.85	0.99	0.58	0.82	0.98	0.77	0.92	0.99	0.36	0.73	0.94	0.28	0.75	1	0.68	0.92	1	0.62	0.85	0.97	0.52	0.85	0.98	0.77	0.93	0.99	0.61	0.83	0.96	0.51	0.82	0.99	0.27	0.68	0.94
chr17:46811146:46811301:-@chr17:46809540|46809796:46809474:-	ENSMUSG00000023971	BC011248	hypothetical protein LOC224823	1	0.262626	2.85892	0.76	0.92	0.16	0.25792	0.51	0.74	0.93	0.5	0.75	0.94	0.54	0.8	0.98	0.7	0.9	0.98	0.6	0.85	0.98	0.75	0.92	1	0.84	0.95	0.99	0.5	0.71	0.91	0.52	0.84	1	0.78	0.92	0.99	0.55	0.75	0.95	0.45	0.64	0.87	0.65	0.87	1
chr4:19586710:19586894:-@chr4:19577263:19577587:-@chr4:19570513:19570608:-	ENSMUSG00000041058	Wwp1	WW domain-containing protein 1, RIKEN full-length enriched library,Wwp1 protein., full insert sequence.,Mus musculus 11 days embryo head cDNA, clone:6230411J22 product:WWP1 (FRAGMENT) homolog [Homo sapiens]	3	-0.232323	5.724	0.96	0.93	-0.03	0.564696	0.82	0.95	1	0.88	0.97	1	0.88	0.96	1	0.87	0.95	1	0.81	0.94	0.99	0.88	0.95	0.99	0.72	0.86	0.97	0.79	0.9	0.97	0.59	0.74	0.9	0.66	0.82	0.96	0.79	0.92	0.99	0.52	0.69	0.88	0.65	0.82	0.95
chr19:55998386:55998434:+@chr19:55999020:55999070:+@chr19:56001174:56001246:+@chr19:56005924:56008149:+	ENSMUSG00000024985	Tcf4,Tcf7l2	Transcription factor 7-like 2 (HMG box transcription factor 4) (T- cell-specific transcription factor 4) (TCF-4) (mTCF-4)., complete cds.,Mus musculus HMG-box transcription factor TCF4B (Tcf4) mRNA	-1	-0.0606061	2.79544	0.48	0.64	0.16	-0.336045	0.12	0.39	0.78	0.28	0.64	0.93	0.14	0.42	0.8	0.04	0.46	0.93	0.24	0.57	0.87	0.68	0.89	0.99	0.45	0.77	0.95	0.07	0.3	0.56	0.48	0.71	0.91	0.27	0.68	0.92	0.15	0.53	0.83	0.21	0.61	0.92	0.15	0.47	0.91
chr17:81431972:81432080:-@chr17:81429964:81430354:-@chr17:81425667:81426310:-	ENSMUSG00000024246	Thumpd2,AK032863	THUMP domain-containing protein 2., RIKEN full-length enriched library, 11 days embryo whole body cDNA,Mus musculus 10, full insert sequence., clone:2810025A12 product:hypothetical S-adenosyl-L-methionine-dependent methyltransferases structure containing protein	-6	0.030303	6.68702	0.98	0.96	-0.03	-0.901792	0.96	0.99	1	0.94	0.98	1	0.96	0.98	1	0.96	0.99	1	0.83	0.92	0.97	0.94	0.98	1	0.94	0.97	0.99	0.93	0.96	0.98	0.96	0.99	1	0.95	0.98	1	0.95	0.98	1	0.96	0.99	1	0.91	0.96	0.99
chr15:10913105:10913248:+@chr15:10914412|10914441:10914601:+	ENSMUSG00000022244	Amacr	alpha-methylacyl-CoA racemase	n/a	n/a	n/a	n/a	n/a	n/a	n/a	0	0.04	0.15	0	0.03	0.13	0.01	0.04	0.09	0	0.03	0.12	0	0.05	0.17	0	0.04	0.1	0	0.03	0.13	0.01	0.06	0.17	0	0.05	0.16	0	0.07	0.25	0	0.09	0.26	0.01	0.14	0.54	0	0.07	0.22
chr9:64900852:64900980:+@chr9:64901576:64901637:+@chr9:64902226:64902330:+	ENSMUSG00000032393	Dpp8	full insert sequence., clone:4932434F09 product:DIPEPTIDYL PEPTIDASE 8 homolog [Homo sapiens],Mus musculus adult male testis cDNA,dipeptidylpeptidase 8, RIKEN full-length enriched library	-1	-0.010101	0.926544	0.92	0.94	0.02	-1.06838	0.75	0.93	1	0.8	0.94	0.99	0.74	0.89	1	0.35	0.65	0.95	0.61	0.85	0.99	0.52	0.8	0.99	0.94	0.98	1	0.96	0.99	1	0.85	0.95	1	0.82	0.93	0.99	0.63	0.87	0.98	0.72	0.9	0.99	0.84	0.95	1
chr15:58765234:58765294:-@chr15:58762467:58762586:-@chr15:58758249:58760304:-	n/a	n/a	n/a	n/a	n/a	n/a	n/a	n/a	n/a	n/a	0.03	0.3	0.64	n/a	n/a	n/a	0.11	0.44	0.8	0.02	0.3	0.77	0.03	0.43	0.91	0.02	0.13	0.39	0.01	0.16	0.55	0	0.07	0.25	0.04	0.11	0.25	0	0.04	0.14	0.02	0.2	0.68	0.08	0.37	0.78	0.02	0.32	0.77
chr2:32147613:32147735:+@chr2:32152146:32152241:+@chr2:32152485:32152528:+	ENSMUSG00000002546	Golga2	golgin subfamily a,golgi autoantigen	-20	-2.38384	18.5667	0.74	0.54	-0.2	-0.948805	0.65	0.84	0.96	0.38	0.7	0.96	0.48	0.69	0.87	0.37	0.57	0.8	0.58	0.87	0.99	0.57	0.78	0.96	0.33	0.51	0.76	0.22	0.45	0.71	0.14	0.25	0.41	0.11	0.2	0.3	0.44	0.64	0.83	0.32	0.56	0.9	0.55	0.78	0.96
chr10:98481349:98481531:+@chr10:98481912:98482065:+@chr10:98485442:98488777:+	ENSMUSG00000019943	Atp2b1,AK027941	full insert sequence., clone:1110029B24 product:unclassifiable,Mus musculus 18-day embryo whole body cDNA,plasma membrane calcium ATPase 1, RIKEN full-length enriched library	-50	-2.77778	17.8798	0.52	0.26	-0.27	-2.64109	0.4	0.54	0.67	0.33	0.48	0.68	0.38	0.55	0.74	0.59	0.76	0.91	0.37	0.6	0.87	0.27	0.41	0.55	0.45	0.57	0.69	0.76	0.88	0.97	0.3	0.45	0.63	0.28	0.41	0.57	0.22	0.38	0.58	0.39	0.58	0.76	0.36	0.58	0.83
chr18:14798766:14798870:-@chr18:14795901:14795993:-@chr18:14795005:14795127:-	ENSMUSG00000037013	Ss18	Synovial sarcoma associated SS18-delta (13 days embryo lung cDNA, RIKEN full-length enriched library,synovial sarcoma translocation, Chromosome 18, clone:D430032A14 product:synovial sarcoma translocation, full insert sequence).	1	0.979798	8.0025	0.32	0.29	-0.02	0.00252446	0.19	0.35	0.55	0.21	0.37	0.56	0.11	0.23	0.38	0.11	0.21	0.37	0.29	0.48	0.71	0.03	0.1	0.21	0.2	0.36	0.55	0.05	0.13	0.25	0.26	0.51	0.81	0.15	0.35	0.55	0.07	0.16	0.31	0.13	0.27	0.46	0.16	0.32	0.53
chr5:137591982:137592079:-@chr5:137590789|137590823:137590659:-	ENSMUSG00000043279	Trim56	tripartite motif-containing 56	n/a	n/a	n/a	n/a	n/a	n/a	n/a	0.29	0.66	0.95	0.13	0.66	0.96	0.23	0.67	0.98	0.03	0.35	0.73	0.01	0.41	0.88	n/a	n/a	n/a	0.18	0.51	0.81	0.08	0.33	0.71	0.04	0.44	0.93	0.34	0.69	0.96	0.2	0.64	0.98	0.03	0.35	0.88	n/a	n/a	n/a
chr7:104601714:104601972:+@chr7:104603367:104603487:+@chr7:104606104:104607037:+	ENSMUSG00000051727	Kctd14	potassium channel tetramerisation domain	n/a	n/a	n/a	n/a	n/a	n/a	n/a	n/a	n/a	n/a	n/a	n/a	n/a	0.01	0.34	0.82	n/a	n/a	n/a	n/a	n/a	n/a	0.08	0.6	0.93	0.05	0.37	0.91	0.06	0.47	0.87	0.03	0.32	0.74	0.02	0.26	0.79	0.1	0.45	0.95	n/a	n/a	n/a	n/a	n/a	n/a
chr4:123047048:123047211:-@chr4:123046064:123046078:-@chr4:123045118:123045280:-	ENSMUSG00000028649	Macf,Macf1	MKIAA1251 protein (Fragment)., complete cds.,Macf1 protein (Fragment).,Mus musculus microtubule-actin crosslinking factor (Macf) mRNA	n/a	n/a	n/a	n/a	n/a	n/a	n/a	0	0.04	0.13	0.01	0.04	0.12	0	0.05	0.14	0.01	0.06	0.19	0.01	0.09	0.31	0	0.04	0.11	0	0.02	0.05	0	0.02	0.05	0	0.03	0.09	0	0.02	0.06	0	0.04	0.14	0	0.04	0.11	0.01	0.05	0.17
chr2:158186200:158186335:-@chr2:158185067|158185168:158184918:-	n/a	n/a	n/a	-3	0.939394	9.48877	0.69	0.58	-0.11	-0.415164	0.37	0.67	0.91	0.19	0.69	0.94	0.35	0.72	0.95	0.07	0.25	0.67	0.4	0.8	0.99	0.01	0.15	0.58	0.38	0.68	0.91	0.02	0.25	0.81	0.11	0.43	0.78	0.2	0.63	0.95	0.44	0.81	0.98	0.28	0.6	0.92	0.11	0.46	0.85
chr6:85401107:85401962:-@chr6:85398485:85398585:-@chr6:85397930:85398039:-	ENSMUSG00000030008	1700040I03Rik	clone:1700040I03 product:hypothetical Protease associated (PA) domain containing protein, full insert sequence.,Mus musculus adult male testis cDNA,hypothetical protein LOC73327, RIKEN full-length enriched library	n/a	n/a	n/a	n/a	n/a	n/a	n/a	0.72	0.9	0.98	0.6	0.87	0.99	0.78	0.93	0.99	0.34	0.73	0.96	0.43	0.79	1	0.3	0.73	0.98	0.43	0.79	0.98	0.9	0.97	1	0.7	0.9	0.99	0.76	0.93	0.99	0.62	0.87	0.98	0.6	0.85	1	0.63	0.87	0.99
chr2:25315529:25315877:-@chr2:25315295:25315435:-@chr2:25310641:25311168:-	n/a	n/a	n/a	n/a	n/a	n/a	n/a	n/a	n/a	n/a	0.76	0.92	1	0.71	0.92	1	0.64	0.86	0.98	0.65	0.86	0.98	0.33	0.68	0.96	0.31	0.62	0.98	0.72	0.89	0.98	0.55	0.81	1	0.54	0.84	0.99	0.84	0.95	0.99	0.86	0.95	1	0.74	0.93	1	0.45	0.81	0.97
chr13:38135778:38135847:+@chr13:38137142:38137184:+@chr13:38139114:38141025:+	ENSMUSG00000021428	Riok1	RIO kinase 1, clone:3110046C13 product:SIMILAR TO CG11660 GENE PRODUCT homolog.,Riok1 protein.,13 days embryo head cDNA, RIKEN full-length enriched library	1	0.010101	0.915577	0.75	0.93	0.19	1.08117	0.12	0.62	0.95	0.4	0.8	1	0.48	0.82	0.99	0.25	0.7	0.93	0.19	0.68	0.97	0.23	0.64	0.92	0.66	0.88	0.99	0.29	0.69	1	0.08	0.51	0.88	0.69	0.88	0.98	0.15	0.62	1	0.45	0.82	1	0.39	0.76	0.99
chr7:148496661:148497356:-@chr7:148493386:148493526:-@chr7:148486994:148487588:-	n/a	n/a	n/a	n/a	n/a	n/a	n/a	n/a	n/a	n/a	0.03	0.24	0.68	0.07	0.32	0.79	0.01	0.13	0.37	0.01	0.09	0.23	0.04	0.18	0.5	0.01	0.11	0.37	0.08	0.23	0.46	0.12	0.31	0.58	0.02	0.1	0.33	0.02	0.22	0.54	0	0.1	0.36	0.12	0.44	0.87	0.02	0.25	0.73
chr3:96090907:96091155:-@chr3:96089918|96090016:96089732:-	ENSMUSG00000015947	Fcgr1	Fc receptor, IgG	n/a	n/a	n/a	n/a	n/a	n/a	n/a	n/a	n/a	n/a	n/a	n/a	n/a	n/a	n/a	n/a	n/a	n/a	n/a	n/a	n/a	n/a	n/a	n/a	n/a	n/a	n/a	n/a	0.42	0.73	0.96	n/a	n/a	n/a	n/a	n/a	n/a	0.24	0.71	0.98	n/a	n/a	n/a	n/a	n/a	n/a
chr5:139469338:139469246|139469242:-@chr5:139464303:139464407:-	ENSMUSG00000025856	Pdgfa	alpha,platelet derived growth factor	n/a	n/a	n/a	n/a	n/a	n/a	n/a	0.31	0.75	0.99	0.53	0.86	1	0.53	0.83	1	0.4	0.74	0.95	0.12	0.63	0.99	0.73	0.9	0.99	0.63	0.86	0.99	0.37	0.73	0.92	0.02	0.47	0.94	0.24	0.65	0.94	0.59	0.85	0.98	0.58	0.85	1	0.35	0.77	0.98
chr1:93285041:93284932|93284922:-@chr1:93283792:93283918:-	ENSMUSG00000026309	Ilkap	Integrin-linked kinase-associated serine/threonine phosphatase 2C (EC 3.1.3.16) (ILKAP)., partial cds.,Mus musculus clone mouse1-1 putative protein phosphatase type 2C mRNA	n/a	n/a	n/a	n/a	n/a	n/a	n/a	0.47	0.75	0.93	0.54	0.85	0.98	0.38	0.75	0.97	0.61	0.86	0.99	0.57	0.86	0.99	0.78	0.92	0.99	0.69	0.85	0.96	0.8	0.93	0.99	0.64	0.87	0.97	0.62	0.8	0.93	0.41	0.69	0.94	0.34	0.71	0.98	0.54	0.79	0.94
chr7:6344708:6345006:+@chr7:6345304:6345423:+@chr7:6346077:6349625:+	n/a	n/a	n/a	-3	0.010101	2.01256	0.28	0.22	-0.06	-1.49566	0.01	0.21	0.59	0.01	0.18	0.7	0.02	0.44	0.92	0.03	0.32	0.8	0.2	0.59	0.91	0.04	0.39	0.93	0.02	0.18	0.6	0.01	0.15	0.52	0.01	0.09	0.3	0.01	0.16	0.51	0.07	0.29	0.68	0.01	0.33	0.85	0.03	0.39	0.93
chr12:113182368:113182696:-@chr12:113182096:113182277:-@chr12:113180194:113181422:-	n/a	na/a	n/a	n/a	n/a	n/a	n/a	n/a	n/a	n/a	n/a	n/a	n/a	n/a	n/a	n/a	n/a	n/a	n/a	n/a	n/a	n/a	n/a	n/a	n/a	n/a	n/a	n/a	n/a	n/a	n/a	n/a	n/a	n/a	n/a	n/a	n/a	n/a	n/a	n/a	n/a	n/a	n/a	n/a	n/a	n/a	n/a	n/a	n/a
chr2:25416060:25416220:+@chr2:25416472|25416489:25416582:+	ENSMUSG00000015092	Edf1	endothelial differentiation-related factor 1	n/a	n/a	n/a	n/a	n/a	n/a	n/a	0	0.01	0.02	0	0.01	0.02	0	0	0.01	0	0	0.01	0	0.01	0.03	0	0	0.01	0	0.01	0.03	0	0	0.01	0	0	0.01	0	0	0.01	0	0	0.01	0	0.01	0.04	0	0.02	0.04
chr13:64310415:64310512:-@chr13:64306579:64306725:-@chr13:64302640:64302756:-	ENSMUSG00000033102	Cdc14b	CDC14 cell division cycle 14 homolog B, full insert sequence., clone:A530086E13 product:TYROSINE PHOSPHATASE homolog [Homo sapiens],Mus musculus adult male aorta and vein cDNA, RIKEN full-length enriched library	6	0.242424	6.0287	0.63	0.66	0.03	0.955027	0.48	0.74	0.95	0.39	0.71	0.93	0.24	0.44	0.73	0.07	0.26	0.56	0.5	0.74	0.96	0.27	0.53	0.83	0.27	0.52	0.82	0.2	0.38	0.58	0.2	0.5	0.88	0.11	0.32	0.62	0.17	0.39	0.67	0.34	0.77	0.97	0.26	0.62	0.88
chr4:129278651:129278869|129278777:+@chr4:129279114:129279205:+	n/a	n/a	n/a	2	-0.161616	3.22148	0.72	0.79	0.06	0.671001	0.59	0.82	0.97	0.46	0.78	0.96	0.27	0.57	0.92	0.39	0.73	0.98	0.38	0.73	0.93	0.68	0.92	1	0.63	0.9	0.99	0.74	0.91	1	0.25	0.53	0.93	0.24	0.47	0.71	0.5	0.74	0.93	0.52	0.81	0.99	0.55	0.84	0.99
chr10:79808258:79808864:-@chr10:79808158|79808161:79808067:-	ENSMUSG00000043822	n/a	n/a	n/a	n/a	n/a	n/a	n/a	n/a	n/a	0	0.03	0.11	0	0.06	0.15	0	0.04	0.13	0	0.05	0.13	0.01	0.16	0.44	0.01	0.07	0.19	0	0.03	0.1	0	0.01	0.03	0	0.07	0.21	0	0.02	0.08	0	0.03	0.08	0.01	0.1	0.26	0	0.06	0.17
chr3:103613327:103613980:+@chr3:103616008:103616232:+@chr3:103616700:103616830:+	ENSMUSG00000032952	Ap4b1	adaptor-related protein complex AP-4	n/a	n/a	n/a	n/a	n/a	n/a	n/a	0.77	0.92	1	0.67	0.87	0.98	0.67	0.88	1	0.65	0.86	0.98	0.38	0.71	0.99	0.61	0.87	0.99	0.76	0.91	0.99	0.78	0.94	1	0.63	0.88	0.99	0.65	0.88	0.98	0.49	0.76	0.97	0.78	0.92	0.98	0.84	0.95	1
chr19:42189168:42190508:+@chr19:42190997:42191056:+@chr19:42194283:42196708:+	ENSMUSG00000025178	Pi4k2a	phosphatidylinositol 4-kinase type 2 alpha	2	-0.535354	7.8268	0.88	0.94	0.06	0.323932	0.77	0.92	0.99	0.65	0.87	1	0.67	0.86	1	0.68	0.88	0.99	0.55	0.87	0.98	0.8	0.94	1	0.93	0.98	1	0.64	0.85	0.98	0.1	0.37	0.73	0.48	0.76	0.95	0.59	0.86	0.99	0.73	0.9	0.99	0.34	0.74	0.98
chr11:75154530:75154608:-@chr11:75153792:75153900:-@chr11:75142175:75142263:-	ENSMUSG00000000751	Rpa1	replication protein A1	-15	1.51515	11.657	0.9	0.78	-0.12	-1.41676	0.73	0.91	1	0.81	0.93	0.99	0.68	0.87	0.97	0.75	0.9	0.99	0.84	0.96	1	0.79	0.93	1	0.68	0.87	0.98	0.51	0.69	0.88	0.57	0.79	0.96	0.84	0.94	1	0.66	0.87	0.98	0.83	0.94	1	0.65	0.9	0.99
chr14:121959617:121959622:-@chr14:121959147:121959182:-@chr14:121958209:121958355:-	ENSMUSG00000025558	Dock9,mKIAA1058	clone:B230309H04 product:TRG PROTEIN (FRAGMENT) homolog [Rattus norvegicus], RIKEN full-length enriched library, full insert sequence.,Mus musculus adult male corpora quadrigemina cDNA,Adult male medulla oblongata cDNA, clone:6330522O04 product:Dedicator of cytokinesis protein 9 (Cdc42 guanine nucleotide exchange factor zizimin 1) homolog (Fragment).	n/a	n/a	n/a	n/a	n/a	n/a	n/a	0.02	0.12	0.34	0.01	0.11	0.32	0.02	0.14	0.54	0.01	0.09	0.36	0.01	0.16	0.57	0	0.08	0.36	0.01	0.07	0.2	0.01	0.11	0.45	0	0.09	0.28	0.01	0.13	0.49	0.01	0.07	0.23	0	0.11	0.38	0.01	0.1	0.34
chr17:30713091:30713395:-@chr17:30667099:30667310:-@chr17:30664247:30664610:-	ENSMUSG00000062202	Btbd9	BTB (POZ) domain containing 9	n/a	n/a	n/a	n/a	n/a	n/a	n/a	0.65	0.87	0.99	0.65	0.89	1	0.77	0.9	0.99	0.71	0.88	0.99	0.25	0.62	0.94	0.76	0.92	0.99	0.89	0.96	1	0.8	0.93	1	0.68	0.87	0.99	0.77	0.92	0.99	0.69	0.88	0.98	0.33	0.72	0.97	0.46	0.77	0.96
chr14:52530460:52530417|52530355:-@chr14:52529990:52530110:-	ENSMUSG00000004558	Ndrg2	N-myc downstream regulated gene 2	n/a	n/a	n/a	n/a	n/a	n/a	n/a	0.99	1	1	1	1	1	0.99	1	1	0.99	1	1	0.98	1	1	0.99	1	1	1	1	1	0.99	1	1	0.99	1	1	1	1	1	0.99	1	1	0.98	0.99	1	0.98	0.99	1
chr2:29965725:29965901:-@chr2:29963741:29963855:-	n/a	n/a	n/a	15	-2.53535	18.5915	0.02	0.07	0.05	0.943194	0.01	0.02	0.04	0	0.01	0.02	0.01	0.02	0.03	0.04	0.07	0.11	0	0.01	0.03	0	0.01	0.02	0.01	0.02	0.03	0.01	0.03	0.05	0.04	0.07	0.1	0.04	0.06	0.09	0.01	0.01	0.03	0	0.01	0.02	0	0.01	0.02
chrX:45976755:45977005:+@chrX:45977139:45977383:+@chrX:45982429:45982522:+	ENSMUSG00000031105	Slc25a14	,solute carrier family 25 (mitochondrial carrier	n/a	n/a	n/a	n/a	n/a	n/a	n/a	n/a	n/a	n/a	0.16	0.57	0.98	n/a	n/a	n/a	0.73	0.92	0.99	n/a	n/a	n/a	0.5	0.86	1	n/a	n/a	n/a	0.41	0.82	0.99	0.17	0.51	0.87	0.21	0.63	0.97	n/a	n/a	n/a	n/a	n/a	n/a	n/a	n/a	n/a
chr3:37332060:37332205|37332189:+@chr3:37332561:37332617:+	ENSMUSG00000027722	Spata5	spermatogenesis associated 5	n/a	n/a	n/a	n/a	n/a	n/a	n/a	n/a	n/a	n/a	n/a	n/a	n/a	n/a	n/a	n/a	n/a	n/a	n/a	n/a	n/a	n/a	n/a	n/a	n/a	n/a	n/a	n/a	n/a	n/a	n/a	0.01	0.27	0.68	0	0.14	0.4	n/a	n/a	n/a	0.04	0.16	0.39	n/a	n/a	n/a
chr9:78328164:78328227:-@chr9:78328048:78328128:-	n/a	n/a	n/a	n/a	n/a	n/a	n/a	n/a	n/a	n/a	0.99	1	1	0.99	1	1	0.99	1	1	0.99	1	1	0.99	1	1	0.99	1	1	1	1	1	1	1	1	1	1	1	1	1	1	0.99	1	1	0.99	1	1	0.99	1	1
chr2:120371579:120371640:-@chr2:120359247:120361415:-@chr2:120357331:120357958:-	ENSMUSG00000027288	Zfp106	SH3-domain binding protein 3	79	-2.9697	26.492	0.64	0.94	0.3	3.09413	0.65	0.68	0.71	0.59	0.63	0.66	0.59	0.61	0.64	0.67	0.7	0.74	0.72	0.76	0.81	0.84	0.88	0.92	0.95	0.98	1	0.98	0.99	1	0.58	0.61	0.63	0.66	0.69	0.72	0.64	0.68	0.72	0.83	0.87	0.91	0.93	0.97	1
chr3:95542162:95542224:-@chr3:95541935:95542036:-@chr3:95541731:95541865:-	ENSMUSG00000028108	Ecm1	extracellular matrix protein 1	n/a	n/a	n/a	n/a	n/a	n/a	n/a	0.73	0.9	0.99	0.76	0.91	0.99	0.8	0.92	0.99	0.64	0.88	0.99	0.7	0.89	0.98	0.64	0.88	0.99	0.57	0.79	0.98	0.57	0.86	0.98	0.78	0.93	0.99	0.83	0.92	0.98	0.71	0.9	0.99	0.55	0.83	0.98	0.7	0.91	0.99
chr5:48763568:48765486:+@chr5:48765612|48765623:48765777:+	ENSMUSG00000029089	4933428G09Rik	hypothetical protein LOC66768	n/a	n/a	n/a	n/a	n/a	n/a	n/a	n/a	n/a	n/a	n/a	n/a	n/a	n/a	n/a	n/a	n/a	n/a	n/a	n/a	n/a	n/a	n/a	n/a	n/a	0.02	0.22	0.54	0.01	0.08	0.21	0	0.05	0.15	0	0.04	0.17	n/a	n/a	n/a	n/a	n/a	n/a	n/a	n/a	n/a
chr10:61906311:61906143|61906127:-@chr10:61903883:61903994:-	ENSMUSG00000020079	Supv3l1	suppressor of var1	8	-0.151515	4.6912	0.13	0.34	0.2	1.73762	0.02	0.11	0.25	0.02	0.11	0.24	0.05	0.18	0.39	0	0.07	0.26	0	0.06	0.21	0.01	0.1	0.27	0.04	0.14	0.29	0.02	0.08	0.21	0.04	0.28	0.79	0.02	0.13	0.43	0.02	0.15	0.36	0.04	0.3	0.68	0.1	0.29	0.67
chr8:87391908:87391985:+@chr8:87392123:87392237:+	n/a	n/a	n/a	15	-0.545455	12.5177	0.11	0.25	0.14	1.24188	0.03	0.07	0.14	0.07	0.15	0.27	0.05	0.12	0.22	0	0.03	0.07	0.02	0.11	0.26	0.06	0.14	0.26	0.07	0.15	0.25	0.14	0.26	0.43	0.17	0.34	0.53	0.15	0.33	0.59	0.05	0.11	0.18	0.05	0.12	0.22	0.01	0.06	0.12
chr3:89549298:89549523|89549445:+@chr3:89549742:89549913:+	ENSMUSG00000027951	Adar	RNA-specific isoform 1,adenosine deaminase, RNA-specific isoform 2	5	-1.32323	6.49449	0.59	0.73	0.14	0.973631	0.23	0.52	0.87	0.21	0.59	0.95	0.32	0.65	0.95	0.36	0.67	0.95	0.19	0.49	0.79	0.32	0.7	0.94	0.34	0.66	0.93	0.33	0.56	0.82	0.21	0.52	0.79	0.19	0.44	0.71	0.48	0.75	0.95	0.03	0.18	0.51	0.27	0.67	0.98
chr7:97072074:97072225:-@chr7:97068641|97068701:97068583:-	ENSMUSG00000062797	l7Rn6	RIKEN full-length enriched library, Chr 7,Mus musculus adult male kidney cDNA, clone:0610007P06 product:CDNA FLJ10585 FIS, full insert sequence., Rinchik 6, CLONE NT2RP2003793 (SIMILAR TO HYPOTHETICAL PROTEIN) (HYPOTHETICAL 21.6 KDA PROTEIN) homolog [Homo sapiens],lethal	n/a	n/a	n/a	n/a	n/a	n/a	n/a	0.6	0.84	1	0.53	0.74	0.97	0.62	0.85	0.99	0.78	0.92	0.99	0.82	0.94	0.99	0.89	0.97	1	0.7	0.89	0.99	0.76	0.93	0.99	0.46	0.7	0.91	0.79	0.93	0.99	0.64	0.82	0.97	0.73	0.91	1	0.86	0.95	1
chr12:107308735:107309851|107308825:+@chr12:107311829:107311888:+	ENSMUSG00000021115	Vrk1	vaccinia related kinase 1 isoform b	n/a	n/a	n/a	n/a	n/a	n/a	n/a	0.03	0.08	0.17	0.04	0.09	0.18	0.04	0.13	0.34	0.04	0.11	0.23	0.04	0.14	0.34	0.02	0.06	0.14	0.01	0.03	0.06	0.03	0.07	0.13	0.02	0.04	0.08	0.09	0.18	0.33	0.04	0.08	0.13	0.04	0.09	0.17	0.12	0.28	0.57
chr6:149137128:149137258:-@chr6:149131988:149132060:-@chr6:149119355:149119572:-	ENSMUSG00000068250	AK050169	clone:A230083D09 product:hypothetical protein,Mus musculus adult male hypothalamus cDNA, RIKEN full-length enriched library	3	0.010101	1.91483	0.3	0.59	0.29	1.56145	0.02	0.31	0.84	0.03	0.37	0.89	0.02	0.22	0.77	0.19	0.53	0.95	0.08	0.49	0.86	0.44	0.83	1	0.18	0.42	0.78	0.03	0.29	0.66	0.1	0.59	0.98	0.35	0.65	0.92	0.27	0.75	0.99	0.21	0.63	0.96	0.24	0.65	0.91
chr3:83937940:83938088:-@chr3:83920349:83920423:-@chr3:83908857:83908971:-	ENSMUSG00000033752	Mnd1	GAJ protein	n/a	n/a	n/a	n/a	n/a	n/a	n/a	n/a	n/a	n/a	n/a	n/a	n/a	n/a	n/a	n/a	n/a	n/a	n/a	n/a	n/a	n/a	n/a	n/a	n/a	0.26	0.63	0.97	0.46	0.79	0.99	0.16	0.55	0.96	0.46	0.76	0.97	n/a	n/a	n/a	n/a	n/a	n/a	n/a	n/a	n/a
chr4:134899779:134899894:-@chr4:134898398|134898488:134898285:-	ENSMUSG00000028809	Srrm1	serine/arginine repetitive matrix 1,Mus musculus plenty-of-prolines-101 mRNA, complete cds.	n/a	n/a	n/a	n/a	n/a	n/a	n/a	0.88	0.96	1	0.87	0.96	1	0.84	0.94	1	0.94	0.98	1	0.82	0.94	0.99	0.89	0.96	0.99	0.96	0.99	1	0.9	0.97	1	0.7	0.89	0.99	0.79	0.91	0.99	0.9	0.97	1	0.87	0.95	0.99	0.79	0.93	1
chr7:135078024:135078141:-@chr7:135077081:135077346:-@chr7:135076885:135077006:-	ENSMUSG00000070371	Prss36	protease, RIKEN full-length enriched library, 36, full insert sequence.,Mus musculus ES cells cDNA, clone:C330007D15 product:hypothetical protein, serine	n/a	n/a	n/a	n/a	n/a	n/a	n/a	0.61	0.84	0.99	0.47	0.73	0.96	0.44	0.73	0.98	0.58	0.83	0.98	0.51	0.79	0.96	0.73	0.9	0.99	0.36	0.64	0.91	0.35	0.56	0.81	0.35	0.66	0.93	0.38	0.66	0.94	0.67	0.88	0.98	0.2	0.49	0.81	0.3	0.71	0.98
chr10:62028785:62028869:-@chr10:62026099|62026256:62025984:-	ENSMUSG00000036955	2510003E04Rik,mKIAA1279	clone:0710007C18 product:RIKEN cDNA 0710007C18 gene,Mus musculus adult male brain cDNA,hypothetical protein LOC72320, full insert sequence., RIKEN full-length enriched library	n/a	n/a	n/a	n/a	n/a	n/a	n/a	0	0.02	0.05	0.02	0.04	0.09	0	0.01	0.04	0	0.02	0.06	0	0.02	0.06	0.01	0.02	0.05	0	0.02	0.04	0.02	0.06	0.13	0.01	0.05	0.14	0	0.02	0.06	0.02	0.06	0.13	0	0.03	0.09	0.01	0.04	0.09
chr5:33276599:33276664:+@chr5:33280170|33280197:33280353:+	ENSMUSG00000037426	Depdc5	full insert sequence., clone:A730059B08 product:KIAA0645 PROTEIN (WUGSC:H_DJ403E2.1 PROTEIN) homolog [Homo sapiens],DEP domain containing 5 isoform 1,Mus musculus 7 days neonate cerebellum cDNA, RIKEN full-length enriched library	n/a	n/a	n/a	n/a	n/a	n/a	n/a	0.06	0.26	0.53	0.03	0.2	0.47	0.15	0.44	0.76	0.11	0.52	0.95	n/a	n/a	n/a	0.03	0.28	0.92	0.01	0.15	0.46	0.25	0.67	0.97	0.14	0.49	0.8	0.01	0.12	0.37	0.05	0.33	0.71	n/a	n/a	n/a	0.02	0.34	0.89
chr17:5799488:5799993:+@chr17:5801199:5801341:+@chr17:5802713:5803242:+	n/a	n/a	n/a	n/a	n/a	n/a	n/a	n/a	n/a	n/a	n/a	n/a	n/a	n/a	n/a	n/a	n/a	n/a	n/a	n/a	n/a	n/a	n/a	n/a	n/a	n/a	n/a	n/a	n/a	n/a	n/a	n/a	n/a	n/a	n/a	n/a	n/a	n/a	n/a	n/a	n/a	n/a	n/a	n/a	n/a	n/a	n/a	n/a	n/a
chr8:35169396:35169585:-@chr8:35168040:35168152:-@chr8:35160243:35160348:-	ENSMUSG00000031516	Dctn6	dynactin 6	-4	-0.0808081	5.36671	0.1	0.04	-0.06	-0.730279	0.04	0.12	0.25	0.03	0.1	0.22	0.03	0.08	0.16	0.08	0.16	0.26	0.03	0.1	0.21	0.01	0.03	0.07	0	0.02	0.05	0.03	0.06	0.11	0.02	0.05	0.1	0.01	0.03	0.06	0.02	0.09	0.21	0.05	0.15	0.29	0.01	0.12	0.38
chr8:127678908:127679010:+@chr8:127688893:127689081:+@chr8:127741997:127742057:+	ENSMUSG00000043051	Disc1	disrupted in schizophrenia 1 isoform 1,disrupted in schizophrenia 1 isoform 2	n/a	n/a	n/a	n/a	n/a	n/a	n/a	0.08	0.5	0.86	0.17	0.62	0.94	0.08	0.45	0.87	n/a	n/a	n/a	0.35	0.67	0.96	n/a	n/a	n/a	0.44	0.83	0.99	n/a	n/a	n/a	0.15	0.59	0.97	0.03	0.35	0.85	0.17	0.57	0.92	n/a	n/a	n/a	0.13	0.5	0.89
chr15:31515050:31515192:+@chr15:31517923|31517986:31518014:+	ENSMUSG00000022235	Cmbl	carboxymethylenebutenolidase-like (Pseudomonas)	n/a	n/a	n/a	n/a	n/a	n/a	n/a	0.79	0.93	0.99	0.66	0.88	0.99	0.76	0.91	1	0.76	0.89	0.99	0.8	0.94	1	0.88	0.96	0.99	0.86	0.96	0.99	0.75	0.91	0.99	0.91	0.97	1	0.95	0.98	1	0.75	0.9	0.98	0.54	0.8	0.99	0.71	0.9	0.99
chr15:76455564:76455635:-@chr15:76455050|76455148:76455022:-	ENSMUSG00000062381	Vps28	18-day embryo whole body cDNA,vacuolar protein sorting 28, clone:1110008G16 product:VACUOLAR SORTING PROTEIN 28 homolog., RIKEN full-length enriched library	n/a	n/a	n/a	n/a	n/a	n/a	n/a	0	0.01	0.02	0.01	0.02	0.05	0	0.01	0.02	0	0.01	0.03	0	0.02	0.06	0.01	0.04	0.09	0	0.02	0.05	0	0.01	0.03	0.01	0.06	0.16	0	0.02	0.05	0	0.01	0.02	0.01	0.04	0.14	0	0.05	0.17
chr7:52808615:52808664:+@chr7:52808939:52809051:+@chr7:52809135:52809599:+	ENSMUSG00000040428	Plekha4	pleckstrin homology domain-containing, RIKEN full-length enriched library, family A, clone:2410005C22 product:inferred: phosphoinositol 3-phosphate binding protein-1 {Homo sapiens}, full insert sequence.,Mus musculus ES cells cDNA	n/a	n/a	n/a	n/a	n/a	n/a	n/a	0.31	0.66	0.88	n/a	n/a	n/a	n/a	n/a	n/a	n/a	n/a	n/a	n/a	n/a	n/a	0.27	0.62	0.88	n/a	n/a	n/a	0.13	0.42	0.8	n/a	n/a	n/a	n/a	n/a	n/a	0.5	0.83	0.98	n/a	n/a	n/a	n/a	n/a	n/a
chr17:46841782:46842060:-@chr17:46837095|46837098:46837018:-	ENSMUSG00000059409	Ppp2r5d	Mus musculus mRNA for protein phosphatase 2A B56delta regulatory subunit, complete cds.,delta isoform of regulatory subunit B56, protein	-2	-0.010101	1.53409	0.31	0.17	-0.14	-1.29712	0.03	0.18	0.52	0.04	0.32	0.68	0.08	0.42	0.81	0.04	0.27	0.56	0.01	0.14	0.39	0.03	0.27	0.67	0.08	0.34	0.66	0.23	0.51	0.79	0.06	0.31	0.62	0.07	0.3	0.65	0.06	0.17	0.33	0.04	0.29	0.68	0.02	0.19	0.53
chr5:44106993:44107084:+@chr5:44108176:44108190:+@chr5:44109792:44109959:+	ENSMUSG00000039765	5730509K17Rik	hypothetical protein LOC231214, clone:9930108M23 product:hypothetical C2 domain containing protein,Mus musculus adult female vagina cDNA, full insert sequence., RIKEN full-length enriched library	n/a	n/a	n/a	n/a	n/a	n/a	n/a	0.05	0.27	0.68	0.05	0.42	0.94	0.01	0.37	0.84	0.01	0.12	0.33	0.01	0.28	0.66	0.04	0.36	0.84	0.01	0.14	0.4	0	0.11	0.37	0.01	0.22	0.72	0	0.37	0.87	0.2	0.57	0.91	n/a	n/a	n/a	n/a	n/a	n/a
chr7:133518581:133518717:-@chr7:133517715:133517793:-@chr7:133517436:133517487:-	ENSMUSG00000030741	Spns1	spinster	4	-0.282828	3.20681	0.2	0.39	0.19	1.33554	0.07	0.22	0.44	0.02	0.12	0.35	0.06	0.26	0.55	0.02	0.15	0.37	0.06	0.37	0.88	0.08	0.2	0.41	0.12	0.36	0.64	0.1	0.29	0.57	0.15	0.39	0.94	0.2	0.51	0.92	0.09	0.28	0.59	0.05	0.26	0.65	0.05	0.26	0.66
chr8:87214288:87214471:+@chr8:87214701|87214710:87214846:+	ENSMUSG00000001909	AK040715,Trmt1	RIKEN full-length enriched library, clone:6720477L24 product:weakly similar to PROBABLE N2,TRM1 tRNA methyltransferase 1 homolog,N2-DIMETHYLGUANOSINE TRNA METHYLTRANSFERASE (EC 2.1.1.32) (TRNA(GUANINE-26,2)G26)DIMETHYLTRANSFERASE) [Homo sapiens], full insert sequence.,Mus musculus 12 days embryo male wolffian duct includes surrounding region cDNA,2-DIMETHYLGUANOSINE-26 METHYLTRANSFERASE) (TRNA(M(…	13	1.0202	10.9378	0.32	0.31	0	1.09526	0.03	0.22	0.6	0.09	0.29	0.54	0.2	0.44	0.73	0.03	0.12	0.29	0.03	0.23	0.61	0.17	0.33	0.52	0.07	0.2	0.4	0.02	0.11	0.29	0.14	0.34	0.56	0.01	0.09	0.27	0	0.1	0.27	0.01	0.16	0.56	0.12	0.59	0.91
chr7:144602323:144602446:-@chr7:144568616:144568800:-@chr7:144567251:144568034:-	n/a	n/a	n/a	1	-0.030303	0.926103	0.17	0.19	0.02	1.11251	0.02	0.14	0.36	0.03	0.16	0.4	0.05	0.22	0.51	0.01	0.13	0.32	0	0.13	0.57	0.06	0.18	0.44	0.04	0.11	0.27	0.11	0.29	0.55	0.05	0.24	0.68	0.05	0.2	0.52	0.04	0.26	0.63	0	0.12	0.35	0.01	0.18	0.64
chr12:102016777:102017520:+@chr12:102025826:102025882:+@chr12:102067809:102067935:+	ENSMUSG00000021185	n/a	n/a	12	1.26263	6.61279	0.18	0.45	0.28	1.62373	0.09	0.25	0.51	0.06	0.19	0.39	0.02	0.09	0.24	0.01	0.08	0.23	0.06	0.17	0.37	0.01	0.17	0.59	0.09	0.22	0.42	0.02	0.12	0.35	0.11	0.33	0.63	0.05	0.14	0.26	0.07	0.2	0.41	0.02	0.12	0.33	0.13	0.37	0.69
chr5:136673650:136673728:-@chr5:136670948:136671000:-@chr5:136670163:136670267:-	ENSMUSG00000039737	Prkrip1	Prkr interacting protein 1 (IL11 inducible)	4	0.0909091	3.9366	0.1	0.22	0.11	0.993013	0.01	0.09	0.24	0	0.08	0.22	0.01	0.14	0.42	0.01	0.08	0.25	0.05	0.33	0.88	0.01	0.12	0.35	0.01	0.06	0.19	0	0.06	0.22	0.05	0.3	0.7	0.01	0.11	0.33	0.11	0.27	0.51	0.02	0.13	0.34	0.01	0.13	0.4
chr6:54878029:54878158:-@chr6:54876517:54876747:-@chr6:54873942:54875003:-	n/a	n/a	n/a	n/a	n/a	n/a	n/a	n/a	n/a	n/a	0.04	0.09	0.17	0.01	0.05	0.1	0.01	0.04	0.09	0.01	0.04	0.09	0.02	0.06	0.13	0.02	0.06	0.12	0.01	0.05	0.13	0.01	0.07	0.14	0.01	0.03	0.06	0.02	0.06	0.1	0	0.03	0.07	0.01	0.07	0.17	0.01	0.04	0.12
chr15:76173952:76174122:+@chr15:76174710|76174732:76174928:+	ENSMUSG00000022551	Cyc1	cytochrome c-1	n/a	n/a	n/a	n/a	n/a	n/a	n/a	0.01	0.02	0.03	0.01	0.02	0.03	0.01	0.02	0.03	0.01	0.02	0.04	0	0.02	0.06	0.01	0.03	0.05	0.02	0.03	0.05	0.02	0.03	0.05	0.03	0.05	0.08	0.01	0.02	0.03	0.01	0.02	0.03	0.01	0.02	0.04	0.01	0.03	0.06
chr14:21544042:21543970|21543933:-@chr14:21543683:21543785:-	ENSMUSG00000039308	Ndst2	N-deacetylase/N-sulfotransferase (heparan	n/a	n/a	n/a	n/a	n/a	n/a	n/a	0.31	0.69	1	0.72	0.89	1	0.58	0.86	0.99	0.75	0.92	0.99	0.24	0.62	0.99	0.23	0.64	0.91	0.33	0.68	0.94	0.15	0.47	0.84	0.52	0.84	0.98	0.21	0.66	0.97	0.33	0.7	0.92	0.53	0.82	0.99	n/a	n/a	n/a
chr19:42007338:42008155:+@chr19:42009228|42009330:42009373:+	ENSMUSG00000025157	Zdhhc16	zinc finger, complete cds.,Mus musculus Abl-philin 2 mRNA, DHHC domain containing 16	n/a	n/a	n/a	n/a	n/a	n/a	n/a	0.82	0.94	0.99	0.77	0.93	0.99	0.73	0.89	0.99	0.77	0.92	0.99	0.72	0.92	1	0.58	0.89	1	0.62	0.91	0.99	0.86	0.96	1	0.85	0.96	1	0.9	0.97	1	0.78	0.92	0.99	0.65	0.86	0.97	0.26	0.75	0.99
chr5:77334448:77334540:-@chr5:77333984:77334037:-@chr5:77333234:77333405:-	n/a	n/a	n/a	n/a	n/a	n/a	n/a	n/a	n/a	n/a	0.37	0.7	0.94	n/a	n/a	n/a	n/a	n/a	n/a	n/a	n/a	n/a	n/a	n/a	n/a	n/a	n/a	n/a	0.1	0.42	0.81	n/a	n/a	n/a	0.3	0.71	0.96	0.59	0.86	0.99	n/a	n/a	n/a	n/a	n/a	n/a	n/a	n/a	n/a
chr14:32978974:32979008:+@chr14:32979422:32979456:+@chr14:32983934:32984088:+	ENSMUSG00000056234	Rfg,Ncoa4	Mus musculus RFG (Rfg) mRNA, complete cds.,nuclear receptor coactivator 4	n/a	n/a	n/a	n/a	n/a	n/a	n/a	0.01	0.09	0.29	0.01	0.07	0.24	0.02	0.14	0.56	0.01	0.1	0.41	0	0.06	0.18	0.01	0.12	0.32	0	0.09	0.35	0	0.03	0.1	0	0.03	0.12	0	0.04	0.14	0.01	0.11	0.36	0.06	0.34	0.81	0.07	0.32	0.78
chr13:36433707:36433966:+@chr13:36501948:36502099:+@chr13:36629170:36629463:+	ENSMUSG00000021420	Fars2	phenylalanine-tRNA synthetase 2 (mitochondrial)	n/a	n/a	n/a	n/a	n/a	n/a	n/a	0.92	0.98	1	0.96	0.99	1	0.95	0.98	1	0.93	0.97	1	0.91	0.97	1	0.9	0.97	1	0.92	0.98	1	0.96	0.99	1	0.97	0.99	1	0.97	0.99	1	0.9	0.97	1	0.88	0.96	1	0.89	0.96	1
chr12:111723947:111724162:+@chr12:111760701|111760832:111760900:+	ENSMUSG00000017843	PP2A B56 gamma 3,Ppp2r5c	gamma isoform of regulatory subunit B56,Mus musculus PP2A B56 gamma 3 mRNA for protein phosphatase 2A B56 regulatory subunit gamma 3 isoform, protein, complete cds.	n/a	n/a	n/a	n/a	n/a	n/a	n/a	0.96	0.99	1	0.94	0.98	1	0.94	0.98	1	0.92	0.97	1	0.93	0.98	1	0.9	0.97	1	0.95	0.99	1	0.95	0.99	1	0.93	0.98	1	0.95	0.98	1	0.93	0.98	1	0.95	0.98	1	0.9	0.97	1
chr6:97153468:97153588:-@chr6:97151911:97151991:-@chr6:97148581:97149315:-	ENSMUSG00000030061	Ube1c	ubiquitin-activating enzyme E1C	3	0.131313	5.34402	0.95	0.93	-0.02	0.536804	0.88	0.96	0.99	0.8	0.93	0.99	0.82	0.95	1	0.64	0.85	0.98	0.67	0.88	0.99	0.69	0.87	0.99	0.63	0.78	0.9	0.75	0.88	0.96	0.65	0.76	0.84	0.54	0.66	0.78	0.63	0.81	0.94	0.73	0.86	0.94	0.6	0.87	0.99
chr11:6446890:6447032:+@chr11:6469967:6470140:+@chr11:6484523:6484606:+	ENSMUSG00000000378	AK040177,Ccm2	Mus musculus 0 day neonate thymus cDNA, clone:A430073G23 product:unclassifiable, full insert sequence.,cerebral cavernous malformation 2 homolog, RIKEN full-length enriched library	n/a	n/a	n/a	n/a	n/a	n/a	n/a	0.79	0.9	0.97	0.73	0.85	0.94	0.77	0.9	0.98	0.78	0.9	0.97	0.79	0.91	0.98	0.8	0.94	1	0.87	0.95	0.99	0.88	0.92	0.96	0.81	0.89	0.94	0.74	0.85	0.93	0.85	0.94	0.99	0.84	0.95	1	0.85	0.94	0.99
chr6:124997497:124997605:+@chr6:124997811:124997958:+	n/a	n/a	n/a	22	1.25253	13.8712	0.09	0.23	0.14	1.49572	0.05	0.1	0.16	0.04	0.08	0.14	0.04	0.09	0.15	0.09	0.15	0.23	0.09	0.17	0.28	0.06	0.12	0.2	0.06	0.11	0.16	0.08	0.12	0.17	0.04	0.07	0.11	0.01	0.02	0.03	0.02	0.04	0.09	0.06	0.15	0.27	0.03	0.07	0.14
chr11:120573017:120573281:-@chr11:120572790|120572815:120572704:-	n/a	n/a	n/a	n/a	n/a	n/a	n/a	n/a	n/a	n/a	0.13	0.54	0.96	0.17	0.58	0.95	0.02	0.31	0.77	0.01	0.28	0.82	0.01	0.33	0.81	0.03	0.26	0.69	0.15	0.5	0.93	0.09	0.41	0.94	0.03	0.27	0.71	0.19	0.5	0.83	0.17	0.57	0.96	0.01	0.47	0.91	0.08	0.48	0.96
chr2:131105893:131106146|131106090:+@chr2:131108328:131108504:+	ENSMUSG00000037514	Pank2	full insert sequence., RIKEN full-length enriched library, clone:4933409I19 product:CYTOCHROME C OXIDASE POLYPEPTIDE I (EC 1.9.3.1) homolog [Homo sapiens],Mus musculus adult male testis cDNA,pantothenate kinase 2	18	0.909091	9.30417	0.52	0.76	0.25	1.83691	0.15	0.53	0.95	0.32	0.75	0.97	0.04	0.27	0.6	0.52	0.79	0.97	0.23	0.63	0.97	0.16	0.47	0.81	0.7	0.89	0.99	0.8	0.92	0.98	0.59	0.86	0.99	0.6	0.86	0.99	0.46	0.79	0.99	0.7	0.92	1	0.64	0.89	0.99
chr18:45996632:45996737:-@chr18:45861522:45861576:-@chr18:45843141:45845212:-	n/a	n/a	n/a	n/a	n/a	n/a	n/a	n/a	n/a	n/a	0.15	0.56	0.99	0.07	0.51	0.94	0.07	0.35	0.81	0.03	0.55	0.99	0.07	0.48	0.95	0.04	0.46	0.95	0.1	0.44	0.86	0.05	0.5	0.92	0.05	0.47	0.97	0.04	0.41	0.95	0.05	0.53	0.9	0.01	0.39	0.92	0.1	0.48	0.97
chr9:107790403:107790733:+@chr9:107799796:107799875:+@chr9:107801003:107801142:+	ENSMUSG00000032583	Mon1a	MON1 homolog A,Mon1a protein.	n/a	n/a	n/a	n/a	n/a	n/a	n/a	0	0.16	0.64	0.02	0.22	0.63	0.01	0.14	0.35	0	0.08	0.25	0.04	0.4	0.86	0.01	0.12	0.43	0	0.22	0.64	0.03	0.18	0.41	0.13	0.5	0.9	0.04	0.21	0.54	0.01	0.12	0.33	0.02	0.19	0.6	0.14	0.31	0.56
chr16:32677980:32678071:+@chr16:32678755:32678799:+@chr16:32679545:32680893:+	ENSMUSG00000022791	Tnk2	2,tyrosine kinase, non-receptor	7	-1.05051	4.96935	0.51	0.49	-0.02	1.62003	0.13	0.41	0.74	0.1	0.4	0.79	0.27	0.72	0.99	0.09	0.31	0.57	0.34	0.67	0.92	0.02	0.21	0.56	0.41	0.72	0.95	0.05	0.24	0.53	0.07	0.38	0.77	0.01	0.26	0.68	0.3	0.68	0.96	0.09	0.42	0.83	0.23	0.63	0.93
chr12:8704890:8704965:+@chr12:8705870:8705994:+@chr12:8712739:8712900:+	n/a	n/a	n/a	-32	-3.25253	14.9439	0.35	0.18	-0.17	-1.92369	0.22	0.37	0.55	0.2	0.33	0.5	0.19	0.36	0.65	0.15	0.3	0.48	0.35	0.52	0.7	0.19	0.28	0.41	0.37	0.47	0.58	0.13	0.18	0.23	0.51	0.6	0.69	0.41	0.47	0.54	0.3	0.43	0.58	0.23	0.35	0.5	0.3	0.41	0.52
chr11:105805425:105805801:-@chr11:105801414:105801692:-@chr11:105798943:105799154:-	ENSMUSG00000019590	Cyb561	cytochrome b-561	2	1.34343	7.70434	0.51	0.49	-0.02	0.0852203	0.26	0.55	0.87	0.16	0.36	0.63	0.32	0.62	0.92	0.26	0.59	0.93	0.01	0.21	0.56	0.19	0.53	0.9	0.3	0.53	0.8	0.61	0.8	0.94	0.62	0.84	0.97	0.61	0.76	0.89	0.3	0.54	0.87	0.34	0.64	0.93	0.52	0.78	0.97
chr13:54629665:54629912|54629897:+@chr13:54630515:54630584:+	n/a	na/a	n/a	n/a	n/a	n/a	n/a	n/a	n/a	n/a	n/a	n/a	n/a	n/a	n/a	n/a	n/a	n/a	n/a	n/a	n/a	n/a	n/a	n/a	n/a	n/a	n/a	n/a	n/a	n/a	n/a	n/a	n/a	n/a	n/a	n/a	n/a	n/a	n/a	n/a	n/a	n/a	n/a	n/a	n/a	n/a	n/a	n/a	n/a
chr7:52409672:52409790:+@chr7:52411663|52411676:52411769:+	ENSMUSG00000003423	Pih1d1	NOP17	2	0.0707071	1.53907	0.25	0.39	0.14	1.25354	0.01	0.16	0.45	0.02	0.2	0.52	0.1	0.39	0.7	0.01	0.16	0.54	0.01	0.27	0.72	0.02	0.31	0.79	0	0.07	0.22	0.01	0.07	0.22	0.01	0.2	0.55	0.01	0.16	0.68	0.01	0.15	0.44	0.02	0.27	0.91	0.07	0.25	0.59
chr9:21043520:21043776:-@chr9:21041515:21042200:-	n/a	n/a	n/a	79	0.646465	25.431	0.12	0.38	0.26	3.08103	0.09	0.13	0.17	0.08	0.11	0.15	0.09	0.12	0.15	0.08	0.11	0.15	0.04	0.07	0.12	0.05	0.08	0.11	0.06	0.08	0.11	0.18	0.23	0.27	0.14	0.19	0.25	0.18	0.23	0.28	0.09	0.12	0.16	0.1	0.15	0.21	0.1	0.15	0.21
chr16:20298204:20298399:-@chr16:20297799|20297806:20297666:-	ENSMUSG00000033918	Parl	RIKEN full-length enriched library,Mus musculus bone marrow macrophage cDNA, rhomboid-like, full insert sequence.,presenilin associated, clone:I830019F12 product:Presenilins associated rhomboid-like protein homolog [Homo sapiens]	n/a	n/a	n/a	n/a	n/a	n/a	n/a	0.78	0.94	0.99	0.81	0.95	1	0.76	0.93	0.99	0.7	0.86	0.98	0.56	0.84	0.99	0.51	0.86	0.99	0.84	0.94	0.99	0.85	0.95	1	0.66	0.89	1	0.71	0.9	0.99	0.76	0.91	0.99	0.69	0.88	1	0.69	0.89	1
chr4:137810188:137810268:+@chr4:137810613:137810687:+@chr4:137811467:137811613:+	ENSMUSG00000045349	Sh2d5	SH2 domain containing 5	n/a	n/a	n/a	n/a	n/a	n/a	n/a	n/a	n/a	n/a	n/a	n/a	n/a	n/a	n/a	n/a	n/a	n/a	n/a	n/a	n/a	n/a	n/a	n/a	n/a	n/a	n/a	n/a	n/a	n/a	n/a	n/a	n/a	n/a	n/a	n/a	n/a	n/a	n/a	n/a	n/a	n/a	n/a	n/a	n/a	n/a
chr1:140951118:140951198:+@chr1:140955644:140955703:+@chr1:140956852:140956905:+	ENSMUSG00000056268	Dennd1b	DENN/MADD domain containing 1B isoform 2	n/a	n/a	n/a	n/a	n/a	n/a	n/a	n/a	n/a	n/a	n/a	n/a	n/a	n/a	n/a	n/a	n/a	n/a	n/a	n/a	n/a	n/a	0.01	0.15	0.48	0.08	0.28	0.58	0.06	0.29	0.63	0	0.27	0.73	0.02	0.21	0.68	n/a	n/a	n/a	n/a	n/a	n/a	n/a	n/a	n/a
chr19:6067669:6067856:-@chr19:6067121:6067319:-@chr19:6066146:6067022:-	n/a	n/a	n/a	n/a	n/a	n/a	n/a	n/a	n/a	n/a	0.29	0.62	0.97	0.43	0.79	0.99	0.19	0.58	0.92	0.4	0.73	0.96	0.08	0.54	0.93	0.11	0.47	0.9	0.3	0.64	0.9	0.57	0.8	0.97	0.14	0.4	0.76	0.03	0.17	0.43	0.51	0.82	0.98	0.44	0.76	0.98	n/a	n/a	n/a
chr1:123358464:123358556:+@chr1:123358810|123358813:123358860:+	ENSMUSG00000026339	Ccdc93	coiled-coil domain containing 93 isoform a	n/a	n/a	n/a	n/a	n/a	n/a	n/a	0.23	0.64	0.9	0.26	0.64	0.94	0.39	0.78	0.98	0.48	0.83	0.98	n/a	n/a	n/a	n/a	n/a	n/a	0.64	0.9	0.99	0.61	0.87	0.99	0.54	0.8	0.98	0.73	0.92	1	0.18	0.56	0.85	0.28	0.73	0.98	0.3	0.68	0.92
chr11:50197333:50197422|50197392:+@chr11:50198146:50198238:+	ENSMUSG00000007850	Hnrph1	clone:D930007N12 product:heterogeneous nuclear ribonucleoprotein H1, full insert sequence.,heterogeneous nuclear ribonucleoprotein H1,Mus musculus 15 days embryo head cDNA, RIKEN full-length enriched library	-37	0.808081	15.8997	0.92	0.83	-0.09	-2.37791	0.91	0.97	0.99	0.78	0.9	0.98	0.77	0.88	0.98	0.91	0.97	1	0.87	0.95	0.99	0.92	0.97	1	0.94	0.97	0.99	0.85	0.93	0.98	0.97	0.99	1	0.95	0.99	1	0.83	0.9	0.96	0.91	0.96	0.99	0.96	0.99	1
chr7:138527439:138527514:+@chr7:138528014|138528025:138528107:+	ENSMUSG00000063179	Pstk	full insert sequence., clone:5730458D16 product:hypothetical P-loop containing nucleotide triphosphate hydrolases structure containing protein,Mus musculus 8 days embryo whole body cDNA,phosphoseryl-tRNA kinase, RIKEN full-length enriched library	-1	0.151515	0.868804	0.78	0.82	0.05	-1.3254	0.59	0.8	0.97	0.38	0.73	0.99	0.51	0.8	0.99	0.58	0.83	0.97	0.24	0.78	0.99	0.72	0.92	0.99	0.82	0.94	0.99	0.82	0.94	0.99	0.76	0.93	0.99	0.94	0.98	1	0.5	0.79	0.98	0.43	0.76	0.98	0.54	0.82	0.97
chr7:28300270:28300466:+@chr7:28301059:28305060:+	n/a	n/a	n/a	n/a	n/a	n/a	n/a	n/a	n/a	n/a	0.01	0.14	0.41	0.12	0.46	0.84	0.02	0.22	0.65	0.14	0.43	0.82	0.05	0.43	0.93	n/a	n/a	n/a	0.02	0.14	0.55	0	0.1	0.34	0.01	0.16	0.42	0.1	0.37	0.7	0.02	0.18	0.7	0.04	0.3	0.73	0.02	0.31	0.94
chr5:122229427:122229605:+@chr5:122231342:122231551:+@chr5:122233866:122234052:+	ENSMUSG00000042605	Atxn2	ataxin 2	-15	0.474747	11.1955	0.95	0.78	-0.17	-1.38222	0.87	0.96	1	0.8	0.94	0.99	0.88	0.95	0.99	0.54	0.74	0.94	0.67	0.84	0.95	0.86	0.96	1	0.84	0.94	0.99	0.95	0.99	1	0.82	0.94	0.99	0.87	0.96	1	0.88	0.96	1	0.76	0.9	0.99	0.64	0.85	0.98
chr17:46401832:46401927:-@chr17:46400759|46400762:46400638:-	ENSMUSG00000012296	Tjap1	WEAKLY SIMILAR TO TROPOMYOSIN 1,Mus musculus adult male kidney cDNA, RIKEN full-length enriched library, clone:0610041D19 product:CDNA FLJ14207 FIS, CLONE NT2RP3003185, full insert sequence.,tight junction associated protein 1, FUSION PROTEIN 33 homolog [Homo sapiens]	n/a	n/a	n/a	n/a	n/a	n/a	n/a	0.02	0.32	0.82	0.31	0.69	0.97	0.1	0.42	0.85	0.07	0.39	0.82	0.08	0.43	0.85	0.06	0.42	0.96	0	0.39	0.97	0.11	0.48	0.9	0.08	0.43	0.89	0.03	0.42	0.92	0.13	0.59	0.94	0.11	0.56	0.97	0.03	0.35	0.8
chr8:46830774:46830800:+@chr8:46831071|46831140:46831195:+	ENSMUSG00000031626	Sorbs2	sorbin and SH3 domain containing 2,12 days embryo embryonic body between diaphragm region and neck cDNA, clone:9430041O17 product:SH3- CONTAINING PROTEIN P4015 homolog., RIKEN full-length enriched library	46	-0.545455	16.1716	0.21	0.48	0.27	2.87822	0.16	0.22	0.3	0.14	0.21	0.29	0.14	0.2	0.27	0.2	0.31	0.44	0.16	0.27	0.41	0.23	0.32	0.44	0.22	0.3	0.39	0.34	0.43	0.53	0.16	0.25	0.35	0.17	0.25	0.35	0.08	0.15	0.25	0.09	0.16	0.25	0.25	0.4	0.56
chr1:87495204:87495816:-@chr1:87492537:87492684:-@chr1:87490840:87491008:-	ENSMUSG00000070034	Sp110	Sp110 nuclear body protein	n/a	n/a	n/a	n/a	n/a	n/a	n/a	0.64	0.86	0.99	0.7	0.88	0.98	0.85	0.95	0.99	0.65	0.85	0.97	0.76	0.93	0.99	0.84	0.95	0.99	0.68	0.91	0.99	0.65	0.87	1	0.71	0.9	0.99	0.73	0.9	1	0.82	0.94	1	0.83	0.94	1	n/a	n/a	n/a
chr17:15636851:15636988:+@chr17:15639926|15639929:15640092:+	ENSMUSG00000014767	n/a	TATA box binding protein	n/a	n/a	n/a	n/a	n/a	n/a	n/a	0.02	0.27	0.66	0.03	0.32	0.77	n/a	n/a	n/a	0.01	0.31	0.76	n/a	n/a	n/a	0.02	0.3	0.77	0.01	0.17	0.6	0.05	0.33	0.66	0.01	0.26	0.83	0.03	0.43	0.88	n/a	n/a	n/a	n/a	n/a	n/a	0.02	0.24	0.6
chr2:132390363:132390447:-@chr2:132384343:132384418:-@chr2:132382667:132382712:-	ENSMUSG00000027346	Prei4,Gde5	full insert sequence.,Mus musculus adult male tongue cDNA, RIKEN full-length enriched library, clone:2310004G06 product:weakly similar to KIAA1434 PROTEIN (FRAGMENT) [Homo sapiens],Putative glycerophosphodiester phosphodiesterase 5 (EC 3.1.-.-) (Preimplantation protein 4).	n/a	n/a	n/a	n/a	n/a	n/a	n/a	0.86	0.93	0.99	0.9	0.97	1	0.81	0.93	0.98	0.86	0.95	1	0.76	0.89	0.98	0.84	0.94	0.99	0.86	0.92	0.96	0.91	0.96	0.99	0.89	0.93	0.96	0.87	0.91	0.95	0.52	0.76	0.95	0.89	0.95	0.99	0.85	0.94	1
chr5:123300156:123300307:+@chr5:123311698:123311916:+@chr5:123313996:123315620:+	ENSMUSG00000029474	Rnf34	ring finger protein 34	n/a	n/a	n/a	n/a	n/a	n/a	n/a	0.94	0.98	1	0.94	0.98	1	0.92	0.98	1	0.92	0.97	1	0.87	0.96	0.99	0.94	0.98	1	0.95	0.98	1	0.97	0.99	1	0.97	0.99	1	0.96	0.99	1	0.95	0.98	1	0.87	0.96	0.99	0.9	0.97	1
chr5:8107002:8107019:-@chr5:8095073:8095180:-@chr5:8092731:8092831:-	ENSMUSG00000040537	ADAM22,Adam22	Mus musculus mRNA for ADAM22, complete cds.,a disintegrin and metalloprotease domain 22	n/a	n/a	n/a	n/a	n/a	n/a	n/a	n/a	n/a	n/a	n/a	n/a	n/a	n/a	n/a	n/a	n/a	n/a	n/a	n/a	n/a	n/a	n/a	n/a	n/a	0.07	0.37	0.79	n/a	n/a	n/a	n/a	n/a	n/a	0	0.37	0.94	n/a	n/a	n/a	n/a	n/a	n/a	n/a	n/a	n/a
chr17:80604602:80604778:-@chr17:80603962:80604421:-@chr17:80603653:80603727:-	ENSMUSG00000024097	Sfrs7	Mus musculus 12 days embryo male wolffian duct includes surrounding region cDNA, clone:6720463L11 product:SPLICING FACTOR, RIKEN full-length enriched library, ARGININE/SERINE-RICH 7 (SPLICING FACTOR 9G8) homolog [Homo sapiens],splicing factor, full insert sequence., arginine/serine-rich 7	-2	1.18182	17.0118	0.26	0.32	0.06	-0.187036	0.24	0.31	0.39	0.14	0.19	0.25	0.2	0.27	0.35	0.25	0.31	0.38	0.26	0.35	0.47	0.29	0.36	0.44	0.18	0.22	0.27	0.16	0.2	0.25	0.41	0.5	0.6	0.35	0.42	0.5	0.09	0.13	0.17	0.24	0.32	0.41	0.16	0.23	0.3
chr7:5026743:5026841|5026829:+@chr7:5027070:5027318:+	ENSMUSG00000030435	U2af2	Splicing factor U2AF 65 kDa subunit (U2 auxiliary factor 65 kDa subunit) (U2 snRNP auxiliary factor large subunit).,U2af2 protein.,U2 small nuclear ribonucleoprotein auxiliary	17	0.0606061	12.7524	0.17	0.28	0.11	1.32833	0.09	0.16	0.25	0.06	0.13	0.22	0.14	0.22	0.32	0.29	0.38	0.48	0.06	0.13	0.24	0.2	0.31	0.43	0.03	0.09	0.16	0.09	0.14	0.2	0.07	0.12	0.17	0.04	0.08	0.13	0.13	0.2	0.28	0.2	0.29	0.39	0.09	0.19	0.31
chr12:66273436:66273939:-@chr12:66262390:66263015:-@chr12:66259382:66259848:-	ENSMUSG00000047534	C79407	expressed sequence C79407	n/a	n/a	n/a	n/a	n/a	n/a	n/a	n/a	n/a	n/a	n/a	n/a	n/a	n/a	n/a	n/a	n/a	n/a	n/a	n/a	n/a	n/a	n/a	n/a	n/a	n/a	n/a	n/a	n/a	n/a	n/a	n/a	n/a	n/a	n/a	n/a	n/a	n/a	n/a	n/a	n/a	n/a	n/a	n/a	n/a	n/a
chr2:150627274:150627377|150627375:+@chr2:150631929:150632007:+	ENSMUSG00000033059	Pygb	brain glycogen phosphorylase	n/a	n/a	n/a	n/a	n/a	n/a	n/a	0	0.02	0.06	0	0.02	0.05	0	0.02	0.07	0	0.02	0.06	0	0.03	0.08	0	0.02	0.07	0	0.01	0.02	0	0.01	0.04	0	0.05	0.16	0	0.03	0.11	0	0.03	0.08	0	0.03	0.09	0	0.03	0.1
chr9:95940119:95940275|95940263:+@chr9:95945905:95946080:+	ENSMUSG00000032410	Xrn1	5'-3' exoribonuclease 1	-13	1.08081	6.90436	0.51	0.27	-0.24	-2.03941	0.16	0.5	0.85	0.11	0.5	0.88	0.22	0.52	0.85	0.01	0.27	0.74	0.38	0.79	0.99	0.07	0.43	0.88	0.02	0.16	0.47	0.45	0.7	0.9	0.16	0.4	0.7	0.05	0.19	0.42	0.04	0.39	0.83	0.02	0.2	0.6	0.08	0.3	0.68
chr13:68724055:68724140:+@chr13:68726598:68726711:+	n/a	n/a	n/a	n/a	n/a	n/a	n/a	n/a	n/a	n/a	0.08	0.2	0.55	n/a	n/a	n/a	n/a	n/a	n/a	0.1	0.24	0.52	0.04	0.14	0.34	0.07	0.15	0.27	0.05	0.09	0.16	0.03	0.05	0.09	0.08	0.15	0.27	0.04	0.07	0.12	0.04	0.14	0.29	0.04	0.12	0.29	n/a	n/a	n/a
chr5:136577114:136577559:+@chr5:136577815:136577927:+@chr5:136578105:136578297:+	ENSMUSG00000004952	Rasa4,mKIAA0538	RAS p21 protein activator 4 isoform 1,Mus musculus 13 days embryo head cDNA, full insert sequence., clone:3110056A02 product:similar to CALCIUM-PROMOTED RAS INACTIVATOR [Homo sapiens], RIKEN full-length enriched library	n/a	n/a	n/a	n/a	n/a	n/a	n/a	0.69	0.9	1	0.56	0.84	1	0.48	0.8	0.98	0.51	0.81	0.99	0.56	0.85	0.97	0.79	0.94	1	0.28	0.66	0.96	0.78	0.94	1	0.41	0.78	0.98	0.49	0.79	0.95	0.68	0.92	1	0.44	0.81	0.98	0.4	0.77	0.98
chr10:18314714:18314835:-@chr10:18310936:18312148:-@chr10:18301648:18309578:-	ENSMUSG00000019852	mKIAA1244,D10Bwg1379e	hypothetical protein LOC215821, clone:9630004D11 product:BIG3 homolog [Homo sapiens],Mus musculus 16 days neonate cerebellum cDNA, full insert sequence., RIKEN full-length enriched library	n/a	n/a	n/a	n/a	n/a	n/a	n/a	n/a	n/a	n/a	n/a	n/a	n/a	n/a	n/a	n/a	n/a	n/a	n/a	n/a	n/a	n/a	n/a	n/a	n/a	n/a	n/a	n/a	n/a	n/a	n/a	n/a	n/a	n/a	n/a	n/a	n/a	n/a	n/a	n/a	n/a	n/a	n/a	n/a	n/a	n/a
chr1:137998056:137998139:+@chr1:138001147:138001203:+@chr1:138002025:138002153:+	ENSMUSG00000026407	Cacna1s	, L type,calcium channel, voltage-dependent	n/a	n/a	n/a	n/a	n/a	n/a	n/a	0.27	0.66	0.95	0.43	0.76	0.95	0.17	0.55	0.85	0.42	0.73	0.95	0.15	0.45	0.78	0.35	0.69	0.93	0.49	0.74	0.96	0.63	0.85	0.98	0.4	0.8	0.98	0.52	0.82	0.98	n/a	n/a	n/a	n/a	n/a	n/a	0.4	0.79	1
chr4:118103101:118103160:+@chr4:118103320:118103510:+@chr4:118103668:118103748:+	ENSMUSG00000006390	Elovl1	elongation of very long chain fatty acids-like 1	n/a	n/a	n/a	n/a	n/a	n/a	n/a	0.8	0.92	0.99	0.62	0.86	0.98	0.71	0.88	0.98	0.71	0.89	0.99	0.57	0.77	0.92	0.63	0.84	0.98	0.64	0.86	0.99	0.61	0.83	0.98	0.79	0.94	1	0.88	0.96	1	0.77	0.91	0.99	0.65	0.86	0.98	0.44	0.84	0.99
chr1:136079357:136079386:+@chr1:136079810|136080074:136080278:+	ENSMUSG00000064246	Chi3l1	chitinase 3-like 1	n/a	n/a	n/a	n/a	n/a	n/a	n/a	n/a	n/a	n/a	n/a	n/a	n/a	n/a	n/a	n/a	n/a	n/a	n/a	n/a	n/a	n/a	n/a	n/a	n/a	n/a	n/a	n/a	0.01	0.08	0.4	n/a	n/a	n/a	n/a	n/a	n/a	n/a	n/a	n/a	n/a	n/a	n/a	n/a	n/a	n/a
chr8:126428452:126428516:-@chr8:126426499:126426587:-@chr8:126421022:126423410:-	ENSMUSG00000039509	Nup133	nucleoporin 133	n/a	n/a	n/a	n/a	n/a	n/a	n/a	0.6	0.84	0.98	0.61	0.87	0.98	0.59	0.83	0.98	0.79	0.93	1	0.54	0.84	0.97	0.76	0.92	0.99	0.84	0.94	1	0.67	0.89	0.99	0.67	0.87	0.98	0.63	0.9	1	0.47	0.81	1	0.69	0.86	0.98	0.69	0.91	1
chr7:73833709:73833806:-@chr7:73832770:73832844:-@chr7:73826591:73826694:-	ENSMUSG00000030509	Asb7	ankyrin repeat and SOCS box-containing protein 7	n/a	n/a	n/a	n/a	n/a	n/a	n/a	0.03	0.2	0.51	n/a	n/a	n/a	n/a	n/a	n/a	n/a	n/a	n/a	n/a	n/a	n/a	n/a	n/a	n/a	0	0.1	0.32	0.04	0.13	0.28	0.01	0.12	0.38	0.02	0.18	0.45	0.14	0.41	0.73	n/a	n/a	n/a	n/a	n/a	n/a
chr11:58136772:58136882:-@chr11:58136102:58136231:-@chr11:58132826:58133092:-	ENSMUSG00000049755	Zfp672	zinc finger protein 672	n/a	n/a	n/a	n/a	n/a	n/a	n/a	0.62	0.86	0.99	0.47	0.74	0.97	0.68	0.89	1	0.4	0.7	0.99	0.51	0.85	1	0.84	0.95	0.99	0.6	0.81	0.96	0.73	0.93	1	0.87	0.96	1	0.79	0.93	0.99	0.56	0.84	0.99	0.6	0.85	0.99	0.39	0.72	0.99
chr1:163899191:163899410:+@chr1:163900358|163900371:163903566:+	ENSMUSG00000026698	Pigc	phosphatidylinositol glycan	1	0.474747	2.5755	0.5	0.46	-0.04	0.203942	0.18	0.61	0.99	0.09	0.52	0.9	0.01	0.37	0.85	0.24	0.6	0.9	0.03	0.35	0.9	0.12	0.5	0.93	0.15	0.56	0.94	0.05	0.52	0.93	0.06	0.38	0.71	0.13	0.48	0.8	0.1	0.48	0.8	0.21	0.66	0.94	0.03	0.39	0.88
chr17:35388808:35389801:+@chr17:35389909|35389928:35390053:+	ENSMUSG00000019432	Bat1a	complete cds., RIKEN full-length enriched library, clone:F730223O22 product:HLA-B-associated transcript 1A,HLA-B-associated transcript 1A,B6-derived CD11 +ve dendritic cells cDNA, full insert sequence.,Mus musculus nuclear RNA helicase Bat1 mRNA	n/a	n/a	n/a	n/a	n/a	n/a	n/a	0.94	0.98	1	0.93	0.98	1	0.94	0.98	1	0.92	0.98	1	0.91	0.97	1	0.92	0.98	1	0.95	0.98	1	0.91	0.97	1	0.83	0.95	1	0.93	0.98	1	0.95	0.99	1	0.88	0.96	1	0.84	0.95	0.99
chrX:133274344:133275026:-@chrX:133270085:133270161:-@chrX:133267481:133269040:-	ENSMUSG00000031422	Morf4l2	mortality factor 4 like 2	-46	1.75758	18.2298	0.89	0.58	-0.31	-2.61976	0.76	0.89	0.97	0.79	0.95	1	0.63	0.84	0.99	0.66	0.83	0.94	0.55	0.83	0.97	0.83	0.94	0.99	0.82	0.92	0.99	0.5	0.67	0.83	0.79	0.9	0.98	0.86	0.95	0.99	0.57	0.72	0.9	0.7	0.86	0.97	0.69	0.88	0.98
chr10:81690336:81690276|81690190:-@chr10:81687598:81689338:-	ENSMUSG00000062931	B230315N10Rik	clone:B230315N10 product:similar to MSZF33 (FRAGMENT) [Mus musculus], full insert sequence.,Mus musculus adult male corpora quadrigemina cDNA,RIKEN cDNA 4932415D10 gene., RIKEN full-length enriched library	-4	0.383838	3.98408	0.8	0.78	-0.01	-1.10034	0.56	0.84	0.98	0.43	0.77	0.97	0.43	0.78	0.98	0.82	0.93	1	0.45	0.81	0.97	0.83	0.94	1	0.68	0.85	0.97	0.4	0.72	0.96	0.84	0.94	1	0.58	0.83	0.99	0.3	0.69	0.97	0.6	0.86	0.99	0.52	0.82	0.99
chr17:34287451:34287567:+@chr17:34287735:34287770:+@chr17:34296574:34296609:+@chr17:34296874:34297497:+	ENSMUSG00000037548	H2-DMb2	RIKEN full-length enriched library,histocompatibility 2, locus Mb2,Mus musculus NOD-derived CD11c +ve dendritic cells cDNA, class II, full insert sequence., clone:F630111I02 product:histocompatibility 2	n/a	n/a	n/a	n/a	n/a	n/a	n/a	0.08	0.5	0.89	0.33	0.75	0.96	0.05	0.56	0.96	0.02	0.47	0.97	0.28	0.73	0.98	0.28	0.77	0.98	0.05	0.45	0.9	0.43	0.73	0.94	0.13	0.5	0.92	0.19	0.68	0.97	0.21	0.63	0.99	0.04	0.39	1	0.58	0.86	0.99
chr6:6063938:6064022:-@chr6:6063750:6063752:-@chr6:6059937:6060021:-	ENSMUSG00000015112	Slc25a13	,solute carrier family 25 (mitochondrial carrier	n/a	n/a	n/a	n/a	n/a	n/a	n/a	0.01	0.09	0.29	0	0.06	0.18	0.01	0.13	0.38	0.01	0.09	0.27	0.02	0.22	0.54	0	0.11	0.32	0.02	0.17	0.46	0.02	0.11	0.29	0.02	0.47	0.96	0.01	0.2	0.6	0	0.05	0.22	0.02	0.32	0.8	0.01	0.25	0.69
chr4:131895840:131895950:-@chr4:131895118:131895156:-@chr4:131893966:131894153:-	ENSMUSG00000028896	Rcc1	regulator of chromosome condensation 1	n/a	n/a	n/a	n/a	n/a	n/a	n/a	0.03	0.17	0.42	n/a	n/a	n/a	0.09	0.4	0.85	n/a	n/a	n/a	n/a	n/a	n/a	0.01	0.27	0.63	0.05	0.22	0.48	0.1	0.36	0.71	0.02	0.26	0.71	0.02	0.2	0.5	0.09	0.26	0.55	0.02	0.12	0.37	0.08	0.29	0.61
chr15:9025772:9025850:+@chr15:9028567:9028632:+@chr15:9029864:9029959:+	ENSMUSG00000022253	1110020G09Rik	hypothetical protein LOC68646 isoform 2	10	-0.575758	9.38416	0.7	0.75	0.05	1.12698	0.52	0.66	0.79	0.66	0.83	0.95	0.46	0.62	0.8	0.55	0.68	0.81	0.47	0.63	0.77	0.63	0.82	0.97	0.47	0.64	0.77	0.32	0.49	0.68	0.57	0.74	0.94	0.41	0.56	0.72	0.56	0.79	0.95	0.47	0.64	0.82	0.39	0.56	0.77
chr1:9539988:9540025:+@chr1:9540642:9540728:+@chr1:9543004:9543061:+	ENSMUSG00000025911	Adhfe1	WEAKLY SIMILAR TO NAD-DEPENDENT METHANOL DEHYDROGENASE (EC 1.1.1.244) homolog., RIKEN full-length enriched library, CLONE SKMUS2001129,Adult male liver tumor cDNA, clone:C730025H21 product:CDNA FLJ32430 FIS,Fe-containing alcohol dehydrogenase 1	n/a	n/a	n/a	n/a	n/a	n/a	n/a	0.04	0.13	0.28	0.08	0.23	0.47	0.02	0.14	0.38	0.08	0.36	0.65	0.05	0.32	0.75	0.01	0.07	0.22	0.03	0.13	0.29	0.03	0.12	0.34	0.07	0.23	0.53	0.04	0.18	0.44	0.04	0.34	0.92	0.02	0.16	0.59	0.03	0.33	0.94
chr17:21788770:21788912|21788865:+@chr17:21789234:21789312:+	ENSMUSG00000035868	3110052M02Rik	3110052M02Rik protein.	n/a	n/a	n/a	n/a	n/a	n/a	n/a	n/a	n/a	n/a	n/a	n/a	n/a	n/a	n/a	n/a	n/a	n/a	n/a	n/a	n/a	n/a	n/a	n/a	n/a	0.29	0.7	0.99	n/a	n/a	n/a	0.85	0.93	0.99	0.67	0.91	0.99	n/a	n/a	n/a	n/a	n/a	n/a	n/a	n/a	n/a
chr9:110863263:110863513:+@chr9:110865019:110865175:+@chr9:110868945:110869081:+	ENSMUSG00000032495	Lrrc2	leucine rich repeat containing 2	6	0.606061	11.1897	0.94	0.97	0.03	0.482047	0.86	0.96	0.99	0.85	0.94	0.99	0.82	0.93	0.99	0.95	0.98	1	0.84	0.94	0.99	0.92	0.98	1	0.81	0.91	0.99	0.5	0.59	0.69	0.87	0.96	1	0.72	0.82	0.91	0.73	0.87	0.97	0.76	0.89	0.98	0.75	0.91	1
chr4:147295241:147295118|147295116:-@chr4:147294278:147294419:-	ENSMUSG00000019055	Plod1	2-oxoglutarate 5-dioxygenase,procollagen-lysine	n/a	n/a	n/a	n/a	n/a	n/a	n/a	0.93	0.98	1	0.92	0.98	1	0.91	0.97	1	0.95	0.98	1	0.87	0.96	1	0.79	0.92	1	0.9	0.96	1	0.91	0.97	1	0.54	0.85	0.99	0.88	0.95	0.99	0.84	0.95	0.99	0.81	0.92	1	0.81	0.93	0.99
chr15:44259636:44261182:+@chr15:44262237:44262340:+@chr15:44263984:44264572:+	n/a	n/a	n/a	-1	0.181818	1.51999	0.07	0.06	-0.01	-0.777516	0	0.05	0.16	0.02	0.08	0.23	0.01	0.07	0.18	0	0.02	0.08	0.01	0.07	0.21	0.01	0.08	0.25	0	0.02	0.05	0.01	0.04	0.08	0.07	0.13	0.23	0.01	0.05	0.12	0	0.08	0.29	0.03	0.12	0.28	0.03	0.1	0.23
chr4:108518556:108518616:+@chr4:108523970:108524026:+@chr4:108525774:108525826:+	ENSMUSG00000028567	Txndc12	endoplasmic reticulum protein ERp19	n/a	n/a	n/a	n/a	n/a	n/a	n/a	0.01	0.08	0.26	0	0.07	0.23	0.01	0.09	0.22	0	0.05	0.2	0.01	0.12	0.35	0	0.03	0.12	0	0.02	0.08	0	0.03	0.06	0	0.04	0.15	0.01	0.05	0.12	0	0.03	0.11	0.01	0.15	0.46	0	0.06	0.22
chr6:83764863:83764716|83764706:-@chr6:83759706:83760069:-	ENSMUSG00000045896	Paip2b	poly(A) binding protein interacting protein 2B	n/a	n/a	n/a	n/a	n/a	n/a	n/a	0	0.07	0.21	0	0.07	0.24	0	0.08	0.23	0.01	0.09	0.27	0	0.08	0.28	0.01	0.05	0.18	0	0.03	0.08	0	0.04	0.13	0	0.12	0.28	0.02	0.09	0.23	0	0.09	0.28	0.01	0.13	0.38	0	0.08	0.29
chr5:31546136:31546205:+@chr5:31546287|31546291:31546364:+	n/a	n/a	n/a	-7	0.111111	5.15005	0.49	0.28	-0.21	-1.38079	0.06	0.5	0.98	0.07	0.38	0.69	0.18	0.59	0.94	0.01	0.13	0.49	0.02	0.29	0.71	0.43	0.76	0.99	0.02	0.2	0.6	0.05	0.46	0.98	0.02	0.19	0.6	0	0.18	0.68	0	0.33	0.82	0.01	0.21	0.66	0.01	0.27	0.81
chr10:62393051:62393184:+@chr10:62395467:62395530:+@chr10:62400166:62400287:+	ENSMUSG00000071253	Slc25a16	,solute carrier family 25 (mitochondrial carrier,Grave disease carrier protein homolog (GDC) (Mitochondrial solute carrier protein homolog) (Solute carrier family 25 member 16).	-10	-0.545455	7.30473	0.91	0.74	-0.17	-1.29431	0.74	0.91	0.99	0.71	0.9	0.99	0.75	0.92	0.99	0.8	0.92	0.99	0.55	0.83	0.98	0.76	0.92	1	0.84	0.95	1	0.86	0.95	0.99	0.67	0.9	0.99	0.66	0.85	0.98	0.58	0.85	0.99	0.46	0.78	0.96	0.48	0.82	0.99
chr7:134122380:134122510:+@chr7:134122819|134122836:134122917:+	ENSMUSG00000030682	Cdipt	CDP-diacylglycerol--inositol	n/a	n/a	n/a	n/a	n/a	n/a	n/a	0.03	0.08	0.18	0	0.05	0.14	0	0.07	0.27	0	0.08	0.27	0	0.06	0.19	0.03	0.14	0.37	0	0.05	0.18	0.01	0.04	0.11	0.01	0.07	0.18	0	0.05	0.22	0	0.03	0.09	0.04	0.17	0.4	0.01	0.07	0.18
chr2:165617405:165617471:-@chr2:165612664:165612747:-@chr2:165609652:165611238:-	ENSMUSG00000039671	Prkcbp1,mKIAA1125	protein kinase C binding protein 1,Mus musculus mRNA for mKIAA1125 protein.	9	-0.676768	10.0993	0.88	0.88	0	0.958159	0.63	0.83	0.97	0.79	0.93	1	0.61	0.88	0.99	0.45	0.74	0.94	0.5	0.8	0.99	0.68	0.91	1	0.5	0.75	0.95	0.35	0.63	0.94	0.11	0.3	0.53	0.24	0.49	0.79	0.86	0.95	1	0.67	0.89	1	0.77	0.91	0.98
chr7:134110528:134110719:+@chr7:134111221:134111259:+@chr7:134111441:134111558:+	ENSMUSG00000030683	Sez6l2	seizure related 6 homolog like 2	n/a	n/a	n/a	n/a	n/a	n/a	n/a	0.52	0.78	0.97	0.43	0.78	0.99	0.31	0.73	0.96	0.35	0.73	0.97	0.36	0.73	0.97	0.27	0.67	0.99	0.55	0.84	0.98	0.24	0.64	0.98	n/a	n/a	n/a	n/a	n/a	n/a	0.52	0.8	0.96	0.55	0.9	0.99	0.15	0.51	0.89
chr1:38089913:38090002:+@chr1:38090874:38090948:+	n/a	n/a	n/a	-1	-0.181818	0.880354	0	0	0	-0.929378	0	0	0.01	0	0	0.01	0	0.01	0.02	0	0	0.01	0	0.01	0.01	0	0.01	0.01	0	0	0.01	0	0	0.01	0	0.01	0.02	0	0	0.01	0	0.01	0.01	0	0	0.01	0	0.01	0.01
chr17:26342652:26342720:+@chr17:26344238:26344267:+@chr17:26344341:26344604:+	ENSMUSG00000024186	Rgs11	Mus musculus regulator of G-protein signaling 11 mRNA,regulator of G-protein signaling 11, partial cds.	n/a	n/a	n/a	n/a	n/a	n/a	n/a	0.14	0.57	0.95	n/a	n/a	n/a	n/a	n/a	n/a	n/a	n/a	n/a	n/a	n/a	n/a	0.06	0.48	0.99	n/a	n/a	n/a	n/a	n/a	n/a	n/a	n/a	n/a	n/a	n/a	n/a	n/a	n/a	n/a	n/a	n/a	n/a	n/a	n/a	n/a
chr8:4266556:4266680:-@chr8:4265226:4265276:-	n/a	n/a	n/a	72	3.19192	21.6817	0.07	0.15	0.07	3.17356	0.05	0.07	0.08	0.06	0.08	0.1	0.05	0.07	0.09	0.06	0.07	0.09	0.04	0.05	0.07	0.06	0.08	0.1	0.05	0.06	0.07	0.06	0.07	0.09	0.11	0.14	0.17	0.11	0.13	0.16	0.12	0.15	0.19	0.08	0.11	0.14	0.09	0.12	0.15
chr2:115407349:115407721:+@chr2:115429300:115429366:+@chr2:115456741:115456786:+	ENSMUSG00000040282	BC052040	hypothetical protein LOC399568	n/a	n/a	n/a	n/a	n/a	n/a	n/a	n/a	n/a	n/a	n/a	n/a	n/a	n/a	n/a	n/a	0.14	0.58	0.96	0.04	0.37	0.86	0	0.17	0.58	0.01	0.21	0.73	0.01	0.33	0.97	0	0.34	0.8	0.04	0.38	0.91	n/a	n/a	n/a	n/a	n/a	n/a	n/a	n/a	n/a
chr1:137326845:137327076:-@chr1:137323508:137323618:-@chr1:137316869:137316930:-	ENSMUSG00000041879	Importin9,Ipo9	importin 9, complete cds.,Mus musculus Importin9 isoform 1 (Importin9) mRNA	8	0.979798	4.71829	0.17	0.27	0.1	1.48787	0.04	0.17	0.33	0.04	0.14	0.3	0.04	0.2	0.41	0.02	0.11	0.25	0.05	0.21	0.48	0.01	0.07	0.25	0.04	0.15	0.29	0.03	0.08	0.18	0.25	0.48	0.73	0.05	0.15	0.3	0.2	0.39	0.64	0.12	0.45	0.88	0.15	0.46	0.9
chr9:102524026:102524294:-@chr9:102523603:102523624:-@chr9:102522022:102522090:-	ENSMUSG00000032534	Cep63,D9Mgc48e	full insert sequence.,2 days pregnant adult female ovary cDNA, RIKEN full-length enriched library, clone:E330010B05 product:hypothetical protein,centrosomal protein 63	n/a	n/a	n/a	n/a	n/a	n/a	n/a	0	0.12	0.38	0	0.12	0.41	0.05	0.32	0.71	0.01	0.13	0.35	0.04	0.32	0.82	0.01	0.2	0.57	0.01	0.1	0.29	0.01	0.12	0.41	0.01	0.13	0.41	0	0.1	0.29	0.01	0.13	0.35	0.01	0.4	0.91	0	0.16	0.46
chr1:45875667:45875762:+@chr1:45876334:45876503:+	n/a	n/a	n/a	2	-0.030303	1.3062	0.02	0.06	0.03	1.55436	0.01	0.02	0.05	0	0.01	0.03	0.01	0.04	0.1	0	0.01	0.02	0.02	0.07	0.17	0.01	0.03	0.06	0	0.02	0.04	0	0.01	0.03	0	0.02	0.05	0.02	0.05	0.1	0.01	0.03	0.07	0	0.02	0.04	0	0.02	0.05
chr9:75041580:75041944:+@chr9:75043933:75044007:+@chr9:75045450:75045543:+	ENSMUSG00000034593	Myo5a	clone:6720408E05 product:myosin Va, full insert sequence.,Mus musculus 12 days embryo male wolffian duct includes surrounding region cDNA,myosin Va, RIKEN full-length enriched library	n/a	n/a	n/a	n/a	n/a	n/a	n/a	n/a	n/a	n/a	n/a	n/a	n/a	n/a	n/a	n/a	n/a	n/a	n/a	n/a	n/a	n/a	0.16	0.55	0.9	0.22	0.58	0.91	0.23	0.58	0.92	0.1	0.55	0.93	0.07	0.57	0.97	0.26	0.69	0.95	n/a	n/a	n/a	0.33	0.7	0.97
chr17:30736984:30737124:-@chr17:30734817|30734837:30734750:-	ENSMUSG00000024026	Glo1	glyoxalase 1	n/a	n/a	n/a	n/a	n/a	n/a	n/a	0	0.01	0.03	0	0.01	0.04	0	0.01	0.03	0	0.03	0.09	0	0.03	0.11	0	0.03	0.09	0	0.01	0.03	0	0.01	0.04	0	0.03	0.1	0.01	0.06	0.14	0	0.01	0.04	0	0.01	0.05	0.01	0.03	0.08
chr5:130487841:130487735|130487733:-@chr5:130487128:130487570:-	ENSMUSG00000025533	n/a	argininosuccinate lyase	n/a	n/a	n/a	n/a	n/a	n/a	n/a	0	0.12	0.41	n/a	n/a	n/a	0.06	0.26	0.61	0.01	0.22	0.71	n/a	n/a	n/a	n/a	n/a	n/a	n/a	n/a	n/a	n/a	n/a	n/a	n/a	n/a	n/a	n/a	n/a	n/a	n/a	n/a	n/a	n/a	n/a	n/a	n/a	n/a	n/a
chr14:73764349:73764499:-@chr14:73763388:73763390:-@chr14:73761021:73762950:-	ENSMUSG00000022108	Itm2b	integral membrane protein 2B	n/a	n/a	n/a	n/a	n/a	n/a	n/a	0	0	0.01	0	0	0.01	0	0	0.01	0	0.01	0.02	0	0.01	0.03	0	0	0.02	0	0	0.01	0	0	0	0	0	0	0	0	0	0	0	0.01	0	0	0.01	0	0	0.01
chr14:17260988:17261113:+@chr14:17261852|17261858:17261946:+	ENSMUSG00000017485	Top2b	topoisomerase (DNA) II beta	n/a	n/a	n/a	n/a	n/a	n/a	n/a	0.69	0.93	1	0.58	0.85	0.99	0.49	0.81	0.98	0.71	0.91	1	0.71	0.88	0.98	0.8	0.94	1	0.77	0.92	0.99	0.82	0.94	0.99	0.63	0.89	0.99	0.74	0.91	0.99	0.5	0.81	0.97	0.76	0.91	0.99	0.77	0.92	1
chr5:135609624:135609743:+@chr5:135609817:135609991:+	n/a	n/a	n/a	n/a	n/a	n/a	n/a	n/a	n/a	n/a	0.38	0.61	0.88	0.32	0.51	0.78	0.45	0.69	0.92	0.27	0.54	0.84	0.25	0.59	0.92	0.01	0.09	0.29	0.45	0.68	0.97	0.36	0.55	0.79	0.7	0.88	1	0.55	0.81	0.99	0.27	0.51	0.75	0.32	0.58	0.9	0.22	0.5	0.95
chr5:134719771:134719826:-@chr5:134719457|134719469:134719377:-	ENSMUSG00000060261	Diws1t	general transcription factor II I isoform 3,general transcription factor II I isoform 4,general transcription factor II I isoform 5	-11	-1.33333	6.09852	0.35	0.2	-0.14	-1.58508	0.26	0.35	0.45	0.27	0.36	0.46	0.23	0.33	0.43	0.27	0.38	0.49	0.13	0.3	0.5	0.31	0.4	0.5	0.21	0.32	0.44	0.18	0.29	0.41	0.22	0.32	0.43	0.19	0.27	0.37	0.21	0.32	0.45	0.11	0.21	0.31	0.09	0.19	0.32
chr2:91520500:91520614:-@chr2:91520077:91520154:-@chr2:91519470:91519586:-	ENSMUSG00000027244	D2Ertd391e	hypothetical protein LOC51897	n/a	n/a	n/a	n/a	n/a	n/a	n/a	0.81	0.93	0.99	0.88	0.96	1	0.87	0.94	0.99	0.92	0.98	1	0.82	0.94	0.99	0.78	0.92	1	0.94	0.98	1	0.69	0.87	0.99	0.92	0.98	1	0.8	0.93	0.99	0.79	0.93	0.99	0.79	0.92	1	0.79	0.92	0.99
chr16:20550494:20550760:+@chr16:20551547|20551552:20551627:+	ENSMUSG00000003234	Abcf3	,ATP-binding cassette, RIKEN full-length enriched library, WEAKLY SIMILAR TO GCN20 PROTEIN homolog [Homo sapiens],Mus musculus adult male pituitary gland cDNA, full insert sequence., clone:5330439H14 product:CDNA FLJ11198 FIS, CLONE PLACE1007697, sub-family F (GCN20)	n/a	n/a	n/a	n/a	n/a	n/a	n/a	0.62	0.86	1	0.74	0.9	0.99	0.52	0.78	0.99	0.05	0.43	0.88	0.49	0.82	0.99	0.72	0.91	0.99	0.72	0.93	0.99	0.72	0.89	0.99	0.15	0.51	0.9	0.46	0.8	0.99	0.47	0.8	0.98	0.45	0.8	0.98	0.27	0.69	0.93
chr4:107515821:107515949:+@chr4:107520046|107520049:107520171:+	ENSMUSG00000028613	AK076555	clone:4932703M08 product:low density lipoprotein receptor-related protein 8, apolipoprotein e receptor,Mus musculus adult male testis cDNA, RIKEN full-length enriched library	n/a	n/a	n/a	n/a	n/a	n/a	n/a	0.05	0.51	0.98	n/a	n/a	n/a	n/a	n/a	n/a	n/a	n/a	n/a	n/a	n/a	n/a	n/a	n/a	n/a	n/a	n/a	n/a	0.03	0.48	0.95	n/a	n/a	n/a	n/a	n/a	n/a	n/a	n/a	n/a	n/a	n/a	n/a	n/a	n/a	n/a
chr10:127865647:127865759:+@chr10:127872369:127872640:+@chr10:127873524:127874136:+	ENSMUSG00000025373	Rnf41	ring finger protein 41,E3 ubiquitin-protein ligase NRDP1 (EC 6.3.2.-) (RING finger protein 41).	n/a	n/a	n/a	n/a	n/a	n/a	n/a	0.91	0.97	1	0.89	0.96	0.99	0.91	0.97	1	0.79	0.91	0.98	0.73	0.87	0.97	0.9	0.96	1	0.88	0.97	1	0.9	0.97	1	0.66	0.84	0.96	0.73	0.89	0.98	0.79	0.89	0.97	0.84	0.94	0.99	0.77	0.89	0.97
chr11:69843616:69843954:+@chr11:69844097|69844106:69844156:+	ENSMUSG00000020886	Dlg4	postsynaptic density protein 95	n/a	n/a	n/a	n/a	n/a	n/a	n/a	0.36	0.75	0.99	0.41	0.74	0.99	n/a	n/a	n/a	n/a	n/a	n/a	n/a	n/a	n/a	0.3	0.75	0.99	0.06	0.47	0.92	n/a	n/a	n/a	0.6	0.83	0.96	0.52	0.82	0.97	n/a	n/a	n/a	n/a	n/a	n/a	0.07	0.4	0.82
chr11:85615287:85615454:+@chr11:85635524:85635614:+@chr11:85638704:85639560:+	ENSMUSG00000059439	Bcas3	Mus musculus 10 days embryo whole body cDNA, RIKEN full-length enriched library, clone:2610028P08 product:inferred: Mus musculus K20D4 (K20D4) mRNA, complete cds, full insert sequence.,breast carcinoma amplified sequence 3,Breast carcinoma amplified sequence 3 (Fragment).	-2	0.161616	3.24647	0.75	0.77	0.03	-0.665837	0.68	0.82	0.95	0.59	0.77	0.91	0.4	0.65	0.93	0.68	0.86	0.97	0.57	0.85	0.99	0.42	0.7	0.94	0.59	0.77	0.91	0.82	0.91	0.97	0.49	0.65	0.83	0.79	0.93	0.98	0.44	0.64	0.85	0.31	0.58	0.83	0.32	0.59	0.83
chr5:32000057:32000450:+@chr5:32004199:32004300:+@chr5:32004404:32004476:+	ENSMUSG00000052139	n/a	complete cds.,Mus musculus brain and reproductive organ-expressed protein (Bre) mRNA,brain and reproductive organ-expressed protein	n/a	n/a	n/a	n/a	n/a	n/a	n/a	0.84	0.95	1	0.78	0.92	0.99	0.78	0.94	1	0.89	0.96	1	0.66	0.87	0.99	0.72	0.9	1	0.79	0.93	1	0.88	0.95	0.99	0.91	0.98	1	0.89	0.96	0.99	0.82	0.93	0.99	0.77	0.93	1	0.69	0.89	0.98
chr2:128761282:128761060|128761048:-@chr2:128758935:128759068:-	ENSMUSG00000027387	Zc3h8	zinc finger CCCH type containing 8	n/a	n/a	n/a	n/a	n/a	n/a	n/a	0.24	0.7	0.98	0.38	0.73	0.94	0.47	0.77	0.98	0.19	0.65	0.98	0.29	0.69	1	0.62	0.86	0.98	0.54	0.86	0.99	0.29	0.66	0.96	0.4	0.74	0.95	0.3	0.72	0.99	0.24	0.65	0.97	0.04	0.39	0.9	0.27	0.71	0.99
chr14:76956238:76956510:-@chr14:76939713:76939861:-@chr14:76932614:76933053:-	n/a	n/a	n/a	n/a	n/a	n/a	n/a	n/a	n/a	n/a	0.25	0.62	0.94	n/a	n/a	n/a	n/a	n/a	n/a	n/a	n/a	n/a	n/a	n/a	n/a	0.05	0.4	0.96	0.05	0.48	0.92	0.23	0.75	1	0.04	0.48	0.98	0.17	0.55	0.96	n/a	n/a	n/a	0.07	0.41	0.84	n/a	n/a	n/a
chr16:87495974:87496136:-@chr16:87494582:87494672:-@chr16:87493952:87494031:-	ENSMUSG00000025613	Cct8	chaperonin subunit 8 (theta)	-25	-0.323232	20.2628	0.98	0.88	-0.1	-1.21783	0.95	0.98	1	0.95	0.98	1	0.94	0.98	1	0.95	0.98	1	0.91	0.97	1	0.91	0.97	1	0.95	0.98	1	0.95	0.98	1	0.89	0.97	1	0.91	0.97	1	0.93	0.97	1	0.7	0.86	0.99	0.38	0.52	0.68
chr15:73151267:73151205|73151201:-@chr15:73140245:73140299:-	ENSMUSG00000022607	FAK,Ptk2	complete cds., RIKEN full-length enriched library,Mus musculus mRNA for focal adhesion kinase spliced variant p110FAK, clone:1600015M17 product:PTK2 protein tyrosine kinase 2, full insert sequence.,Adult female placenta cDNA	n/a	n/a	n/a	n/a	n/a	n/a	n/a	0.07	0.37	0.73	n/a	n/a	n/a	n/a	n/a	n/a	0	0.18	0.53	n/a	n/a	n/a	0.04	0.31	0.77	0.02	0.18	0.51	0.03	0.34	0.7	0.03	0.2	0.55	0.02	0.13	0.45	n/a	n/a	n/a	0.01	0.49	0.84	n/a	n/a	n/a
chr19:7014842:7015693:-@chr19:7014019:7014244:-@chr19:7013751:7013900:-	ENSMUSG00000024958	Gpr137	clone:E530017B08 product:Bcl-associated death promoter,10 days neonate olfactory brain cDNA, RIKEN full-length enriched library	-6	-0.0707071	9.87114	0.94	0.89	-0.05	-0.600669	0.89	0.96	0.99	0.88	0.95	0.99	0.82	0.9	0.96	0.94	0.98	1	0.48	0.64	0.8	0.85	0.95	1	0.81	0.9	0.97	0.97	0.99	1	0.91	0.97	1	0.94	0.98	1	0.65	0.8	0.94	0.75	0.91	0.99	0.65	0.86	0.97
chr5:44454365:44454423:-@chr5:44449865:44449891:-@chr5:44447117:44447322:-	n/a	na/a	n/a	n/a	n/a	n/a	n/a	n/a	n/a	n/a	n/a	n/a	n/a	n/a	n/a	n/a	n/a	n/a	n/a	n/a	n/a	n/a	n/a	n/a	n/a	n/a	n/a	n/a	n/a	n/a	n/a	n/a	n/a	n/a	n/a	n/a	n/a	n/a	n/a	n/a	n/a	n/a	n/a	n/a	n/a	n/a	n/a	n/a	n/a
chr4:115747521:115747691:-@chr4:115743273:115743362:-@chr4:115742414:115742629:-	n/a	n/a	n/a	16	-1.67677	29.4113	0.26	0.45	0.18	0.601019	0.23	0.26	0.29	0.27	0.3	0.33	0.2	0.23	0.27	0.47	0.51	0.55	0.39	0.44	0.5	0.63	0.68	0.74	0.19	0.22	0.25	0.12	0.14	0.16	0.21	0.24	0.28	0.16	0.18	0.21	0.19	0.22	0.25	0.21	0.26	0.31	0.09	0.12	0.16
chr19:47160445:47160611:-@chr19:47159263:47159348:-@chr19:47157006:47158059:-	n/a	n/a	n/a	n/a	n/a	n/a	n/a	n/a	n/a	n/a	0.01	0.03	0.06	0.01	0.02	0.06	0.01	0.04	0.07	0	0.01	0.02	0.01	0.04	0.08	0	0	0	0	0.01	0.02	0	0	0.01	0.01	0.01	0.02	0.01	0.02	0.03	0.01	0.02	0.05	0	0.01	0.05	0	0.01	0.03
chr2:90689755:90689861:+@chr2:90692997:90693023:+@chr2:90693208:90693270:+	ENSMUSG00000027282	Mtch2	mitochondrial carrier homolog 2	n/a	n/a	n/a	n/a	n/a	n/a	n/a	0.9	0.96	1	0.88	0.96	0.99	0.93	0.98	1	0.76	0.93	1	0.86	0.96	1	0.92	0.98	1	0.96	0.99	1	0.86	0.96	1	0.9	0.97	1	0.84	0.93	0.99	0.7	0.89	0.98	0.93	0.98	1	0.9	0.97	1
chr4:128859576:128859776:-@chr4:128859211:128859344:-	n/a	n/a	n/a	-4	0.232323	2.71482	0.73	0.72	0	-1.55897	0.4	0.72	0.97	0.44	0.74	0.98	0.4	0.72	0.97	0.72	0.9	0.98	0.3	0.65	0.91	0.49	0.74	0.95	0.68	0.83	0.93	0.38	0.64	0.92	0.74	0.93	1	0.46	0.67	0.88	0.14	0.48	0.98	0.23	0.51	0.81	0.52	0.83	1
chr13:73632250:73632362:+@chr13:73633628:73633688:+@chr13:73636747:73636805:+	ENSMUSG00000021608	Aytl2	acyltransferase like 2,1-acylglycerophosphocholine O-acyltransferase 1 (EC 2.3.1.23) (Lung- type acyl-coa:lysophosphatidylcholine acyltransferase 1) (mLPCAT1) (Acyltransferase-like 2).	n/a	n/a	n/a	n/a	n/a	n/a	n/a	0.46	0.83	0.99	0.37	0.7	0.94	0.25	0.6	0.89	0.51	0.79	0.97	0.29	0.61	0.87	0.22	0.58	0.91	0.6	0.86	0.98	0.3	0.65	0.91	0.47	0.78	0.97	0.32	0.7	0.95	0.4	0.72	0.95	0.3	0.65	0.94	0.09	0.51	0.89
chr19:3864648:3864759:+@chr19:3871003:3871062:+@chr19:3875735:3878614:+	ENSMUSG00000024843	Chka	Choline kinase alpha (EC 2.7.1.32) (CK) (CHETK-alpha)., complete cds.,choline kinase alpha isoform 1,Mus musculus mRNA for choline kinase	n/a	n/a	n/a	n/a	n/a	n/a	n/a	0.11	0.47	0.82	0.22	0.6	0.92	0.05	0.47	0.9	0.05	0.6	0.97	0.02	0.42	0.93	0	0.21	0.49	0.09	0.4	0.75	0.02	0.16	0.47	0.03	0.17	0.48	0.01	0.17	0.45	0.11	0.53	0.93	0.06	0.41	0.82	0.02	0.3	0.76
chr1:16655263:16655586:+@chr1:16657746|16657749:16657854:+	ENSMUSG00000025940	Tmem70	hypothetical protein LOC70397 isoform 1,hypothetical protein LOC70397 isoform 2	10	0.989899	5.80577	0.09	0.25	0.16	1.55192	0.02	0.06	0.16	0.04	0.11	0.2	0.03	0.11	0.2	0	0.05	0.14	0.05	0.39	0.79	0	0.05	0.16	0	0.04	0.14	0	0.02	0.04	0	0.02	0.03	0.02	0.03	0.06	0.01	0.08	0.18	0.01	0.08	0.26	0.01	0.09	0.34
chr8:97356415:97356600:-@chr8:97355673:97355825:-@chr8:97353054:97353130:-	ENSMUSG00000031781	Ciapin1	RIKEN full-length enriched library, clone:2810413N20 product:hypothetical S-adenosyl-L-methionine-dependent methyltransferases structure containing protein, 11 days embryo whole body cDNA,Mus musculus 10, full insert sequence.,cytokine induced apoptosis inhibitor 1	n/a	n/a	n/a	n/a	n/a	n/a	n/a	0.89	0.97	0.99	0.9	0.97	1	0.87	0.95	0.99	0.85	0.95	1	0.86	0.96	1	0.92	0.97	1	0.85	0.94	0.99	0.89	0.96	1	0.92	0.97	1	0.91	0.97	1	0.84	0.94	1	0.87	0.95	0.99	0.76	0.91	0.99
chr12:87452561:87452625:+@chr12:87479743:87479775:+@chr12:87481002:87481045:+	ENSMUSG00000007867	1700019E19Rik	hypothetical protein LOC76411	n/a	n/a	n/a	n/a	n/a	n/a	n/a	0.57	0.83	0.99	0.79	0.93	0.99	0.74	0.92	1	0.84	0.94	0.99	0.85	0.96	1	0.78	0.94	0.99	0.8	0.93	0.99	0.86	0.95	0.99	0.9	0.97	1	0.93	0.98	1	0.69	0.9	0.99	0.59	0.86	0.98	0.67	0.88	0.99
chr11:61181175:61181219:-@chr11:61180031:61180396:-@chr11:61176896:61176993:-	ENSMUSG00000010122	Slc47a1,RP23-451A6.3	solute carrier family 47, member 1,Novel protein.	4	-1.09091	9.48267	0.71	0.74	0.03	0.536865	0.56	0.76	0.93	0.51	0.73	0.96	0.4	0.65	0.97	0.29	0.44	0.6	0.39	0.63	0.92	0.47	0.73	0.97	0.38	0.52	0.68	0.45	0.58	0.72	0.4	0.53	0.69	0.45	0.57	0.72	0.49	0.67	0.88	0.33	0.5	0.69	0.17	0.28	0.43
chr10:57412009:57412076:+@chr10:57427880:57427987:+@chr10:57447896:57448072:+	ENSMUSG00000019876	Pkib	cAMP-dependent protein kinase inhibitor beta	n/a	n/a	n/a	n/a	n/a	n/a	n/a	n/a	n/a	n/a	n/a	n/a	n/a	n/a	n/a	n/a	n/a	n/a	n/a	n/a	n/a	n/a	n/a	n/a	n/a	n/a	n/a	n/a	n/a	n/a	n/a	n/a	n/a	n/a	n/a	n/a	n/a	n/a	n/a	n/a	n/a	n/a	n/a	n/a	n/a	n/a
chr2:26771475:26771526:-@chr2:26771249|26771269:26771116:-	ENSMUSG00000015790	Surf1	Surf1 protein.,surfeit gene 1	21	-0.717172	11.0591	0.17	0.41	0.24	1.96374	0.09	0.22	0.41	0.03	0.15	0.39	0.02	0.14	0.32	0.09	0.24	0.44	0.01	0.08	0.26	0.02	0.22	0.51	0.03	0.1	0.2	0.02	0.06	0.13	0.05	0.18	0.37	0.01	0.07	0.21	0.02	0.1	0.22	0.02	0.25	0.6	0.01	0.06	0.2
chrX:12283658:12283818:-@chrX:12283425:12283571:-	n/a	n/a	n/a	n/a	n/a	n/a	n/a	n/a	n/a	n/a	0.01	0.04	0.15	0.03	0.12	0.3	0.02	0.1	0.26	0	0.09	0.29	0	0.05	0.18	0	0.05	0.16	0.01	0.06	0.15	0.01	0.04	0.12	0.01	0.1	0.26	0.02	0.1	0.24	0	0.11	0.39	0	0.06	0.18	0	0.1	0.31
chr18:74434997:74435071:+@chr18:74435558:74435725:+@chr18:74436061:74436369:+	ENSMUSG00000024561	Mbd1	methyl-CpG binding domain protein 1	-28	-0.878788	17.5011	0.61	0.28	-0.33	-1.54969	0.49	0.66	0.84	0.42	0.62	0.83	0.39	0.55	0.74	0.18	0.38	0.66	0.14	0.3	0.53	0.28	0.43	0.59	0.52	0.65	0.78	0.38	0.51	0.65	0.24	0.37	0.54	0.19	0.28	0.4	0.42	0.57	0.77	0.53	0.66	0.8	0.58	0.77	0.93
chr6:146499161:146499296:-@chr6:146498609:146498686:-@chr6:146498154:146498507:-	ENSMUSG00000040250	4933424B01Rik	hypothetical protein LOC71177	n/a	n/a	n/a	n/a	n/a	n/a	n/a	0.54	0.83	1	0.59	0.84	0.97	0.43	0.78	0.98	0.67	0.9	0.99	0.51	0.82	0.97	0.49	0.76	0.94	0.65	0.88	0.98	0.45	0.76	0.99	0.46	0.7	0.9	0.56	0.82	0.97	0.39	0.76	0.99	0.47	0.74	0.96	0.42	0.76	0.97
chr7:135598450:135598546:-@chr7:135592233|135592284:135592135:-	ENSMUSG00000030846	Tial1	Tial1 cytotoxic granule-associated RNA binding	-11	1.56566	11.527	0.2	0.19	-0.01	-1.09011	0.04	0.16	0.33	0.07	0.23	0.48	0.06	0.2	0.44	0.2	0.38	0.63	0.08	0.3	0.71	0.04	0.11	0.2	0.18	0.31	0.44	0.14	0.26	0.41	0.18	0.32	0.49	0.21	0.35	0.52	0.32	0.54	0.76	0.18	0.42	0.84	0.15	0.42	0.78
chr9:66879833:66879758|66879754:-@chr9:66879259:66879321:-	ENSMUSG00000032366	Perq1	Mus musculus adult male kidney cDNA, beta, clone:0610007B22 product:tropomyosin 2, RIKEN full-length enriched library	n/a	n/a	n/a	n/a	n/a	n/a	n/a	0	0	0	0	0	0	0	0	0	0	0	0	0	0	0	0	0	0	0	0	0	0	0	0	0	0	0	0	0	0	0	0	0	0	0	0	0	0	0
chr16:87699170:87699301:+@chr16:87715576:87715869:+@chr16:87719052:87720395:+	ENSMUSG00000025612	Bach1	BTB and CNC homology 1	-54	2.69697	22.9793	0.84	0.55	-0.28	-2.4673	0.68	0.86	0.99	0.66	0.8	0.94	0.65	0.85	0.99	0.58	0.81	0.99	0.69	0.88	0.98	0.75	0.93	0.99	0.42	0.54	0.69	0.3	0.43	0.56	0.25	0.36	0.49	0.26	0.35	0.47	0.26	0.39	0.53	0.24	0.38	0.56	0.27	0.39	0.54
chr9:4309537:4309934:+@chr9:4313702:4313806:+@chr9:4316827:4317071:+	ENSMUSG00000025893	Kbtbd3	kelch repeat and BTB (POZ) domain containing 3	-31	0.919192	17.2484	0.74	0.27	-0.46	-1.85056	0.29	0.59	0.88	0.5	0.81	0.98	0.56	0.81	0.96	0.64	0.82	0.96	0.53	0.77	0.94	0.22	0.37	0.54	0.56	0.85	1	0.36	0.61	0.83	0.13	0.29	0.51	0.18	0.29	0.42	0.49	0.73	0.92	0.44	0.81	0.98	0.38	0.68	0.94
chr7:117214886:117214969:+@chr7:117215633:117215716:+@chr7:117217582:117217778:+	ENSMUSG00000061079	Zfp143	zinc finger protein 143	n/a	n/a	n/a	n/a	n/a	n/a	n/a	0.62	0.88	1	0.37	0.72	0.97	0.27	0.66	0.94	0.45	0.73	0.93	0.3	0.69	0.99	0.31	0.66	0.97	0.65	0.89	0.99	0.67	0.89	1	0.27	0.64	0.97	0.17	0.46	0.94	0.27	0.62	0.89	0.57	0.84	0.98	0.43	0.74	0.96
chr14:56518021:56518142:-@chr14:56517223|56517314:56517080:-	ENSMUSG00000022223	2310014G06Rik	hypothetical protein LOC654795, RIKEN full-length enriched library,Mus musculus adult male tongue cDNA, clone:2310014G06 product:hypothetical Conserved hypothetical protein, YfcH containing protein, full insert sequence.	14	-0.424242	8.87863	0.15	0.29	0.14	1.6246	0.12	0.18	0.24	0.09	0.15	0.21	0.08	0.12	0.18	0.14	0.22	0.31	0.07	0.13	0.21	0.11	0.17	0.24	0.15	0.2	0.27	0.15	0.21	0.28	0.15	0.2	0.27	0.07	0.11	0.14	0.1	0.16	0.23	0.12	0.2	0.3	0.16	0.26	0.39
chr2:158186335:158186200|158186195:-@chr2:158184918:158185168:-	n/a	n/a	n/a	n/a	n/a	n/a	n/a	n/a	n/a	n/a	0.13	0.61	0.96	0.1	0.48	0.9	0.07	0.42	0.83	0.05	0.52	0.94	0.03	0.43	0.96	0.01	0.44	0.94	0.06	0.49	0.91	0.06	0.51	0.9	0.04	0.36	0.77	0.04	0.39	0.84	0.13	0.65	0.98	0.37	0.74	0.98	0.01	0.49	0.92
chr2:158461043:158461162:+@chr2:158461744:158461883:+	n/a	n/a	n/a	n/a	n/a	n/a	n/a	n/a	n/a	n/a	0.1	0.25	0.52	0.15	0.33	0.66	0.06	0.19	0.47	0.06	0.14	0.27	0.3	0.54	0.81	n/a	n/a	n/a	0.2	0.4	0.77	0.59	0.85	1	0.11	0.22	0.43	0.09	0.24	0.49	0.08	0.19	0.38	0.04	0.11	0.23	0.08	0.23	0.58
chr8:108009362:108009408:-@chr8:108008089:108008327:-@chr8:108007090:108007683:-	n/a	n/a	n/a	n/a	n/a	n/a	n/a	n/a	n/a	n/a	0.85	0.96	1	0.88	0.96	1	0.88	0.96	1	0.9	0.97	1	0.85	0.95	0.99	0.9	0.97	1	0.86	0.95	1	0.58	0.78	0.94	0.67	0.85	0.98	0.77	0.91	0.98	0.85	0.96	1	0.84	0.96	1	0.76	0.93	1
chr17:25371834:25371753|25371749:-@chr17:25369170:25371667:-	ENSMUSG00000035521	Mdcp1,Gnptg	clone:A830081F19 product:similar to C316G12.3 (CAB56184) [Homo sapiens], RIKEN full-length enriched library,N-acetylglucosamine-1-phosphotransferase, full insert sequence.,Mus musculus 10 days neonate cortex cDNA, gamma	n/a	n/a	n/a	n/a	n/a	n/a	n/a	0.01	0.08	0.26	0.01	0.18	0.5	0	0.13	0.46	0.01	0.07	0.22	0.01	0.09	0.32	0.02	0.15	0.38	0	0.09	0.27	0	0.04	0.15	0.02	0.15	0.49	0.01	0.08	0.24	0.01	0.08	0.22	0.03	0.19	0.53	0.01	0.14	0.36
chr7:16552769:16552917:-@chr7:16549256:16549715:-@chr7:16548729:16548826:-	ENSMUSG00000074364	Ehd2	EH-domain containing 2	n/a	n/a	n/a	n/a	n/a	n/a	n/a	0.96	0.99	1	0.96	0.98	1	0.94	0.98	1	0.93	0.97	1	0.94	0.98	1	0.93	0.97	1	0.95	0.99	1	0.89	0.96	0.99	0.85	0.95	1	0.88	0.96	1	0.98	0.99	1	0.94	0.98	1	0.85	0.96	1
chr16:57606779:57607094:-@chr16:57323577:57323656:-@chr16:57318019:57318093:-	ENSMUSG00000022748	n/a	n/a	-4	-0.111111	2.74833	0.96	0.75	-0.21	-1.415	0.93	0.98	1	0.9	0.97	1	0.84	0.94	0.99	0.93	0.98	1	0.92	0.98	1	0.93	0.98	1	0.92	0.98	1	0.94	0.98	1	0.98	0.99	1	0.98	0.99	1	0.89	0.96	1	0.74	0.92	0.99	0.78	0.93	1
chr12:85711206:85711336|85711304:+@chr12:85711874:85712120:+	ENSMUSG00000021235	Coq6	Mus musculus 13 days embryo forelimb cDNA, full insert sequence., clone:5930427M12 product:hypothetical Aromatic-ring hydroxylase (flavoprotein monooxygenase) containing protein,coenzyme Q6 homolog, RIKEN full-length enriched library	-1	-0.0808081	0.906506	0.96	0.91	-0.05	-1.01399	0.88	0.96	1	0.9	0.96	1	0.88	0.96	1	0.91	0.97	1	0.62	0.84	0.99	0.93	0.98	1	0.87	0.97	1	0.86	0.95	1	0.85	0.95	1	0.88	0.96	1	0.89	0.97	1	0.81	0.95	1	0.76	0.93	0.99
chr13:62659847:62659989:-@chr13:62635971:62636174:-@chr13:62621778:62621904:-	ENSMUSG00000074865	6720457D02Rik	clone:6720457D02 product:weakly similar to KRUPPEL-RELATED ZINC FINGER PROTEIN F80-S [Mus musculus],Mus musculus 12 days embryo male wolffian duct includes surrounding region cDNA, full insert sequence.,hypothetical protein LOC77117, RIKEN full-length enriched library	n/a	n/a	n/a	n/a	n/a	n/a	n/a	0.02	0.32	0.86	0	0.07	0.27	0	0.09	0.34	0.02	0.14	0.42	0.06	0.29	0.71	0.04	0.3	0.87	0.1	0.33	0.78	0.06	0.21	0.45	0.05	0.16	0.34	0.01	0.07	0.15	0.02	0.13	0.34	0.05	0.18	0.52	0.08	0.47	0.9
chr5:134858651:134858700:-@chr5:134858400:134858456:-@chr5:134855807:134855890:-	ENSMUSG00000023079	Gtf2ird1	general transcription factor II I repeat, complete cds.,Mus musculus muscle TFII-I repeat domain-containing protein 1 beta 1 mRNA	-7	0.141414	3.52197	0.85	0.65	-0.2	-2.02768	0.58	0.84	0.98	0.69	0.88	0.99	0.57	0.82	0.96	0.34	0.73	0.96	0.73	0.91	0.99	0.28	0.58	0.88	0.62	0.85	1	0.56	0.83	0.99	0.52	0.8	0.96	0.76	0.93	1	0.29	0.52	0.78	0.29	0.58	0.87	0.46	0.71	0.96
chr2:180750248:180750314:+@chr2:180750395:180750562:+@chr2:180750960:180751037:+	ENSMUSG00000016356	Col20a1	Collagen alpha-1(XX) chain (Fragment).	n/a	n/a	n/a	n/a	n/a	n/a	n/a	n/a	n/a	n/a	n/a	n/a	n/a	n/a	n/a	n/a	0.51	0.78	0.96	n/a	n/a	n/a	n/a	n/a	n/a	n/a	n/a	n/a	n/a	n/a	n/a	n/a	n/a	n/a	n/a	n/a	n/a	n/a	n/a	n/a	n/a	n/a	n/a	n/a	n/a	n/a
chr1:93309470:93309556:-@chr1:93309373|93309379:93309298:-	ENSMUSG00000067071	Hes6	Mus musculus mRNA for HES6,hairy and enhancer of split 6, complete cds.	n/a	n/a	n/a	n/a	n/a	n/a	n/a	0.13	0.65	0.97	0.37	0.7	0.94	0.34	0.77	0.98	0.02	0.37	0.83	n/a	n/a	n/a	n/a	n/a	n/a	0.15	0.61	0.94	0.15	0.55	0.96	0.1	0.44	0.85	0.03	0.39	0.88	0.43	0.75	0.99	n/a	n/a	n/a	n/a	n/a	n/a
chr15:91668696:91668851:+@chr15:91690070:91690240:+@chr15:91690701:91690977:+	ENSMUSG00000047295	n/a	n/a	n/a	n/a	n/a	n/a	n/a	n/a	n/a	n/a	n/a	n/a	n/a	n/a	n/a	n/a	n/a	n/a	n/a	n/a	n/a	n/a	n/a	n/a	n/a	n/a	n/a	n/a	n/a	n/a	0.2	0.65	0.97	0.11	0.53	0.95	n/a	n/a	n/a	n/a	n/a	n/a	n/a	n/a	n/a	n/a	n/a	n/a
chr11:53100477:53100361|53100355:-@chr11:53097602:53097701:-	ENSMUSG00000020361	AK038627,Hspa4	heat shock protein 4, full insert sequence.,Mus musculus adult male hypothalamus cDNA, clone:A230051H13 product:heat shock 70 kDa protein 4, RIKEN full-length enriched library	n/a	n/a	n/a	n/a	n/a	n/a	n/a	0.84	0.94	0.99	0.86	0.96	1	0.78	0.94	1	0.91	0.97	1	0.81	0.93	0.99	0.88	0.96	1	0.83	0.95	0.99	0.94	0.98	1	0.92	0.97	1	0.97	0.99	1	0.84	0.95	0.99	0.85	0.95	1	0.82	0.94	0.99
chr10:128349217:128349357:+@chr10:128349493|128349494:128349577:+	ENSMUSG00000025351	Cd63	Cd63 antigen	n/a	n/a	n/a	n/a	n/a	n/a	n/a	0	0.01	0.03	0	0.01	0.04	0	0.01	0.04	0	0.01	0.05	0	0.03	0.08	0	0.03	0.07	0	0.01	0.03	0	0.01	0.02	0	0.02	0.06	0	0.01	0.03	0	0.01	0.04	0	0.03	0.08	0	0.03	0.08
chr3:87572800:87572893:-@chr3:87567147:87567280:-@chr3:87566134:87566203:-	ENSMUSG00000028073	3110045G13Rik,Megf12	complete cds.,Mus musculus MEGF12 (Megf12) mRNA,platelet endothelial aggregation receptor 1	1	0.585859	9.40987	0.54	0.56	0.02	0.0440114	0.19	0.56	0.98	0.32	0.59	0.86	0.13	0.47	0.81	0.11	0.44	0.89	0.02	0.44	0.91	0.34	0.7	0.97	0.22	0.55	0.89	0.19	0.6	0.91	0.11	0.37	0.74	0.01	0.08	0.23	0.06	0.17	0.37	0.36	0.7	0.93	0.05	0.25	0.68
chr17:49615773:49615880:-@chr17:49613434:49613577:-@chr17:49612611:49612717:-	ENSMUSG00000040260	Daam2	dishevelled associated activator of, clone:A330064F11 product:Disheveled associated activator of morphogenesis 2 homolog [Mus musculus], full insert sequence.,Mus musculus adult male spinal cord cDNA, RIKEN full-length enriched library	n/a	n/a	n/a	n/a	n/a	n/a	n/a	0.02	0.27	0.81	0.01	0.11	0.42	0.04	0.33	0.69	0.01	0.16	0.64	0.03	0.25	0.65	0.03	0.15	0.37	0.01	0.3	0.85	0.04	0.29	0.66	0.03	0.28	0.72	0.03	0.24	0.59	0.01	0.4	0.95	0.01	0.2	0.57	0.02	0.18	0.54
chr11:101108237:101108458:+@chr11:101108885|101108900:101109002:+	ENSMUSG00000001240	Ramp2	Mus musculus receptor activity modifying protein 2 (Ramp2) mRNA, complete cds.,receptor activity modifying protein 2	n/a	n/a	n/a	n/a	n/a	n/a	n/a	0.01	0.05	0.1	0	0.02	0.06	0.01	0.04	0.12	0	0.06	0.17	0.01	0.12	0.35	0	0.04	0.16	0	0.03	0.11	0.01	0.06	0.16	0.04	0.15	0.36	0.01	0.1	0.27	0	0.04	0.1	0	0.06	0.2	0.05	0.17	0.35
chr8:26677183:26677385|26677379:+@chr8:26678660:26678805:+	ENSMUSG00000031565	Fgfr1	Mus musculus fibroblast growth factor receptor 1-IIIb mRNA, complete cds.,fibroblast growth factor receptor 1 isoform 3	n/a	n/a	n/a	n/a	n/a	n/a	n/a	0.65	0.9	1	0.52	0.83	0.98	0.36	0.78	0.96	0.41	0.75	0.98	0.45	0.84	0.98	0.35	0.71	0.98	0.63	0.89	0.99	0.74	0.91	0.99	0.75	0.92	1	0.69	0.89	0.99	0.35	0.71	0.96	0.52	0.8	0.96	0.27	0.79	0.99
chr14:73576802:73576941:+@chr14:73578240:73578370:+@chr14:73582266:73584025:+	ENSMUSG00000022106	Rcbtb2	RCC1 and BTB domain-containing protein 2 (Regulator of chromosome condensation and BTB domain-containing protein 2) (Chromosome condensation 1-like)., RIKEN full-length enriched library,chromosome condensation 1-like, clone:2900016J09 product:SIMILAR TO CHROMOSOME CONDENSATION 1-LIKE homolog [Mus musculus], full insert sequence.,Mus musculus adult male hippocampus cDNA	n/a	n/a	n/a	n/a	n/a	n/a	n/a	0.86	0.96	1	0.81	0.94	1	0.7	0.88	0.99	0.81	0.95	1	0.7	0.9	0.99	0.94	0.98	1	0.88	0.96	1	0.89	0.97	1	0.76	0.91	0.99	0.69	0.91	1	0.65	0.88	0.99	0.76	0.92	0.99	0.8	0.94	0.99
chr3:65760775:65760884:-@chr3:65759126:65759198:-@chr3:65752814:65755476:-	ENSMUSG00000027829	Ccnl1,Ccn1	cyclin L1, complete cds.,Mus musculus cyclin ania-6a mRNA,Cyclin-L1 (Cyclin-L) (Cyclin Ania-6a).	4	0.313131	5.0884	0.85	0.9	0.05	0.724563	0.72	0.9	1	0.59	0.79	0.94	0.67	0.86	0.99	0.34	0.77	0.99	0.34	0.71	0.99	0.62	0.84	0.99	0.59	0.8	0.95	0.77	0.89	0.97	0.76	0.93	1	0.39	0.57	0.72	0.58	0.82	0.96	0.57	0.79	0.95	0.53	0.82	0.99
chr5:145903017:145903436:+@chr5:145905768:145905890:+@chr5:145907312:145907478:+	ENSMUSG00000038722	Bud31	maternal G10 transcript, containing frame-shift errors.,Mus musculus cDNA clone IMAGE:3594956	n/a	n/a	n/a	n/a	n/a	n/a	n/a	0.9	0.96	0.99	0.91	0.97	1	0.9	0.97	1	0.8	0.89	0.96	0.77	0.89	0.97	0.89	0.97	1	0.9	0.95	0.98	0.93	0.97	1	0.91	0.96	0.99	0.89	0.95	0.99	0.93	0.97	0.99	0.88	0.94	0.97	0.87	0.94	0.99
chr17:24836489:24836960|24836602:+@chr17:24837066:24837731:+	ENSMUSG00000019320	Noxo1,Snx28	Mus musculus SNX28 (Snx28) mRNA,NADPH oxidase organizer 1, complete cds.	n/a	n/a	n/a	n/a	n/a	n/a	n/a	0.01	0.09	0.29	0.03	0.19	0.49	0.15	0.48	0.81	0.07	0.17	0.32	0.05	0.27	0.58	0.19	0.41	0.72	0.37	0.66	0.94	0.01	0.07	0.21	n/a	n/a	n/a	0.02	0.32	0.94	0.21	0.56	0.97	0.08	0.36	0.88	0.18	0.62	0.94
chr7:52382579:52382644:-@chr7:52382361:52382462:-@chr7:52381848:52381907:-	ENSMUSG00000003426	Rpl13a	Mus musculus 10 day old male pancreas cDNA, clone:1810026N22 product:ribosomal protein L13a, full insert sequence.,ribosomal protein L13a, RIKEN full-length enriched library	n/a	n/a	n/a	n/a	n/a	n/a	n/a	0.99	1	1	0.99	1	1	0.99	1	1	0.99	1	1	0.97	0.99	1	0.98	0.99	1	0.98	0.99	1	1	1	1	1	1	1	1	1	1	0.99	1	1	0.97	0.99	1	0.99	1	1
chr2:127954356:127954750|127954492:+@chr2:127972821:127972930:+	ENSMUSG00000027381	Bcl2l11	BCL2-like 11 apoptosis facilitator isoform 2,BCL2-like 11 apoptosis facilitator isoform 3,BCL2-like 11 apoptosis facilitator isoform 1	-2	-0.010101	1.49406	0.81	0.69	-0.13	-1.33187	0.59	0.84	0.98	0.44	0.74	0.97	0.62	0.86	0.98	0.26	0.46	0.68	0.24	0.62	0.93	0.52	0.73	0.93	0.59	0.82	0.96	0.36	0.54	0.76	0.32	0.6	0.93	0.57	0.8	0.95	0.3	0.69	0.93	0.43	0.76	1	0.35	0.69	0.93
chr2:120689030:120689154:+@chr2:120689476:120689580:+@chr2:120692066:120692425:+	n/a	n/a	n/a	n/a	n/a	n/a	n/a	n/a	n/a	n/a	0.05	0.32	0.8	0	0.15	0.49	0.01	0.24	0.91	0	0.26	0.77	0.03	0.42	0.94	0.03	0.23	0.59	0.01	0.16	0.53	0.01	0.13	0.49	0.03	0.27	0.7	0.01	0.11	0.52	0.01	0.32	0.82	0.03	0.27	0.62	0.03	0.21	0.52
chr18:34764252:34764320:-@chr18:34763361:34763538:-@chr18:34763296:34763330:-@chr18:34762326:34762430:-	ENSMUSG00000003778	Brd8	clone:2610007E11 product:unclassifiable,Mus musculus 10 days embryo whole body cDNA, full insert sequence.,bromodomain containing 8, RIKEN full-length enriched library	n/a	n/a	n/a	n/a	n/a	n/a	n/a	0.56	0.77	0.94	0.69	0.88	0.98	0.61	0.86	0.99	0.43	0.69	0.91	0.45	0.74	0.95	0.76	0.91	0.99	0.9	0.97	1	0.63	0.84	0.96	0.45	0.72	0.98	0.74	0.91	0.99	0.36	0.66	0.91	0.75	0.92	0.99	0.74	0.91	0.98
chr9:21527927:21528288:+@chr9:21536191|21536194:21536313:+	ENSMUSG00000032193	Ldlr	low density lipoprotein receptor	n/a	n/a	n/a	n/a	n/a	n/a	n/a	n/a	n/a	n/a	n/a	n/a	n/a	0.21	0.63	0.95	n/a	n/a	n/a	n/a	n/a	n/a	n/a	n/a	n/a	0.08	0.42	0.84	0.07	0.56	0.98	n/a	n/a	n/a	0.03	0.38	0.97	0.03	0.39	0.85	n/a	n/a	n/a	n/a	n/a	n/a
chr2:155937522:155937705:-@chr2:155929133|155929165:155929085:-	ENSMUSG00000038171	Rbm12,Cpne1	copine I,RNA binding motif protein 12	-2	-0.141414	4.68397	0.81	0.75	-0.06	-0.396797	0.51	0.84	1	0.45	0.77	0.97	0.56	0.82	0.99	0.82	0.94	0.99	0.55	0.83	0.98	0.82	0.94	0.99	0.45	0.67	0.88	0.88	0.95	1	0.45	0.71	0.89	0.56	0.73	0.89	0.64	0.85	0.97	0.42	0.83	1	0.15	0.55	0.95
chr6:125078810:125079008|125079005:+@chr6:125079838:125080609:+	ENSMUSG00000063870	Chd4	chromodomain helicase DNA binding protein 4	n/a	n/a	n/a	n/a	n/a	n/a	n/a	0	0.02	0.07	0	0.02	0.06	0	0.04	0.11	0	0.03	0.09	0	0.06	0.22	0.01	0.08	0.29	0	0.04	0.12	0.01	0.04	0.11	0	0.02	0.06	0	0.03	0.11	0	0.01	0.05	0	0.02	0.07	0	0.06	0.17
chr4:145373924:145374016:+@chr4:145404670:145404715:+@chr4:145415112:145415169:+	n/a	n/a	n/a	-4	0.171717	7.11669	0.79	0.78	-0.01	-0.586188	0.5	0.82	1	0.84	0.94	0.99	0.28	0.62	0.91	0.52	0.85	1	0.64	0.88	1	0.51	0.81	0.99	0.52	0.8	0.98	0.67	0.85	0.96	0.76	0.91	1	0.34	0.48	0.66	0.26	0.58	0.88	0.54	0.78	1	0.46	0.81	0.99
chrX:7780285:7780415:-@chrX:7778784:7778798:-@chrX:7778570:7778695:-	ENSMUSG00000031169	Porcn,Mporc-b	complete cds.,Mus musculus Mporc-b mRNA for porcupine-B,porcupine homolog isoform Mporc-a	n/a	n/a	n/a	n/a	n/a	n/a	n/a	0.19	0.51	0.87	0.03	0.34	0.76	n/a	n/a	n/a	n/a	n/a	n/a	n/a	n/a	n/a	0.2	0.64	0.97	0.08	0.52	0.97	0.45	0.8	0.99	0.43	0.76	0.97	0.03	0.42	0.92	n/a	n/a	n/a	n/a	n/a	n/a	n/a	n/a	n/a
chr17:24388240:24388355:-@chr17:24386337|24386350:24386196:-	n/a	na/a	n/a	n/a	n/a	n/a	n/a	n/a	n/a	n/a	n/a	n/a	n/a	n/a	n/a	n/a	n/a	n/a	n/a	n/a	n/a	n/a	n/a	n/a	n/a	n/a	n/a	n/a	n/a	n/a	n/a	n/a	n/a	n/a	n/a	n/a	n/a	0.65	0.91	0.99	n/a	n/a	n/a	n/a	n/a	n/a	n/a	n/a	n/a
chr12:56271862:56271966:+@chr12:56273156:56273222:+@chr12:56273303:56273360:+	ENSMUSG00000079108	Srp54a,Srp54b	signal recognition particle 54b,signal recognition particle 54a	n/a	n/a	n/a	n/a	n/a	n/a	n/a	0.96	0.98	1	0.87	0.95	0.99	0.89	0.96	0.99	0.97	0.99	1	0.93	0.98	1	0.98	0.99	1	0.96	0.99	1	0.85	0.94	0.99	0.99	1	1	0.98	0.99	1	0.91	0.97	1	0.97	0.99	1	0.98	0.99	1
chr11:70833099:70833691:+@chr11:70838060:70838213:+@chr11:70838612:70840880:+	n/a	n/a	n/a	-7	0.787879	12.6772	0.8	0.59	-0.21	-0.614319	0.39	0.73	0.97	0.62	0.83	0.96	0.61	0.83	0.97	0.55	0.81	0.98	0.37	0.67	0.95	0.15	0.41	0.76	0.54	0.78	0.99	0.31	0.55	0.85	0.81	0.94	1	0.72	0.9	0.99	0.8	0.93	1	0.44	0.75	0.98	0.72	0.91	0.99
chr13:91293822:91293917:-@chr13:91284961:91285053:-@chr13:91180334:91180593:-	ENSMUSG00000021619	Atg10	autophagy-related 10-like	n/a	n/a	n/a	n/a	n/a	n/a	n/a	0.01	0.06	0.15	0	0.06	0.19	0.01	0.11	0.37	0.01	0.05	0.15	0.01	0.08	0.26	0	0.05	0.17	0.01	0.03	0.09	0.01	0.04	0.12	0	0.03	0.09	0	0.02	0.09	0.04	0.28	0.81	0	0.07	0.25	0.01	0.19	0.77
chr17:30357455:30357515:-@chr17:30352469:30357089:-	n/a	n/a	n/a	n/a	n/a	n/a	n/a	n/a	n/a	n/a	0.85	0.94	0.99	0.85	0.95	1	0.83	0.94	0.99	0.65	0.82	0.97	0.7	0.89	1	0.75	0.9	0.99	0.75	0.9	1	0.87	0.96	1	0.41	0.66	0.95	0.64	0.82	0.94	0.8	0.92	0.98	0.57	0.79	0.96	0.75	0.93	0.99
chr17:28465912:28466225|28465991:+@chr17:28466319:28466467:+	ENSMUSG00000037805	Rpl10a	full insert sequence.,Mus musculus adult male kidney cDNA, RIKEN full-length enriched library, clone:0610012K10 product:ribosomal protein L10A,ribosomal protein L10A	42	-1.89899	24.7164	0.04	0.06	0.01	1.77611	0.02	0.03	0.04	0.05	0.06	0.08	0.03	0.04	0.06	0.02	0.03	0.04	0	0.01	0.01	0.02	0.03	0.04	0.03	0.04	0.05	0.03	0.03	0.04	0	0.01	0.02	0.01	0.02	0.03	0.09	0.11	0.13	0.1	0.12	0.16	0.09	0.12	0.15
chr11:120829448:120829402|120829309:-@chr11:120823055:120825220:-	ENSMUSG00000025162	Csnk1d	delta isoform 2,casein kinase 1, delta isoform 1	n/a	n/a	n/a	n/a	n/a	n/a	n/a	0.89	0.96	1	0.93	0.98	1	0.92	0.97	1	0.61	0.82	0.99	0.72	0.9	0.98	0.84	0.94	0.99	0.88	0.95	0.99	0.94	0.98	1	0.97	0.99	1	0.97	0.99	1	0.9	0.97	1	0.83	0.94	0.99	0.81	0.94	1
chr9:21737248:21737434:+@chr9:21737990:21738057:+@chr9:21738140:21738216:+	ENSMUSG00000006241	2510048L02Rik	full insert sequence., RIKEN full-length enriched library, clone:2510048L02 product:hypothetical ATP/GTP-binding site motif A (P-loop) containing protein,hypothetical protein LOC67119,Mus musculus 13 days embryo liver cDNA	n/a	n/a	n/a	n/a	n/a	n/a	n/a	0.5	0.78	0.97	0.44	0.78	0.98	0.63	0.83	0.99	0.21	0.58	0.94	n/a	n/a	n/a	0.22	0.58	0.97	0.62	0.86	1	0.63	0.9	1	0.36	0.7	0.94	0.58	0.86	0.98	0.63	0.89	0.99	0.43	0.77	0.97	0.29	0.64	0.92
chr18:38610964:38611296:+@chr18:38611959:38612025:+@chr18:38615709:38615775:+	ENSMUSG00000024425	Ndfip1	Nedd4 family interacting protein 1	n/a	n/a	n/a	n/a	n/a	n/a	n/a	0.92	0.98	1	0.9	0.97	1	0.9	0.96	0.99	0.96	0.99	1	0.9	0.97	1	0.93	0.98	1	0.94	0.98	1	0.96	0.99	1	0.92	0.97	1	0.93	0.98	1	0.92	0.98	1	0.88	0.96	1	0.86	0.95	0.99
chr17:79451245:79451728:+@chr17:79463268:79463414:+@chr17:79470013:79470291:+	ENSMUSG00000024084	Qpct	glutaminyl-peptide cyclotransferase (glutaminyl	-13	-1	11.2976	0.87	0.69	-0.17	-1.06217	0.63	0.86	1	0.65	0.86	1	0.65	0.88	0.98	0.74	0.91	0.99	0.69	0.88	0.99	0.46	0.82	0.99	0.31	0.57	0.83	0.59	0.87	0.99	0.65	0.85	0.99	0.65	0.85	0.98	0.6	0.86	0.98	0.59	0.87	1	0.28	0.71	0.99
chr6:124767336:124767489:-@chr6:124767002:124767086:-@chr6:124765033:124765677:-	ENSMUSG00000038429	Usp5	ubiquitin specific protease 5 (isopeptidase T)	-11	0.626263	10.7765	0.95	0.94	-0.01	-1.07885	0.87	0.95	0.99	0.85	0.95	1	0.86	0.96	1	0.94	0.99	1	0.85	0.95	0.99	0.94	0.98	1	0.91	0.97	1	0.93	0.98	1	0.93	0.97	1	0.91	0.96	0.99	0.57	0.69	0.81	0.71	0.83	0.93	0.82	0.95	1
chr2:164659973:164660424:+@chr2:164660656:164660811:+@chr2:164661130:164661221:+	ENSMUSG00000017760	Ctsa	cathepsin A isoform b,cathepsin A isoform a	n/a	n/a	n/a	n/a	n/a	n/a	n/a	0.99	1	1	0.98	0.99	1	0.98	0.99	1	0.98	0.99	1	0.97	0.99	1	0.98	0.99	1	0.98	0.99	1	0.98	1	1	0.98	1	1	0.98	1	1	0.98	0.99	1	0.98	0.99	1	0.98	0.99	1
chr6:24472659:24472866:-@chr6:24469254|24469257:24469192:-	ENSMUSG00000023089	Ndufa5	NADH dehydrogenase (ubiquinone) 1 alpha	n/a	n/a	n/a	n/a	n/a	n/a	n/a	0.99	1	1	0.99	1	1	0.99	1	1	0.99	1	1	0.99	1	1	0.99	1	1	1	1	1	1	1	1	0.99	1	1	1	1	1	0.99	1	1	0.99	1	1	0.99	1	1
chr9:59523375:59523541|59523540:+@chr9:59525851:59526519:+	ENSMUSG00000032294	Pkm2	clone:C530045D03 product:pyruvate kinase 3, RIKEN full-length enriched library,Mus musculus 12 days embryo spinal cord cDNA, full insert sequence.,pyruvate kinase, muscle	n/a	n/a	n/a	n/a	n/a	n/a	n/a	0.99	1	1	0.99	1	1	0.99	1	1	0.98	0.99	1	0.95	0.99	1	0.98	0.99	1	0.99	1	1	0.99	1	1	0.99	1	1	0.99	1	1	0.99	1	1	0.96	0.99	1	0.96	0.99	1
chr1:39048091:39048220:+@chr1:39051760:39051850:+@chr1:39052090:39052233:+	ENSMUSG00000026078	Pdcl3	phosducin-like 3	n/a	n/a	n/a	n/a	n/a	n/a	n/a	0.94	0.98	1	0.94	0.98	1	0.93	0.98	1	0.96	0.99	1	0.87	0.95	1	0.91	0.97	1	0.94	0.98	0.99	0.98	0.99	1	0.98	0.99	1	0.98	1	1	0.92	0.98	1	0.76	0.9	0.99	0.86	0.96	1
chr5:100391534:100391631:-@chr5:100391117:100391223:-@chr5:100384954:100390352:-	ENSMUSG00000000568	Hnrpd	heterogeneous nuclear ribonucleoprotein D	19	1.16162	10.7061	0.35	0.35	0	1.66619	0.16	0.36	0.62	0.19	0.41	0.66	0.11	0.27	0.46	0.07	0.17	0.3	0.03	0.15	0.4	0.14	0.28	0.42	0.1	0.17	0.26	0.22	0.37	0.54	0.19	0.31	0.45	0.18	0.29	0.43	0.43	0.6	0.76	0.43	0.59	0.73	0.21	0.38	0.58
chr11:32122169:32122300:-@chr11:32116282|32116347:32116142:-	ENSMUSG00000020282	Rhbdf1	rhomboid family 1	n/a	n/a	n/a	n/a	n/a	n/a	n/a	0.02	0.1	0.3	0	0.1	0.34	0.04	0.15	0.31	0.03	0.25	0.8	0.03	0.43	0.95	0.02	0.27	0.65	0.05	0.23	0.59	0	0.11	0.36	0.05	0.33	0.75	0.06	0.37	0.79	0.01	0.08	0.27	0.12	0.46	0.9	0.01	0.18	0.64
chr16:32419784:32420013:+@chr16:32422906:32423039:+@chr16:32425327:32427007:+	ENSMUSG00000014075	0610012D17Rik	full insert sequence (18-day embryo whole body cDNA,ES cells cDNA, clone:2410011K15 product:hypothetical protein, clone:1110046M15 product:hypothetical protein, RIKEN full-length enriched library	n/a	n/a	n/a	n/a	n/a	n/a	n/a	0.91	0.98	1	0.9	0.97	1	0.84	0.96	1	0.88	0.96	1	0.77	0.92	0.99	0.83	0.95	0.99	0.89	0.97	1	0.91	0.97	1	0.9	0.97	1	0.88	0.96	0.99	0.89	0.96	1	0.72	0.92	0.99	0.63	0.87	0.99
chr16:87490910:87490733|87490730:-@chr16:87490566:87490627:-	ENSMUSG00000025613	Cct8	chaperonin subunit 8 (theta)	n/a	n/a	n/a	n/a	n/a	n/a	n/a	0.93	0.98	1	0.94	0.98	1	0.93	0.98	1	0.97	0.99	1	0.86	0.96	1	0.96	0.99	1	0.96	0.99	1	0.92	0.98	1	0.95	0.98	1	0.95	0.98	1	0.93	0.98	1	0.88	0.96	1	0.89	0.97	1
chr2:151561210:151561362:-@chr2:151559958:151560040:-@chr2:151553182:151555412:-	ENSMUSG00000032869	Psmf1	clone:6030413I21 product:similar to PROTEASOME INHIBITOR PI31 SUBUNIT (HPI31) [Homo sapiens], full insert sequence.,Mus musculus 13 days embryo male testis cDNA,proteasome inhibitor subunit 1 isoform a, RIKEN full-length enriched library	7	0.454545	5.73184	0.94	0.97	0.03	1.14195	0.86	0.94	0.99	0.86	0.96	1	0.79	0.91	0.98	0.88	0.96	1	0.53	0.73	0.89	0.83	0.95	1	0.88	0.95	0.99	0.86	0.95	0.99	0.92	0.97	1	0.93	0.98	1	0.89	0.97	1	0.92	0.97	1	0.79	0.93	0.99
chr6:50294873:50295063:-@chr6:50286328|50286344:50286214:-	ENSMUSG00000029822	Osbpl3	Mus musculus adult male lung cDNA, full insert sequence., clone:1200014M06 product:oxysterol binding protein-like 3,oxysterol-binding protein-like protein 3, RIKEN full-length enriched library	-11	0.636364	9.11593	0.86	0.45	-0.4	-1.27649	0.46	0.77	0.98	0.65	0.87	0.99	0.74	0.93	1	0.32	0.65	0.96	0.04	0.26	0.63	0.56	0.83	0.98	0.37	0.67	0.89	0.73	0.9	0.99	0.43	0.78	0.98	0.7	0.91	0.99	0.43	0.73	0.96	0.55	0.82	0.95	0.27	0.7	0.95
chr12:112117895:112118024:-@chr12:112117198:112117249:-@chr12:112115433:112115582:-	ENSMUSG00000021276	2810452K22Rik	HIGHLY SIMILAR TO HOMO SAPIENS FROM HELA CYCLIN-DEPENDENT KINASE 2 INTERACTING PROTEIN (CINP) MRNA)., CLONE NT2RI2001054, RIKEN full-length enriched library, clone:1810047K05 product:similar to FROM HELA CYCLIN-DEPENDENT KINASE 2 INTERACTING PROTEIN (CDNA FLJ31550 FIS, clone:6430403F18 product:RIKEN cDNA 1810047K05.,Adult male olfactory brain cDNA,10 day old male pancreas cDNA	9	1.0404	7.19837	0.17	0.36	0.19	1.10575	0.03	0.21	0.59	0.01	0.16	0.46	0.01	0.15	0.47	0.01	0.2	0.53	0.01	0.19	0.63	0.1	0.41	0.94	0.12	0.35	0.64	0.02	0.1	0.24	0.13	0.49	0.93	0	0.23	0.69	0.01	0.14	0.46	0.1	0.37	0.81	0.01	0.29	0.92
chr14:52624163:52624417:+@chr14:52624554|52624664:52624710:+	ENSMUSG00000004562	E130112L23Rik	hypothetical protein LOC268739	-6	-0.606061	13.72	0.29	0.3	0.02	-0.393144	0.12	0.27	0.44	0.2	0.37	0.58	0.08	0.22	0.41	0.22	0.33	0.46	0.22	0.43	0.69	0.2	0.33	0.48	0.01	0.08	0.22	0.42	0.71	0.93	0.56	0.77	0.93	0.47	0.66	0.83	0.12	0.26	0.46	0.18	0.45	0.76	0.14	0.48	0.86
chr11:69734665:69734890:-@chr11:69733843:69733924:-@chr11:69732653:69732838:-	ENSMUSG00000078812	n/a	n/a	1	-0.20202	1.4563	0.05	0.04	-0.01	0.825394	0.02	0.05	0.07	0.03	0.05	0.07	0.04	0.06	0.08	0.01	0.03	0.04	0.03	0.05	0.09	0.02	0.04	0.06	0.02	0.03	0.05	0.03	0.04	0.06	0.04	0.06	0.08	0.05	0.08	0.1	0.04	0.06	0.09	0.04	0.08	0.13	0.01	0.03	0.06
chr19:7071186:7071267:+@chr19:7072423:7072592:+@chr19:7072682:7072856:+	ENSMUSG00000047656	Trpt1	tRNA splicing 2' phosphotransferase 1, full insert sequence., clone:A230066G02 product:hypothetical Domain of unknown function DUF60 containing protein,Mus musculus adult male hypothalamus cDNA, RIKEN full-length enriched library	-2	1.70707	7.25892	0.82	0.79	-0.03	-0.510692	0.66	0.82	0.94	0.78	0.92	1	0.6	0.73	0.87	0.67	0.83	0.97	0.6	0.82	0.96	0.71	0.85	0.95	0.6	0.75	0.9	0.66	0.8	0.91	0.61	0.78	0.93	0.6	0.74	0.87	0.55	0.77	0.94	0.74	0.92	0.99	0.48	0.77	0.96
chr5:110564954:110565213:+@chr5:110569373:110569478:+@chr5:110572570:110572679:+	ENSMUSG00000014668	Chfr	checkpoint with forkhead and ring finger,16 days embryo kidney cDNA, clone:I920088D14 product:Ubiquitin ligase protein CHFR (EC 6.3.2.-) (Checkpoint with forkhead and RING finger domains protein) homolog., RIKEN full-length enriched library	-1	-0.040404	0.920246	0.66	0.69	0.03	-1.04276	0.21	0.61	0.91	0.41	0.75	0.98	0.32	0.61	0.86	0.3	0.73	0.97	0.29	0.72	0.98	0.36	0.74	0.96	0.36	0.64	0.86	0.56	0.79	0.95	0.43	0.74	0.96	0.56	0.81	0.97	0.28	0.61	1	0.34	0.67	0.95	0.44	0.83	0.98
chr4:149615031:149615249:+@chr4:149616231:149616289:+@chr4:149618114:149618183:+	ENSMUSG00000063524	EG433182	hypothetical protein LOC433182	n/a	n/a	n/a	n/a	n/a	n/a	n/a	0.55	0.84	0.99	0.33	0.69	0.98	0.55	0.88	1	0.84	0.96	1	0.44	0.75	0.95	0.87	0.97	1	0.38	0.69	0.98	0.47	0.79	0.98	0.32	0.67	0.94	0.5	0.81	0.98	0.84	0.95	1	0.61	0.88	0.99	0.69	0.89	0.99
chr18:67663085:67663227:-@chr18:67660722:67660895:-@chr18:67656807:67656968:-	ENSMUSG00000024533	AK053505,Spire1	MKIAA1135 protein (Fragment)., RIKEN full-length enriched library,Spir-1 protein isoform 1, full insert sequence., clone:E130103J24 product:unclassifiable,Mus musculus 0 day neonate eyeball cDNA	n/a	n/a	n/a	n/a	n/a	n/a	n/a	0.04	0.3	0.82	0.02	0.14	0.39	0.01	0.11	0.42	n/a	n/a	n/a	n/a	n/a	n/a	0.01	0.13	0.47	0.01	0.1	0.37	0.02	0.13	0.39	0.01	0.12	0.39	n/a	n/a	n/a	0.02	0.19	0.6	n/a	n/a	n/a	n/a	n/a	n/a
chr11:40501103:40501297:-@chr11:40498815|40498843:40498729:-	ENSMUSG00000042032	Mat2b	methionine adenosyltransferase II	n/a	n/a	n/a	n/a	n/a	n/a	n/a	0.92	0.97	1	0.91	0.97	1	0.86	0.96	1	0.96	0.99	1	0.91	0.97	1	0.92	0.98	1	0.87	0.96	1	0.93	0.98	1	0.73	0.92	1	0.68	0.87	0.97	0.83	0.94	1	0.85	0.95	1	0.82	0.95	0.99
chr14:21598426:21598485:-@chr14:21590229:21590283:-@chr14:21589286:21589351:-	ENSMUSG00000021820	Camk2g	calcium/calmodulin-dependent protein kinase II	-7	1.61616	6.96848	0.93	0.82	-0.11	-1.23645	0.82	0.94	1	0.75	0.91	0.99	0.78	0.93	1	0.71	0.91	1	0.57	0.87	0.99	0.63	0.86	0.98	0.59	0.78	0.98	0.82	0.94	0.99	0.59	0.8	0.98	0.71	0.9	0.99	0.63	0.84	0.96	0.63	0.85	0.98	0.66	0.87	1
chr1:157882888:157883687:-@chr1:157880930|157880969:157880856:-	ENSMUSG00000026466	Lap1B,Tor1aip1	Mus musculus Lap1B mRNA for lamina-associated polypeptide 1B, complete cds.,torsin A interacting protein 1	n/a	n/a	n/a	n/a	n/a	n/a	n/a	0	0.03	0.08	0	0.03	0.13	0	0.02	0.07	0	0.05	0.15	0	0.14	0.47	0	0.05	0.17	0	0.02	0.07	0	0.03	0.08	0.01	0.08	0.26	0	0.04	0.13	0	0.02	0.05	0	0.05	0.15	0.01	0.07	0.21
chr17:56158739:56158882:-@chr17:56158463:56158596:-	n/a	n/a	n/a	1	-0.515152	2.4878	0.04	0.05	0.01	0.609032	0.01	0.05	0.12	0	0.03	0.1	0	0.04	0.12	0.04	0.11	0.21	0	0.04	0.14	0.01	0.09	0.22	0.02	0.06	0.14	0.02	0.07	0.13	0.01	0.04	0.08	0	0.01	0.04	0.02	0.07	0.14	0.01	0.05	0.1	0.08	0.18	0.31
chr5:130476627:130476812:-@chr5:130476231:130476412:-@chr5:130474529:130475939:-	ENSMUSG00000025534	Gusb	clone:0610039G03 product:beta-glucuronidase structural,Gusb protein., beta,Mus musculus adult male kidney cDNA, RIKEN full-length enriched library,glucuronidase, full insert sequence.	n/a	n/a	n/a	n/a	n/a	n/a	n/a	0.84	0.94	0.99	0.87	0.96	1	0.76	0.9	0.99	0.79	0.93	1	0.83	0.94	0.99	0.94	0.98	1	0.89	0.95	0.99	0.9	0.96	1	0.87	0.96	1	0.86	0.95	0.99	0.85	0.94	0.99	0.75	0.89	0.97	0.75	0.9	0.98
chr11:119970746:119970850:-@chr11:119969781:119969804:-@chr11:119967748:119967924:-	ENSMUSG00000061306	1810073N04Rik	hypothetical protein LOC72055	-53	-2.35354	16.7726	0.54	0.15	-0.39	-3.0196	0.25	0.38	0.53	0.5	0.65	0.79	0.45	0.59	0.74	0.3	0.48	0.67	0.39	0.65	0.88	0.13	0.28	0.47	0.15	0.22	0.3	0.19	0.25	0.31	0.5	0.59	0.69	0.45	0.55	0.64	0.27	0.41	0.54	0.33	0.52	0.75	0.12	0.27	0.45
chr14:73951965:73952704:+@chr14:73960248:73960428:+@chr14:73968441:73968540:+	ENSMUSG00000022110	Sucla2	full insert sequence., ADP-forming, RIKEN full-length enriched library,Mus musculus adult male cerebellum cDNA, beta, clone:1500017C15 product:succinate-Coenzyme A ligase,succinate-Coenzyme A ligase, beta subunit	n/a	n/a	n/a	n/a	n/a	n/a	n/a	1	1	1	0.99	1	1	0.99	1	1	1	1	1	0.99	1	1	0.99	1	1	1	1	1	1	1	1	0.96	0.99	1	0.99	1	1	1	1	1	0.99	1	1	0.99	1	1
chr15:76877461:76877561:+@chr15:76881037|76881092:76881835:+	ENSMUSG00000033576	Apol6,BC113126,AK144563	Adult male tongue cDNA, RIKEN full-length enriched library,Mus musculus adult male tongue cDNA, full insert sequence., clone:2310076O14 product:hypothetical Bacterial regulatory protein, LysR family containing protein	n/a	n/a	n/a	n/a	n/a	n/a	n/a	0.2	0.67	0.96	0.09	0.54	0.87	0.01	0.37	0.92	0.16	0.62	0.92	0.04	0.42	0.97	0.35	0.78	0.97	0.33	0.71	0.96	0.07	0.4	0.82	0.11	0.61	0.99	0.06	0.6	0.93	0.07	0.54	0.91	0.05	0.48	0.95	n/a	n/a	n/a
chr1:193940150:193940227:-@chr1:193932525:193932582:-@chr1:193925264:193925748:-	ENSMUSG00000037395	Rcor3	Mus musculus adult male aorta and vein cDNA, RIKEN full-length enriched library,REST corepressor 3, full insert sequence.,REST corepressor 3., clone:A530029L01 product:weakly similar to RE1-silencing transcription factor (Rcor protein) [Mus musculus]	21	-1.82828	12.2582	0.66	0.78	0.12	1.86229	0.44	0.7	0.89	0.4	0.66	0.89	0.39	0.62	0.81	0.08	0.25	0.5	0.27	0.55	0.86	0.16	0.35	0.57	0.49	0.72	0.9	0.5	0.76	0.95	0.44	0.68	0.89	0.61	0.81	0.96	0.11	0.38	0.66	0.53	0.82	0.98	0.59	0.84	0.99
chr2:50151772:50152216:-@chr2:50148418|50148433:50148329:-	n/a	n/a	n/a	2	-0.212121	1.45139	0.94	0.8	-0.14	1.52414	0.79	0.96	1	0.77	0.93	1	0.78	0.93	1	0.16	0.52	0.85	0.35	0.78	0.98	0.67	0.91	1	0.6	0.87	1	0.75	0.94	1	0.89	0.97	1	0.96	0.99	1	0.72	0.89	0.98	0.2	0.66	0.94	0.43	0.78	0.98
chr17:29497858:29498102:+@chr17:29500656:29500887:+@chr17:29501856:29502226:+	ENSMUSG00000024013	Fgd2	FYVE, RhoGEF and PH domain-containing protein 2., RhoGEF and PH domain containing 2	n/a	n/a	n/a	n/a	n/a	n/a	n/a	n/a	n/a	n/a	n/a	n/a	n/a	n/a	n/a	n/a	n/a	n/a	n/a	n/a	n/a	n/a	n/a	n/a	n/a	n/a	n/a	n/a	n/a	n/a	n/a	n/a	n/a	n/a	0.17	0.63	1	n/a	n/a	n/a	n/a	n/a	n/a	n/a	n/a	n/a
chr4:11280442:11282356:-@chr4:11265869:11265978:-@chr4:11259080:11260620:-	ENSMUSG00000040728	n/a	n/a	n/a	n/a	n/a	n/a	n/a	n/a	n/a	n/a	n/a	n/a	n/a	n/a	n/a	n/a	n/a	n/a	n/a	n/a	n/a	n/a	n/a	n/a	n/a	n/a	n/a	n/a	n/a	n/a	n/a	n/a	n/a	n/a	n/a	n/a	n/a	n/a	n/a	n/a	n/a	n/a	n/a	n/a	n/a	n/a	n/a	n/a
chr17:25376720:25376916:-@chr17:25374692:25374746:-@chr17:25372650:25372855:-	n/a	n/a	n/a	-1	-0.111111	0.930829	0.34	0.16	-0.18	-0.954944	0.09	0.35	0.64	0.07	0.4	0.9	0.07	0.27	0.59	0.01	0.11	0.32	0.01	0.28	0.83	0.01	0.13	0.46	0.01	0.09	0.36	0.07	0.29	0.58	0.01	0.19	0.61	0.01	0.17	0.63	0	0.08	0.26	0.07	0.27	0.62	0.01	0.19	0.44
chr10:4909719:4909802:+@chr10:4920266:4920286:+@chr10:4920781:4920873:+	ENSMUSG00000019769	Syne1,mKIAA1756	complete cds.,Mus musculus enaptin165 short isoform mRNA,synaptic nuclear envelope 1 isoform 3,synaptic nuclear envelope 1 isoform 1	n/a	n/a	n/a	n/a	n/a	n/a	n/a	n/a	n/a	n/a	n/a	n/a	n/a	n/a	n/a	n/a	0	0.2	0.58	n/a	n/a	n/a	0.06	0.39	0.88	0.11	0.51	0.98	n/a	n/a	n/a	0.01	0.24	0.72	0.04	0.55	0.96	n/a	n/a	n/a	n/a	n/a	n/a	n/a	n/a	n/a
chr6:56664831:56665208:+@chr6:56673470|56673501:56673590:+	ENSMUSG00000029787	Kiaa0241,mKIAA0241	Mus musculus adult male thymus cDNA, full insert sequence., clone:5830411G16 product:hypothetical protein,Protein KIAA0241., RIKEN full-length enriched library	n/a	n/a	n/a	n/a	n/a	n/a	n/a	n/a	n/a	n/a	n/a	n/a	n/a	0.49	0.82	0.98	n/a	n/a	n/a	n/a	n/a	n/a	n/a	n/a	n/a	n/a	n/a	n/a	0.52	0.82	0.99	n/a	n/a	n/a	0.19	0.7	0.98	0.03	0.43	0.99	0.34	0.72	0.95	0.14	0.47	0.95
chr10:128270368:128270467:+@chr10:128275500|128275503:128275546:+	ENSMUSG00000078427	1110005A23Rik	full insert sequence., RIKEN full-length enriched library, clone:1110005A23 product:hypothetical SAP domain containing protein,cytokine induced protein 29 kDa,Mus musculus 18-day embryo whole body cDNA	-3	0.0707071	2.70149	0.77	0.73	-0.04	-1.13667	0.71	0.84	0.93	0.52	0.71	0.84	0.56	0.77	0.95	0.56	0.77	0.93	0.46	0.69	0.87	0.65	0.83	0.94	0.7	0.81	0.89	0.73	0.82	0.9	0.68	0.78	0.87	0.73	0.79	0.85	0.55	0.76	0.94	0.47	0.71	0.9	0.63	0.85	0.98
chr11:3023722:3024127:+@chr11:3025791:3026061:+@chr11:3028932:3029523:+	n/a	n/a	n/a	-7	1.13131	12.4395	0.97	0.98	0.01	-0.653671	0.94	0.98	1	0.9	0.96	1	0.88	0.96	0.99	0.89	0.95	0.99	0.85	0.95	1	0.94	0.98	1	0.95	0.98	1	0.97	0.99	1	0.93	0.98	1	0.95	0.98	1	0.95	0.99	1	0.89	0.96	0.99	0.67	0.78	0.86
chr9:42072289:42072393:-@chr9:42070134:42070214:-@chr9:42067765:42067982:-	ENSMUSG00000032018	Sc5d	,sterol-C5-desaturase (fungal ERG3	n/a	n/a	n/a	n/a	n/a	n/a	n/a	0.52	0.78	0.97	0.43	0.8	0.98	0.47	0.78	0.98	0.13	0.51	0.95	n/a	n/a	n/a	0.41	0.75	0.96	0.81	0.94	1	0.13	0.38	0.78	0.16	0.33	0.62	0.37	0.59	0.86	n/a	n/a	n/a	0.36	0.76	0.97	n/a	n/a	n/a
chr9:78047297:78047348:+@chr9:78052006|78052039:78052171:+	ENSMUSG00000032348	Gsta4	glutathione S-transferase	n/a	n/a	n/a	n/a	n/a	n/a	n/a	0	0.02	0.05	0	0.01	0.03	0	0.02	0.05	0	0.01	0.05	0	0.02	0.05	0	0.02	0.05	0	0.01	0.02	0	0.01	0.02	0	0.01	0.03	0	0	0.02	0	0.02	0.06	0	0.02	0.06	0	0.02	0.08
chr4:147992900:147992783|147992756:-@chr4:147986491:147991814:-	ENSMUSG00000041459	n/a	n/a	1	0.484848	7.46624	0.88	0.86	-0.03	0.0689975	0.74	0.88	0.97	0.63	0.86	0.99	0.76	0.91	1	0.77	0.89	0.97	0.65	0.86	0.99	0.46	0.63	0.79	0.54	0.71	0.86	0.46	0.7	0.89	0.67	0.88	0.97	0.55	0.8	0.97	0.68	0.85	0.96	0.57	0.79	0.96	0.78	0.88	0.96
chr7:144086146:144086370:+@chr7:144156122:144156380:+@chr7:144160641:144160699:+@chr7:144277632:144277792:+	ENSMUSG00000054612	Mgmt	O-6-methylguanine-DNA methyltransferase	6	0.545455	8.03939	0.06	0.2	0.13	0.678478	0.01	0.09	0.26	0	0.03	0.11	0	0.07	0.25	0	0.06	0.23	0.01	0.16	0.86	0.01	0.05	0.18	0.08	0.3	0.69	0	0.11	0.34	0.01	0.16	0.73	0.02	0.15	0.37	0	0.09	0.34	0.13	0.44	0.93	0	0.12	0.52
chr9:121904994:121905147:-@chr9:121893218:121893274:-@chr9:121890719:121892941:-	n/a	n/a	n/a	22	-0.242424	9.42069	0.26	0.57	0.31	2.36102	0.17	0.35	0.62	0.04	0.16	0.42	0.04	0.27	0.72	0.04	0.19	0.56	0.05	0.28	0.65	0.04	0.18	0.39	0.02	0.16	0.46	0.06	0.17	0.32	0.02	0.15	0.4	0.07	0.18	0.34	0.01	0.14	0.4	0.01	0.15	0.4	0.08	0.47	1
chr12:117293190:117293421|117293285:+@chr12:117297373:117302082:+	ENSMUSG00000042063	mKIAA4205,Zfp386	Mus musculus kruppel-like protein mRNA, complete cds.,zinc finger protein 386 (Kruppel-like) isoform	-26	-0.737374	12.555	0.93	0.47	-0.46	-2.01216	0.73	0.93	1	0.79	0.94	1	0.78	0.93	0.99	0.78	0.93	0.99	0.56	0.81	0.95	0.66	0.89	1	0.69	0.89	0.98	0.85	0.95	1	0.85	0.94	0.99	0.58	0.82	0.98	0.83	0.95	0.99	0.33	0.73	0.94	0.5	0.81	0.97
chr1:36614861:36615227:-@chr1:36612922|36612925:36612777:-	ENSMUSG00000026121	mKIAA1739,Sema4c	Mus musculus B16 F10Y cells cDNA, RIKEN full-length enriched library,Semaphorin-4C precursor (Semaphorin I) (Sema I) (Semaphorin C-like 1) (M-Sema F)., (semaphorin) 4C, clone:G370082P17 product:sema domain, full insert sequence., transmembrane domain (TM) and short cytoplasmic domain, immunoglobulin domain (Ig)	n/a	n/a	n/a	n/a	n/a	n/a	n/a	0.05	0.33	0.75	0.06	0.38	0.74	0.04	0.38	0.79	0	0.31	0.79	n/a	n/a	n/a	0.16	0.6	0.96	0	0.33	0.68	0.02	0.27	0.67	0.02	0.41	0.9	0.09	0.38	0.78	0.03	0.28	0.81	0.02	0.42	0.88	0.02	0.21	0.5
chr14:52508417:52508511:+@chr14:52508822:52508892:+@chr14:52509203:52509310:+	ENSMUSG00000004561	Mett11d1	D14Ertd209e protein	-1	-0.353535	5.39419	0.76	0.73	-0.03	-0.119845	0.56	0.81	0.97	0.59	0.8	0.96	0.31	0.67	0.93	0.56	0.81	0.97	0.71	0.9	1	0.4	0.8	0.98	0.61	0.83	0.97	0.1	0.3	0.59	0.12	0.44	0.81	0.41	0.78	1	0.3	0.71	0.96	0.27	0.63	0.92	0.12	0.44	0.91
chr7:127781176:127781259:+@chr7:127781362:127781511:+@chr7:127783748:127783812:+	ENSMUSG00000030884	Uqcrc2	ubiquinol cytochrome c reductase core protein 2	n/a	n/a	n/a	n/a	n/a	n/a	n/a	0.99	1	1	0.98	0.99	1	0.98	0.99	1	0.99	1	1	0.97	0.99	1	0.98	1	1	0.99	1	1	0.99	1	1	1	1	1	0.99	1	1	0.97	0.99	1	0.99	1	1	0.94	0.98	1
chr9:15119546:15119575:+@chr9:15119827:15119884:+	n/a	n/a	n/a	n/a	n/a	n/a	n/a	n/a	n/a	n/a	n/a	n/a	n/a	n/a	n/a	n/a	n/a	n/a	n/a	n/a	n/a	n/a	n/a	n/a	n/a	0.06	0.15	0.37	0.07	0.28	0.66	0.13	0.41	0.8	0.18	0.49	0.86	0.13	0.33	0.64	0.05	0.2	0.53	0.02	0.12	0.34	0.19	0.53	0.91
chr3:89162997:89163125:-@chr3:89162484:89162623:-@chr3:89161430:89161848:-	n/a	na/a	n/a	n/a	n/a	n/a	n/a	n/a	n/a	n/a	n/a	n/a	n/a	n/a	n/a	n/a	n/a	n/a	n/a	n/a	n/a	n/a	n/a	n/a	n/a	n/a	n/a	n/a	n/a	n/a	n/a	n/a	n/a	n/a	n/a	n/a	n/a	n/a	n/a	n/a	n/a	n/a	n/a	n/a	n/a	n/a	n/a	n/a	n/a
chr11:68655522:68655670:-@chr11:68653373:68653509:-@chr11:68649652:68649825:-	ENSMUSG00000018736	Ndel1	NudeL protein,Nuclear distribution protein nudE-like 1 (Protein Nudel) (Protein mNudE-like) (mNudE-L).	n/a	n/a	n/a	n/a	n/a	n/a	n/a	0.89	0.97	1	0.86	0.94	1	0.85	0.95	1	0.87	0.95	0.99	0.8	0.91	0.99	0.65	0.84	0.98	0.86	0.95	1	0.95	0.98	1	0.98	0.99	1	0.97	0.99	1	0.87	0.95	1	0.89	0.96	1	0.91	0.97	1
chr1:89670720:89670806:+@chr1:89671388:89671444:+@chr1:89672332:89672438:+	ENSMUSG00000026289	Atg16l1,APG16L	complete cds.,Autophagy-related protein 16-1 (APG16-like 1).,Mus musculus mRNA for Apg16L alpha	-6	0.262626	5.31357	0.51	0.38	-0.13	-1.17861	0.31	0.59	0.87	0.31	0.65	0.91	0.08	0.29	0.61	0.27	0.63	0.93	0.12	0.35	0.81	0.07	0.32	0.63	0.3	0.61	0.88	0.08	0.3	0.59	0.32	0.72	0.98	0.29	0.56	0.83	0.27	0.59	0.89	0.1	0.34	0.65	0.02	0.2	0.6
chr19:42832283:42832396:-@chr19:42830748:42830830:-	n/a	n/a	n/a	n/a	n/a	n/a	n/a	n/a	n/a	n/a	0.24	0.53	0.98	n/a	n/a	n/a	n/a	n/a	n/a	0.39	0.77	1	n/a	n/a	n/a	0.15	0.34	0.63	0.17	0.55	0.98	0.44	0.72	0.97	n/a	n/a	n/a	0.2	0.54	0.94	n/a	n/a	n/a	n/a	n/a	n/a	n/a	n/a	n/a
chr1:88423294:88423525:+@chr1:88425350:88425431:+@chr1:88425748:88426371:+	n/a	n/a	n/a	n/a	n/a	n/a	n/a	n/a	n/a	n/a	0	0.01	0.02	0.01	0.02	0.04	0.01	0.03	0.05	0.01	0.03	0.05	0.01	0.03	0.06	0	0.01	0.03	0	0.02	0.03	0	0.01	0.02	0	0.01	0.03	0	0	0.02	0	0.01	0.03	0	0.01	0.04	0	0.01	0.03
chr1:24035039:24037403:-@chr1:24033550|24033607:24033447:-	ENSMUSG00000026153	4921533L14Rik	hypothetical protein LOC68187	n/a	n/a	n/a	n/a	n/a	n/a	n/a	0.6	0.86	0.98	0.66	0.86	1	0.72	0.91	0.99	0.61	0.84	0.99	0.36	0.7	0.98	0.77	0.95	1	0.82	0.94	1	0.81	0.95	0.99	0.51	0.79	1	0.58	0.84	0.99	0.61	0.88	0.98	0.6	0.85	0.98	0.64	0.86	0.98
chr1:164606822:164606948:-@chr1:164604230:164604282:-@chr1:164600854:164603787:-	ENSMUSG00000040225	Bat2d	RIKEN full-length enriched library, clone:I1C0027N14 product:BAT2-iso homolog (Fragment)., clone:6720444G20 product:hypothetical BAT2,Blastocyst blastocyst cDNA, full insert sequence.,BAT2 domain containing 1, clone:D430005P07 product:hypothetical protein,12 days embryo male wolffian duct includes surrounding region cDNA, N-terminal containing protein,Mus musculus 13 days embryo lung cDNA	61	2.27273	18.5874	0.27	0.72	0.45	3.15952	0.05	0.16	0.33	0.16	0.33	0.55	0.18	0.32	0.53	0.18	0.35	0.53	0	0.07	0.21	0.05	0.12	0.21	0.24	0.42	0.63	0.34	0.54	0.75	0.16	0.34	0.6	0.13	0.27	0.47	0.33	0.48	0.63	0.27	0.43	0.58	0.51	0.69	0.84
chr11:70422668:70422756:+@chr11:70422910:70422933:+@chr11:70423056:70423219:+	ENSMUSG00000020827	Mink1,MINK	complete cds.,misshapen-like kinase 1 isoform 4,misshapen-like kinase 1 isoform 1,misshapen-like kinase 1 isoform 2,misshapen-like kinase 1 isoform 3,Mus musculus mRNA for Misshapen/NIKs-related kinase MINK-1	-5	2.19192	8.85652	0.49	0.3	-0.19	-0.812048	0.1	0.27	0.5	0.35	0.58	0.8	0.33	0.62	0.86	0.02	0.11	0.29	0.04	0.34	0.76	0.15	0.39	0.69	0.41	0.66	0.86	0.56	0.75	0.9	0.2	0.52	0.92	0.41	0.69	0.87	0.12	0.37	0.63	0.13	0.37	0.65	0.15	0.42	0.77
chr11:78312593:78313124:+@chr11:78313203|78313233:78313544:+	ENSMUSG00000017344	n/a	vitronectin	n/a	n/a	n/a	n/a	n/a	n/a	n/a	0.76	0.91	0.99	0.84	0.95	1	0.72	0.91	0.99	0.83	0.94	0.99	0.43	0.76	0.96	0.8	0.94	1	0.69	0.9	1	0.88	0.97	1	0.62	0.85	0.99	0.69	0.88	0.99	0.86	0.95	1	0.64	0.85	0.98	0.58	0.85	0.98
chr7:120669502:120669552:+@chr7:120682787|120682791:120682980:+	ENSMUSG00000030759	Mlstd2	Fatty acyl-CoA reductase 1 (EC 1.2.1.-) (Male sterility domain- containing protein 2).,male sterility domain containing 2	4	0.20202	2.69298	0.63	0.77	0.13	1.41033	0.1	0.67	0.99	0.2	0.64	0.96	0.16	0.59	0.99	0.07	0.42	0.86	0.37	0.75	0.95	0.4	0.77	0.96	0.58	0.83	0.99	0.58	0.88	0.99	0.69	0.87	0.99	0.68	0.87	0.97	0.32	0.7	0.99	0.14	0.67	0.97	0.15	0.52	0.97
chr17:87419741:87419857:-@chr17:87408143:87408251:-@chr17:87396593:87396907:-	ENSMUSG00000024145	Pigf	phosphatidylinositol glycan anchor biosynthesis	18	0.20202	8.01385	0.05	0.16	0.11	2.2209	0.02	0.06	0.12	0.01	0.05	0.11	0.01	0.04	0.11	0.01	0.05	0.11	0.02	0.09	0.18	0.03	0.07	0.13	0.03	0.07	0.12	0.04	0.07	0.13	0.02	0.05	0.11	0	0.02	0.04	0.02	0.1	0.22	0.04	0.09	0.16	0.03	0.08	0.18
chr15:99817834:99817909:+@chr15:99820724:99820860:+	n/a	n/a	n/a	n/a	n/a	n/a	n/a	n/a	n/a	n/a	0	0.01	0.02	n/a	n/a	n/a	n/a	n/a	n/a	0	0	0.01	n/a	n/a	n/a	0	0.01	0.02	0	0	0	0	0.01	0.02	0.01	0.01	0.03	0.01	0.01	0.02	n/a	n/a	n/a	0	0.01	0.02	0	0	0.01
chr10:70724832:70724863:-@chr10:70722490:70722567:-	n/a	n/a	n/a	14	1.61616	11.2589	0.02	0.08	0.06	1.09992	0.01	0.02	0.03	0.02	0.03	0.05	0.01	0.02	0.03	0.02	0.03	0.05	0.02	0.03	0.05	0.02	0.03	0.04	0.01	0.02	0.03	0.01	0.02	0.04	0.03	0.04	0.06	0.03	0.04	0.06	0.02	0.03	0.06	0.01	0.03	0.04	0.01	0.02	0.04
chr11:94409677:94409492|94409473:-@chr11:94405734:94406099:-	ENSMUSG00000039096	Rsad1	Rsad1 protein (Fragment).,radical S-adenosyl methionine domain containing	3	0.141414	2.08898	0.48	0.62	0.14	1.36841	0.12	0.57	0.96	0.02	0.17	0.44	0.33	0.69	1	0.11	0.48	0.85	0.21	0.72	0.96	0.42	0.76	0.98	0.02	0.53	0.95	0.45	0.78	1	0.09	0.51	0.92	0.06	0.5	0.99	0.07	0.57	1	0.08	0.45	0.85	0.31	0.75	0.98
chr17:30141440:30142253:+@chr17:30197755:30197795:+@chr17:30272268:30272604:+	ENSMUSG00000044477	Zfand3	zinc finger, RIKEN full-length enriched library,Mus musculus 7 days embryo whole body cDNA, full insert sequence., clone:C430017I01 product:testis expressed gene 27, AN1-type domain 3	-13	0.616162	8.7406	0.94	0.87	-0.08	-1.55781	0.87	0.95	0.99	0.86	0.94	0.99	0.85	0.94	0.99	0.91	0.97	1	0.71	0.88	0.97	0.7	0.84	0.94	0.92	0.97	1	0.92	0.96	0.99	0.98	0.99	1	0.98	0.99	1	0.85	0.95	1	0.62	0.88	0.99	0.78	0.94	0.99
chr12:105474357:105474528:+@chr12:105475405:105475496:+@chr12:105476148:105476554:+	n/a	n/a	n/a	n/a	n/a	n/a	n/a	n/a	n/a	n/a	n/a	n/a	n/a	n/a	n/a	n/a	n/a	n/a	n/a	n/a	n/a	n/a	n/a	n/a	n/a	n/a	n/a	n/a	n/a	n/a	n/a	n/a	n/a	n/a	n/a	n/a	n/a	n/a	n/a	n/a	0.01	0.29	0.9	n/a	n/a	n/a	n/a	n/a	n/a
chr3:148485919:148486015:-@chr3:148484244:148484372:-@chr3:148483937:148483989:-@chr3:148478547:148480892:-	ENSMUSG00000028184	Lphn2	Hypothetical protein.,latrophilin 2	n/a	n/a	n/a	n/a	n/a	n/a	n/a	0.03	0.13	0.32	0.01	0.12	0.32	0	0.07	0.21	0.02	0.09	0.25	0.04	0.16	0.42	0.01	0.07	0.23	0.02	0.07	0.16	0.02	0.11	0.28	0.04	0.12	0.29	0.01	0.07	0.2	0.01	0.07	0.22	0	0.07	0.24	0.02	0.16	0.55
chrX:95976295:95976356:-@chrX:95959044:95959115:-@chrX:95927704:95927805:-	ENSMUSG00000031214	Ophn1	clone:4732459I12 product:oligophrenin 1,oligophrenin 1, full insert sequence.,Mus musculus 10 days neonate skin cDNA, RIKEN full-length enriched library	n/a	n/a	n/a	n/a	n/a	n/a	n/a	n/a	n/a	n/a	n/a	n/a	n/a	n/a	n/a	n/a	n/a	n/a	n/a	n/a	n/a	n/a	0.12	0.43	0.8	0.39	0.8	0.98	0.65	0.88	0.99	0.15	0.56	0.92	0.22	0.64	1	n/a	n/a	n/a	0.46	0.75	0.94	n/a	n/a	n/a
chr11:33061106:33061225:-@chr11:33060828:33060921:-@chr11:33060334:33060440:-	ENSMUSG00000057113	Npm1	Nucleophosmin 1.	-59	-1.67677	16.5461	0.97	0.73	-0.25	-3.46445	0.94	0.98	1	0.91	0.96	0.99	0.92	0.98	1	0.92	0.97	1	0.7	0.87	0.99	0.78	0.89	0.99	0.96	0.99	1	0.94	0.98	1	0.95	0.99	1	0.97	0.99	1	0.94	0.98	1	0.81	0.92	0.98	0.73	0.85	0.97
chrX:7343681:7344810:+@chrX:7345019:7345123:+@chrX:7346556:7347956:+	ENSMUSG00000000134	Tcfe3	Transcription factor E3.	n/a	n/a	n/a	n/a	n/a	n/a	n/a	0.69	0.9	0.99	0.69	0.88	0.98	0.4	0.69	0.92	0.39	0.69	0.94	0.68	0.89	0.99	0.71	0.91	0.99	0.53	0.8	0.98	0.77	0.94	1	0.46	0.84	0.99	0.45	0.79	0.98	0.64	0.89	1	0.65	0.82	0.94	0.68	0.9	1
chr2:71350183:71350225:+@chr2:71353694:71353857:+@chr2:71360590:71360687:+	ENSMUSG00000041921	Metapl1	Mus musculus adult male cerebellum cDNA, clone:1500015B04 product:methionine aminopeptidase-like 1, RIKEN full-length enriched library	-2	-0.0707071	1.53249	0.82	0.61	-0.21	-1.25892	0.5	0.8	0.99	0.6	0.84	0.99	0.55	0.82	0.99	0.66	0.9	0.99	0.35	0.69	0.96	0.66	0.88	0.99	0.7	0.9	1	0.65	0.87	1	0.47	0.74	0.95	0.58	0.85	0.99	0.56	0.82	0.98	0.67	0.88	0.99	0.51	0.82	0.98
chr17:34134505:34134230|34134219:-@chr17:34132979:34134102:-	ENSMUSG00000061232	H2-K1	K1,histocompatibility 2,H2-K1 protein., K region isoform 1	-4	0.333333	11.1573	0.01	0.01	0	-0.388386	0	0.01	0.04	0	0.01	0.03	0	0.01	0.04	0	0.01	0.02	0	0.01	0.03	0	0.01	0.02	0	0.01	0.03	0.1	0.15	0.19	0	0.01	0.04	0	0.01	0.02	0	0.01	0.02	0	0.02	0.05	0.01	0.04	0.08
chr2:32567551:32567774:-@chr2:32566087|32566311:32565997:-	ENSMUSG00000009555	Cdk9	cyclin-dependent kinase 9	20	-0.444444	19.4683	0.28	0.49	0.21	1.05014	0.25	0.38	0.54	0.16	0.29	0.48	0.07	0.17	0.29	0.04	0.1	0.18	0.11	0.24	0.43	0.16	0.27	0.42	0.4	0.55	0.71	0.22	0.39	0.58	0.34	0.51	0.71	0.41	0.54	0.67	0.08	0.15	0.25	0.04	0.15	0.34	0.17	0.3	0.47
chr5:105568499:105568605:-@chr5:105565858:105566064:-@chr5:105564086:105564209:-	ENSMUSG00000079363	mKIAA4245,Gbp4	full insert sequence.,macrophage activation 2, RIKEN full-length enriched library, clone:F630222G02 product:macrophage activation 2,Mus musculus NOD-derived CD11c +ve dendritic cells cDNA	-21	1.38384	17.6221	0.59	0.4	-0.19	-1.27021	0.31	0.44	0.59	0.41	0.65	0.98	0.47	0.68	0.93	0.41	0.68	0.96	0.53	0.75	0.94	0.12	0.26	0.44	0.26	0.36	0.49	0.53	0.72	0.96	0.45	0.63	0.83	0.66	0.83	0.97	0.51	0.65	0.82	0.6	0.86	1	0.62	0.86	0.99
chr12:105101732:105101829:-@chr12:105095635:105096266:-@chr12:105005626:105006257:-@chr12:105003910:105004180:-	ENSMUSG00000066366	Serpina1a	clade,serine (or cysteine) proteinase inhibitor	-2	-0.010101	6.06779	0.58	0.57	-0.02	-0.327945	0.47	0.55	0.65	0.45	0.55	0.65	0.53	0.65	0.76	0.39	0.59	0.76	0.39	0.49	0.6	0.5	0.6	0.69	0.51	0.59	0.68	0.65	0.79	0.89	0.45	0.55	0.65	0.49	0.57	0.64	0.49	0.6	0.7	0.52	0.64	0.74	0.42	0.53	0.63
chr6:72377036:72377167:+@chr6:72377892:72378043:+@chr6:72378452:72378621:+	ENSMUSG00000053460	Ggcx	gamma-glutamyl carboxylase	-10	-0.808081	6.69038	0.88	0.73	-0.15	-1.3739	0.77	0.91	0.99	0.7	0.88	0.98	0.68	0.86	0.99	0.66	0.88	0.99	0.72	0.91	0.99	0.78	0.93	1	0.82	0.94	1	0.83	0.95	1	0.92	0.98	1	0.91	0.97	1	0.76	0.9	0.98	0.53	0.78	0.96	0.55	0.8	0.98
chr11:4630190:4630270:+@chr11:4631959|4632070:4632181:+	ENSMUSG00000009076	Zmat5	zinc finger, matrin type 5	n/a	n/a	n/a	n/a	n/a	n/a	n/a	0.01	0.04	0.12	0	0.03	0.15	0	0.04	0.13	0	0.03	0.1	0	0.04	0.11	0	0.05	0.13	0	0.03	0.09	0	0.04	0.11	0	0.04	0.12	0	0.03	0.09	0	0.04	0.14	0.01	0.05	0.17	n/a	n/a	n/a
chr11:119704996:119705070:+@chr11:119707500:119707623:+@chr11:119707672:119707737:+@chr11:119708067:119708258:+	ENSMUSG00000025583	4932417H02Rik,raptor,Raptor	Regulatory-associated protein of mTOR (Raptor) (P150 target of rapamycin (TOR)-scaffold protein)., complete cds.,raptor,Mus musculus raptor mRNA for p150 target of rapamycin (TOR)-scaffold protein containing WD-repeats	n/a	n/a	n/a	n/a	n/a	n/a	n/a	0.01	0.05	0.11	0	0.04	0.14	0.01	0.07	0.17	0	0.03	0.12	0	0.07	0.23	0	0.03	0.08	0.01	0.05	0.14	0	0.03	0.14	0	0.07	0.2	0	0.04	0.16	0	0.03	0.1	0	0.06	0.15	0.02	0.1	0.26
chr19:37358611:37358722:-@chr19:37355075:37355242:-@chr19:37352231:37352503:-	ENSMUSG00000056999	n/a	insulin degrading enzyme	n/a	n/a	n/a	n/a	n/a	n/a	n/a	0.95	0.99	1	0.94	0.98	1	0.93	0.97	1	0.93	0.98	1	0.88	0.95	0.99	0.8	0.92	0.99	0.95	0.98	1	0.93	0.98	1	0.87	0.96	1	0.88	0.97	1	0.91	0.97	1	0.91	0.98	1	0.91	0.98	1
chr15:74785499:74786147:+@chr15:74787845:74787893:+@chr15:74788207:74788818:+	n/a	n/a	n/a	4	0.565657	13.135	0.08	0.1	0.02	0.261465	0.04	0.12	0.24	0.01	0.06	0.15	0.01	0.06	0.15	0.06	0.13	0.22	0	0.03	0.12	0	0.04	0.11	0.03	0.09	0.18	0.01	0.06	0.14	0.38	0.62	0.83	0.03	0.13	0.26	0.01	0.07	0.2	0	0.03	0.11	0	0.02	0.08
chr7:149690155:149690169:+@chr7:149691421:149691435:+@chr7:149693655:149693693:+	n/a	na/a	n/a	n/a	n/a	n/a	n/a	n/a	n/a	n/a	n/a	n/a	n/a	n/a	n/a	n/a	n/a	n/a	n/a	n/a	n/a	n/a	n/a	n/a	n/a	n/a	n/a	n/a	n/a	n/a	n/a	n/a	n/a	n/a	n/a	n/a	n/a	n/a	n/a	n/a	n/a	n/a	n/a	0.17	0.55	0.91	n/a	n/a	n/a
chr18:89056725:89056605|89056601:-@chr18:89035287:89040310:-	ENSMUSG00000056153	Cis4,Socs6	complete cds.,Mus musculus cytokine inducible SH2-containing protein CIS4 (Cis4) mRNA,suppressor of cytokine signaling 6	-4	-0.212121	3.21384	0.6	0.44	-0.17	-1.17862	0.17	0.6	0.96	0.11	0.61	0.94	0.17	0.6	0.95	0.03	0.33	0.97	0.05	0.5	0.99	0.24	0.66	0.97	0.07	0.61	0.96	0.04	0.41	0.9	0.56	0.81	0.97	0.21	0.57	0.88	0.28	0.67	0.99	0.3	0.71	0.97	0.14	0.47	0.86
chr3:19099976:19100167:+@chr3:19100641:19100702:+@chr3:19106452:19106550:+@chr3:19111468:19111583:+	ENSMUSG00000027601	Mtfr1	Mus musculus KIAA0009 protein mRNA, complete cds.,mitochondrial fission regulator 1	n/a	n/a	n/a	n/a	n/a	n/a	n/a	0	0.02	0.06	0	0.02	0.08	0	0.02	0.08	0	0.01	0.05	0	0.03	0.1	0	0.02	0.07	0	0.02	0.06	0	0.02	0.08	0	0.04	0.15	0	0.04	0.11	0	0.02	0.07	0	0.03	0.11	0	0.03	0.1
chr11:107034918:107035043:-@chr11:107034715|107034775:107034524:-	ENSMUSG00000018433	Nol11	RIKEN full-length enriched library,nucleolar protein 11, clone:1500002M01 product:hypothetical Cytochrome cd1-nitrite reductase-like,Mus musculus adult male cerebellum cDNA, full insert sequence., C-terminal haem d1 containing protein	-5	-1.0303	9.60792	0.75	0.71	-0.04	-0.413169	0.32	0.67	0.96	0.68	0.88	0.98	0.36	0.7	0.91	0.26	0.53	0.88	0.3	0.58	0.87	0.14	0.35	0.63	0.66	0.86	0.98	0.37	0.63	0.89	0.2	0.59	0.96	0.45	0.77	0.96	0.08	0.4	0.85	0.45	0.75	0.95	0.41	0.7	0.96
chr13:38083866:38083978:-@chr13:38081456|38081460:38081373:-	ENSMUSG00000021427	Ssr1	signal sequence receptor	n/a	n/a	n/a	n/a	n/a	n/a	n/a	0.43	0.71	0.93	0.62	0.88	0.99	0.75	0.93	1	0.85	0.95	1	0.78	0.92	0.99	0.83	0.95	1	0.93	0.98	1	0.9	0.97	1	0.89	0.97	1	0.81	0.95	1	0.76	0.93	1	0.73	0.91	0.99	0.86	0.96	1
chr11:62601461:62601546:-@chr11:62598495|62598511:62598381:-	ENSMUSG00000047342	Zfp286	full insert sequence., RIKEN full-length enriched library, clone:6030449O16 product:similar to ZINC FINGER PROTEIN ZNF286 [Homo sapiens],Mus musculus 13 days embryo male testis cDNA,zinc finger protein 286	n/a	n/a	n/a	n/a	n/a	n/a	n/a	n/a	n/a	n/a	n/a	n/a	n/a	n/a	n/a	n/a	n/a	n/a	n/a	n/a	n/a	n/a	n/a	n/a	n/a	n/a	n/a	n/a	n/a	n/a	n/a	n/a	n/a	n/a	0.2	0.58	0.94	n/a	n/a	n/a	n/a	n/a	n/a	n/a	n/a	n/a
chr3:90311467:90311548:-@chr3:90310030:90310183:-	n/a	n/a	n/a	2	-1.51515	27.1458	0.19	0.27	0.08	0.129491	0.19	0.22	0.27	0.14	0.16	0.19	0.15	0.18	0.22	0.33	0.4	0.48	0.16	0.21	0.27	0.36	0.43	0.52	0.33	0.4	0.47	0.35	0.43	0.53	0.73	0.84	0.94	0.58	0.7	0.84	0.17	0.21	0.26	0.26	0.32	0.39	0.29	0.37	0.47
chr4:126138150:126138331:-@chr4:126137747|126137829:126137611:-	ENSMUSG00000041530	Eif2c1	eukaryotic translation initiation factor 2C	n/a	n/a	n/a	n/a	n/a	n/a	n/a	0.03	0.22	0.5	0	0.08	0.29	0.02	0.16	0.48	n/a	n/a	n/a	0.01	0.19	0.59	n/a	n/a	n/a	0.01	0.07	0.22	0	0.05	0.15	0.02	0.15	0.43	0.01	0.07	0.19	n/a	n/a	n/a	n/a	n/a	n/a	0.01	0.23	0.85
chr6:145125853:145126020:-@chr6:145124692:145124805:-@chr6:145123021:145123844:-	ENSMUSG00000043541	Casc1	Mus musculus adult male diencephalon cDNA, clone:9330159M01 product:weakly similar to OVARC1000411 PROTEIN [Homo sapiens], RIKEN full-length enriched library	n/a	n/a	n/a	n/a	n/a	n/a	n/a	n/a	n/a	n/a	n/a	n/a	n/a	n/a	n/a	n/a	0.01	0.39	0.93	n/a	n/a	n/a	0.1	0.52	0.92	n/a	n/a	n/a	0.03	0.35	0.79	0.05	0.43	0.9	n/a	n/a	n/a	n/a	n/a	n/a	n/a	n/a	n/a	n/a	n/a	n/a
chr15:68044406:68044176|68044155:-@chr15:68018613:68018798:-	ENSMUSG00000022335	Zfat1	ZFAT zinc finger 1	n/a	n/a	n/a	n/a	n/a	n/a	n/a	0.07	0.57	0.93	0.26	0.68	0.94	0.07	0.56	0.94	0.03	0.42	0.89	0.05	0.62	0.97	0.04	0.39	0.81	0.3	0.77	0.99	0.12	0.52	0.82	0.43	0.81	0.98	0.14	0.59	0.96	0.39	0.8	0.98	0.16	0.58	0.9	0.1	0.57	0.92
chr5:107125551:107125850:-@chr5:107095804:107095864:-@chr5:107064629:107067654:-	ENSMUSG00000049606	Zfp644	zinc finger motif enhancer binding protein 2	-9	0.565657	6.78853	0.33	0.33	0	-1.40909	0	0.19	0.63	0.06	0.4	0.81	0.01	0.39	0.97	0.01	0.26	0.7	0.45	0.76	0.95	0.34	0.67	0.99	0.08	0.26	0.62	0.05	0.3	0.67	0.17	0.47	0.87	0.05	0.24	0.51	0.01	0.23	0.67	0.03	0.27	0.66	0.02	0.16	0.39
chr3:107562943:107563521:-@chr3:107559907:107560046:-@chr3:107559535:107559657:-	ENSMUSG00000014599	Csf1	Macrophage colony-stimulating factor 1 precursor (CSF-1) (MCSF).,colony stimulating factor 1	16	1.85859	9.01851	0.13	0.3	0.17	1.56804	0.01	0.06	0.21	0.04	0.23	0.61	0.01	0.11	0.38	0.01	0.15	0.62	0.17	0.47	0.76	0.16	0.41	0.77	0.03	0.14	0.35	0.02	0.06	0.12	0	0.06	0.19	0.03	0.1	0.21	0	0.05	0.18	0.08	0.25	0.53	0.03	0.21	0.54
chr16:23108632:23108706:+@chr16:23108794|23108840:23108924:+	n/a	n/a	n/a	29	4.36364	14.9176	0.55	0.94	0.39	1.6515	0.68	0.84	0.97	0.22	0.32	0.42	0.35	0.49	0.64	0.87	0.96	1	0.82	0.94	1	0.9	0.97	1	0.97	0.99	1	0.97	0.99	1	0.89	0.96	1	0.98	0.99	1	0.57	0.73	0.9	0.96	0.99	1	0.97	0.99	1
chr17:24744382:24744476:-@chr17:24743169:24743297:-@chr17:24741750:24741937:-	ENSMUSG00000002496	Tsc2	partial cds., RIKEN full-length enriched library,Mus musculus domesticus tuberous sclerosis 2 protein (Tsc2) mRNA, clone:G370011L22 product:tuberous sclerosis 2,B16 F10Y cells cDNA,tuberous sclerosis 2 isoform 2, full insert sequence. (Fragment).	-8	0.373737	4.52509	0.97	0.84	-0.12	-1.85051	0.9	0.97	1	0.93	0.98	1	0.83	0.95	1	0.83	0.93	0.99	0.8	0.95	1	0.89	0.97	1	0.77	0.88	0.97	0.72	0.84	0.95	0.86	0.96	0.99	0.73	0.87	0.98	0.77	0.88	0.96	0.8	0.9	0.98	0.64	0.81	0.96
chr2:48752492:48752630:+@chr2:48753998:48754128:+@chr2:48755114:48760527:+	ENSMUSG00000052155	Acvr2a,ActR	full insert sequence., RIKEN full-length enriched library,Mus musculus adult male aorta and vein cDNA, clone:A530094G04 product:activin receptor IIA,activin receptor IIA	n/a	n/a	n/a	n/a	n/a	n/a	n/a	0.61	0.86	0.99	0.74	0.92	0.99	0.65	0.86	0.99	0.48	0.78	0.97	0.75	0.92	1	0.66	0.86	0.97	0.87	0.96	1	0.8	0.95	0.99	0.65	0.83	0.95	0.74	0.9	0.98	0.75	0.91	0.99	0.7	0.87	0.99	0.73	0.92	1
chr1:183853691:183853971:-@chr1:183851789:183851899:-@chr1:183849456:183849760:-	ENSMUSG00000022995	Enah	clone:9030215D04 product:enabled homolog (Drosophila),Mus musculus adult male colon cDNA, RIKEN full-length enriched library	-23	-1.42424	21.0536	0.95	0.73	-0.22	-1.0248	0.85	0.95	1	0.84	0.95	1	0.89	0.96	1	0.48	0.63	0.82	0.21	0.37	0.56	0.63	0.78	0.92	0.52	0.62	0.72	0.6	0.68	0.76	0.9	0.96	1	0.97	0.99	1	0.88	0.95	0.99	0.51	0.7	0.85	0.52	0.66	0.82
chr2:90895615:90895719:+@chr2:90895805:90895867:+@chr2:90896062:90896462:+	ENSMUSG00000002102	Psmc3	proteasome (prosome, macropain) 26S subunit	n/a	n/a	n/a	n/a	n/a	n/a	n/a	0.98	0.99	1	0.97	0.99	1	0.96	0.99	1	0.97	0.99	1	0.94	0.98	1	0.95	0.99	1	0.98	0.99	1	0.99	1	1	0.96	0.99	1	0.98	0.99	1	0.98	0.99	1	0.97	0.99	1	0.97	0.99	1
chr11:101157630:101157572|101157508:-@chr11:101156848:101156938:-	ENSMUSG00000035086	Becn1	beclin 1,Mus musculus Bcl-2-interacting protein beclin mRNA, partial cds.	n/a	n/a	n/a	n/a	n/a	n/a	n/a	0.02	0.05	0.1	0	0.02	0.08	0	0.02	0.06	0.11	0.21	0.35	0	0.05	0.19	0.02	0.05	0.13	0.01	0.03	0.07	0.01	0.05	0.11	0.02	0.07	0.16	0.08	0.18	0.29	0.06	0.13	0.22	0.02	0.09	0.22	0.06	0.16	0.36
chr16:10731754:10731912:+@chr16:10738485:10738608:+@chr16:10741707:10744971:+	ENSMUSG00000068663	Clec16a,4932416N17Rik,mKIAA0350	Adult male testis cDNA, RIKEN full-length enriched library,C-type lectin domain family 16, member A, clone:4932416N17 product:hypothetical Gram-positive cocci surface protein 'anchoring' hexapeptide/C-type lectin domain containing protein, full insert sequence.,Mus musculus adult male testis cDNA	16	0.666667	8.35935	0.18	0.21	0.03	1.83427	0.09	0.17	0.28	0.1	0.18	0.27	0.11	0.2	0.31	0.01	0.06	0.12	0.02	0.09	0.21	0.03	0.09	0.18	0.07	0.13	0.23	0.06	0.11	0.17	0.04	0.1	0.19	0.02	0.05	0.11	0.08	0.17	0.28	0.14	0.3	0.47	0.04	0.11	0.25
chr8:81818947:81819406:+@chr8:81820511:81820550:+@chr8:81829502:81832860:+	n/a	n/a	n/a	n/a	n/a	n/a	n/a	n/a	n/a	n/a	n/a	n/a	n/a	n/a	n/a	n/a	n/a	n/a	n/a	n/a	n/a	n/a	n/a	n/a	n/a	n/a	n/a	n/a	n/a	n/a	n/a	n/a	n/a	n/a	0.09	0.45	0.99	n/a	n/a	n/a	n/a	n/a	n/a	n/a	n/a	n/a	n/a	n/a	n/a
chr2:167328587:167329101:+@chr2:167332547|167332569:167332697:+	ENSMUSG00000006418	Zfp313	zinc finger protein 313, clone:I830013N03 product:zinc finger protein 313,Bone marrow macrophage cDNA, full insert sequence. (Fragment)., RIKEN full-length enriched library	n/a	n/a	n/a	n/a	n/a	n/a	n/a	0.88	0.96	1	0.93	0.98	1	0.91	0.97	1	0.47	0.81	0.99	0.44	0.77	0.98	0.56	0.83	0.99	0.58	0.87	1	0.72	0.89	0.99	0.3	0.67	0.98	0.64	0.87	0.99	0.94	0.98	1	0.4	0.78	0.96	0.44	0.77	0.97
chr9:121604652:121604860:-@chr9:121602028:121602191:-@chr9:121598732:121599533:-	ENSMUSG00000061536	Sec22c	SEC22 vesicle trafficking protein-like 3	n/a	n/a	n/a	n/a	n/a	n/a	n/a	0.7	0.9	0.99	0.46	0.8	0.96	0.55	0.82	0.99	0.38	0.78	1	0.23	0.68	0.96	0.35	0.73	0.97	0.68	0.9	0.99	0.65	0.86	0.98	0.48	0.81	0.99	0.66	0.87	0.98	0.59	0.86	0.99	n/a	n/a	n/a	n/a	n/a	n/a
chr17:13203204:13203502:+@chr17:13206299|13206302:13206478:+	ENSMUSG00000006818	Sod2	superoxide dismutase 2, mitochondrial	n/a	n/a	n/a	n/a	n/a	n/a	n/a	0.99	1	1	0.99	1	1	0.99	1	1	0.99	1	1	0.99	1	1	0.99	1	1	0.99	1	1	0.99	1	1	0.99	1	1	0.99	1	1	0.98	0.99	1	0.99	1	1	0.99	1	1
chr7:74762879:74763016:-@chr7:74704855|74704950:74704744:-	ENSMUSG00000030556	Lrrc28	leucine rich repeat containing 28, containing protein, RIKEN full-length enriched library,Adult male tongue cDNA,Mus musculus adult male liver cDNA, clone:1300004K21 product:RIKEN cDNA 2210012C09 gene, full insert sequence., clone:2310058O11 product:Leucine-rich repeat/Leucine-rich repeat	n/a	n/a	n/a	n/a	n/a	n/a	n/a	0.11	0.32	0.57	0.13	0.39	0.69	0.12	0.4	0.79	0.01	0.16	0.61	0	0.26	0.83	0.05	0.28	0.62	0.1	0.28	0.53	0.42	0.7	0.89	0.11	0.36	0.83	0.05	0.32	0.75	0.42	0.63	0.83	0.42	0.69	0.94	0.14	0.33	0.67
chr8:73029655:73030560:-@chr8:73028883:73028959:-@chr8:73028190:73028408:-	ENSMUSG00000058833	2810428I15Rik	hypothetical protein LOC66462	n/a	n/a	n/a	n/a	n/a	n/a	n/a	0.97	0.99	1	0.97	0.99	1	0.97	0.99	1	0.96	0.99	1	0.93	0.98	1	0.94	0.98	1	0.97	0.99	1	0.98	0.99	1	0.96	0.99	1	0.97	0.99	1	0.97	0.99	1	0.97	0.99	1	0.96	0.99	1
chr10:41529379:41529469:-@chr10:41501290:41501356:-@chr10:41464544:41465727:-	ENSMUSG00000019813	2410017P07Rik	hypothetical protein LOC103268	n/a	n/a	n/a	n/a	n/a	n/a	n/a	0.13	0.6	0.97	0.09	0.48	0.92	0.09	0.5	0.95	0.02	0.31	0.84	0.02	0.42	0.88	0.01	0.41	0.88	0.06	0.58	0.95	0.09	0.39	0.77	0.1	0.59	1	0.05	0.42	0.96	0.08	0.49	0.92	n/a	n/a	n/a	0.01	0.57	0.97
chr14:21125454:21125588:+@chr14:21126455:21126586:+@chr14:21126915:21127063:+	ENSMUSG00000021809	Nudt13	Mus musculus 13 days embryo head cDNA,nudix-type motif 13, clone:3110052E14 product:hypothetical NUDIX hydrolase containing protein, full insert sequence., RIKEN full-length enriched library	28	-1.10101	10.3538	0.12	0.49	0.37	2.81065	0.07	0.16	0.3	0.06	0.14	0.27	0.01	0.06	0.17	0.02	0.09	0.18	0.05	0.17	0.37	0.06	0.16	0.3	0.07	0.14	0.24	0.15	0.27	0.43	0.23	0.46	0.7	0.11	0.24	0.43	0.09	0.22	0.4	0.06	0.16	0.32	0.11	0.32	0.61
chr15:36723900:36724293:-@chr15:36723234:36723430:-@chr15:36720439:36720743:-	ENSMUSG00000022285	Ywhaz	tyrosine 3-monooxygenase/tryptophan	-7	1.28283	27.1405	0.8	0.53	-0.26	-0.305183	0.47	0.6	0.74	0.74	0.88	0.98	0.8	0.91	0.99	0.63	0.78	0.94	0.11	0.2	0.32	0.34	0.47	0.61	0.38	0.47	0.57	0.5	0.62	0.76	0.28	0.39	0.54	0.29	0.39	0.49	0.75	0.88	0.98	0.71	0.85	0.95	0.63	0.82	1
chr12:79975551:79975630:+@chr12:79975717:79975914:+@chr12:79978079:79978230:+	ENSMUSG00000021116	Eif2s1	eukaryotic translation initiation factor 2	n/a	n/a	n/a	n/a	n/a	n/a	n/a	0	0.01	0.03	0	0.01	0.05	0	0.02	0.06	0	0.01	0.03	0	0.02	0.05	0	0.01	0.03	0	0.01	0.02	0	0.01	0.02	0	0.01	0.04	0	0.02	0.05	0	0.01	0.03	0	0.02	0.04	0.01	0.03	0.07
chr19:8872714:8872959:-@chr19:8871726:8871885:-@chr19:8868970:8869020:-	ENSMUSG00000071662	Polr2g	polymerase (RNA) II (DNA directed) polypeptide	n/a	n/a	n/a	n/a	n/a	n/a	n/a	0.94	0.98	1	0.95	0.98	1	0.91	0.97	1	0.94	0.98	1	0.91	0.97	1	0.96	0.99	1	0.95	0.99	1	0.97	0.99	1	0.98	0.99	1	0.98	0.99	1	0.92	0.97	1	0.93	0.98	1	0.92	0.97	1
chr6:35015022:35014898|35014889:-@chr6:35006211:35006268:-	ENSMUSG00000038784	Cnot4	Cnot4 protein.,CCR4-NOT transcription complex subunit 4 (EC 6.3.2.-) (E3 ubiquitin protein ligase CNOT4) (CCR4-associated factor 4) (Potential transcriptional repressor NOT4Hp).	-1	-0.040404	0.898025	0.37	0.21	-0.16	-1.06856	0.03	0.26	0.79	0.11	0.46	0.81	0.09	0.39	0.78	0.06	0.45	0.83	0.03	0.33	0.83	0.15	0.46	0.84	0.06	0.33	0.64	0.03	0.16	0.34	0.05	0.19	0.4	0.02	0.14	0.33	0.01	0.13	0.41	0.04	0.18	0.43	0	0.14	0.39
chr7:118692304:118692190|118692145:-@chr7:118663504:118663689:-	ENSMUSG00000038296	Galntl4	UDP-N-acetyl-alpha-D-galactosamine:polypeptide	n/a	n/a	n/a	n/a	n/a	n/a	n/a	0.01	0.18	0.5	0.07	0.27	0.59	0.02	0.15	0.46	0.02	0.17	0.41	0.01	0.12	0.37	0.01	0.18	0.56	0.01	0.1	0.32	0.01	0.09	0.29	0	0.09	0.4	0	0.06	0.25	0.02	0.25	0.64	0.01	0.16	0.51	0	0.16	0.46
chr19:46471386:46471774:+@chr19:46475614:46475748:+@chr19:46499489:46500330:+	ENSMUSG00000025231	Sufu	suppressor of fused homolog isoform 2	n/a	n/a	n/a	n/a	n/a	n/a	n/a	0.73	0.92	1	0.78	0.93	1	0.66	0.91	0.99	0.4	0.82	0.99	0.52	0.86	0.99	0.89	0.96	1	0.72	0.91	0.99	0.77	0.93	0.99	0.7	0.91	0.99	0.53	0.86	0.99	0.67	0.88	0.98	0.54	0.8	0.97	0.66	0.89	0.98
chr17:24655687:24655744:-@chr17:24653450:24653541:-@chr17:24651658:24651774:-	ENSMUSG00000052752	Traf7	full insert sequence.,2 days neonate thymus thymic cells cDNA,Tnf receptor-associated factor 7, clone:E430016H12 product:synaptotagmin 4, RIKEN full-length enriched library	n/a	n/a	n/a	n/a	n/a	n/a	n/a	0.65	0.86	0.98	0.65	0.85	0.99	0.72	0.88	0.98	0.75	0.9	0.99	0.67	0.9	1	0.88	0.97	1	0.78	0.94	1	0.6	0.81	0.98	0.43	0.71	0.93	0.5	0.74	0.98	0.41	0.64	0.95	0.67	0.89	1	0.48	0.77	0.96
chr19:24909233:24909395:-@chr19:24898782:24898928:-@chr19:24894610:24894735:-	ENSMUSG00000041731	Pgm5	full insert sequence.,Mus musculus adult male urinary bladder cDNA, clone:9530058B14 product:PHOSPHOGLUCOMUTASE-LIKE PROTEIN 5 (PHOSPHOGLUCOMUTASE-RELATED PROTEIN) (PGM-RP) (ACICULIN) homolog [Homo sapiens],phosphoglucomutase 5, RIKEN full-length enriched library	n/a	n/a	n/a	n/a	n/a	n/a	n/a	0.88	0.96	1	0.83	0.94	0.99	0.64	0.79	0.96	0.93	0.98	1	0.9	0.97	1	0.93	0.98	1	0.96	0.99	1	0.97	0.99	1	0.99	1	1	0.99	1	1	0.65	0.81	0.95	0.83	0.94	0.99	0.89	0.96	1
chr2:25315687:25315877:-@chr2:25315529:25315594:-	n/a	n/a	n/a	2	-0.868687	7.98945	0.17	0.17	0	0.35906	0.06	0.14	0.26	0.11	0.2	0.32	0.08	0.17	0.31	0.01	0.04	0.1	0.06	0.25	0.49	0.26	0.44	0.66	0.11	0.22	0.35	0.02	0.08	0.15	0.01	0.08	0.23	0.11	0.22	0.4	0.16	0.26	0.39	0.23	0.39	0.6	0.05	0.12	0.23
chr17:35282971:35283114:+@chr17:35283191:35283298:+	n/a	n/a	n/a	1	-0.040404	0.931158	0.01	0.03	0.03	1.11732	0	0.01	0.03	0.01	0.01	0.03	0	0	0.01	0.01	0.02	0.04	0.01	0.02	0.05	0	0.01	0.03	0.01	0.02	0.04	0	0.02	0.04	0.02	0.06	0.11	0.01	0.03	0.06	0.01	0.03	0.05	0	0.01	0.03	0	0.01	0.03
chr19:38192974:38192891|38192762:-@chr19:38191110:38191399:-	ENSMUSG00000024990	Rbp4	retinol binding protein 4	n/a	n/a	n/a	n/a	n/a	n/a	n/a	n/a	n/a	n/a	n/a	n/a	n/a	n/a	n/a	n/a	n/a	n/a	n/a	n/a	n/a	n/a	0.4	0.71	0.95	0.72	0.91	0.99	0.58	0.85	0.98	0.36	0.71	0.95	0.7	0.89	0.98	n/a	n/a	n/a	n/a	n/a	n/a	n/a	n/a	n/a
chr7:26503937:26504107:-@chr7:26501873:26502018:-@chr7:26500754:26501206:-	ENSMUSG00000002608	Ccdc97	coiled-coil domain containing 97	-2	-0.838384	21.9055	0.4	0.32	-0.08	-0.0530284	0.32	0.44	0.56	0.33	0.47	0.64	0.19	0.29	0.41	0.05	0.12	0.22	0.33	0.56	0.78	0.08	0.15	0.24	0.38	0.49	0.62	0.35	0.47	0.58	0.76	0.84	0.92	0.79	0.87	0.94	0.64	0.81	0.94	0.53	0.74	0.98	0.47	0.66	0.87
chr10:128258598:128258692:-@chr10:128257317:128257567:-@chr10:128257010:128257161:-	ENSMUSG00000025353	Ormdl2	ORM1-like 2	4	-0.0505051	2.6982	0.75	0.76	0.01	1.50119	0.46	0.73	0.96	0.58	0.84	0.98	0.4	0.67	0.88	0.47	0.65	0.83	0.73	0.91	1	0.71	0.9	1	0.64	0.85	0.98	0.62	0.84	0.98	0.86	0.96	0.99	0.82	0.93	1	0.65	0.83	0.97	0.62	0.84	0.96	0.61	0.84	0.99
chr11:98104675:98104704:+@chr11:98104773:98104886:+	n/a	n/a	n/a	n/a	n/a	n/a	n/a	n/a	n/a	n/a	0.47	0.79	0.96	0.28	0.65	0.94	0.45	0.77	1	0.21	0.58	0.92	0.68	0.9	1	n/a	n/a	n/a	0.71	0.92	1	0.5	0.81	0.98	n/a	n/a	n/a	n/a	n/a	n/a	0.58	0.83	0.97	0.63	0.83	0.99	0.64	0.86	0.99
chr4:123074991:123075150:-@chr4:123074337:123074663:-@chr4:123073156:123073240:-	ENSMUSG00000028649	Macf,Macf1	MKIAA1251 protein (Fragment)., complete cds.,Macf1 protein (Fragment).,Mus musculus microtubule-actin crosslinking factor (Macf) mRNA	n/a	n/a	n/a	n/a	n/a	n/a	n/a	0.78	0.9	0.97	0.85	0.96	1	0.91	0.97	1	0.9	0.97	1	0.82	0.93	0.99	0.8	0.89	0.97	0.67	0.8	0.91	0.74	0.84	0.92	0.66	0.81	0.92	0.53	0.65	0.77	0.83	0.94	0.98	0.79	0.88	0.95	0.72	0.86	0.98
chr2:59628833:59628955|59628934:+@chr2:59629656:59629937:+	ENSMUSG00000035168	AK134490	RIKEN full-length enriched library, clone:6230414M13 product:hypothetical protein,11 days embryo head cDNA	n/a	n/a	n/a	n/a	n/a	n/a	n/a	0.4	0.71	0.94	0.1	0.29	0.64	0.03	0.17	0.44	0.04	0.27	0.76	0.01	0.11	0.3	0.35	0.66	0.93	0.14	0.36	0.63	0.63	0.88	1	0.16	0.56	0.94	0.23	0.52	0.8	0.03	0.23	0.6	0.12	0.31	0.53	0.07	0.35	0.65
chr12:88293694:88293954|88293881:+@chr12:88300678:88300778:+	ENSMUSG00000034157	mKIAA1737,2310044G17Rik	RIKEN cDNA 2310044G17,Mus musculus mRNA for mKIAA1737 protein.	n/a	n/a	n/a	n/a	n/a	n/a	n/a	0.04	0.17	0.35	0	0.1	0.24	0.07	0.22	0.43	0.54	0.81	0.98	0.01	0.1	0.38	0.09	0.43	0.84	0.1	0.23	0.41	0.07	0.23	0.42	0.21	0.56	0.87	0.12	0.3	0.59	0.03	0.17	0.41	0.14	0.3	0.5	0.03	0.15	0.45
chr18:56706602:56706558|56706554:-@chr18:56704619:56704696:-	ENSMUSG00000053644	Aldh7a1	aldehyde dehydrogenase family 7	4	0.434343	2.55905	0.11	0.25	0.15	1.39335	0.01	0.12	0.48	0.01	0.1	0.31	0	0.1	0.3	0.02	0.21	0.65	0.02	0.47	0.99	0.01	0.14	0.45	0	0.06	0.19	0.01	0.06	0.16	0.01	0.08	0.26	0	0.06	0.2	0.01	0.11	0.36	0.04	0.26	0.72	0	0.14	0.42
chr1:187156028:187156142:+@chr1:187161985:187162111:+@chr1:187165102:187165206:+	ENSMUSG00000026617	Bpnt1	bisphosphate 3'-nucleotidase 1	n/a	n/a	n/a	n/a	n/a	n/a	n/a	0.6	0.8	0.95	0.79	0.92	0.99	0.77	0.91	0.99	0.77	0.91	1	0.71	0.89	1	0.76	0.93	0.99	0.85	0.94	0.99	0.84	0.94	0.99	0.8	0.93	0.99	0.72	0.87	0.98	0.85	0.95	1	0.83	0.92	0.98	0.81	0.94	1
chr3:129736749:129736922:-@chr3:129723456:129723560:-@chr3:129714710:129714790:-	ENSMUSG00000001052	Sec24b	SEC24 related gene family	6	0.434343	6.21201	0.42	0.57	0.15	0.89595	0.15	0.35	0.61	0.18	0.34	0.55	0.33	0.57	0.85	0.37	0.66	0.86	0.52	0.71	0.89	0.09	0.3	0.57	0.4	0.66	0.89	0.2	0.42	0.77	0.18	0.35	0.56	0.12	0.25	0.43	0.23	0.49	0.79	0.39	0.64	0.9	0.3	0.58	0.89
chr13:3648565:3648756|3648620:+@chr13:3649426:3651025:+	ENSMUSG00000033781	Asb13	ankyrin repeat and SOCS box-containing protein	-16	0.161616	10.98	0.94	0.71	-0.23	-1.47192	0.82	0.94	1	0.76	0.93	0.99	0.79	0.94	1	0.86	0.95	0.99	0.86	0.95	0.99	0.89	0.97	0.99	0.81	0.94	1	0.79	0.92	1	0.78	0.93	1	0.76	0.92	0.99	0.75	0.89	0.98	0.76	0.92	0.99	0.77	0.93	1
chr2:132642810:132642981:+@chr2:132643441:132643524:+@chr2:132645339:132645421:+	ENSMUSG00000027353	Mcm8	minichromosome maintenance deficient 8	n/a	n/a	n/a	n/a	n/a	n/a	n/a	n/a	n/a	n/a	n/a	n/a	n/a	n/a	n/a	n/a	n/a	n/a	n/a	n/a	n/a	n/a	n/a	n/a	n/a	0.41	0.74	0.99	0.25	0.66	0.94	0.46	0.75	0.95	0.55	0.83	0.99	n/a	n/a	n/a	0.37	0.71	0.95	n/a	n/a	n/a
chr2:168582300:168581266|168579934:-@chr2:168577954:168578240:-	ENSMUSG00000027547	Sall4	sal-like 4 isoform a,sal-like 4 isoform c,sal-like 4 isoform b	n/a	n/a	n/a	n/a	n/a	n/a	n/a	0.28	0.59	0.94	0.7	0.89	0.99	0.26	0.51	0.81	0.52	0.8	0.99	n/a	n/a	n/a	0.75	0.9	0.99	0.18	0.47	0.91	0.57	0.78	0.96	n/a	n/a	n/a	0.38	0.72	0.99	n/a	n/a	n/a	0.31	0.7	0.93	n/a	n/a	n/a
chr13:101238870:101238981:-@chr13:101231803:101231917:-@chr13:101229735:101230375:-	ENSMUSG00000021639	Gtf2h2	strain=C57BL/6J),strain=BALB/c), polypeptide,Mus musculus cDNA pooled tissues:(tissue_type=brain,general transcription factor II H,(tissue_type=testis,dev_stage=8-12 days neonate,dev_stage=adult, clone:V01Y044O01.	1	-0.030303	0.936947	0.38	0.38	0	1.09964	0.01	0.31	0.78	0.11	0.5	0.85	0.02	0.33	0.86	0.01	0.22	0.7	0.03	0.25	0.62	0.04	0.26	0.68	0	0.1	0.29	0.01	0.12	0.42	0.07	0.26	0.6	0.05	0.27	0.65	0.01	0.4	0.97	0.03	0.43	0.88	0.1	0.42	0.79
chr11:3044220:3044295:-@chr11:3043698:3043793:-@chr11:3043263:3043339:-	ENSMUSG00000023764	Sfi1,BC049259	spindle assembly associated, RIKEN full-length enriched library,Sfi1 homolog, clone:2310047I15 product:hypothetical protein,Mus musculus adult male tongue cDNA, full insert sequence., clone:B230343N13 product:hypothetical protein,Mus musculus adult male corpora quadrigemina cDNA	n/a	n/a	n/a	n/a	n/a	n/a	n/a	0.01	0.09	0.27	0.01	0.12	0.38	0.08	0.26	0.59	0.02	0.09	0.22	0.01	0.32	0.97	0.01	0.27	0.84	0.05	0.19	0.47	0.13	0.33	0.69	0.01	0.1	0.27	0.01	0.07	0.22	0.2	0.44	0.7	0.02	0.09	0.24	0.01	0.1	0.3
chr9:107519266:107519803:-@chr9:107518852|107518874:107518745:-	ENSMUSG00000032562	Gnai2	alpha,guanine nucleotide binding protein	n/a	n/a	n/a	n/a	n/a	n/a	n/a	0.97	0.99	1	0.96	0.98	1	0.96	0.99	1	0.96	0.99	1	0.96	0.99	1	0.96	0.99	1	0.98	0.99	1	0.94	0.98	1	0.93	0.98	1	0.95	0.98	1	0.97	0.99	1	0.98	0.99	1	0.95	0.99	1
chr5:122907435:122907312|122905902:-@chr5:122903312:122904313:-	ENSMUSG00000029467	n/a	n/a	79	-1.78788	24.7118	0.04	0.1	0.06	3.2692	0.04	0.04	0.04	0.04	0.04	0.05	0.04	0.05	0.05	0.03	0.03	0.03	0.03	0.03	0.03	0.03	0.03	0.03	0.03	0.03	0.03	0.03	0.04	0.04	0.02	0.02	0.02	0.02	0.02	0.02	0.05	0.05	0.05	0.03	0.03	0.03	0.04	0.05	0.05
chr14:66590569:66590693|66590689:+@chr14:66592162:66592310:+	ENSMUSG00000022037	n/a	clusterin	n/a	n/a	n/a	n/a	n/a	n/a	n/a	0	0.01	0.02	0	0.01	0.03	0	0.01	0.03	0	0.01	0.03	0	0.02	0.07	0	0.01	0.02	0	0.01	0.01	0	0	0.01	0	0.01	0.02	0	0	0.01	0	0.01	0.03	0	0.01	0.04	0	0.01	0.04
chr5:124562798:124563537:+@chr5:124564074|124564397:124564654:+	ENSMUSG00000023707	Ogfod2	2-oxoglutarate and iron-dependent oxygenase, clone:1300006G11 product:unclassifiable, RIKEN full-length enriched library, full insert sequence.,Mus musculus adult male liver cDNA	-4	0.575758	7.11534	0.83	0.7	-0.14	-0.643083	0.63	0.85	0.97	0.63	0.85	0.98	0.64	0.8	0.99	0.38	0.58	0.85	0.33	0.58	0.9	0.31	0.53	0.76	0.59	0.82	0.97	0.54	0.81	0.97	0.55	0.8	0.98	0.36	0.6	0.85	0.59	0.8	0.95	0.63	0.87	0.99	0.57	0.83	0.98
chr7:87377396:87377699:-@chr7:87377230:87377264:-@chr7:87375202:87375310:-	ENSMUSG00000030538	Cib1	calcium and integrin binding 1 (calmyrin)	n/a	n/a	n/a	n/a	n/a	n/a	n/a	0.64	0.86	1	0.7	0.88	0.98	0.66	0.85	0.98	0.8	0.93	1	0.44	0.78	0.99	0.71	0.92	1	0.77	0.94	1	0.64	0.86	0.98	0.62	0.86	0.98	0.51	0.8	0.97	0.64	0.92	1	0.27	0.72	0.97	0.36	0.76	0.98
chr12:87609926:87610011:+@chr12:87622399:87622493:+@chr12:87629750:87635622:+	ENSMUSG00000021254	1700020O03Rik	Uncharacterized protein C14orf118 homolog.	n/a	n/a	n/a	n/a	n/a	n/a	n/a	0.57	0.79	0.95	0.55	0.8	0.97	0.35	0.62	0.83	0.75	0.91	0.99	0.34	0.77	0.98	0.27	0.6	0.92	0.46	0.71	0.93	0.65	0.83	0.96	0.44	0.7	0.92	0.65	0.89	0.99	0.76	0.92	1	0.28	0.54	0.88	0.4	0.73	0.95
chr6:54942689:54942945:-@chr6:54939494:54939551:-@chr6:54936475:54936962:-	n/a	n/a	n/a	n/a	n/a	n/a	n/a	n/a	n/a	n/a	0.85	0.95	0.99	0.88	0.96	1	0.81	0.92	0.98	0.74	0.95	1	0.58	0.83	0.98	0.79	0.92	0.99	0.84	0.94	0.99	0.89	0.97	1	0.85	0.95	1	0.85	0.95	1	0.74	0.92	1	0.61	0.84	0.99	0.5	0.81	0.97
chr7:29222453:29222593:+@chr7:29226453:29226549:+@chr7:29226688:29226737:+	ENSMUSG00000060791	Gmfg	gamma isoform 2,Mus musculus Gmfg mRNA for glia maturation factor gamma, complete cds., gamma isoform 1,glia maturation factor	n/a	n/a	n/a	n/a	n/a	n/a	n/a	n/a	n/a	n/a	0.63	0.85	0.98	0.58	0.87	0.99	n/a	n/a	n/a	n/a	n/a	n/a	0.66	0.9	0.99	0.7	0.9	0.99	0.84	0.93	0.99	0.79	0.93	1	0.82	0.93	0.99	n/a	n/a	n/a	n/a	n/a	n/a	n/a	n/a	n/a
chr14:58459666:58459755:-@chr14:58458388:58458432:-@chr14:58457927:58458042:-	ENSMUSG00000021969	Zdhhc20	clone:5033406L14 product:weakly similar to REC PROTEIN [Homo sapiens], full insert sequence., RIKEN full-length enriched library,Mus musculus 11 days pregnant adult female ovary and uterus cDNA,DHHC-containing protein 20	-2	-0.242424	1.40771	0.41	0.11	-0.3	-1.24854	0.08	0.47	0.92	0.14	0.42	0.75	0.04	0.34	0.73	0.01	0.45	0.97	0.01	0.3	0.72	0.02	0.14	0.4	0.01	0.15	0.44	0.04	0.16	0.41	0.02	0.18	0.6	0.01	0.13	0.35	0.02	0.43	0.93	0.03	0.37	0.9	0.06	0.38	0.84
chr5:31546136:31546205:+@chr5:31546287:31546364:+	n/a	n/a	n/a	-18	0.505051	18.3564	0.95	0.72	-0.23	-1.0081	0.87	0.96	1	0.87	0.95	1	0.83	0.94	0.99	0.71	0.87	1	0.73	0.91	0.99	0.34	0.47	0.63	0.86	0.95	0.99	0.93	0.98	1	0.88	0.95	0.99	0.89	0.96	0.99	0.93	0.98	1	0.87	0.96	1	0.65	0.85	0.97
chr3:157699480:157699603:-@chr3:157694955:157695030:-@chr3:157693132:157694612:-	n/a	n/a	n/a	n/a	n/a	n/a	n/a	n/a	n/a	n/a	0.02	0.25	0.71	0	0.11	0.55	0.03	0.26	0.74	0.01	0.23	0.62	0.04	0.43	0.89	0.01	0.21	0.51	0.16	0.51	0.95	0.08	0.26	0.52	0.11	0.63	0.97	0.1	0.57	0.94	0.06	0.24	0.55	0.1	0.36	0.72	0.01	0.19	0.51
chr17:35998239:35998462:+@chr17:36000384:36000580:+@chr17:36001057:36001233:+	ENSMUSG00000059791	n/a	nurim	n/a	n/a	n/a	n/a	n/a	n/a	n/a	0.61	0.85	0.97	0.52	0.84	0.99	0.59	0.86	0.99	0.33	0.64	0.89	0.18	0.59	0.93	0.2	0.61	0.98	0.42	0.75	0.96	0.75	0.92	1	0.7	0.88	0.98	0.67	0.9	0.99	0.52	0.8	0.95	0.22	0.63	0.97	n/a	n/a	n/a
chr4:19614938:19615087:-@chr4:19605580|19605582:19605492:-	ENSMUSG00000041058	Wwp1	WW domain-containing protein 1, RIKEN full-length enriched library,Wwp1 protein., full insert sequence.,Mus musculus 11 days embryo head cDNA, clone:6230411J22 product:WWP1 (FRAGMENT) homolog [Homo sapiens]	n/a	n/a	n/a	n/a	n/a	n/a	n/a	0.83	0.94	1	0.63	0.86	0.99	0.79	0.93	1	0.72	0.92	1	0.4	0.75	0.98	0.87	0.96	0.99	0.77	0.93	0.99	0.8	0.93	0.99	0.65	0.91	0.99	0.79	0.94	1	0.42	0.79	0.96	0.75	0.94	1	0.63	0.86	0.99
chr9:103121585:103121554|103121553:-@chr9:103119693:103119863:-	ENSMUSG00000032554	n/a	transferrin	4	-0.0707071	4.07816	0.78	0.91	0.13	0.998173	0.37	0.77	0.98	0.36	0.75	0.99	0.49	0.83	0.99	0.63	0.83	0.97	0.1	0.55	0.93	0.71	0.91	0.99	0.65	0.9	1	0.25	0.72	0.99	0.11	0.41	0.82	0.49	0.83	0.97	0.55	0.82	0.98	0.21	0.58	0.93	0.51	0.82	0.98
chr13:41130123:41130254:-@chr13:41127894:41127968:-@chr13:41125386:41125508:-@chr13:41120377:41121931:-	n/a	na/a	n/a	n/a	n/a	n/a	n/a	n/a	n/a	n/a	n/a	n/a	n/a	n/a	n/a	n/a	n/a	n/a	n/a	n/a	n/a	n/a	n/a	n/a	n/a	n/a	n/a	n/a	n/a	n/a	n/a	n/a	n/a	n/a	n/a	n/a	n/a	n/a	n/a	n/a	n/a	n/a	n/a	n/a	n/a	n/a	n/a	n/a	n/a
chr4:59007985:59008155:+@chr4:59026504:59026727:+@chr4:59030542:59030694:+	ENSMUSG00000070972	2010203O07Rik	hypothetical protein LOC72429	32	0.656566	12.396	0.23	0.62	0.39	2.52852	0.06	0.22	0.5	0.07	0.26	0.61	0.06	0.22	0.6	0.02	0.11	0.27	0.03	0.13	0.33	0.04	0.17	0.41	0.2	0.43	0.84	0.08	0.25	0.54	0.26	0.56	0.86	0.08	0.23	0.46	0.26	0.51	0.85	0.09	0.27	0.58	0.18	0.44	0.88
chr3:107989207:107989596:+@chr3:107990009|107990044:107994697:+	n/a	n/a	n/a	n/a	n/a	n/a	n/a	n/a	n/a	n/a	0.39	0.68	0.92	0.29	0.67	0.95	0.27	0.58	0.87	0.23	0.6	0.92	0.14	0.51	0.9	0.35	0.66	0.94	0.19	0.52	0.85	0.21	0.44	0.72	0.02	0.18	0.47	0.21	0.45	0.77	0.33	0.64	0.92	0.12	0.49	0.87	0.05	0.4	0.75
chr16:20506201:20506310|20506308:+@chr16:20506454:20506544:+	ENSMUSG00000003235	Eif2b5	eukaryotic translation initiation factor 2B	n/a	n/a	n/a	n/a	n/a	n/a	n/a	0	0.06	0.2	0	0.13	0.32	0.01	0.06	0.19	0	0.09	0.23	0	0.16	0.49	0	0.12	0.39	0	0.06	0.21	0.01	0.06	0.19	0.01	0.05	0.16	0	0.06	0.21	0.01	0.06	0.18	0	0.07	0.24	0.01	0.1	0.3
chr4:11140853:11140956:-@chr4:11139939:11140078:-@chr4:11139029:11139079:-	ENSMUSG00000040738	Ints8	integrator complex subunit 8	n/a	n/a	n/a	n/a	n/a	n/a	n/a	0	0.08	0.29	n/a	n/a	n/a	n/a	n/a	n/a	n/a	n/a	n/a	n/a	n/a	n/a	0.06	0.18	0.35	0.02	0.14	0.34	0.01	0.07	0.18	0.01	0.07	0.21	0	0.04	0.14	n/a	n/a	n/a	0.01	0.08	0.23	0.02	0.13	0.3
chr16:43881326:43881106|43880942:-@chr16:43880412:43880467:-	ENSMUSG00000022704	Qtrtd1	Mus musculus 13 days embryo head cDNA, RIKEN full-length enriched library,queuine tRNA-ribosyltransferase domain, clone:3110012M05 product:similar to CDNA FLJ12960 FIS, WEAKLY SIMILAR TO QUEUINE TRNA-RIBOSYLTRANSFERASE (EC 2.4.2.29) [Homo sapiens], full insert sequence., CLONE NT2RP2005605	n/a	n/a	n/a	n/a	n/a	n/a	n/a	0.01	0.15	0.44	n/a	n/a	n/a	0.01	0.08	0.28	n/a	n/a	n/a	n/a	n/a	n/a	0.03	0.19	0.43	0	0.05	0.18	0.02	0.14	0.43	0.01	0.06	0.17	0.01	0.04	0.1	0.01	0.14	0.63	n/a	n/a	n/a	0.04	0.25	0.63
chr13:64468400:64468177|64468176:-@chr13:64467787:64467949:-	ENSMUSG00000021477	Ctsl	cathepsin L preproprotein	n/a	n/a	n/a	n/a	n/a	n/a	n/a	0.97	0.99	1	0.96	0.99	1	0.94	0.98	1	0.93	0.98	1	0.9	0.97	1	0.9	0.96	0.99	0.97	0.99	1	0.92	0.97	1	0.9	0.98	1	0.87	0.96	1	0.93	0.98	1	0.95	0.98	1	0.92	0.98	1
chr1:43854090:43854150:-@chr1:43847309:43847395:-@chr1:43836910:43837014:-	ENSMUSG00000057363	Uxs1	UDP-glucuronate decarboxylase 1	-6	-0.989899	10.9825	0.85	0.81	-0.04	-0.456188	0.64	0.86	0.99	0.62	0.86	0.97	0.55	0.84	0.99	0.51	0.79	1	0.34	0.75	0.99	0.48	0.79	0.98	0.8	0.94	1	0.52	0.81	1	0.6	0.85	0.99	0.6	0.84	1	0.58	0.84	0.97	0.46	0.78	0.97	0.21	0.52	0.83
chr4:107564070:107564126:+@chr4:107564560|107564565:107564641:+	ENSMUSG00000028608	0610037L13Rik	Uncharacterized protein C1orf123 homolog.,hypothetical protein LOC74098	n/a	n/a	n/a	n/a	n/a	n/a	n/a	0.88	0.96	1	0.79	0.92	0.99	0.83	0.95	1	0.8	0.94	1	0.73	0.91	0.99	0.8	0.91	0.99	0.88	0.97	1	0.85	0.95	1	0.73	0.91	0.99	0.87	0.96	1	0.92	0.97	1	0.62	0.86	0.99	0.59	0.83	0.98
chr7:108445271:108445522:-@chr7:108445022:108445087:-@chr7:108444635:108444748:-	ENSMUSG00000047767	Atg16l2	full insert sequence., clone:2410118P20 product:hypothetical G-protein beta WD-40 repeats containing protein,Mus musculus ES cells cDNA, RIKEN full-length enriched library	n/a	n/a	n/a	n/a	n/a	n/a	n/a	0.34	0.69	0.98	0.48	0.76	0.95	0.47	0.79	0.98	0.5	0.82	0.97	0.53	0.81	0.97	0.35	0.63	0.92	0.59	0.83	0.98	0.54	0.84	0.99	0.42	0.84	1	0.58	0.85	0.98	0.39	0.72	0.97	0.18	0.53	0.89	0.27	0.7	1
chr16:7353025:7353157:+@chr16:7363958:7363997:+@chr16:7369894:7369936:+	ENSMUSG00000008658	A2bp1	Ataxin-2 binding protein 1 variant 5.,ataxin 2 binding protein 1 isoform alpha,Ataxin-2 binding protein 1 variant 4.,ataxin 2 binding protein 1 isoform gamma,Ataxin-2 binding protein 1 variant 2.	n/a	n/a	n/a	n/a	n/a	n/a	n/a	0.01	0.08	0.26	0.02	0.2	0.45	0	0.05	0.13	0.01	0.09	0.32	0.01	0.19	0.54	0.01	0.08	0.28	0	0.11	0.45	0.02	0.09	0.26	0.03	0.47	0.9	0.01	0.1	0.29	0.02	0.23	0.7	0.01	0.23	0.79	0.07	0.27	0.6
chr1:137732909:137733023:+@chr1:137737438|137737442:137737489:+	n/a	n/a	n/a	18	2.27273	9.19796	0.91	0.95	0.03	1.70987	0.92	0.93	0.94	0.9	0.91	0.93	0.89	0.9	0.92	0.93	0.94	0.95	0.92	0.94	0.95	0.93	0.94	0.94	0.92	0.94	0.95	0.93	0.95	0.96	0.94	0.96	0.97	0.94	0.96	0.97	0.9	0.92	0.93	0.91	0.93	0.95	0.9	0.92	0.94
chr15:103074390:103074459:+@chr15:103076777|103076781:103076852:+	ENSMUSG00000046434	Hnrnpa1	heterogeneous nuclear ribonucleoprotein A1	10	-0.181818	5.76013	0.66	0.94	0.28	1.76764	0.3	0.6	0.93	0.21	0.61	0.95	0.39	0.76	0.99	0.42	0.72	0.92	0.16	0.46	0.85	0.57	0.82	0.98	0.21	0.58	0.95	0.69	0.88	0.99	0.27	0.62	0.97	0.27	0.61	0.97	0.27	0.66	0.93	0.17	0.47	0.83	0.81	0.93	0.99
chr9:7952953:7953134:-@chr9:7950492:7950539:-@chr9:7938408:7938538:-	ENSMUSG00000053110	Yap1	yes-associated protein 1	-3	-2.65657	8.26354	0.5	0.42	-0.07	-0.0415602	0.3	0.42	0.56	0.32	0.45	0.59	0.44	0.62	0.8	0.28	0.46	0.7	0.15	0.29	0.44	0.49	0.64	0.8	0.42	0.54	0.66	0.35	0.49	0.65	0.52	0.67	0.83	0.36	0.51	0.66	0.54	0.7	0.86	0.38	0.55	0.74	0.59	0.77	0.91
chr6:83071197:83071554:-@chr6:83070179:83070281:-@chr6:83069039:83070038:-	ENSMUSG00000030035	Wbp1	WW domain binding protein 1 isoform 1,WW domain binding protein 1 isoform 2	n/a	n/a	n/a	n/a	n/a	n/a	n/a	0.64	0.84	0.98	0.78	0.91	0.99	0.86	0.96	1	0.88	0.96	1	0.86	0.95	0.99	0.79	0.92	1	0.92	0.97	1	0.94	0.98	1	0.93	0.98	1	0.95	0.98	1	0.77	0.91	0.99	0.71	0.88	0.99	0.81	0.93	1
chr11:115794593:115795095:+@chr11:115796680:115796789:+@chr11:115799324:115799434:+	ENSMUSG00000020755	Sap30bp	SAP30 binding protein	n/a	n/a	n/a	n/a	n/a	n/a	n/a	0.83	0.95	1	0.76	0.93	1	0.77	0.92	1	0.68	0.88	1	0.75	0.92	0.99	0.83	0.94	1	0.91	0.98	1	0.95	0.98	1	0.97	0.99	1	0.98	0.99	1	0.9	0.97	1	0.81	0.94	1	0.88	0.96	1
chr11:66866037:66866120:-@chr11:66865183:66865280:-@chr11:66856421:66856538:-@chr11:66853721:66855609:-	ENSMUSG00000020910	2310004I24Rik	2310004I24Rik protein (14 days pregnant adult female placenta cDNA, clone:I530017B08 product:similar to x 006 protein) (Novel protein).,hypothetical protein LOC66358, RIKEN full-length enriched library	-7	-0.141414	10.6913	0.79	0.78	-0.01	-0.641513	0.44	0.71	0.89	0.73	0.91	1	0.46	0.74	0.97	0.71	0.9	0.98	0.21	0.58	0.91	0.71	0.89	0.98	0.53	0.79	0.94	0.79	0.9	0.97	0.72	0.83	0.93	0.62	0.74	0.86	0.49	0.73	0.89	0.59	0.82	0.98	0.36	0.58	0.78
chr6:42197431:42197583:+@chr6:42197733:42197768:+@chr6:42199378:42199494:+	ENSMUSG00000029864	Gstk1	glutathione S-transferase kappa 1	n/a	n/a	n/a	n/a	n/a	n/a	n/a	0.92	0.98	1	0.85	0.96	1	0.91	0.97	1	0.96	0.99	1	0.94	0.98	1	0.95	0.98	1	0.97	0.99	1	0.87	0.96	0.99	0.87	0.95	0.99	0.92	0.97	1	0.91	0.97	1	0.84	0.95	1	0.72	0.91	0.99
chr5:9131276:9131308:-@chr5:9130477|9130652:9130368:-	ENSMUSG00000042508	Dmtf1	clone:4732497F22 product:cyclin D binding myb-like transcription factor 1, RIKEN full-length enriched library, full insert sequence., clone:A330063D23 product:cyclin D binding myb-like transcription factor 1,Mus musculus 10 days neonate skin cDNA,Adult male spinal cord cDNA,cyclin D binding myb-like transcription factor	n/a	n/a	n/a	n/a	n/a	n/a	n/a	0.05	0.17	0.38	0.01	0.05	0.18	0.04	0.13	0.32	n/a	n/a	n/a	n/a	n/a	n/a	n/a	n/a	n/a	0.04	0.09	0.17	0	0.03	0.1	0.02	0.19	0.5	0.02	0.09	0.21	0.06	0.15	0.27	0.08	0.21	0.45	0.04	0.11	0.23
chr7:132708066:132708250|132708241:+@chr7:132709151:132709238:+	ENSMUSG00000030748	Il4ra	RIKEN full-length enriched library, clone:G530001D21 product:interleukin 4 receptor, clone:G530012N19 product:interleukin 4 receptor, full insert sequence (Bone marrow macrophage cDNA,Bone marrow macrophage cDNA, alpha	n/a	n/a	n/a	n/a	n/a	n/a	n/a	0.04	0.21	0.53	0.01	0.25	0.78	0.02	0.2	0.54	0	0.05	0.16	n/a	n/a	n/a	0.03	0.25	0.57	0	0.16	0.46	0.02	0.12	0.31	0.03	0.33	0.74	0.02	0.2	0.58	0.01	0.1	0.3	0.05	0.24	0.59	0.03	0.22	0.54
chr11:61569697:61569847:-@chr11:61568912:61568964:-@chr11:61566354:61566435:-	ENSMUSG00000020528	Prpsap2	Prpsap2 protein.,phosphoribosyl pyrophosphate	n/a	n/a	n/a	n/a	n/a	n/a	n/a	0.49	0.75	0.94	0.37	0.77	0.96	n/a	n/a	n/a	0.77	0.9	0.98	n/a	n/a	n/a	0.56	0.81	0.95	0.54	0.77	0.95	0.68	0.89	1	0.45	0.71	0.9	0.38	0.57	0.76	0.4	0.72	0.92	0.34	0.73	0.96	0.55	0.85	0.98
chr10:127986144:127986361:-@chr10:127986027|127986029:127986005:-	n/a	n/a	n/a	n/a	n/a	n/a	n/a	n/a	n/a	n/a	0.96	0.99	1	0.96	0.99	1	0.97	0.99	1	0.98	1	1	0.95	0.99	1	0.99	1	1	0.95	0.98	1	0.88	0.96	1	0.93	0.98	1	0.92	0.97	1	0.98	0.99	1	0.97	0.99	1	0.97	0.99	1
chr8:11628439:11628530:-@chr8:11623697:11623858:-@chr8:11620262:11620373:-@chr8:11619062:11619297:-	ENSMUSG00000031508	Ankrd10	clone:A130082N24 product:hypothetical Ankyrin repeat profile/Ankyrin-repeat/Ankyrin repeat region circular profile/Yeast DNA-binding domain containing protein, clone:6330403E01 product:hypothetical Ankyrin repeat profile/Ankyrin- repeat/Ankyrin repeat region circular profile/Yeast DNA-binding domain containing protein,ankyrin repeat domain 10, RIKEN full-length enriched library, clone:9130202P16 …	n/a	n/a	n/a	n/a	n/a	n/a	n/a	0.47	0.61	0.74	0.35	0.5	0.65	0.2	0.33	0.48	0.5	0.63	0.76	0.53	0.69	0.83	0.58	0.7	0.8	0.32	0.43	0.56	0.43	0.56	0.69	0.21	0.32	0.44	0.43	0.57	0.7	0.38	0.54	0.71	0.14	0.27	0.44	0.27	0.45	0.63
chr5:143103654:143105786:+@chr5:143114156:143114238:+@chr5:143131802:143131971:+	ENSMUSG00000029578	Wipi2	WD repeat domain	n/a	n/a	n/a	n/a	n/a	n/a	n/a	0.87	0.96	0.99	0.8	0.94	1	0.75	0.93	0.99	0.88	0.96	1	0.53	0.83	1	0.66	0.89	1	0.87	0.96	1	0.84	0.95	1	0.78	0.93	1	0.8	0.95	1	0.76	0.93	0.99	0.7	0.89	0.99	0.7	0.9	1
chr4:124454585:124454681:+@chr4:124457619:124457782:+@chr4:124459634:124459735:+	ENSMUSG00000028894	Inpp5b	Adult male lung cDNA, RIKEN full-length enriched library, clone:1200004L23 product:inositol polyphosphate-5-phosphatase, full insert sequence., 75 kDa,inositol polyphosphate-5-phosphatase B	n/a	n/a	n/a	n/a	n/a	n/a	n/a	0.66	0.89	1	0.54	0.81	0.98	0.46	0.77	1	0.44	0.77	0.98	n/a	n/a	n/a	0.32	0.69	0.93	0.49	0.79	0.97	0.42	0.68	0.92	0.45	0.75	0.98	0.48	0.76	0.98	0.3	0.6	0.87	0.23	0.61	0.9	n/a	n/a	n/a
chr13:76030354:76030474:-@chr13:76016245:76016418:-@chr13:76011801:76014987:-	ENSMUSG00000021589	Rhobtb3	Rho-related BTB domain containing 3	n/a	n/a	n/a	n/a	n/a	n/a	n/a	0.92	0.97	1	0.9	0.97	1	0.92	0.97	1	0.83	0.93	0.99	0.85	0.95	0.99	0.85	0.96	1	0.93	0.98	1	0.89	0.96	1	0.87	0.96	0.99	0.83	0.94	0.99	0.75	0.92	0.99	0.89	0.97	1	0.88	0.96	0.99
chr11:116009435:116009542:-@chr11:116009218:116009357:-	n/a	n/a	n/a	n/a	n/a	n/a	n/a	n/a	n/a	n/a	0.05	0.26	0.57	0.03	0.13	0.4	0.01	0.12	0.33	0.11	0.34	0.74	n/a	n/a	n/a	0.02	0.33	0.78	0.04	0.15	0.34	0	0.11	0.41	n/a	n/a	n/a	0.01	0.2	0.66	0.01	0.08	0.25	0.03	0.17	0.62	0.2	0.55	0.92
chr2:11705268:11705383|11705376:+@chr2:11705918:11706079:+	ENSMUSG00000047909	Ankrd16,AK013354,BC065408	ankyrin repeat domain 16, RIKEN full-length enriched library, 11 days embryo whole body cDNA,Mus musculus 10, clone:2810455F06 product:hypothetical Ankyrin-repeat containing protein, full insert sequence.	n/a	n/a	n/a	n/a	n/a	n/a	n/a	0.01	0.1	0.28	0.01	0.14	0.51	0.01	0.12	0.34	0.01	0.13	0.41	0.01	0.24	0.62	0.04	0.24	0.53	0	0.07	0.31	0	0.05	0.18	0.01	0.16	0.64	0.01	0.14	0.45	0	0.09	0.28	0.01	0.11	0.28	0.01	0.25	0.66
chr13:45830484:45830547:-@chr13:45793190:45793314:-@chr13:45661918:45663949:-	ENSMUSG00000046876	Atxn1	ataxin 1	4	-0.707071	14.6027	0.67	0.69	0.02	0.322344	0.52	0.77	0.98	0.4	0.74	0.98	0.24	0.51	0.86	0.19	0.47	0.78	0.68	0.9	1	0.01	0.11	0.36	0.66	0.89	0.99	0.58	0.85	1	0.19	0.47	0.83	0.57	0.86	0.99	0.56	0.85	0.99	0.54	0.77	0.96	0.57	0.86	0.98
chr7:134944357:134944760:+@chr7:134944975:134945130:+@chr7:134945348:134946153:+	ENSMUSG00000042289	Hsd3b7	hydroxy-delta-5-steroid dehydrogenase, 3 beta-	n/a	n/a	n/a	n/a	n/a	n/a	n/a	0.86	0.95	0.99	0.91	0.97	1	0.85	0.95	1	0.81	0.94	1	0.89	0.96	1	0.87	0.95	0.99	0.93	0.98	1	0.71	0.92	0.99	0.89	0.96	0.99	0.91	0.97	1	0.85	0.95	0.99	0.77	0.93	0.99	0.8	0.92	0.99
chr11:97526269:97526348:+@chr11:97526800:97526854:+@chr11:97527044:97527153:+	ENSMUSG00000038437	Mllt6	myeloid/lymphoid or mixed lineage-leukemia	n/a	n/a	n/a	n/a	n/a	n/a	n/a	0.83	0.94	0.99	0.87	0.95	1	0.84	0.95	1	0.76	0.92	0.99	0.77	0.92	0.99	0.81	0.93	0.99	0.89	0.97	1	0.86	0.95	1	0.84	0.95	1	0.88	0.97	1	0.85	0.95	1	0.82	0.96	1	0.78	0.92	0.99
chr18:46883049:46882972|46882967:-@chr18:46879941:46880095:-	ENSMUSG00000033022	Cdo1	cysteine dioxygenase 1	n/a	n/a	n/a	n/a	n/a	n/a	n/a	0.02	0.25	0.69	0.05	0.26	0.75	0.03	0.29	0.61	0.02	0.15	0.37	0.01	0.23	0.77	0	0.05	0.19	0	0.09	0.39	0.01	0.09	0.26	0.01	0.04	0.14	0	0.04	0.12	0.02	0.09	0.23	0.02	0.11	0.27	n/a	n/a	n/a
chr17:56836141:56836212:+@chr17:56840446:56840964:+@chr17:56842186:56842313:+	ENSMUSG00000002372	Ranbp3	Mus musculus 10 days embryo whole body cDNA, RIKEN full-length enriched library,Mus musculus 0 day neonate thymus cDNA,RAN binding protein 3, full insert sequence., clone:A430102I21 product:similar to RANBP3-A PROTEIN (FRAGMENT) [Homo sapiens], clone:2610024N24 product:RIKEN cDNA 2610024N24 gene	3	0.010101	2.60727	0.27	0.3	0.03	1.14675	0.16	0.25	0.35	0.21	0.31	0.44	0.17	0.24	0.33	0.18	0.28	0.41	0.11	0.18	0.27	0.28	0.43	0.67	0.23	0.32	0.43	0.21	0.29	0.38	0.16	0.3	0.5	0.19	0.3	0.44	0.26	0.37	0.51	0.25	0.38	0.54	0.32	0.59	0.95
chr13:30011983:30012101:-@chr13:30010646|30010664:30010445:-	ENSMUSG00000016477	n/a	n/a	n/a	n/a	n/a	n/a	n/a	n/a	n/a	n/a	n/a	n/a	0.28	0.68	0.97	0.35	0.7	0.96	n/a	n/a	n/a	0.04	0.38	0.77	n/a	n/a	n/a	0.44	0.8	0.99	0.64	0.86	0.99	n/a	n/a	n/a	n/a	n/a	n/a	n/a	n/a	n/a	n/a	n/a	n/a	n/a	n/a	n/a
chr10:77453417:77453569:-@chr10:77453049|77453051:77452887:-	ENSMUSG00000020277	Pfkl	phosphofructokinase, liver	n/a	n/a	n/a	n/a	n/a	n/a	n/a	0.94	0.98	1	0.96	0.99	1	0.96	0.99	1	0.9	0.96	1	0.9	0.97	1	0.9	0.97	1	0.95	0.99	1	0.96	0.99	1	0.97	0.99	1	0.96	0.99	1	0.92	0.98	1	0.95	0.98	1	0.87	0.96	1
chr9:99143756:99143909:+@chr9:99146642|99146686:99146785:+	ENSMUSG00000056267	Cep70	Mus musculus unknown mRNA.,centrosomal protein 70	n/a	n/a	n/a	n/a	n/a	n/a	n/a	n/a	n/a	n/a	n/a	n/a	n/a	n/a	n/a	n/a	n/a	n/a	n/a	n/a	n/a	n/a	0.05	0.31	0.67	n/a	n/a	n/a	n/a	n/a	n/a	n/a	n/a	n/a	0.07	0.32	0.75	n/a	n/a	n/a	n/a	n/a	n/a	n/a	n/a	n/a
chr4:147374831:147375063:+@chr4:147375167|147375454:147375493:+	ENSMUSG00000041616	Nppa	natriuretic peptide precursor type A	9	0.0707071	22.0111	0.97	0.97	0	0.405672	0.89	0.96	0.99	0.95	0.98	1	0.9	0.97	1	0.92	0.97	1	0.8	0.93	1	0.96	0.99	1	0.68	0.73	0.78	0.72	0.78	0.84	0.23	0.26	0.28	0.28	0.3	0.33	0.93	0.97	1	0.78	0.92	1	0.91	0.97	1
chr15:5135555:5135768:+@chr15:5139582:5139803:+@chr15:5158369:5158450:+	ENSMUSG00000022151	Ttc33	clone:2410099M07 product:similar to OSMOSIS RESPONSIVE FACTOR [Homo sapiens],Mus musculus ES cells cDNA, RIKEN full-length enriched library	n/a	n/a	n/a	n/a	n/a	n/a	n/a	0.97	0.99	1	0.94	0.98	1	0.95	0.99	1	0.93	0.98	1	0.86	0.96	1	0.89	0.96	1	0.96	0.99	1	0.97	0.99	1	0.96	0.99	1	0.98	0.99	1	0.95	0.98	1	0.91	0.97	1	0.93	0.98	1
chr7:52588752:52588822:-@chr7:52583091:52583265:-@chr7:52582642:52582822:-	ENSMUSG00000038260	Trpm4	,Transient receptor potential cation channel subfamily M member 4 (Long transient receptor potential channel 4) (Calcium-activated non- selective cation channel 1)., complete cds.,transient receptor potential cation channel,Mus musculus Trpm4 mRNA for transient receptor potential cation channel subfamily M member 4 isoform b	n/a	n/a	n/a	n/a	n/a	n/a	n/a	0.17	0.47	0.85	0.42	0.76	1	0.38	0.67	0.92	0.34	0.6	0.8	0.05	0.43	0.89	0.49	0.77	0.95	0.7	0.9	1	0.72	0.89	0.99	0.57	0.82	0.97	0.71	0.89	0.99	0.66	0.89	0.99	0.34	0.72	0.97	0.6	0.87	0.99
chr1:134915354:134915672:-@chr1:134909288|134909291:134909214:-	ENSMUSG00000054387	Mdm4	transformed mouse 3T3 cell double minute 4	-4	0.191919	2.57288	0.41	0.38	-0.03	-1.62927	0.02	0.49	0.94	0.05	0.36	0.81	0.08	0.38	0.75	0.35	0.76	0.98	0.19	0.55	0.84	0.01	0.18	0.65	0.18	0.45	0.75	0.28	0.59	0.89	0.08	0.37	0.84	0.04	0.4	0.83	0.17	0.44	0.79	0.28	0.68	0.98	0.12	0.37	0.69
chr2:32455221:32455356:+@chr2:32464746:32464836:+@chr2:32467744:32467923:+	ENSMUSG00000026811	St6galnac6,ST6GalNAc VI	complete cds.,ST6,Mus musculus ST6GalNAc VI mRNA for GD1 alpha/GT1a alpha/GQ1b alpha synthase	-7	-0.020202	5.22036	0.92	0.79	-0.13	-1.33703	0.86	0.94	0.99	0.74	0.9	0.97	0.8	0.91	0.98	0.68	0.85	0.96	0.46	0.79	0.99	0.73	0.91	0.99	0.77	0.91	0.99	0.7	0.86	0.97	0.56	0.8	0.99	0.67	0.84	0.97	0.85	0.95	0.99	0.66	0.87	1	0.83	0.94	0.99
chr9:65972414:65972694:-@chr9:65964258:65964332:-@chr9:65956949:65957435:-	n/a	n/a	n/a	n/a	n/a	n/a	n/a	n/a	n/a	n/a	0	0.06	0.19	0	0.04	0.14	0	0.06	0.18	0	0.04	0.11	0.07	0.31	0.79	0	0.09	0.37	0	0.04	0.13	0	0.02	0.07	0	0.02	0.05	0	0.01	0.04	0	0.06	0.19	0.01	0.16	0.49	0	0.08	0.24
chr7:30571194:30571322:+@chr7:30573068:30573194:+@chr7:30574360:30576932:+	ENSMUSG00000047473	mKIAA0961,Zfp30	Mus musculus 13 days embryo head cDNA,Zinc finger protein 30 (Zfp-30)., RIKEN full-length enriched library,zinc finger protein 30, clone:3110018N02 product:zinc finger protein 30, full insert sequence.	-9	-1.25253	6.77688	0.91	0.8	-0.11	-1.14322	0.61	0.88	0.98	0.75	0.92	1	0.72	0.93	1	0.44	0.73	0.92	0.68	0.88	0.99	0.89	0.96	1	0.79	0.93	0.99	0.79	0.93	0.99	0.78	0.93	0.98	0.8	0.93	0.99	0.71	0.91	1	0.24	0.63	0.93	0.55	0.79	0.98
chr13:24487068:24487356:+@chr13:24508770:24508879:+@chr13:24509093:24509293:+	ENSMUSG00000016756	Cmah,CMAH	cytidine monophospho-N-acetylneuraminic acid,Mus musculus CMAH mRNA for CMP-NeuAc hydroxylase, complete cds, major form of alternative splicing.	n/a	n/a	n/a	n/a	n/a	n/a	n/a	n/a	n/a	n/a	n/a	n/a	n/a	n/a	n/a	n/a	n/a	n/a	n/a	n/a	n/a	n/a	n/a	n/a	n/a	n/a	n/a	n/a	n/a	n/a	n/a	n/a	n/a	n/a	n/a	n/a	n/a	0.14	0.55	0.95	n/a	n/a	n/a	n/a	n/a	n/a
chr3:135174767:135174937:+@chr3:135175310:135175411:+@chr3:135180867:135180990:+	ENSMUSG00000028164	Manba	beta A, complete cds.,mannosidase,Mus musculus beta-mannosidase mRNA, lysosomal	n/a	n/a	n/a	n/a	n/a	n/a	n/a	0.06	0.25	0.62	0.06	0.4	0.86	0.14	0.35	0.6	0.1	0.35	0.64	0.04	0.26	0.88	0.04	0.32	0.67	0.06	0.23	0.45	0.05	0.33	0.74	0.14	0.42	0.73	0.01	0.17	0.46	0.02	0.21	0.63	0.03	0.22	0.6	0.01	0.23	0.73
chr9:69864626:69864730:+@chr9:69866487:69866625:+@chr9:69867196:69867717:+	ENSMUSG00000033543	Gtf2a2	2,Mus musculus 2 days neonate thymus thymic cells cDNA, clone:C920021J23 product:general transcription factor II A, RIKEN full-length enriched library	-1	-0.454545	4.09797	0.32	0.25	-0.07	-0.133103	0.22	0.39	0.58	0.11	0.21	0.31	0.16	0.36	0.6	0.17	0.35	0.57	0.07	0.2	0.43	0.09	0.18	0.31	0.07	0.13	0.21	0.16	0.26	0.36	0.07	0.15	0.26	0.05	0.13	0.25	0.23	0.47	0.75	0.13	0.27	0.46	0.16	0.34	0.57
chr16:31314638:31314897:-@chr16:31314550|31314554:31314485:-	ENSMUSG00000022548	Apod	apolipoprotein D	n/a	n/a	n/a	n/a	n/a	n/a	n/a	n/a	n/a	n/a	n/a	n/a	n/a	0.52	0.79	0.96	0.46	0.72	0.94	n/a	n/a	n/a	n/a	n/a	n/a	0.75	0.9	0.98	n/a	n/a	n/a	0.83	0.95	1	0.64	0.85	0.96	n/a	n/a	n/a	n/a	n/a	n/a	n/a	n/a	n/a
chr15:88537464:88537724:-@chr15:88531203:88531700:-@chr15:88522179:88522314:-	ENSMUSG00000022387	mKIAA4191	full insert sequence., clone:G530012I18 product:bromodomain containing 1, RIKEN full-length enriched library,Mus musculus bone marrow macrophage cDNA	22	-0.757576	11.9967	0.49	0.73	0.25	1.89698	0.38	0.5	0.65	0.4	0.54	0.7	0.31	0.42	0.55	0.67	0.86	0.97	0.41	0.69	0.96	0.61	0.8	0.95	0.37	0.48	0.61	0.44	0.58	0.74	0.4	0.57	0.83	0.37	0.49	0.63	0.5	0.61	0.74	0.49	0.65	0.81	0.73	0.87	0.97
chr9:64356515:64356615:+@chr9:64392401:64392493:+@chr9:64486042:64486288:+	ENSMUSG00000036466	Megf11,mKIAA1781	RIKEN full-length enriched library, clone:1500006K05 product:MEGF11 protein (Hypothetical protein KIAA1781) homolog (Fragment).,Adult male cerebellum cDNA, full insert sequence.,Mus musculus ES cells cDNA,MEGF11 protein, clone:2410080H04 product:weakly similar to MEGF11 PROTEIN (KIAA1781) [Homo sapiens]	n/a	n/a	n/a	n/a	n/a	n/a	n/a	n/a	n/a	n/a	n/a	n/a	n/a	n/a	n/a	n/a	n/a	n/a	n/a	n/a	n/a	n/a	n/a	n/a	n/a	n/a	n/a	n/a	0.25	0.66	0.95	n/a	n/a	n/a	n/a	n/a	n/a	n/a	n/a	n/a	n/a	n/a	n/a	n/a	n/a	n/a
chr17:35282971:35283114:+@chr17:35283215|35283224:35283298:+	ENSMUSG00000024392	Bat3	clone:7120447D04 product:HLA-B-associated transcript 3, RIKEN full-length enriched library,Bat3 protein (Fragment).,Mus musculus 2 days neonate sympathetic ganglion cDNA, full insert sequence.,HLA-B-associated transcript 3	6	-0.474747	5.42784	0.86	0.86	0	1.19288	0.59	0.86	0.98	0.62	0.84	0.97	0.68	0.88	0.99	0.43	0.71	0.98	0.63	0.87	0.98	0.31	0.57	0.92	0.74	0.92	0.99	0.78	0.93	1	0.11	0.44	0.92	0.11	0.39	0.88	0.64	0.85	0.98	0.8	0.95	1	0.74	0.92	1
chr1:171461453:171461596:-@chr1:171458867:171458942:-@chr1:171455443:171455580:-	n/a	na/a	n/a	n/a	n/a	n/a	n/a	n/a	n/a	n/a	n/a	n/a	n/a	n/a	n/a	n/a	n/a	n/a	n/a	n/a	n/a	n/a	n/a	n/a	n/a	n/a	n/a	n/a	n/a	n/a	n/a	n/a	n/a	n/a	n/a	n/a	n/a	n/a	n/a	n/a	n/a	n/a	n/a	n/a	n/a	n/a	n/a	n/a	n/a
chr7:28028322:28028415:+@chr7:28035306|28035310:28035447:+	ENSMUSG00000003762	Adck4	aarF domain containing kinase 4	n/a	n/a	n/a	n/a	n/a	n/a	n/a	0.46	0.8	0.99	0.5	0.83	0.98	0.66	0.9	0.99	0.84	0.95	0.99	0.44	0.8	0.99	0.32	0.74	0.99	0.67	0.88	0.99	0.84	0.96	1	0.32	0.73	1	0.57	0.85	0.98	0.69	0.88	0.98	0.64	0.88	0.99	0.61	0.88	0.99
chr8:114059994:114061464:+@chr8:114133193:114133288:+@chr8:114143106:114143211:+	ENSMUSG00000033545	Znrf1	zinc and ring finger 1	n/a	n/a	n/a	n/a	n/a	n/a	n/a	0.91	0.97	1	0.93	0.98	1	0.91	0.97	1	0.89	0.96	0.99	0.89	0.96	1	0.9	0.97	1	0.92	0.97	1	0.89	0.97	1	0.89	0.97	1	0.9	0.97	1	0.88	0.96	0.99	0.8	0.95	1	0.78	0.93	0.99
chr7:148401732:148401839:+@chr7:148402620:148402750:+@chr7:148402899:148403874:+	ENSMUSG00000038618	Rassf7	Ras association (RalGDS/AF-6) domain family 7	n/a	n/a	n/a	n/a	n/a	n/a	n/a	n/a	n/a	n/a	n/a	n/a	n/a	0.38	0.79	0.99	n/a	n/a	n/a	n/a	n/a	n/a	n/a	n/a	n/a	n/a	n/a	n/a	n/a	n/a	n/a	n/a	n/a	n/a	n/a	n/a	n/a	n/a	n/a	n/a	n/a	n/a	n/a	n/a	n/a	n/a
chrX:20425669:20425745:+@chrX:20426238:20426282:+@chrX:20427053:20427208:+	ENSMUSG00000001127	Araf	Mus musculus Araf mRNA for Ras-binding protein DA-Raf, complete cds.,v-raf murine sarcoma 3611 viral oncogene,Araf protein.	n/a	n/a	n/a	n/a	n/a	n/a	n/a	0.01	0.04	0.1	0	0.02	0.07	0	0.03	0.08	0	0.02	0.08	0	0.04	0.12	0	0.02	0.07	0	0.01	0.04	0	0.01	0.04	0	0.02	0.06	0	0	0.02	0.02	0.08	0.17	0.01	0.08	0.21	0	0.04	0.14
chr10:79277930:79277986:+@chr10:79279537:79279668:+@chr10:79281786:79283668:+	ENSMUSG00000035863	Palm	full insert sequence.,paralemmin,8 days embryo whole body cDNA, clone:5730402P13 product:paralemmin, RIKEN full-length enriched library	-8	-0.525253	6.1895	0.81	0.72	-0.08	-1.20765	0.57	0.75	0.91	0.69	0.86	0.98	0.62	0.81	1	0.55	0.74	0.93	0.64	0.85	1	0.51	0.75	0.99	0.88	0.94	0.98	0.52	0.72	0.87	0.61	0.8	0.98	0.82	0.93	0.99	0.62	0.84	1	0.61	0.82	0.96	0.53	0.71	0.9
chr4:106991547:106991568:+@chr4:106991609:106991710:+	n/a	n/a	n/a	n/a	n/a	n/a	n/a	n/a	n/a	n/a	0.64	0.88	0.99	0.77	0.92	1	0.64	0.88	0.99	0.68	0.89	0.98	0.48	0.76	0.98	0.71	0.93	0.99	0.44	0.7	0.95	0.51	0.78	0.97	0.55	0.86	1	0.5	0.74	0.98	0.67	0.89	1	0.63	0.87	0.99	n/a	n/a	n/a
chr2:163470734:163470889:-@chr2:163464924|163465063:163464902:-	ENSMUSG00000017707	Serinc3	tumor differentially expressed protein 1	n/a	n/a	n/a	n/a	n/a	n/a	n/a	0.97	0.99	1	0.97	0.99	1	0.96	0.99	1	0.95	0.98	1	0.88	0.96	1	0.97	0.99	1	0.98	0.99	1	0.99	1	1	0.99	1	1	0.99	1	1	0.91	0.97	1	0.93	0.98	1	0.9	0.96	1
chr4:137179189:137179303:+@chr4:137181072|137181075:137181202:+	ENSMUSG00000043411	Usp48	ubiquitin specific protease 48	n/a	n/a	n/a	n/a	n/a	n/a	n/a	0.02	0.25	0.55	0.02	0.14	0.35	0	0.09	0.29	0.03	0.22	0.64	0	0.15	0.46	0.02	0.13	0.45	0.01	0.08	0.27	0.03	0.19	0.42	0.01	0.1	0.31	0.03	0.18	0.52	0.05	0.31	0.78	0.01	0.18	0.63	0.07	0.48	0.9
chr19:55987049:55987135:+@chr19:55991829|55991844:55991969:+	ENSMUSG00000024985	Tcf4,Tcf7l2	Transcription factor 7-like 2 (HMG box transcription factor 4) (T- cell-specific transcription factor 4) (TCF-4) (mTCF-4)., complete cds.,Mus musculus HMG-box transcription factor TCF4B (Tcf4) mRNA	n/a	n/a	n/a	n/a	n/a	n/a	n/a	0.01	0.16	0.52	0.14	0.36	0.69	0.22	0.61	0.98	0.16	0.43	0.73	n/a	n/a	n/a	0.01	0.23	0.66	0.05	0.25	0.59	0.03	0.22	0.63	0.03	0.45	0.82	0.12	0.46	0.94	0.05	0.18	0.47	0.03	0.21	0.53	0.02	0.3	0.79
chr7:52317795:52317901:+@chr7:52328860|52328864:52328934:+	ENSMUSG00000003421	AK219239	clone:1700007D14 product:unclassifiable,Mus musculus adult male testis cDNA, RIKEN full-length enriched library	n/a	n/a	n/a	n/a	n/a	n/a	n/a	0.39	0.78	0.99	0.51	0.78	0.96	0.56	0.84	0.98	0.48	0.8	0.99	0.83	0.94	0.99	0.83	0.95	1	0.85	0.94	1	0.34	0.66	0.99	0.7	0.91	0.99	0.69	0.9	1	0.61	0.88	0.99	0.25	0.66	0.95	0.51	0.81	0.97
chr6:114593118:114593172:+@chr6:114595526:114595673:+@chr6:114622996:114623162:+	ENSMUSG00000030314	Atg7	AGP7	n/a	n/a	n/a	n/a	n/a	n/a	n/a	0.01	0.07	0.25	0	0.06	0.19	0.01	0.11	0.39	0	0.07	0.21	0.01	0.14	0.52	0.01	0.11	0.38	0.02	0.11	0.36	0.02	0.08	0.18	0	0.1	0.38	0.03	0.11	0.24	0.01	0.1	0.29	0.02	0.19	0.55	0.06	0.44	0.97
chr11:87551669:87551775:+@chr11:87556210|87556298:87556353:+	ENSMUSG00000020485	Supt4h2,Supt4h1	clone:0710005G07 product:suppressor of Ty 4 homolog (S. cerevisiae),Mus musculus adult male brain cDNA, RIKEN full-length enriched library, full insert sequence.,suppressor of Ty 4 homolog 2	n/a	n/a	n/a	n/a	n/a	n/a	n/a	0	0.02	0.07	0	0.04	0.14	0.03	0.09	0.19	0	0.02	0.06	0.44	0.62	0.8	0	0.04	0.12	0.01	0.03	0.08	0	0.01	0.05	0	0.01	0.03	0	0.01	0.03	0	0.02	0.06	0	0.02	0.06	0	0.02	0.09
chr15:89305218:89305436:-@chr15:89304971:89305140:-	n/a	n/a	n/a	-1	0.040404	0.920246	0.26	0.12	-0.14	-1.13057	0.04	0.14	0.3	0.16	0.48	0.82	0.06	0.17	0.31	0.01	0.09	0.23	0.06	0.24	0.54	0.09	0.23	0.46	0.11	0.29	0.51	0.01	0.09	0.24	0.02	0.1	0.39	0.05	0.24	0.62	0.09	0.3	0.57	0.01	0.11	0.35	0.01	0.24	0.79
chr3:151880373:151880412:+@chr3:151880796|151880799:151880848:+	ENSMUSG00000028034	Fubp1	far upstream element (FUSE) binding protein 1	-7	-1.69697	12.8915	0.58	0.39	-0.19	-0.411358	0.5	0.78	0.96	0.07	0.38	0.72	0.17	0.59	0.88	0.04	0.21	0.5	0.01	0.18	0.56	0.13	0.32	0.55	0.19	0.42	0.71	0.48	0.74	0.94	0.06	0.17	0.32	0.23	0.42	0.68	0.02	0.27	0.69	0.24	0.45	0.72	0.09	0.34	0.72
chr1:93287184:93287240:-@chr1:93285023|93285041:93284922:-	ENSMUSG00000026309	Ilkap	Integrin-linked kinase-associated serine/threonine phosphatase 2C (EC 3.1.3.16) (ILKAP)., partial cds.,Mus musculus clone mouse1-1 putative protein phosphatase type 2C mRNA	n/a	n/a	n/a	n/a	n/a	n/a	n/a	0.55	0.8	0.95	0.72	0.88	0.99	0.34	0.61	0.83	0.74	0.9	0.98	0.07	0.36	0.72	0.64	0.86	0.98	0.46	0.69	0.96	0.21	0.47	0.77	0.25	0.68	0.98	0.32	0.67	0.96	0.59	0.82	0.98	0.55	0.82	0.99	0.12	0.49	0.9
chr18:67461830:67461963:+@chr18:67466322|67466325:67466429:+	ENSMUSG00000024525	Impa2	inositol (myo)-1(or 4)-monophosphatase 2	n/a	n/a	n/a	n/a	n/a	n/a	n/a	0.04	0.4	0.96	0.09	0.55	0.96	0.02	0.35	0.71	0	0.13	0.36	0.03	0.15	0.45	0.01	0.09	0.28	0.02	0.21	0.65	0.01	0.31	0.77	0.03	0.17	0.54	0	0.15	0.48	0.02	0.21	0.63	n/a	n/a	n/a	n/a	n/a	n/a
chr1:88426031:88426057:+@chr1:88426112:88426127:+	n/a	n/a	n/a	n/a	n/a	n/a	n/a	n/a	n/a	n/a	0.85	0.95	1	0.85	0.96	1	0.85	0.96	1	0.79	0.93	0.99	0.84	0.95	1	0.75	0.91	0.99	0.86	0.95	0.99	0.95	0.98	1	0.89	0.97	1	0.92	0.98	1	0.85	0.95	0.99	0.79	0.93	0.99	0.79	0.94	1
chr7:72444699:72444616|72444556:-@chr7:72441044:72442553:-	ENSMUSG00000030516	Tjp1	tight junction protein 1	-14	-0.151515	19.5595	0.87	0.72	-0.14	-0.708019	0.79	0.88	0.95	0.76	0.85	0.93	0.73	0.87	0.96	0.73	0.92	1	0.85	0.95	0.99	0.69	0.87	0.98	0.72	0.86	0.97	0.76	0.88	0.98	0.18	0.33	0.53	0.33	0.5	0.68	0.86	0.95	0.99	0.8	0.94	1	0.68	0.83	0.94
chr3:151402284:151402455:-@chr3:151401187:151401287:-@chr3:151393886:151395517:-	ENSMUSG00000028037	Ifi44	interferon-induced protein 44	-1	-0.0808081	0.906506	0.71	0.51	-0.2	-1.01399	0.25	0.73	0.99	0.43	0.77	0.97	0.13	0.63	0.94	0.12	0.61	0.97	0.53	0.82	1	0.19	0.61	0.96	0.15	0.61	0.94	0.12	0.53	0.94	0.03	0.38	0.8	0.09	0.44	0.92	0.08	0.54	1	0.22	0.58	1	0.03	0.5	0.92
chr2:152839746:152839866:-@chr2:152838188|152838191:152838117:-	ENSMUSG00000027472	Pdrg1	p53 and DNA damage regulated 1	n/a	n/a	n/a	n/a	n/a	n/a	n/a	0.8	0.95	1	0.89	0.97	1	0.79	0.93	1	0.92	0.97	1	0.78	0.93	1	0.89	0.97	1	0.85	0.96	1	0.85	0.96	1	0.93	0.98	1	0.93	0.98	1	0.66	0.87	0.97	0.85	0.96	1	0.86	0.94	1
chr6:120284787:120284935:-@chr6:120281830:120282049:-@chr6:120279352:120279477:-	ENSMUSG00000030177	Ccdc77	full insert sequence., clone:2400002C23 product:hypothetical protein,coiled-coil domain containing 77,Mus musculus ES cells cDNA, RIKEN full-length enriched library	n/a	n/a	n/a	n/a	n/a	n/a	n/a	0.14	0.53	0.93	0.18	0.46	0.83	0.09	0.36	0.84	0.15	0.45	0.87	n/a	n/a	n/a	0.2	0.6	0.98	0.47	0.8	1	0.22	0.43	0.72	0.47	0.77	0.98	0.4	0.67	0.92	0.01	0.14	0.44	0.16	0.4	0.8	0.3	0.52	0.78
chr16:13819344:13819529:+@chr16:13826976|13827153:13827218:+	ENSMUSG00000022681	Ntan1	N-terminal Asn amidase	2	-0.030303	1.4802	0.59	0.83	0.24	1.37164	0.36	0.66	0.91	0.24	0.46	0.79	0.37	0.66	0.92	0.7	0.89	0.99	0.48	0.83	0.99	0.42	0.73	0.96	0.24	0.55	0.84	0.3	0.56	0.86	0.53	0.85	0.99	0.57	0.85	0.97	0.41	0.73	0.97	0.47	0.8	0.98	0.4	0.68	0.91
chr6:83864347:83864473:+@chr6:83878647:83880159:+@chr6:83884943:83885004:+	ENSMUSG00000030016	Znf638,Zfml	zinc finger protein 638,Zinc finger protein 638 (Nuclear protein 220) (Zinc-finger matrin-like protein).	-3	-0.10101	3.70774	0.88	0.85	-0.04	-0.781874	0.73	0.91	0.99	0.65	0.88	0.99	0.64	0.86	0.98	0.65	0.89	1	0.41	0.66	0.92	0.75	0.91	0.99	0.73	0.93	1	0.62	0.82	0.98	0.78	0.92	0.99	0.85	0.95	0.99	0.54	0.79	0.96	0.71	0.91	0.98	0.53	0.78	0.96
chr16:23108661:23108924:+@chr16:23110058:23110226:+@chr16:23110307:23110416:+	ENSMUSG00000022884	Eif4a2	full insert sequence.,Mus musculus 0 day neonate head cDNA,eukaryotic translation initiation factor 4A2, clone:4833432N07 product:EUKARYOTIC INITIATION FACTOR 4A-II (EIF-4A-II) (EIF4A-II), RIKEN full-length enriched library	n/a	n/a	n/a	n/a	n/a	n/a	n/a	0.98	1	1	0.98	1	1	0.98	0.99	1	0.99	1	1	0.98	0.99	1	0.99	1	1	0.99	1	1	0.96	0.99	1	0.99	1	1	0.98	0.99	1	0.98	0.99	1	0.98	1	1	0.98	0.99	1
chr10:80007505:80008581:-@chr10:80007165|80007189:80007028:-	ENSMUSG00000047417	Rexo1	transcription elongation factor B polypeptide 3	3	-0.010101	2.17653	0.16	0.3	0.14	1.38298	0.03	0.2	0.54	0.02	0.14	0.37	0.01	0.14	0.38	0.02	0.13	0.3	0.03	0.27	0.73	0	0.2	0.66	0.01	0.08	0.33	0.01	0.12	0.39	0.06	0.17	0.37	0.04	0.17	0.43	0.01	0.12	0.34	0.01	0.18	0.53	0.12	0.5	0.94
chr16:94881104:94881300:+@chr16:94885349|94885376:94885468:+	ENSMUSG00000022897	Dyrk1a	dual-specificity tyrosine-(Y)-phosphorylation, full insert sequence., clone:C130005F20 product:dual-specificity tyrosine-(Y)-phosphorylation regulated kinase 1a,Mus musculus 16 days embryo head cDNA, RIKEN full-length enriched library	7	0.141414	4.01766	0.39	0.47	0.08	1.70711	0.1	0.23	0.4	0.28	0.45	0.64	0.3	0.49	0.72	0.21	0.41	0.61	0.19	0.42	0.69	0.13	0.24	0.39	0.23	0.43	0.68	0.12	0.27	0.45	0.24	0.55	0.85	0.19	0.45	0.71	0.16	0.36	0.6	0.33	0.53	0.75	0.19	0.42	0.67
chr7:109254766:109254879:+@chr7:109255181|109255853:109255946:+	ENSMUSG00000030996	Art1	ADP-ribosyltransferase 1	-7	2.06061	10.5781	0.99	0.89	-0.1	-0.856547	0.97	0.99	1	0.97	0.99	1	0.98	0.99	1	0.91	0.97	1	0.63	0.75	0.88	0.9	0.97	1	0.98	0.99	1	0.98	0.99	1	0.94	0.98	1	0.95	0.98	1	0.97	0.99	1	0.81	0.91	0.99	0.93	0.98	1
chr4:11119828:11119864:+@chr4:11119962|11119965:11120058:+	ENSMUSG00000028212	Ccne2	cyclin E2 isoform 2	n/a	n/a	n/a	n/a	n/a	n/a	n/a	n/a	n/a	n/a	n/a	n/a	n/a	n/a	n/a	n/a	n/a	n/a	n/a	n/a	n/a	n/a	n/a	n/a	n/a	n/a	n/a	n/a	0.02	0.45	0.93	n/a	n/a	n/a	0.04	0.4	0.94	n/a	n/a	n/a	n/a	n/a	n/a	n/a	n/a	n/a
chr4:130224840:130225213|130225118:+@chr4:130256957:130257025:+	ENSMUSG00000028580	Pum1	pumilio 1,Pumilio homolog 1.	n/a	n/a	n/a	n/a	n/a	n/a	n/a	0.83	0.94	0.99	0.8	0.93	0.99	0.69	0.9	0.99	0.89	0.96	1	0.75	0.9	1	0.92	0.98	1	0.74	0.91	0.99	0.76	0.9	0.97	0.68	0.84	0.97	0.86	0.95	1	0.72	0.89	0.99	0.88	0.97	1	0.74	0.92	0.99
chr15:54713685:54713757:-@chr15:54709331:54709486:-@chr15:54707207:54707315:-	ENSMUSG00000022425	Npps2,Enpp2	complete cds.,ectonucleotide pyrophosphatase/phosphodiesterase,Mus musculus phosphodiesterase I/nucleotide pyrophosphatase (Npps2) mRNA	n/a	n/a	n/a	n/a	n/a	n/a	n/a	0.04	0.16	0.39	0.01	0.07	0.21	n/a	n/a	n/a	0.01	0.07	0.21	n/a	n/a	n/a	n/a	n/a	n/a	0	0.05	0.14	0.05	0.18	0.38	0	0.02	0.06	0	0.02	0.07	n/a	n/a	n/a	n/a	n/a	n/a	0	0.12	0.31
chr16:17576733:17576816:-@chr16:17576170:17576172:-@chr16:17574574:17576058:-	n/a	n/a	n/a	n/a	n/a	n/a	n/a	n/a	n/a	n/a	0.02	0.3	0.74	0.03	0.33	0.72	0.01	0.36	0.88	0.04	0.48	0.92	n/a	n/a	n/a	0.04	0.53	0.94	0.03	0.56	0.97	0.04	0.24	0.61	0.03	0.28	0.69	0.01	0.18	0.44	0.1	0.48	0.89	0.15	0.53	0.95	n/a	n/a	n/a
chr3:120983259:120983370:-@chr3:120983036:120983143:-@chr3:120949920:120950004:-@chr3:120938588:120938682:-	ENSMUSG00000028132	Tmem56	transmembrane protein 56	n/a	n/a	n/a	n/a	n/a	n/a	n/a	0.1	0.46	0.9	0.05	0.41	0.87	n/a	n/a	n/a	n/a	n/a	n/a	n/a	n/a	n/a	n/a	n/a	n/a	n/a	n/a	n/a	0.15	0.56	0.96	n/a	n/a	n/a	n/a	n/a	n/a	0.08	0.46	0.94	n/a	n/a	n/a	0.06	0.38	0.9
chr8:125789214:125789331:+@chr8:125791405|125791500:125791599:+	ENSMUSG00000001065	Zfp276	Adult male testis cDNA,zinc finger protein 276, clone:4932443F20 product:zinc finger protein (C2H2 type) 276, RIKEN full-length enriched library, complete cds., full insert sequence.,Mus musculus zinc finger protein 276 C2H2 type (Zfp276) mRNA	n/a	n/a	n/a	n/a	n/a	n/a	n/a	0.01	0.08	0.21	0.09	0.23	0.43	0.02	0.09	0.24	0.01	0.13	0.34	0.01	0.12	0.39	0.17	0.52	0.89	0.09	0.26	0.44	0.09	0.24	0.46	0.07	0.34	0.88	0.1	0.3	0.52	0.04	0.15	0.3	0	0.06	0.18	0.07	0.25	0.49
chr9:123626644:123626746:-@chr9:123624418:123624538:-@chr9:123621548:123621742:-	ENSMUSG00000025245	Lztfl1	leucine zipper transcription factor-like 1,Mus musculus mRNA for leucine zipper transcription factor-like 1 (Lztfl1 gene).	6	0.959596	14.0482	0.67	0.61	-0.05	0.358794	0.48	0.7	0.91	0.27	0.49	0.76	0.57	0.81	0.99	0.6	0.81	0.98	0.39	0.71	0.96	0.26	0.51	0.83	0.57	0.79	1	0.37	0.65	0.98	0.07	0.12	0.17	0.08	0.13	0.19	0.45	0.74	0.96	0.55	0.85	0.99	0.45	0.75	0.95
chr11:116704258:116705088:+@chr11:116707077:116707259:+@chr11:116709568:116709672:+	ENSMUSG00000020815	1110005A03Rik	hypothetical protein LOC74319, full insert sequence., clone:1110005A03 product:hypothetical S-adenosyl-L-methionine-dependent methyltransferases structure containing protein,Mus musculus 18-day embryo whole body cDNA, RIKEN full-length enriched library	40	-1.37374	18.7334	0.25	0.58	0.33	2.20855	0.14	0.29	0.52	0.06	0.15	0.3	0.17	0.32	0.52	0.11	0.21	0.34	0.49	0.74	0.91	0.09	0.2	0.34	0.35	0.52	0.69	0.11	0.19	0.3	0.46	0.7	0.89	0.3	0.44	0.59	0.09	0.2	0.35	0.48	0.69	0.95	0.18	0.39	0.65
chr7:3582160:3582349|3582344:+@chr7:3582447:3583061:+	ENSMUSG00000008373	n/a	n/a	n/a	n/a	n/a	n/a	n/a	n/a	n/a	0	0.1	0.38	0.01	0.06	0.2	0.01	0.08	0.25	0	0.05	0.14	0.01	0.16	0.55	0.01	0.12	0.35	0.01	0.06	0.2	0	0.04	0.15	0	0.04	0.12	0.01	0.07	0.19	0.01	0.07	0.22	0.01	0.09	0.27	0.02	0.1	0.29
chr1:188456337:188456447:-@chr1:188454551|188454666:188454489:-	ENSMUSG00000039239	Tgfb2	beta 2,transforming growth factor	n/a	n/a	n/a	n/a	n/a	n/a	n/a	0.45	0.75	0.97	0.32	0.67	0.95	0.48	0.77	0.95	0.36	0.65	0.93	n/a	n/a	n/a	0.28	0.62	0.93	0.5	0.82	0.99	0.63	0.85	1	0.21	0.56	0.91	0.5	0.83	0.99	0.61	0.84	0.98	n/a	n/a	n/a	n/a	n/a	n/a
chr17:48549339:48549562:+@chr17:48550150|48550153:48550229:+	ENSMUSG00000040771	AI314976	hypothetical protein LOC106821	n/a	n/a	n/a	n/a	n/a	n/a	n/a	0.03	0.24	0.57	0.03	0.51	0.98	0.1	0.65	0.99	0.05	0.6	0.99	0.03	0.48	0.93	0.03	0.26	0.73	0.06	0.35	0.79	0.01	0.24	0.74	0.02	0.23	0.62	0.01	0.21	0.61	0.1	0.36	0.77	0.15	0.52	0.81	0.05	0.45	0.94
chr15:27592094:27592243:-@chr15:27589745|27589773:27589645:-	ENSMUSG00000056069	BC052328	clone:9830126M18 product:hypothetical protein,Mus musculus adult male bone cDNA, full insert sequence.,hypothetical protein LOC223433, RIKEN full-length enriched library	n/a	n/a	n/a	n/a	n/a	n/a	n/a	0.07	0.55	0.98	n/a	n/a	n/a	n/a	n/a	n/a	n/a	n/a	n/a	n/a	n/a	n/a	n/a	n/a	n/a	n/a	n/a	n/a	0.29	0.69	0.95	0.27	0.71	0.98	n/a	n/a	n/a	n/a	n/a	n/a	n/a	n/a	n/a	n/a	n/a	n/a
chr2:29640473:29640547:-@chr2:29638832:29638893:-@chr2:29637640:29637721:-	ENSMUSG00000039826	Trub2	full insert sequence., clone:A830056O18 product:hypothetical protein,Mus musculus 10 days neonate cortex cDNA,TruB pseudouridine (psi) synthase homolog 2, RIKEN full-length enriched library	n/a	n/a	n/a	n/a	n/a	n/a	n/a	0.46	0.74	0.94	0.72	0.91	1	0.62	0.84	0.97	0.57	0.79	0.96	0.42	0.73	0.97	0.69	0.89	0.98	0.65	0.84	0.96	0.55	0.74	0.92	0.52	0.75	0.92	0.74	0.91	0.99	0.7	0.89	0.99	0.47	0.76	0.99	0.31	0.64	0.95
chr7:130287264:130287351:+@chr7:130295678:130295699:+@chr7:130306008:130306391:+	ENSMUSG00000052707	Tnrc6a	full insert sequence.,Mus musculus adult male small intestine cDNA, clone:2010321I05 product:unclassifiable, RIKEN full-length enriched library,trinucleotide repeat containing 6A	n/a	n/a	n/a	n/a	n/a	n/a	n/a	0.08	0.42	0.92	0.36	0.69	0.96	0.46	0.76	0.95	0.61	0.9	0.99	0.46	0.79	0.96	0.66	0.89	1	0.77	0.93	1	0.62	0.86	0.97	0.81	0.94	1	0.87	0.95	1	0.14	0.62	0.96	0.19	0.57	0.92	0.5	0.8	1
chr14:68346707:68346803:+@chr14:68347281:68347294:+@chr14:68347408:68347466:+	ENSMUSG00000034327	Kctd9	clone:E030043O13 product:hypothetical K+ channel tetramerisation domain containing protein, RIKEN full-length enriched library,potassium channel tetramerisation domain,BTB/POZ domain-containing protein KCTD9., full insert sequence.,Mus musculus 0 day neonate lung cDNA	n/a	n/a	n/a	n/a	n/a	n/a	n/a	0.01	0.06	0.16	0	0.05	0.18	0	0.05	0.16	0.03	0.14	0.31	0.01	0.09	0.26	0.01	0.06	0.15	0.03	0.07	0.15	0	0.03	0.11	0.01	0.03	0.08	0.02	0.06	0.11	0	0.06	0.19	0.04	0.13	0.26	0	0.05	0.22
chr1:134013173:134013278:-@chr1:134013024:134013066:-	n/a	n/a	n/a	n/a	n/a	n/a	n/a	n/a	n/a	n/a	0.01	0.05	0.11	0.02	0.05	0.15	0.03	0.11	0.22	0	0.02	0.08	0.03	0.15	0.38	0	0.01	0.05	0.01	0.03	0.09	0.02	0.05	0.13	0.01	0.03	0.08	0.02	0.04	0.08	0.08	0.18	0.32	0.07	0.17	0.33	0.02	0.1	0.24
chr9:86933561:86933590:+@chr9:86935214|86935217:86935301:+	ENSMUSG00000032872	Cyb5r4,AK214583	based on BLAT search., strand:minus,Mus musculus cDNA, clone:Y0G0102E02, reference:ENSEMBL:Mouse-Transcript-ENST:ENSMUST00000050631,cytochrome b5 reductase 4	n/a	n/a	n/a	n/a	n/a	n/a	n/a	0.01	0.09	0.25	0.01	0.1	0.26	0.01	0.07	0.24	0	0.06	0.2	0.01	0.06	0.17	0	0.08	0.24	0.01	0.09	0.28	0	0.08	0.25	0	0.02	0.05	0	0.02	0.05	0.01	0.1	0.31	0.01	0.13	0.46	0	0.15	0.43
chr3:94290716:94291206:+@chr3:94291625|94291709:94291774:+	ENSMUSG00000028137	Celf3,Tnrc4	CUG-BP and ETR-3 like factor 3, clone:4930415M08 product:RNA-BINDING PROTEIN BRUNOL1 (FRAGMENT) homolog [Homo sapiens], full insert sequence.,Mus musculus adult male testis cDNA, RIKEN full-length enriched library	n/a	n/a	n/a	n/a	n/a	n/a	n/a	n/a	n/a	n/a	n/a	n/a	n/a	n/a	n/a	n/a	n/a	n/a	n/a	n/a	n/a	n/a	n/a	n/a	n/a	n/a	n/a	n/a	n/a	n/a	n/a	n/a	n/a	n/a	n/a	n/a	n/a	n/a	n/a	n/a	n/a	n/a	n/a	n/a	n/a	n/a
chr11:74723703:74723822:-@chr11:74723196:74723270:-@chr11:74722498:74722707:-	ENSMUSG00000001323	n/a	Mus musculus Srr mRNA for serine racemase isoform 4,serine racemase,Mus musculus Srr mRNA for serine racemase isoform 1, partial cds.	-26	-2.94949	11.7811	0.89	0.7	-0.19	-1.95656	0.71	0.9	0.99	0.68	0.89	0.99	0.71	0.88	0.99	0.5	0.76	0.98	0.71	0.89	0.99	0.63	0.87	0.99	0.8	0.92	0.99	0.81	0.93	0.99	0.67	0.87	0.99	0.82	0.93	0.99	0.62	0.84	0.98	0.41	0.68	0.99	0.41	0.67	0.97
chr8:72921645:72921853:-@chr8:72916821:72916954:-	n/a	n/a	n/a	n/a	n/a	n/a	n/a	n/a	n/a	n/a	0.17	0.27	0.44	0.12	0.17	0.25	0.08	0.11	0.16	0.06	0.1	0.15	0.11	0.2	0.32	0.09	0.13	0.19	0.08	0.12	0.18	0.1	0.14	0.2	0.1	0.15	0.23	0.07	0.11	0.15	0.07	0.11	0.15	0.1	0.17	0.29	0.04	0.08	0.13
chr13:49703357:49703495:+@chr13:49704210:49704302:+@chr13:49704483:49704726:+	n/a	n/a	n/a	n/a	n/a	n/a	n/a	n/a	n/a	n/a	0	0.03	0.09	0	0.04	0.11	0	0.04	0.15	0	0.02	0.07	0	0.02	0.08	0	0.02	0.06	0	0.02	0.05	0	0.02	0.07	0.01	0.04	0.08	0	0.02	0.05	0.01	0.05	0.13	0	0.04	0.14	0	0.05	0.2
chr4:124470418:124470653:+@chr4:124470846:124470898:+@chr4:124472600:124472713:+	ENSMUSG00000028894	Inpp5b	Adult male lung cDNA, RIKEN full-length enriched library, clone:1200004L23 product:inositol polyphosphate-5-phosphatase, full insert sequence., 75 kDa,inositol polyphosphate-5-phosphatase B	-5	-0.010101	4.58256	0.24	0.24	-0.01	-1.08889	0.1	0.31	0.69	0.03	0.27	0.63	0	0.15	0.55	0.01	0.11	0.47	0.41	0.69	0.93	0.06	0.3	0.65	0.15	0.33	0.56	0.15	0.53	0.94	0.14	0.33	0.6	0.07	0.21	0.44	0.13	0.43	0.73	0.27	0.6	0.92	0.05	0.39	0.82
chr5:24949638:24949726:-@chr5:24920841|24920844:24920703:-	ENSMUSG00000038056	Mll3,mKIAA1506	myeloid/lymphoid or mixed-lineage leukemia 3, full insert sequence.,Mus musculus 9.5 days embryo parthenogenote cDNA, clone:B130006H11 product:hypothetical HMG-I and HMG-Y DNA-binding domain (A+T-hook)/PHD-finger/RING finger containing protein, RIKEN full-length enriched library	n/a	n/a	n/a	n/a	n/a	n/a	n/a	n/a	n/a	n/a	n/a	n/a	n/a	n/a	n/a	n/a	0.06	0.54	0.92	n/a	n/a	n/a	0.04	0.53	0.92	0.02	0.29	0.69	0.08	0.57	0.93	0.03	0.21	0.56	0.05	0.29	0.6	n/a	n/a	n/a	0.05	0.51	0.94	0.05	0.33	0.81
chr18:60988019:60988213:-@chr18:60986994:60987101:-@chr18:60982458:60982644:-	ENSMUSG00000024613	Tcof1	treacle	2	0.414141	5.27814	0.45	0.42	-0.03	0.300458	0.22	0.43	0.71	0.25	0.43	0.63	0.31	0.5	0.68	0.15	0.28	0.42	0.18	0.37	0.61	0.12	0.26	0.44	0.44	0.62	0.79	0.15	0.32	0.56	0.26	0.53	0.8	0.37	0.66	0.95	0.35	0.58	0.81	0.02	0.17	0.42	0.36	0.7	0.97
chr15:102047323:102047528:-@chr15:102046903:102047063:-@chr15:102046423:102046698:-	ENSMUSG00000001281	Itgb7	integrin beta 7	n/a	n/a	n/a	n/a	n/a	n/a	n/a	n/a	n/a	n/a	n/a	n/a	n/a	n/a	n/a	n/a	n/a	n/a	n/a	n/a	n/a	n/a	n/a	n/a	n/a	n/a	n/a	n/a	0.6	0.87	1	0.44	0.78	0.97	0.42	0.74	0.96	n/a	n/a	n/a	n/a	n/a	n/a	n/a	n/a	n/a
chr7:140951083:140951596:-@chr7:140940526:140940719:-@chr7:140934112:140934484:-	ENSMUSG00000030986	Dhx32	helicase DDX32	n/a	n/a	n/a	n/a	n/a	n/a	n/a	0.86	0.95	1	0.9	0.97	1	0.82	0.92	0.99	0.88	0.96	1	0.76	0.91	0.99	0.8	0.94	0.99	0.93	0.98	1	0.92	0.98	1	0.92	0.97	1	0.93	0.97	1	0.82	0.94	1	0.79	0.92	0.99	0.83	0.93	1
chr1:157626848:157627068:-@chr1:157625285:157625981:-	n/a	n/a	n/a	-70	2.25253	22.8355	0.52	0.22	-0.3	-3.16404	0.41	0.47	0.53	0.48	0.55	0.63	0.45	0.53	0.62	0.5	0.58	0.66	0.45	0.56	0.67	0.54	0.62	0.69	0.51	0.59	0.67	0.57	0.63	0.7	0.59	0.68	0.77	0.75	0.82	0.88	0.47	0.54	0.6	0.48	0.57	0.66	0.47	0.56	0.66
chr6:124711666:124711724:-@chr6:124710071:124711380:-	n/a	n/a	n/a	-1	0.0606061	0.896888	0.28	0.09	-0.19	-1.18254	0	0.09	0.26	0.12	0.36	0.76	0.13	0.39	0.68	0.14	0.39	0.88	0	0.07	0.23	0.02	0.11	0.3	0.08	0.21	0.43	0.05	0.15	0.34	0.01	0.09	0.29	0.05	0.17	0.41	0.06	0.29	0.74	0.01	0.22	0.55	0.09	0.37	0.88
chr7:26169799:26169984:-@chr7:26169392:26169683:-@chr7:26168472:26168699:-	ENSMUSG00000003123	Lipe	clone:4931402D16 product:lipase, hormone sensitive isoform 1,Mus musculus adult male testis cDNA, RIKEN full-length enriched library, full insert sequence., hormone sensitive,lipase	7	0.949495	7.81913	0.88	0.94	0.06	0.773808	0.8	0.91	0.98	0.64	0.79	0.95	0.86	0.95	1	0.87	0.96	1	0.62	0.8	0.98	0.69	0.82	0.92	0.64	0.78	0.92	0.63	0.77	0.93	0.42	0.55	0.71	0.59	0.75	0.95	0.72	0.88	0.97	0.74	0.88	0.98	0.63	0.86	0.99
chr11:29032845:29032905:+@chr11:29033852|29033856:29033926:+	ENSMUSG00000020464	Pnpt1	polyribonucleotide nucleotidyltransferase 1	n/a	n/a	n/a	n/a	n/a	n/a	n/a	0.46	0.77	0.95	0.42	0.79	0.98	0.35	0.77	0.99	0.29	0.71	0.98	0.32	0.77	0.98	0.69	0.9	0.99	0.79	0.94	1	0.46	0.79	0.97	0.71	0.9	0.99	0.64	0.89	1	0.61	0.86	0.99	n/a	n/a	n/a	n/a	n/a	n/a
chr9:63083096:63083143:-@chr9:63065146:63065172:-@chr9:63064075:63064832:-	ENSMUSG00000058444	Map2k5	full insert sequence., clone:3000002B10 product:mitogen activated protein kinase kinase 5, RIKEN full-length enriched library,12 days embryo head cDNA,mitogen activated protein kinase kinase 5	n/a	n/a	n/a	n/a	n/a	n/a	n/a	0.74	0.91	1	0.61	0.92	1	0.63	0.89	0.99	0.53	0.86	0.99	0.4	0.77	0.97	0.53	0.82	0.98	0.46	0.81	0.98	0.5	0.82	1	0.41	0.78	0.98	0.55	0.83	0.98	0.65	0.86	0.97	0.72	0.9	1	0.26	0.74	0.99
chr11:100629532:100629603:-@chr11:100629328:100629461:-	n/a	n/a	n/a	n/a	n/a	n/a	n/a	n/a	n/a	n/a	0.09	0.27	0.54	0.05	0.15	0.31	0	0.04	0.12	0	0.18	0.69	0	0.05	0.14	0.01	0.12	0.34	0.03	0.14	0.3	0.04	0.16	0.34	n/a	n/a	n/a	n/a	n/a	n/a	0	0.04	0.13	0.01	0.08	0.19	0.03	0.17	0.41
chr1:182597456:182597589:+@chr1:182598895|182598897:182599014:+	ENSMUSG00000058729	Bara,Lin9	partial cds.,Mus musculus type I interferon receptor beta chain-associated protein (Bara) mRNA,type I interferon receptor beta chain-associated	n/a	n/a	n/a	n/a	n/a	n/a	n/a	n/a	n/a	n/a	n/a	n/a	n/a	n/a	n/a	n/a	n/a	n/a	n/a	n/a	n/a	n/a	0.24	0.67	0.98	n/a	n/a	n/a	n/a	n/a	n/a	n/a	n/a	n/a	n/a	n/a	n/a	n/a	n/a	n/a	n/a	n/a	n/a	n/a	n/a	n/a
chr4:148480261:148480422|148480331:+@chr4:148481878:148482020:+	ENSMUSG00000028974	Dffa	DNA fragmentation factor	-3	2.55556	15.4189	0.79	0.61	-0.18	-0.360309	0.4	0.7	0.99	0.67	0.86	0.99	0.61	0.81	0.96	0.27	0.58	0.98	0.6	0.83	1	0.48	0.76	0.95	0.66	0.87	1	0.27	0.38	0.52	0.16	0.26	0.4	0.19	0.29	0.41	0.65	0.87	0.99	0.41	0.7	0.92	0.52	0.77	0.96
chr12:85766086:85766230:+@chr12:85767658:85768151:+@chr12:85769293:85769394:+	ENSMUSG00000057265	2900006K08Rik	hypothetical protein LOC72873	n/a	n/a	n/a	n/a	n/a	n/a	n/a	n/a	n/a	n/a	n/a	n/a	n/a	n/a	n/a	n/a	n/a	n/a	n/a	n/a	n/a	n/a	n/a	n/a	n/a	n/a	n/a	n/a	n/a	n/a	n/a	n/a	n/a	n/a	0.29	0.6	0.91	n/a	n/a	n/a	n/a	n/a	n/a	n/a	n/a	n/a
chr16:98230109:98230169:+@chr16:98231284:98231333:+@chr16:98236831:98236884:+	ENSMUSG00000079490	BC056174	clone:B230307C23 product:similar to KRUPPEL-RELATED ZINC FINGER PROTEIN F80-L [Mus musculus],Mus musculus adult male corpora quadrigemina cDNA, RIKEN full-length enriched library	n/a	n/a	n/a	n/a	n/a	n/a	n/a	n/a	n/a	n/a	n/a	n/a	n/a	n/a	n/a	n/a	0.04	0.38	0.97	n/a	n/a	n/a	0.01	0.16	0.53	0.05	0.29	0.73	0.03	0.2	0.61	0.12	0.45	0.8	0.04	0.29	0.69	n/a	n/a	n/a	0.01	0.22	0.52	0.01	0.3	0.8
chr5:3812742:3812857:+@chr5:3813051:3813194:+@chr5:3818527:3818683:+	ENSMUSG00000000600	Krit1,BC099422	RIKEN full-length enriched library, ankyrin repeat containing,Mus musculus adult male small intestine cDNA, clone:2010007K12 product:hypothetical protein,KRIT1, full insert sequence.	n/a	n/a	n/a	n/a	n/a	n/a	n/a	0.66	0.83	0.96	0.68	0.88	0.99	0.41	0.71	0.97	0.68	0.88	0.99	0.8	0.94	1	0.72	0.9	0.99	0.84	0.94	0.99	0.77	0.92	0.99	0.86	0.95	1	0.83	0.94	0.99	0.52	0.79	0.98	0.71	0.91	0.99	0.76	0.92	1
chr18:12327226:12327411:+@chr18:12327742:12327818:+@chr18:12330058:12330142:+	ENSMUSG00000024410	3110002H16Rik	colon cancer-associated protein Mic1 homolog	n/a	n/a	n/a	n/a	n/a	n/a	n/a	0.8	0.92	0.99	0.76	0.93	0.99	0.8	0.94	1	0.65	0.9	0.99	0.62	0.86	0.96	0.9	0.98	1	0.83	0.94	1	0.92	0.98	1	0.89	0.97	1	0.91	0.97	1	0.65	0.88	0.98	0.65	0.92	1	0.6	0.88	0.99
chr2:164658371:164658696:+@chr2:164659224:164659350:+@chr2:164659530:164659931:+	ENSMUSG00000017760	Ctsa	cathepsin A isoform b,cathepsin A isoform a	92	1.58586	24.5283	0.33	0.84	0.51	3.68612	0.24	0.31	0.39	0.29	0.36	0.45	0.25	0.32	0.4	0.18	0.27	0.37	0.14	0.23	0.35	0.24	0.35	0.47	0.34	0.43	0.52	0.31	0.41	0.51	0.54	0.69	0.83	0.39	0.51	0.63	0.4	0.49	0.58	0.27	0.36	0.46	0.32	0.44	0.56
chr2:60071956:60073054:+@chr2:60073138:60073160:+@chr2:60074811:60074983:+	ENSMUSG00000026977	2014-03-07	membrane-associated ring finger (C3HC4) 7, complete cds.,Mus musculus axotrophin mRNA	n/a	n/a	n/a	n/a	n/a	n/a	n/a	0.01	0.17	0.57	0	0.25	0.75	0.03	0.35	0.92	0.02	0.1	0.25	0.01	0.14	0.48	0.02	0.11	0.32	0	0.09	0.27	0.01	0.13	0.51	0.01	0.21	0.67	0.01	0.09	0.27	0.03	0.27	0.73	0.01	0.12	0.32	0.02	0.13	0.42
chr7:95426595:95426884:+@chr7:95429897|95429900:95430042:+	ENSMUSG00000030560	Ctsc	clone:I830078D18 product:cathepsin C,Bone marrow macrophage cDNA, RIKEN full-length enriched library	n/a	n/a	n/a	n/a	n/a	n/a	n/a	0.45	0.79	0.98	0.38	0.76	0.98	0.42	0.73	0.97	0.39	0.76	0.98	0.16	0.56	0.93	0.03	0.48	0.93	0.56	0.81	0.98	0.39	0.78	0.97	0.18	0.58	0.93	0.13	0.57	0.91	0.08	0.61	0.98	0.19	0.67	0.98	n/a	n/a	n/a
chr11:83785054:83785094:+@chr11:83790582|83790585:83790703:+	ENSMUSG00000034940	Ap1gbp1	AP1 gamma subunit binding protein 1	n/a	n/a	n/a	n/a	n/a	n/a	n/a	0.27	0.59	0.87	0.13	0.57	0.96	0.28	0.62	0.87	0.22	0.48	0.73	0.41	0.77	0.96	0.03	0.39	0.85	0.15	0.36	0.65	0.11	0.39	0.84	0.08	0.27	0.59	0.17	0.53	0.83	0.05	0.3	0.67	0.04	0.29	0.71	0.13	0.42	0.83
chr11:116702383:116702669:-@chr11:116701762:116701859:-@chr11:116700283:116700442:-	ENSMUSG00000056962	mKIAA0585,Jmjd6,Ptdsr	Mus musculus apoptotic cell clearance receptor PtdSerR mRNA, complete cds.,jumonji domain containing 6,Protein PTDSR (Phosphatidylserine receptor) (Apoptotic cell clearance receptor PtdSerR).	6	0.222222	3.65578	0.79	0.77	-0.01	1.58045	0.58	0.83	0.98	0.49	0.7	0.92	0.6	0.83	0.99	0.58	0.81	0.97	0.5	0.78	0.98	0.43	0.62	0.81	0.69	0.84	0.95	0.36	0.54	0.75	0.64	0.83	0.99	0.66	0.82	0.96	0.51	0.73	0.92	0.68	0.87	0.98	0.73	0.91	0.99
chr17:13944284:13944399:+@chr17:13945939|13945942:13946102:+	ENSMUSG00000068036	Mllt4	myeloid/lymphoid or mixed lineage-leukemia	n/a	n/a	n/a	n/a	n/a	n/a	n/a	0.26	0.72	0.98	0.45	0.8	1	0.09	0.64	0.98	0.04	0.45	0.97	0.07	0.41	0.89	0.03	0.45	0.88	0.3	0.65	0.94	0	0.41	0.91	0.18	0.58	0.89	0.5	0.82	0.98	0.24	0.66	0.95	0.36	0.77	0.98	0.04	0.51	0.88
chr12:70442260:70442468:-@chr12:70442043|70442063:70441982:-	ENSMUSG00000020982	Sdccag1	RIKEN full-length enriched library,Serologically defined colon cancer antigen 1., full insert sequence., clone:4933405E14 product:similar to SEROLOGICALLY DEFINED COLON CANCER ANTIGEN 1 [Homo sapiens],Mus musculus adult male testis cDNA,serologically defined colon cancer antigen 1	-1	0.0505051	0.925222	0.78	0.75	-0.03	-1.13541	0.53	0.71	0.87	0.47	0.85	0.97	0.4	0.77	0.95	0.83	0.94	1	0.34	0.64	0.94	0.72	0.88	0.97	0.64	0.84	0.97	0.65	0.86	0.98	0.33	0.65	0.96	0.32	0.62	0.92	0.52	0.69	0.84	0.8	0.94	1	0.67	0.84	0.95
chr11:5680209:5680656|5680638:+@chr11:5682188:5682360:+	n/a	n/a	n/a	n/a	n/a	n/a	n/a	n/a	n/a	n/a	0.01	0.12	0.47	0.02	0.19	0.64	0.01	0.19	0.59	0.03	0.21	0.58	0.03	0.24	0.75	0.01	0.23	0.82	0.01	0.14	0.54	0.01	0.2	0.77	0.03	0.19	0.48	0.01	0.18	0.61	0.03	0.24	0.68	0.03	0.19	0.54	0.02	0.36	0.8
chr10:116374453:116374749:-@chr10:116365245:116365340:-@chr10:116356630:116356707:-	ENSMUSG00000064181	Rab3ip	RAB3A interacting protein	2	0.40404	5.26647	0.93	0.94	0.01	0.303041	0.87	0.93	0.98	0.86	0.93	0.98	0.86	0.94	0.99	0.68	0.8	0.91	0.82	0.92	0.98	0.78	0.91	0.98	0.89	0.94	0.97	0.97	0.99	1	0.95	0.98	1	0.94	0.98	0.99	0.81	0.91	0.97	0.89	0.97	1	0.91	0.97	1
chr17:32524518:32524762:-@chr17:32518029:32518101:-@chr17:32503369:32505092:-	ENSMUSG00000024050	Wiz,wiz	Adult male pituitary gland cDNA, complete cds., RIKEN full-length enriched library,Mus musculus mRNA for wizL, clone:5330404D18 product:widely-interspaced zinc finger motifs, full insert sequence.	5	0.030303	3.06645	0.54	0.6	0.06	1.62067	0.25	0.67	0.95	0.07	0.42	0.74	0.06	0.53	0.93	0.04	0.36	0.83	0.05	0.45	0.89	0.01	0.17	0.49	0.06	0.33	0.67	0.47	0.75	0.95	0.24	0.64	0.94	0.15	0.55	0.85	0.34	0.74	0.96	0.02	0.4	0.88	0.06	0.47	0.94
chr11:51545305:51545407:-@chr11:51543077|51543080:51542954:-	ENSMUSG00000036391	Sec24a	RIKEN full-length enriched library, clone:A230067E15 product:weakly similar to PROTEIN TRANSPORT PROTEIN SEC24A (SEC24-RELATED PROTEIN A)., member A,Adult male hypothalamus cDNA, full insert sequence.,Mus musculus 10 days neonate skin cDNA,SEC24 related gene family, clone:4732496L22 product:PROTEIN TRANSPORT PROTEIN SEC24A (SEC24-RELATED PROTEIN A) (FRAGMENT) homolog [Homo sapiens]	n/a	n/a	n/a	n/a	n/a	n/a	n/a	0.2	0.5	0.87	n/a	n/a	n/a	n/a	n/a	n/a	n/a	n/a	n/a	n/a	n/a	n/a	0.08	0.46	0.92	0.2	0.67	0.97	0.05	0.4	0.85	0.11	0.58	0.99	0.27	0.71	0.97	0.13	0.52	0.86	0.36	0.72	0.96	0.45	0.78	0.98
chr11:6167421:6167582:-@chr11:6166970|6166974:6166814:-	ENSMUSG00000004393	Ddx56	full insert sequence.,Mus musculus 10 days embryo whole body cDNA,nucleolar RNA helicase homolog, clone:2600001H07 product:PROBABLE ATP-DEPENDENT 61 KDA NUCLEOLAR RNA HELICASE, RIKEN full-length enriched library	3	-0.030303	2.54437	0.61	0.72	0.11	1.19098	0.13	0.51	0.92	0.44	0.78	0.98	0.11	0.53	0.96	0	0.37	0.84	0.44	0.76	0.98	0.04	0.35	0.75	0.37	0.8	0.98	0.16	0.71	0.96	0.18	0.6	0.96	0.04	0.49	0.96	0.32	0.74	0.96	0.76	0.91	0.99	0.58	0.83	0.98
[truncated: 12,506 more rows]
[truncated: 211 more columns]

## Sheet: CELF1 muscle
CELF1 induction in muscle
[truncated: 13,239 more rows]
[truncated: 168 more columns]

## Sheet: CELF2 heart
CELF2 induction in heart
[truncated: 13,727 more rows]
[truncated: 111 more columns]
