# Supplementary material for: Antagonistic regulation of mRNA expression and splicing by CELF and MBNL proteins
Source: Genome Res. 2015 Jun;25(6):858–71. doi: 10.1101/gr.184390.114 (PMC4448682; doi:10.1101/gr.184390.114)
Supplement: Supplemental Material [file supp_gr.184390.114_Table_S3.xlsx]

## Sheet: TableS3.txt
Table S3. Splicing events regulated by both CELF1 and Mbnl1, along with information about regulation during heart development.
#Event	Gene	Symbol	Description	Celf1heart_ctl_psi	Celf1heart_7d_psi	Celf1heart_Z	Celf1muscle_ctl_psi	Celf1muscle_7d_psi	Celf1muscle_Z	Mbnl1heart_WT_psi	Mbnl1heart_KO_psi	Mbnl1heart_BF	Mbnl1muscle_WT_psi	Mbnl1muscle_KO_psi	Mbnl1muscle_BF	Heartdev_E18_psi	Heartdev_Adult_psi	Heartdev_Z
chr2:74367688:74367858:-@chr2:74366149:74366231:-@chr2:74352893:74360354:-	ENSMUSG00000009207	Lnp	limb and neural patterns [Source:MGI Symbol;Acc:MGI:1918115]	0.46	0.54	1.36535	0.92	0.71	-2.51588	0.28	0.4	0.87	0.91	0.51	23.77	n/a	n/a	0
chr11:117600672:117601323:+@chr11:117602959|117602983:117603132:+	ENSMUSG00000025571	Tnrc6c	trinucleotide repeat containing 6C [Source:MGI Symbol;Acc:MGI:2443265]	0.19	0.45	1.59094	n/a	n/a	0	0.06	0.33	11.6	n/a	n/a	0	0.06	0.01	-1.03078
chr4:34509561:34509704:+@chr4:34512377:34512526:+	ENSMUSG00000028291	Akirin2	akirin 2 [Source:MGI Symbol;Acc:MGI:1889364]	0.01	0.01	-1.6433	0.01	0.02	1.59603	0.15	0.07	2403.22	0.09	0.15	0.29	0.14	0.08	-1.40992
chr19:40447966:40448107:-@chr19:40444180:40444209:-@chr19:40439484:40439656:-	ENSMUSG00000025006	Sorbs1	sorbin and SH3 domain containing 1 [Source:MGI Symbol;Acc:MGI:700014]	0.51	0.71	2.39355	0.57	0.7	-0.520396	0.49	0.25	5543.98	0.76	0.4	3.07	0.57	0.5	-1.56925
chr10:75866503:75866619:-@chr10:75866369:75866389:-@chr10:75864077:75864280:-	ENSMUSG00000001151	Pcnt	pericentrin (kendrin) [Source:MGI Symbol;Acc:MGI:102722]	0.93	0.43	-2.1408	0.79	0.78	-1.56232	0.81	0.77	0.78	0.29	0.8	96984.6	n/a	n/a	0
chr4:11893449:11893601:-@chr4:11892761:11892795:-@chr4:11885330:11889380:-	ENSMUSG00000049225	Pdp1	pyruvate dehyrogenase phosphatase catalytic subunit 1 [Source:MGI Symbol;Acc:MGI:2685870]	n/a	n/a	0	0.14	0.22	1.57548	0.16	0.75	1000000000000	0.15	0.55	4.63981e+07	0.41	0.13	-1.68179
chr13:107764575:107764642:-@chr13:107759784:107759897:-@chr13:107758718:107758868:-	ENSMUSG00000021693	Kif2a	kinesin family member 2A [Source:MGI Symbol;Acc:MGI:108390]	0.4	0.06	-2.81902	0.57	0.4	-1.40223	0.13	0.27	0.74	0.79	0.47	15.92	0.05	0.28	2.15668
chr7:29551754:29551886:+@chr7:29552651:29552697:+@chr7:29556830:29556878:+	ENSMUSG00000015149	Sirt2	sirtuin 2 (silent mating type information regulation 2, homolog) 2 (S. cerevisiae) [Source:MGI Symbol;Acc:MGI:1927664]	0.14	0.43	2.70668	n/a	n/a	0	0.09	0.33	5453.05	0.68	0.84	1.09	0.64	0.29	-1.21814
chr9:108698325:108698727:+@chr9:108698986:108699114:+@chr9:108699538:108701165:+	ENSMUSG00000032599	Ip6k2	inositol hexaphosphate kinase 2 [Source:MGI Symbol;Acc:MGI:1923750]	0.68	0.79	1.75631	0.84	0.56	-1.31489	0.51	0.22	5.32	0.68	0.77	0.71	n/a	n/a	0
chr5:73349388:73349525:+@chr5:73357043:73357120:+@chr5:73365770:73366085:+	ENSMUSG00000036087	Slain2	SLAIN motif family, member 2 [Source:MGI Symbol;Acc:MGI:1923241]	n/a	n/a	0	0.94	0.57	-3.58416	0.39	0.2	73.48	0.72	0.48	38.32	0.14	0.64	2.37226
chr16:98183579:98183787:-@chr16:98177923:98178065:-@chr16:98168359:98174258:-	ENSMUSG00000046962	Zbtb21	zinc finger and BTB domain containing 21 [Source:MGI Symbol;Acc:MGI:1927240]	0.68	0.46	-1.88894	0.55	0.69	1.63245	0.48	0.65	0.82	0.22	0.76	6.12	n/a	n/a	0
chr12:4646461:4646600:+@chr12:4647719:4647799:+@chr12:4656789:4656925:+	ENSMUSG00000020640	Itsn2	intersectin 2 [Source:MGI Symbol;Acc:MGI:1338049]	0.7	0.26	-1.89172	n/a	n/a	0	0.29	0.86	23973.4	0.65	0.9	1.3	0.49	0.49	-0.233109
chr6:29306471:29306697:+@chr6:29311294:29311487:+@chr6:29311560:29311753:+@chr6:29316040:29316206:+	ENSMUSG00000029767	Calu	calumenin [Source:MGI Symbol;Acc:MGI:1097158]	0.55	0.43	-1.29891	0.27	0.48	3.00135	0.47	0.7	1000000000000	0.21	0.38	2462.77	0.69	0.45	-2.17405
chr14:70634947:70635015:-@chr14:70625735:70625761:-@chr14:70624774:70624855:-	ENSMUSG00000022092	Ppp3cc	protein phosphatase 3, catalytic subunit, gamma isoform [Source:MGI Symbol;Acc:MGI:107162]	n/a	n/a	0	0.71	0.48	-1.89481	0.15	0.03	0.92	0.74	0.21	1.98203e+06	0.03	0.07	1.07339
chr16:23112424:23112530:+@chr16:23113240:23114205:+	ENSMUSG00000022884	Eif4a2	eukaryotic translation initiation factor 4A2 [Source:MGI Symbol;Acc:MGI:106906]	0.23	0.52	1.77816	0.14	0.21	2.27317	0.73	0.65	0.62	0.33	0.5	1.1257e+07	0.46	0.15	-1.9938
chr5:124951849:124951941:-@chr5:124946192:124946279:-@chr5:124945908:124945931:-@chr5:124943089:124943853:-	ENSMUSG00000029392	Rilpl1	Rab interacting lysosomal protein-like 1 [Source:MGI Symbol;Acc:MGI:1922945]	0.88	0.63	-1.75235	0.31	0.41	0.654111	0.92	0.47	1000000000000	0.23	0.44	1000000000000	0.22	0.85	1.87501
chr1:183853691:183853971:-@chr1:183851899|183852631:183851789:-	ENSMUSG00000022995	Enah	enabled homolog (Drosophila) [Source:MGI Symbol;Acc:MGI:108360]	0.37	0.32	-1.45139	n/a	n/a	0	0.69	0.92	1000000000000	0.51	0.81	5.53285e+07	0.75	0.48	-2.04225
chr3:94937480:94937550:-@chr3:94937122:94937210:-	ENSMUSG00000092607	Scnm1	sodium channel modifier 1 [Source:MGI Symbol;Acc:MGI:1341284]	0.04	0.09	2.10303	0.07	0.12	2.31066	0.19	0.19	0.15	0.1	0.34	31.32	0.41	0.23	-1.55994
chr14:103571784:103571906:-@chr14:103569074:103569229:-@chr14:103554341:103555984:-	ENSMUSG00000033004	Mycbp2	MYC binding protein 2 [Source:MGI Symbol;Acc:MGI:2179432]	0.36	0.26	-1.40953	0.22	0.22	1.28787	0.24	0.69	17.41	0.35	0.25	0.54	n/a	n/a	0
chr1:93284922:93285041:-@chr1:93283792:93283918:-	ENSMUSG00000026309	Ilkap	integrin-linked kinase-associated serine/threonine phosphatase 2C [Source:MGI Symbol;Acc:MGI:1914694]	0.08	0.13	1.74981	0.04	0.08	2.18658	0.31	0.16	11.12	0.1	0.15	0.2	0.28	0.16	-1.39542
chr1:137738478:137738488:+@chr1:137740362:137740391:+@chr1:137742132:137742221:+	ENSMUSG00000026414	Tnnt2	troponin T2, cardiac [Source:MGI Symbol;Acc:MGI:104597]	0	0.03	3.37963	n/a	n/a	0	0.01	0.55	1000000000000	n/a	n/a	0	0.89	0.02	-2.48306
chr15:80064448:80064611:+@chr15:80065112:80065210:+@chr15:80066235:80068739:+	ENSMUSG00000022412	Smcr7l	Smith-Magenis syndrome chromosome region, candidate 7-like (human) [Source:MGI Symbol;Acc:MGI:2146020]	0.66	0.76	1.42078	0.34	0.72	1.6254	0.44	0.16	5.03	0.25	0.18	0.3	n/a	n/a	0
chr1:66981092:66981272:-@chr1:66980820:66980847:-@chr1:66976760:66976903:-	ENSMUSG00000061816	Myl1	myosin, light polypeptide 1 [Source:MGI Symbol;Acc:MGI:97269]	0.1	0.25	1.14892	0.46	0.35	-2.04828	0.41	0.88	3.57	0.43	0.48	2685.33	n/a	n/a	0
chr3:113272446:113272302|113272300:-@chr3:113267787:113267984:-	ENSMUSG00000074264	Amy1	amylase 1, salivary [Source:MGI Symbol;Acc:MGI:88019]	n/a	n/a	0	0.86	0.75	-1.73525	0.56	0.31	1.53	0.25	0.73	49.94	n/a	n/a	0
chr6:124759245:124759987|124759929:+@chr6:124760287:124761332:+	ENSMUSG00000038451	Spsb2	splA/ryanodine receptor domain and SOCS box containing 2 [Source:MGI Symbol;Acc:MGI:1315199]	0.04	0.13	2.38627	0.02	0.13	2.3459	0.07	0.06	0.07	0.01	0.03	12.16	n/a	n/a	0
chr13:54666543:54666796:-@chr13:54665876:54665982:-@chr13:54665546:54665633:-	ENSMUSG00000025871	4833439L19Rik	RIKEN cDNA 4833439L19 gene [Source:MGI Symbol;Acc:MGI:1921162]	0.79	0.91	1.13429	0.45	0.31	-2.75883	0.54	0.83	698.62	0.39	0.97	1000000000000	0.96	0.62	-2.42457
chr2:129627140:129627740:+@chr2:129636224:129636973:+@chr2:129653510:129658023:+	ENSMUSG00000037885	Stk35	serine/threonine kinase 35 [Source:MGI Symbol;Acc:MGI:1914583]	0.87	0.74	-0.614278	0.73	0.74	-1.73734	0.75	0.65	0.37	0.92	0.54	23.54	n/a	n/a	0
chr4:124428556:124428936:+@chr4:124454585:124454681:+@chr4:124457619:124457782:+	ENSMUSG00000028894	Inpp5b	inositol polyphosphate-5-phosphatase B [Source:MGI Symbol;Acc:MGI:103257]	0.65	0.59	-1.62327	0.75	0.77	1.52255	0.88	0.59	11.32	0.63	0.69	0.48	n/a	n/a	0
chr1:120406783:120406953:+@chr1:120408752:120408799:+@chr1:120418404:120418511:+	ENSMUSG00000064302	Clasp1	CLIP associating protein 1 [Source:MGI Symbol;Acc:MGI:1923957]	0.06	0.08	0.567352	0.78	0.29	-2.75901	0.05	0.04	0.09	0.57	0.08	4157.78	0.02	0.07	1.79049
chr17:80603572:80603471|80603462:-@chr17:80600652:80602084:-	ENSMUSG00000024097	Srsf7	serine/arginine-rich splicing factor 7 [Source:MGI Symbol;Acc:MGI:1926232]	0.79	0.49	-1.98409	0.65	0.64	-0.929854	0.86	0.62	11.34	0.61	0.61	0.44	0.58	0.58	0.0414513
chr15:75878545:75878582:-@chr15:75878352:75878426:-@chr15:75877594:75878102:-	ENSMUSG00000022568	Scrib	scribbled homolog (Drosophila) [Source:MGI Symbol;Acc:MGI:2145950]	0.31	0.27	-0.784148	0.42	0.18	-1.90329	0.13	0.04	0.48	0.11	0.41	474.34	n/a	n/a	0
chr15:99223310:99223471:+@chr15:99228315:99228426:+@chr15:99230492:99230638:+@chr15:99232011:99232094:+	ENSMUSG00000023010	Tmbim6	transmembrane BAX inhibitor motif containing 6 [Source:MGI Symbol;Acc:MGI:99682]	0.74	0.94	1.55643	0.62	0.6	-1.33723	0.03	0.36	22.98	0.63	0.4	1.01	0.1	0.19	1.37174
chr2:6468088:6468259:-@chr2:6460740:6466721:-	ENSMUSG00000002107	Celf2	CUGBP, Elav-like family member 2 [Source:MGI Symbol;Acc:MGI:1338822]	0.1	0.17	0.707664	0.07	0.36	3.95643	0.17	0.16	0.08	0.07	0.13	12.21	n/a	n/a	0
chr11:61181175:61181219:-@chr11:61180031:61180396:-@chr11:61176896:61176993:-	ENSMUSG00000010122	Slc47a1	solute carrier family 47, member 1 [Source:MGI Symbol;Acc:MGI:1914723]	0.71	0.74	0.536865	0.49	0.6	1.70114	0.92	0.81	1.91	0.57	0.86	6282.88	n/a	n/a	0
chr18:3295038:3295180:-@chr18:3276692:3276727:-@chr18:3273420:3273576:-	ENSMUSG00000063889	Crem	cAMP responsive element modulator [Source:MGI Symbol;Acc:MGI:88495]	n/a	n/a	0	0.43	0.58	1.42979	0.49	0.62	0.54	0.81	0.34	24.54	n/a	n/a	0
chr17:13109195:13109495:+@chr17:13110664:13110749:+@chr17:13110909:13113323:+	ENSMUSG00000068039	Tcp1	t-complex protein 1 [Source:MGI Symbol;Acc:MGI:98535]	0.99	0.98	-0.930471	0.99	0.94	-3.10573	0.99	0.99	0	0.96	0.99	404.59	0.94	0.98	1.7384
chr13:55610141:55610404:-@chr13:55609569:55609687:-@chr13:55609225:55609241:-	ENSMUSG00000021493	Pdlim7	PDZ and LIM domain 7 [Source:MGI Symbol;Acc:MGI:1914649]	0.48	0.49	-0.0249439	0.13	0.36	3.12398	0.5	0.67	1.71	0.32	0.92	1000000000000	0.75	0.63	-0.947613
chr9:21282725:21282792:+@chr9:21283343:21283481:+@chr9:21284851:21284989:+@chr9:21285777:21285863:+	ENSMUSG00000033335	Dnm2	dynamin 2 [Source:MGI Symbol;Acc:MGI:109547]	n/a	n/a	0	0.89	0.68	-2.33396	0.65	0.27	1000000000000	0.9	0.63	287389	0.37	0.72	2.17061
chr11:3129872:3130104:+@chr11:3133991:3134062:+@chr11:3134465:3134648:+	ENSMUSG00000020454	Eif4enif1	eukaryotic translation initiation factor 4E nuclear import factor 1 [Source:MGI Symbol;Acc:MGI:1921453]	0.69	0.29	-2.77512	0.57	0.41	-2.17124	0.74	0.7	0.37	0.84	0.46	14.05	0.47	0.57	0.806226
chr7:146440669:146442364|146442059:+@chr7:146452371:146453874:+	ENSMUSG00000060260	Pwwp2b	PWWP domain containing 2B [Source:MGI Symbol;Acc:MGI:2142008]	0.68	0.46	-1.06597	0.75	0.44	-1.70488	0.56	0.54	0.32	0.85	0.28	380114	n/a	n/a	0
chr7:134000740:134001301:-@chr7:133997003:133997094:-@chr7:133995094:133996505:-	ENSMUSG00000030689	Ino80e	INO80 complex subunit E [Source:MGI Symbol;Acc:MGI:2141881]	0.16	0.11	-0.761744	0.37	0.23	-1.78617	0.13	0.12	0.15	0.34	0.1	5.42	0.08	0.01	-1.35488
chr3:67868724:67868929:+@chr3:68298496:68299179:+@chr3:68400072:68400194:+	ENSMUSG00000027777	Schip1	schwannomin interacting protein 1 [Source:MGI Symbol;Acc:MGI:1353557]	0.27	0.75	3.38302	0.15	0.81	2.70584	0.76	0.77	0.12	0.42	0.85	1000000000000	n/a	n/a	0
chr7:138051850:138051939:+@chr7:138053102:138053142:+@chr7:138054346:138057009:+	ENSMUSG00000040268	Plekha1	pleckstrin homology domain containing, family A (phosphoinositide binding specific) member 1 [Source:MGI Symbol;Acc:MGI:2442213]	0.83	0.49	-1.45048	n/a	n/a	0	0.87	0.55	31.71	0.9	0.87	0.31	0.24	0.4	1.4788
chr18:32584474:32584621:+@chr18:32591325:32591396:+@chr18:32591637:32591747:+	ENSMUSG00000024381	Bin1	bridging integrator 1 [Source:MGI Symbol;Acc:MGI:108092]	0.41	0.29	-1.82114	0.41	0.95	4.02443	0.35	0.43	0.49	0.23	0.51	1000000000000	0.61	0.62	-0.894427
chr15:93226018:93226046:-@chr15:93224138:93224195:-@chr15:93221885:93221996:-	ENSMUSG00000022635	Zcrb1	zinc finger CCHC-type and RNA binding motif 1 [Source:MGI Symbol;Acc:MGI:1914447]	0.37	0.13	-2.21539	0.17	0.14	-1.45903	0.36	0.22	0.78	0.44	0.24	7.81	0.08	0.24	1.81362
chr1:82731991:82732082:+@chr1:82738393:82738551:+@chr1:82743658:82743717:+	ENSMUSG00000026150	Mff	mitochondrial fission factor [Source:MGI Symbol;Acc:MGI:1922984]	0.68	0.78	1.67794	0.85	0.64	-2.42666	0.79	0.6	165.63	0.93	0.88	0.38	0.72	0.84	1.71102
chrX:99754904:99755073:-@chrX:99752435:99752611:-@chrX:99750865:99750956:-	ENSMUSG00000034055	Phka1	phosphorylase kinase alpha 1 [Source:MGI Symbol;Acc:MGI:97576]	0.26	0.57	2.83736	0.7	0.79	1.73734	0.21	0.18	0.21	0.77	0.16	1000000000000	0.45	0.17	-1.70907
chr17:25377114:25377309:+@chr17:25377389:25377608:+@chr17:25378009:25378202:+	ENSMUSG00000015126	Tsr3	TSR3 20S rRNA accumulation [Source:MGI Symbol;Acc:MGI:1915577]	0.81	0.58	-0.634248	0.63	0.93	1.66822	0.94	0.9	0.29	0.71	0.96	39.87	0.98	0.62	-1.27149
chr18:80243628:80243881:+@chr18:80276564:80276786:+@chr18:80313708:80316381:+	ENSMUSG00000056214	Pard6g	par-6 partitioning defective 6 homolog gamma (C. elegans) [Source:MGI Symbol;Acc:MGI:2135606]	0.88	0.62	-1.65187	n/a	n/a	0	0.81	0.54	5.16	0.33	0.56	0.68	0.96	0.48	-1.29249
chr5:115996822:115996957:+@chr5:116001497:116001598:+@chr5:116001860:116002030:+	ENSMUSG00000029528	Pxn	paxillin [Source:MGI Symbol;Acc:MGI:108295]	n/a	n/a	0	0.71	0.61	-1.74044	0.48	0.27	2.58	0.76	0.49	10.13	0.55	0.45	-1.25326
chr6:129183082:129183171:-@chr6:129166320:129166554:-@chr6:129158430:129160221:-	n/a	n/a	n/a	n/a	n/a	0	0.44	0.77	1.4049	0.79	0.72	0.29	0.35	0.88	1000000000000	n/a	n/a	0
chr7:130323231:130323373:+@chr7:130323763:130323909:+@chr7:130324054:130324191:+	ENSMUSG00000052707	Tnrc6a	trinucleotide repeat containing 6a [Source:MGI Symbol;Acc:MGI:2385292]	0.6	0.42	-0.299369	0.49	0.1	-2.90039	0.54	0.73	0.92	0.27	0.71	10.67	0.79	0.66	-1.07972
chr14:21113911:21114014:+@chr14:21114310:21114431:+@chr14:21119809:21119901:+	ENSMUSG00000021809	Nudt13	nudix (nucleoside diphosphate linked moiety X)-type motif 13 [Source:MGI Symbol;Acc:MGI:1914975]	0.51	0.46	0.336082	0.59	0.66	1.44197	0.4	0.49	0.4	0.64	0.87	9.94	n/a	n/a	0
chr3:88972568:88972845:+@chr3:88973537|88973540:88973624:+	ENSMUSG00000068917	Clk2	CDC-like kinase 2 [Source:MGI Symbol;Acc:MGI:1098669]	0.46	0.64	1.95135	0.65	0.58	-1.13057	0.83	0.44	15.03	0.54	0.5	0.43	n/a	n/a	0
chr1:175801509:175801676:-@chr1:175795530:175795688:-@chr1:175792592:175793014:-	ENSMUSG00000090272	Mndal	myeloid nuclear differentiation antigen like [Source:MGI Symbol;Acc:MGI:3780953]	n/a	n/a	0	0.49	0.96	1.93043	0.79	0.73	0.75	0.85	0.41	28.37	n/a	n/a	0
chr3:95264299:95264343:+@chr3:95270715:95270759:+@chr3:95274099:95274312:+	ENSMUSG00000015522	Arnt	aryl hydrocarbon receptor nuclear translocator [Source:MGI Symbol;Acc:MGI:88071]	0.75	0.5	-2.46628	0.63	0.68	1.22272	0.54	0.84	50416.2	0.86	0.9	0.17	n/a	n/a	0
chr2:29575113:29575370:+@chr2:29576163:29576258:+@chr2:29577744:29577829:+	ENSMUSG00000039844	Rapgef1	Rap guanine nucleotide exchange factor (GEF) 1 [Source:MGI Symbol;Acc:MGI:104580]	0.17	0.19	0.719501	0.61	0.55	-2.07863	0.13	0.04	0.63	0.46	0.07	1000000000000	n/a	n/a	0
chr11:120829309:120829448:-@chr11:120826262:120826324:-@chr11:120823055:120825220:-	ENSMUSG00000025162	Csnk1d	casein kinase 1, delta [Source:MGI Symbol;Acc:MGI:1355272]	0.25	0.55	2.40102	0.6	0.72	1.49887	0.31	0.27	0.21	0.63	0.18	1000000000000	0.3	0.34	1.08476
chr19:57123952:57123999:-@chr19:57121415:57121561:-@chr19:57119371:57119462:-	ENSMUSG00000025085	Ablim1	actin-binding LIM protein 1 [Source:MGI Symbol;Acc:MGI:1194500]	0.25	0.28	2.10038	0.58	0.65	-1.13681	0.41	0.24	22.34	0.72	0.4	2.52	0.72	0.68	-1.1767
chr10:17823943:17824081:+@chr10:17827474:17827554:+@chr10:17834205:17834292:+	ENSMUSG00000019854	Reps1	RalBP1 associated Eps domain containing protein [Source:MGI Symbol;Acc:MGI:1196373]	0.11	0.24	0.858388	0.2	0.32	1.70796	0.23	0.14	0.35	0.23	0.47	13.2	n/a	n/a	0
chr11:60055320:60055395:-@chr11:60046400:60046459:-@chr11:60044603:60044639:-	ENSMUSG00000000538	Tom1l2	target of myb1-like 2 (chicken) [Source:MGI Symbol;Acc:MGI:2443306]	0.94	0.83	-1.3604	0.71	0.61	-1.82791	0.93	0.95	0.19	0.66	0.98	903061	0.99	0.96	-0.950708
chr19:57123952:57123999:-@chr19:57121415:57121555:-@chr19:57119371:57119462:-	ENSMUSG00000025085	Ablim1	actin-binding LIM protein 1 [Source:MGI Symbol;Acc:MGI:1194500]	0.25	0.26	2.04243	0.6	0.65	-0.108461	0.42	0.23	7.5	0.77	0.54	1.09	0.79	0.64	-1.74705
chr3:60417185:60417442:+@chr3:60418605:60418658:+@chr3:60419542:60423841:+	ENSMUSG00000027763	Mbnl1	muscleblind-like 1 (Drosophila) [Source:MGI Symbol;Acc:MGI:1928482]	0.14	0.09	-1.49532	n/a	n/a	0	0.07	0.31	5.57	0.21	0.55	176215	0.27	0.05	-2.26942
chr14:48345901:48345984:+@chr14:48346146:48346229:+@chr14:48350015:48350098:+	ENSMUSG00000021843	Ktn1	kinectin 1 [Source:MGI Symbol;Acc:MGI:109153]	0.2	0.18	-0.580255	0.13	0.26	3.48626	0.38	0.17	1000000000000	0.2	0.1	7.08	0.41	0.6	1.76478
chr15:76541044:76541513:+@chr15:76541852:76541960:+@chr15:76543297:76544415:+	ENSMUSG00000033728	Lrrc14	leucine rich repeat containing 14 [Source:MGI Symbol;Acc:MGI:2445060]	0.49	0.68	2.10597	0.74	0.35	-1.89123	0.31	0.53	0.6	0.72	0.18	1000000000000	n/a	n/a	0
chr8:71346056:71346149:+@chr8:71348951:71349028:+@chr8:71351176:71353987:+	ENSMUSG00000031864	Ints10	integrator complex subunit 10 [Source:MGI Symbol;Acc:MGI:1918135]	0.56	0.33	-2.11495	n/a	n/a	0	0.5	0.1	7868.59	0.55	0.5	0.72	0.11	0.15	0.950708
chr9:119253244:119253370:+@chr9:119253584|119255588:119255686:+	ENSMUSG00000036138	Acaa1a	acetyl-Coenzyme A acyltransferase 1A [Source:MGI Symbol;Acc:MGI:2148491]	0.05	0.2	2.83911	0.14	0.15	1.86697	0.58	0.51	0.28	0.54	0.74	5.23	n/a	n/a	0
chr19:7060295:7060330:-@chr19:7059985|7060086:7059851:-	ENSMUSG00000024962	Vegfb	vascular endothelial growth factor B [Source:MGI Symbol;Acc:MGI:106199]	0.41	0.34	-1.8616	0.34	0.45	2.13659	0.55	0.65	1000000000000	0.55	0.61	0.29	n/a	n/a	0
chr17:35479545:35479814:+@chr17:35480058:35480333:+@chr17:35562516:35562579:+@chr17:35564809:35565093:+	ENSMUSG00000091705	H2-Q2	histocompatibility 2, Q region locus 2 [Source:MGI Symbol;Acc:MGI:95931]	0.07	0.01	-1.45501	0.06	0.14	0.826181	0.62	0.03	1000000000000	0.48	0.54	1.12	0.4	0.01	-1.46009
chr11:119970746:119970850:-@chr11:119969781:119969804:-@chr11:119967748:119967924:-	ENSMUSG00000061306	Slc38a10	solute carrier family 38, member 10 [Source:MGI Symbol;Acc:MGI:1919305]	0.54	0.15	-3.0196	0.6	0.31	-2.35125	0.19	0.43	2.37	0.71	0.31	8.72	0.27	0.52	1.63544
chr14:32306783:32307150:-@chr14:32305508:32305642:-@chr14:32300757:32300927:-	ENSMUSG00000021891	Mettl6	methyltransferase like 6 [Source:MGI Symbol;Acc:MGI:1914261]	0.73	0.58	-1.88096	0.86	0.81	-0.845007	0.76	0.97	12.51	0.49	0.81	1.69	0.96	0.75	-1.06424
chr13:83732039:83732242:+@chr13:83764760:83764903:+@chr13:83764965:83765102:+@chr13:83772658:83773496:+	ENSMUSG00000005583	Mef2c	myocyte enhancer factor 2C [Source:MGI Symbol;Acc:MGI:99458]	0.87	0.83	0.839149	0.36	0.67	3.32175	0.9	0.96	1.03	0.44	0.64	3.06039e+08	0.9	0.73	-1.7616
chr14:52531141:52531221:-@chr14:52530761:52530802:-@chr14:52529990:52530460:-	ENSMUSG00000004558	Ndrg2	N-myc downstream regulated gene 2 [Source:MGI Symbol;Acc:MGI:1352498]	0.65	0.5	-1.97557	0.96	0.93	-2.31887	0.66	0.52	1000000000000	0.99	0.97	1.60618e+08	0.24	0.83	2.20501
chrX:154158356:154159011:+@chrX:154189527:154189561:+@chrX:154190104:154190523:+	ENSMUSG00000041476	Smpx	small muscle protein, X-linked [Source:MGI Symbol;Acc:MGI:1913356]	0.98	0.86	-3.19501	0.88	0.75	-2.27444	0.98	0.98	0.04	0.84	0.93	58.6	0.7	0.95	2.85769
chrX:150130628:150130934:-@chrX:150130167:150130221:-@chrX:150119695:150124240:-	ENSMUSG00000041633	Kctd12b	potassium channel tetramerisation domain containing 12b [Source:MGI Symbol;Acc:MGI:2444667]	0.65	0.48	-1.98515	n/a	n/a	0	0.8	0.19	8.57	0.46	0.62	0.64	0.34	0.5	1.36117
chr3:58219611:58221535:+@chr3:58232150:58232221:+@chr3:58263253:58263304:+	ENSMUSG00000027806	Tsc22d2	TSC22 domain family, member 2 [Source:MGI Symbol;Acc:MGI:1919283]	n/a	n/a	0	0.77	0.39	-3.30214	0.33	0.3	0.32	0.77	0.43	41.15	0.26	0.61	2.0595
chr4:151700865:151701694:+@chr4:151703369:151703518:+@chr4:151704113:151705081:+	ENSMUSG00000028936	Rpl22	ribosomal protein L22 [Source:MGI Symbol;Acc:MGI:99262]	0.09	0.01	-2.6183	0.14	0.06	-2.40387	0.1	0.27	2.79	0.34	0.76	45.14	n/a	n/a	0
chr7:82821992:82822365:+@chr7:82824706:82824759:+@chr7:82830003:82830195:+	ENSMUSG00000066406	Akap13	A kinase (PRKA) anchor protein 13 [Source:MGI Symbol;Acc:MGI:2676556]	0.5	0.37	-1.57648	0.56	0.38	-1.58852	0.77	0.76	0.38	0.02	0.73	1000000000000	n/a	n/a	0
chr12:60238685:60238773:+@chr12:60247323:60247349:+@chr12:60247834:60247944:+	ENSMUSG00000021000	Ctage5	CTAGE family, member 5 [Source:MGI Symbol;Acc:MGI:1346056]	0.48	0.29	-2.42524	0.59	0.34	-2.5169	0.72	0.41	7.47	0.74	0.62	0.52	0.16	0.75	2.23249
chr16:84978309:84978530:-@chr16:84971653:84971706:-@chr16:84965915:84966015:-	ENSMUSG00000022892	App	amyloid beta (A4) precursor protein [Source:MGI Symbol;Acc:MGI:88059]	n/a	n/a	0	0.6	0.48	-2.5923	0.41	0.57	6.89	0.59	0.83	7.13245e+08	0.87	0.47	-2.24277
chr4:131881861:131881960:-@chr4:131881123:131881175:-	ENSMUSG00000028898	Trnau1ap	tRNA selenocysteine 1 associated protein 1 [Source:MGI Symbol;Acc:MGI:1919037]	0.09	0.24	2.64751	n/a	n/a	0	0.52	0.3	6.6	n/a	n/a	0	0.46	0.34	-1.19285
chr1:63223160:63223397:-@chr1:63218728:63218831:-@chr1:63217423:63217488:-	ENSMUSG00000025968	Ndufs1	NADH dehydrogenase (ubiquinone) Fe-S protein 1 [Source:MGI Symbol;Acc:MGI:2443241]	0.13	0.17	0.332716	0.14	0.36	2.35378	0.15	0.22	3.61	0.06	0.2	3811.33	0.33	0.12	-2.27857
chr11:119970746:119970850:-@chr11:119969781:119969867:-@chr11:119967748:119967924:-	ENSMUSG00000061306	Slc38a10	solute carrier family 38, member 10 [Source:MGI Symbol;Acc:MGI:1919305]	0.22	0.12	-1.94825	0.28	0.1	-2.54608	0.27	0.52	544.03	0.51	0.51	0.31	0.43	0.63	1.77133
chr13:54666543:54666796:-@chr13:54665546:54665633:-@chr13:54662661:54663232:-	ENSMUSG00000025871	4833439L19Rik	RIKEN cDNA 4833439L19 gene [Source:MGI Symbol;Acc:MGI:1921162]	n/a	n/a	0	0.77	0.96	1.78992	0.54	0.87	80448.2	0.28	0.78	1000000000000	0.82	0.35	-2.15875
chr13:49478412:49478622:+@chr13:49480340:49482394:+	ENSMUSG00000037933	Bicd2	bicaudal D homolog 2 (Drosophila) [Source:MGI Symbol;Acc:MGI:1924145]	0.06	0.06	1.53871	0.04	0.12	2.73774	0.06	0.04	0.13	0.06	0.13	5.17	0.04	0.02	-1.74054
chr7:148042052:148043453:+@chr7:148043673|148043777:148043791:+	ENSMUSG00000025485	Ric8	resistance to inhibitors of cholinesterase 8 homolog (C. elegans) [Source:MGI Symbol;Acc:MGI:2141866]	0.78	0.5	-2.05367	0.54	0.68	1.40893	0.42	0.38	0.42	0.7	0.2	5.29	n/a	n/a	0
chr6:131329376:131329894:-@chr6:131325992:131326198:-@chr6:131320341:131320432:-	ENSMUSG00000030189	Ybx3	Y box protein 3 [Source:MGI Symbol;Acc:MGI:2137670]	0.24	0.39	2.70218	0.26	0.3	0.265592	0.28	0.46	1000000000000	0.27	0.42	1000000000000	0.21	0.16	-1.4852
chr3:157689689:157689822:-@chr3:157687087:157687195:-@chr3:157686207:157686323:-	ENSMUSG00000055436	Srsf11	serine/arginine-rich splicing factor 11 [Source:MGI Symbol;Acc:MGI:1916457]	0.32	0.87	2.46257	0.61	0.54	-1.23939	0.63	0.27	20	0.27	0.31	0.44	0.54	0.4	-1.31091
chr17:80251865:80252296:-@chr17:80250227:80250241:-	ENSMUSG00000059811	Atl2	atlastin GTPase 2 [Source:MGI Symbol;Acc:MGI:1929492]	0.03	0.08	2.67162	0.03	0.08	2.77197	0.16	0.05	207.05	0.05	0.09	2.86915e+06	0.48	0.32	-1.64871
chr5:34959212:34959556|34959463:+@chr5:34961999:34962100:+	ENSMUSG00000029106	Add1	adducin 1 (alpha) [Source:MGI Symbol;Acc:MGI:87918]	n/a	n/a	0	0.14	0.05	-1.67256	0.21	0.39	18.26	0.17	0.6	3.56211e+06	0.06	0.1	1.64349
chr11:120481477:120481583:-@chr11:120479686:120480363:-	ENSMUSG00000025138	Sirt7	sirtuin 7 (silent mating type information regulation 2, homolog) 7 (S. cerevisiae) [Source:MGI Symbol;Acc:MGI:2385849]	0.09	0.13	-0.37466	0.22	0.13	-1.82667	0.33	0.25	0.38	0.25	0.54	16549.7	0.24	0.15	-1.18845
chr6:124997497:124997605:+@chr6:124997814:124997958:+	ENSMUSG00000030330	Ing4	inhibitor of growth family, member 4 [Source:MGI Symbol;Acc:MGI:107307]	0.14	0.3	1.4037	0.25	0.15	-1.92498	0.38	0.28	0.36	0.15	0.42	102.04	n/a	n/a	0
chr10:70724832:70724863:-@chr10:70722490:70722567:-	ENSMUSG00000019927	Ube2d1	ubiquitin-conjugating enzyme E2D 1 [Source:MGI Symbol;Acc:MGI:2384911]	0.02	0.08	1.09992	0.02	0.03	1.78552	0.26	0.17	0.6	0.12	0.24	406.42	0.65	0.37	-1.67401
chr11:3025239:3026061:+@chr11:3028932:3029121:+@chr11:3029385:3029523:+	ENSMUSG00000082286	Pisd-ps1	phosphatidylserine decarboxylase, pseudogene 1 [Source:MGI Symbol;Acc:MGI:3842428]	0.96	0.85	-1.59103	0.63	0.92	1.45421	0.76	0.72	0.47	0.89	0.44	389869	n/a	n/a	0
chr18:34379991:34380930:+@chr18:34420659:34420811:+@chr18:34425712:34425876:+@chr18:34427952:34428033:+	ENSMUSG00000005871	Apc	adenomatosis polyposis coli [Source:MGI Symbol;Acc:MGI:88039]	0.76	0.74	-1.90415	0.8	0.69	-1.08117	0.92	0.16	7.23117e+10	0.33	0.47	0.74	0.87	0.97	1.49203
chr3:106350611:106350838:+@chr3:106353417:106353593:+@chr3:106355074:106355198:+	ENSMUSG00000027900	Dram2	DNA-damage regulated autophagy modulator 2 [Source:MGI Symbol;Acc:MGI:1914421]	0.04	0.11	2.10047	0.04	0.06	1.3988	0.01	0.08	17.37	0.08	0.05	0.12	0.26	0.11	-1.60385
chr11:93973347:93973460:+@chr11:93974577:93974615:+@chr11:93975487:93975663:+	ENSMUSG00000020859	Spag9	sperm associated antigen 9 [Source:MGI Symbol;Acc:MGI:1918084]	0.87	0.52	-1.58636	0.45	0.61	0.782565	0.94	0.67	2323.65	0.46	0.18	33.09	0.73	0.94	2.19879
chr2:25315687:25315877:-@chr2:25315529:25315594:-	ENSMUSG00000047617	BC029214	cDNA sequence BC029214 [Source:MGI Symbol;Acc:MGI:2442831]	0.17	0.17	0.35906	0.09	0.27	1.58523	0.39	0.4	0.32	0.42	0.12	7.34	n/a	n/a	0
chr18:36773544:36774471:+@chr18:36784163:36784921:+@chr18:36791721:36791866:+	ENSMUSG00000024483	Ankhd1	ankyrin repeat and KH domain containing 1 [Source:MGI Symbol;Acc:MGI:1921733]	0.8	0.91	2.07661	n/a	n/a	0	0.93	0.66	358.27	0.94	0.93	0.19	0.96	0.93	-0.296587
chr2:4559895:4560041:-@chr2:4558194:4558262:-	ENSMUSG00000039449	Prpf18	PRP18 pre-mRNA processing factor 18 homolog (yeast) [Source:MGI Symbol;Acc:MGI:1914479]	0.02	0.03	1.93299	0.01	0.01	-1.35949	0.29	0.11	14.79	0.21	0.22	0.15	0.19	0.06	-1.61386
chr5:124951849:124951941:-@chr5:124946192:124946279:-@chr5:124943089:124943853:-	ENSMUSG00000029392	Rilpl1	Rab interacting lysosomal protein-like 1 [Source:MGI Symbol;Acc:MGI:1922945]	0.66	0.49	-1.52151	0.24	0.27	0.315747	0.8	0.23	1000000000000	0.27	0.42	33.59	0.04	0.74	2.44977
chr3:60305100:60305345:+@chr3:60332678:60333726:+@chr3:60399516:60402024:+	ENSMUSG00000027763	Mbnl1	muscleblind-like 1 (Drosophila) [Source:MGI Symbol;Acc:MGI:1928482]	n/a	n/a	0	0.98	0.98	1.48831	0.99	0.22	1000000000000	0.99	0.29	1000000000000	n/a	n/a	0
chr7:30879813:30880230:+@chr7:30884547:30884741:+@chr7:30889249:30892847:+	ENSMUSG00000049421	Zfp260	zinc finger protein 260 [Source:MGI Symbol;Acc:MGI:1347071]	0.92	0.65	-1.83121	0.53	0.81	0.789227	0.96	0.58	222995576199	0.59	0.63	0.6	n/a	n/a	0
chr11:77279920:77280101:+@chr11:77280726:77280845:+@chr11:77281768:77281872:+	ENSMUSG00000020836	Coro6	coronin 6 [Source:MGI Symbol;Acc:MGI:2183448]	0.19	0.18	-0.0867625	0.09	0.21	2.01737	0.27	0.21	0.33	0.03	0.1	8.7	n/a	n/a	0
chr8:87250368:87250504:-@chr8:87247627:87247749:-@chr8:87245542:87245717:-	ENSMUSG00000001911	Nfix	nuclear factor I/X [Source:MGI Symbol;Acc:MGI:97311]	0.66	0.63	-0.173233	0.31	0.45	2.53142	0.54	0.84	1775943	0.28	0.9	1000000000000	n/a	n/a	0
chr3:106350611:106350838:+@chr3:106351824:106351903:+@chr3:106353417:106353593:+@chr3:106355074:106355198:+	ENSMUSG00000027900	Dram2	DNA-damage regulated autophagy modulator 2 [Source:MGI Symbol;Acc:MGI:1914421]	0.89	0.62	-2.48769	0.84	0.78	-1.24855	0.96	0.84	9.62	0.68	0.83	0.71	n/a	n/a	0
chr8:11628439:11628530:-@chr8:11623697:11623858:-@chr8:11619062:11619297:-	ENSMUSG00000031508	Ankrd10	ankyrin repeat domain 10 [Source:MGI Symbol;Acc:MGI:1921840]	0.35	0.3	-1.43918	0.23	0.17	-1.4921	0.3	0.64	1811.52	0.43	0.28	0.76	0.51	0.69	1.51688
chr11:59317312:59317179|59316886:-@chr11:59316422:59316602:-	ENSMUSG00000020472	Zkscan17	zinc finger with KRAB and SCAN domains 17 [Source:MGI Symbol;Acc:MGI:2679270]	0.85	0.61	-1.43745	n/a	n/a	0	0.87	1	10758.3	0.81	0.82	0.28	n/a	n/a	0
chr1:156984904:156984829|156984644:-@chr1:156983705:156983980:-	ENSMUSG00000026471	Mr1	major histocompatibility complex, class I-related [Source:MGI Symbol;Acc:MGI:1195463]	0.7	0.65	-0.632498	0.62	0.78	1.44206	0.82	0.61	1.26	0.68	0.38	10.89	0.43	0.67	1.26349
chr10:79167103:79167329:+@chr10:79171442:79171789:+@chr10:79172416:79172572:+	ENSMUSG00000023175	Bsg	basigin [Source:MGI Symbol;Acc:MGI:88208]	0.03	0.12	2.60826	0.04	0.43	4.93076	0.04	0.01	1000000000000	0.03	0.05	0.09	n/a	n/a	0
chr12:114154091:114154204:-@chr12:114153816:114153929:-@chr12:114153682:114153728:-	ENSMUSG00000002799	Jag2	jagged 2 [Source:MGI Symbol;Acc:MGI:1098270]	n/a	n/a	0	0.53	0.72	2.0056	0.79	0.93	1.4	0.39	0.88	6.76345e+09	n/a	n/a	0
chr4:134481208:134481347:+@chr4:134482650:134482733:+	ENSMUSG00000037266	D4Wsu53e	DNA segment, Chr 4, Wayne State University 53, expressed [Source:MGI Symbol;Acc:MGI:106498]	0.25	0.75	2.90724	0.86	0.58	-3.51911	0.78	0.8	0.1	0.91	0.94	14823.7	n/a	n/a	0
chr10:127924990:127925415|127925073:+@chr10:127925952:127927641:+	ENSMUSG00000025369	Smarcc2	SWI/SNF related, matrix associated, actin dependent regulator of chromatin, subfamily c, member 2 [Source:MGI Symbol;Acc:MGI:1915344]	0.13	0.32	3.29171	0.22	0.65	3.46742	0.23	0.08	351553238596	0.15	0.19	0.19	0.14	0.07	-1.30979
chr18:67832321:67832422:-@chr18:67825155:67825528:-	ENSMUSG00000024539	Ptpn2	protein tyrosine phosphatase, non-receptor type 2 [Source:MGI Symbol;Acc:MGI:97806]	0.37	0.12	-2.93451	0.17	0.16	0.412521	0.77	0.65	7.6	0.58	0.8	1000000000000	0.48	0.48	1.07339
chr8:13934528:13935289:+@chr8:13938922:13938948:+@chr8:13939563:13940542:+	ENSMUSG00000038365	Fbxo25	F-box protein 25 [Source:MGI Symbol;Acc:MGI:1914072]	0.76	0.26	-2.88084	n/a	n/a	0	0.44	0.82	10.86	0.82	0.8	0.54	0.45	0.77	1.25326
chr3:115590694:115591022:-@chr3:115589240:115589293:-@chr3:115584498:115584756:-	n/a	n/a	n/a	0.2	0.25	0.977873	0.36	0.18	-2.65119	0.05	0.09	0.18	0.21	0.04	10459.9	n/a	n/a	0
chr17:33675516:33675657|33675646:+@chr17:33680143:33680250:+	ENSMUSG00000024299	Adamts10	a disintegrin-like and metallopeptidase (reprolysin type) with thrombospondin type 1 motif, 10 [Source:MGI Symbol;Acc:MGI:2449112]	0.62	0.43	-2.14291	n/a	n/a	0	0.61	0.26	7.65	n/a	n/a	0	n/a	n/a	0
chr4:134902650:134902772:-@chr4:134900414:134900584:-	ENSMUSG00000028809	Srrm1	serine/arginine repetitive matrix 1 [Source:MGI Symbol;Acc:MGI:1858303]	0.18	0.13	-2.74026	0.23	0.13	-2.28394	0.7	0.65	0.24	0.65	0.42	82.72	n/a	n/a	0
chr9:22039464:22039590:+@chr9:22040472|22040646:22040738:+	ENSMUSG00000057982	Zfp809	zinc finger protein 809 [Source:MGI Symbol;Acc:MGI:2143362]	0.32	0.56	2.00462	n/a	n/a	0	0.42	0.74	72.52	n/a	n/a	0	0.35	0.54	1.17954
chr15:75880480:75880542:-@chr15:75879887:75879970:-@chr15:75879578:75879731:-	ENSMUSG00000022568	Scrib	scribbled homolog (Drosophila) [Source:MGI Symbol;Acc:MGI:2145950]	0.53	0.35	-1.86941	0.69	0.42	-2.51932	0.62	0.64	0.33	0.69	0.9	7.63	n/a	n/a	0
chr2:91490017:91490409:+@chr2:91491906:91491980:+@chr2:91494230:91494364:+	ENSMUSG00000027247	Arhgap1	Rho GTPase activating protein 1 [Source:MGI Symbol;Acc:MGI:2445003]	0.76	0.81	2.14762	n/a	n/a	0	0.96	0.69	13.46	n/a	n/a	0	0.9	0.78	-1.21899
chr17:45726630:45726769:-@chr17:45726363:45726497:-	ENSMUSG00000023942	Slc29a1	solute carrier family 29 (nucleoside transporters), member 1 [Source:MGI Symbol;Acc:MGI:1927073]	0.21	0.07	-2.7486	0.14	0.16	1.33957	0.35	0.18	25.85	0.33	0.2	0.84	n/a	n/a	0
chr19:3768022:3768340:+@chr19:3782220:3782279:+@chr19:3786389:3786741:+	ENSMUSG00000045098	Suv420h1	suppressor of variegation 4-20 homolog 1 (Drosophila) [Source:MGI Symbol;Acc:MGI:2444557]	0.38	0.21	-2.19523	0.39	0.43	2.35505	0.12	0.76	1000000000000	0.45	0.38	0.66	n/a	n/a	0
chr2:70608061:70608132:-@chr2:70606919:70606987:-@chr2:70595179:70595606:-	ENSMUSG00000041997	Tlk1	tousled-like kinase 1 [Source:MGI Symbol;Acc:MGI:2441683]	0.19	0.2	-1.23436	0.25	0.4	2.0212	0.34	0.4	0.63	0.16	0.71	7.04868e+09	n/a	n/a	0
chr12:113063228:113063319:+@chr12:113063790:113063843:+@chr12:113065754:113066604:+	ENSMUSG00000021286	Zfyve21	zinc finger, FYVE domain containing 21 [Source:MGI Symbol;Acc:MGI:1915770]	0.5	0.23	-1.22018	0.59	0.26	-2.39074	0.81	0.63	2.43	0.65	0.35	8.34	0.68	0.9	1.49911
chr11:77286783:77286913:-@chr11:77286513:77286670:-	ENSMUSG00000037907	Ankrd13b	ankyrin repeat domain 13b [Source:MGI Symbol;Acc:MGI:2144501]	0.26	0.19	-0.639387	0.24	0.15	-1.43127	0.22	0.43	1.01	0.02	0.36	9.12	n/a	n/a	0
chr7:19677288:19677603:+@chr7:19677767|19677892:19677981:+	ENSMUSG00000030409	Dmpk	dystrophia myotonica-protein kinase [Source:MGI Symbol;Acc:MGI:94906]	0.23	0.19	-0.697178	0.16	0.23	2.18199	0.32	0.29	0.12	0.18	0.35	9.82	0.76	0.61	-0.931625
chr11:116712170:116712275:-@chr11:116711368:116711667:-	ENSMUSG00000034120	Srsf2	serine/arginine-rich splicing factor 2 [Source:MGI Symbol;Acc:MGI:98284]	0.21	0.38	1.68903	0.58	0.54	-0.524368	0.51	0.67	1000000000000	0.69	0.71	0.1	0.89	0.94	1.41711
chr9:108397143:108397258:+@chr9:108397365|108397371:108397585:+	ENSMUSG00000006676	Usp19	ubiquitin specific peptidase 19 [Source:MGI Symbol;Acc:MGI:1918722]	0.54	0.91	2.27912	0.69	0.64	0.0263195	0.77	0.42	14.34	0.61	0.71	0.61	0.68	0.59	-1.14119
chr5:122907435:122907312|122905902:-@chr5:122903312:122904313:-	ENSMUSG00000029467	Atp2a2	ATPase, Ca++ transporting, cardiac muscle, slow twitch 2 [Source:MGI Symbol;Acc:MGI:88110]	0.04	0.1	3.2692	0.08	0.22	2.08534	0.07	0.04	1000000000000	0.42	0.45	0.16	0.26	0.1	-2.02801
chr2:35583578:35583648:+@chr2:35584631:35586514:+	ENSMUSG00000026883	Dab2ip	disabled 2 interacting protein [Source:MGI Symbol;Acc:MGI:1916851]	0.78	0.76	-0.981533	0.86	0.79	-1.67747	0.85	0.77	0.52	0.73	0.53	1000000000000	n/a	n/a	0
chr4:43064109:43064249:+@chr4:43065817:43065923:+@chr4:43066026:43066128:+	n/a	n/a	n/a	n/a	n/a	0	0.51	0.41	-1.45923	0.22	0.23	0.25	0.58	0.21	5.08	0.41	0.49	1.18983
chr11:59609252:59609365:-@chr11:59608766|59609077:59608643:-	ENSMUSG00000032633	Flcn	folliculin [Source:MGI Symbol;Acc:MGI:2442184]	0.23	0.5	3.04059	0.16	0.49	3.49177	0.48	0.3	14.79	0.27	0.43	7.82	0.66	0.36	-1.67815
chr1:134394507:134394698|134394584:+@chr1:134400341:134402436:+	ENSMUSG00000026439	Rbbp5	retinoblastoma binding protein 5 [Source:MGI Symbol;Acc:MGI:1918367]	0.64	0.34	-2.74491	0.67	0.47	-1.77903	0.73	0.37	19.01	0.77	0.5	4.34	0.74	0.91	1.36332
chr4:116284577:116284686:-@chr4:116283008:116283982:-@chr4:116278289:116278368:-	ENSMUSG00000028693	Nasp	nuclear autoantigenic sperm protein (histone-binding) [Source:MGI Symbol;Acc:MGI:1355328]	0.8	0.26	-4.20551	0.21	0.16	-2.25287	0.99	0.97	0.07	0.58	0.96	133418491602	0.95	0.91	-1.71131
chr9:21157445:21157616|21157572:+@chr9:21158126:21159473:+	ENSMUSG00000057193	Slc44a2	solute carrier family 44, member 2 [Source:MGI Symbol;Acc:MGI:1915932]	0.34	0.19	-1.85751	0.43	0.37	-1.40917	0.33	0.51	1.1	0.3	0.74	1000000000000	0.87	0.66	-1.60956
chr3:90306038:90307396:-@chr3:90304303:90304436:-@chr3:90301842:90304029:-	ENSMUSG00000001017	Chtop	chromatin target of PRMT1 [Source:MGI Symbol;Acc:MGI:1913761]	0.11	0.08	1.45276	n/a	n/a	0	0.12	0.02	39	0.06	0.19	14.88	n/a	n/a	0
chr18:34491404:34491479:+@chr18:34493947:34494018:+	ENSMUSG00000014504	Srp19	signal recognition particle 19 [Source:MGI Symbol;Acc:MGI:1913634]	0.03	0.06	2.3382	0.05	0.05	1.7088	0.55	0.43	0.64	0.2	0.39	8.88	0.62	0.41	-2.11831
chr11:80068162:80068364:+@chr11:80071016:80071138:+@chr11:80079244:80081409:+	ENSMUSG00000017686	Rhot1	ras homolog gene family, member T1 [Source:MGI Symbol;Acc:MGI:1926078]	0.86	0.63	-2.33997	0.75	0.43	-2.93801	0.83	0.74	0.41	0.81	0.4	1.55407e+08	0.33	0.48	1.16918
chr6:142601047:142601152:-@chr6:142596547:142596585:-@chr6:142594792:142594893:-	ENSMUSG00000030249	Abcc9	ATP-binding cassette, sub-family C (CFTR/MRP), member 9 [Source:MGI Symbol;Acc:MGI:1352630]	0.94	0.82	-1.57805	0.4	0.52	2.08675	0.97	0.95	0.09	0.26	0.54	9.57	0.99	0.97	-1.2295
chr14:37709441:37709530:-@chr14:37703528:37703612:-@chr14:37688121:37692948:-	ENSMUSG00000058690	Ccser2	coiled-coil serine rich 2 [Source:MGI Symbol;Acc:MGI:101859]	0.97	0.57	-3.79817	0.89	0.62	-3.15438	0.96	0.73	2.57	0.4	0.72	8.54	0.82	0.92	1.71264
chr2:76759608:76759664:-@chr2:76745365:76748010:-@chr2:76744311:76744589:-	ENSMUSG00000051747	Ttn	titin [Source:MGI Symbol;Acc:MGI:98864]	0.75	0.89	-0.17841	0.05	0.13	2.43495	0.99	0.98	0.05	0.22	0.36	6.9	n/a	n/a	0
chr16:91671594:91671710:+@chr16:91674940:91675019:+@chr16:91675646:91675793:+	ENSMUSG00000022961	Son	Son DNA binding protein [Source:MGI Symbol;Acc:MGI:98353]	0.4	0.26	-0.551862	0.3	0.4	2.06952	0.4	0.34	0.32	0.11	0.37	712.73	0.25	0.19	-1.38106
chr9:66767317:66767513:-@chr9:66737175:66737315:-@chr9:66711230:66711290:-	ENSMUSG00000036943	Rab8b	RAB8B, member RAS oncogene family [Source:MGI Symbol;Acc:MGI:2442982]	0.22	0.14	-1.89628	n/a	n/a	0	0.19	0.01	8.08	n/a	n/a	0	n/a	n/a	0
chr7:138514615:138514903:+@chr7:138517050:138517344:+@chr7:138517579:138517777:+	ENSMUSG00000063179	Pstk	phosphoseryl-tRNA kinase [Source:MGI Symbol;Acc:MGI:2685945]	0.53	0.75	1.72772	0.65	0.54	-1.7124	0.49	0.52	0.31	0.9	0.63	18.24	0.72	0.78	0.606098
chr7:31097256:31097407:+@chr7:31097525:31097726:+	ENSMUSG00000042831	Alkbh6	alkB, alkylation repair homolog 6 (E. coli) [Source:MGI Symbol;Acc:MGI:2142037]	0.63	0.8	1.50193	0.47	0.59	1.24492	0.89	0.52	1702.19	0.65	0.74	0.58	0.87	0.75	-0.989949
chr9:107762680:107762790:-@chr9:107755734|107756005:107754456:-	ENSMUSG00000032582	Rbm6	RNA binding motif protein 6 [Source:MGI Symbol;Acc:MGI:1338037]	0.38	0.13	-2.45391	0.2	0.16	-1.96797	0.5	0.16	480.52	0.33	0.16	0.57	0.12	0.13	0.525588
chr14:52723564:52723703:-@chr14:52716997:52718219:-@chr14:52703544:52704066:-	ENSMUSG00000060373	Hnrnpc	heterogeneous nuclear ribonucleoprotein C [Source:MGI Symbol;Acc:MGI:107795]	0.04	0.24	4.61219	0.1	0.13	2.14033	0.11	0.14	0.14	0.33	0.12	8.09596e+06	0.42	0.55	0.752583
chr6:83071197:83071554:-@chr6:83070766:83070870:-@chr6:83070179:83070281:-	ENSMUSG00000030035	Wbp1	WW domain binding protein 1 [Source:MGI Symbol;Acc:MGI:104710]	0.95	0.91	-1.79642	0.95	0.72	-1.55558	0.96	0.98	0.09	0.91	0.99	32.96	n/a	n/a	0
chr1:82723803:82723911:+@chr1:82724642:82724813:+@chr1:82725791:82726011:+	ENSMUSG00000026150	Mff	mitochondrial fission factor [Source:MGI Symbol;Acc:MGI:1922984]	n/a	n/a	0	0.22	0.12	-2.82742	0.12	0.08	0.52	0.45	0.21	1000000000000	n/a	n/a	0
chr9:119253584:119253626:+@chr9:119255588:119255686:+	ENSMUSG00000036138	Acaa1a	acetyl-Coenzyme A acyltransferase 1A [Source:MGI Symbol;Acc:MGI:2148491]	0.02	0.05	1.89367	0.06	0.07	1.94008	0.51	0.41	2.15	0.45	0.66	1435.23	0.76	0.49	-1.89293
chr5:124096092:124096314:-@chr5:124092428:124092625:-@chr5:124091783:124091890:-	ENSMUSG00000049550	Clip1	CAP-GLY domain containing linker protein 1 [Source:MGI Symbol;Acc:MGI:1928401]	0.88	0.91	1.43408	0.85	0.96	0.170296	0.77	0.55	20.96	0.98	0.92	0.31	n/a	n/a	0
chr11:29605535:29605591:+@chr11:29606410:29608770:+@chr11:29633633:29633840:+	ENSMUSG00000020458	Rtn4	reticulon 4 [Source:MGI Symbol;Acc:MGI:1915835]	0.3	0.8	3.73314	0.01	0.26	2.3259	0.86	0.89	0.14	0.07	0.19	1000000000000	n/a	n/a	0
chr9:45754828:45754899:-@chr9:45754589:45754651:-@chr9:45753749:45753867:-	ENSMUSG00000034908	Sidt2	SID1 transmembrane family, member 2 [Source:MGI Symbol;Acc:MGI:2446134]	0.11	0.24	1.90787	n/a	n/a	0	0.12	0.01	714.11	0.05	0.09	0.12	0.07	0.07	-1.34286
chr4:100937647:100937888:-@chr4:100870381:100870585:-@chr4:100866388:100866468:-	ENSMUSG00000028530	Jak1	Janus kinase 1 [Source:MGI Symbol;Acc:MGI:96628]	0.04	0.14	1.89441	n/a	n/a	0	0.16	0.01	12546.3	0.22	0.04	4.32	n/a	n/a	0
chr7:51747325:51747418:-@chr7:51746533:51746619:-@chr7:51745307:51746340:-	ENSMUSG00000008140	Emc10	ER membrane protein complex subunit 10 [Source:MGI Symbol;Acc:MGI:1916933]	0.3	0.35	1.60493	0.2	0.26	1.04276	0.25	0.38	5.68	0.1	0.17	0.38	n/a	n/a	0
chr17:32524518:32524762:-@chr17:32518029:32518101:-@chr17:32503369:32505092:-	ENSMUSG00000024050	Wiz	widely-interspaced zinc finger motifs [Source:MGI Symbol;Acc:MGI:1332638]	0.54	0.6	1.62067	0.46	0.41	-0.514561	0.51	0.88	10.16	0.82	0.46	1.94	0.6	0.44	-1.61724
chr5:68177865:68177905:-@chr5:68172227:68172300:-@chr5:68170199:68170272:-@chr5:68167368:68167437:-	ENSMUSG00000037685	Atp8a1	ATPase, aminophospholipid transporter (APLT), class I, type 8A, member 1 [Source:MGI Symbol;Acc:MGI:1330848]	0.12	0.45	2.42346	0.1	0.26	2.47789	0.15	0.61	1.44529e+06	0.07	0.16	0.33	0.61	0.09	-2.08972
chr9:71717881:71717954:-@chr9:71716806:71716877:-@chr9:71715879:71716085:-	ENSMUSG00000032228	Tcf12	transcription factor 12 [Source:MGI Symbol;Acc:MGI:101877]	0.34	0.21	-1.85205	0.63	0.21	-2.5387	0.43	0.4	0.65	0.82	0.39	8.14	n/a	n/a	0
chr9:44511886:44511975:-@chr9:44509029:44509169:-@chr9:44507639:44507779:-	ENSMUSG00000048537	Phldb1	pleckstrin homology-like domain, family B, member 1 [Source:MGI Symbol;Acc:MGI:2143230]	0.51	0.31	-2.48345	0.3	0.27	-1.5513	0.67	0.86	585.49	0.6	0.76	0.7	0.52	0.48	-0.674356
chr2:174159713:174159785:+@chr2:174162248:174162292:+@chr2:174167154:174167208:+	ENSMUSG00000027523	Gnas	GNAS (guanine nucleotide binding protein, alpha stimulating) complex locus [Source:MGI Symbol;Acc:MGI:95777]	0.63	0.84	4.01856	0.73	0.85	3.18181	0.7	0.78	2.49574e+10	0.74	0.88	1000000000000	0.96	0.87	-1.94729
chr7:52316111:52316262:-@chr7:52315729|52315785:52315575:-	ENSMUSG00000007837	Prrg2	proline-rich Gla (G-carboxyglutamic acid) polypeptide 2 [Source:MGI Symbol;Acc:MGI:1929596]	0.66	0.46	-1.8585	n/a	n/a	0	0.09	0.83	1000000000000	0.71	0.63	0.6	n/a	n/a	0
chr19:56452545:56452661:-@chr19:56448854:56448958:-@chr19:56447297:56447404:-	ENSMUSG00000049134	Nrap	nebulin-related anchoring protein [Source:MGI Symbol;Acc:MGI:1098765]	0.01	0.01	0.473411	0.7	0.35	-3.21642	0.01	0.01	0	0.89	0.63	1000000000000	n/a	n/a	0
chrX:54042321:54042495:+@chrX:54043054:54043223:+	ENSMUSG00000023092	Fhl1	four and a half LIM domains 1 [Source:MGI Symbol;Acc:MGI:1298387]	n/a	n/a	0	0.03	0.04	2.96814	0.12	0.08	0.35	0.04	0.06	12857	0.17	0.06	-1.56294
chr7:51807877:51808600:-@chr7:51807606|51807615:51807325:-	ENSMUSG00000060601	Nr1h2	nuclear receptor subfamily 1, group H, member 2 [Source:MGI Symbol;Acc:MGI:1352463]	0.63	0.63	0.312838	0.65	0.51	-1.7284	0.56	0.5	0.4	0.53	0.24	6.33	n/a	n/a	0
chr1:71651544:71651657:-@chr1:71650234:71650503:-@chr1:71648884:71649071:-	ENSMUSG00000026193	Fn1	fibronectin 1 [Source:MGI Symbol;Acc:MGI:95566]	0.19	0.2	0.487879	0.08	0.23	2.32029	0.32	0.72	2.87795e+08	0.09	0.5	1897.66	0.71	0.23	-1.98241
chr14:48352902:48352997:+@chr14:48353830:48353945:+@chr14:48355775:48356996:+	ENSMUSG00000021843	Ktn1	kinectin 1 [Source:MGI Symbol;Acc:MGI:109153]	0.88	0.74	-0.996585	0.82	0.63	-1.91769	0.71	0.63	0.34	0.58	0.43	22.67	0.55	0.5	-1.31771
chr9:30965280:30965432:-@chr9:30963775:30963810:-@chr9:30960999:30961084:-	ENSMUSG00000031996	Aplp2	amyloid beta (A4) precursor-like protein 2 [Source:MGI Symbol;Acc:MGI:88047]	0.46	0.31	-1.73475	0.41	0.25	-1.55308	0.38	0.19	1000000000000	0.29	0.19	1.16	0.08	0.4	2.38032
chr14:35380043:35380079:-@chr14:35368529:35368714:-@chr14:35365363:35365508:-	ENSMUSG00000021798	Ldb3	LIM domain binding 3 [Source:MGI Symbol;Acc:MGI:1344412]	0.67	0.64	-0.7607	0.06	0.26	3.60066	0.95	0.99	0.56	0.12	0.99	1000000000000	0.98	0.84	-1.26119
chr14:120795673:120795826:+@chr14:120803860:120803954:+@chr14:120828157:120830921:+	ENSMUSG00000022139	Mbnl2	muscleblind-like 2 [Source:MGI Symbol;Acc:MGI:2145597]	0.27	0.55	2.16744	0.14	0.36	1.90108	0.1	0.26	684.52	0.09	0.38	1000000000000	0.6	0.24	-2.32733
chr10:94875293:94875745:-@chr10:94855048:94855570:-@chr10:94853199:94853279:-	ENSMUSG00000020027	Socs2	suppressor of cytokine signaling 2 [Source:MGI Symbol;Acc:MGI:1201787]	0.08	0.02	-2.29201	0.16	0.04	-2.02111	0.73	0.26	155.27	0.61	0.54	0.49	n/a	n/a	0
chr8:12859036:12859479:+@chr8:12861640:12861724:+@chr8:12863759:12863862:+@chr8:12864920:12868728:+	ENSMUSG00000031441	Atp11a	ATPase, class VI, type 11A [Source:MGI Symbol;Acc:MGI:1354735]	0.25	0.21	-2.00553	0.26	0.17	-1.1009	0.16	0.53	3.5876e+09	0.23	0.35	0.51	0.53	0.31	-1.77834
chr9:15119827:15119920|15119884:+@chr9:15121333:15121999:+	ENSMUSG00000031939	Taf1d	TATA box binding protein (Tbp)-associated factor, RNA polymerase I, D [Source:MGI Symbol;Acc:MGI:1922566]	0.37	0.21	-2.13941	0.31	0.11	-2.68738	0.52	0.56	0.76	0.21	0.8	1000000000000	n/a	n/a	0
chr1:16499423:16499489:-@chr1:16476101:16476231:-@chr1:16453116:16453275:-	ENSMUSG00000025920	Stau2	staufen (RNA binding protein) homolog 2 (Drosophila) [Source:MGI Symbol;Acc:MGI:1352508]	0.46	0.18	-2.62213	0.3	0.42	2.51507	0.28	0.54	37.4	0.51	0.42	0.34	n/a	n/a	0
chr3:95021511:95021864:-@chr3:95020136:95020190:-@chr3:95010385:95010524:-	ENSMUSG00000038766	Gabpb2	GA repeat binding protein, beta 2 [Source:MGI Symbol;Acc:MGI:95612]	0.42	0.38	-1.9035	0.64	0.39	-1.58945	0.5	0.72	2.4	0.39	0.75	5.32	0.49	0.46	0.950708
chr17:31658514:31658637:+@chr17:31664255:31665346:+@chr17:31668055:31668276:+	ENSMUSG00000024038	Ndufv3	NADH dehydrogenase (ubiquinone) flavoprotein 3 [Source:MGI Symbol;Acc:MGI:1890894]	0.03	0.08	3.17407	0.03	0.12	3.6647	0.07	0.04	1000000000000	0.05	0.05	0	0.29	0.05	-1.98832
chr11:49016794:49017040:+@chr11:49026197:49026278:+@chr11:49028566:49032318:+	ENSMUSG00000046311	Zfp62	zinc finger protein 62 [Source:MGI Symbol;Acc:MGI:99662]	0.51	0.41	-0.09063	0.39	0.63	2.43873	0.83	0.55	1.72	0.15	0.57	75.9	0.27	0.34	1.07339
chr11:105071108:105071151:+@chr11:105071859:105071954:+@chr11:105082500:105082667:+	ENSMUSG00000020694	Tlk2	tousled-like kinase 2 (Arabidopsis) [Source:MGI Symbol;Acc:MGI:1346023]	0.72	0.83	1.06461	0.88	0.84	1.41855	0.7	0.52	0.99	0.91	0.5	39	n/a	n/a	0
chr6:125169604:125169655:+@chr6:125170068:125172181:+	ENSMUSG00000030337	Vamp1	vesicle-associated membrane protein 1 [Source:MGI Symbol;Acc:MGI:1313276]	0.76	0.47	-2.17335	0.17	0.6	3.39751	0.56	0.8	1.94	0.07	0.46	1.71773e+08	0.61	0.17	-1.59072
chr13:6547395:6547475:+@chr13:6548826|6548829:6548928:+	ENSMUSG00000021193	Pitrm1	pitrilysin metallepetidase 1 [Source:MGI Symbol;Acc:MGI:1916867]	0.29	0.5	1.47153	n/a	n/a	0	0.43	0.15	5.35	0.42	0.61	0.77	n/a	n/a	0
chr2:76544497:76544650:-@chr2:76543727:76544029:-@chr2:76542037:76543386:-	ENSMUSG00000051747	Ttn	titin [Source:MGI Symbol;Acc:MGI:98864]	1	0.91	-0.800545	0.62	0.59	-2.03014	1	0.9	1000000000000	0.43	0.89	1000000000000	0.86	0.76	-1.17256
chr2:181236610:181236758:+@chr2:181237581:181237640:+@chr2:181242871:181242972:+	ENSMUSG00000000827	Tpd52l2	tumor protein D52-like 2 [Source:MGI Symbol;Acc:MGI:1913564]	0.54	0.74	2.64103	0.69	0.71	-1.1743	0.67	0.34	412.16	0.77	0.66	0.57	0.57	0.76	1.84479
chr10:79224378:79224310|79224175:-@chr10:79223734:79223827:-	ENSMUSG00000035890	Rnf126	ring finger protein 126 [Source:MGI Symbol;Acc:MGI:1917544]	0.71	0.6	-1.49076	n/a	n/a	0	0.83	0.98	798.33	0.91	0.92	0.1	n/a	n/a	0
chr18:69837621:69837783|69837771:+@chr18:69841223:69841472:+	ENSMUSG00000053477	Tcf4	transcription factor 4 [Source:MGI Symbol;Acc:MGI:98506]	0.45	0.42	-1.02895	0.55	0.5	-1.55569	0.37	0.6	2.85	0.43	0.84	177.03	n/a	n/a	0
chr2:70499566:70499817:+@chr2:70510622:70510818:+@chr2:70514522:70514602:+	ENSMUSG00000014959	Gorasp2	golgi reassembly stacking protein 2 [Source:MGI Symbol;Acc:MGI:2135962]	0.03	0.23	2.75718	0.15	0.64	3.16793	0.03	0.03	0.1	0.27	0.09	14.53	n/a	n/a	0
chr4:44038321:44038432:+@chr4:44043087:44043140:+@chr4:44045273:44045726:+	ENSMUSG00000028478	Clta	clathrin, light polypeptide (Lca) [Source:MGI Symbol;Acc:MGI:894297]	0.09	0.02	-1.69478	n/a	n/a	0	0.08	0.21	22.17	0.02	0.17	3.05505e+10	n/a	n/a	0
chr7:19677288:19677603:+@chr7:19677767|19677896:19677981:+	ENSMUSG00000030409	Dmpk	dystrophia myotonica-protein kinase [Source:MGI Symbol;Acc:MGI:94906]	0.26	0.24	-1.04364	0.19	0.27	2.02882	0.39	0.33	0.3	0.19	0.37	25.48	n/a	n/a	0
chr16:23111890:23111969:+@chr16:23112424|23113240:23114205:+	ENSMUSG00000022884	Eif4a2	eukaryotic translation initiation factor 4A2 [Source:MGI Symbol;Acc:MGI:106906]	0.21	0.66	3.55057	0.13	0.26	3.0342	0.4	0.39	0.06	0.19	0.3	324667689761	0.5	0.17	-2.35321
chr5:31495366:31495512:-@chr5:31494955:31494998:-	ENSMUSG00000029145	Eif2b4	eukaryotic translation initiation factor 2B, subunit 4 delta [Source:MGI Symbol;Acc:MGI:95300]	0.45	0.22	-1.8856	0.36	0.47	0.482468	0.53	0.75	56.66	0.73	0.77	0.2	0.57	0.5	0.276483
chr3:88521248:88521392:+@chr3:88521495|88521524:88521580:+	ENSMUSG00000028057	Rit1	Ras-like without CAAX 1 [Source:MGI Symbol;Acc:MGI:108053]	n/a	n/a	0	0.39	0.19	-1.47134	0.14	0.17	0.15	0.03	0.33	6.41	n/a	n/a	0
chr8:77523459:77523790:+@chr8:77523898:77524012:+@chr8:77524549:77526351:+	ENSMUSG00000034518	Hmgxb4	HMG box domain containing 4 [Source:MGI Symbol;Acc:MGI:1918073]	0.7	0.56	-0.826462	0.75	0.63	-1.48286	0.6	0.67	0.5	0.77	0.23	24.26	0.63	0.84	1.61615
chr10:61906311:61906143|61906127:-@chr10:61903883:61903994:-	ENSMUSG00000020079	Supv3l1	suppressor of var1, 3-like 1 (S. cerevisiae) [Source:MGI Symbol;Acc:MGI:2441711]	0.13	0.34	1.73762	0.16	0.25	1.42571	0.18	0.08	0.5	0.08	0.45	224.16	0.08	0.08	-1.30257
chr12:72237542:72237678:-@chr12:72233629|72233785:72233494:-	ENSMUSG00000021079	Timm9	translocase of inner mitochondrial membrane 9 [Source:MGI Symbol;Acc:MGI:1353436]	0.44	0.81	2.33172	0.55	0.69	1.89494	0.19	0.39	0.77	0.46	0.07	7.83	0.77	0.62	-1.13153
chr3:60305100:60305345:+@chr3:60332678:60332900:+@chr3:60399516:60402024:+	ENSMUSG00000027763	Mbnl1	muscleblind-like 1 (Drosophila) [Source:MGI Symbol;Acc:MGI:1928482]	n/a	n/a	0	0.91	0.93	1.93576	0.94	0.35	1000000000000	0.95	0.55	1000000000000	n/a	n/a	0
chr7:125875908:125875967:+@chr7:125876401:125876486:+@chr7:125878782:125880538:+	ENSMUSG00000033904	Ccp110	centriolar coiled coil protein 110 [Source:MGI Symbol;Acc:MGI:2141942]	0.45	0.47	-1.47347	n/a	n/a	0	0.77	0.21	16.07	0.74	0.65	0.78	0.47	0.39	-0.419676
chr2:130105999:130106059:-@chr2:130105292:130105462:-@chr2:130105048:130105173:-	ENSMUSG00000027406	Idh3b	isocitrate dehydrogenase 3 (NAD+) beta [Source:MGI Symbol;Acc:MGI:2158650]	0.12	0.37	3.16397	0.12	0.18	1.19704	0.15	0.1	165923	0.06	0.07	0.04	0.36	0.05	-1.97826
chr13:38075262:38075355:-@chr13:38074964:38074978:-@chr13:38063267:38071675:-	ENSMUSG00000021427	Ssr1	signal sequence receptor, alpha [Source:MGI Symbol;Acc:MGI:105082]	0.45	0.1	-2.67941	0.86	0.33	-3.89057	0.17	0.21	0.28	0.87	0.49	18.05	0.01	0.56	2.35733
chr18:32573837:32573944:+@chr18:32574599:32574691:+@chr18:32579497:32579582:+	ENSMUSG00000024381	Bin1	bridging integrator 1 [Source:MGI Symbol;Acc:MGI:108092]	n/a	n/a	0	0.01	0.03	2.20753	n/a	n/a	0	0.01	0.09	1000000000000	n/a	n/a	0
chr12:111808906:111808978:+@chr12:111812955:111813071:+@chr12:111818611:111821272:+	ENSMUSG00000017843	Ppp2r5c	protein phosphatase 2, regulatory subunit B (B56), gamma isoform [Source:MGI Symbol;Acc:MGI:1349475]	0.55	0.32	-1.80789	0.64	0.58	1.02033	0.56	0.34	15429.5	0.5	0.22	1079.43	0.43	0.78	2.04427
chrX:68622974:68623079:+@chrX:68630062:68630085:+@chrX:68636375:68636450:+	ENSMUSG00000015214	Mtmr1	myotubularin related protein 1 [Source:MGI Symbol;Acc:MGI:1858271]	0.55	0.5	-1.7819	n/a	n/a	0	0.82	0.22	5.08	0.63	0.7	0.55	0.42	0.59	0.950708
chr15:89129914:89130051:-@chr15:89126383:89126460:-@chr15:89125826:89126007:-	ENSMUSG00000036529	Sbf1	SET binding factor 1 [Source:MGI Symbol;Acc:MGI:1925230]	0.92	0.74	-1.10963	0.87	0.7	-2.28644	0.96	0.9	0.27	0.62	0.95	91.94	n/a	n/a	0
chr8:98234993:98235044:+@chr8:98236225:98236263:+@chr8:98237078:98239019:+	ENSMUSG00000036564	Ndrg4	N-myc downstream regulated gene 4 [Source:MGI Symbol;Acc:MGI:2384590]	0.9	0.73	-1.93434	n/a	n/a	0	0.91	0.39	1000000000000	0.9	0.14	1000000000000	0.2	0.84	1.70621
chr19:40399237:40399322:-@chr19:40396283:40396450:-@chr19:40392512:40392558:-	ENSMUSG00000025006	Sorbs1	sorbin and SH3 domain containing 1 [Source:MGI Symbol;Acc:MGI:700014]	0.99	0.79	-3.66518	n/a	n/a	0	1	0.82	1000000000000	0.93	0.99	0.55	0.79	1	1.96925
chr16:23112424:23112534:+@chr16:23113240:23114205:+	ENSMUSG00000022884	Eif4a2	eukaryotic translation initiation factor 4A2 [Source:MGI Symbol;Acc:MGI:106906]	0.23	0.52	2.17368	0.14	0.21	2.3618	0.66	0.62	0.16	0.32	0.49	12002.1	0.43	0.14	-1.84301
chr19:7542301:7542357:-@chr19:7531950|7532913:7530790:-	ENSMUSG00000024758	Rtn3	reticulon 3 [Source:MGI Symbol;Acc:MGI:1339970]	0.58	0.67	0.357122	0.52	0.59	1.41626	0.43	0.33	0.54	0.33	0.63	9.91	n/a	n/a	0
chr8:74993763:74994126:-@chr8:74992385|74992418:74992274:-	ENSMUSG00000052488	Cherp	calcium homeostasis endoplasmic reticulum protein [Source:MGI Symbol;Acc:MGI:106417]	0.28	0.39	0.540285	0.25	0.29	1.5429	0.18	0.24	0.35	0.05	0.33	24.53	n/a	n/a	0
