# Supplementary material for: Antagonistic regulation of mRNA expression and splicing by CELF and MBNL proteins
Source: Genome Res. 2015 Jun;25(6):858–71. doi: 10.1101/gr.184390.114 (PMC4448682; doi:10.1101/gr.184390.114)
Supplement: Supplemental Material [file supp_gr.184390.114_Table_S4.xlsx]

## Sheet: Sheet1
Table S4. Gene Ontology analysis of genes containing exons responsive to both CELF1 OE and MBNL1 depletion.
Using gene expression in heart as background set
#Category	Group	No. in control genes (out of 300)	No. in splicing targets (out of 150)	Frequency in controls	Frequency in splicing targets	Delta Frequency	Median p value	Bayes Factor
heparin binding	molecular_function	1.35	5	0.0045	0.0333333	0.0288333	0.0171945	4.91852e+47
multicellular organismal development	biological_process	10.46	15	0.0348667	0.1	0.0651333	0.00732827	5.41489e+22
cell differentiation	biological_process	8.76	14	0.0292	0.0933333	0.0641333	0.00595711	1331058966830000
protein binding	molecular_function	76.42	58	0.254733	0.386667	0.131933	0.00314025	105643652334000
metal ion binding	molecular_function	52.05	38	0.1735	0.253333	0.0798333	0.0602559	3.09462e+08
dephosphorylation	biological_process	2.67	5	0.0089	0.0333333	0.0244333	0.0839124	195193
nervous system development	biological_process	5.12	8	0.0170667	0.0533333	0.0362667	0.0372905	53595.4
cytoskeleton	cellular_component	20.11	19	0.0670333	0.126667	0.0596333	0.0490573	53400.6
perinuclear region of cytoplasm	cellular_component	9.5	10	0.0316667	0.0666667	0.035	0.0825139	20768.8
calcium ion binding	molecular_function	7.16	8	0.0238667	0.0533333	0.0294667	0.102577	1976.67
centrosome	cellular_component	8.52	10	0.0284	0.0666667	0.0382667	0.0702578	1615.84
plasma membrane	cellular_component	36.47	29	0.121567	0.193333	0.0717667	0.0653437	730.051
biological_process	biological_process	69.59	22	0.231967	0.146667	-0.0853	0.0459998	371.63
microtubule cytoskeleton	cellular_component	3.38	5	0.0112667	0.0333333	0.0220667	0.12384	70.6326
microtubule	cellular_component	6.99	8	0.0233	0.0533333	0.0300333	0.102577	31.1385
spermatogenesis	biological_process	3.75	6	0.0125	0.04	0.0275	0.0782769	24.5895
molecular_function	molecular_function	72.62	26	0.242067	0.173333	-0.0687333	0.116194	22.7984
cell junction	cellular_component	10.02	11	0.0334	0.0733333	0.0399333	0.0939676	18.3878
Using gene expression in muscle as background set
#Category	Group	No. in control genes (out of 300)	No. in splicing targets (out of 150)	Frequency in controls	Frequency in splicing targets	Delta Frequency	Median p value	Bayes Factor
heparin binding	molecular_function	1.23	5	0.0041	0.0333333	0.0292333	0.0171945	2.9e+56
cell differentiation	biological_process	9.22	14	0.0307333	0.0933333	0.0626	0.00595711	1.6e+17
multicellular organismal development	biological_process	11.82	15	0.0394	0.1	0.0606	0.0187869	8560000000000000
protein binding	molecular_function	77.48	58	0.258267	0.386667	0.1284	0.00623831	1560000000000
nervous system development	biological_process	5.64	8	0.0188	0.0533333	0.0345333	0.0372905	59979067548
microtubule cytoskeleton	cellular_component	3.14	5	0.0104667	0.0333333	0.0228667	0.12384	2606960297
spermatogenesis	biological_process	3.3	6	0.011	0.04	0.029	0.0658023	5.2521e+08
biological_process	biological_process	70.92	22	0.2364	0.146667	-0.0897333	0.0266638	14507.2
centrosome	cellular_component	8.8	10	0.0293333	0.0666667	0.0373333	0.0825139	1717.76
cell junction	cellular_component	9.59	11	0.0319667	0.0733333	0.0413667	0.0500851	1698.39
perinuclear region of cytoplasm	cellular_component	8.42	10	0.0280667	0.0666667	0.0386	0.0702578	1495.21
molecular_function	molecular_function	75.92	26	0.253067	0.173333	-0.0797333	0.0572101	490.649
metal ion binding	molecular_function	53.78	38	0.179267	0.253333	0.0740667	0.0723461	379.924
microtubule binding	molecular_function	3.4	5	0.0113333	0.0333333	0.022	0.12384	24.7548
plasma membrane	cellular_component	37.31	29	0.124367	0.193333	0.0689667	0.0653437	22.2191
cytoskeleton	cellular_component	20.57	19	0.0685667	0.126667	0.0581	0.0490573	8.57216
