# Supplementary material for: Antagonistic regulation of mRNA expression and splicing by CELF and MBNL proteins
Source: Genome Res. 2015 Jun;25(6):858–71. doi: 10.1101/gr.184390.114 (PMC4448682; doi:10.1101/gr.184390.114)
Supplement: Supplemental Material [file supp_gr.184390.114_Table_S5.xlsx]

## Sheet: heart
Table S5. Gene Ontology categories for genes with 3' UTR CELF1 binding in heart, muscle, or C2C12.
Gene Ontology categories for transcripts with CELF1 binding in 3' UTRs (CLIP from heart)
#Category	Group	No. in control genes (out of 7779)	No. in CLIPped genes (out of 1866)	Frequency in control genes	Frequency in CLIPped genes	Delta Frequency	Median p value	Bayes Factor
nucleus	cellular_component	2047.28	635.39	0.263195	0.340421	0.0772261	5.92e-10	3.6e+112
protein binding	molecular_function	1419.28	443.99	0.18246	0.237883	0.0554229	8.51e-08	1.22e+73
heterochromatin	cellular_component	10.06	9.81	0.00129331	0.00525588	0.00396257	0.00310399	3.8e+71
cytoplasm	cellular_component	2217.81	652.37	0.285118	0.349525	0.0644066	7.36e-08	2.81e+61
nucleotide binding	molecular_function	762.27	253.05	0.0979967	0.135578	0.0375812	3.22e-06	8e+48
chromatin modification	biological_process	73.5	44.98	0.009449	0.0240998	0.0146508	2.65e-06	6.51e+38
nuclear matrix	cellular_component	21.11	16.01	0.00271388	0.00857786	0.00586398	0.0010821	1.07e+32
cytosol	cellular_component	348.92	127.03	0.0448567	0.0680592	0.0232025	0.000103935	1.94e+29
intracellular protein transport	biological_process	61.51	36.73	0.00790767	0.0196797	0.0117721	3.53e-05	6.12e+28
protein transport	biological_process	218.02	83.14	0.0280284	0.0445442	0.0165158	0.000548668	5.84e+28
vesicle-mediated transport	biological_process	62.41	41.43	0.00802333	0.0221961	0.0141728	1.23e-06	9.87e+27
sarcolemma	cellular_component	18.16	20.48	0.0023346	0.0109726	0.00863799	2.97e-06	2.09e+26
endosome	cellular_component	146.68	64.92	0.0188571	0.0347832	0.015926	7.68e-05	9.64e+25
positive regulation of endothelial cell migration	biological_process	7.8	8.86	0.00100277	0.00474681	0.00374404	0.00199449	4.35e+24
actin cytoskeleton organization	biological_process	40.33	27.02	0.00518475	0.0144771	0.00929238	7.72e-05	4.36e+21
zinc ion binding	molecular_function	379.73	129.44	0.0488174	0.069352	0.0205346	0.000469108	3.52e+21
sarcoplasmic reticulum	cellular_component	13.7	13.24	0.00176117	0.00709387	0.0053327	0.000428168	3.44e+21
Z disc	cellular_component	26.88	20.22	0.00345564	0.010834	0.00737832	0.00018775	8.44e+18
ATP hydrolysis coupled proton transport	biological_process	6.22	7.55	0.000799632	0.00404507	0.00324544	0.00328449	3.5e+18
identical protein binding	molecular_function	155.61	63.39	0.020005	0.0339654	0.0139603	0.000628368	8.43e+17
phosphorylation	biological_process	272.15	102	0.0349872	0.0546461	0.0196589	0.000131822	3.62e+17
transport	biological_process	666.63	204.67	0.0857008	0.109657	0.0239563	0.00153498	1.61e+17
protein complex	cellular_component	165.57	69.72	0.0212854	0.0373553	0.0160699	0.000104574	7.17e+16
phosphoprotein phosphatase activity	molecular_function	53.94	28.2	0.00693448	0.015108	0.00817354	0.00166914	1.67e+16
protein kinase binding	molecular_function	119.6	53.58	0.0153757	0.0287052	0.0133296	0.000318063	8410000000000000
cytoskeletal protein binding	molecular_function	11.87	13.83	0.00152595	0.00740904	0.00588309	0.000145927	6440000000000000
methylated histone residue binding	molecular_function	14.21	10.45	0.00182679	0.00559914	0.00377235	0.00971178	2620000000000000
kinase activity	molecular_function	273.58	101.75	0.0351711	0.054512	0.019341	0.000161087	2450000000000000
RNA binding	molecular_function	228.55	85.97	0.0293821	0.0460581	0.0166761	0.000429462	2210000000000000
regulation of transcription, DNA-dependent	biological_process	707.75	217.26	0.0909872	0.116401	0.0254143	0.00107882	308000000000000
early endosome	cellular_component	34.45	22.71	0.00442886	0.012168	0.00773919	0.00040522	218000000000000
M band	cellular_component	2.09	5.35	0.000268676	0.00286653	0.00259786	0.00382398	208000000000000
protein dephosphorylation	biological_process	48.92	25.62	0.00628909	0.0137253	0.00743623	0.00221431	103000000000000
SNARE binding	molecular_function	3.99	6.98	0.000512948	0.00373989	0.00322695	0.00160477	41100000000000
transcription, DNA-dependent	biological_process	677.56	205.43	0.087106	0.110065	0.0229588	0.00211964	1260000000000
metal ion binding	molecular_function	1303.7	373.92	0.167601	0.200337	0.032736	0.00101325	931670000000
membrane coat	cellular_component	8.09	8.24	0.00104005	0.00441479	0.00337474	0.00555649	390440000000
protein serine/threonine kinase activity	molecular_function	155.71	61.51	0.0200179	0.0329541	0.0129362	0.00130482	256036000000
positive regulation of neuron apoptotic process	biological_process	15.23	11	0.00195803	0.00589377	0.00393574	0.00972563	203147000000
phosphatidylinositol phosphorylation	biological_process	5.65	7.2	0.000726393	0.00385766	0.00313126	0.00441391	89236874511
ephrin receptor signaling pathway	biological_process	8.96	7.63	0.00115192	0.00408826	0.00293634	0.0148348	83660962221
endosome to lysosome transport	biological_process	4.7	9.49	0.000604206	0.00508431	0.00448011	0.000123589	50932276707
lipid particle	cellular_component	12.53	12.97	0.00161083	0.00694935	0.00533851	0.000410417	23941466482
ubiquitin protein ligase binding	molecular_function	50.17	26.35	0.00644974	0.0141166	0.00766688	0.00198877	7862312367
ubiquitin-protein ligase activity	molecular_function	71.89	42.79	0.00924198	0.022928	0.013686	8.62e-06	4887657786
calcium-dependent phospholipid binding	molecular_function	10.73	5.66	0.00137949	0.00303285	0.00165336	0.138714	6.89048e+08
mitochondrion	cellular_component	631.06	189.99	0.0811277	0.101791	0.0206633	0.0050994	232817822
positive regulation of transcription, DNA-dependent	biological_process	202.08	72.83	0.0259792	0.0390202	0.013041	0.003238	1.11363e+08
transferase activity, transferring phosphorus-containing groups	molecular_function	215.08	76.26	0.0276505	0.0408572	0.0132067	0.00402719	1.86174e+07
manganese ion binding	molecular_function	15.57	9.45	0.00200162	0.00506337	0.00306175	0.0283777	1.78712e+07
postsynaptic density	cellular_component	41.26	18.61	0.00530433	0.00997002	0.00466569	0.0334191	1.28856e+07
T-tubule	cellular_component	12.98	11.78	0.0016687	0.00631188	0.00464318	0.00115291	8.77037e+06
proton transport	biological_process	22.44	11.88	0.00288487	0.0063651	0.00348022	0.0387455	8.17038e+06
ATP binding	molecular_function	595.56	180.49	0.0765643	0.0967006	0.0201362	0.00473801	3.85036e+06
ionotropic glutamate receptor binding	molecular_function	6.47	5.78	0.000831799	0.00309707	0.00226527	0.0255378	1.29145e+06
protein kinase activity	molecular_function	218.38	75.49	0.0280748	0.0404447	0.01237	0.00808572	1.12662e+06
peptidyl-serine phosphorylation	biological_process	22.38	14.19	0.00287711	0.00760212	0.004725	0.00556906	960080
I band	cellular_component	5.82	5.39	0.000748191	0.00288825	0.00214006	0.0283732	904313
transcription factor complex	cellular_component	93.06	34.82	0.0119636	0.0186569	0.00669329	0.0327721	895090
transferase activity	molecular_function	568.07	175.9	0.0730303	0.0942391	0.0212088	0.00216388	447741
ion channel binding	molecular_function	19.05	12.66	0.00244904	0.006782	0.00433297	0.00702499	295871
nucleoplasm	cellular_component	53.02	24.53	0.00681618	0.0131413	0.00632511	0.00900828	231627
regulation of transcription from RNA polymerase II promoter	biological_process	86.18	33.82	0.0110792	0.018119	0.00703978	0.020628	211565
cellular protein localization	biological_process	14	10.45	0.00179981	0.00559858	0.00379876	0.0105194	210694
neuromuscular junction	cellular_component	15.47	13.31	0.00198882	0.0071316	0.00514278	0.000959237	197955
basolateral plasma membrane	cellular_component	47.29	21.49	0.00607952	0.0115136	0.00543411	0.0183327	76800.1
protein complex assembly	biological_process	16.26	9.78	0.00209037	0.00523983	0.00314945	0.0277943	66117.5
protein phosphorylation	biological_process	256.64	87.25	0.0329934	0.0467449	0.0137515	0.00530757	57414.1
brain development	biological_process	40.26	17.89	0.00517582	0.00958499	0.00440918	0.0344396	39321.2
chromatin binding	molecular_function	120.71	45.8	0.0155183	0.0245395	0.00902124	0.00870866	26452.2
late endosome	cellular_component	26.33	15.08	0.003385	0.00807938	0.00469437	0.0103487	26065
Golgi apparatus	cellular_component	408.79	133.46	0.0525532	0.0715046	0.0189514	0.00235588	19716.9
outflow tract morphogenesis	biological_process	16.18	8.53	0.00208009	0.00457043	0.00249034	0.095316	18463
caveola	cellular_component	24.24	13.9	0.00311631	0.0074468	0.00433049	0.0118003	6732.66
ligase activity	molecular_function	138.37	58.38	0.0177886	0.0312806	0.0134919	0.000440745	5492.8
negative regulation of insulin receptor signaling pathway	biological_process	13.03	6.02	0.00167515	0.0032251	0.00154995	0.2378	4349.04
small GTPase mediated signal transduction	biological_process	85.42	31.46	0.0109816	0.0168553	0.00587368	0.0582347	3812.82
insulin receptor signaling pathway	biological_process	14.1	10.15	0.0018127	0.00543734	0.00362465	0.0157746	3308.69
phosphatase activity	molecular_function	44.81	19.68	0.00576072	0.0105436	0.00478287	0.0306671	2739.42
syntaxin binding	molecular_function	11.99	9.94	0.00154144	0.00532563	0.00378419	0.00597054	2712.6
nucleosome assembly	biological_process	15.02	9.93	0.00193093	0.00532029	0.00338935	0.0184528	2694.31
receptor tyrosine kinase binding	molecular_function	11.67	6	0.00150028	0.00321456	0.00171428	0.138364	1514.71
protein autoubiquitination	biological_process	9.5	8.58	0.00122132	0.00459702	0.0033757	0.00852901	1479.84
intercalated disc	cellular_component	7.98	9.22	0.00102593	0.00494059	0.00391466	0.00193001	1173.33
proteasomal ubiquitin-dependent protein catabolic process	biological_process	16.14	13.78	0.00207498	0.00738341	0.00530843	0.000941774	1098.74
protein C-terminus binding	molecular_function	72.33	30.82	0.00929868	0.0165131	0.00721441	0.00947289	1093.19
heat shock protein binding	molecular_function	8.64	8.19	0.00111077	0.00438901	0.00327824	0.00574881	950.093
membrane	cellular_component	2382.04	620.22	0.306231	0.332301	0.0260703	0.0342477	756.302
trans-Golgi network	cellular_component	38.48	19.83	0.00494693	0.0106246	0.00567768	0.00923039	718.9
embryonic placenta development	biological_process	6.54	6.6	0.000840768	0.00353608	0.00269532	0.00992899	635.741
protein complex binding	molecular_function	94.31	37.62	0.0121242	0.020155	0.00803083	0.0128025	548.421
protein folding	biological_process	33.73	17.7	0.00433629	0.00948387	0.00514758	0.0124169	483.275
protein ubiquitination	biological_process	51.84	28.78	0.00666442	0.0154207	0.00875632	0.000517122	441.986
protein domain specific binding	molecular_function	87.95	35.49	0.0113067	0.0190157	0.00770905	0.0127671	433.389
hydrogen ion transmembrane transporter activity	molecular_function	7.66	5.16	0.000984776	0.00276427	0.00177949	0.0641919	381.81
positive regulation of translation	biological_process	14.98	7.77	0.00192581	0.00416249	0.00223668	0.114648	373.208
cytoplasmic vesicle	cellular_component	178.75	59.01	0.0229798	0.0316155	0.00863572	0.0369329	364.243
activation of MAPKK activity	biological_process	12.72	6.95	0.00163529	0.00372362	0.00208834	0.0872265	336.734
regulation of protein localization	biological_process	13.57	8.4	0.00174454	0.00450085	0.00275631	0.040033	262.704
protein serine/threonine phosphatase activity	molecular_function	8.08	8.62	0.00103877	0.00461822	0.00357945	0.00327329	261.423
cell proliferation	biological_process	67.93	27.76	0.0087329	0.0148739	0.00614105	0.0202652	254.056
sprouting angiogenesis	biological_process	7.57	5.44	0.0009732	0.00291496	0.00194176	0.0528444	228.314
neuron projection	cellular_component	105.25	39.38	0.0135307	0.0210988	0.00756805	0.0187182	213.963
mRNA processing	biological_process	104.88	38.83	0.0134833	0.0208038	0.0073205	0.0206512	159.197
cell cortex	cellular_component	30.76	16.47	0.00395442	0.00882451	0.0048701	0.0132815	156.147
cell-cell adherens junction	cellular_component	7.52	9.89	0.000966784	0.00529886	0.00433207	0.00067707	141.584
filopodium	cellular_component	14.14	10.44	0.00181783	0.00559383	0.003776	0.012706	129.616
canonical Wnt receptor signaling pathway	biological_process	27.13	13.95	0.0034878	0.00747338	0.00398558	0.0296268	69.2574
positive regulation of actin filament polymerization	biological_process	13.53	7.21	0.00173939	0.00386268	0.00212329	0.0882671	55.7692
protein phosphatase binding	molecular_function	19.69	11.65	0.0025313	0.00624109	0.00370979	0.0238837	54.3798
coated pit	cellular_component	15	11.06	0.00192841	0.00592552	0.00399711	0.00837432	52.7963
endocytosis	biological_process	59.35	25.82	0.00762991	0.0138332	0.00620324	0.012158	39.4151
mitochondrial outer membrane	cellular_component	34.22	20.49	0.00439927	0.0109782	0.00657894	0.00161705	39.2135
midbody	cellular_component	34.45	15.58	0.00442885	0.0083485	0.00391965	0.0487903	34.1331
histone-lysine N-methyltransferase activity	molecular_function	5.98	5.29	0.000768787	0.0028345	0.00206572	0.0439902	32.5806
response to estradiol stimulus	biological_process	5.55	5.52	0.000713458	0.00295754	0.00224408	0.0274165	26.4632
response to toxic substance	biological_process	16.48	6.73	0.0021187	0.00360594	0.00148724	0.271838	25.1197
GTP binding	molecular_function	138.4	45.62	0.0177925	0.0244431	0.00665061	0.069988	23.9765
regulation of translation	biological_process	27.43	15.3	0.00352637	0.00819635	0.00466997	0.0104603	23.9666
protein kinase C binding	molecular_function	16.83	8.9	0.00216365	0.00476833	0.00260468	0.0830073	23.6293
basal plasma membrane	cellular_component	7.61	6.78	0.000978324	0.00363278	0.00265446	0.0152262	19.3413
enzyme binding	molecular_function	93.01	36.58	0.0119572	0.0195982	0.00764101	0.0167458	18.7664
protein polyubiquitination	biological_process	18.42	12.81	0.00236806	0.0068627	0.00449464	0.00642634	16.448
mitochondrial respiratory chain complex I	cellular_component	15.29	6	0.00196559	0.00321473	0.00124915	0.273622	13.2492
ligand-dependent nuclear receptor transcription coactivator activity	molecular_function	7.1	7.15	0.000912718	0.00383067	0.00291796	0.00598273	12.5968
blood vessel morphogenesis	biological_process	8.47	6.74	0.00108889	0.0036114	0.0025225	0.0220168	10.0244
Wnt receptor signaling pathway	biological_process	72.82	29.2	0.00936164	0.0156442	0.00628255	0.0278492	6.86337
magnesium ion binding	molecular_function	67.49	24.71	0.00867635	0.0132398	0.00456342	0.0736754	6.67141
ephrin receptor binding	molecular_function	12.48	7.66	0.00160442	0.00410411	0.00249968	0.0474445	6.14985
kinase binding	molecular_function	21.1	10.15	0.00271261	0.00543822	0.00272561	0.0920259	6.10488
zinc ion transport	biological_process	9.6	5.18	0.00123417	0.00277517	0.00154099	0.165581	6.04411
spleen development	biological_process	10.63	5.16	0.00136659	0.00276458	0.00139799	0.201611	5.21861
positive regulation of reactive oxygen species metabolic process	biological_process	9.42	5.87	0.00121105	0.00314489	0.00193385	0.103361	5.03788
mRNA binding	molecular_function	18.39	9.89	0.00236421	0.00529917	0.00293496	0.0503383	4.97108
nucleotidyltransferase activity	molecular_function	33.28	11.6	0.00427844	0.00621524	0.0019368	0.334215	4.92865
sequence-specific DNA binding RNA polymerase II transcription factor activity	molecular_function	19.59	10.26	0.00251847	0.00549648	0.00297801	0.0555091	4.88648
protein heterodimerization activity	molecular_function	160.87	53.5	0.0206811	0.0286643	0.00798322	0.0379031	4.31664
nucleic acid binding	molecular_function	329.67	95.66	0.042382	0.0512508	0.00886881	0.105501	3.93323
peptidyl-prolyl cis-trans isomerase activity	molecular_function	12.51	7.17	0.0016083	0.00384158	0.00223328	0.0750343	3.36627
regulation of growth	biological_process	21.34	12.19	0.00274339	0.00653072	0.00378733	0.0268451	2.78429
blood vessel development	biological_process	25.36	11.89	0.00326026	0.00636994	0.00310969	0.0635279	2.69599
transcription regulatory region DNA binding	molecular_function	69.88	25.35	0.00898364	0.0135819	0.00459826	0.0708213	2.65214
histone deacetylase binding	molecular_function	21.74	11.9	0.00279495	0.00637536	0.00358042	0.0253886	2.36391
protein K63-linked ubiquitination	biological_process	5.59	5.41	0.000718627	0.00289914	0.00218051	0.0176054	1.82785
regulation of gene expression	biological_process	43.36	17.5	0.00557433	0.00937522	0.00380089	0.0754564	1.78622
protein localization to nucleus	biological_process	7.6	6.84	0.00097706	0.00366483	0.00268777	0.0149603	1.57122
GTPase activator activity	molecular_function	75.74	27.05	0.00973704	0.0144921	0.00475509	0.0878498	1.55516
protein localization to plasma membrane	biological_process	12.54	7.39	0.00161213	0.00395919	0.00234707	0.0743375	1.46216
negative regulation of transcription from RNA polymerase II promoter	biological_process	217.76	67.63	0.0279948	0.0362337	0.00823885	0.0524012	1.43137
regulation of small GTPase mediated signal transduction	biological_process	12.27	7.83	0.00157744	0.00419493	0.00261749	0.0473395	1.26671
transcription coactivator activity	molecular_function	49.42	21.07	0.00635324	0.0112885	0.00493527	0.0311258	1.25446
lateral plasma membrane	cellular_component	8.6	7.75	0.0011056	0.00415208	0.00304648	0.00940915	1.19585
RNA polymerase II distal enhancer sequence-specific DNA binding transcription factor activity	molecular_function	24.56	12.02	0.0031574	0.0064397	0.00328229	0.0571576	1.15495
PDZ domain binding	molecular_function	44.57	17.16	0.00572982	0.00919404	0.00346422	0.106476	1.031
heart development	biological_process	65.42	26.38	0.00841031	0.0141338	0.00572347	0.0242816	1.00391
ADP binding	molecular_function	10.1	6	0.00129848	0.00321459	0.00191611	0.0753824	0.927349
oxidoreductase activity, acting on single donors with incorporation of molecular oxygen, incorporation of two atoms of oxygen	molecular_function	27.9	12	0.00358684	0.0064298	0.00284296	0.100431	0.906319
vesicle	cellular_component	15.29	8.17	0.00196563	0.00437813	0.00241249	0.0714013	0.865179
cell-cell junction	cellular_component	47.43	18.83	0.00609764	0.010089	0.00399137	0.0671069	0.846515
actin filament organization	biological_process	14.09	8.35	0.00181142	0.00447373	0.00266231	0.0519466	0.825959
negative regulation of apoptotic process	biological_process	194.76	59.91	0.025038	0.0320988	0.00706083	0.0967243	0.773812
positive regulation of neuron projection development	biological_process	29.69	12.27	0.00381683	0.00657385	0.00275702	0.115131	0.76464
peroxisomal membrane	cellular_component	16.08	8.47	0.00206723	0.00453775	0.00247052	0.0679578	0.753338
perinuclear region of cytoplasm	cellular_component	159.57	57.75	0.0205141	0.0309427	0.0104286	0.00996386	0.750088
protein autophosphorylation	biological_process	61.02	24.89	0.00784461	0.0133337	0.00548911	0.0233113	0.595698
tricarboxylic acid cycle	biological_process	6.11	6.53	0.000785473	0.00349805	0.00271258	0.00978809	0.594861
ruffle membrane	cellular_component	13.22	8.03	0.00169953	0.00430232	0.00260279	0.0467994	0.546304
spliceosomal complex	cellular_component	47	18.25	0.0060422	0.0097776	0.0037354	0.0987442	0.485862
cytoskeleton	cellular_component	405.49	116.02	0.0521294	0.0621605	0.0100312	0.0980732	0.469972
activation of JUN kinase activity	biological_process	7.11	5.51	0.00091406	0.00295195	0.00203789	0.0446919	0.445925
beta-catenin binding	molecular_function	24.82	11.1	0.00319082	0.00594726	0.00275644	0.0845749	0.420826
DNA binding	molecular_function	661.41	178.11	0.0850299	0.0954275	0.0103976	0.169332	0.416155
protein K48-linked ubiquitination	biological_process	8.98	8.79	0.00115446	0.00471067	0.00355621	0.00333904	0.41583
protein tyrosine phosphatase activity	molecular_function	42.77	15.83	0.00549846	0.00848083	0.00298237	0.135339	0.379789
negative regulation of MAP kinase activity	biological_process	15.29	7.16	0.00196562	0.00383629	0.00187067	0.170587	0.368826
mitochondrion organization	biological_process	13.31	7.8	0.00171109	0.00417891	0.00246782	0.0554005	0.351205
apoptotic process	biological_process	233.76	73.27	0.0300519	0.0392593	0.00920746	0.0470138	0.34206
tight junction	cellular_component	31.66	14.73	0.00407021	0.00789177	0.00382156	0.0439592	0.341623
dephosphorylation	biological_process	58.79	23.52	0.00755784	0.0126015	0.00504364	0.0369265	0.307969
peroxisome	cellular_component	46.58	19.22	0.0059883	0.0102965	0.00430825	0.0538518	0.28666
positive regulation of transcription from RNA polymerase II promoter	biological_process	280.49	82.66	0.0360594	0.044287	0.0082276	0.10314	0.272063
transport vesicle	cellular_component	6.17	5.94	0.000793235	0.00318299	0.00238975	0.025636	0.250394
SCF ubiquitin ligase complex	cellular_component	11.21	6.31	0.0014411	0.00338043	0.00193933	0.11719	0.24428
RNA splicing	biological_process	79.03	28.26	0.01016	0.01514	0.00497997	0.0645916	0.212261
mitochondrial membrane	cellular_component	20.57	9.28	0.00264444	0.00497252	0.00232808	0.145674	0.21062
positive regulation of endothelial cell proliferation	biological_process	20.14	9.48	0.00258917	0.00507937	0.0024902	0.100423	0.196441
integral to endoplasmic reticulum membrane	cellular_component	18.14	10.64	0.00233199	0.00570031	0.00336832	0.0328667	0.183718
positive regulation of protein phosphorylation	biological_process	42.86	16.94	0.00550994	0.00907617	0.00356623	0.0806596	0.182892
cell junction	cellular_component	221.32	64.65	0.0284527	0.0346384	0.00618572	0.172165	0.171677
response to stress	biological_process	42.97	17.39	0.00552416	0.00931787	0.00379371	0.0752405	0.16837
oxidoreductase activity, acting on paired donors, with incorporation or reduction of molecular oxygen, 2-oxoglutarate as one donor, and incorporation of one atom each of oxygen into both donors	molecular_function	12.12	6.07	0.00155814	0.00325249	0.00169435	0.138628	0.15927
positive regulation of protein binding	biological_process	11.91	6.77	0.00153116	0.00362759	0.00209643	0.0872796	0.158277
apical plasma membrane	cellular_component	77.06	26.64	0.00990673	0.0142729	0.0043662	0.115602	0.149788
electron transport chain	biological_process	37.81	14.1	0.00486064	0.00755496	0.00269431	0.1808	0.145927
mRNA transport	biological_process	24.64	10.97	0.00316769	0.00587649	0.00270879	0.115831	0.144068
chaperone binding	molecular_function	17.47	8.41	0.00224593	0.00450595	0.00226003	0.124602	0.141284
positive regulation of DNA replication	biological_process	15.01	7.79	0.00192967	0.00417392	0.00224425	0.113721	0.136866
intracellular	cellular_component	342.25	95.49	0.0439991	0.0511618	0.00716273	0.216604	0.133647
recycling endosome	cellular_component	14.18	7.87	0.001823	0.00421637	0.00239336	0.079882	0.123502
mitochondrial inner membrane	cellular_component	137.65	41.75	0.0176957	0.022369	0.00467335	0.189471	0.115878
centrosome	cellular_component	150.89	45.54	0.0193981	0.0243992	0.00500113	0.203795	0.111038
ubiquitin-specific protease activity	molecular_function	13.52	7.43	0.00173809	0.00398051	0.00224243	0.0874383	0.104565
histone binding	molecular_function	18.09	9.11	0.00232558	0.00488051	0.00255494	0.0764989	0.104317
regulation of the force of heart contraction	biological_process	4.01	5.07	0.000515513	0.00271711	0.0022016	0.0169516	0.102873
triglyceride metabolic process	biological_process	11.39	5.82	0.0014643	0.00311821	0.00165391	0.137723	0.0993231
extracellular vesicular exosome	cellular_component	22.79	10.3	0.00292984	0.00551831	0.00258847	0.113689	0.0946104
lysosome	cellular_component	108.91	35.55	0.0140014	0.0190472	0.0050458	0.133477	0.0939594
synaptic vesicle	cellular_component	41.06	14.72	0.00527861	0.00788687	0.00260826	0.201491	0.0927146
SNARE complex	cellular_component	8.46	6.65	0.00108761	0.00356214	0.00247453	0.0229298	0.0926359
Golgi membrane	cellular_component	34.27	14.7	0.00440566	0.00787642	0.00347076	0.0758504	0.0853944
protein monoubiquitination	biological_process	5.57	5.6	0.000716085	0.00300038	0.0022843	0.0228493	0.0840748
nuclear chromatin	cellular_component	37.95	14.28	0.00487881	0.00765034	0.00277152	0.153987	0.0814466
induction of apoptosis	biological_process	71.76	23.54	0.00922539	0.0126122	0.00338686	0.201129	0.0814223
cytoplasmic mRNA processing body	cellular_component	6	5.97	0.000771331	0.00319755	0.00242622	0.0161988	0.0806322
transferase activity, transferring acyl groups	molecular_function	56.41	20.7	0.00725197	0.0110902	0.0038382	0.11483	0.0779551
cellular component movement	biological_process	4	5.3	0.000514235	0.00283913	0.00232489	0.0166215	0.0701035
protein ubiquitination involved in ubiquitin-dependent protein catabolic process	biological_process	12.75	8.99	0.0016391	0.00481773	0.00317863	0.0248134	0.06412
regulation of Rho protein signal transduction	biological_process	20.68	9.44	0.00265857	0.00505825	0.00239968	0.112153	0.0640984
protein complex scaffold	molecular_function	9.89	5.74	0.00127144	0.00307537	0.00180393	0.103982	0.0640351
retrograde transport, endosome to Golgi	biological_process	5.5	5.26	0.000707063	0.00281782	0.00211076	0.0286686	0.0629802
ER to Golgi vesicle-mediated transport	biological_process	9.77	6.49	0.00125596	0.00347719	0.00222123	0.0640935	0.0613273
glycogen metabolic process	biological_process	7.54	6.25	0.000969368	0.00334837	0.00237901	0.0314825	0.0593054
positive regulation of peptidyl-serine phosphorylation	biological_process	16.75	8.15	0.00215327	0.00436711	0.00221383	0.115295	0.0581638
response to DNA damage stimulus	biological_process	158.23	45.68	0.0203416	0.0244751	0.00413346	0.298504	0.0570697
GTPase activity	molecular_function	68.53	23.81	0.00881003	0.0127567	0.00394665	0.140793	0.0558179
neuron migration	biological_process	34.97	13.84	0.00449572	0.00741547	0.00291975	0.125532	0.0526471
response to calcium ion	biological_process	15.56	8.44	0.00200036	0.004522	0.00252163	0.0916882	0.0515207
transcription factor binding	molecular_function	106.94	34.31	0.013748	0.0183811	0.00463305	0.135135	0.0510163
collagen binding	molecular_function	16.05	7.59	0.00206337	0.00406722	0.00200385	0.126445	0.0498761
acid-amino acid ligase activity	molecular_function	11.04	7.43	0.00141927	0.00398119	0.00256191	0.0406583	0.0496059
actin cytoskeleton	cellular_component	64.95	22.28	0.00834989	0.011935	0.00358515	0.172808	0.0424635
unfolded protein binding	molecular_function	17.91	8.76	0.0023024	0.004694	0.0023916	0.0958277	0.0420677
stress fiber	cellular_component	17.11	8.38	0.00219965	0.00449012	0.00229047	0.0947861	0.0414798
T cell differentiation in thymus	biological_process	12.08	6.84	0.00155299	0.00366476	0.00211176	0.0754062	0.0409385
clathrin-coated vesicle	cellular_component	12.54	7.18	0.00161211	0.00384692	0.00223481	0.0743509	0.0375568
cytoplasmic membrane-bounded vesicle	cellular_component	28.45	10.97	0.00365753	0.00587759	0.00222006	0.184786	0.035897
Golgi organization	biological_process	15.96	7.05	0.00205179	0.00377793	0.00172614	0.185078	0.0358689
synapse	cellular_component	145.66	42.11	0.0187259	0.0225614	0.00383552	0.307249	0.0357534
response to oxidative stress	biological_process	37.03	14.52	0.00476047	0.00777931	0.00301884	0.126273	0.0354366
lamellipodium	cellular_component	40.9	15.58	0.00525805	0.00834709	0.00308904	0.130759	0.0349133
in utero embryonic development	biological_process	98.62	32.22	0.0126783	0.0172616	0.0045833	0.141874	0.0329477
cellular protein modification process	biological_process	19.14	7.76	0.00246058	0.00415763	0.00169706	0.230714	0.031902
phosphatidylinositol-4,5-bisphosphate binding	molecular_function	10.8	5.21	0.00138845	0.00279116	0.00140271	0.213464	0.0299376
negative regulation of protein binding	biological_process	9.48	5.34	0.00121875	0.00286091	0.00164216	0.157315	0.0293241
endoplasmic reticulum	cellular_component	433.33	115.7	0.055708	0.061993	0.00628497	0.284168	0.0282842
cellular calcium ion homeostasis	biological_process	27.23	10.49	0.00350058	0.00562071	0.00212014	0.204547	0.0277262
plasma membrane	cellular_component	1168.97	293.83	0.150281	0.157428	0.00714691	0.450078	0.0273538
apical part of cell	cellular_component	40.36	14.81	0.00518858	0.00793446	0.00274588	0.172852	0.0272024
guanyl-nucleotide exchange factor activity	molecular_function	61.92	19.57	0.00796032	0.0104853	0.002525	0.315121	0.0261716
hemopoiesis	biological_process	28.85	11.01	0.00370887	0.00589882	0.00218995	0.227437	0.0259483
positive regulation of cysteine-type endopeptidase activity involved in apoptotic process	biological_process	11.06	5.42	0.00142188	0.00290421	0.00148233	0.199149	0.0258531
regulation of catalytic activity	biological_process	31.86	12.4	0.00409591	0.00664355	0.00254764	0.175952	0.0256385
protein heterooligomerization	biological_process	28.25	11.04	0.00363175	0.00591464	0.00228289	0.167484	0.025591
endoplasmic reticulum membrane	cellular_component	55.64	19.13	0.00715295	0.0102506	0.00309763	0.198056	0.0252522
GTP catabolic process	biological_process	60.4	19.49	0.00776488	0.0104418	0.00267691	0.286876	0.0244309
heterotrimeric G-protein complex	cellular_component	13.14	6.5	0.00168919	0.00348287	0.00179368	0.159637	0.0240226
phospholipid biosynthetic process	biological_process	19.61	9.39	0.00252107	0.0050301	0.00250904	0.0884837	0.0232901
cell migration	biological_process	50.17	17.66	0.00644983	0.00946251	0.00301267	0.171587	0.0232844
cellular process	biological_process	11.15	6.27	0.00143342	0.00335916	0.00192574	0.102173	0.0232226
cyclin-dependent protein serine/threonine kinase activity	molecular_function	12.57	6.38	0.00161598	0.00341838	0.0018024	0.137922	0.0231588
negative regulation of transcription, DNA-dependent	biological_process	181.81	51.94	0.0233732	0.0278262	0.00445296	0.259631	0.0227423
respiratory chain	cellular_component	21.19	7	0.00272402	0.00375052	0.00102651	0.471712	0.0227388
protein stabilization	biological_process	22.22	9.77	0.00285662	0.00523512	0.0023785	0.144394	0.0226319
cell cycle	biological_process	263.08	72.27	0.0338212	0.0387225	0.00490122	0.292967	0.0219713
positive regulation of protein kinase activity	biological_process	18.51	7.7	0.00237962	0.0041251	0.00174548	0.230547	0.0217846
cell surface	cellular_component	178.5	50.13	0.0229477	0.0268592	0.00391144	0.311454	0.0215651
actin binding	molecular_function	125.8	36.98	0.0161727	0.0198121	0.00363938	0.293989	0.0207992
brown fat cell differentiation	biological_process	12.94	6.02	0.00166354	0.00322536	0.00156183	0.23708	0.020782
sequence-specific DNA binding	molecular_function	192.8	53.16	0.024786	0.028482	0.00369594	0.365955	0.0206501
muscle contraction	biological_process	13.39	6.39	0.00172133	0.00342411	0.00170277	0.159655	0.020383
cytoplasmic stress granule	cellular_component	7.95	5.12	0.00102204	0.00274192	0.00171989	0.148908	0.02037
transcription from RNA polymerase II promoter	biological_process	39.69	14.08	0.00510252	0.00754381	0.00244129	0.233521	0.0192273
intracellular membrane-bounded organelle	cellular_component	226.04	62.11	0.0290594	0.0332752	0.0042158	0.357697	0.0189535
DNA repair	biological_process	133.83	37.31	0.0172049	0.0199904	0.00278555	0.388719	0.017982
neuron projection development	biological_process	35.82	12.58	0.00460498	0.00673964	0.00213466	0.269412	0.0178551
negative regulation of neuron apoptotic process	biological_process	45.3	14.92	0.0058237	0.0079934	0.0021697	0.261795	0.0166336
oxidoreductase activity, acting on the CH-OH group of donors, NAD or NADP as acceptor	molecular_function	16.31	6.52	0.00209683	0.00349333	0.0013965	0.307022	0.0163792
histone deacetylase complex	cellular_component	10.49	5.25	0.0013486	0.00281231	0.00146371	0.186843	0.0161865
iron-sulfur cluster binding	molecular_function	29.51	10.86	0.00379374	0.00581884	0.0020251	0.228994	0.0161585
protein N-terminus binding	molecular_function	40.09	14.38	0.00515381	0.00770489	0.00255108	0.215994	0.0161313
cellular response to amino acid stimulus	biological_process	12.9	5.21	0.00165842	0.00279135	0.00113293	0.360487	0.0155779
response to drug	biological_process	46.77	15.08	0.00601267	0.00807932	0.00206666	0.340851	0.0151867
phospholipid binding	molecular_function	119.42	33.57	0.0153524	0.0179858	0.00263348	0.412455	0.0149022
ubiquitin binding	molecular_function	11.79	6.84	0.00151565	0.00366486	0.00214921	0.0866372	0.0148343
Rho GTPase binding	molecular_function	11.52	5.66	0.00148098	0.00303305	0.00155207	0.213513	0.0144012
beta-tubulin binding	molecular_function	9.87	5.37	0.00126892	0.00287738	0.00160846	0.164985	0.0138679
cardiac muscle contraction	biological_process	14.27	6.44	0.00183447	0.00345052	0.00161605	0.227964	0.0138434
protein transporter activity	molecular_function	22.49	9.03	0.00289134	0.00483842	0.00194708	0.25802	0.0138433
negative regulation of protein kinase activity	biological_process	22.34	8.15	0.00287199	0.00436695	0.00149496	0.362304	0.0135487
peptide binding	molecular_function	26.43	9.98	0.00339777	0.00534671	0.00194895	0.223177	0.0132857
growth factor binding	molecular_function	11.75	6.17	0.00151056	0.00330571	0.00179515	0.137446	0.0131402
GDP binding	molecular_function	17.11	7.58	0.00219962	0.00406114	0.00186152	0.184822	0.0129769
PML body	cellular_component	27.05	9.5	0.00347742	0.00508997	0.00161255	0.302675	0.0128734
negative regulation of canonical Wnt receptor signaling pathway	biological_process	34.04	11.6	0.0043762	0.00621456	0.00183836	0.331347	0.0127178
cell communication	biological_process	35.72	11.91	0.00459201	0.00638118	0.00178917	0.336193	0.0125518
positive regulation of cell growth	biological_process	22.95	9.44	0.00295042	0.00505745	0.00210704	0.174547	0.0118488
liver development	biological_process	21.17	8.42	0.00272161	0.0045115	0.00178989	0.243847	0.0117965
protein homodimerization activity	molecular_function	267.35	69.24	0.0343702	0.037099	0.00272887	0.550832	0.0115449
G1/S transition of mitotic cell cycle	biological_process	26.34	9.22	0.00338625	0.00493921	0.00155297	0.301725	0.011422
focal adhesion	cellular_component	48.54	15.33	0.00624015	0.00821337	0.00197322	0.339526	0.0113841
positive regulation of I-kappaB kinase/NF-kappaB cascade	biological_process	47.39	15.33	0.00609246	0.00821445	0.00212199	0.33544	0.0112656
single-stranded DNA binding	molecular_function	18.99	7.7	0.00244134	0.0041253	0.00168396	0.230673	0.0111448
microtubule	cellular_component	112.06	31.55	0.0144062	0.0169043	0.00249809	0.401278	0.0110034
Notch signaling pathway	biological_process	29.57	10.53	0.00380142	0.00564185	0.00184043	0.273769	0.0108752
autophagy	biological_process	26.33	10.29	0.00338502	0.00551315	0.00212813	0.2108	0.0105958
structural molecule activity	molecular_function	38.14	13.2	0.00490323	0.00707211	0.00216888	0.281157	0.0105155
intracellular protein kinase cascade	biological_process	33.17	11.75	0.00426432	0.00629507	0.00203076	0.249293	0.0103069
regulation of cell adhesion	biological_process	14.43	5.66	0.00185504	0.00303283	0.00117779	0.36874	0.0102904
positive regulation of proteolysis	biological_process	9.48	5.07	0.00121868	0.00271612	0.00149744	0.165565	0.010192
response to wounding	biological_process	12.96	5.31	0.00166612	0.00284514	0.00117902	0.350775	0.0100036
positive regulation of apoptotic process	biological_process	122.67	33.74	0.0157704	0.0180784	0.00230797	0.478947	0.00998988
nervous system development	biological_process	112.99	31.07	0.0145259	0.016648	0.00212207	0.518562	0.00983763
transcription corepressor activity	molecular_function	41.87	14.06	0.00538275	0.00753193	0.00214918	0.308074	0.0098338
actin cytoskeleton reorganization	biological_process	16.52	6.46	0.0021238	0.00346151	0.00133771	0.301772	0.00968993
platelet-derived growth factor receptor signaling pathway	biological_process	12.55	5.67	0.00161342	0.00303856	0.00142514	0.238291	0.00962518
ubiquitin-dependent protein catabolic process	biological_process	54.17	17.19	0.00696383	0.00920991	0.00224608	0.35763	0.0095543
negative regulation of transforming growth factor beta receptor signaling pathway	biological_process	11.42	5.66	0.00146806	0.00303309	0.00156503	0.149712	0.00934898
calmodulin binding	molecular_function	58.25	18.15	0.00748855	0.00972373	0.00223518	0.372966	0.00930633
nuclear membrane	cellular_component	34.73	12.08	0.00446485	0.00647247	0.00200762	0.269517	0.00920805
cell-matrix adhesion	biological_process	25.98	9.16	0.00333998	0.00490864	0.00156866	0.388895	0.00917744
transcriptional repressor complex	cellular_component	15.57	6.97	0.00200165	0.0037336	0.00173195	0.18586	0.00894056
transcription cofactor activity	molecular_function	13.89	6.14	0.00178573	0.00328959	0.00150386	0.238626	0.00889662
Rho guanyl-nucleotide exchange factor activity	molecular_function	22.67	8.39	0.0029144	0.0044956	0.0015812	0.35094	0.00867833
sequence-specific DNA binding transcription factor activity	molecular_function	274.74	69.41	0.0353201	0.0371887	0.00186855	0.629835	0.00852945
ATP catabolic process	biological_process	39.51	13.21	0.0050793	0.00707604	0.00199674	0.2912	0.00840677
somitogenesis	biological_process	14.78	5.82	0.00190008	0.00311797	0.0012179	0.390689	0.00839555
cell death	biological_process	22.06	8.38	0.00283599	0.00449001	0.00165402	0.257411	0.00837717
positive regulation of smooth muscle cell proliferation	biological_process	22.64	8.71	0.00291055	0.00466666	0.00175611	0.266855	0.00837515
SMAD binding	molecular_function	13	6.2	0.00167127	0.00332151	0.00165024	0.166784	0.00822707
response to ionizing radiation	biological_process	13.19	5.25	0.00169568	0.00281309	0.0011174	0.351024	0.00813434
cellular response to insulin stimulus	biological_process	15	6.75	0.00192837	0.00361677	0.00168839	0.185768	0.00806935
protein self-association	molecular_function	15.16	6.53	0.00194897	0.00349817	0.00154921	0.253913	0.00800571
RNA polymerase II transcription cofactor activity	molecular_function	12.37	5.01	0.00159034	0.00268435	0.00109401	0.350617	0.00786591
glucose homeostasis	biological_process	28.04	9.59	0.00360481	0.00513775	0.00153294	0.387819	0.00782267
inner ear development	biological_process	22.1	7.32	0.00284114	0.0039217	0.00108055	0.482293	0.00777008
axonogenesis	biological_process	35.98	11.74	0.00462554	0.00628895	0.00166341	0.353386	0.00759765
phosphatidylinositol binding	molecular_function	33.1	10.83	0.00425513	0.00580198	0.00154685	0.35684	0.00736966
positive regulation of cell adhesion	biological_process	13.26	5.43	0.00170468	0.0029093	0.00120462	0.349472	0.00730398
negative regulation of cell migration	biological_process	31.61	10.37	0.00406371	0.00555517	0.00149147	0.420762	0.00710801
cysteine-type peptidase activity	molecular_function	49.43	14.81	0.00635461	0.00793388	0.00157927	0.429543	0.00708539
positive regulation of cell proliferation	biological_process	160.09	40.58	0.0205808	0.0217408	0.00115991	0.653331	0.00705978
membrane raft	cellular_component	82.52	23.18	0.0106087	0.0124195	0.00181089	0.532036	0.00702692
actin filament binding	molecular_function	31.27	10.25	0.00402003	0.00549155	0.00147152	0.424508	0.0070094
negative regulation of sequence-specific DNA binding transcription factor activity	biological_process	22.29	8.47	0.00286561	0.00453807	0.00167246	0.267755	0.00699255
signalosome	cellular_component	15.54	5.92	0.00199774	0.0031721	0.00117435	0.381921	0.006975
protein tyrosine kinase activity	molecular_function	58.8	16.69	0.0075592	0.0089422	0.001383	0.560331	0.00675031
lipid metabolic process	biological_process	166.08	42.21	0.021351	0.0226157	0.00126465	0.686458	0.00658911
angiogenesis	biological_process	80.67	22.12	0.0103707	0.0118514	0.00148065	0.534227	0.00657355
carbohydrate transport	biological_process	17.55	6.56	0.0022562	0.00351502	0.00125882	0.414602	0.00644577
response to hypoxia	biological_process	40.98	13.07	0.00526829	0.00700256	0.00173427	0.393036	0.00617495
nucleolus	cellular_component	185.86	45.35	0.0238937	0.024297	0.000403264	0.736264	0.00616822
p53 binding	molecular_function	18.05	7.05	0.00232049	0.00377743	0.00145694	0.314619	0.00610049
multicellular organism growth	biological_process	31	9.94	0.0039853	0.00532565	0.00134034	0.4273	0.00603559
lipid binding	molecular_function	79.29	21.74	0.0101932	0.0116477	0.00145445	0.531222	0.00595969
positive regulation of gene expression	biological_process	75.75	21.03	0.00973826	0.0112673	0.00152901	0.596147	0.00592748
catalytic step 2 spliceosome	cellular_component	30.86	10.04	0.00396728	0.00537838	0.0014111	0.428198	0.00572414
positive regulation of proteasomal ubiquitin-dependent protein catabolic process	biological_process	16.13	6.34	0.00207362	0.00339609	0.00132247	0.301641	0.0056975
protein localization	biological_process	30.23	9.72	0.00388631	0.00520733	0.00132102	0.427652	0.00567318
neuronal cell body	cellular_component	154.35	37.49	0.0198429	0.0200864	0.00024353	0.714708	0.00540384
negative regulation of cell death	biological_process	21.56	7.23	0.00277175	0.00387384	0.00110209	0.470772	0.00530052
regulation of sequence-specific DNA binding transcription factor activity	biological_process	12.99	5.27	0.00166998	0.00282308	0.00115309	0.369139	0.00529321
glycoprotein binding	molecular_function	24.27	8.42	0.00312011	0.00451112	0.00139101	0.362271	0.00523472
nuclear body	cellular_component	12.15	5.35	0.001562	0.0028662	0.0013042	0.326948	0.00510608
carbohydrate metabolic process	biological_process	82.56	21.22	0.0106137	0.0113688	0.00075512	0.66442	0.00506789
glycolysis	biological_process	14.25	5.39	0.00183196	0.00288747	0.00105551	0.393394	0.0049896
cell redox homeostasis	biological_process	20.78	7.35	0.0026715	0.00393773	0.00126623	0.395737	0.00498449
regulation of cell cycle	biological_process	44.12	12.95	0.00567203	0.00693886	0.00126683	0.505042	0.00497872
positive regulation of protein catabolic process	biological_process	14.61	5.79	0.0018782	0.00310237	0.00122417	0.371266	0.00491895
cytokinesis	biological_process	24.4	8.29	0.00313688	0.0044418	0.00130492	0.377824	0.00489039
amino acid transmembrane transport	biological_process	14.67	5.42	0.00188598	0.0029038	0.00101781	0.394276	0.00482792
mitochondrial intermembrane space	cellular_component	12.08	5	0.00155295	0.00267887	0.00112592	0.350842	0.00467339
double-stranded RNA binding	molecular_function	17.21	5.78	0.00221245	0.00309676	0.000884304	0.443894	0.00462599
intracellular signal transduction	biological_process	110.91	27.91	0.0142585	0.0149543	0.000695817	0.744109	0.00457999
positive regulation of phosphorylation	biological_process	14.75	5.3	0.00189623	0.00283957	0.000943339	0.413696	0.00450725
integrin binding	molecular_function	32.29	10.32	0.00415115	0.00552966	0.00137851	0.43833	0.00449497
ruffle	cellular_component	34.14	10.3	0.00438895	0.00551901	0.00113006	0.567234	0.00443368
positive regulation of protein kinase B signaling cascade	biological_process	28.98	8.93	0.00372561	0.00478422	0.00105861	0.535077	0.00440082
stem cell maintenance	biological_process	17.94	6.02	0.0023063	0.00322481	0.000918506	0.507084	0.00439516
vasculogenesis	biological_process	26.83	8.44	0.00344919	0.00452232	0.00107314	0.461712	0.00437259
forebrain development	biological_process	23.42	7.8	0.00301085	0.00417876	0.00116791	0.471733	0.00436285
Rab GTPase activator activity	molecular_function	18.54	6.68	0.00238348	0.00357866	0.00119517	0.442625	0.00432348
microtubule binding	molecular_function	57.36	15.37	0.00737419	0.00823533	0.000861134	0.655684	0.00429665
Rho protein signal transduction	biological_process	15.2	5.53	0.00195408	0.00296278	0.0010087	0.392748	0.00426335
protein homooligomerization	biological_process	70.12	18.49	0.00901457	0.0099064	0.000891834	0.686377	0.00420859
positive regulation of cell migration	biological_process	59.76	14.71	0.00768262	0.0078805	0.000197876	0.665327	0.0042081
glucose metabolic process	biological_process	21.36	7.03	0.00274597	0.00376631	0.00102034	0.482507	0.00401705
axon	cellular_component	97.77	25.28	0.0125691	0.0135441	0.00097505	0.731095	0.00401653
response to unfolded protein	biological_process	16.83	5.72	0.0021636	0.00306513	0.000901533	0.442666	0.00397545
regulation of cell proliferation	biological_process	63.55	15.8	0.00816988	0.00846613	0.00029625	0.678309	0.00392109
isomerase activity	molecular_function	55.01	14.69	0.007072	0.0078703	0.000798302	0.65174	0.00388624
neuron projection morphogenesis	biological_process	21.87	6.87	0.00281152	0.00368076	0.000869238	0.490381	0.00387757
ubiquitin ligase complex	cellular_component	13.96	5.34	0.00179465	0.00286141	0.00106677	0.39173	0.00386833
cell-cell adhesion	biological_process	39.6	11.55	0.00509097	0.00618864	0.00109767	0.589469	0.00383499
NAD binding	molecular_function	20.63	6.57	0.00265205	0.0035201	0.000868052	0.610129	0.00381246
negative regulation of translation	biological_process	17.89	5.84	0.00229989	0.00312785	0.000827961	0.442607	0.00380076
mitochondrial matrix	cellular_component	24.21	7.56	0.00311243	0.00405104	0.000938611	0.5	0.00374736
lipid transport	biological_process	24.77	7.47	0.00318435	0.00400248	0.000818127	0.527217	0.00373803
nuclear speck	cellular_component	32.71	9.89	0.00420511	0.00529899	0.00109388	0.552167	0.00373539
double-stranded DNA binding	molecular_function	49.19	12.19	0.0063238	0.00653082	0.000207019	0.742415	0.00372947
regulation of cell migration	biological_process	19.88	6.59	0.00255574	0.00353056	0.000974825	0.462298	0.0037198
cell adhesion molecule binding	molecular_function	14.55	5.07	0.00187054	0.00271627	0.000845735	0.413178	0.00367118
external side of plasma membrane	cellular_component	100.57	24.63	0.0129292	0.0131968	0.0002676	0.817621	0.0036643
regulation of cell shape	biological_process	47.4	11.74	0.00609364	0.00628951	0.00019587	0.734575	0.00365652
muscle organ development	biological_process	20.91	6.87	0.0026881	0.0036809	0.000992794	0.470144	0.00364609
neural tube closure	biological_process	30.52	8.99	0.00392363	0.00481609	0.000892463	0.554336	0.00357144
peptidyl-tyrosine dephosphorylation	biological_process	19.55	6.41	0.00251328	0.00343403	0.000920755	0.541093	0.00352649
regulation of Rab GTPase activity	biological_process	17.54	5.95	0.00225492	0.00318776	0.000932837	0.442891	0.00348668
positive regulation of cell-substrate adhesion	biological_process	15.41	5.18	0.00198109	0.00277573	0.000794638	0.569351	0.00346994
postsynaptic membrane	cellular_component	72.12	18.39	0.00927165	0.00985289	0.000581243	0.780067	0.00345206
regulation of protein phosphorylation	biological_process	15.65	5.39	0.00201194	0.00288751	0.000875568	0.427488	0.00339595
chromatin	cellular_component	32.99	9.57	0.00424118	0.00512799	0.00088681	0.574487	0.00339144
positive regulation of angiogenesis	biological_process	37.63	9.86	0.00483764	0.00528224	0.000444594	0.697067	0.00339113
termination of G-protein coupled receptor signaling pathway	biological_process	15.82	5.4	0.00203376	0.00289325	0.000859495	0.567692	0.00338527
cell cycle arrest	biological_process	36.48	10.16	0.00468977	0.0054431	0.000753333	0.704457	0.00337643
negative regulation of gene expression	biological_process	41.68	10.72	0.00535826	0.00574196	0.000383705	0.719178	0.00336597
spindle pole	cellular_component	20.74	6.6	0.00266633	0.00353665	0.000870323	0.482526	0.00335578
heart looping	biological_process	19.44	6.26	0.00249919	0.00335378	0.000854588	0.610363	0.00334079
ER-associated protein catabolic process	biological_process	16.3	5.26	0.00209547	0.0028183	0.000722821	0.568103	0.00329163
cell periphery	cellular_component	16.62	5.13	0.00213657	0.00274828	0.000611702	0.561152	0.00327362
helicase activity	molecular_function	59.19	15.64	0.00760934	0.00837959	0.000770255	0.766602	0.00320382
methylation	biological_process	60.48	14.88	0.00777527	0.00797265	0.000197377	0.769344	0.00318148
heart morphogenesis	biological_process	17.49	5.1	0.00224845	0.00273208	0.000483624	0.590823	0.00317731
nuclear pore	cellular_component	19.51	5.97	0.00250818	0.00319817	0.000689994	0.610576	0.00315806
neuron apoptotic process	biological_process	13.71	5.03	0.00176261	0.00269474	0.000932134	0.405822	0.00315027
pyridoxal phosphate binding	molecular_function	18.53	6.29	0.00238214	0.00336952	0.000987383	0.452581	0.00313068
post-embryonic development	biological_process	36.2	9.79	0.00465384	0.00524508	0.000591231	0.702874	0.00312397
embryo development	biological_process	41.08	11.32	0.00528117	0.00606439	0.000783217	0.720937	0.00311641
cell body	cellular_component	24.32	6.38	0.00312654	0.00341856	0.000292019	0.64239	0.00308652
negative regulation of protein phosphorylation	biological_process	16.49	5.67	0.0021199	0.00303811	0.000918205	0.441801	0.00304484
positive regulation of osteoblast differentiation	biological_process	26.23	7.5	0.00337207	0.00401799	0.000645919	0.667189	0.00300023
ATPase activity	molecular_function	48.77	12.6	0.0062697	0.00674983	0.00048013	0.743842	0.00299781
cell morphogenesis	biological_process	27.86	7.73	0.00358167	0.00414147	0.000559796	0.672139	0.00299317
negative regulation of cell growth	biological_process	53.73	13.15	0.00690735	0.0070451	0.000137745	0.755244	0.00298624
protein dimerization activity	molecular_function	60.38	14.74	0.00776241	0.00789727	0.000134863	0.771266	0.0029595
receptor activity	molecular_function	73.03	18.49	0.00938868	0.00990739	0.000518707	0.791706	0.00295087
positive regulation of MAPK cascade	biological_process	39.32	9.77	0.00505491	0.00523455	0.000179639	0.719933	0.00293537
protein oligomerization	biological_process	22.57	6.83	0.00290154	0.00365923	0.000757693	0.641922	0.00289785
nuclear envelope	cellular_component	37.46	9.68	0.00481583	0.00518634	0.00037051	0.715746	0.00287421
negative regulation of cysteine-type endopeptidase activity involved in apoptotic process	biological_process	26.43	7.28	0.00339777	0.00390013	0.000502359	0.663742	0.00286138
cytokine-mediated signaling pathway	biological_process	35.39	9.85	0.0045496	0.0052776	0.000727995	0.707456	0.00281426
growth cone	cellular_component	39.47	10.24	0.00507418	0.00548646	0.000412279	0.719305	0.00278833
negative regulation of NF-kappaB transcription factor activity	biological_process	22.08	5.7	0.0028386	0.00305405	0.000215451	0.727988	0.00276006
transforming growth factor beta receptor signaling pathway	biological_process	25.57	6.86	0.00328721	0.00367613	0.000388924	0.662718	0.00267008
BMP signaling pathway	biological_process	18.54	5.73	0.00238347	0.00307032	0.000686855	0.611065	0.00266709
response to UV	biological_process	15.95	5.22	0.00205049	0.00279656	0.000746068	0.514578	0.00264995
non-membrane spanning protein tyrosine kinase activity	molecular_function	19.95	5.97	0.00256471	0.00319835	0.000633642	0.618868	0.00260995
skeletal muscle cell differentiation	biological_process	19.94	5.6	0.00256346	0.00300039	0.000436931	0.61452	0.00260162
elevation of cytosolic calcium ion concentration	biological_process	48.14	11.8	0.00618881	0.00632256	0.000133756	0.866785	0.00259634
positive regulation of protein ubiquitination	biological_process	20.38	6.03	0.00262007	0.00323112	0.000611049	0.630531	0.00259267
cholesterol homeostasis	biological_process	17.62	5.03	0.00226519	0.00269538	0.000430194	0.600131	0.00258062
iron ion homeostasis	biological_process	16.19	5.19	0.00208137	0.00278043	0.000699062	0.581573	0.00254746
negative regulation of neuron differentiation	biological_process	21.83	5.96	0.00280638	0.00319346	0.000387086	0.645022	0.00254134
symporter activity	molecular_function	43.44	10.6	0.00558456	0.00567874	9.42e-05	0.86038	0.00253411
skeletal muscle tissue development	biological_process	18.08	5.65	0.0023243	0.00302657	0.000702271	0.609318	0.00250878
microtubule-based movement	biological_process	22.76	6.61	0.00292597	0.00354161	0.000615645	0.649054	0.00248175
intermediate filament cytoskeleton	cellular_component	19.77	5.02	0.00254166	0.00269017	0.000148509	0.782953	0.00248077
transmembrane receptor protein tyrosine kinase activity	molecular_function	26.54	6.42	0.00341194	0.00343978	2.78e-05	0.820973	0.00247124
peptidyl-tyrosine phosphorylation	biological_process	29.01	7.29	0.00372942	0.0039059	0.000176483	0.753317	0.00244325
pattern specification process	biological_process	30.63	7.56	0.00393775	0.00405007	0.00011232	0.834594	0.00242089
positive regulation of peptidyl-tyrosine phosphorylation	biological_process	31.89	8.6	0.00409976	0.00460756	0.000507804	0.695019	0.00240321
4 iron, 4 sulfur cluster binding	molecular_function	21.34	6.38	0.00274343	0.0034184	0.00067497	0.631319	0.00239622
MAPK cascade	biological_process	32.57	8.49	0.00418714	0.00454866	0.000361519	0.699538	0.0023837
amino acid transport	biological_process	17.64	5.37	0.0022678	0.00287739	0.000609589	0.598343	0.00237985
embryonic digit morphogenesis	biological_process	21.73	5.95	0.00279356	0.00318798	0.000394424	0.804337	0.00236844
protein processing	biological_process	21.05	5.29	0.00270625	0.00283468	0.000128429	0.7882	0.0023222
synaptic transmission	biological_process	32.32	8.82	0.00415501	0.00472573	0.000570719	0.697363	0.00230856
lysosomal membrane	cellular_component	22.66	5.45	0.00291314	0.00291968	6.54e-06	0.808453	0.00229973
patterning of blood vessels	biological_process	18.48	5.46	0.00237578	0.00292596	0.000550176	0.788058	0.00229348
ubiquitin thiolesterase activity	molecular_function	25.22	6.79	0.00324216	0.00363723	0.000395071	0.820576	0.00226922
phosphotransferase activity, alcohol group as acceptor	molecular_function	22.16	6.57	0.00284885	0.00351942	0.00067057	0.642702	0.00222614
translational initiation	biological_process	23.53	5.8	0.00302498	0.00310778	8.28e-05	0.808512	0.00220044
dendritic shaft	cellular_component	17.79	5.41	0.00228704	0.00289883	0.000611791	0.69692	0.00217672
translation initiation factor activity	molecular_function	22.53	5.8	0.00289643	0.00310778	0.000211353	0.804329	0.00217168
phosphoprotein binding	molecular_function	21.99	5.69	0.00282701	0.00304851	0.000221498	0.792291	0.00216737
fat cell differentiation	biological_process	20.09	5.45	0.00258275	0.00292025	0.000337509	0.791597	0.00214452
steroid metabolic process	biological_process	31.44	8.32	0.00404188	0.00445789	0.000416017	0.831091	0.0021005
lung alveolus development	biological_process	17.75	5.05	0.00228197	0.00270502	0.000423051	0.782921	0.00209755
positive regulation of phosphatidylinositol 3-kinase cascade	biological_process	20.79	5.71	0.00267269	0.00305979	0.000387095	0.800855	0.00199591
positive regulation of GTPase activity	biological_process	18.73	5.05	0.00240789	0.0027057	0.000297804	0.790966	0.00196667
odontogenesis of dentin-containing tooth	biological_process	23.77	5.71	0.00305588	0.00305977	3.88e-06	0.815515	0.00193893
positive regulation of fibroblast proliferation	biological_process	20.5	5.91	0.00263548	0.00316614	0.000530657	0.626388	0.00193773
axon terminus	cellular_component	19.5	5.09	0.00250685	0.00272724	0.000220391	0.790421	0.00191396
response to virus	biological_process	25.38	6.26	0.00326277	0.0033538	9.1e-05	0.821617	0.00185942
nucleobase-containing compound metabolic process	biological_process	20.36	5.5	0.00261744	0.0029471	0.000329653	0.798357	0.0015374
calcium-dependent protein binding	molecular_function	23.24	5.73	0.00298764	0.00306967	8.2e-05	0.815194	0.00152711
cytokine receptor activity	molecular_function	20.26	5.15	0.00260458	0.00275911	0.00015453	0.804565	0.00139945
hair follicle development	biological_process	18.83	5.02	0.00242076	0.0026892	0.000268447	0.797581	0.00139451

## Sheet: muscle
Gene Ontology categories for transcripts with CELF1 binding in 3' UTRs (CLIP from muscle)
#Category	Group	No. in control genes (out of 8036)	No. in CLIPped genes (out of 2000)	Frequency in control genes	Frequency in CLIPped genes	Delta Frequency	Median p value	Bayes Factor
nucleus	cellular_component	2145.8	751.01	0.267024	0.375405	0.108381	5.69e-10	4.04e+304
protein binding	molecular_function	1497.75	510.02	0.186381	0.254943	0.0685621	5.49e-10	5.26e+158
regulation of transcription, DNA-dependent	biological_process	713.12	286.98	0.0887407	0.143449	0.054708	3.81e-10	4.07e+156
cytoplasm	cellular_component	2315.75	730.98	0.288173	0.365399	0.0772263	6.25e-10	4.84e+151
transcription, DNA-dependent	biological_process	689.07	273.76	0.0857479	0.136842	0.0510937	4.14e-10	6.25e+119
positive regulation of transcription from RNA polymerase II promoter	biological_process	272.91	120.08	0.0339608	0.0600224	0.0260616	3.86e-07	2.83e+59
positive regulation of transcription, DNA-dependent	biological_process	191.88	92.02	0.0238775	0.0459961	0.0221186	6.01e-07	2.08e+54
sequence-specific DNA binding transcription factor activity	molecular_function	254.58	105.95	0.03168	0.0529596	0.0212796	9.41e-06	4.96e+37
DNA binding	molecular_function	657.25	230.16	0.0817883	0.115044	0.0332558	5.69e-06	2.64e+35
ubiquitin-protein ligase activity	molecular_function	83.33	54.02	0.0103697	0.0270046	0.0166349	1.83e-07	1.58e+35
ligase activity	molecular_function	151.12	73.88	0.0188055	0.0369334	0.0181278	6.83e-06	5.6e+33
I band	cellular_component	4.01	8.07	0.000499035	0.0040349	0.00353586	0.000547774	1.78e+32
protein ubiquitination	biological_process	59.98	39.04	0.00746397	0.0195154	0.0120515	8.11e-06	4.1e+30
zinc ion binding	molecular_function	409.48	153.18	0.0509559	0.0765692	0.0256132	1.32e-05	1.36e+28
cytosol	cellular_component	379.25	145.71	0.0471939	0.0728354	0.0256416	1.03e-05	4.25e+27
sequence-specific DNA binding	molecular_function	178.61	78.03	0.0222262	0.0390028	0.0167766	6.04e-05	7.02e+25
RNA binding	molecular_function	238.76	98.31	0.0297113	0.0491417	0.0194304	3.8e-05	1.38e+24
transcription factor binding	molecular_function	103.1	52.04	0.0128298	0.026013	0.0131832	6.21e-05	3.8e+23
ubiquitin protein ligase binding	molecular_function	53.01	33.99	0.00659654	0.0169919	0.0103953	3.28e-05	3.76e+22
protein kinase binding	molecular_function	134.07	61.03	0.0166838	0.030506	0.0138223	0.000215361	1.72e+22
dephosphorylation	biological_process	53.47	33.85	0.00665384	0.0169227	0.0102689	4.67e-05	1.06e+22
negative regulation of transcription from RNA polymerase II promoter	biological_process	212.19	88.86	0.0264049	0.0444164	0.0180115	6.35e-05	8.26e+21
sarcoplasmic reticulum	cellular_component	13.11	15.59	0.00163145	0.00779395	0.0061625	5.09e-05	5.65e+21
transcription regulatory region DNA binding	molecular_function	66.25	32.84	0.0082442	0.0164156	0.00817136	0.00217718	1.01e+21
protein dephosphorylation	biological_process	47.54	31.26	0.00591584	0.0156262	0.00971036	6.13e-05	7.7e+19
negative regulation of apoptotic process	biological_process	186.19	78.14	0.0231694	0.0390589	0.0158895	0.000170565	3.47e+18
transcription factor complex	cellular_component	92.37	44.54	0.0114946	0.0222632	0.0107686	0.000417545	1.37e+18
protein complex binding	molecular_function	99.32	46.12	0.0123594	0.0230551	0.0106957	0.000736454	4.81e+16
protein complex	cellular_component	183.48	73.56	0.0228322	0.0367685	0.0139363	0.000634704	1.33e+16
negative regulation of transcription, DNA-dependent	biological_process	174.82	71.36	0.0217547	0.0356683	0.0139136	0.00055459	2110000000000000
protein serine/threonine kinase activity	molecular_function	164.01	66.79	0.0204095	0.0333883	0.0129788	0.000937943	1960000000000000
peptidyl-tyrosine dephosphorylation	biological_process	16.66	13.68	0.00207317	0.00683818	0.00476501	0.00131528	1570000000000000
chromatin binding	molecular_function	126.81	55.67	0.0157801	0.0278248	0.0120447	0.000576206	1320000000000000
phosphoprotein phosphatase activity	molecular_function	54.33	32.36	0.00676078	0.0161768	0.00941599	0.000154454	1000000000000000
intracellular protein transport	biological_process	67.06	34.58	0.00834493	0.0172869	0.00894194	0.000980898	66700000000000
nucleotide binding	molecular_function	835.6	258.66	0.103982	0.129297	0.0253147	0.00179746	20800000000000
chromatin modification	biological_process	92.35	46.46	0.011492	0.0232239	0.0117319	0.000149923	12800000000000
vesicle-mediated transport	biological_process	70.19	36.72	0.00873447	0.0183554	0.00962089	0.000543607	10100000000000
protein serine/threonine phosphatase activity	molecular_function	8.2	11.62	0.00102038	0.00580896	0.00478857	0.000193388	9730000000000
transport	biological_process	670.08	212.27	0.0833847	0.106106	0.0227215	0.00138397	5330000000000
face morphogenesis	biological_process	7.02	9.32	0.000873551	0.00465871	0.00378516	0.00075421	1980000000000
metal ion binding	molecular_function	1372.77	391.94	0.170828	0.195922	0.0250947	0.00849199	479448000000
M band	cellular_component	2.51	5.46	0.000312363	0.00272964	0.00241727	0.00442233	271888000000
regulation of cell proliferation	biological_process	52.86	27.76	0.00657781	0.013876	0.00729822	0.0026044	156046000000
protein transport	biological_process	228.23	90.42	0.0284011	0.0451979	0.0167968	0.000196699	65816133993
proteasomal ubiquitin-dependent protein catabolic process	biological_process	18.03	17.53	0.00224367	0.00876315	0.00651948	8.44e-05	35735871811
neuron projection	cellular_component	107.62	46.28	0.0133923	0.0231343	0.00974199	0.00248554	34013312549
cyclin binding	molecular_function	6	6.39	0.000746644	0.00319457	0.00244793	0.0124775	21395669314
unfolded protein binding	molecular_function	13.6	13.1	0.00169226	0.00654789	0.00485563	0.000625615	3583935303
magnesium ion binding	molecular_function	70.27	27.73	0.00874447	0.0138614	0.00511695	0.0475554	3136024737
Hsp70 protein binding	molecular_function	3.63	5.38	0.000451704	0.00268912	0.00223742	0.0102925	1078031371
transcription coactivator activity	molecular_function	55	27.58	0.0068442	0.0137863	0.0069421	0.00353479	6.26052e+08
heat shock protein binding	molecular_function	6.22	9.99	0.000774056	0.00499361	0.00421955	0.000242921	5.22981e+08
Golgi apparatus	cellular_component	443.84	141.82	0.0552317	0.0708878	0.0156561	0.00888203	4.46839e+08
in utero embryonic development	biological_process	100.78	40.59	0.0125411	0.0202879	0.00774681	0.0134368	3.78196e+08
identical protein binding	molecular_function	171.19	63.89	0.0213028	0.0319391	0.0106363	0.00646402	2.73746e+08
phosphatase activity	molecular_function	42.89	25.67	0.00533725	0.0128323	0.00749502	0.000673454	2.04421e+08
regulation of transcription from RNA polymerase II promoter	biological_process	91.11	39.95	0.0113378	0.0199687	0.00863094	0.00294726	1.82611e+08
heart development	biological_process	64.82	32.02	0.0080662	0.0160058	0.0079396	0.00222926	1.69464e+08
RNA polymerase II distal enhancer sequence-specific DNA binding transcription factor activity	molecular_function	26.96	15.75	0.00335492	0.0078727	0.00451778	0.011581	6.27366e+07
histone deacetylase binding	molecular_function	25.17	15.07	0.00313218	0.00753386	0.00440167	0.0113444	3.39073e+07
coated pit	cellular_component	15.25	13.02	0.00189767	0.00650879	0.00461112	0.00146447	3.15315e+07
sarcolemma	cellular_component	24.65	17.98	0.00306746	0.00898678	0.00591932	0.00096318	1.50233e+07
protein heterodimerization activity	molecular_function	150.89	58.89	0.0187768	0.0294385	0.0106618	0.00333504	1.41242e+07
cytokinesis	biological_process	15.59	12.45	0.00194001	0.00622414	0.00428413	0.00425097	1.39728e+07
protein domain specific binding	molecular_function	96.53	39.96	0.0120122	0.0199744	0.00796217	0.00918698	1.17023e+07
protein polyubiquitination	biological_process	21.88	16.21	0.00272276	0.00810378	0.00538102	0.000864587	8.36332e+06
eating behavior	biological_process	8.07	5.17	0.00100424	0.00258442	0.00158017	0.152305	4.97238e+06
ubiquitin binding	molecular_function	13.8	10.26	0.00171726	0.00512883	0.00341158	0.0119867	3.89546e+06
RNA splicing	biological_process	72.18	35.39	0.00898239	0.0176896	0.00870722	0.00139432	3.03442e+06
ATP hydrolysis coupled proton transport	biological_process	5.9	6	0.000734124	0.00299951	0.00226538	0.019147	2.06999e+06
acid-amino acid ligase activity	molecular_function	13.13	10.55	0.00163393	0.00527377	0.00363985	0.00560831	1.46904e+06
enzyme binding	molecular_function	101.07	43.91	0.0125773	0.021949	0.0093717	0.00270053	1.39662e+06
regulation of heart contraction	biological_process	5.88	6.35	0.000731747	0.003174	0.00244225	0.0114181	1.27565e+06
ER to Golgi vesicle-mediated transport	biological_process	8.08	9.66	0.00100542	0.00482838	0.00382295	0.00144966	1.03428e+06
response to stress	biological_process	42.45	22.08	0.00528248	0.0110365	0.00575397	0.00654682	894969
cell cycle	biological_process	260.93	87.98	0.0324703	0.0439788	0.0115085	0.0130911	555062
filopodium	cellular_component	18.64	10.54	0.00231954	0.00526833	0.0029488	0.053669	413159
perinuclear region of cytoplasm	cellular_component	159.06	66.1	0.0197935	0.0330413	0.0132478	0.000801779	384856
protein K48-linked ubiquitination	biological_process	9.51	10.76	0.00118344	0.00537828	0.00419484	0.0013997	256869
embryonic placenta development	biological_process	7.55	9.66	0.000939527	0.00482894	0.00388941	0.000907143	218132
mRNA processing	biological_process	103.23	44.36	0.0128462	0.0221736	0.00932737	0.0036034	142105
Wnt receptor signaling pathway	biological_process	75.89	34.28	0.00944376	0.017137	0.00769325	0.00560093	115035
basolateral plasma membrane	cellular_component	49.89	23.93	0.00620828	0.0119631	0.0057548	0.012054	108955
nucleic acid binding	molecular_function	336.12	109.57	0.0418269	0.0547685	0.0129415	0.0155576	55073.4
SCF-dependent proteasomal ubiquitin-dependent protein catabolic process	biological_process	6.19	5.4	0.000770303	0.00269928	0.00192897	0.0376149	46680.2
actin cytoskeleton organization	biological_process	48.7	25.98	0.00606021	0.012987	0.00692682	0.00245446	30988.1
positive regulation of smooth muscle cell proliferation	biological_process	21.43	12.86	0.00266676	0.00642928	0.00376252	0.0170807	20282.2
endosome	cellular_component	162.98	64.06	0.0202812	0.0320208	0.0117396	0.00274394	15887.4
nuclear membrane	cellular_component	40.56	19.36	0.00504725	0.00967675	0.0046295	0.0240263	6603.48
positive regulation of DNA replication	biological_process	14.28	10.7	0.00177701	0.00534894	0.00357193	0.0106072	5571.46
DNA methylation	biological_process	5.66	5.03	0.000704338	0.00251421	0.00180987	0.048481	5186.56
peptidyl-serine phosphorylation	biological_process	22.19	16.79	0.00276139	0.00839332	0.00563194	0.00093041	2605.17
cytoskeleton	cellular_component	405.12	133.13	0.0504134	0.0665507	0.0161373	0.00520201	2597.31
T-tubule	cellular_component	17.1	11.09	0.00212796	0.00554365	0.00341569	0.0158934	2561.39
phosphorylation	biological_process	303.83	98.48	0.0378085	0.0492288	0.0114203	0.0216114	2412.21
ATP metabolic process	biological_process	9.7	6.74	0.00120702	0.00336976	0.00216273	0.0594765	1867.75
cellular protein localization	biological_process	15.52	12.02	0.00193135	0.00600803	0.00407668	0.00580735	1678.17
cell-cell adherens junction	cellular_component	13.53	10.28	0.00168365	0.00513807	0.00345443	0.0147979	1507.88
caveola	cellular_component	22.22	14.99	0.00276503	0.00749254	0.00472752	0.00423917	1398.66
steroid hormone receptor activity	molecular_function	17.27	10.15	0.00214907	0.00507317	0.0029241	0.0421221	1339.82
platelet-derived growth factor receptor signaling pathway	biological_process	8	9.89	0.000995526	0.00494338	0.00394785	0.00087814	1325.23
cytoskeletal protein binding	molecular_function	16.03	10.77	0.00199474	0.00538448	0.00338974	0.0156903	1210.04
phosphatidylinositol dephosphorylation	biological_process	4	5.82	0.000497763	0.00290884	0.00241108	0.0062892	908.501
mitochondrion	cellular_component	684.95	205.04	0.0852353	0.102494	0.0172584	0.0169083	611.105
muscle contraction	biological_process	8.34	8.73	0.00103785	0.00436481	0.00332696	0.00406625	594.349
NF-kappaB binding	molecular_function	11.13	6.74	0.00138499	0.00336903	0.00198405	0.0798781	543.25
cellular response to amino acid stimulus	biological_process	13.17	7.39	0.00163886	0.00369384	0.00205498	0.0826415	442.706
nucleoplasm	cellular_component	58.14	26.21	0.00723486	0.0131002	0.00586537	0.0133979	387.743
regulation of cell cycle	biological_process	42.36	18.5	0.0052713	0.00924831	0.00397702	0.0458558	334.037
double-stranded DNA binding	molecular_function	47.29	20.68	0.00588479	0.0103358	0.00445104	0.0445646	275.834
peptidyl-threonine phosphorylation	biological_process	9.12	8.5	0.0011349	0.00424869	0.00311378	0.00685924	152.217
transcription corepressor activity	molecular_function	43.01	21.75	0.00535209	0.0108723	0.00552021	0.00969263	133.189
organ morphogenesis	biological_process	40.29	17.55	0.00501371	0.008773	0.00375929	0.062397	129.133
protein tyrosine phosphatase activity	molecular_function	38.41	20.89	0.00477972	0.0104434	0.00566372	0.00565263	114.671
nuclear chromatin	cellular_component	38.5	17.72	0.00479093	0.00885771	0.00406678	0.0455515	114.428
endosome to lysosome transport	biological_process	5.54	7.43	0.000689395	0.00371425	0.00302485	0.00374219	108.693
blood vessel development	biological_process	24.05	13.32	0.00299278	0.00665911	0.00366632	0.025161	106.3
regulation of muscle contraction	biological_process	9.35	5.91	0.00116351	0.0029548	0.00179129	0.0959785	101.99
regulation of sequence-specific DNA binding transcription factor activity	biological_process	12.13	7.55	0.00150946	0.00377361	0.00226415	0.0523095	81.5489
kinase activity	molecular_function	303.54	98.44	0.0377724	0.0492091	0.0114367	0.022489	67.731
negative regulation of G1/S transition of mitotic cell cycle	biological_process	4.47	5.06	0.000556232	0.0025288	0.00197257	0.0309975	62.6494
Z disc	cellular_component	28.44	16.18	0.00353905	0.00808811	0.00454906	0.0116534	48.4501
tricarboxylic acid cycle	biological_process	7.24	6.6	0.000900963	0.00330042	0.00239945	0.0185035	46.6008
negative regulation of sequence-specific DNA binding transcription factor activity	biological_process	23.13	12.42	0.0028783	0.00620899	0.00333068	0.0423071	44.1853
sarcomere	cellular_component	8.01	5.85	0.000996747	0.00292411	0.00192736	0.0599622	41.1148
mRNA binding	molecular_function	19.6	11.54	0.00243904	0.00576883	0.00332979	0.0244618	34.8665
steroid hormone mediated signaling pathway	biological_process	18.81	10.15	0.00234072	0.00507317	0.00273245	0.0536044	32.341
protein localization to nucleus	biological_process	7.52	7.48	0.000935785	0.00373879	0.002803	0.00707019	29.1919
apoptotic process	biological_process	241.77	83.62	0.0300858	0.0417976	0.0117117	0.0108542	27.2793
hydrogen ion transmembrane transporter activity	molecular_function	5.56	5.25	0.000691883	0.0026246	0.00193271	0.0323868	26.328
mitochondrial outer membrane	cellular_component	42.18	22.03	0.0052489	0.0110125	0.00576357	0.00636912	23.5952
nuclear matrix	cellular_component	26.09	13.01	0.00324665	0.00650421	0.00325757	0.044573	22.7096
signalosome	cellular_component	11.65	8.58	0.00144964	0.00428897	0.00283934	0.0244001	19.97
nucleosome assembly	biological_process	16.95	9.87	0.00210928	0.004933	0.00282371	0.0489232	19.3585
intracellular membrane-bounded organelle	cellular_component	229.12	72.23	0.0285116	0.0361056	0.00759404	0.0785205	16.0581
SMAD binding	molecular_function	14.12	10.46	0.00175713	0.00522816	0.00347103	0.010956	13.8971
cardiac muscle contraction	biological_process	12.05	9.14	0.00149949	0.00457006	0.00307057	0.0233885	11.2722
histone binding	molecular_function	18.95	11.23	0.00235814	0.00561315	0.00325502	0.032095	9.76671
endoplasmic reticulum	cellular_component	457.11	135.16	0.056883	0.0675608	0.0106778	0.0826629	9.75544
RNA polymerase II core promoter proximal region sequence-specific DNA binding transcription factor activity involved in positive regulation of transcription	molecular_function	26.08	12.91	0.00324539	0.00645307	0.00320769	0.0476899	7.22784
actin cytoskeleton	cellular_component	67.09	26.62	0.00834868	0.0133065	0.00495782	0.0522446	6.99786
trans-Golgi network	cellular_component	42.9	20.53	0.00533854	0.0102628	0.00492423	0.0239578	6.54409
insulin receptor signaling pathway	biological_process	17.25	10.55	0.00214658	0.00527344	0.00312686	0.0481773	6.54221
pattern specification process	biological_process	24.06	11.99	0.00299405	0.00599281	0.00299876	0.0609039	6.02098
chromatin remodeling	biological_process	15.55	10.69	0.00193506	0.00534141	0.00340635	0.0130413	5.45685
protein C-terminus binding	molecular_function	73.54	32.85	0.00915145	0.0164202	0.00726876	0.00637333	5.32866
mammary gland development	biological_process	8.61	7.8	0.00107139	0.00389916	0.00282777	0.0107821	4.60197
transforming growth factor beta receptor signaling pathway	biological_process	26.85	13.52	0.00334124	0.00675919	0.00341795	0.0469917	4.3586
ubiquitin-dependent protein catabolic process	biological_process	54.53	24.09	0.00678573	0.0120414	0.00525564	0.0216977	3.71618
protein ubiquitination involved in ubiquitin-dependent protein catabolic process	biological_process	10.53	12.18	0.00131035	0.00608925	0.00477889	0.000264875	3.55878
endocytosis	biological_process	62.73	24.87	0.0078061	0.012432	0.00462587	0.0629067	3.13933
G-protein beta/gamma-subunit complex binding	molecular_function	7.59	5.63	0.000944514	0.00281417	0.00186966	0.056616	3.03985
outflow tract morphogenesis	biological_process	13.08	8.26	0.00162771	0.0041296	0.0025019	0.0512326	2.90279
Golgi membrane	cellular_component	38.97	18.49	0.00484941	0.00924169	0.00439228	0.0330663	2.71759
phosphatidylinositol binding	molecular_function	33.41	14.96	0.00415756	0.00747875	0.00332119	0.0680166	2.28528
protein kinase activity	molecular_function	237.3	75.2	0.0295297	0.0375922	0.00806248	0.0642313	2.26474
mitogen-activated protein kinase kinase kinase binding	molecular_function	4	5.68	0.000497763	0.0028385	0.00234074	0.00637431	2.0817
negative regulation of transforming growth factor beta receptor signaling pathway	biological_process	13.92	9.17	0.00173219	0.00458403	0.00285184	0.0278467	1.78444
protein phosphorylation	biological_process	273.88	87.34	0.0340817	0.0436617	0.00957996	0.0418819	1.60306
mRNA transport	biological_process	27.25	13.96	0.00339103	0.0069783	0.00358727	0.0375679	1.41759
nuclear speck	cellular_component	29.59	14.41	0.00368222	0.0072026	0.00352038	0.0403891	1.3022
mitosis	biological_process	105.97	38.57	0.013187	0.0192806	0.00609365	0.0442409	1.17028
negative regulation of neuron apoptotic process	biological_process	45.27	17.34	0.00563343	0.00866822	0.00303479	0.145362	1.11758
ion channel binding	molecular_function	26.42	11.61	0.00328773	0.00580323	0.00251549	0.119926	1.02874
transferase activity, transferring phosphorus-containing groups	molecular_function	233.09	75.7	0.0290058	0.0378418	0.00883595	0.0493829	0.998314
protein folding	biological_process	36.14	17.21	0.00449713	0.00860237	0.00410524	0.0348329	0.940669
post-embryonic development	biological_process	32.29	15.74	0.00401817	0.00786792	0.00384975	0.0309534	0.831654
autophagy	biological_process	27.72	14.45	0.00344948	0.007223	0.00377352	0.0289134	0.804573
U12-type spliceosomal complex	cellular_component	10.07	5.07	0.00125311	0.00253477	0.00128165	0.198655	0.742099
cell division	biological_process	149.88	52.9	0.0186512	0.0264443	0.00779312	0.032956	0.684665
protein complex assembly	biological_process	17.57	11.73	0.00218641	0.00586277	0.00367636	0.0129931	0.677641
regulation of growth	biological_process	26.86	13.41	0.00334246	0.00670307	0.00336061	0.0500061	0.612472
regulation of catalytic activity	biological_process	36.56	15.18	0.00454962	0.00758813	0.00303851	0.111814	0.553566
tissue development	biological_process	7.89	5.67	0.000981816	0.00283401	0.00185219	0.0714226	0.542942
regulation of neuron apoptotic process	biological_process	8.77	5.32	0.00109135	0.00265931	0.00156795	0.153507	0.51112
p53 binding	molecular_function	21.93	10.98	0.00272895	0.00548827	0.00275932	0.0766975	0.477357
lipid particle	cellular_component	18.47	9.98	0.00229843	0.00498865	0.00269022	0.0593759	0.471678
syntaxin binding	molecular_function	11.58	11.31	0.001441	0.00565247	0.00421147	0.00144598	0.444985
response to unfolded protein	biological_process	14.67	9.64	0.0018255	0.00481892	0.00299342	0.023095	0.438452
chromatin DNA binding	molecular_function	8	5.79	0.000995526	0.00289404	0.00189851	0.0436426	0.434183
protein stabilization	biological_process	22.29	13.07	0.00277374	0.00653235	0.00375861	0.0172009	0.424385
estrogen receptor binding	molecular_function	9.88	7.31	0.00122953	0.00365461	0.00242508	0.0374593	0.407595
adult locomotory behavior	biological_process	14.75	8.34	0.00183545	0.00416899	0.00233354	0.0635392	0.364705
costamere	cellular_component	2.74	5.05	0.00034097	0.00252366	0.00218269	0.00836251	0.358756
G1/S transition of mitotic cell cycle	biological_process	19.83	11.58	0.00246763	0.00578881	0.00332117	0.0322247	0.342174
ATP binding	molecular_function	649	183.22	0.0807617	0.0915872	0.0108255	0.111402	0.339339
RNA polymerase II repressing transcription factor binding	molecular_function	6.26	5.32	0.00077899	0.00265862	0.00187963	0.0380018	0.333233
positive regulation of mitotic cell cycle	biological_process	8.25	6.09	0.00102666	0.00304436	0.00201769	0.0443791	0.328842
anterior/posterior pattern specification	biological_process	39.74	16.58	0.00494525	0.00828728	0.00334203	0.0843687	0.324168
protein tyrosine/serine/threonine phosphatase activity	molecular_function	13.6	8.8	0.00169238	0.00439847	0.00270609	0.0332505	0.311845
intracellular receptor signaling pathway	biological_process	11.67	7.04	0.00145222	0.00351885	0.00206663	0.0748463	0.309561
negative regulation of translation	biological_process	13.03	9.76	0.00162147	0.00487805	0.00325658	0.0163111	0.301078
embryo development	biological_process	38.14	17.3	0.00474617	0.00864728	0.00390111	0.044243	0.285675
negative regulation of canonical Wnt receptor signaling pathway	biological_process	35.26	14.7	0.00438775	0.00734746	0.00295971	0.111893	0.281495
protein K63-linked ubiquitination	biological_process	7.06	6.07	0.000878574	0.00303487	0.0021563	0.0293175	0.278698
repressing transcription factor binding	molecular_function	7.46	5.3	0.000928313	0.00264889	0.00172058	0.0707161	0.277446
regulation of protein localization	biological_process	14.57	9.27	0.00181312	0.00463384	0.00282071	0.0294248	0.276829
midbody	cellular_component	31.02	15.39	0.00386012	0.00769429	0.00383417	0.0356655	0.265872
cytoplasmic stress granule	cellular_component	8.15	7.57	0.0010142	0.00378371	0.00276952	0.0109911	0.246967
GTP binding	molecular_function	151.57	48.72	0.0188615	0.0243545	0.00549304	0.127697	0.231852
protein monoubiquitination	biological_process	7.54	5.63	0.000938289	0.00281442	0.00187613	0.0434412	0.224723
histone-lysine N-methyltransferase activity	molecular_function	7.99	6.01	0.000994278	0.00300456	0.00201028	0.0433262	0.220837
activation of MAPKK activity	biological_process	12.08	7.52	0.00150326	0.00375862	0.00225537	0.0676802	0.218035
positive regulation of apoptotic process	biological_process	129.21	42.79	0.0160789	0.0213898	0.00531087	0.119293	0.196308
activation of JUN kinase activity	biological_process	9.59	6.69	0.0011934	0.00334418	0.00215078	0.0600571	0.18939
protein kinase C binding	molecular_function	21.44	10.63	0.00266798	0.0053123	0.00264432	0.0808396	0.174938
manganese ion binding	molecular_function	16.18	9.42	0.00201347	0.00470964	0.00269616	0.0486453	0.173341
late endosome	cellular_component	29.04	15.13	0.00361373	0.00756312	0.00394939	0.0244749	0.173002
skeletal muscle cell differentiation	biological_process	22.46	10.59	0.00279496	0.00529368	0.00249872	0.114845	0.171922
actin binding	molecular_function	130.03	42.1	0.016181	0.0210457	0.00486465	0.132068	0.164948
muscle organ development	biological_process	23.77	10.71	0.00295791	0.00535332	0.0023954	0.138637	0.162967
transferase activity	molecular_function	635.82	176.38	0.0791215	0.088169	0.00904756	0.171973	0.16223
cellular response to calcium ion	biological_process	5.66	6	0.000704344	0.00299922	0.00229488	0.011844	0.159419
lipid binding	molecular_function	78.61	29.01	0.00978213	0.0145004	0.00471827	0.0712906	0.15321
lactation	biological_process	7.55	5.54	0.00093952	0.00276925	0.00182972	0.0702083	0.146688
multicellular organism growth	biological_process	26.32	12.62	0.0032753	0.00630766	0.00303236	0.0648064	0.145443
Hsp90 protein binding	molecular_function	7	5.26	0.000871085	0.0026285	0.00175742	0.0703775	0.144657
ATPase binding	molecular_function	6.63	6.01	0.000825025	0.00300428	0.00217926	0.0291585	0.134366
odontogenesis of dentin-containing tooth	biological_process	18.78	8.59	0.00233701	0.00429373	0.00195671	0.157316	0.132898
heterochromatin	cellular_component	12.6	6.97	0.00156792	0.0034839	0.00191598	0.0945745	0.131302
microtubule-based movement	biological_process	16.99	8.69	0.00211415	0.00434434	0.00223019	0.0913245	0.127294
core promoter binding	molecular_function	8.57	5.4	0.00106644	0.00269932	0.00163288	0.124503	0.126149
R-SMAD binding	molecular_function	5	5.74	0.000622204	0.00286976	0.00224756	0.0117006	0.125822
negative regulation of epithelial cell proliferation	biological_process	19.48	10.14	0.00242411	0.00506865	0.00264454	0.0604703	0.124957
transcription initiation from RNA polymerase II promoter	biological_process	10.64	6.46	0.00132406	0.00322902	0.00190496	0.0947234	0.124269
cytoplasmic mRNA processing body	cellular_component	8.16	6.54	0.0010154	0.00326878	0.00225338	0.0270616	0.122215
transcription from RNA polymerase II promoter	biological_process	41.3	17.54	0.0051394	0.00876853	0.00362913	0.062146	0.120007
mRNA 3'-UTR binding	molecular_function	7.48	5.19	0.000930823	0.00259421	0.00166339	0.0724763	0.119622
early endosome	cellular_component	44.07	18.27	0.00548403	0.00913278	0.00364876	0.0921444	0.119128
ATP catabolic process	biological_process	44.09	16.62	0.00548658	0.00830708	0.0028205	0.155312	0.115788
protein homodimerization activity	molecular_function	258.79	76.84	0.0322041	0.0384083	0.00620424	0.161433	0.11133
cellular response to hydrogen peroxide	biological_process	5.31	6	0.000660764	0.00299855	0.00233779	0.018601	0.104454
protein autophosphorylation	biological_process	73.57	26.41	0.009155	0.0132023	0.00404732	0.12613	0.102916
proton transport	biological_process	22.62	9.87	0.00281482	0.00493387	0.00211905	0.165817	0.0994722
neuron apoptotic process	biological_process	10.77	7.57	0.00134024	0.00378364	0.0024434	0.0401762	0.0993138
embryonic cranial skeleton morphogenesis	biological_process	10	6.32	0.00124441	0.00315897	0.00191456	0.108005	0.092813
intercalated disc	cellular_component	14.62	8.28	0.00181934	0.0041388	0.00231946	0.0623549	0.091054
beta-catenin binding	molecular_function	28.28	12.46	0.00351915	0.00622831	0.00270916	0.105121	0.0900699
positive regulation of osteoblast differentiation	biological_process	24.15	10.31	0.00300525	0.00515383	0.00214858	0.192945	0.0898128
cell aging	biological_process	12.93	6.49	0.00160899	0.00324451	0.00163551	0.16507	0.0876716
peptide binding	molecular_function	27.77	12.22	0.00345569	0.00610878	0.0026531	0.106821	0.0875127
positive regulation of MAPK cascade	biological_process	38.56	14.64	0.00479846	0.00731644	0.00251797	0.172188	0.086972
phosphatidylinositol 3-kinase binding	molecular_function	10.62	6.14	0.00132156	0.00306827	0.00174671	0.125215	0.0866411
negative regulation of cell migration	biological_process	31.18	12.64	0.00388007	0.00631869	0.00243861	0.167791	0.0846252
brain development	biological_process	49.07	18.29	0.0061063	0.00914257	0.00303627	0.134457	0.0831686
cochlea morphogenesis	biological_process	8.22	5.08	0.00102288	0.00253938	0.00151651	0.153903	0.0807463
cellular response to drug	biological_process	7.75	5.35	0.000964445	0.00267425	0.00170981	0.096116	0.0786283
JAK-STAT cascade	biological_process	5	5.16	0.000622204	0.00257891	0.0019567	0.0319187	0.0772877
glucose metabolic process	biological_process	24.68	11.15	0.00307124	0.00557398	0.00250274	0.0999108	0.0761727
chromosome	cellular_component	108.08	36.68	0.0134496	0.0183362	0.00488663	0.109987	0.0758699
cell-cell junction	cellular_component	48	18.73	0.00597317	0.00936289	0.00338973	0.0950073	0.0747616
response to DNA damage stimulus	biological_process	171.39	51.12	0.0213278	0.0255532	0.00422536	0.267175	0.0732525
response to insulin stimulus	biological_process	12.52	7.54	0.00155799	0.00376879	0.0022108	0.0517172	0.0719426
transcription cofactor activity	molecular_function	13.74	8.29	0.00170979	0.00414341	0.00243362	0.0516906	0.0700427
clathrin-coated vesicle	cellular_component	10.54	8.42	0.00131162	0.00420847	0.00289685	0.00985317	0.0700104
response to endoplasmic reticulum stress	biological_process	10.52	6.66	0.00130911	0.00332976	0.00202065	0.0689768	0.067636
nuclear envelope	cellular_component	39.1	15.03	0.00486561	0.00751392	0.0026483	0.173196	0.0657851
protein dimerization activity	molecular_function	56.5	20.94	0.00703086	0.0104663	0.00343545	0.145098	0.0649216
protein N-terminus binding	molecular_function	44.94	17.08	0.00559239	0.00853654	0.00294415	0.147543	0.064254
kinase binding	molecular_function	19.89	9.94	0.00247512	0.00496808	0.00249297	0.0773592	0.0632453
spliceosomal complex	cellular_component	49.16	19.58	0.00611761	0.0097866	0.00366899	0.0972215	0.0627799
mitochondrion organization	biological_process	14.73	8.05	0.00183301	0.0040235	0.00219049	0.0740107	0.062551
rhythmic process	biological_process	7.13	6.05	0.000887269	0.00302395	0.00213668	0.0294813	0.0578096
response to estradiol stimulus	biological_process	8.62	5.86	0.00107266	0.00292949	0.00185684	0.0957164	0.0560743
androgen receptor signaling pathway	biological_process	6.25	5.63	0.000777749	0.00281387	0.00203612	0.0311543	0.0556868
nucleolus	cellular_component	199.16	59.33	0.0247836	0.0296585	0.00487494	0.235819	0.0518693
RNA polymerase II core promoter proximal region sequence-specific DNA binding	molecular_function	12.7	6.69	0.00158041	0.00334434	0.00176394	0.0978946	0.0481911
ligand-dependent nuclear receptor transcription coactivator activity	molecular_function	11.42	7.43	0.00142112	0.00371375	0.00229264	0.047249	0.0478447
cellular response to insulin stimulus	biological_process	16.34	8.03	0.00203339	0.00401424	0.00198085	0.121663	0.0468907
glucose homeostasis	biological_process	29.93	11.19	0.00372458	0.00559396	0.00186939	0.243791	0.0467274
BMP signaling pathway	biological_process	15.06	7.52	0.00187415	0.00375925	0.0018851	0.149129	0.0454097
protein K11-linked ubiquitination	biological_process	10.31	6.35	0.00128297	0.00317396	0.00189098	0.106926	0.0419711
basal plasma membrane	cellular_component	12.04	6.55	0.00149829	0.00327438	0.00177609	0.0984439	0.0416195
thymus development	biological_process	10.34	7.05	0.00128672	0.00352367	0.00223695	0.0593266	0.0414934
fat cell differentiation	biological_process	21.34	8.69	0.00265557	0.00434462	0.00168905	0.242201	0.0397014
liver development	biological_process	23.16	10.86	0.00288201	0.00542849	0.00254648	0.0837733	0.0390756
neural tube closure	biological_process	27.71	11.48	0.00344826	0.00573753	0.00228927	0.166133	0.0380148
positive regulation of protein phosphorylation	biological_process	52.34	18.41	0.00651317	0.00920295	0.00268978	0.217636	0.0374849
negative regulation of cysteine-type endopeptidase activity involved in apoptotic process	biological_process	27.63	10.76	0.0034383	0.00537818	0.00193987	0.225473	0.0374382
positive regulation of pathway-restricted SMAD protein phosphorylation	biological_process	10.62	5.3	0.00132158	0.0026493	0.00132772	0.199174	0.0369406
pigmentation	biological_process	14.73	6.43	0.001833	0.00321458	0.00138158	0.199341	0.0368266
apical plasma membrane	cellular_component	84.27	26.57	0.0104866	0.0132829	0.00279628	0.286084	0.0364459
cellular protein modification process	biological_process	18.58	8.64	0.00231212	0.00431917	0.00200706	0.149775	0.0363122
epithelial to mesenchymal transition	biological_process	9.55	6.29	0.00118841	0.00314405	0.00195565	0.0961857	0.0363009
methylated histone residue binding	molecular_function	17.58	8.35	0.00218767	0.00417444	0.00198678	0.136183	0.0358551
dendrite development	biological_process	10.12	5.15	0.00125933	0.00257484	0.00131551	0.197498	0.0356637
postsynaptic density	cellular_component	46.85	16.89	0.00583003	0.00844381	0.00261378	0.206585	0.03543
positive regulation of proteasomal ubiquitin-dependent protein catabolic process	biological_process	18.99	8.95	0.00236315	0.004474	0.00211085	0.153708	0.0350612
positive regulation of neuron projection development	biological_process	28.89	11.9	0.00359507	0.00594909	0.00235402	0.146377	0.0347836
dorsal/ventral pattern formation	biological_process	16.09	7.37	0.00200225	0.00368404	0.00168179	0.178865	0.0347414
positive regulation of mesenchymal cell proliferation	biological_process	16.65	7.12	0.0020719	0.00355878	0.00148688	0.300769	0.0344899
thyroid hormone receptor binding	molecular_function	9.15	5.69	0.00113863	0.00284502	0.00170639	0.108934	0.0325409
positive regulation of translation	biological_process	15.64	6.96	0.00194625	0.00347852	0.00153227	0.197439	0.031271
small GTPase mediated signal transduction	biological_process	93.63	30.13	0.0116514	0.0150605	0.00340915	0.257698	0.0306415
chromosome, telomeric region	cellular_component	18.83	7.5	0.00234322	0.00374917	0.00140595	0.314733	0.0299915
chaperone binding	molecular_function	15.07	8.24	0.00187531	0.00411901	0.0022437	0.077203	0.0294719
DNA binding, bending	molecular_function	15.01	6.3	0.00186784	0.00314888	0.00128104	0.281353	0.0293999
positive regulation of protein catabolic process	biological_process	15.74	8.05	0.00195865	0.0040238	0.00206514	0.11933	0.0292539
neuron projection development	biological_process	37.26	14.57	0.00463666	0.0072834	0.00264674	0.217052	0.0292421
skeletal muscle tissue development	biological_process	17.76	9.69	0.00221003	0.0048436	0.00263357	0.0536617	0.028959
negative regulation of BMP signaling pathway	biological_process	11.52	6.52	0.00143356	0.00325934	0.00182578	0.124698	0.028814
cell cycle arrest	biological_process	37.38	13.87	0.00465158	0.00693359	0.00228201	0.218387	0.0281333
keratinocyte differentiation	biological_process	11.74	6.44	0.0014609	0.00321891	0.00175801	0.109793	0.0275562
palate development	biological_process	25.64	10.73	0.00319062	0.00536308	0.00217246	0.156471	0.0267829
cytoplasmic membrane-bounded vesicle	cellular_component	28.51	11.88	0.00354784	0.00593891	0.00239107	0.124738	0.0266856
protein transporter activity	molecular_function	22.23	10.14	0.00276625	0.00506844	0.00230219	0.111748	0.0264984
ADP binding	molecular_function	14.12	5.97	0.00175709	0.0029841	0.00122701	0.263712	0.0263909
cytoskeleton organization	biological_process	37.05	14.12	0.0046105	0.00705841	0.0024479	0.168564	0.0263559
DNA-dependent transcription, initiation	biological_process	9.53	5.39	0.00118596	0.00269427	0.00150831	0.162974	0.0257464
cell redox homeostasis	biological_process	22.25	9.91	0.00276877	0.00495348	0.0021847	0.164532	0.0256655
positive regulation of protein binding	biological_process	14.7	7.55	0.00182927	0.00377442	0.00194515	0.129012	0.0254481
receptor tyrosine kinase binding	molecular_function	13.24	5.56	0.00164759	0.00277892	0.00113133	0.340574	0.0241681
circadian rhythm	biological_process	10.63	5.74	0.00132282	0.00286909	0.00154627	0.151302	0.023372
cell cortex	cellular_component	39.77	15.25	0.00494902	0.00762317	0.00267415	0.174175	0.0228923
nuclear body	cellular_component	14.59	7.71	0.00181556	0.00385391	0.00203835	0.110652	0.0223435
transport vesicle	cellular_component	10.52	6.07	0.00130911	0.00303383	0.00172472	0.124526	0.0222711
positive regulation of fibroblast proliferation	biological_process	20.75	8.14	0.00258205	0.00406922	0.00148717	0.309287	0.0219725
steroid binding	molecular_function	10.86	5.01	0.00135139	0.00250435	0.00115296	0.323382	0.021788
response to oxidative stress	biological_process	43.95	16.68	0.00546919	0.00833857	0.00286938	0.148675	0.0216984
Rho protein signal transduction	biological_process	16.77	7.9	0.00208685	0.00394852	0.00186168	0.136426	0.0216056
wound healing	biological_process	24.16	9.38	0.00300646	0.00468911	0.00168264	0.20555	0.0214199
Golgi organization	biological_process	17.71	8.26	0.00220384	0.00412888	0.00192504	0.137065	0.0213271
cyclin-dependent protein serine/threonine kinase activity	molecular_function	13.78	6.91	0.00171476	0.00345523	0.00174047	0.164562	0.0207069
hair follicle development	biological_process	13.75	6.94	0.00171101	0.00346886	0.00175785	0.149528	0.020443
protein phosphatase binding	molecular_function	27.66	10.66	0.00344205	0.00532855	0.0018865	0.292954	0.0204328
positive regulation of I-kappaB kinase/NF-kappaB cascade	biological_process	49.45	17.67	0.00615355	0.00883167	0.00267812	0.212413	0.0199571
cell proliferation	biological_process	78.17	23.96	0.00972756	0.0119771	0.00224952	0.372468	0.0194744
embryonic digit morphogenesis	biological_process	22.15	9.37	0.00275634	0.00468395	0.00192761	0.170993	0.0192208
GTPase activator activity	molecular_function	89.84	27.82	0.0111797	0.0139076	0.00272793	0.346156	0.0189455
developmental growth	biological_process	9.12	5.37	0.0011349	0.00268372	0.00154883	0.169884	0.0185814
Rho GTPase binding	molecular_function	12.57	6.1	0.0015642	0.00304919	0.001485	0.242513	0.0181997
negative regulation of cell differentiation	biological_process	11.55	6.06	0.00143728	0.00302896	0.00159168	0.129092	0.01808
structural constituent of cytoskeleton	molecular_function	15.36	5.59	0.00191147	0.00279459	0.000883113	0.436326	0.0179191
RNA polymerase II transcription factor binding	molecular_function	14.74	7.08	0.00183429	0.0035393	0.00170502	0.16668	0.017739
hemopoiesis	biological_process	30.23	11.29	0.00376181	0.00564431	0.0018825	0.287675	0.0177071
negative regulation of MAP kinase activity	biological_process	15.74	6.79	0.00195876	0.00339395	0.00143519	0.285559	0.0175263
positive regulation of cell growth	biological_process	26.54	10.78	0.00330269	0.00538816	0.00208547	0.197852	0.0173368
positive regulation of cell proliferation	biological_process	163.13	46.84	0.0203	0.0234124	0.00311246	0.374434	0.0171839
Rho guanyl-nucleotide exchange factor activity	molecular_function	26.68	10.41	0.00332008	0.00520359	0.0018835	0.25656	0.0170951
protein import into nucleus	biological_process	10.64	6.38	0.00132399	0.00318877	0.00186477	0.0818264	0.0166469
cellular process	biological_process	12.74	7.13	0.00158535	0.00356465	0.0019793	0.0802393	0.0164757
brush border membrane	cellular_component	15.39	6.4	0.00191511	0.00319912	0.00128401	0.282754	0.0162059
somatic stem cell maintenance	biological_process	13.72	6.78	0.00170726	0.00338889	0.00168163	0.16558	0.0160469
JNK cascade	biological_process	13.43	5.63	0.00167125	0.00281429	0.00114303	0.265306	0.0159878
intracellular	cellular_component	359.54	95.73	0.0447411	0.0478539	0.00311276	0.566518	0.0157751
positive regulation of multicellular organism growth	biological_process	10.03	5.21	0.00124814	0.00260432	0.00135618	0.196714	0.0155112
PML body	cellular_component	26.92	10.26	0.00334996	0.00512897	0.00177901	0.293897	0.0147191
lipid metabolic process	biological_process	178.11	50.61	0.0221639	0.0252979	0.00313405	0.403347	0.0145796
blood vessel remodeling	biological_process	15.66	7.44	0.00194877	0.00371913	0.00177037	0.150038	0.0144809
glycogen metabolic process	biological_process	12.63	6.42	0.00157169	0.00321045	0.00163876	0.148627	0.0142592
axonogenesis	biological_process	33.56	12.35	0.00417618	0.00617351	0.00199732	0.254783	0.0140791
positive regulation of phosphorylation	biological_process	12.69	5.31	0.00157912	0.00265431	0.00107519	0.359531	0.0139549
ligand-activated sequence-specific DNA binding RNA polymerase II transcription factor activity	molecular_function	12.29	5.65	0.00152937	0.00282411	0.00129473	0.246592	0.0137171
intracellular protein kinase cascade	biological_process	37.08	13.24	0.00461427	0.0066177	0.00200343	0.285088	0.0135857
positive regulation of neuron apoptotic process	biological_process	23.16	9.16	0.00288204	0.00457914	0.00169711	0.230692	0.0124031
G-protein coupled receptor binding	molecular_function	12.28	5.44	0.00152816	0.00271926	0.0011911	0.341556	0.0123062
ER-associated protein catabolic process	biological_process	16.31	6.9	0.00202963	0.0034496	0.00141997	0.300922	0.0122094
regulation of cell migration	biological_process	23.29	9.11	0.00289821	0.00455374	0.00165553	0.261785	0.0118894
telomere maintenance	biological_process	12.24	5.47	0.00152316	0.00273441	0.00121125	0.340465	0.0118833
neuron migration	biological_process	41.38	14.07	0.00514938	0.00703332	0.00188393	0.316644	0.01145
mesoderm formation	biological_process	8.6	5.17	0.00107022	0.00258446	0.00151424	0.153377	0.0114101
T cell differentiation in thymus	biological_process	12.56	5.99	0.00156295	0.00299447	0.00143152	0.244424	0.0112801
cytoplasmic vesicle	cellular_component	188.32	51.63	0.0234347	0.0258082	0.00237347	0.503255	0.0112258
histone deacetylase complex	cellular_component	12.61	5.98	0.00156918	0.0029891	0.00141991	0.164093	0.0112083
nervous system development	biological_process	129.26	36.78	0.0160852	0.0183855	0.00230023	0.463838	0.0108815
heart morphogenesis	biological_process	16.75	7.33	0.00208438	0.00366468	0.0015803	0.199106	0.0106174
androgen receptor binding	molecular_function	9.34	5.01	0.00116229	0.00250438	0.00134209	0.172359	0.0105673
RNA polymerase II activating transcription factor binding	molecular_function	10.17	5.84	0.00126552	0.00291962	0.0016541	0.126698	0.0105649
extrinsic to internal side of plasma membrane	cellular_component	11.8	5.76	0.00146846	0.00287958	0.00141113	0.199613	0.0105312
positive regulation of cell cycle	biological_process	12.47	6.03	0.00155177	0.00301411	0.00146234	0.149754	0.0102916
protein tetramerization	biological_process	10.04	5.01	0.00124936	0.00250378	0.00125443	0.198657	0.0102331
SH2 domain binding	molecular_function	12.25	6.11	0.00152432	0.00305382	0.0015295	0.216306	0.0100614
negative regulation of protein kinase activity	biological_process	21.81	9.27	0.00271405	0.00463456	0.0019205	0.190428	0.00984327
lung alveolus development	biological_process	18	7.04	0.00223993	0.00351954	0.00127961	0.316183	0.00981053
cellular response to growth factor stimulus	biological_process	13.69	5.6	0.00170358	0.0027993	0.00109572	0.265172	0.00978001
blood vessel morphogenesis	biological_process	11.59	5.24	0.00144228	0.00261896	0.00117668	0.342098	0.00969744
cell death	biological_process	23.78	9.26	0.00295914	0.00462881	0.00166967	0.26697	0.0095185
endoplasmic reticulum-Golgi intermediate compartment	cellular_component	13.1	6.86	0.00163021	0.0034282	0.00179799	0.147208	0.00942922
response to calcium ion	biological_process	17.22	6.98	0.00214285	0.00348957	0.00134672	0.30831	0.00937652
chromatin	cellular_component	36.77	12.6	0.00457565	0.00629799	0.00172235	0.359411	0.00928507
regulation of translation	biological_process	36.54	12.43	0.00454697	0.00621304	0.00166607	0.36803	0.00909242
SCF ubiquitin ligase complex	cellular_component	14.2	5.75	0.00176706	0.00287397	0.00110691	0.286135	0.00902948
negative regulation of cell proliferation	biological_process	155.56	43.3	0.019358	0.021643	0.00228508	0.52935	0.00888507
response to hypoxia	biological_process	48.68	16.13	0.00605777	0.00806298	0.00200521	0.344833	0.00852053
cell migration	biological_process	60.13	18.76	0.00748252	0.00937861	0.00189609	0.397655	0.00843519
methylation	biological_process	65.46	19.07	0.00814584	0.00953261	0.00138677	0.581615	0.00826786
positive regulation of peptidyl-serine phosphorylation	biological_process	19.13	7.73	0.00238053	0.00386375	0.00148322	0.241422	0.00825143
intermediate filament cytoskeleton	cellular_component	19.26	7.85	0.00239674	0.00392289	0.00152615	0.239545	0.00823325
negative regulation of neuron differentiation	biological_process	22.24	8.83	0.00276761	0.00441393	0.00164632	0.267024	0.00819515
regulation of Rho protein signal transduction	biological_process	27.26	9.64	0.00339224	0.00481909	0.00142685	0.311388	0.00811484
collagen binding	molecular_function	18.22	7.09	0.00226732	0.00354397	0.00127665	0.317381	0.00797532
positive regulation of protein ubiquitination	biological_process	22.22	8	0.00276501	0.00399972	0.00123471	0.373876	0.00797402
fatty acid metabolic process	biological_process	60.35	18.89	0.00750981	0.0094422	0.00193239	0.396659	0.00788474
regulation of multicellular organism growth	biological_process	10.56	5.25	0.00131408	0.00262499	0.00131091	0.19923	0.00784915
mRNA splicing, via spliceosome	biological_process	13.98	6.09	0.00173971	0.00304404	0.00130433	0.263502	0.00784047
symporter activity	molecular_function	39.24	12.04	0.00488302	0.00601814	0.00113512	0.485434	0.00758802
positive regulation of GTPase activity	biological_process	21.61	7.58	0.00268919	0.00378939	0.0011002	0.367802	0.00744473
ubiquitin ligase complex	cellular_component	14.53	6.6	0.00180813	0.00329964	0.0014915	0.189386	0.0074343
transferase activity, transferring acyl groups	molecular_function	66.46	20.54	0.00827027	0.0102667	0.0019964	0.391997	0.00743147
single-stranded DNA binding	molecular_function	23.27	8.13	0.00289575	0.00406342	0.00116767	0.388424	0.00741819
transcriptional repressor complex	cellular_component	20.14	7.88	0.0025062	0.00393868	0.00143247	0.243077	0.00741693
nuclear pore	cellular_component	21.7	8.33	0.00270036	0.00416424	0.00146388	0.277904	0.00734802
PcG protein complex	cellular_component	11.43	5.2	0.00142235	0.00259838	0.00117603	0.340661	0.00732922
structural molecule activity	molecular_function	34.8	11.85	0.00433053	0.00592377	0.00159324	0.358281	0.00724038
microtubule cytoskeleton organization	biological_process	21.03	7.99	0.002617	0.00399362	0.00137662	0.349408	0.00710709
GTPase activity	molecular_function	85.72	23.99	0.0106671	0.0119926	0.00132545	0.551666	0.00710213
centrosome	cellular_component	157.06	42.29	0.0195445	0.0211395	0.00159495	0.590391	0.00701916
cellular response to UV	biological_process	10.75	5.28	0.00133776	0.00263851	0.00130075	0.231747	0.00699145
carbohydrate binding	molecular_function	54.36	16.44	0.00676455	0.00821778	0.00145323	0.547024	0.00691973
neuromuscular junction	cellular_component	20	7.78	0.00248882	0.00388858	0.00139975	0.307403	0.00691702
heterotrimeric G-protein complex	cellular_component	14.15	5.49	0.00176082	0.00274423	0.00098341	0.381838	0.00685592
endoplasmic reticulum membrane	cellular_component	63.54	19.17	0.00790701	0.00958091	0.00167389	0.471762	0.00679917
cell differentiation	biological_process	247.44	64.9	0.0307917	0.0324404	0.00164869	0.718636	0.00660281
dendritic shaft	cellular_component	18.01	6.79	0.0022412	0.00339357	0.00115237	0.316906	0.00655852
ribonucleoprotein complex	cellular_component	128.15	35.04	0.015947	0.0175129	0.00156588	0.624386	0.006551
stem cell maintenance	biological_process	19.41	7.22	0.00241533	0.00360895	0.00119362	0.342165	0.00653791
sequence-specific DNA binding RNA polymerase II transcription factor activity	molecular_function	24.53	8.62	0.00305252	0.00430814	0.00125563	0.392515	0.00625885
kidney development	biological_process	36.12	12.04	0.00449479	0.00601778	0.00152299	0.366575	0.00623563
stress fiber	cellular_component	22.27	7.82	0.00277124	0.00390918	0.00113794	0.392576	0.00621715
focal adhesion	cellular_component	52.32	15.74	0.00651071	0.00786763	0.00135692	0.497046	0.00619684
postsynaptic membrane	cellular_component	68.15	19.44	0.00848056	0.00971725	0.00123669	0.546692	0.00608752
patterning of blood vessels	biological_process	16.62	6.59	0.0020682	0.00329402	0.00122583	0.30446	0.00607279
protein heterooligomerization	biological_process	34.32	11	0.00427079	0.00549729	0.00122649	0.455663	0.00604315
response to heat	biological_process	12.3	5.21	0.00153062	0.00260444	0.00107383	0.341332	0.00604177
cholesterol metabolic process	biological_process	38.01	12.32	0.00472998	0.00615876	0.00142878	0.473052	0.0059886
recycling endosome	cellular_component	16.9	6.68	0.00210301	0.00333912	0.0012361	0.316705	0.00595955
cysteine-type peptidase activity	molecular_function	53.94	16.7	0.00671232	0.00834797	0.00163565	0.445452	0.00594909
spindle microtubule	cellular_component	14.26	5.84	0.00177448	0.00291942	0.00114494	0.286309	0.00588386
catalytic step 2 spliceosome	cellular_component	31.39	10.59	0.00390627	0.00529332	0.00138705	0.415047	0.00582136
microtubule motor activity	molecular_function	19.26	7.15	0.00239669	0.00357427	0.00117758	0.347964	0.00578878
integral to endoplasmic reticulum membrane	cellular_component	21.55	8.04	0.00268171	0.00401807	0.00133635	0.360325	0.00577881
cartilage development	biological_process	37.57	11.65	0.00467527	0.00582333	0.00114806	0.483163	0.00577712
methyltransferase activity	molecular_function	67.01	19.07	0.00833872	0.00953261	0.00119389	0.59891	0.0057665
cell junction	cellular_component	241.32	60.36	0.0300298	0.0301721	0.000142258	0.7697	0.00572394
protein localization to plasma membrane	biological_process	13.17	5.22	0.00163889	0.00260905	0.000970164	0.376957	0.00569104
positive regulation of sequence-specific DNA binding transcription factor activity	biological_process	29.29	9.48	0.00364479	0.00473832	0.00109352	0.432453	0.00563891
histone acetyltransferase activity	molecular_function	15.03	6.36	0.00187037	0.00317931	0.00130894	0.283439	0.0056171
response to drug	biological_process	49.37	15.17	0.00614366	0.00758316	0.0014395	0.440892	0.00559711
canonical Wnt receptor signaling pathway	biological_process	34.11	10.85	0.00424467	0.00542373	0.00117906	0.454944	0.00557316
vesicle	cellular_component	15.23	5.98	0.00189519	0.00298863	0.00109344	0.418837	0.00554854
mitochondrial intermembrane space	cellular_component	13.99	5.78	0.00174097	0.0028887	0.00114773	0.349119	0.00548012
ruffle membrane	cellular_component	17.39	6.52	0.00216395	0.00325894	0.00109499	0.434491	0.00540478
mitochondrial matrix	cellular_component	27.07	9.39	0.00336848	0.00469378	0.00132531	0.398548	0.00532417
calmodulin binding	molecular_function	61.98	18.2	0.00771281	0.00910001	0.0013872	0.57507	0.00530571
protein homooligomerization	biological_process	71.12	20.58	0.00885029	0.0102879	0.00143757	0.505927	0.00527632
heart looping	biological_process	17.05	6.39	0.00212171	0.00319389	0.00107218	0.421856	0.00524313
positive regulation of proteolysis	biological_process	12.49	5.06	0.00155421	0.00252966	0.000975451	0.369957	0.00514694
phospholipid binding	molecular_function	143.2	36.9	0.01782	0.0184446	0.000624687	0.708	0.00505219
internal side of plasma membrane	cellular_component	16.71	6.1	0.0020794	0.00304955	0.000970158	0.432533	0.00496408
spindle	cellular_component	30.72	9.7	0.00382277	0.00484855	0.00102577	0.551227	0.00494985
mitochondrial inner membrane	cellular_component	152.1	39.28	0.0189273	0.0196358	0.000708461	0.716816	0.00492144
iron ion homeostasis	biological_process	14.29	5.71	0.00177825	0.00285448	0.00107623	0.383268	0.00486872
phosphoprotein binding	molecular_function	21.25	7.51	0.00264433	0.00375415	0.00110983	0.465554	0.00477269
intracellular signal transduction	biological_process	123.85	32.33	0.0154119	0.0161614	0.000749424	0.726267	0.00470409
beta-tubulin binding	molecular_function	12.83	5.25	0.00159647	0.00262486	0.00102839	0.378504	0.0046499
germ cell development	biological_process	15.83	5.67	0.00196995	0.00283444	0.000864491	0.562451	0.00464834
insulin receptor binding	molecular_function	15.73	5.77	0.00195744	0.00288398	0.000926535	0.421482	0.00462299
endoplasmic reticulum unfolded protein response	biological_process	11.54	5.41	0.00143603	0.00270502	0.00126899	0.238096	0.00458945
neuronal cell body	cellular_component	155.12	40.03	0.0193031	0.0200093	0.000706139	0.75065	0.00455596
extracellular vesicular exosome	cellular_component	25.63	8.71	0.0031894	0.00435369	0.00116429	0.39626	0.00451727
microtubule binding	molecular_function	54.29	15.81	0.00675569	0.00790478	0.0011491	0.547163	0.00451019
RNA polymerase II transcription cofactor activity	molecular_function	13.79	5.25	0.00171601	0.00262448	0.00090847	0.380569	0.00443988
DNA repair	biological_process	145.85	36.71	0.0181496	0.0183503	0.000200712	0.778154	0.00435496
carbohydrate metabolic process	biological_process	90.52	23.63	0.0112643	0.0118139	0.000549606	0.722662	0.00435214
lamellipodium	cellular_component	52.33	15.41	0.00651197	0.00770345	0.00119147	0.545633	0.00433717
heterophilic cell-cell adhesion	biological_process	13.23	5.24	0.00164633	0.0026196	0.000973264	0.37946	0.00431618
ubiquitin thiolesterase activity	molecular_function	28.85	9.33	0.00359013	0.00466284	0.00107271	0.532568	0.00427821
positive regulation of gene expression	biological_process	83.79	22.17	0.0104269	0.0110805	0.000653601	0.712188	0.004273
aminoacyl-tRNA ligase activity	molecular_function	20.01	6.46	0.00249004	0.00322907	0.000739031	0.614862	0.00427192
histone H3 acetylation	biological_process	15	6.19	0.00186661	0.0030947	0.00122809	0.347737	0.00424877
growth cone	cellular_component	38.43	11.79	0.00478223	0.00589392	0.00111169	0.493864	0.00421836
microtubule	cellular_component	118.42	30.95	0.0147361	0.0154734	0.000737227	0.755195	0.00420245
oxidoreductase activity, acting on the CH-OH group of donors, NAD or NADP as acceptor	molecular_function	17.17	6.17	0.00213664	0.00308459	0.00094795	0.437791	0.00413056
regulation of apoptotic process	biological_process	85.58	22.42	0.0106496	0.0112069	0.000557361	0.716134	0.00410603
tight junction	cellular_component	39.45	11.86	0.00490916	0.0059288	0.00101965	0.601177	0.00406554
positive regulation of phosphatidylinositol 3-kinase cascade	biological_process	22.08	7.2	0.00274763	0.00359873	0.0008511	0.491228	0.00404095
positive regulation of catalytic activity	biological_process	22.23	7.41	0.00276634	0.00370413	0.000937784	0.482133	0.00400449
somitogenesis	biological_process	16.58	5.72	0.00206323	0.00285949	0.000796256	0.437086	0.00393781
apical part of cell	cellular_component	45.01	12.95	0.00560105	0.00647198	0.000870929	0.61837	0.00392231
cation transport	biological_process	42.56	12.28	0.00529616	0.00613902	0.000842854	0.606808	0.00389028
nucleocytoplasmic transport	biological_process	13.61	5.06	0.00169365	0.00252942	0.000835775	0.561617	0.0038049
negative regulation of NF-kappaB transcription factor activity	biological_process	26.79	8.53	0.00333375	0.00426368	0.000929936	0.528281	0.00380066
induction of apoptosis	biological_process	82.06	21.62	0.0102116	0.0108076	0.000595999	0.711497	0.00378656
calcium ion transport	biological_process	54.82	15.22	0.00682176	0.00760813	0.000786368	0.656261	0.00374767
axon	cellular_component	100.3	25.17	0.0124815	0.012583	0.000101469	0.737206	0.00373424
positive regulation of cell-substrate adhesion	biological_process	16.02	5.75	0.00199353	0.00287447	0.000880939	0.422447	0.00364404
mediator complex	cellular_component	17.94	6.13	0.00223243	0.00306477	0.000832342	0.438726	0.003633
skeletal system morphogenesis	biological_process	17.95	6.13	0.00223368	0.00306393	0.000830249	0.606359	0.00362678
dendritic spine	cellular_component	31.34	9.67	0.00389998	0.00483413	0.000934149	0.560376	0.00360522
chromosome segregation	biological_process	31.29	9.21	0.00389376	0.00460321	0.000709448	0.560585	0.0035796
protein oligomerization	biological_process	24.86	7.82	0.00309358	0.00390865	0.000815067	0.517006	0.00356632
GDP binding	molecular_function	20.13	6.34	0.00250499	0.00316825	0.000663251	0.473313	0.00352169
glycolysis	biological_process	13.69	5	0.00170362	0.00249969	0.000796065	0.561837	0.00349072
skeletal system development	biological_process	41.07	11.37	0.00511068	0.00568327	0.000572594	0.720528	0.0034665
positive regulation of cell migration	biological_process	64.06	16.97	0.00797156	0.00848102	0.000509454	0.776943	0.00346512
positive regulation of peptidyl-tyrosine phosphorylation	biological_process	31.27	9	0.00389123	0.00449893	0.000607699	0.680282	0.00345897
cellular calcium ion homeostasis	biological_process	30.6	9.24	0.00380786	0.00461829	0.00081043	0.564834	0.00341046
positive regulation of cysteine-type endopeptidase activity involved in apoptotic process	biological_process	17.11	5.64	0.00212917	0.00281848	0.000689306	0.515426	0.00338728
negative regulation of protein phosphorylation	biological_process	19.09	6.42	0.00237557	0.00320914	0.000833566	0.607103	0.00338083
activation of cysteine-type endopeptidase activity involved in apoptotic process	biological_process	35.84	10.68	0.00445998	0.00533818	0.000878206	0.584991	0.00336725
SH3 domain binding	molecular_function	51.35	14.08	0.00639006	0.00703829	0.000648234	0.645425	0.00334421
regulation of cell adhesion	biological_process	16.3	5.57	0.00202838	0.00278453	0.000756146	0.496407	0.00333635
cell-matrix adhesion	biological_process	25.75	7.77	0.00320433	0.00388433	0.00068	0.66628	0.00332295
negative regulation of cell growth	biological_process	53.85	15.48	0.00670108	0.00773746	0.00103638	0.603435	0.00331575
carbohydrate transport	biological_process	18.48	5.98	0.00229966	0.00298882	0.000689157	0.608162	0.00330975
cell-cell adhesion	biological_process	46.82	12.98	0.0058263	0.0064881	0.000661806	0.743699	0.00329636
camera-type eye development	biological_process	21.65	6.79	0.00269413	0.00339436	0.000700231	0.640042	0.00323943
protein tyrosine kinase activity	molecular_function	63.22	16.31	0.00786705	0.00815274	0.000285682	0.776062	0.00323767
MAPK cascade	biological_process	33.23	9.21	0.00413515	0.00460369	0.000468538	0.570495	0.00323575
actin filament binding	molecular_function	34.87	10.35	0.00433917	0.00517345	0.000834283	0.582074	0.00323219
translational initiation	biological_process	21.91	7.35	0.00272645	0.00367371	0.000947254	0.503489	0.00322632
protein localization	biological_process	30.05	8.89	0.00373945	0.00444354	0.000704084	0.611951	0.00321362
protein homotetramerization	biological_process	25.47	7.48	0.0031695	0.00373937	0.000569873	0.661508	0.00321069
vasculogenesis	biological_process	29.04	8.9	0.00361372	0.00444915	0.000835428	0.550923	0.00319599
kinetochore	cellular_component	39.54	10.66	0.00492037	0.00532975	0.000409376	0.719809	0.00317256
potassium ion transport	biological_process	42.48	11.84	0.00528619	0.0059184	0.000632213	0.730621	0.0031504
male gonad development	biological_process	19.02	6.24	0.00236689	0.00311947	0.000752582	0.59624	0.00312293
ATPase activity	molecular_function	55.68	14.31	0.00692888	0.00715251	0.00022363	0.766278	0.00307116
regulation of gene expression	biological_process	55.44	14.26	0.00689904	0.00712853	0.000229497	0.765286	0.00306896
helicase activity	molecular_function	62.47	16.68	0.00777387	0.00833704	0.000563172	0.771226	0.00304763
peroxisomal membrane	cellular_component	19.14	6	0.00238182	0.002999	0.000617184	0.60673	0.00304329
mitochondrial membrane	cellular_component	24.99	7.5	0.0031097	0.00374895	0.000639246	0.643446	0.00299808
elevation of cytosolic calcium ion concentration	biological_process	48.79	13.23	0.00607144	0.00661326	0.000541824	0.747267	0.0029099
translation initiation factor activity	molecular_function	21.91	6.97	0.00272645	0.00348389	0.000757436	0.629489	0.00288664
positive regulation of inflammatory response	biological_process	15.97	5.13	0.00198723	0.0025641	0.000576869	0.58961	0.0028226
cerebral cortex development	biological_process	16.63	5.52	0.0020695	0.00275929	0.000689793	0.589726	0.00277525
negative regulation of signal transduction	biological_process	20.49	5.72	0.0025498	0.00285953	0.000309731	0.62793	0.00277463
forebrain development	biological_process	30.08	8.59	0.00374315	0.00429362	0.000550471	0.689052	0.00276558
intrinsic apoptotic signaling pathway in response to DNA damage	biological_process	18.39	5.82	0.00228849	0.00291017	0.000621674	0.615776	0.00272391
integrin binding	molecular_function	34.78	9.82	0.00432809	0.0049098	0.000581708	0.704893	0.00272352
peptidyl-tyrosine phosphorylation	biological_process	31	9.08	0.00385762	0.00453931	0.000681691	0.691452	0.00263387
double-stranded RNA binding	molecular_function	18.99	5.93	0.00236316	0.00296426	0.000601098	0.616387	0.00260453
regulation of protein phosphorylation	biological_process	17.54	5.21	0.00218266	0.00260435	0.000421684	0.611677	0.00256571
actin filament organization	biological_process	18.9	6.11	0.00235188	0.00305443	0.000702549	0.607145	0.00254616
protein autoubiquitination	biological_process	16.57	5.45	0.00206199	0.002725	0.000663015	0.589659	0.00254499
axon terminus	cellular_component	15.01	5.04	0.0018679	0.00251961	0.000651707	0.573853	0.00251114
Notch signaling pathway	biological_process	33.13	8.97	0.00412266	0.00448452	0.000361864	0.706422	0.00249318
embryonic limb morphogenesis	biological_process	25.01	6.54	0.00311228	0.00326889	0.000156616	0.820281	0.00247118
negative regulation of catalytic activity	biological_process	29.32	7.44	0.00364858	0.00371842	6.98e-05	0.8309	0.00237305
positive regulation of protein kinase activity	biological_process	20.29	6.35	0.00252492	0.00317394	0.000649022	0.617213	0.00235448
skin development	biological_process	19.8	5.92	0.00246393	0.00295909	0.000495159	0.626498	0.00233888
centriole	cellular_component	22.25	6.7	0.0027688	0.00334946	0.000580664	0.646648	0.00232231
tRNA aminoacylation for protein translation	biological_process	18.04	5.46	0.00224487	0.00272918	0.000484312	0.628941	0.00227676
glycoprotein binding	molecular_function	24.62	6.16	0.00306375	0.00307874	1.5e-05	0.820204	0.00224452
ATP-dependent helicase activity	molecular_function	29.66	7.79	0.00369099	0.00389423	0.000203239	0.833028	0.00223589
iron-sulfur cluster binding	molecular_function	35.04	9.22	0.00436039	0.00460918	0.000248786	0.780296	0.0021921
steroid metabolic process	biological_process	33.37	8.94	0.00415261	0.00446877	0.000316156	0.709859	0.0021884
cell periphery	cellular_component	20.98	5.38	0.0026108	0.00268904	7.82e-05	0.803746	0.00216957
protein glycosylation	biological_process	28.16	7.63	0.00350425	0.00381428	0.000310033	0.757354	0.00211335
non-membrane spanning protein tyrosine kinase activity	molecular_function	20.38	5.79	0.00253609	0.00289451	0.000358425	0.628471	0.0019877
inner ear morphogenesis	biological_process	28	7.97	0.00348434	0.00398379	0.000499448	0.678536	0.00193644
positive regulation of MAP kinase activity	biological_process	23.34	6.92	0.00290443	0.0034591	0.000554665	0.654855	0.0019348
RNA processing	biological_process	18.88	5.07	0.0023495	0.00253421	0.00018472	0.789035	0.00192636
determination of left/right symmetry	biological_process	19.3	5.6	0.00240169	0.00279926	0.00039757	0.629379	0.00188977
actin filament	cellular_component	22.03	5.77	0.00274139	0.00288339	0.000142003	0.809035	0.00184198
Rab GTPase activator activity	molecular_function	23.11	5.94	0.0028758	0.00296911	9.33e-05	0.813984	0.00182777
cell morphogenesis	biological_process	25.42	6.5	0.00316325	0.00324926	8.6e-05	0.824294	0.00180858
lipid transport	biological_process	28.49	7.46	0.00354527	0.00372977	0.0001845	0.833613	0.00178155
sodium ion transmembrane transport	biological_process	26.54	6.79	0.00330266	0.00339455	9.19e-05	0.827279	0.00178099
cysteine-type endopeptidase activity	molecular_function	20.1	5.51	0.00250126	0.00275434	0.000253078	0.803567	0.0017461
osteoblast differentiation	biological_process	21	5.54	0.00261326	0.00276918	0.000155923	0.808735	0.00169999
regulation of blood pressure	biological_process	25.7	7.4	0.00319809	0.00369903	0.000500934	0.745804	0.00161899
embryonic skeletal system development	biological_process	20.16	5.17	0.0025087	0.00258457	7.59e-05	0.808285	0.00156802
regulation of Rab GTPase activity	biological_process	21.11	5.5	0.00262692	0.00274902	0.000122103	0.808974	0.0015676
smoothened signaling pathway	biological_process	23.69	6.27	0.002948	0.00313419	0.000186188	0.819831	0.00155923
spindle pole	cellular_component	21.66	5.45	0.00269538	0.00272437	2.9e-05	0.813294	0.00149563

## Sheet: C2C12
Gene Ontology categories for transcripts with CELF1 binding in 3' UTRs (CLIP from C2C12)
#Category	Group	No. in control genes (out of 5115)	No. in CLIPped genes (out of 1011)	Frequency in control genes	Frequency in CLIPped genes	Delta Frequency	Median p value	Bayes Factor
cleavage furrow	cellular_component	6.86	7	0.00134125	0.00692496	0.00558371	0.00383247	inf
nucleus	cellular_component	1520.18	420.14	0.297216	0.415635	0.118419	4.21e-10	inf
chromosome segregation	biological_process	17.23	14	0.00336861	0.0138499	0.0104813	0.00017179	inf
cochlea morphogenesis	biological_process	5.09	6	0.000995128	0.00593568	0.00494055	0.00434188	inf
Ran GTPase binding	molecular_function	5.05	6	0.000987418	0.00593568	0.00494826	0.00434926	inf
outflow tract morphogenesis	biological_process	11.67	9	0.00228162	0.00890352	0.0066219	0.00388992	inf
extracellular vesicular exosome	cellular_component	14.66	11	0.00286629	0.0108821	0.00801579	0.0016106	inf
protein binding	molecular_function	1038.38	299.16	0.203018	0.295953	0.092935	5.87e-10	inf
positive regulation of DNA replication	biological_process	12.15	10	0.0023754	0.0098928	0.0075174	0.00138709	inf
positive regulation of Rho GTPase activity	biological_process	5.88	6	0.00114962	0.00593568	0.00478605	0.00747354	2.24e+300
midbody	cellular_component	27.48	16	0.00537266	0.0158285	0.0104558	0.00146092	1.48e+283
unfolded protein binding	molecular_function	12.35	10	0.00241457	0.0098928	0.00747822	0.00137011	3.74e+264
cytoplasm	cellular_component	1600.49	403.03	0.312917	0.398709	0.0857918	2.13e-07	5.85e+236
cell surface	cellular_component	105.82	41.87	0.0206893	0.0414213	0.020732	0.000302077	1.09e+231
protein kinase C binding	molecular_function	11.49	10.71	0.00224635	0.0105952	0.00834882	0.000527665	2.67e+228
cellular response to hydrogen peroxide	biological_process	4.42	5	0.000864175	0.0049464	0.00408222	0.00861303	2.9e+213
cytokinesis	biological_process	14.74	11	0.00288191	0.0108821	0.00800017	0.00162733	1.87e+203
protein kinase binding	molecular_function	98.02	45.1	0.0191643	0.0446166	0.0254523	7.16e-06	1.65e+200
GDP binding	molecular_function	13.63	11.51	0.00266487	0.0113866	0.00872177	0.000588468	4.08e+189
cellular response to interleukin-4	biological_process	3.89	5	0.000760566	0.0049464	0.00418583	0.00847167	6.01e+170
mitotic spindle	cellular_component	4.66	5	0.000911062	0.0049464	0.00403534	0.0146225	3.77e+162
small GTPase mediated signal transduction	biological_process	66.89	31.82	0.0130777	0.0314787	0.018401	0.00011851	9.06e+139
endoplasmic reticulum membrane	cellular_component	39.86	18.59	0.00779317	0.0183908	0.0105976	0.00424298	5.55e+138
cellular response to calcium ion	biological_process	7.35	5	0.00143705	0.0049464	0.00350935	0.0350191	1.07e+138
regulation of cell cycle	biological_process	27.89	15.59	0.00545291	0.0154229	0.00997001	0.00211398	9.77e+136
response to hydrogen peroxide	biological_process	5.81	5	0.00113595	0.0049464	0.00381045	0.0232989	4.52e+135
GTP binding	molecular_function	102.78	42.72	0.0200947	0.0422619	0.0221672	9.73e-05	4.58e+133
placenta development	biological_process	8.44	6	0.00165021	0.00593568	0.00428547	0.0258259	2.91e+129
vascular endothelial growth factor receptor signaling pathway	biological_process	6.59	5	0.00128848	0.0049464	0.00365791	0.0344927	1.38e+128
cell cycle	biological_process	177.59	57.25	0.0347212	0.0566362	0.021915	0.00157984	2.22e+121
nucleotide binding	molecular_function	571.67	161	0.111769	0.159273	0.0475044	3.54e-05	2.82e+117
GTP catabolic process	biological_process	42.71	23.87	0.00835028	0.023614	0.0152637	9.98e-05	1.87e+116
chromosome, centromeric region	cellular_component	30.19	14	0.00590246	0.0138499	0.00794745	0.0137716	5.87e+105
protein localization to nucleus	biological_process	7.72	5	0.00150931	0.0049464	0.00343709	0.0487691	7.85e+104
cytoplasmic stress granule	cellular_component	9.78	8.55	0.00191217	0.00845847	0.0065463	0.00259036	6.54e+100
mitosis	biological_process	70.11	28.26	0.0137075	0.0279568	0.0142493	0.00212656	8.06e+99
ubiquitin protein ligase binding	molecular_function	48.86	26.8	0.00955277	0.0265124	0.0169596	5.35e-05	2.34e+99
negative regulation of apoptotic process	biological_process	139.45	51.77	0.0272645	0.0512149	0.0239505	0.000174295	2.06e+99
chromosome	cellular_component	69.96	26.57	0.0136782	0.0262851	0.0126069	0.0060368	1.29e+96
positive regulation of reactive oxygen species metabolic process	biological_process	6.33	5	0.00123762	0.0049464	0.00370878	0.0236396	1.96e+90
cellular process	biological_process	9.03	6	0.00176547	0.00593568	0.00417021	0.0261492	3.49e+89
cytoskeleton	cellular_component	278.75	84.24	0.0544992	0.0833368	0.0288376	0.000614347	4.19e+87
actin binding	molecular_function	87.15	31.36	0.0170388	0.0310237	0.0139848	0.00536449	1.8e+83
coated pit	cellular_component	17.95	9	0.00350949	0.00890352	0.00539403	0.0320614	8.55e+82
nuclear envelope	cellular_component	22.54	12.63	0.00440689	0.0124945	0.00808762	0.0058299	1.1e+82
caveola	cellular_component	17.73	12.74	0.0034664	0.0126033	0.00913695	0.000972904	8.81e+80
vesicle-mediated transport	biological_process	70.36	23	0.0137564	0.0227534	0.00899704	0.0484032	7.75e+78
protein complex	cellular_component	125.22	45.91	0.0244822	0.0454182	0.020936	0.000487056	3.14e+75
cell differentiation	biological_process	150.44	50.72	0.029413	0.0501757	0.0207628	0.00150998	1.58e+73
GTPase activity	molecular_function	55.03	25.55	0.0107589	0.025276	0.0145171	0.000834356	2.71e+70
cell-cell junction	cellular_component	32.77	14.56	0.00640694	0.0144039	0.00799695	0.0122454	1.18e+70
cellular response to amino acid stimulus	biological_process	7.08	5	0.00138425	0.0049464	0.00356215	0.0349834	5.79e+66
ovarian follicle development	biological_process	6.16	6.59	0.00120441	0.00651939	0.00531498	0.00391279	3.24e+66
rough endoplasmic reticulum	cellular_component	8.92	5	0.001744	0.0049464	0.0032024	0.0661156	1.1e+65
negative regulation of neuron apoptotic process	biological_process	29.89	13.64	0.00584397	0.0134938	0.00764981	0.0139741	8.28e+63
Golgi apparatus	cellular_component	330	88.36	0.0645199	0.0874122	0.0228924	0.0101698	4.02e+63
wound healing	biological_process	20.77	8	0.00406077	0.00791424	0.00385347	0.127101	1.11e+62
intracellular	cellular_component	229.77	66.9	0.0449232	0.066183	0.0212599	0.00501627	7.93e+61
blood vessel morphogenesis	biological_process	11.06	5	0.00216236	0.0049464	0.00278404	0.165096	1.48e+61
beta-tubulin binding	molecular_function	8.3	5	0.00162273	0.0049464	0.00332367	0.0493659	1.4e+59
regulation of transcription, DNA-dependent	biological_process	563.11	145.38	0.110096	0.14382	0.0337245	0.00298917	8.08e+57
structural molecule activity	molecular_function	24.46	11	0.00478215	0.0108821	0.00609993	0.0381903	4.21e+55
cell division	biological_process	104.96	35.16	0.0205211	0.034783	0.014262	0.00848791	1.37e+55
apical plasma membrane	cellular_component	48.29	20.4	0.00944139	0.0201812	0.0107398	0.00559013	3.83e+53
endosome	cellular_component	132.56	43.18	0.0259173	0.042717	0.0167997	0.00539679	1.23e+53
response to estrogen stimulus	biological_process	7.86	6.61	0.00153666	0.00653907	0.00500241	0.00948017	1.85e+52
Golgi membrane	cellular_component	30.45	12	0.00595355	0.0118714	0.00591781	0.0580423	9.95e+50
mRNA transport	biological_process	16.9	9.59	0.00330413	0.00948709	0.00618296	0.011005	5.58e+50
positive regulation of catalytic activity	biological_process	13.36	6	0.00261198	0.00593568	0.0033237	0.111599	5.09e+50
response to stress	biological_process	34.96	13.64	0.00683522	0.0134936	0.00665839	0.0403249	2.15e+50
transcription, DNA-dependent	biological_process	536.8	137.45	0.104952	0.135976	0.0310238	0.00505113	9.59e+49
nucleoplasm	cellular_component	42.81	16.34	0.00837014	0.0161648	0.00779465	0.0274753	5.74e+49
cell cortex	cellular_component	28.72	14.22	0.00561512	0.0140675	0.00845239	0.00815763	4.48e+49
Notch signaling pathway	biological_process	21.32	8	0.00416839	0.00791424	0.00374584	0.128395	6.92e+48
RNA binding	molecular_function	176.16	54.16	0.0344418	0.0535793	0.0191375	0.00507736	1.72e+46
glycoprotein binding	molecular_function	17.67	7	0.00345468	0.00692496	0.00347028	0.168965	1.15e+46
protein dimerization activity	molecular_function	39.73	17.79	0.00776763	0.0175995	0.00983184	0.00599685	2.09e+45
transcription factor binding	molecular_function	85.05	33.7	0.0166284	0.0333388	0.0167105	0.000868449	1.15e+43
cytosol	cellular_component	267.16	74.78	0.0522335	0.0739784	0.0217449	0.00764778	7.49e+42
mitogen-activated protein kinase kinase kinase binding	molecular_function	7.06	5.59	0.00138035	0.00552995	0.0041496	0.0182552	2.27e+42
chromatin binding	molecular_function	98.43	34.76	0.0192443	0.0343876	0.0151433	0.00393285	7.85e+41
positive regulation of translation	biological_process	13.48	6	0.00263553	0.00593568	0.00330015	0.124036	2.94e+41
RNA polymerase II distal enhancer sequence-specific DNA binding transcription factor activity	molecular_function	24.2	11.16	0.00473135	0.0110402	0.00630889	0.027	2.46e+41
recycling endosome	cellular_component	10.6	8.15	0.00207244	0.00806261	0.00599017	0.00495084	3.18e+40
chromosome, telomeric region	cellular_component	9.7	5	0.00189651	0.0049464	0.00304989	0.0670524	1.99e+40
spindle pole	cellular_component	11.24	6	0.00219759	0.00593568	0.00373809	0.0484514	3.62e+39
ionotropic glutamate receptor binding	molecular_function	6.18	5.63	0.00120827	0.00556965	0.00436138	0.012103	1.73e+39
protein folding	biological_process	25.7	11.55	0.00502478	0.0114262	0.00640141	0.0287644	3.29e+38
positive regulation of protein catabolic process	biological_process	9.29	8.15	0.00181635	0.00806273	0.00624639	0.00320688	3.94e+36
lipid particle	cellular_component	13.49	6	0.00263748	0.00593568	0.00329819	0.117497	3.77e+36
spindle microtubule	cellular_component	10	6.55	0.00195505	0.00647985	0.00452481	0.0193565	2.78e+36
cytoskeletal protein binding	molecular_function	18.68	7	0.00365223	0.00692496	0.00327273	0.179165	2.43e+35
signalosome	cellular_component	9.18	6.56	0.00179476	0.00648964	0.00469487	0.0178932	1.11e+35
kinetochore	cellular_component	24.69	12.22	0.00482714	0.0120889	0.00726181	0.0115707	6.9e+34
regulation of transcription from RNA polymerase II promoter	biological_process	76.06	26.92	0.0148707	0.0266312	0.0117605	0.0136399	6.27e+34
response to calcium ion	biological_process	13.12	6	0.00256519	0.00593568	0.00337049	0.111408	3.67e+34
mitochondrial outer membrane	cellular_component	33.66	13	0.00658105	0.0128606	0.00627959	0.0452673	1.69e+34
protein domain specific binding	molecular_function	74.29	25.99	0.0145247	0.0257115	0.0111868	0.0136203	7.6e+33
response to DNA damage stimulus	biological_process	106.35	33.06	0.0207931	0.0327057	0.0119125	0.0278038	6.96e+32
positive regulation of smooth muscle cell proliferation	biological_process	20.84	8.61	0.00407456	0.00851772	0.00444316	0.0837544	2.5e+32
cell leading edge	cellular_component	7.43	5.63	0.00145261	0.00556955	0.00411694	0.0183469	2.26e+32
heart looping	biological_process	13.47	6	0.00263352	0.00593568	0.00330216	0.111809	9.68e+31
RNA polymerase II regulatory region sequence-specific DNA binding	molecular_function	3.66	5.15	0.000715602	0.00509485	0.00437924	0.00437981	4.07e+30
positive regulation of proteasomal ubiquitin-dependent protein catabolic process	biological_process	13.48	6	0.00263557	0.00593568	0.00330011	0.12386	1.99e+30
protein complex binding	molecular_function	74.06	27.24	0.0144797	0.026948	0.0124683	0.00710457	6.32e+29
ventricular septum development	biological_process	1.8	5.14	0.000351914	0.00508491	0.004733	0.0018808	3.41e+28
regulation of catalytic activity	biological_process	29.44	10	0.00575582	0.0098928	0.00413698	0.138754	2.91e+28
cell redox homeostasis	biological_process	14.87	8.58	0.00290722	0.00848787	0.00558065	0.0144356	1.89e+28
positive regulation of cell proliferation	biological_process	108.51	32.34	0.0212151	0.031993	0.0107779	0.0450019	1.27e+28
cell-cell adherens junction	cellular_component	12.25	6.59	0.00239502	0.0065194	0.00412438	0.0483518	1.04e+28
nucleocytoplasmic transport	biological_process	11.08	5	0.00216629	0.0049464	0.00278011	0.165147	9.98e+27
protein C-terminus binding	molecular_function	58.73	21.32	0.0114825	0.0210914	0.00960887	0.0234485	5.04e+27
mRNA processing	biological_process	71.02	26.76	0.0138853	0.0264728	0.0125876	0.00673249	7.21e+26
heterochromatin	cellular_component	7.41	5.57	0.00144882	0.00551022	0.00406139	0.0244232	3.79e+26
spindle	cellular_component	17.85	8.63	0.00348988	0.00853735	0.00504746	0.0425302	2.83e+26
transcription factor complex	cellular_component	74.45	27.84	0.0145559	0.0275413	0.0129853	0.00582829	2.16e+26
positive regulation of phosphatidylinositol 3-kinase cascade	biological_process	12.06	5	0.00235794	0.0049464	0.00258846	0.18138	2.13e+26
negative regulation of cysteine-type endopeptidase activity involved in apoptotic process	biological_process	18.51	8.64	0.003619	0.00854738	0.00492838	0.0436655	4.5e+25
transcription regulatory region DNA binding	molecular_function	49.67	18.37	0.009711	0.0181731	0.00846207	0.0269762	2.73e+25
blood vessel development	biological_process	17.58	8.71	0.00343714	0.00861661	0.00517947	0.0372136	1.13e+25
GTPase activator activity	molecular_function	60.96	21.11	0.0119186	0.0208836	0.00896503	0.0333656	1.47e+24
nuclear chromatin	cellular_component	29.29	12.81	0.00572667	0.0126728	0.00694616	0.0221529	3.41e+23
histone deacetylase binding	molecular_function	19.68	10.21	0.00384767	0.0101006	0.00625292	0.0172725	1.32e+23
RNA splicing	biological_process	54.59	20.5	0.010673	0.02028	0.00960702	0.0168402	6.88e+22
ER to Golgi vesicle-mediated transport	biological_process	10.95	5	0.00214088	0.0049464	0.00280552	0.165038	6.07e+22
positive regulation of JUN kinase activity	biological_process	8.6	5.64	0.00168146	0.00557937	0.00389791	0.0262085	4.35e+22
protein homooligomerization	biological_process	37.97	13.68	0.00742372	0.0135333	0.00610959	0.0619614	1.25e+22
membrane raft	cellular_component	52.59	17.8	0.010282	0.0176092	0.00732714	0.0557193	1.01e+22
collagen binding	molecular_function	9.08	5.64	0.00177524	0.00557948	0.00380423	0.0358298	8.55e+21
cellular response to insulin stimulus	biological_process	16.02	6	0.00313217	0.00593568	0.00280351	0.24229	4.03e+21
endoplasmic reticulum	cellular_component	325.53	81	0.0636459	0.0801319	0.016486	0.0616809	1.44e+21
transcriptional repressor complex	cellular_component	15.07	8.17	0.00294636	0.00808247	0.00513611	0.0282957	4.57e+20
DNA repair	biological_process	84.34	26.82	0.0164898	0.0265325	0.0100427	0.0386816	3.67e+20
negative regulation of cell migration	biological_process	22.58	10.72	0.00441466	0.010605	0.00619031	0.0256525	1.21e+20
negative regulation of smooth muscle cell proliferation	biological_process	9.22	6.09	0.00180261	0.00602465	0.00422204	0.0262004	1.13e+20
proteasome complex	cellular_component	11.13	5	0.00217621	0.0049464	0.00277019	0.165272	9.45e+19
positive regulation of transcription, DNA-dependent	biological_process	155.55	48.18	0.0304121	0.047663	0.0172508	0.00730029	1.26e+19
transcription from RNA polymerase II promoter	biological_process	32.86	13.83	0.00642464	0.0136816	0.00725691	0.0252889	4.23e+18
actin cytoskeleton organization	biological_process	40.22	15.63	0.00786353	0.0154624	0.00759887	0.0291289	2.47e+18
T cell differentiation in thymus	biological_process	8.34	6.21	0.00163057	0.00614345	0.00451288	0.0180004	1.75e+18
regulation of cell proliferation	biological_process	41.54	14.21	0.00812168	0.0140579	0.00593621	0.0784572	8.52e+17
response to drug	biological_process	30.92	12.16	0.00604533	0.0120296	0.00598425	0.0518636	8.47e+17
developmental growth	biological_process	7.87	6.14	0.00153866	0.00607413	0.00453547	0.0159067	7.54e+17
positive regulation of neuron apoptotic process	biological_process	17.1	7.59	0.00334333	0.00750887	0.00416554	0.0716631	2.48e+17
ruffle membrane	cellular_component	11.81	6.59	0.00230898	0.0065194	0.00421042	0.0478055	1.76e+17
blood vessel remodeling	biological_process	13.16	5	0.00257305	0.0049464	0.00237334	0.201926	1.54e+17
isomerase activity	molecular_function	30.65	10.55	0.00599254	0.0104369	0.00444437	0.125529	9.44e+16
lateral plasma membrane	cellular_component	9.28	5.59	0.00181427	0.00553012	0.00371585	0.0419192	8.03e+16
positive regulation of protein phosphorylation	biological_process	32.24	12.69	0.00630337	0.012554	0.00625064	0.0473283	7.44e+16
ubiquitin-dependent protein catabolic process	biological_process	45.05	15.99	0.00880804	0.0158184	0.00701033	0.0543765	2.61e+16
DNA binding	molecular_function	486.95	119.17	0.0952055	0.117891	0.0226859	0.032441	1.31e+16
negative regulation of protein phosphorylation	biological_process	14.81	6.64	0.00289549	0.00656901	0.00367352	0.0868354	6490000000000000
in utero embryonic development	biological_process	81.34	25.36	0.0159032	0.0250879	0.00918475	0.0518531	1670000000000000
Rho GTPase binding	molecular_function	8.38	5.65	0.00163842	0.00558959	0.00395117	0.0261217	1360000000000000
protein phosphorylation	biological_process	197.37	54.81	0.0385888	0.0542226	0.0156339	0.0287215	1310000000000000
protein heterodimerization activity	molecular_function	106.24	32.72	0.0207716	0.0323692	0.0115977	0.0288471	261000000000000
heart morphogenesis	biological_process	12.94	6.52	0.00252992	0.00645007	0.00392015	0.0680114	138000000000000
positive regulation of cell growth	biological_process	21.61	9.26	0.00422515	0.00916053	0.00493539	0.065409	16400000000000
centrosome	cellular_component	98.38	28.69	0.0192344	0.0283826	0.00914813	0.0680907	13500000000000
perinuclear region of cytoplasm	cellular_component	128.8	35.39	0.025182	0.0350105	0.00982842	0.0886034	4200000000000
vasculogenesis	biological_process	19.32	7.59	0.00377735	0.00750853	0.00373118	0.127431	3980000000000
transcription initiation from RNA polymerase II promoter	biological_process	8.37	6.31	0.00163646	0.00624215	0.00460569	0.0137784	3410000000000
translational initiation	biological_process	16.1	6	0.00314782	0.00593568	0.00278786	0.242007	2390000000000
plasma membrane	cellular_component	769.14	174.75	0.150377	0.172876	0.0224993	0.0746848	1250000000000
chromatin modification	biological_process	81.15	24.94	0.0158663	0.0246729	0.00880661	0.0648499	1170000000000
cytoplasmic membrane-bounded vesicle	cellular_component	19.51	9.62	0.0038145	0.00951709	0.00570259	0.0264684	862000000000
integrin binding	molecular_function	20.53	9.17	0.00401397	0.00907159	0.00505762	0.0439766	751000000000
cell migration	biological_process	42.4	15.13	0.00828979	0.0149676	0.00667784	0.0629129	724000000000
sequence-specific DNA binding transcription factor activity	molecular_function	199.71	58.06	0.0390458	0.0574368	0.018391	0.010977	421000000000
heart development	biological_process	50.67	17.36	0.00990655	0.0171738	0.00726725	0.0611441	347000000000
beta-catenin binding	molecular_function	16.94	10.39	0.00331204	0.0102787	0.00696669	0.00571196	277000000000
receptor-mediated endocytosis	biological_process	13.58	5	0.00265508	0.0049464	0.00229132	0.213399	136000000000
sequence-specific DNA binding	molecular_function	143.42	41.26	0.0280404	0.040817	0.0127766	0.0359704	131000000000
SH2 domain binding	molecular_function	10.82	5.56	0.00211542	0.00550024	0.00338482	0.0861643	39937267064
G1/S transition of mitotic cell cycle	biological_process	16.29	6	0.00318506	0.00593568	0.00275062	0.242491	39152235722
kinase activity	molecular_function	220.89	59.06	0.0431872	0.0584269	0.0152397	0.0343416	19001864461
neural tube closure	biological_process	24.62	8.65	0.00481352	0.00855743	0.00374392	0.165974	18250465166
cellular response to lipopolysaccharide	biological_process	14.26	5	0.00278804	0.0049464	0.00215836	0.226807	15543001617
positive regulation of mesenchymal cell proliferation	biological_process	5.96	5.21	0.00116525	0.00515393	0.00398868	0.0182048	15240034788
chaperone binding	molecular_function	12.53	5	0.0024498	0.0049464	0.00249659	0.181982	7730199469
nervous system development	biological_process	92.14	26.07	0.0180146	0.0257905	0.00777584	0.106168	1885799192
spliceosomal complex	cellular_component	31.82	12.17	0.00622114	0.0120394	0.00581826	0.062523	1506495747
microvillus	cellular_component	11.71	5	0.0022894	0.0049464	0.002657	0.181382	7.52765e+08
angiogenesis	biological_process	67.11	20.76	0.0131208	0.0205373	0.00741641	0.0842858	5.85849e+08
embryo development	biological_process	32.35	13.71	0.00632494	0.0135627	0.00723772	0.0216058	1.98421e+08
muscle organ development	biological_process	11.3	6.74	0.00220921	0.00666744	0.00445824	0.0264816	9.78391e+07
sarcolemma	cellular_component	21.7	7	0.00424261	0.00692496	0.00268235	0.209053	9.39227e+07
growth factor binding	molecular_function	11.83	6.18	0.00231298	0.00611359	0.00380061	0.0484025	6.39214e+07
intracellular protein transport	biological_process	56.01	16.56	0.0109507	0.0163825	0.00543174	0.153926	5.18646e+07
nuclear pore	cellular_component	13.01	5	0.0025436	0.0049464	0.0024028	0.201809	4.98836e+07
chromatin remodeling	biological_process	15.58	7.19	0.00304616	0.00711309	0.00406693	0.0741053	3.93211e+07
protein complex assembly	biological_process	15.05	6.28	0.00294252	0.00621262	0.0032701	0.124491	2.12102e+07
Golgi organization	biological_process	12.97	5.68	0.00253593	0.00561906	0.00308314	0.125358	1.57228e+07
actin cytoskeleton	cellular_component	44.1	16.44	0.00862206	0.0162636	0.00764156	0.034037	8.36013e+06
apoptotic process	biological_process	174.66	45.03	0.0341485	0.0445467	0.0103982	0.109733	7.91343e+06
canonical Wnt receptor signaling pathway	biological_process	22.34	10.33	0.0043678	0.0102194	0.00585163	0.032061	6.9136e+06
neuromuscular junction	cellular_component	15.92	6	0.00311254	0.00593568	0.00282314	0.242411	5.24596e+06
extracellular matrix	cellular_component	54.74	16	0.0107025	0.0158285	0.00512598	0.196424	2.08152e+06
ubiquitin ligase complex	cellular_component	13.41	5	0.00262187	0.0049464	0.00232453	0.202623	1.45472e+06
negative regulation of cell proliferation	biological_process	107.15	29.54	0.0209493	0.0292232	0.00827394	0.109226	1.31513e+06
positive regulation of transcription from RNA polymerase II promoter	biological_process	222.11	58.12	0.0434255	0.0574976	0.0140721	0.058618	1.2091e+06
nucleosome assembly	biological_process	14.42	5	0.00281941	0.0049464	0.00212699	0.291898	1.20838e+06
cell body	cellular_component	17.36	6	0.00339423	0.00593568	0.00254145	0.254006	1.07194e+06
heterotrimeric G-protein complex	cellular_component	10.75	5.21	0.00210177	0.00515406	0.00305229	0.10115	808192
protein transport	biological_process	189.04	46.91	0.0369599	0.046407	0.00944713	0.155974	802747
regulation of translation	biological_process	31.58	10.2	0.00617442	0.0100905	0.0039161	0.19547	579928
protein kinase activity	molecular_function	167.84	44.98	0.0328153	0.0444976	0.0116824	0.0662924	544478
protein serine/threonine kinase activity	molecular_function	131.99	37.17	0.0258061	0.0367717	0.0109656	0.06305	427734
response to lipopolysaccharide	biological_process	23.7	8	0.00463367	0.00791424	0.00328057	0.226996	382326
recycling endosome membrane	cellular_component	7.94	5.66	0.00155242	0.00559933	0.00404691	0.025904	348590
chloride transport	biological_process	13.86	5	0.00270994	0.0049464	0.00223646	0.225282	267744
basement membrane	cellular_component	25.38	9.2	0.0049621	0.00910142	0.00413932	0.120949	212283
phosphorylation	biological_process	221.52	57.06	0.0433104	0.0564484	0.013138	0.0625388	165294
skeletal muscle tissue development	biological_process	13.91	5.55	0.00271959	0.00549063	0.00277104	0.173111	119811
lipid metabolic process	biological_process	114.85	32.35	0.022455	0.0320039	0.00954897	0.0833742	89154.3
ubiquitin thiolesterase activity	molecular_function	24.44	7.63	0.00477845	0.00754802	0.00276957	0.251417	81816.1
ribonucleoprotein complex	cellular_component	67.3	20.08	0.0131581	0.0198647	0.00670666	0.10846	33618.2
ion channel binding	molecular_function	18.44	6	0.00360528	0.00593568	0.0023304	0.268598	27943.7
ubiquitin-protein ligase activity	molecular_function	84.2	25.11	0.0164622	0.0248406	0.0083784	0.0817995	20716.2
meiosis	biological_process	12.61	5	0.00246543	0.0049464	0.00248097	0.181983	20675.1
multicellular organismal development	biological_process	244.81	60.2	0.0478634	0.0595541	0.0116907	0.134542	19893
actin filament binding	molecular_function	21.6	7	0.00422296	0.00692496	0.002702	0.209237	18836.5
protein phosphatase binding	molecular_function	19.04	6.52	0.00372261	0.00645013	0.00272752	0.242398	18106
endoplasmic reticulum-Golgi intermediate compartment	cellular_component	12.39	6.6	0.0024224	0.00652888	0.00410648	0.0478092	17445.7
microtubule	cellular_component	77.57	21.58	0.0151658	0.0213486	0.00618276	0.166674	14502.9
nucleolus	cellular_component	130.34	32.97	0.0254833	0.0326163	0.00713299	0.205778	13881.3
mesoderm formation	biological_process	8.9	5.06	0.00174018	0.00500566	0.00326547	0.0656029	13825.4
acid-amino acid ligase activity	molecular_function	13.96	5.58	0.00272937	0.00552011	0.00279074	0.164818	9346.3
Rho protein signal transduction	biological_process	12.97	6.25	0.00253586	0.00618305	0.00364719	0.0817969	5970.02
methylated histone residue binding	molecular_function	15.56	5	0.00304224	0.0049464	0.00190415	0.372878	3127.38
ATP binding	molecular_function	435.98	102.17	0.08524	0.101075	0.0158346	0.113557	3065.24
basolateral plasma membrane	cellular_component	37.06	11.76	0.00724566	0.0116339	0.00438824	0.174917	2619.32
transferase activity, transferring phosphorus-containing groups	molecular_function	167.74	43.66	0.0327956	0.0431916	0.010396	0.106185	1554.5
negative regulation of transcription from RNA polymerase II promoter	biological_process	170.78	44.66	0.0333898	0.0441806	0.0107908	0.0962204	953.146
positive regulation of protein kinase activity	biological_process	15.85	6.18	0.00309888	0.0061136	0.00301472	0.186154	829.145
peptidyl-serine phosphorylation	biological_process	25.03	10.68	0.00489385	0.0105657	0.00567186	0.0425768	591.969
liver development	biological_process	19.63	7.76	0.00383796	0.00767691	0.00383895	0.11905	376.092
positive regulation of fibroblast proliferation	biological_process	11	5.17	0.00215059	0.00511448	0.00296389	0.121636	371.117
dendritic spine	cellular_component	19.39	7.22	0.0037909	0.00714285	0.00335195	0.138966	248.143
ribosome biogenesis	biological_process	19.65	7	0.00384168	0.00692496	0.00308328	0.180292	174.405
cysteine-type peptidase activity	molecular_function	42.06	11.63	0.00822349	0.0115051	0.00328165	0.341219	151.73
negative regulation of epithelial cell proliferation	biological_process	13.72	6.21	0.00268248	0.00614356	0.00346108	0.111087	135.88
cell proliferation	biological_process	52.85	14.29	0.0103327	0.0141369	0.00380419	0.321018	101.318
protein ubiquitination	biological_process	57.98	17.22	0.0113359	0.0170354	0.00569954	0.154036	91.5953
transcription cofactor activity	molecular_function	11	5.82	0.00215058	0.0057576	0.00360702	0.0578344	64.9991
single-stranded DNA binding	molecular_function	14.1	5	0.00275673	0.0049464	0.00218967	0.225028	64.7839
cell adhesion	biological_process	134.46	32.19	0.0262888	0.0318451	0.0055563	0.347031	44.9789
transferase activity	molecular_function	427.54	98.95	0.0835907	0.0978897	0.0142991	0.122989	37.9749
forebrain development	biological_process	21.69	8.34	0.00424066	0.00825038	0.00400973	0.109859	34.1832
filopodium	cellular_component	15.55	5	0.00304013	0.0049464	0.00190627	0.3593	28.4832
protein homodimerization activity	molecular_function	178.73	42.98	0.0349444	0.0425196	0.00757528	0.254325	27.1346
transcription corepressor activity	molecular_function	37.68	12.03	0.0073667	0.0119011	0.00453435	0.162552	24.1886
skeletal muscle cell differentiation	biological_process	19.61	6	0.00383403	0.00593568	0.00210165	0.421957	23.7891
substrate adhesion-dependent cell spreading	biological_process	10.48	5.15	0.00204899	0.00509465	0.00304566	0.0940397	23.4524
focal adhesion	cellular_component	35.81	11.13	0.00700137	0.0110104	0.00400905	0.177634	20.7916
rRNA processing	biological_process	27.44	8	0.00536497	0.00791424	0.00254927	0.357499	17.036
peptide binding	molecular_function	22.51	7.71	0.00440104	0.00762733	0.00322629	0.219906	15.5271
microtubule binding	molecular_function	36.96	13	0.00722619	0.0128605	0.00563432	0.0778948	14.4223
RNA polymerase II core promoter proximal region sequence-specific DNA binding transcription factor activity involved in positive regulation of transcription	molecular_function	24.79	8.84	0.00484685	0.00874504	0.00389819	0.138833	11.6571
transforming growth factor beta receptor signaling pathway	biological_process	23.71	9	0.00463566	0.00890336	0.00426771	0.117208	10.9853
nuclear speck	cellular_component	22.62	9.81	0.00442251	0.00970481	0.0052823	0.0546207	10.6469
SMAD binding	molecular_function	16.76	6.13	0.00327679	0.00606419	0.0027874	0.212549	7.33398
cell cycle arrest	biological_process	24.45	7.59	0.00478026	0.00750868	0.00272842	0.310846	7.32628
phosphotransferase activity, alcohol group as acceptor	molecular_function	16.86	5	0.00329639	0.0049464	0.00165001	0.392717	4.33961
protein heterooligomerization	biological_process	25.35	8.17	0.00495632	0.00808245	0.00312613	0.232191	4.24294
patterning of blood vessels	biological_process	13.4	6.33	0.00261991	0.00626206	0.00364215	0.0932144	2.83912
translation initiation factor activity	molecular_function	16.1	5	0.00314782	0.0049464	0.00179858	0.37345	2.22997
endocytosis	biological_process	49.67	13.27	0.00971118	0.0131275	0.00341634	0.321796	2.09948
protein stabilization	biological_process	19.79	7.18	0.00386916	0.00710311	0.00323394	0.179625	1.82096
negative regulation of translation	biological_process	18.26	6.11	0.00357011	0.00604435	0.00247424	0.260359	1.7456
neuron projection	cellular_component	92.66	23.33	0.0181164	0.0230801	0.00496366	0.297855	1.47436
negative regulation of canonical Wnt receptor signaling pathway	biological_process	24.9	8.96	0.00486828	0.00886425	0.00399597	0.118416	1.36252
positive regulation of I-kappaB kinase/NF-kappaB cascade	biological_process	34.75	9.64	0.00679416	0.00953649	0.00274233	0.321323	1.23253
receptor binding	molecular_function	68.92	17.23	0.0134749	0.0170453	0.00357041	0.383937	0.918974
heparin binding	molecular_function	33.34	9	0.00651841	0.00890352	0.00238511	0.402944	0.89582
response to hypoxia	biological_process	34.66	9.67	0.00677646	0.00956632	0.00278986	0.32522	0.601757
zinc ion binding	molecular_function	315.93	70.96	0.0617686	0.0701993	0.00843077	0.291546	0.582487
protein K48-linked ubiquitination	biological_process	13.76	5.14	0.00269024	0.0050847	0.00239446	0.226207	0.577395
extracellular matrix organization	biological_process	26.64	7	0.00520859	0.00692496	0.00171637	0.488497	0.453551
osteoblast differentiation	biological_process	14.65	5.22	0.00286434	0.00516423	0.00229989	0.24214	0.410119
syntaxin binding	molecular_function	17.13	5.54	0.00334924	0.0054805	0.00213126	0.269685	0.259852
organ morphogenesis	biological_process	32.41	8.63	0.0063365	0.00853749	0.002201	0.410525	0.245079
positive regulation of gene expression	biological_process	54.73	15.33	0.0107003	0.0151655	0.00446526	0.2268	0.20352
positive regulation of cell migration	biological_process	41.62	11.42	0.00813733	0.0112974	0.0031601	0.341854	0.194844
sequence-specific DNA binding RNA polymerase II transcription factor activity	molecular_function	16.49	5.74	0.00322405	0.00567838	0.00245433	0.253123	0.182798
enzyme binding	molecular_function	81.07	20.17	0.0158501	0.0199535	0.00410342	0.343736	0.178897
positive regulation of apoptotic process	biological_process	85.08	21.74	0.0166343	0.0215069	0.00487262	0.292223	0.155773
cytoplasmic microtubule	cellular_component	11.63	5.22	0.00227379	0.00516395	0.00289015	0.125271	0.149665
transcription coactivator activity	molecular_function	43.66	12.23	0.00853606	0.0120993	0.00356327	0.287392	0.142736
transport	biological_process	469.36	101.22	0.0917662	0.100134	0.00836795	0.408986	0.136894
early endosome	cellular_component	39.31	10.61	0.00768567	0.010496	0.00281038	0.392625	0.127052
cytoskeleton organization	biological_process	25.97	8.43	0.00507761	0.00833976	0.00326215	0.219597	0.109784
SH3 domain binding	molecular_function	37.23	10.68	0.0072789	0.0105652	0.00328634	0.308017	0.096264
steroid metabolic process	biological_process	21.4	6	0.00418408	0.00593568	0.0017516	0.440092	0.0875131
central nervous system development	biological_process	14.98	5.81	0.00292883	0.0057478	0.00281897	0.180397	0.0853834
identical protein binding	molecular_function	121.1	28.67	0.0236772	0.0283626	0.00468546	0.365833	0.0806934
transferase activity, transferring acyl groups	molecular_function	47.51	12.86	0.00928889	0.0127225	0.00343361	0.30859	0.0790441
positive regulation of peptidyl-tyrosine phosphorylation	biological_process	22.61	6.67	0.00442057	0.00659838	0.00217781	0.334616	0.078686
cell morphogenesis	biological_process	17.57	5.55	0.00343513	0.00549054	0.00205541	0.373429	0.0766042
regulation of gene expression	biological_process	38.92	10.23	0.00760938	0.0101202	0.00251087	0.433898	0.0757659
protein autophosphorylation	biological_process	55.18	14.65	0.0107886	0.014493	0.0037044	0.33049	0.0725876
microtubule cytoskeleton organization	biological_process	16.64	5.92	0.00325331	0.00585636	0.00260306	0.242276	0.0701115
trans-Golgi network	cellular_component	39.62	10.14	0.00774629	0.0100311	0.00228483	0.449555	0.0693779
negative regulation of cell growth	biological_process	34.67	9.73	0.00677846	0.00962548	0.00284702	0.325119	0.0682202
endonuclease activity	molecular_function	16.87	5	0.00329828	0.0049464	0.00164812	0.392211	0.0641428
mRNA binding	molecular_function	17.9	5.59	0.0034997	0.00553002	0.00203032	0.358887	0.059141
lipid transport	biological_process	18.79	6.23	0.00367369	0.00616332	0.00248964	0.268046	0.0586411
response to oxidative stress	biological_process	31.03	8	0.0060669	0.00791424	0.00184734	0.514677	0.0489786
positive regulation of neuron differentiation	biological_process	16	5.83	0.00312806	0.00576734	0.00263928	0.241944	0.0486304
axon guidance	biological_process	34.5	9.41	0.00674508	0.00930944	0.00256436	0.402481	0.0469784
camera-type eye development	biological_process	15.88	5.16	0.0031048	0.0051046	0.0019998	0.358639	0.046344
Wnt receptor signaling pathway	biological_process	65.34	16.63	0.0127748	0.0164518	0.00367706	0.35167	0.0291633
secretory granule	cellular_component	19.3	5.59	0.00377347	0.00552991	0.00175645	0.432805	0.0274293
magnesium ion binding	molecular_function	48.78	12.5	0.00953726	0.0123658	0.0028285	0.392315	0.0266441
double-stranded DNA binding	molecular_function	39.96	11.01	0.00781287	0.0108916	0.00307876	0.345594	0.0260157
microtubule-based movement	biological_process	16.96	5.28	0.00331588	0.00522325	0.00190737	0.37356	0.0248181
growth cone	cellular_component	27.81	7.85	0.00543717	0.0077658	0.00232863	0.357869	0.0218318
intracellular signal transduction	biological_process	76.46	18.11	0.0149487	0.0179161	0.00296737	0.485694	0.0207309
external side of plasma membrane	cellular_component	46.17	11.31	0.00902682	0.0111885	0.00216172	0.483003	0.0198426
positive regulation of protein kinase B signaling cascade	biological_process	18.36	5.85	0.00358958	0.00578702	0.00219743	0.298878	0.019292
lysosome	cellular_component	86.78	19.69	0.0169665	0.0194789	0.00251237	0.600218	0.0189421
protein tyrosine kinase activity	molecular_function	41.85	10.63	0.00818237	0.0105161	0.00233369	0.457713	0.018068
insulin receptor signaling pathway	biological_process	18.69	5.59	0.00365418	0.00552997	0.00187579	0.407411	0.0176839
regulation of cell shape	biological_process	28.87	7.6	0.00564453	0.00751841	0.00187389	0.508214	0.016956
cytoplasmic vesicle	cellular_component	138.59	30.17	0.0270963	0.0298463	0.00274996	0.605486	0.0152617
nuclear matrix	cellular_component	21.38	6.11	0.00418018	0.00604448	0.0018643	0.422986	0.0149673
regulation of apoptotic process	biological_process	59.24	14.05	0.0115823	0.0138994	0.00231711	0.528215	0.0134652
negative regulation of sequence-specific DNA binding transcription factor activity	biological_process	17.89	5.18	0.0034976	0.00512443	0.00162684	0.392176	0.0129997
membrane	cellular_component	1612.65	319.01	0.315295	0.31559	0.000294728	0.853653	0.01196
neuronal cell body	cellular_component	101.24	22.37	0.0197937	0.0221301	0.00233646	0.628254	0.0115307
synaptic transmission	biological_process	21.49	5.63	0.00420157	0.00556955	0.00136797	0.5913	0.0110455
protein transporter activity	molecular_function	19.15	5	0.00374418	0.0049464	0.00120222	0.579873	0.00974297
signal transduction	biological_process	261.72	53.74	0.0511698	0.053164	0.00199416	0.750706	0.00947639
cell projection	cellular_component	134.88	28.75	0.0263704	0.0284418	0.00207136	0.677998	0.00859511
late endosome	cellular_component	26.12	6.73	0.00510679	0.00665797	0.00155118	0.494323	0.00827136
negative regulation of transcription, DNA-dependent	biological_process	140.98	29.51	0.0275632	0.0291932	0.00162997	0.752094	0.00803438
cholesterol metabolic process	biological_process	25.23	6.48	0.00493292	0.00641053	0.00147761	0.495233	0.00788431
kidney development	biological_process	26.93	6.82	0.00526513	0.00674685	0.00148172	0.50115	0.00734891
DNA replication	biological_process	38.15	9.12	0.00745898	0.00902207	0.00156309	0.558114	0.00692833
collagen	cellular_component	19.71	5	0.00385368	0.0049464	0.00109272	0.591661	0.00661471
cell junction	cellular_component	163.07	33.5	0.0318825	0.0331407	0.00125823	0.773101	0.00647005
intracellular membrane-bounded organelle	cellular_component	165.75	33.89	0.0324069	0.0335263	0.00111942	0.846098	0.00615839
protein N-terminus binding	molecular_function	36.23	8.55	0.00708332	0.00845841	0.0013751	0.554079	0.00592356
helicase activity	molecular_function	41.73	9.62	0.00815885	0.00951678	0.00135793	0.580313	0.00586629
peptidyl-tyrosine phosphorylation	biological_process	20.37	5.06	0.0039826	0.00500588	0.00102328	0.604215	0.00581351
nuclear membrane	cellular_component	30.31	7.23	0.00592605	0.00715259	0.00122654	0.651339	0.00579076
phosphoprotein binding	molecular_function	18.18	5.15	0.00355445	0.00509472	0.00154027	0.530418	0.00571697
oxidation-reduction process	biological_process	177.79	35.75	0.0347601	0.0353668	0.000606699	0.85169	0.00567707
lipid binding	molecular_function	53.34	11.47	0.0104288	0.0113475	0.000918656	0.738311	0.00563776
activation of MAPK activity	biological_process	20.33	5.22	0.00397478	0.00516389	0.00118911	0.59038	0.00557049
signal transducer activity	molecular_function	122.52	25.77	0.0239543	0.0254937	0.00153936	0.821146	0.00556073
intracellular protein kinase cascade	biological_process	25.26	6.15	0.00493874	0.006084	0.00114526	0.627782	0.00531187
negative regulation of catalytic activity	biological_process	19.79	5.1	0.00386932	0.00504535	0.00117603	0.590979	0.005304
phospholipid biosynthetic process	biological_process	21.32	5.31	0.00416836	0.00525305	0.00108469	0.604623	0.00514444
peptidase activity	molecular_function	122.92	25.25	0.0240329	0.024979	0.0009461	0.823957	0.00494597
brain development	biological_process	35.99	8.22	0.00703652	0.00813166	0.00109514	0.686627	0.00486055
regulation of growth	biological_process	24.06	5.83	0.00470404	0.00576738	0.00106334	0.620009	0.00468274
pattern specification process	biological_process	21.76	5.32	0.00425439	0.00526278	0.0010084	0.597943	0.00458561
proteolysis	biological_process	131.3	26.25	0.0256712	0.0259683	0.000297063	0.834068	0.00450907
palate development	biological_process	22.48	5.44	0.00439517	0.00538138	0.00098621	0.620696	0.00444262
calcium ion binding	molecular_function	145.22	29.2	0.0283925	0.0288871	0.000494579	0.839562	0.004366
PDZ domain binding	molecular_function	36.11	7.75	0.00706001	0.00766696	0.000606944	0.83102	0.00432943
anterior/posterior pattern specification	biological_process	28.78	6.53	0.00562691	0.00645991	0.000833008	0.665573	0.00414638
spermatogenesis	biological_process	51.9	10.9	0.0101473	0.0107832	0.000635946	0.857295	0.00383347
electron transport chain	biological_process	21.53	5.19	0.00420927	0.005134	0.000924726	0.616992	0.00382329
positive regulation of angiogenesis	biological_process	23.89	5.64	0.00467085	0.0055796	0.000908756	0.638448	0.00366758
lamellipodium	cellular_component	36.25	7.73	0.00708735	0.00764711	0.00055976	0.835832	0.00342957
proteasomal ubiquitin-dependent protein catabolic process	biological_process	21.67	5.18	0.0042367	0.00512435	0.000887657	0.628562	0.00338572
metallopeptidase activity	molecular_function	39.95	8.62	0.00781079	0.00852748	0.000716681	0.840896	0.00337241
cartilage development	biological_process	25.81	5.82	0.00504612	0.00575746	0.000711339	0.651081	0.00336379
calmodulin binding	molecular_function	43.34	9.08	0.00847335	0.00898267	0.000509323	0.850308	0.00334517
lung development	biological_process	33.98	7.33	0.00664354	0.00725128	0.000607742	0.828121	0.00331382
protein localization	biological_process	23.26	5.11	0.00454761	0.00505518	0.000507572	0.794108	0.0032914
apical part of cell	cellular_component	36.06	8	0.00705035	0.00791424	0.000863885	0.686196	0.00326768
symporter activity	molecular_function	26.98	5.66	0.00527503	0.00559923	0.000324198	0.809378	0.00312511
fatty acid biosynthetic process	biological_process	24.27	5.24	0.00474509	0.00518395	0.000438853	0.799156	0.00306017
microtubule cytoskeleton	cellular_component	34.19	7.29	0.00668451	0.00721186	0.000527359	0.832673	0.00297896
axonogenesis	biological_process	28.42	5.79	0.00555648	0.00572804	0.000171564	0.821923	0.00286997
tight junction	cellular_component	27.43	5.76	0.00536289	0.00569819	0.000335301	0.817401	0.00276309
postsynaptic density	cellular_component	35.51	7.17	0.00694271	0.00709335	0.000150636	0.838808	0.00265506
cell-cell adhesion	biological_process	29.65	6.58	0.00579699	0.0065096	0.000712611	0.815104	0.00254129
ATP catabolic process	biological_process	28.18	6	0.00550966	0.00593568	0.000426015	0.817422	0.00239285
nuclease activity	molecular_function	28.04	6	0.00548219	0.00593568	0.000453491	0.817243	0.00228762
negative regulation of gene expression	biological_process	31.95	6.69	0.00624658	0.00661818	0.000371601	0.831151	0.00228088
cytokine-mediated signaling pathway	biological_process	24.16	5	0.00472364	0.0049464	0.000222755	0.805642	0.00175082
anchored to membrane	cellular_component	24.01	5	0.00469429	0.0049464	0.000252106	0.805646	0.00155357
