# Supplementary material for: Antagonistic regulation of mRNA expression and splicing by CELF and MBNL proteins
Source: Genome Res. 2015 Jun;25(6):858–71. doi: 10.1101/gr.184390.114 (PMC4448682; doi:10.1101/gr.184390.114)
Supplement: Supplemental Material [file supp_gr.184390.114_Table_S6.xlsx]

## Sheet: CELF1 heart
Table S6. Gene expression changes in response to CELF induction.
CELF1 induction in heart
#Gene	Celf1heart_12h_091210_A3258	Celf1heart_12h_091228_A3252	Celf1heart_12h_100122_A3276	Celf1heart_24h_100309_A3254	Celf1heart_24h_100309_A3277	Celf1heart_24h_100421_A3262	Celf1heart_24h_100510_A3262	Celf1heart_72h_091121_A3278	Celf1heart_72h_100115_A3264	Celf1heart_72h_100115_A3281	Celf1heart_72h_100122_A3264	Celf1heart_72h_100911_A3281	Celf1heart_7dy_091210_A3345	Celf1heart_7dy_100115_A3283	Celf1heart_7dy_100122_A3269	Celf1heart_7dy_100122_A3283	Celf1heart_7dy_100911_A3345	Celf1heart_ctl_091121_A3250	Celf1heart_ctl_091121_A3259	Celf1heart_ctl_091121_A3280	Symbol	Desc
100009600	0	0.09	0.1	0.04	0.25	0.18	0.14	0.56	0	0.09	0	0.07	0.11	0.4	0.05	0.25	0.12	0.36	0.33	0.07	Glp1	GATA like protein-1
100017	4.74	8.85	3.23	7.66	9.5	3.12	5.31	14.8	8.79	8.41	9	7.42	10.81	12.28	9.25	6.38	9.98	8.36	8.03	9.56	Ldlrap1	low density lipoprotein receptor adaptor protein
100019	1.07	2.02	1.29	1.47	1.82	1.78	1.71	1.66	1.5	1.53	1.53	1.62	1.53	1.96	1.13	1.62	1.72	1.12	1.19	1.17	Mdn1	midasin
100034251	9.91	9.77	8.64	9.39	9.35	4.47	6.49	8.78	8.21	9.7	10.84	8.87	163.5	85.6	138.65	151.37	173.56	9.58	9.83	8.67	OTTMUSG00000000971	extracellular proteinase inhibitor family
100034361	61.31	65.44	41.71	96	128.62	121.97	125.85	100	113.12	125.54	73.68	123.36	45.78	92.79	52.64	54.52	45.69	72.73	77.89	70.98	Mfap1b	microfibrillar-associated protein 1B
100034684	0	0	0	0	0	0	0	0	0	0	0	0	0	0	0.78	0.2	0.2	0	0	0	BC100530	stefin A-like protein
100034729	0	0	0	0.07	0	0	0.04	0	0	0	0	0	0	0.14	0	0	0.09	0	0	0.04	LOC100034729	hypothetical protein LOC100034729,hypothetical protein LOC100034729,
100036518	0.03	0	0	0	0	0	0	0	0	0	0	0	0	0	0	0	0	0	0	0	OTTMUSG00000000541	predicted gene, OTTMUSG00000000541
100037258	10.34	14.78	9.15	16.16	14.9	9.61	8.92	22.6	29.06	28.95	22.99	29.33	43.05	63.25	27.34	53.52	41.09	17.45	14.38	13.4	Dnajc3a	DnaJ (Hsp40) homolog, subfamily C, member 3B
100037282	51.4	48.61	30.89	55.49	61.44	37.55	34.61	70.15	55	65.19	42.62	59.27	39.3	46.34	34.96	39.6	33.64	68.2	63.19	61.51	Rshl2b	radial spokehead-like 2B
100038859	0.28	0.19	0.07	0.16	0.06	0.09	0	0	0.05	0	0	0.09	0	0	0	0.09	0.06	0	0.05	0	Olfr55	olfactory receptor 55
100038875	294.33	261.77	253.51	186.12	174.79	169.66	158.26	189.74	156.23	167.81	286.88	185.6	541.62	245.37	363.46	489.11	524.99	152.65	159.41	145.92	n/a	n/a
100038941	0	0	0	0	0	0	0	0	0	0	0	0	0	0	0	0.03	0	0	0	0.02	EG625699	vomeronasal receptor Vmn2r121,vomeronasal receptor Vmn2r121,
100038977	0	0	0	0.04	0	0	0.03	0	0	0	0	0	0	0	0	0	0	0	0	0	LOC100038977	hypothetical protein LOC100038977,hypothetical protein LOC100038977,
100038993	34.93	37.67	22.89	30.75	28.05	22.45	26.18	58.31	54.87	53.71	24.84	47.7	22.8	46.04	21.05	25.79	17.25	45.98	74.2	77.17	n/a	n/a
100039065	0	0	0	0	0	0	0.06	0	0	0	0	0	0	0	0	0	0	0	0	0	LOC100039065	hypothetical protein LOC100039065
100039672	5.17	11.65	8.54	10.12	13.63	8	7.72	15.43	8.39	13.22	8.87	12.63	14.07	12.79	8.33	15.35	9.19	14.8	12.43	15.15	LOC100039672	hypothetical protein LOC100039672
100039781	4.11	1.78	2.83	6.33	4.1	3.29	4	7.64	2.72	3.73	4.87	2.96	14.32	13.32	7.9	13.24	10.88	7.01	4.52	5.65	3830408D24Rik	hypothetical protein LOC100039781
100039913	0.15	0	0	0	0	0	0	0	0	0	0	0	0	0	0	0	0	0	0	0	LOC100039913	hypothetical protein LOC100039913
100039948	0.15	0	0	0	0	0	0	0	0	0	0	0	0	0	0	0	0	0	0	0	LOC100039948	hypothetical protein LOC100039948
100039968	0.64	1.17	0.98	0.64	0.74	0.8	0.65	0.51	0.27	0	0	0.42	0.5	0.14	0.51	0.22	0.96	1.3	1.2	0.52	LOC100039968	hypothetical protein LOC100039968
100040233	0	0	0	0	0.05	0	0	0.08	0	0	0	0	0	0	0	0	0	0	0	0	LOC100040233	similar to trypsinogen 15
100040606	0	0	0	0	0	0.04	0.03	0	0	0	0	0	0.1	0	0	0	0.06	0	0	0	LOC100040606	hypothetical protein LOC100040606
100040843	0.09	0.1	0.14	0.07	0.02	0.05	0.2	0.2	0	0.05	0.1	0.17	0.37	0.18	0.37	0.31	0.4	0.03	0.11	0.08	Cyp4a32	cytochrome P450, family 4, subfamily a,
100041379	0.37	0.58	0.88	1.19	1.3	0.66	0.51	0.47	0.9	0.9	0.5	1.02	0.5	0.97	1.14	1.14	1.06	0.55	0.05	0.3	OTTMUSG00000011070	hypothetical protein LOC100041379
100041581	0	0.09	0.12	0.05	0	0.04	0	0.04	0	0	0	0.04	0.02	0	0	0	0.06	0.04	0	0	LOC100041581	similar to novel zinc finger protein (probable
100041724	0	0	0.09	0.08	0	0.08	0.28	0	0	0.18	0	0	1.58	1.06	0	0.12	0.74	0	0	0	LOC100041724	hypothetical protein LOC100041724
100042109	0	0	0	0.06	0	0	0.13	0	0	0	0	0.06	0	0	0	0.11	0	0	0	0	LOC100042109	hypothetical protein LOC100042109,hypothetical protein LOC100042109,hypothetical protein LOC100042109,hypothetical protein LOC100042109,hypothetical protein LOC100042109,
100042175	0	0	0	0.01	0	0	0.02	0	0	0	0	0.01	0	0	0	0	0	0	0	0	LOC100042175	hypothetical protein LOC100042175,hypothetical protein LOC100042175,hypothetical protein LOC100042175,hypothetical protein LOC100042175,
100042254	0	0	0	0	0	0.03	0.02	0	0	0	0	0	0.04	0	0	0	0.03	0	0	0	LOC100042254	hypothetical protein LOC100042254,hypothetical protein LOC100042254,hypothetical protein LOC100042254,
100042499	0.32	0.59	2.49	2.13	1.73	0.97	3.15	0.49	2.11	3.86	1.73	5.07	0.43	2.63	0.69	0.68	0.91	0.68	0.56	0.37	Vmn2r55	vomeronasal receptor Vmn2r55
100043108	0	0	0	0	0	0	0	0	0	0	0	0	0	0.3	0	0	0	0	0	0	Cyp2c69	cytochrome P450, family 2, subfamily c,
100043123	0.08	0.73	0.15	0.27	0.5	0.44	0.15	0.74	0.16	0.34	0.45	0.04	2.14	1.04	3.21	0.78	2.32	0.22	0.38	0.19	n/a	n/a
100043216	0	0	0	0	0	0	0.06	0	0	0	0	0	0	0	0	0	0	0	0	0	LOC100043216	hypothetical protein LOC100043216
100043381	3.31	4.16	8.08	13.64	7.03	10.25	9.73	2.63	13.96	9.86	7.56	14.58	6.06	9.72	12.33	9.35	10.93	3.2	3.05	2.15	LOC100043381	hypothetical protein LOC100043381,hypothetical protein LOC100043381,hypothetical protein LOC100043381,hypothetical protein LOC100043381,hypothetical protein LOC100043381,hypothetical protein LOC100043381,hypothetical protein LOC100043381,hypothetical protein LOC100043381,
100043387	3.3	3.98	7.29	12.38	6.79	8.87	8.75	2.23	12.08	8.93	7.16	13.34	5.47	9.69	10.71	9.09	10.19	2.99	2.97	2.17	LOC100043387	similar to novel KRAB box and zinc finger, C2H2,similar to novel KRAB box and zinc finger, C2H2,
100043757	0	0.03	0.03	0.01	0.03	0.01	0	0	0	0	0.07	0	0.01	0.02	0.01	0.03	0.03	0.02	0.02	0.02	Rp23-45p4.1	hypothetical protein LOC100043757
100043899	0	0	0	0	0	0	0	0	0	0	0	0	0	0	0	0	0.06	0	0	0	LOC100043899	hypothetical protein LOC100043899
100061	0	0	0	0.05	0	0.03	0.07	0	0	0	0	0.04	0	0	0	0	0	0	0	0	Lrrc19	leucine rich repeat containing 19,leucine rich repeat containing 19,
100066	0	0	0	0	0	0	0	0	0	0.05	0	0.04	0	0	0	0	0	0	0	0	Cyp2j11	cytochrome P450, family 2, subfamily j,
100072	5.08	7.93	5.54	9.48	11.3	6.46	6.83	7.77	5.91	7.11	5.98	5.52	11.71	12.72	8.1	8.67	8.98	8.97	7.5	10.07	n/a	n/a
100087	6.22	5.3	4.97	7	9.75	3.85	5.56	15.54	6.75	7.48	5.81	5.88	8.75	5.65	2.57	4.7	5.55	8.8	11.06	12.74	Kti12	KTI12 homolog, chromatin associated
100088	3.02	2.88	1.95	4.21	4.81	3	3.27	12.5	6.16	7.12	7.63	5.46	4.59	5.75	3.01	5.74	3.73	4.11	3.59	4.69	Rcc1	regulator of chromosome condensation 1,regulator of chromosome condensation 1,
100090	1.82	1.85	1.35	1.86	1.64	0.95	1.33	4.9	2.48	2.25	2.56	2.09	2.53	2.64	0.82	1.78	1.48	2.53	2.43	2.87	Zbtb48	GLI-Kruppel family member HKR3
100101806	64.06	60.29	53.94	145.36	121.59	145.79	137.83	72.35	163.46	170.21	70.95	205.96	62.73	236.95	111.22	182.32	96.69	95.96	96.69	69.8	Srp54c	signal recognition particle 54C,signal recognition particle 54C,
100102	0	0	0	0	0.05	0	0	0	0.06	0	0	0	0.02	0	0	0.02	0	0	0	0	Pcsk9	proprotein convertase subtilisin/kexin type 9
100113398	0.41	0.17	0.4	0.58	0.68	0.19	0.22	2	0.6	1.31	0.61	0.35	1.3	0.83	0.52	0.61	0.55	0.78	0.98	1.02	Adat3	tRNA-specific adenosine deaminase 3
100121	4.48	5.91	4	5.6	4.87	3.8	4	8.02	5.82	7.67	6.95	7.2	8.48	8.09	9.47	8.84	8.09	4.96	6.08	4.87	Tdrd7	tudor domain containing 7,tudor domain containing 7,tudor domain containing 7,
100125586	0	0	0	0	0	0	0	0	0	0	0	0	0.04	0.13	0.12	0.15	0.03	0	0	0	Vmn2r2	vomeronasal receptor Vmn2r2
100129	1.93	3.59	3.07	2.79	4.41	1.8	2.24	8.63	5.13	3.73	3.34	2.76	10.77	11.24	5	6.65	8.49	4.89	6.46	4.97	Gpr153	G protein-coupled receptor 153
100163	2.64	5.09	3.53	3.55	3.91	5.96	6.68	7.79	4.01	4.78	4.15	4.62	1.98	2.42	0.97	1.79	1.75	3.52	3.29	5.03	Pafah2	platelet-activating factor acetylhydrolase 2,platelet-activating factor acetylhydrolase 2,platelet-activating factor acetylhydrolase 2,
100169	6.77	9.08	5.62	9.68	13.34	7.14	6.97	15.15	13.45	12.3	11.36	12.19	13.92	13.37	9.13	10.37	12.27	10.62	13.12	10.55	Phactr4	phosphatase and actin regulator 4,phosphatase and actin regulator 4,
100177	3.53	2.89	3.46	4.09	3.21	2.98	2.88	2.93	3.26	3.16	3.06	4.19	3.43	2.87	3.42	3.03	4.31	2.99	3.25	2.54	Zmym6	zinc finger, MYM-type 6,zinc finger, MYM-type 6,zinc finger, MYM-type 6,
100182	1.32	1.79	1.08	1.32	1.75	0.77	0.97	2.88	2.09	1.95	1.75	1.46	4.36	4.23	4.22	2.58	3.43	2.41	2.36	2.51	Akna	AT-hook transcription factor,AT-hook transcription factor,AT-hook transcription factor,
100198	3.82	6.99	4.98	8.3	5.74	3.42	3.79	8.57	8.75	6.64	5.48	5.82	17.7	15.46	8.62	7.76	13.37	11.07	11.58	12.97	H6pd	hexose-6-phosphate dehydrogenase (glucose,hexose-6-phosphate dehydrogenase (glucose,
100201	5.7	7.55	6.36	10.37	17.33	5.45	9.19	9.93	7.57	6.39	3.73	5.1	6.79	6.64	9.09	3.01	5.63	8.27	10.36	11.89	Tmem64	transmembrane protein 64
100206	6.11	5.29	5.03	6.08	6.31	5	4.45	14.44	8.63	9.22	9.06	7.61	8.52	6.28	4.7	5.4	6.14	5.12	7.24	8.57	Adprhl2	ecto ADP-ribosylhydrolase
100210	4.42	2.54	3.51	4.13	6.29	2.08	3.03	7.29	4.61	4.58	4.2	3.11	6.4	8.93	2.68	4.03	6.07	5.75	6.54	6.18	Atpbd1b	ATP binding domain 1 family, member B
100213	9.43	8.22	8.97	14.64	12.85	6.95	9.09	25.61	16.91	16.59	17.79	11.87	14.32	15.35	11.93	10.04	11.33	16.89	19.67	21.6	Rusc2	RUN and SH3 domain containing 2
100226	20.7	24.78	17.28	23.88	22.5	12.81	11.85	26.68	18.7	16.79	16.88	17.35	35.45	28	26.37	37.55	30.9	28.83	33.65	31.42	Stx12	syntaxin 12,syntaxin 12,
100273	32.06	36.58	32.68	44.61	45.82	42.33	38.36	34.82	37.88	33.91	31.64	38.47	55.12	64.63	55.35	60.23	59.14	44.6	42.77	38.42	Osbpl9	oxysterol binding protein-like 9 isoform a,oxysterol binding protein-like 9 isoform a,
100317	10.61	13.94	11.15	12.36	11.95	12.49	13.82	13.21	12	10.62	11.01	9.5	12.26	11.39	8.19	7.25	10.08	15.74	17.41	18.92	AU040320	polycystic kidney disease 1-like isoform 2
100336	9.21	11.42	7.51	10.01	8.16	4.95	6.33	16.4	11.58	11.55	8.66	11.07	9.14	12.45	7.75	6.49	7.04	12.47	12.28	12.66	Ppp1r8	protein phosphatase 1, regulatory (inhibitor)
100340	0.23	0.16	0.14	0.41	0.38	0.35	0.29	0.81	0.39	0.48	0.36	0.54	0.67	1	1.81	1.49	0.7	0.34	0.54	0.58	Smpdl3b	sphingomyelin phosphodiesterase, acid-like 3B
100342	0.97	0.72	1.63	4.26	4.82	2.14	2.32	5.13	5.25	2.1	1.6	1.52	22.34	17.17	15.26	8.48	17.69	5.95	4.67	4	4732473B16Rik	hypothetical protein LOC100342
100383	18	18.32	16.75	22.04	26.49	15.27	16.48	49.87	36.44	47.28	39.21	40.74	18.46	23.34	15.91	18.65	16.42	20.33	23.87	27.3	Bsdc1	BSD domain containing 1
100434	9.51	13.57	10.35	11.01	10.74	12.78	9.82	8.73	12.01	7.49	9.44	8.05	16.33	16	18.11	18.42	17.75	16.02	16.58	11.83	Slc44a1	solute carrier family 44, member 1,solute carrier family 44, member 1,solute carrier family 44, member 1,
100465	1.5	2.54	0.67	1.69	2.19	2.01	2.47	3.53	3.34	1.89	2.53	1.59	3.52	3.7	1.28	1.69	3.54	1.91	4.23	2.12	Mobkl2c	MOB1, Mps One Binder kinase activator-like 2C
100470	0	0	0.02	0	0.02	0	0	0	0	0	0	0	0.1	0	0	0.17	0.08	0.03	0	0	Lao1	L-amino acid oxidase 1
100494	6.87	6.81	4.76	7.57	7.29	12.1	9.93	17	12.35	19.22	11.93	18.93	16.41	25.72	20.05	19.64	14.85	6.83	5.77	8.87	Zfand2a	zinc finger, AN1-type domain 2A,zinc finger, AN1-type domain 2A,
100515	1.03	1.71	1.04	1.17	1.25	0.69	0.68	0.97	0.84	0.7	1.11	0.85	1.68	1.99	2.11	1.71	1.58	1.53	1.03	1.68	6820424L24Rik	hypothetical protein LOC100515
100532	2.93	6.02	2.59	5.48	5.74	4.77	5.04	4.79	4.73	5.13	3.76	4.03	8.59	19.04	10.56	10.54	7.64	4.82	4.99	4.8	Rell1	RELT-like 1
100535	0	0	0.1	0	0	0	0	0	0	0	0	0.02	0.12	0.06	0	0	0.08	0	0.05	0.05	Oas1d	2'-5' oligoadenylate synthetase 1D
100554	0	0	0	0	0	0	0	0	0	0	0	0	0	0	0	0	0.05	0	0	0	AA792892	hypothetical protein LOC100554,hypothetical protein LOC100554,
100561	3	3.75	3	3.69	4.39	2.85	2.8	7	4.97	5.04	5.69	4.66	7.29	7.3	6.18	4.26	5.75	5.88	6.08	6.08	Slc15a4	solute carrier family 15, member 4
100604	4.13	8.43	4.57	6.02	5.32	5.57	6.33	8.26	6.85	6.17	5.32	6.24	7.75	10.73	10.8	8.47	8.46	7.84	6.46	6.59	Lrrc8c	AD158
100608	4.45	6.64	4.52	4.35	4.66	2.48	3.52	6.37	4.42	3.72	4.57	3.87	7.36	11.69	6.5	8.63	6.4	5.94	6.21	6.19	Noc4l	nucleolar complex associated 4 homolog
100609	5.05	6.33	3.66	4.62	6.37	4.57	6	9.32	4.82	6.51	7.07	5.14	5.98	6.84	4.39	4.72	4.13	5.17	8.43	6.66	Nsun5	NOL1/NOP2/Sun domain family, member 5
100637	0.71	1.5	1.14	0.91	0.95	0.56	0.5	0.73	0.43	0.75	1.57	0.39	2.56	3.12	3.16	0.86	2.44	0.83	0.77	0.75	B230342M21Rik	hypothetical protein LOC100637,hypothetical protein LOC100637,
100647	0	0	0	0.16	0	0	0.07	0.57	0	0.19	0	0	0.22	0	0	0	0.03	0	0	0.07	Upk3b	uroplakin 3B
100678	7.23	6.37	4.61	6.44	3.24	3.14	4.56	3.69	4.5	4.03	4.47	4.75	5.51	4.75	5.8	6.15	6.8	5.08	6.71	7.07	Psph	phosphoserine phosphatase
100683	4.05	6.29	5.18	7.23	6.96	5.47	5.68	10.3	7.38	7.68	6.1	7.03	6.49	6.12	5.76	4.96	5.34	7.81	8.77	8.71	Trrap	transformation/transcription domain-associated,transformation/transcription domain-associated,
100689	3.08	8.9	3.52	0.12	0.19	0.24	0.19	0.86	0.23	0.28	0.47	0.08	1.95	0.67	0.83	0.28	1.27	0.28	0.46	0.33	Spon2	spondin 2, extracellular matrix protein
100702	9.98	13.17	7.64	16.48	32.88	14.27	14.39	21.05	20.81	15.92	6.47	14.63	3.38	8.14	4.13	2.79	3.55	22.88	16.74	12.33	Mpa2l	macrophage activation 2 like
100705	32.61	44.03	38.16	45.64	42.47	39.04	40.16	37.15	38.95	29.18	27.59	27.03	13.81	13.95	9.16	7.13	11.63	61.16	63.18	67.63	Acacb	acetyl-Coenzyme A carboxylase beta,acetyl-Coenzyme A carboxylase beta,
100710	4.41	7	5.27	5.92	5.22	4.67	4.98	4.14	6.47	5.31	5.8	5.82	5.18	5.95	6.29	5.66	6.73	5.8	5.09	5.03	Pds5b	PDS5, regulator of cohesion maintenance, homolog,PDS5, regulator of cohesion maintenance, homolog,PDS5, regulator of cohesion maintenance, homolog,
100715	4.86	3.98	5.38	5.02	5.47	6.03	4.76	5.82	9.69	10.19	7.56	10.14	9.51	11.29	19.37	20.36	16.43	4.01	3.28	2.57	Papd4	PAP associated domain containing 4,PAP associated domain containing 4,
100732	26.18	31.59	24.99	30.92	25.34	9.14	9	52.38	35.55	49.75	48.97	49.23	34.63	41.85	25.36	40.99	29.83	31.7	37.53	33.48	Mapre3	APC-binding protein EB2
100737	2.72	3.35	3.44	4.85	4.51	4.34	4.1	4.12	3.65	2.98	3.15	3.48	4.19	3.26	5.27	6.75	4.04	4.18	4.13	3.39	Dcun1d4	DCN1, defective in cullin neddylation 1, domain,DCN1, defective in cullin neddylation 1, domain,
100756	3.92	3.5	3.6	3.88	4.39	4.01	3.82	7.2	6.36	5.89	4.83	5.29	6.52	7.61	4.03	5.81	4.51	4.93	4.55	5.24	Usp30	ubiquitin specific peptidase 30
100763	10.42	13.97	12.74	12.57	12.68	8.1	8.81	13.62	13.43	11.37	11.86	12.8	12.74	15.7	14.79	16.11	14.96	14.6	15.85	14.57	Ube3c	ubiquitin protein ligase E3C,ubiquitin protein ligase E3C,
100764	4.61	3.11	4.42	3.26	1.71	2.32	2.46	6.38	2.8	2.76	4.09	1.53	2.65	3.02	2.3	2.18	1.96	4.18	5	6.38	1110008J03Rik	hypothetical protein LOC100764
100855	2.69	6	2.64	4.18	6.14	3.53	3.99	6.57	5.14	2.78	2	4.8	8.23	7.11	9.25	7.52	8.78	4.36	4.93	6.06	Tbc1d14	TBC1 domain family, member 14,TBC1 domain family, member 14,TBC1 domain family, member 14,TBC1 domain family, member 14,TBC1 domain family, member 14,
100900	12.31	8	7.25	9.06	10.06	7.72	14.04	11.07	8.2	9.82	10.73	8.78	5.67	3.82	4.17	4.06	6.43	9.5	12.54	9.64	Hscb	J-type co-chaperone HSC20
100929	2.1	2.41	2.94	2.83	4.88	2.7	2.55	5.44	3.11	4.3	2.51	3.44	4.9	4.31	2.88	4.39	3.41	4.59	4.62	3.84	Tyw1	radical S-adenosyl methionine and flavodoxin
100952	9.65	8.68	7.87	7.59	12.17	6.6	7.77	19.39	10.89	10.3	10.71	8.2	60.58	40.95	26.52	32	44.13	8.09	9.88	10.58	Emilin1	elastin microfibril interfacer 1
100972	43.04	35.96	48.26	63.48	56.38	76.96	62.6	26.66	39.24	47.41	36.02	56.17	27.56	38.76	28.65	43.37	36.63	30.64	32.95	27.8	Rab28	RAB28, member RAS oncogene family,RAB28, member RAS oncogene family,
100978	1.05	2.59	2.02	1.92	1.42	1.01	1.18	1.59	1.58	1.45	1.24	2.01	2.75	4.05	3.46	4.08	3.43	1.77	1.69	1.55	Nfxl1	ovarian zinc finger protein,ovarian zinc finger protein,
100986	8.23	11.11	8.09	12.54	9.35	11.6	11.53	7.6	9.26	11.38	9.44	12.79	7.37	7.28	7.01	6.16	7.63	9.49	8.2	9.89	Akap9	A kinase (PRKA) anchor protein (yotiao) 9
101023	3.75	2.86	4.18	5.34	7.67	2.62	3.21	9.89	6.11	9.03	6.06	7.51	6.33	8.54	3.42	3.54	4.85	5.26	6.88	6.89	Zfp513	zinc finger protein 513
101095	1.93	2.06	1.46	2.3	3.78	2.98	2.47	3.75	2.11	3.53	3.25	2.41	2.92	3.3	1.65	2.02	2.28	3.04	3.05	4.13	Zfp282	zinc finger protein 282
101100	0	0.4	0.11	0.34	0.98	0.57	0.47	1.37	0.65	0	0.93	0.5	0.12	1.03	0	0.4	0.13	0.52	0.29	0.31	Ttll3	tubulin tyrosine ligase-like family, member 3
101113	13.28	6.73	9.96	11.21	8.28	5.25	9.18	21.62	15.26	13.6	9.63	11.26	11.62	9.58	4.99	6.66	7.25	18.56	18.44	23.08	Snx21	sorting nexin family member 21,sorting nexin family member 21,
101118	5.06	4.29	4.95	6.29	8.3	5.75	5.74	5.79	4.98	7.43	5.46	8.35	6.67	7.79	6.63	6.91	7.31	4.85	4.8	4.15	Tmem168	hypothetical protein LOC101118,hypothetical protein LOC101118,
101142	3.39	6	2.81	5.33	6.86	7.65	6.05	4.02	3.05	3.17	3.44	2.26	3.68	4.2	2.91	3.22	3.47	4.95	5.71	5.08	Itfg2	integrin alpha FG-GAP repeat containing 2
101148	2.58	3.59	3.79	6.07	8.29	6.25	6.44	7.71	8.15	10.04	8.42	10.65	4.84	8.64	5.63	9.36	6.99	3.59	3.37	4.34	B630005N14Rik	hypothetical protein LOC101148
101185	2.35	4.54	2.45	2.27	2	2.86	2.62	2.39	2.62	2.4	2.75	3.03	4.04	1.47	2.4	1.66	3.25	3.67	3.45	3.86	Pot1a	protection of telomeres 1A,protection of telomeres 1A,protection of telomeres 1A,
101187	0.68	2.17	1.28	1.88	1.79	1.73	1.24	1.53	1.51	1.77	0.72	1.53	1.48	1.85	1.33	1.08	2.16	2.45	2.55	1.5	Parp11	poly (ADP-ribose) polymerase family, member 11,poly (ADP-ribose) polymerase family, member 11,poly (ADP-ribose) polymerase family, member 11,
101197	0.45	0.86	0.54	0.66	0.36	0.43	0.39	0.51	0.42	0.71	0.65	0.57	1.43	1.54	0.89	0.65	1.19	0.9	0.83	0.98	AI894139	hypothetical protein LOC101197
101202	0	0.16	0.14	0.05	0	0.08	0.1	0	0	0	0.04	0.25	0	0	0	0	0	0	0	0.08	AI987662	hypothetical protein LOC101202
101206	8.11	8.8	6.55	8.74	9.15	5.6	4.82	20.38	16.21	14.14	12.03	11.8	13.26	10.74	9.06	7.93	9.75	9.89	13.57	16.83	Tada3l	transcriptional adaptor 3-like,transcriptional adaptor 3-like,transcriptional adaptor 3-like,transcriptional adaptor 3-like,
101214	24.53	14.63	16.32	21.09	24.18	10.04	13.75	39.49	36.06	36.29	38.85	41.49	17.29	24.25	15.81	21.79	17.86	22.51	20.72	15.56	Tra2a	transformer-2 alpha,transformer-2 alpha,transformer-2 alpha,
101240	3.43	5.48	3.43	5	4.37	3.59	4.92	13.37	8.66	10.31	11.01	10.51	9.35	10	7.69	9.12	8.87	5.88	6.07	7.5	Wdr91	WD repeat domain 91
101314	56.5	46.67	52.17	59.75	76.67	156	138.91	86.35	46.49	44.6	64.25	42.78	71.65	44.81	52.45	63.78	73.27	49.38	47.06	58.42	6720456B07Rik	hypothetical protein LOC101314
101320	0	0	0	0.04	0	0	0.04	0	0	0	0	0	0.05	0.04	0	0.03	0	0.06	0	0	Dyrk4	dual-specificity tyrosine-(Y)-phosphorylation,dual-specificity tyrosine-(Y)-phosphorylation,
101351	6.08	4.4	4.06	4.41	4.03	2.59	3.39	5.34	7.44	5.3	4.98	5.84	8.57	7.56	7.18	7.82	8.13	5.93	5.55	4.42	A130022J15Rik	RIKEN cDNA A130022J15
101358	3.55	3.79	2.83	5.85	5.58	5.43	5.54	9.15	5.17	5.94	4.12	3.86	6.43	7.2	2	4.11	4.74	6.31	8.81	7.71	Fbxl14	F-box and leucine-rich repeat protein 14
101437	18.14	20.04	14.56	20.75	18.93	11.9	15	19.81	14.13	14.99	13.02	15.98	27.77	27.36	21.59	25.04	24.2	21.57	21.22	23.36	Dhx32	helicase DDX32,helicase DDX32,helicase DDX32,
101471	4.67	6.77	4.85	6.53	7.96	5.71	5.71	12.79	9.29	8.52	8.42	9.2	7.39	8.59	6.06	7.06	6.52	7.95	7.85	8.61	AA673488	hypothetical protein LOC101471,hypothetical protein LOC101471,hypothetical protein LOC101471,hypothetical protein LOC101471,
101476	16.16	18.25	13.46	19.85	18.76	21.25	23.23	17.77	18.3	18.82	12.78	18.05	19.47	23.23	23.33	16.73	18.62	17.26	19.62	18.7	Plekha1	pleckstrin homology domain containing, family A,pleckstrin homology domain containing, family A,
101488	2.64	2.73	3	2.63	3.01	2.27	2.7	4.26	3.19	1.74	2.77	1.96	3.88	2.62	2.6	1.41	2.97	3.77	4.77	4.43	Slco2b1	solute carrier organic anion transporter family,,solute carrier organic anion transporter family,,solute carrier organic anion transporter family,,
101489	6.29	8.29	7.46	7.8	6.36	6.57	5.54	12.8	10.44	9.63	9.92	8.28	15.6	14.21	10.63	11.36	13.94	8.89	12.37	11.15	Ric8	synembryn
101490	2.07	2.44	2.49	2.13	2.36	2.1	2.14	2.41	2.73	2.46	1.85	2.73	5.22	4.87	5.17	5.45	4.44	2.52	2.18	2.05	Inpp5f	inositol polyphosphate-5-phosphatase F,inositol polyphosphate-5-phosphatase F,inositol polyphosphate-5-phosphatase F,inositol polyphosphate-5-phosphatase F,
101497	5.23	5.44	4.87	5.51	5.75	4.55	4.77	11.86	8.1	8.21	7.6	6.12	10.99	12.54	10.99	8.59	9.26	8.34	8.53	9.54	Plekhg2	common-site lymphoma/leukemia guanine nucleotide,common-site lymphoma/leukemia guanine nucleotide,common-site lymphoma/leukemia guanine nucleotide,
101502	6.72	11.21	7.96	9.77	9.02	9.33	7.74	14.94	10.37	10.15	6.3	7.77	15.54	13.39	12.16	12.38	11.77	14.67	13.11	14.81	Hsd3b7	hydroxy-delta-5-steroid dehydrogenase, 3 beta-,hydroxy-delta-5-steroid dehydrogenase, 3 beta-,
101513	27.56	19.23	18.97	22.9	20.19	21.61	21.85	32	18.08	23.52	23.86	20.75	23.07	15.89	21.68	21.13	22.25	23.07	26.69	27.94	2700078K21Rik	ovary-specific MOB-like protein
101533	0.06	0.2	0.05	0.38	0.49	0.48	0.55	0.08	0.08	0.1	0.27	0.29	0.48	0.6	0	0.13	0.16	0.39	0.43	0.31	Klk9	kallikrein 9 homolog
101540	7.14	5.39	5.7	6.33	6.59	4.84	5.83	12.94	9.45	7.04	5.22	6.89	4.75	5.45	2.95	2.63	3.12	9.88	10.38	10.34	Prkd2	protein kinase D2,protein kinase D2,
101543	2.26	1.46	1.31	1.97	1.8	0.57	0.69	4.48	2.32	2.78	2.41	2.28	3.25	4.18	1.45	2.95	2.26	3.36	4.18	5.5	Wtip	WT1-interacting protein
101544	0	0	0.48	0.04	0.16	0	0.04	0.14	0.14	0	0	0	1.44	0.38	0	0.06	1.23	0.29	0.13	0.21	Zfp575	zinc finger protein 575
101565	0.59	0.85	0.81	1.01	0.96	0.83	0.78	1.29	1.68	1.58	1.77	2.28	2.03	1.75	2.03	2.38	2.37	1.1	0.91	0.89	6330503K22Rik	CP110 protein
101568	8.91	11.93	7.22	8.1	8.68	7.82	7.21	10.27	11.13	7.74	8.48	7.41	11.84	8.61	8.58	8.05	9.85	11.18	11.59	11.52	Vrk3	vaccinia related kinase 3
101592	2.45	2.85	2.12	2.61	2.84	2.17	2.32	2.57	2.26	1.68	2.47	2.12	4.29	5.91	3.34	3.1	4.08	3.06	3.17	3.05	Eftud1	elongation factor Tu GTP binding domain,elongation factor Tu GTP binding domain,elongation factor Tu GTP binding domain,
101602	0.94	1	0.19	0.46	0.68	0.73	0.39	0.89	0.51	0.63	0.18	0.42	1.19	1.16	2.25	0.84	0.92	0.41	0.91	0.42	AI467606	hypothetical protein LOC101602
101604	0.52	1.6	0.91	1.7	1.46	1.47	1.4	2.35	0.45	1.26	2.32	1.3	1.91	1.51	1.06	2.06	1.49	1.29	1.66	1.92	E430018J23Rik	hypothetical protein LOC101604,hypothetical protein LOC101604,
101612	5.33	3.93	5.47	6.2	9.04	4.78	4.31	10.4	6.25	6.97	8.21	4.71	7.49	8.17	3.52	8.01	5.4	4.43	6.77	6.53	Grwd1	glutamate-rich WD repeat containing 1
101613	0.03	0	0	0	0	0	0.01	0	0	0.15	0	0.05	0	0.04	0	0.03	0	0	0	0	Nlrp6	NLR family, pyrin domain containing 6,NLR family, pyrin domain containing 6,
101631	1.77	1.94	1.72	0.55	2.88	0.92	3.28	0.98	1.05	0.64	3.02	1.63	1.54	0.55	2.62	0	1.46	0.42	1.39	3	Pwwp2	PWWP domain containing 2 isoform 2
101685	2.27	3.71	3.16	2.96	3.68	2.98	3.01	4.3	3.29	2.67	2.89	3.66	5.08	6.84	5.45	5.62	4.25	3.11	3.19	3.7	Spty2d1	SPT2, Suppressor of Ty, domain containing 1
101700	5.22	5.64	4.59	5.65	7.7	4.35	4.58	5.22	4.65	4.96	3.85	5.85	8.11	8.37	4.52	7.25	7.09	7.67	7.87	6.93	Trim68	tripartite motif containing 68
101706	17.89	22.93	16.94	23.68	20.63	15.72	17.67	29.25	23.78	25.03	21.29	21.85	18.65	18.33	14	11.24	14.83	24.15	27.93	28.76	Numa1	nuclear mitotic apparatus protein 1,nuclear mitotic apparatus protein 1,nuclear mitotic apparatus protein 1,nuclear mitotic apparatus protein 1,
101739	10.63	8.01	8.1	13.13	12.41	11.92	14.68	8.15	9.51	9.53	7.12	13.45	11.68	15.32	12.72	18.54	15.4	7.54	7.26	6.1	Psip1	lens epithelium-derived growth factor,lens epithelium-derived growth factor,lens epithelium-derived growth factor,
101744	0	0	0	0	0	0	0	0	0	0	0	0	0	0	0	0	0	0.04	0	0	C330005M16Rik	hypothetical protein LOC101744
101772	1.62	3.01	2.18	2.57	2.39	2.43	2.19	3.18	2.44	3.67	2.94	2.82	2.35	1.98	1.16	1.77	2.05	3.33	3.86	3.3	Tmem16a	transmembrane protein 16A,transmembrane protein 16A,
101809	0.21	0.22	0.21	0.16	0.44	0.26	0.22	1.05	0.63	0.33	0.66	0.42	0.99	2.7	1.06	0.59	0.8	0.18	0.16	0.17	Spred3	sprouty-related, EVH1 domain containing 3
101831	0.67	1.44	0.41	1.31	1.86	2.16	1.47	1.34	0.18	2.31	1.55	1.87	2.44	1.42	1.46	2.43	1.91	1.72	0.71	0.34	C230052I12Rik	hypothetical protein LOC101831
101835	1.92	0.76	4.43	4.21	1.78	3.69	3.39	0.92	4.03	5.61	3.25	6.45	2.29	2.57	7.97	3.31	5.55	1.71	0.96	0.45	AW146154	hypothetical protein LOC101835
101861	10.84	12.4	12.43	13.27	13.2	14.11	13.88	11.29	12.96	10.79	10.04	12.54	16.01	17.12	14.8	15.77	17.54	19.94	16.46	14.97	Ints4	integrator complex subunit 4,integrator complex subunit 4,
101867	5.03	3.25	3.23	4.38	6.1	3.95	3.14	9.16	5.98	7.22	3.37	5.68	6.47	8.37	4.05	5.31	5.29	4.76	5.9	4.54	1500003O22Rik	hypothetical protein LOC101867
101869	4.72	4.61	4.75	6.63	7.75	3.98	4.22	11.18	8.34	7.26	6.45	6.19	9.75	10.86	7.18	6.34	7.5	7.96	7.36	7.89	Unc45a	smooth muscle cell associated protein-1
101883	3.69	1.49	2.62	2.05	2.92	2.04	1.92	3.59	2.1	2.96	1.94	2.51	2.66	1.66	1.94	0.99	1.41	3.06	3.71	3.36	Tmem149	hypothetical protein LOC101883,hypothetical protein LOC101883,
101943	15.12	17.45	15.08	12.32	12.37	11.75	11.55	19	16.05	14.13	13.59	14.37	14.32	16.67	11.23	14.99	14.24	18	15.8	15.66	Sf3b3	splicing factor 3b, subunit 3,splicing factor 3b, subunit 3,
101966	143.74	81.52	93.46	110.6	114.07	143.38	126.59	158.58	75.01	100.27	112.48	78.17	110.83	80.98	66.02	94.78	82.66	115.75	113.17	114.54	D8Ertd738e	hypothetical protein LOC101966
101985	5.48	6.77	6.03	6.29	6.36	4.21	4.11	12.33	7.18	7.45	12.42	9.92	7	7.03	6.07	4.78	5.96	8.14	7.68	8.94	AA960436	hypothetical protein LOC101985
101994	2.3	2.63	4.16	3.95	4.44	4.78	4.54	7.32	6	7.09	4.53	5.87	3.95	5.26	3.73	3.11	3.3	4.47	4.21	4.34	D8Ertd457e	hypothetical protein LOC101994,hypothetical protein LOC101994,
102022	0.46	0.05	0.05	0	0	0	0	0	0	0.09	0	0.07	0.03	0.04	0.16	0.15	0.03	0	0.03	0.04	Ces6	carboxylesterase 6
102032	28.71	41.73	33.76	41.68	45.38	58.84	56.04	27.25	31.86	28.44	21.01	33.4	21.07	18.66	18.18	44.81	25.39	32.28	25.34	29.64	AI316807	hypothetical protein LOC102032,hypothetical protein LOC102032,
102058	3.54	3.6	3.39	6.4	6.71	3.81	4.76	7.52	5.42	6.34	4.38	4.12	5.66	4.99	3.12	2.52	4.46	6.5	5.89	7.66	Exoc8	exocyst complex component 8
102060	19.17	21.29	12.96	27.99	37.47	10.91	14.75	69.56	30.26	40.17	41.25	27.49	18.1	20.85	9.85	17.31	13.23	24.11	31.57	34.49	Gadd45gip1	growth arrest and DNA-damage-inducible, gamma
102075	0.01	0.02	0.03	0.06	0.02	0.03	0.01	0.08	0.05	0	0	0.02	0.06	0.04	0	0.01	0.05	0.15	0	0.03	Plekhg4	pleckstrin homology domain containing, family G
102093	12.24	12.76	14.39	16.78	14.82	11.37	12.04	9.8	13.49	14	13.12	14.57	7.22	6.62	8.92	8.56	7.9	15.96	14.15	14.11	Phkb	phosphorylase kinase beta
102098	3.14	4	4.74	3.77	3.84	2.57	2.07	4.86	3.3	3.69	3.18	2.64	5.63	5.99	3.51	2.87	4.9	4.68	5.54	5.53	Arhgef18	rho/rac guanine nucleotide exchange factor (GEF)
102103	50.17	69.92	50.83	66.8	52.7	39.12	39.24	53.55	53.91	55.17	50.38	61.45	68.41	66.13	43.22	56.65	68.06	68.81	66.74	72.27	Mtus1	mitochondrial tumor suppressor 1 isoform 1,mitochondrial tumor suppressor 1 isoform 1,
102115	23.4	11.36	19.62	23.41	26.43	17.14	16.84	54.41	35.24	34.53	32.18	23.48	20.36	27.56	11.35	14.74	14.31	28.36	32.07	39.16	Dohh	deoxyhypusine hydroxylase/monooxygenase,deoxyhypusine hydroxylase/monooxygenase,
102122	12.3	16.47	9.3	14.4	18.16	11.43	12.2	19.82	18.12	16.05	13	17.12	17.16	16.32	9.35	21.19	19.91	18.5	17.34	17.76	2310065K24Rik	hypothetical protein LOC102122,hypothetical protein LOC102122,
102124	0.52	1.76	0.82	1.02	0.68	1.29	0.91	2.17	0.83	0.87	1.56	0.79	1.83	2.13	0.7	1.22	1.03	1.09	1.47	1.53	E130303B06Rik	hypothetical protein LOC102124
102141	2.95	5.68	2.72	4.43	4.7	4.18	3.27	3.63	3.69	3.89	2.27	4.04	3.79	3.68	4.18	4.13	4.64	4.64	4.13	4.7	Snx25	sorting nexin 25
102162	6.13	7.97	5.98	6.2	5.07	8.26	6.68	10.19	6.86	6.17	4.47	6.07	7.25	8.46	6.26	6.26	6.17	7.13	7.92	8.53	Taf5l	TAF5-like RNA polymerase II, p300/CBP-associated,TAF5-like RNA polymerase II, p300/CBP-associated,
102182	5.26	6.31	4.65	6.72	4.85	4.88	4.86	5.71	6.59	6.3	4.7	6.64	8.83	9.08	8.45	8.92	9.08	7.06	7.44	5.54	AI931714	hypothetical protein LOC102182
102193	19.04	18.68	14.06	19	23.17	19.81	17.43	17.93	14.68	14.2	12.33	13.6	19.85	17.63	9.87	17.16	15.71	18.93	20.92	19.53	Zdhhc7	zinc finger, DHHC domain containing 7
102209	8.85	6.43	9.19	8.21	6.86	5.51	4.97	23.78	15.07	13.17	19.54	10.93	12.74	10.45	4.66	7.65	9.49	12.55	11.51	13.18	Snapc2	small nuclear RNA activating complex,
102247	20.5	22.1	14.89	20.59	26.39	30.17	23.25	19.51	22.88	17.95	17.13	17.45	22.03	20.61	22.85	25.02	20.6	22.94	24.09	20.02	Agpat6	lysophosphatidic acid acyltransferase zeta,lysophosphatidic acid acyltransferase zeta,
102278	0.19	0.41	0.05	0.63	0.59	0.34	0.34	0.19	0.12	0.7	0.47	0.81	0.63	1.39	0.97	1.85	0.62	0.39	0.07	0.7	Cpne7	copine 7 protein
102294	1.42	1.27	1.89	1.66	2.12	1.55	2.1	0.81	1.31	2.13	0.91	1.61	7.49	4.55	10.53	5.67	8.89	1.64	2.48	1.28	Cyp4v3	family 4 cytochrome P450
102323	18.51	24.73	22.29	22.73	15.91	13.78	13.79	15.66	13.52	16.43	13.18	12.98	6.14	3.62	1.57	3	5.38	26.38	30.33	28.19	Dcun1d2	DCN1, defective in cullin neddylation 1, domain,DCN1, defective in cullin neddylation 1, domain,
102334	18.56	15.76	16.3	18.8	13.11	10.54	11.45	20.99	13.73	14.77	17	14.53	27.76	30.39	19.06	24.71	22.15	17.36	17.62	16.18	Ankrd10	ankyrin repeat domain 10,ankyrin repeat domain 10,ankyrin repeat domain 10,
102339	21.75	25.35	20.37	24.38	24.37	26.35	25.93	32.44	24.54	24.29	23.48	27.16	14.69	10.93	13.32	12.16	13.06	25.43	27.24	27.41	Cog4	component of oligomeric golgi complex 4,component of oligomeric golgi complex 4,
102371	143.96	163	130.13	157.52	120.81	120.22	139.03	103.09	119.56	107.81	77.98	104.95	120.6	144.57	88.9	108.44	108.48	162.64	168.17	193.25	AA407270	hypothetical protein LOC102371
102414	11.02	11.79	8.88	11.7	11.62	9.62	10.88	20.61	13.66	17.05	13.74	15.52	14.26	17.22	12.89	13.1	12.28	12.76	14.08	15.33	Clk3	CDC-like kinase 3,CDC-like kinase 3,
102423	1.76	1.95	1.65	2.41	1.57	1.87	1.78	6.31	4.42	3.77	2.63	4.16	2.26	2.16	2.17	2.39	1.93	2.64	3.24	3.05	Mizf	MBD2-interacting zinc finger,MBD2-interacting zinc finger,
102436	8.8	9.77	8.68	9.63	8.04	10.19	8.63	13.86	12.45	11.52	9.71	10.87	4.31	6.54	5.04	4.41	4.33	12.69	11.92	11.74	Lars2	leucyl-tRNA synthetase, mitochondrial
102448	0	0.12	0.19	0.15	0	0.22	0.18	0.04	0	0.17	0	0.09	0.35	0.4	0	0.39	0.42	0.15	0	0.18	Xylb	xylulokinase homolog (H. influenzae),xylulokinase homolog (H. influenzae),
102462	12.52	9.63	11.95	13.48	10.61	6.28	6.95	21.67	11.8	13.46	17.6	10.23	14.59	13.59	12.31	8.63	14.11	23.36	23.55	28.22	Imp3	IMP3, U3 small nucleolar ribonucleoprotein,
102502	0	0.21	0.07	0.02	0.36	0.02	0.18	1.23	1.45	1.73	1.84	2.33	0.13	0.22	0	0.03	0.06	0.03	0.06	0	AI427122	hypothetical protein LOC102502
102545	5.56	5.16	7.07	6.01	4.89	3.64	3.5	9.22	5.53	3.8	7.2	3.66	17.32	10.38	13.99	12.38	13.31	7.84	11.07	8.62	Cmtm7	CKLF-like MARVEL transmembrane domain containing,CKLF-like MARVEL transmembrane domain containing,
102566	6.63	6.5	7.71	6.86	7.96	4.76	4.08	8.7	6.72	6.6	5.99	6.63	11.9	9.6	6.58	11.01	11.72	10.13	10.65	9.15	Tmem16k	hypothetical protein LOC102566,hypothetical protein LOC102566,hypothetical protein LOC102566,
102570	0.29	0.22	0.1	0.08	0.02	0.04	0.02	0.07	0.04	0.44	0.12	0.26	0.08	0.08	0.04	0.03	0.06	0.09	0.32	0.21	Slc22a13	solute carrier family 22 (organic cation
102580	2.36	2.84	3.11	1.91	2.39	1.33	1.85	3.5	2.63	1.63	2.04	2.79	5.18	4.74	4.36	2.89	5.51	2.93	3.97	3.98	Alg9	disrupted in bipolar disorder 1 homolog
102595	5.27	9.22	5.56	4.8	5.48	2.98	3.63	12.94	7.4	7.69	7.78	7.22	19.25	24.09	15.82	18.79	16.8	6.74	6.37	7.27	Plekhq1	PH domain-containing protein homolog,PH domain-containing protein homolog,PH domain-containing protein homolog,
102607	8.16	10.89	8.5	10.61	10.97	10.61	11.75	11.79	11.36	9.31	8.01	10.16	7.94	7.99	7.62	7.74	7.63	11.53	14.63	13.15	Snx19	sorting nexin 19
102614	0.9	0.31	0.98	0.48	1.5	0.34	0.76	1.72	0.75	0.92	0.69	0.44	3.49	5.02	3.76	1.99	3.9	1.06	1.4	1.2	Rpp25	ribonuclease P 25kDa subunit
102626	8.96	7.09	7.45	8.77	9.35	6.29	7.08	12.63	10.38	9.13	8.96	9.05	6.33	5.25	4.43	4.42	5.35	12.61	13.82	11.91	Mapkapk3	mitogen-activated protein kinase-activated,mitogen-activated protein kinase-activated,mitogen-activated protein kinase-activated,mitogen-activated protein kinase-activated,
102632	57.83	74.03	62.47	61.1	47.88	44.15	45.37	49.6	47.75	52.52	48.6	49.95	9.4	7.07	7.8	6.13	9.64	71.5	68.89	74.61	Acad11	acyl-Coenzyme A dehydrogenase family, member 11
102644	5	7.8	5.19	6.66	5.96	7.81	5.74	9.1	5.73	7.18	4.81	4.88	14.65	14.6	7.65	11.62	10.36	8.7	9.7	9.21	Oaf	out at first
102657	1.33	2.27	1.81	2.41	2.41	1.85	1.93	3.14	1.45	1.53	0.92	1.46	5.31	3.6	1.93	3.77	3.82	2.88	2.96	3.26	Cd276	CD276 antigen,CD276 antigen,
102680	0	0	0	0.02	0.02	0	0.02	0.03	0.17	0.08	0.14	0.01	0.17	0.39	0	0.53	0.13	0	0	0	Xtrp3s1	X transporter protein 3 similar 1
102693	20.89	19.86	20.62	28.82	36.79	17.49	19.74	30.59	23.6	24.26	20.05	18.78	21.58	26	18.63	13.94	17.58	34.06	39.51	40.41	Phldb1	pleckstrin homology-like domain, family B,,pleckstrin homology-like domain, family B,,pleckstrin homology-like domain, family B,,pleckstrin homology-like domain, family B,,
102747	2.14	2.19	2.24	1.94	1.9	1.45	2.03	2.73	1.3	3.73	2.61	3.25	2.51	4.21	2.91	5.8	3.03	2.07	2.16	1.97	Lrrc49	leucine rich repeat containing 49,leucine rich repeat containing 49,leucine rich repeat containing 49,
102774	1.16	1.32	0.98	2.52	1.31	1.36	1.55	3.62	3.44	3.31	2.33	3.07	1.5	3.34	2.44	2.71	2.17	2.04	1.64	1.69	Bbs4	Bardet-Biedl syndrome 4 homolog
102791	16.31	21.84	20.5	22.88	23.66	29.27	39.24	30.29	17.88	20.38	14.99	17.33	9.84	6.97	6.59	6.74	8.15	21.65	21.62	27.79	Tcta	T-cell leukemia translocation altered
102857	43.34	42.53	34.63	46.63	64.36	59.26	50.52	50.8	45.91	37.24	38.53	33.55	66.37	67.7	51.84	56.39	57.2	78.7	65.76	66.62	Slc6a8	solute carrier family 6 (neurotransmitter,solute carrier family 6 (neurotransmitter,solute carrier family 6 (neurotransmitter,
102866	20.22	20.52	22.94	34.62	35.07	37.45	37	21.93	22.46	24.65	27.42	30.1	31.39	32.62	42.83	34.22	34.76	19.82	16.57	13.2	Pls3	plastin 3 precursor,plastin 3 precursor,plastin 3 precursor,
102871	0.01	0.03	0.09	0	0	0.05	0.02	0.02	0	0	0	0	0.03	0.1	0	0.32	0.16	0.04	0	0	D330045A20Rik	hypothetical protein LOC102871,hypothetical protein LOC102871,
102920	0	0	0.04	0.1	0.03	0.09	0.1	0.09	0	0.26	0	0.03	0.52	0.65	0.9	0.73	0.77	0.02	0.08	0.03	Cenpi	centromere protein I,centromere protein I,centromere protein I,centromere protein I,
102941	0.17	0	0.22	0.03	0.21	0	0.12	0.55	0.05	0	0.4	0.02	0.36	0.62	0.09	0.2	0.15	0.23	0.47	0.28	B630019K06Rik	hypothetical protein LOC102941
102954	0.56	0.63	0.54	1.44	1.57	0.18	0.69	1.54	0	0.5	1.01	0.5	0.3	0.98	0	1.18	1.05	1.64	1.36	1.18	Nudt10	nudix-type motif 10
102991	0	0	0	0	0	0	0	0	0	0	0	0	0	0	0	0	0.03	0	0	0	AU022751	hypothetical protein LOC102991
103080	6.08	6.42	7.33	9.26	9.86	16.19	12.98	4.19	5.4	8.95	4.6	10.27	10.25	14.82	11.46	11.05	11.32	6.63	5.07	5.43	2014-09-10	septin 10 isoform 2
103098	0	0	0	0.03	0	0.06	0.05	0	0	0	0	0.01	0.02	0	0	0	0	0	0	0	Slc6a15	solute carrier family 6, member 15,solute carrier family 6, member 15,
103135	4.44	4.92	3.99	4.4	5.12	3.66	3.31	6.29	3.8	4.28	3.04	4.31	5.91	9.38	4.42	7.2	4.72	6.11	6.3	6.25	Usp52	ubiquitin specific peptidase 52,ubiquitin specific peptidase 52,ubiquitin specific peptidase 52,
103136	6.47	6	6.93	8.38	6.68	5.82	4.93	8.02	8.76	4.89	8.11	6.89	8.33	12.73	6.55	11.36	8.2	6.94	6.96	6.1	Pwp1	periodic tryptophan protein 1 homolog,periodic tryptophan protein 1 homolog,
103140	3.01	2.96	2.19	2.69	1.69	1	1.44	2.97	4.71	2.52	2.25	1.44	2.14	2.62	2.25	1.61	3.56	3.62	2.72	2.94	Gstt3	glutathione S-transferase, theta 3
103142	0.08	0.07	0.15	0.42	1.14	0.68	1.06	0.71	0.35	0.5	0.91	0.77	0.13	0.73	0	0.33	0.48	0	0.15	0.33	Rdh9	retinol dehydrogenase 9,retinol dehydrogenase 9,
103149	0.61	0.07	0.52	0.48	0.59	0.8	0.19	0.32	0.45	0.28	0.75	0.23	0.08	0	0.25	0.05	0.02	0.86	0.6	0.81	Upb1	ureidopropionase, beta
103161	0	0	0	0	0	0	0	0	0	0	0	0	0.15	0	0	0	0.04	0	0	0	Apof	apolipoprotein F
103172	474.38	240.1	451.56	338.68	343.02	109.63	163.54	973.61	587.98	499.24	422.67	380.94	201.88	256.25	109.07	116.71	153.41	769.04	926.88	1121.4	Ndg2	Nur77 downstream gene 2,Nur77 downstream gene 2,
103199	15.93	19.57	14.63	18.08	17.42	14.79	15.19	19.2	20.93	17.66	14.69	18.86	13.43	16.23	12.52	14.62	14.34	21.38	27	22.71	Fig4	Sac domain-containing inositol phosphatase 3
103213	2.09	1.72	1.89	2.27	2.19	1.32	1.29	2.17	1.77	1.67	2.54	1.74	3.94	4.55	3.1	3.57	3.65	2.41	2.25	2.82	Traf3ip2	Traf3 interacting protein 2
103220	0.77	1.85	0.47	0.83	0.53	0.64	0.62	0.63	0.15	0.89	0.42	0.66	0.46	0.11	0.1	0.25	0.34	0.66	0.59	0.94	BC030307	Grp94 neighboring nucleotidase isoform 2
103236	43.88	41.67	35.6	56.44	56.19	32.62	34.59	81.81	41.45	51.93	45.36	40.34	43.95	47.73	25.77	32.02	31.54	58.89	66.63	74.08	Csnk1g2	casein kinase 1, gamma 2,casein kinase 1, gamma 2,
103266	7.92	13.41	5.78	8.24	5.85	5.48	5.64	7.95	5.43	7.7	8.51	6.39	11.84	13.06	8.59	10.02	13.87	6.76	11.09	7.45	AI597468	hypothetical protein LOC103266
103268	1.98	1.11	1.22	1.53	1.25	1.22	1.41	1.04	0.64	1.37	0.44	1.3	1.25	0.95	0.6	1.31	1.39	1.74	1.59	1.06	2410017P07Rik	hypothetical protein LOC103268,hypothetical protein LOC103268,hypothetical protein LOC103268,
103284	3.16	3.84	3.21	3.67	5.9	2.89	3.21	5.34	3.26	3.36	5.39	2.15	4.52	3.09	2.48	3.25	3.07	3.54	4.38	5.41	Zc3h10	zinc finger CCCH type containing 10
103406	1.42	0.96	1.49	2.27	1.5	0.63	0.9	2.3	1.37	1.42	1.5	1.18	1.39	0.85	0.5	0.21	1.03	1.85	2.48	2.32	9130206N08Rik	hypothetical protein LOC103406
103425	11.86	13.81	12.14	15.06	17.38	7.28	8.54	35.44	20.82	18.96	14.07	15.98	17.46	19.37	10.45	12.16	13.48	18.62	22.21	21.09	Ncln	nicalin homolog
103466	8.23	15.84	11.02	18.04	18.7	17.66	19.05	15.89	12.43	14.12	14.02	13.43	6.74	7.43	4.2	4.94	6.59	16.8	17.19	17.13	Nt5dc3	5'-nucleotidase domain containing 3,5'-nucleotidase domain containing 3,
103468	2.5	3.73	3.2	3.68	4	2.54	3	2.8	2.69	3.17	2.12	2.82	6.21	7.65	3.87	6.18	6.64	3.27	3.74	3.2	Nup107	nucleoporin 107
103511	2.15	2.17	1.55	1.8	2.27	2.93	2.35	3.08	1.54	3.03	2.03	3.19	2.66	1.68	3.05	1.53	3.23	1.57	1.41	1.41	BB146404	hypothetical protein LOC103511
103534	31.42	25.59	24.81	24.47	21.98	14.86	15.92	34.51	21.5	18.02	18.52	15.76	32.59	26.52	20.74	25.74	27.9	36.21	39.16	41.88	Mgat4b	mannoside acetylglucosaminyltransferase 4,
103537	2.65	1.95	2.35	2.45	2.78	2.08	2.82	2.77	4.68	6.16	4.92	5.92	3.26	3.7	4.9	4.74	4.17	2.58	1.49	1.48	Mbtd1	mbt domain containing 1
103551	0.12	0.05	0.23	0.66	0.43	0.05	0.25	0.94	1.01	0.7	0.43	0.37	0.52	0.46	0.14	0.47	0.19	1.57	1.28	1.47	E130012A19Rik	hypothetical protein LOC103551
103554	29.92	30.33	37.63	36.72	23.88	37.33	37.72	18.83	34.93	32.46	28.79	39.24	25.4	28.97	35.99	33.73	31.65	32.02	29.96	30.42	Psme4	proteasome (prosome, macropain) activator
103573	7.48	6.67	14.24	14.38	10.84	12.95	11.48	4.61	11.46	10.98	10.37	14.72	12.35	20.21	22.38	20.97	22.08	6.06	4.42	3.39	Xpo1	exportin 1, CRM1 homolog
103583	10.65	15.39	13.07	14.83	15.55	11.1	9.84	14.5	15.19	13.61	11.45	15.03	16.38	17.94	21.79	18.7	14.97	14.23	14.14	12.88	Fbxw11	F-box and WD-40 domain protein 11,F-box and WD-40 domain protein 11,F-box and WD-40 domain protein 11,F-box and WD-40 domain protein 11,
103655	0	0	0	0.03	0.07	0	0.09	0	0	0	0.1	0	0	0	0	0	0	0	0	0	Sec14l4	SEC14 (S. cerevisiae)-like 2
103677	5.03	5.48	5.11	7.88	6.76	7.99	8.88	6.38	6.74	7.57	6.05	8.55	5.8	7.17	5.61	5.93	5.5	6.46	6.75	5.96	Smg6	telomerase subunit EST1A
103694	33.84	37.07	31.59	36.66	45.09	30.96	37.8	68.49	44.89	46.03	51.74	37.66	28.17	21.5	22.25	17.25	26.64	49.65	43.78	48.02	Tmed4	transmembrane emp24 protein transport domain
103710	1.2	1.48	1.98	1.67	1.49	0.79	0.9	6.25	3.27	3.65	2.37	2.96	10.68	8.91	3.81	6.73	5.77	2.64	3.86	3.34	Slc35e4	solute carrier family 35, member E4
103711	6.43	7.86	4	7.74	8.21	4.76	5.92	11.27	5.24	4.49	9.39	4.93	7.04	7.17	3.54	5.79	8.49	10.85	13.17	13.31	Pnpo	pyridoxine 5'-phosphate oxidase
103712	0	0.18	0	0	0	0	0	0	0	0	0	0	0	0	0	0.12	0	0	0	0	6330403K07Rik	hypothetical protein LOC103712
103724	4.57	3.68	4.63	4.03	4.61	2.21	2.7	8.37	5.01	4.29	5.49	3.66	7.67	6.2	4.96	4.82	5.05	6.05	10.52	6.93	Tbc1d10a	TBC1 domain family, member 10a
103733	13.83	15.29	14.52	13.74	21.22	15.17	17.41	23.71	12.98	16.32	16.66	13.31	19.19	19.16	15	15.54	16.32	17.43	22.61	19.7	Tubg1	tubulin, gamma 1
103737	4.97	4.24	3.81	4.33	4.32	4.69	4.47	5.03	3.97	5.28	6.37	6.06	4.23	3.27	2.33	4.72	4.34	3.24	4.49	3.92	Pex12	peroxisomal biogenesis factor 12,peroxisomal biogenesis factor 12,peroxisomal biogenesis factor 12,peroxisomal biogenesis factor 12,
103742	34.2	34.16	26.61	47.38	73.22	25.83	87.93	72.44	44.48	42.83	31.33	35.9	23.98	24.4	8.51	13.39	19.04	45.93	41.06	53.67	1810046J19Rik	hypothetical protein LOC103742
103743	6.62	7.53	5.11	6.86	5.49	4.93	5.34	10.2	6.3	6.25	6.9	4.31	11.23	9.91	7	9.1	8.52	10.44	8.91	11.25	Tmem98	hypothetical protein LOC103743
103765	0.42	0.38	0.34	0.76	0.91	1.27	0.55	0.87	1.34	0.89	1.61	0.73	1.36	1.09	2.52	0.93	1.51	0.49	0.73	0.49	Tmem17	transmembrane protein 17
103768	4.04	4.98	6.72	3.37	6.25	4.53	4.82	5.6	4.33	5.3	7.27	3.87	8.56	5.84	6.83	6.57	6.47	5.11	7.21	5.19	Tubg2	tubulin, gamma 2,tubulin, gamma 2,
103775	0.22	0	0.04	0.1	0.14	0	0.16	0	0	0	0	0.21	0	0.14	0	0	0.05	0	0.12	0	Slc25a41	solute carrier family 25, member 41,solute carrier family 25, member 41,
103784	4.9	6.01	4.79	5.98	5.67	5.82	6.09	4.34	4.58	6.63	3.71	5.59	3.05	3.45	2.01	2.39	4.05	4.88	4.67	5.73	Wdr92	WD repeat domain 92
103806	1.35	2.44	3.2	2.46	2.18	0.9	1.15	6.87	4.51	4.65	5.12	3.8	4.56	4.63	3.74	2.44	3.23	3.69	4.2	3.93	Maml1	mastermind like 1
103836	5.89	6.43	3.74	3.25	4.43	3.33	3.59	12.27	5.91	7.2	7.38	7.27	4.14	3.61	2.14	4.4	2.9	5.45	5.39	4.86	Zfp692	zinc finger protein 692,zinc finger protein 692,
103841	31.94	25.84	24.61	25.51	26.44	32.4	31.46	35.73	19.28	20.78	19.26	14.67	27.4	26.98	13.91	19.8	22.58	39.02	38.14	41.42	Cuedc1	CUE domain containing 1,CUE domain containing 1,
103844	3.41	6.47	2.42	3.11	2.72	2.91	2.34	5.64	3.59	3.33	3.59	3.67	2.49	3.79	1.82	1.67	2.47	4.18	3.77	5.56	AI842396	inhibitor of CDK interacting with cyclin A1,inhibitor of CDK interacting with cyclin A1,inhibitor of CDK interacting with cyclin A1,
103850	9.74	9.19	6.78	10.64	10.08	4.65	5.12	10.68	9.09	7.23	5.17	7.26	9.16	8.46	5.26	4.99	7.2	11.1	11.7	13.84	Nt5m	5',3'-nucleotidase, mitochondrial,5',3'-nucleotidase, mitochondrial,
103889	0.83	0.58	0.43	0.47	0.62	0.17	0.5	1.42	1.04	0.99	0.94	0.33	0.91	0.8	0.12	0.27	0.54	1.13	1.13	0.59	Hoxb2	homeo box B2
103963	23.39	27.68	21.04	25.2	25.22	19.2	21.72	35.84	30.68	31.41	23.84	28.72	41.39	50.16	32.28	41.91	43.11	27.8	33.2	28.92	Rpn1	ribophorin I
103967	0.88	0.96	0.95	1.45	0.77	1.18	1.28	1.22	0.83	1.42	1.16	1.48	1.34	0.95	2.07	0.95	1.03	1.18	1.31	1.29	Dnm3	dynamin 3,dynamin 3,
103968	0.35	0.41	0.48	0.12	0.41	0.33	0.59	1.25	0.3	0.5	0.34	0.18	0.79	0.31	0.07	0	0.48	0.8	0.65	0.64	Plin	perilipin,perilipin,perilipin,
103988	10.23	9.78	7.82	31.59	28.73	23.65	27.36	14.46	18.65	17.11	14.95	13.37	4.86	5.55	3.71	3.47	5.17	20.53	19.44	21.65	Gck	glucokinase,glucokinase,glucokinase,
104001	3.5	2.78	2.26	3.01	2.27	2.65	2.49	2.98	0.8	2.27	1.74	1.84	2.82	0.84	1.16	0.87	3.38	3.06	3.86	3.92	Rtn1	reticulon 1 isoform RTN1-A
104009	13.29	12.9	10.79	15.87	16.33	7.94	7.99	24.68	21.53	18.75	20.1	16.22	80.18	71.8	56.33	56.18	65.84	22.08	23.42	21.93	Qsox1	quiescin Q6 sulfhydryl oxidase 1 isoform b
104010	0.56	0.17	0.45	1.2	0.93	1.25	1.08	0.86	0.12	0.84	0.15	0.22	5.69	6.22	3.28	3.87	4.38	0.79	1.01	0.98	Cdh22	cadherin 22
104079	0	0	0.04	0.14	0.04	0	0	0	0.14	0.17	0	0.09	0.45	0.65	0	0.67	0.21	0.06	0.54	0.26	Nxph3	neurexophilin 3
104080	0	0.07	0.07	0.06	0	0.16	0.05	0.1	0	0	0	0.12	0.29	0.29	0.04	0	0.13	0.09	0.15	0.11	Nxph4	neurexophilin 4
104086	8.28	10.27	6.15	12.41	7.96	7.34	7.38	12.94	8.99	15.82	12.54	12.82	8.23	6.22	5.98	6.43	7.95	12.24	12.59	17.31	Cyp27a1	cytochrome P450, family 27, subfamily a,
104099	9.81	14.06	8.3	11.2	9.92	8.51	9.39	11.09	7.9	8.72	7.58	8.43	12.56	15.41	10.21	12.67	11.34	12.8	13.59	12.35	Itga9	integrin alpha 9,integrin alpha 9,
104110	6.48	8	4.88	7.08	9.51	7.51	7.03	9.55	6.68	9.37	6.28	6.27	4.84	5.82	3.48	4.53	4.6	8.48	8.3	9.26	Adcy4	adenylate cyclase 4,adenylate cyclase 4,
104111	1.29	1.95	1.32	0.98	0.88	0.74	0.67	1.72	0.94	0.98	0.57	1.02	3.15	2.77	2.91	2.32	2.44	1.67	1.62	1.49	Adcy3	adenylate cyclase 3,adenylate cyclase 3,adenylate cyclase 3,
104112	8.34	12.59	8.49	12.2	11.61	11.38	10.83	17.59	11.56	11.07	9.62	10.44	21.01	17.69	13.45	14.45	17.16	12.31	14.15	12.77	Acly	ATP citrate lyase,ATP citrate lyase,
104130	376.82	277.71	314.25	424.49	564.06	176.01	498.39	654.11	267.23	273.58	284.77	258.53	147.92	125.87	81.07	126.41	118.95	519.45	508.79	589.7	Ndufb11	neuronal protein 15.6
104156	2.81	2.72	2.61	2.69	7.42	4.85	4.98	5.6	4.28	2.86	2.65	2.6	9.12	10.46	7.76	8.2	8.05	3.99	3.93	3.48	Etv5	ets variant gene 5,ets variant gene 5,
104158	35.92	27.43	28.31	42.16	26.76	23.5	22.53	19.75	19.73	15.13	18.21	19.48	2.04	1.07	1.42	3.3	2.18	26.93	36.55	29.07	Ces3	carboxylesterase 3
104174	0.07	0.03	0.14	0.1	0.06	0.1	0.06	0.12	0.21	0.08	0.07	0.12	0.63	0.99	0.27	0.69	0.68	0.03	0.1	0.08	Gldc	glycine decarboxylase,glycine decarboxylase,
104175	14.16	8.87	14.26	30.41	22.74	7.45	11.19	35.15	28.64	25.27	23.33	17.76	8.5	10.39	5.03	5.96	5.28	39.74	39.74	47.01	Sbk1	SH3-binding kinase 1
104183	0	0	0	0	0	0	0	0	0.06	0	0	0	12.96	13.95	12.22	22.79	16.88	0	0	0	Chi3l4	chitinase 3-like 4
104184	11.87	11.41	10.78	16.84	12.37	15.02	12.84	11.84	12.9	11.45	9.92	13.15	13.78	11.28	9.58	8.73	14.46	16.28	15.89	13.92	Blmh	bleomycin hydrolase
104215	25.2	23.53	32.39	38.16	31.36	29.94	31.85	29.52	28.34	34.47	29.24	31.88	28.07	19.77	40.27	28.73	34.46	37.1	30.66	28.35	Rhoq	ras homolog gene family, member Q
104248	3.29	6.19	4.27	4.5	4.89	3.45	3.34	6.94	5.57	4.38	4.3	4.25	6.8	6.56	5.2	5.09	5.35	6.92	5.95	6.88	Cabin1	calcineurin binding protein 1,calcineurin binding protein 1,
104252	11.3	12.12	7.91	9.08	8.04	6.58	7	15.28	10.83	13.28	9.28	7.7	8.86	5.46	5.46	7.99	9.63	9.8	13.38	14.17	Cdc42ep2	CDC42 effector protein (Rho GTPase binding) 2,CDC42 effector protein (Rho GTPase binding) 2,
104263	4.14	4.83	4.69	6.93	5.27	6.68	6.51	6.96	7.97	7.23	7.67	8.02	9.63	12.8	14.03	11.74	10.43	6.53	6.51	5.97	Jmjd1a	jumonji domain containing 1A isoform 1,jumonji domain containing 1A isoform 1,jumonji domain containing 1A isoform 1,
104271	0.02	0.01	0	0.01	0	0.03	0.03	0	0	0.04	0.03	0.06	0.04	0.01	0.04	0.03	0.04	0.02	0	0	Tex15	testis expressed gene 15
104303	43.6	43.16	39.92	59.87	52.08	104.27	84.63	47.4	39.45	39.14	30.21	50.53	58.44	72.68	62.32	90.5	63.95	50.48	54.8	55.57	Arl1	ADP-ribosylation factor-like 1
104318	17.19	20.13	21.89	30.12	34.39	41.67	40.78	31.46	22.8	25.74	26.1	23.55	35.05	38.2	32.09	37.67	33.47	23.99	29.35	26.36	Csnk1d	casein kinase 1, delta isoform 1,casein kinase 1, delta isoform 1,
104346	2.65	3.01	1.63	3.6	4.89	3.4	3.46	4.97	2.57	3.04	3.86	2.86	5.11	6.29	3.35	5.03	4.82	4.03	2.96	3.86	Gas8	growth arrest specific 8,growth arrest specific 8,
104348	2.17	4.41	3.98	5.08	4.14	4.2	5.68	7.36	0.71	1.31	4.41	4.63	5.25	3.77	2.46	4.1	2.56	3.42	6.31	3.75	Zfp120	zinc finger protein 120 isoform 2
104349	0.81	0.72	2.37	3.62	1.14	2.66	2.52	0.52	1.33	2.72	0.89	3.44	1.43	1.98	2	2.73	2.57	1.33	0.6	0.56	Zfp119	zinc finger protein 119
104360	0.4	0.07	0.21	0.2	0.12	0.03	0	0.05	0	0	0	0.05	0	0	0.07	0	0	0.09	0.14	0.1	Isl2	insulin related protein 2 (islet 2)
104362	3.24	1.18	0.94	2.01	2.37	2.67	2.08	0.45	2.4	2.06	1.38	1.7	0.35	0	0	0	0.28	3.63	2.33	1.6	Meig1	meiosis expressed gene 1,meiosis expressed gene 1,
104383	6.83	6.18	6.59	5.86	5.6	3.57	3.88	6.7	3.54	3.56	3.05	3.34	3.77	4.01	1.12	1.91	2.85	5.99	7.62	8.92	Rcor2	REST corepressor 2,REST corepressor 2,REST corepressor 2,
104394	15.5	17.61	12.43	13.34	15.76	11.35	10.91	25.37	16.2	16.57	16.43	13.38	16.59	19.27	14.03	14.59	14.28	15.5	15.66	18.25	E2f4	E2F transcription factor 4
104401	4.03	4.41	4.3	4.46	5.06	2.98	4.06	8.48	5.94	5.48	4.92	4.5	7.38	9.09	5.78	5.42	5.81	5.87	7.37	7.44	Pcnxl3	pecanex-like 3,pecanex-like 3,pecanex-like 3,pecanex-like 3,pecanex-like 3,
104416	13.06	16.34	12.26	13.65	13.63	15.33	13.86	22.66	19.6	16.88	15.42	15.26	12.43	15.51	9.29	11.63	10.66	18.58	20.42	18.1	Bap1	Brca1 associated protein 1
104418	19.73	21.67	18.24	18.28	16.24	9.74	10.02	27.61	19.03	22.44	20.31	16.46	23.37	22.18	18.39	16.46	17.97	24.89	28.79	29.69	Dgkz	diacylglycerol kinase zeta,diacylglycerol kinase zeta,diacylglycerol kinase zeta,
104444	40.95	32.03	24.4	40.3	62.23	55.27	56.24	39.38	25.57	39.47	28.78	38.53	55.76	45.61	46.91	47.92	54.93	35.68	32.51	32.83	Rexo2	small fragment nuclease
104445	10.18	13.4	10.61	10.8	9.63	6.8	7.52	26.09	17.01	14.61	11.97	11.3	14	13.68	9.18	9.04	11.45	18.84	20.9	22.82	Cdc42ep1	CDC42 effector protein (Rho GTPase binding) 1
104457	16.8	13.58	9.62	13.98	12.35	10.27	14.37	16.24	11.84	11.65	9.05	10.37	14.56	18.28	4.69	15.72	18.56	15.15	19.28	14.95	0610010K14Rik	hypothetical protein LOC104457,hypothetical protein LOC104457,
104458	15.14	15.34	16.93	17.6	21.25	15.95	16.78	13.61	14.47	13.73	11.95	13.92	24.23	27.84	21.09	28.55	25.73	16.35	14.51	11.92	Rars	arginyl-tRNA synthetase
104479	6.63	12.02	6.57	11.71	10.85	8.36	9.79	31.78	28.3	29.32	22.25	31.66	6.41	11.4	5.55	9.98	5.51	12.84	17.13	13.46	Ccdc117	coiled-coil domain containing 117
104570	3.49	4.71	5.13	7.77	6.8	9.05	9.55	5.22	7.71	11.28	10.74	14.26	6.57	12.99	11.59	11.77	10.67	4.15	2.93	2.89	Smek2	SMEK homolog 2, suppressor of mek1,SMEK homolog 2, suppressor of mek1,SMEK homolog 2, suppressor of mek1,SMEK homolog 2, suppressor of mek1,
104582	0	0.18	0	0.15	0	0	0	0.14	0	0.36	0.49	0.26	1.63	0.94	0.09	0.61	0.87	0.24	0.26	0.71	Rprml	reprimo-like
104601	0.12	1.01	0.56	0.37	0.68	0.95	0.72	0.48	0.38	0.46	0.56	0.28	0.33	0.3	0.3	0.24	0.2	1.09	0.64	0.8	Mycbpap	Myc-binding protein-associated protein,Myc-binding protein-associated protein,Myc-binding protein-associated protein,Myc-binding protein-associated protein,
104625	4.98	5.71	6	6.47	6.7	6.37	5.62	3.47	4.82	7.72	4.57	8.82	10.01	15.23	17.87	13.94	15.83	4.99	3.2	2.86	Cnot6	CCR4-NOT transcription complex, subunit 6,CCR4-NOT transcription complex, subunit 6,CCR4-NOT transcription complex, subunit 6,
104662	8.64	10.71	9.39	13.32	12.73	13.31	12.33	22.41	21.39	29.46	25.49	29.75	13.31	22.12	13.44	20.62	15.27	8.45	8.5	7.63	Tsr1	TSR1, 20S rRNA accumulation,TSR1, 20S rRNA accumulation,
104681	3.83	5.43	3.89	3.38	4.46	1.89	2.35	4.34	3.3	3.23	3.01	2.67	8.52	8	4.77	8.74	6.77	6.33	9.03	5.44	Slc16a6	solute carrier family 16, member 6 isoform b
104709	1.91	3.37	2.85	2.69	2.19	1.34	1.86	4.78	2.01	2.32	2.34	2.54	2.51	3.32	2.35	2.63	2.53	2.9	2.99	4.44	BB220380	p87 phosphoinositide 3-kinase gamma adapter,p87 phosphoinositide 3-kinase gamma adapter,
104721	34.07	26.92	32.59	40.7	37.17	43.43	41.24	21.52	28.32	30.81	21.73	33.92	31.71	34.98	39.28	43.26	36.2	31.9	30.97	23.5	Ddx1	DEAD (Asp-Glu-Ala-Asp) box polypeptide 1
104725	20.76	16.75	14.83	22.6	28.29	61.83	53.69	26.93	14.55	7.92	13.81	11.09	21.35	12.27	29.09	13.78	23.63	26.79	29.1	30.52	1110002B05Rik	hypothetical protein LOC104725
104732	0.13	0.53	0.09	0.07	0.13	0.17	0.23	0.54	0.1	0.06	0	0.06	0.95	0.91	0.6	0.59	0.4	0.04	0.04	0.18	4930427A07Rik	hypothetical protein LOC104732
104759	2.53	4.05	2.97	2.67	4.37	2.46	2.62	4.21	3.54	2.55	2.08	3.12	28.35	18.15	25.36	17.28	24.2	2.29	2.5	3.97	Pld4	phospholipase D family, member 4,phospholipase D family, member 4,
104771	12.2	13.63	10.45	8.41	7.19	3.99	5.57	15.61	9.68	6.41	8.92	7.45	10.84	6.34	7.72	4.77	8.94	13.28	15.12	13.16	1200003C05Rik	JNK1-associated membrane protein,JNK1-associated membrane protein,
104776	71.38	83.57	75.75	86.31	54.88	65.2	74.43	67.84	73.91	72.99	76.53	74.69	19.65	23.24	19.88	21.75	20.18	96.17	84.02	80.6	Aldh6a1	aldehyde dehydrogenase family 6, subfamily A1
104799	10.19	10.84	7.32	10.85	12.2	12.63	12.77	17.49	14.09	15.69	14.3	14.88	13.24	9.63	11.71	8.68	12.9	11.31	11.71	8.33	AI413782	hypothetical protein LOC104799,hypothetical protein LOC104799,hypothetical protein LOC104799,hypothetical protein LOC104799,
104806	0.38	0.58	0.66	0.98	0.95	0.94	0.93	0.68	0.58	0.91	0.98	0.95	1.05	1.57	1.75	0.98	1.65	0.39	0.53	0.54	Fancm	Fanconi anemia, complementation group M,Fanconi anemia, complementation group M,
104816	0.06	0.05	0.13	0.13	0.02	0.02	0.02	0.08	0.04	0	0.13	0.07	1.24	0.51	0.78	0.53	1.01	0	0.18	0.19	A530050D06Rik	hypothetical protein LOC104816
104831	4.89	4.89	5.33	5.51	6.92	5.21	4.25	20.76	12.73	14.28	16.88	12.73	14.66	17.18	10.48	11.89	11.64	7.06	8.48	8.3	Ptpn23	protein tyrosine phosphatase, non-receptor type
104836	3.33	3.26	3.59	3.67	4.46	4.55	5.36	6.88	4.67	7.25	5.64	6.56	5.71	5.19	4.68	5.48	5.19	4.62	4.18	4.34	Cbll1	Casitas B-lineage lymphoma-like 1,Casitas B-lineage lymphoma-like 1,Casitas B-lineage lymphoma-like 1,
104859	0.87	1.89	2.13	1.96	1.99	1.67	1.42	1.74	1.61	1.62	0.98	1.53	1.84	1.06	1.57	1.07	1.29	1.78	2.1	1.98	4930573I19Rik	hypothetical protein LOC104859,hypothetical protein LOC104859,
104871	1.56	1.99	1.63	1.74	2.15	1.83	1.52	1.71	1.12	1.33	0.75	1.55	2.4	3.03	5	1.75	2.63	1.62	1.08	1.37	Spata7	spermatogenesis associated 7,spermatogenesis associated 7,
104884	2.03	1.87	1.3	1.8	2.1	1.15	1.69	2.84	1.81	2.53	2.26	1.99	3.13	2.63	1.63	2.28	3.15	2.68	2.81	3	Tdp1	tyrosyl-DNA phodphodiesterase 1,tyrosyl-DNA phodphodiesterase 1,tyrosyl-DNA phodphodiesterase 1,
104885	0.68	0.21	0.6	0.44	0.73	0.15	0.2	0.08	0.17	0.1	0.48	0.41	0.12	0.53	0	0.48	0.5	0.34	0.52	0.88	Tmem179	hypothetical protein LOC104885
104886	0.49	0.44	0.79	0.38	0.6	0.49	0.63	0.9	0.36	0	0	0	2.2	3.91	2.4	4.52	2.96	1.05	0.53	0.46	Rab15	RAB15, member RAS oncogene family
104910	0.48	0.16	0.89	0.94	1.13	0.72	0.69	0.79	1.94	0.79	0.32	0.89	0.9	1.09	1.05	0.69	1.35	0.93	1.66	2.1	AI132487	mitochondrial hepatocellular
104923	39.16	30.13	37.26	51.47	37.2	35.45	35.95	36.67	33.52	43.53	47.03	40.08	25.02	28.48	21.75	26.98	25.13	40.24	40.82	48.39	Adi1	acireductone dioxygenase 1
104943	0.08	0	0.03	0.04	0	0	0.07	0	0	0	0	0.07	0.08	0.16	0.17	0	0.03	0	0	0.07	9030611O19Rik	hypothetical protein LOC104943
105000	0.79	0.54	1.24	1.39	0.32	1.28	1.4	1.22	1.02	1.25	1.67	0.98	6.29	2.14	2.18	4.64	2.21	0.58	2.05	0.42	Dnalc1	axonemal dynein light chain 1
105005	0.15	0	0.07	0.09	0.12	0	0.16	0	0	0	2.76	0	0	0.12	0	0	0	0.04	0.05	0.27	AW125753	expressed sequence AW125753
105014	24.53	13.7	19.98	21.3	16.94	12.47	12.27	23.06	20.09	20.23	17.67	16.25	12.96	9.26	9.68	9.35	13.1	23.29	22.1	16.9	Rdh14	alcohol dehydrogenase PAN2
105083	7.86	7.97	6.48	8.49	10.55	4.91	7.54	12.27	9.59	11.48	7.99	7.99	15.19	15.73	10.49	12.16	11.68	12.89	14.09	13.65	Pelo	pelota homolog,pelota homolog,
105148	13.64	14.83	13.89	16.69	17.09	15.35	13.46	15.63	13.12	11.82	10.81	13.38	12.66	13.49	13.79	12.43	13.2	17.92	17.87	16.17	Iars	isoleucyl-tRNA synthetase
105171	8.17	8.75	8.4	14.14	14.97	16.39	13.91	22.12	25.68	24.64	27.81	24.19	13.78	11.5	16.84	12.75	15.11	9.82	10.14	6.86	Arrdc3	arrestin domain containing 3
105193	3.21	3.08	3.67	3.14	2.85	2.13	2.85	2.57	2.58	1.38	1.49	0.87	2.48	1.7	0.35	1.52	2.02	4.63	6.58	5.57	Nhlrc1	NHL repeat containing 1
105243	0.02	0	0	0.09	0.04	0.06	0.09	0.05	0.07	0.12	0.02	0.05	0.04	0.08	0.17	0	0.07	0.14	0.02	0.16	Slc9a3	solute carrier family 9 (sodium/hydrogen
105245	14.79	18.68	14.5	14.31	15.53	9.71	8.9	27.91	17.86	14.97	14.46	14.69	60.92	50.03	39.27	44.8	49.9	22.05	25.16	23.6	Txndc5	thioredoxin domain containing 5,thioredoxin domain containing 5,thioredoxin domain containing 5,thioredoxin domain containing 5,
105246	14.53	17.46	12.38	13.58	12.47	13.24	13.7	15.04	12.01	11.35	10.15	11.16	11.7	10.68	11.23	12.85	10.9	13.71	17.25	15.76	Brd9	bromodomain containing 9,bromodomain containing 9,bromodomain containing 9,bromodomain containing 9,
105278	2.64	1.07	1.38	1.24	1.43	1.6	1.19	2.09	0.74	0.91	1.17	0.94	2.73	3.86	1.59	2.08	2.78	1.09	2.08	0.77	Ccrk	cell cycle related kinase
105298	4.59	6.44	5.42	5.39	4.2	6.17	5.82	7.99	7.21	5.48	6.06	4.83	8.81	5.41	4.19	6.18	6.88	6.93	8.62	7.74	Epdr1	ependymin 2
105348	2.54	4.84	3.32	5.36	6.78	8.78	9.46	5.2	4.25	3.94	3.53	4.67	10.07	8.32	5.48	7.27	7.26	4.9	5.62	4.78	Golm1	golgi membrane protein 1
105349	0	0	0	0	0.04	0	0	0.14	0	0	0	0	0	0	0	0	0	0	0.13	0	Akr1c18	aldo-keto reductase family 1, member C18,aldo-keto reductase family 1, member C18,
105351	7.18	7.62	4.52	7.72	9.42	14.58	11.44	5.13	4.99	6.77	5.64	6.83	5.77	4.57	2.3	6.32	4.86	7.76	9.85	7.2	AW209491	hypothetical protein LOC105351,hypothetical protein LOC105351,
105352	5.18	6.31	7.21	8.61	10.96	11.08	10.89	5.16	4.72	4.82	5.17	4.04	16.02	5.8	16.46	15.31	14.5	5.8	6.42	9.38	Dusp22	dual specificity phosphatase TS-DSP2 isoform b,dual specificity phosphatase TS-DSP2 isoform b,
105372	2.35	1.8	1.85	3.98	3.24	3.01	2.86	2.84	3.88	3.97	3.66	3.93	4.66	7.33	4.55	8.32	4.12	2.32	2.64	2.7	Utp15	UTP15, U3 small nucleolar ribonucleoprotein,
105377	4.85	4.04	5.82	5.97	4.18	7.34	6.66	1.45	3.41	3.83	3.87	4.88	1.36	2.22	3.98	3.19	2.63	3.2	3.02	3.09	Ankrd32	ankyrin repeat domain 32
105387	2.91	5.58	4.24	4.64	1.98	3.96	3.29	3.83	2.59	6.08	4.07	5.92	0.47	0.53	0.85	1.71	0.66	4.75	3.93	3.63	Akr1c14	aldo-keto reductase family 1, member C14
105418	0.12	0.07	0	0	0.06	0.07	0.06	0	0	0	0	0	0.13	0.31	0	0.19	0.02	0.09	0	0	E330034G19Rik	hypothetical protein LOC105418,hypothetical protein LOC105418,hypothetical protein LOC105418,
105428	8.04	9.68	6.63	7.98	5.85	2.67	3.84	8.65	6.33	5.58	8.63	5.92	7.71	4.54	4.35	7.57	5.88	10.99	9.72	10.02	AA536717	hypothetical protein LOC105428 isoform 2
105439	0	0	0	0	0.02	0	0	0	0	0	0	0	0	0	0	0	0.01	0	0	0	Slain1	SLAIN motif family, member 1,SLAIN motif family, member 1,
105440	25.87	20.73	25.61	36.82	29.44	55.99	40.57	19.27	23.64	31.79	24.19	32.48	22.36	26.25	33.2	28.51	27.33	22.98	21.32	21.84	Kctd9	potassium channel tetramerisation domain
105445	5.68	8.59	6.01	9.16	6.04	6.29	6.35	12.32	9.11	10.47	8.51	10.46	8.73	9.3	7.24	6.62	8.05	9.57	9.36	10.55	Dock9	dedicator of cytokinesis 9,dedicator of cytokinesis 9,dedicator of cytokinesis 9,dedicator of cytokinesis 9,
105446	6.01	5.89	7.18	9.48	9.96	12.45	12.45	13.4	12.12	14.54	17.22	14.09	13.63	12.71	11.64	12.58	12.79	8.02	7	4.67	Gmpr2	guanosine monophosphate reductase 2
105450	9.71	17.26	8.63	11.75	10.25	11.11	11.02	17.52	15.38	13.37	13.75	12.82	9.51	12.6	5.79	8.33	7.92	15.47	16.17	16.55	Mmrn2	elastin microfibril interfacer 3
105501	12.9	15.36	11.65	15.7	13.65	17.15	13.79	31.42	23.43	25.36	26.07	23.92	24.02	18.94	15.97	14.97	21.38	18.52	17.9	19.96	Abhd4	abhydrolase domain containing 4,abhydrolase domain containing 4,abhydrolase domain containing 4,
105504	4.81	6.28	6.2	7.79	5.83	8.25	7.35	3.92	8.62	11.87	7.93	14.56	13.82	25.19	25.72	23.5	22.59	4.63	4.05	3.37	Exoc5	exocyst complex component 5
105513	20.23	16.79	10.61	16.53	20.61	15.5	15.61	17.39	12.58	14.38	13.69	12.91	15.46	13.85	12.69	12.34	12.85	16.79	17.06	18.84	Chmp7	CHMP family, member 7
105522	8.53	9.03	8.3	9.21	7.5	8.58	6.68	6.03	8.65	9.08	7.24	10.11	13.13	18.63	11.19	16.6	15.64	8.09	7.83	8.52	Ankrd28	ankyrin repeat domain 28,ankyrin repeat domain 28,
105559	31.49	52.43	41.01	51.57	66.34	62.67	82.09	56.09	56	46.32	55.72	46.99	78.23	82.15	67.76	62.96	67.29	64.87	63.99	67.71	Mbnl2	muscleblind-like 2 isoform 2,muscleblind-like 2 isoform 2,
105590	0.08	0.07	0.28	0.09	0.15	0.05	0.03	0	0.14	0	0.07	0.1	0.1	0.03	0	0.09	0.09	0	0.03	0.05	AU017455	hypothetical protein LOC105590
105638	27.3	28	19.62	46.06	35.17	43.13	45.22	23.37	22.24	15.02	11.19	19.12	25.64	39.23	17.86	48.73	26.11	27.84	31.24	30.73	Dph3	zinc finger, CSL domain containing 2 isoform 1,zinc finger, CSL domain containing 2 isoform 1,
105653	8.86	6.49	6.74	6.4	7.91	3.6	3.89	7.56	6.25	4.88	5.91	4.3	8.04	9.16	3.84	7.66	7.47	8.42	11.23	12.46	Phyhip	phytanoyl-CoA hydroxylase interacting protein
105663	5.7	6.93	6.49	7.1	7.61	3.3	3.75	8.62	6.32	5.83	9.55	6.16	4.69	6.25	2.15	3.58	4.11	7.4	10.74	7.29	Thtpa	thiamine triphosphatase
105670	7.85	7.68	7.33	7.26	7.26	5.6	5.11	5.93	6.34	5.52	5.27	6.46	9.11	7.25	9.4	6.57	9.79	8.43	7.62	6.08	Rcbtb2	chromosome condensation 1-like,chromosome condensation 1-like,chromosome condensation 1-like,
105675	83.48	79.84	66.24	68.04	46.06	28.69	41.72	84.01	69.05	49.9	57.48	48.62	32.88	27.45	29.77	18.83	28.69	100.41	123.97	127.46	Ppif	peptidylprolyl isomerase F
105689	5.26	7.27	5.72	6.39	4.58	4.74	4.67	5.94	6.68	5.79	5.16	6.68	9.67	10.42	9.59	10.29	10.06	5.73	5.82	5.69	Phr1	pam, highwire, rpm 1,pam, highwire, rpm 1,
105722	4.78	6.92	4.46	6.55	6.51	4.57	4.75	5.99	6.51	6.48	5.01	6.84	17.78	19.74	17.09	16.7	17.73	6.93	5.59	6.77	Tmem16f	transmembrane protein 16F,transmembrane protein 16F,
105727	1.16	2.06	1.26	1.52	2.54	2.88	2.31	1.47	1.16	0.81	0.54	0.97	7.24	4.64	5.94	2.57	6.08	1.9	2.77	1.83	Slc38a1	solute carrier family 38, member 1,solute carrier family 38, member 1,solute carrier family 38, member 1,solute carrier family 38, member 1,solute carrier family 38, member 1,
105732	0.42	0.13	0.23	0.33	0.28	0.29	0.23	1.86	1.26	1.36	2.15	1.31	0.65	0.58	0.37	0.21	0.56	0.44	0.57	0.48	AA409316	hypothetical protein LOC105732,hypothetical protein LOC105732,
105734	0.67	0.52	0.46	0.97	0.51	0.35	0.34	1.49	1.07	1.01	1	0.67	1.26	1.37	0.98	0.57	0.81	1.05	0.97	1.33	Tigd5	tigger transposable element derived 5
105782	6.98	6.75	6.44	7.63	8.07	4.03	4.48	10.82	8.57	7.18	6.06	5.74	7.6	8.45	4.92	5.36	5.58	9.43	10.6	11.17	Scrib	PDZ-domain protein scribble,PDZ-domain protein scribble,PDZ-domain protein scribble,PDZ-domain protein scribble,
105785	4.21	1.98	3.68	3.16	2.87	1.59	2.71	3.29	2.21	3.32	3.47	3.52	17.39	13.02	10.92	15.23	17.46	3.52	4.17	3.54	Kdelr3	KDEL (Lys-Asp-Glu-Leu) endoplasmic reticulum
105787	4.67	9.09	6.68	8.1	9.16	6.43	8.89	8.58	6.57	10.26	7.96	7.91	13.19	12.17	11.8	9.86	13.33	8.71	7.32	7.52	Prkaa1	protein kinase, AMP-activated, alpha 1 catalytic
105827	1.65	1.6	0.99	2.39	1.78	2.02	1.95	2.2	2.07	1.37	1.7	1.2	2.04	1.6	3.17	1.19	2.03	2.84	2.1	2.01	Amigo2	amphoterin induced gene 2
105833	0.29	0.82	0.28	0.49	0.88	0.65	0.74	0.81	0.75	0.48	0.65	0.54	0.75	0.12	0.05	1.29	0.4	0.91	0.83	0.82	Ccdc65	coiled-coil domain containing 65
105835	5.19	4.14	5.03	4.41	5.02	2.43	2.57	5.94	4.79	3.81	3.26	3.44	4.27	3.63	3.45	3.37	3.46	5.71	6.3	6.25	Sgsm3	small G protein signaling modulator 3
105837	0.65	1.49	0.52	0.75	0.76	0.84	0.64	0.9	0.62	1.12	0.51	0.76	1.92	2.44	0.94	0.89	2.05	1.16	0.61	0.68	Mtbp	MDM2 Binding protein,MDM2 Binding protein,
105841	1.93	2.41	1.54	2.8	2.52	1.75	2.05	3.48	2.22	2.22	2.11	2.08	2	3.92	2.27	2.36	1.78	3.29	3.23	2.89	Dennd3	DENN/MADD domain containing 3
105844	5.74	4.34	3.81	6.89	7.2	5.15	6.96	11.27	7.48	7.51	5.92	5.47	5.67	6.17	2.49	3.6	3.98	9.32	8.75	9.91	Card10	caspase recruitment domain family, member 10,caspase recruitment domain family, member 10,
105847	9.29	8.28	8.75	8.89	9.15	5.71	6.54	16.67	10.84	10.25	10.43	8.52	17.54	17.14	10.38	9.69	13.37	13.77	13.07	13.88	Tmem112b	hypothetical protein LOC105847
105853	0	0	0	0	0	0	0	0.11	0	0	0	0	0	0	0	0	0	0.1	0	0	Mal2	MAL2 proteolipid protein
105855	0.98	1.91	1.2	0.99	2.22	0.9	0.97	2.15	1.26	0.92	1.39	0.87	15.59	11.3	24.47	12.34	16.21	1.41	1.85	1.13	Nckap1l	NCK associated protein 1 like,NCK associated protein 1 like,
105859	28.71	28.95	28.43	39.41	26.63	36.69	34.52	19.15	23.21	15.27	20.9	10.98	14.91	12.02	9.01	6.23	12.43	32.59	40.04	38.01	Csdc2	RNA-binding protein pippin
105866	0	0	0	0	0	0	0	0	0	0	0	0	0.03	0	0.02	0	0	0	0	0	Krt72	keratin 72
105887	0	0	0	0	0	0.02	0.02	0	0	0	0	0	0	0	0	0	0	0	0	0	Ugt3a1	UDP glycosyltransferases 3 family, polypeptide
105892	0	0	0	0	0	0.35	0	0	0	0	0	0	0	0	0	0	0.48	0.48	0.53	0	9030619P08Rik	RIKEN cDNA 9030619P08
105988	0.22	0.4	0.16	0.24	0.3	0.08	0.15	0.72	0.43	0.24	0.26	0.23	1.04	0.77	1.07	0.71	1.09	0.27	0.24	0.49	Espl1	extra spindle poles-like 1,extra spindle poles-like 1,
106014	2.17	1.1	2.34	1.78	1.57	1.57	0.95	3.52	3.4	3.73	2.06	1.83	8.27	4.52	1.9	4.1	5.32	1.85	4.1	5.46	AW049604	TAFA5 protein
106021	3.75	4.36	4.09	6.13	5.24	5.53	5.41	11.54	15.96	13.12	10.82	14.38	5.43	9.63	6.08	10.55	7.5	3.94	3.98	3.89	Topors	topoisomerase 1-binding RING finger
106025	12.72	11.13	11	10.62	13.46	6.83	7.24	26.83	16.19	16.96	17.66	15.31	15.77	16.49	5.23	13.31	13.82	14.25	17.47	19.2	Sharpin	SHANK-associated RH domain interacting protein
106039	23.16	18.94	20.3	26.92	26.91	14.51	18.1	39.88	22.79	21.46	24.11	16.2	26.06	22.39	18.91	16.14	20.12	28.36	32.81	34.39	Gga1	golgi associated, gamma adaptin ear containing,
106042	3.58	4.44	4.39	5.15	5.06	3.81	4.72	5.9	4.36	3.23	3.6	3.57	2.21	3.02	2.59	2.56	1.84	6.02	7.1	7.39	Prickle1	prickle like 1,prickle like 1,
106052	4.68	4.21	5.59	4.78	4.98	4.73	6.12	5.95	6.15	6.34	5.05	5.79	6.11	9.32	5.81	7.33	6.68	5.56	7.39	4.83	Fbxo4	F-box protein 4
106064	4.16	9.23	6.14	6.18	9.69	24.74	23.73	9.49	9.44	9.26	10.52	11.85	4.98	7.37	9.22	6.08	8.29	7.19	7.47	6.87	AW549877	hypothetical protein LOC106064,hypothetical protein LOC106064,
106068	3.85	5.54	4.55	5.44	5.51	3.42	3.3	6.52	4.49	5.04	4.94	4.19	10.36	7.86	7.47	6.59	7.45	4.97	8.02	7.2	Slc45a4	solute carrier family 45, member 4,solute carrier family 45, member 4,solute carrier family 45, member 4,
106073	9.03	7.47	8.23	7.45	11.36	8.07	12.7	20.48	12.39	11.76	14.54	10.51	15.69	15.59	11.61	14.44	13.54	12.93	15.74	15.71	D15Mgi27	hypothetical protein LOC106073
106143	6.8	13.04	11.34	15.32	15.6	8.03	4.75	19.69	13.99	15.79	18.86	15.12	20.83	29.7	20.75	20.62	20	12.19	14.57	13.44	Cggbp1	CGG triplet repeat binding protein 1,CGG triplet repeat binding protein 1,
106200	5.88	2.84	4.53	5.04	5.22	1.96	2.33	13	7.61	7.06	7.2	6.59	9.47	13.06	6.34	11.71	10.03	5.69	6.36	6.21	Txndc11	thioredoxin domain containing 11 isoform 1,thioredoxin domain containing 11 isoform 1,
106248	3.86	3.38	2.03	4.54	4.5	4.54	4.99	3.85	3.93	5.69	3.57	5.38	2.4	3.76	2.12	2	1.98	3.23	3.42	3.06	Qtrtd1	queuine tRNA-ribosyltransferase domain
106298	14.89	17.46	16.39	15.13	15.18	11.4	11.21	18.48	19.89	17.25	21.46	20.7	15.88	21.15	22.39	21.14	17.48	15.65	16.84	14.9	Rrn3	RRN3 RNA polymerase I transcription factor
106326	6.14	9.86	6.65	8.47	8.21	10.34	10.12	8.5	9.45	8.65	8.02	8.1	13.2	13.68	13.49	10.68	13.27	9.12	9.48	9.36	Osbpl11	oxysterol binding protein-like 11
106338	1.45	2.23	1.37	2.2	1.77	3.03	2.4	2.52	1.37	2.49	2.35	2.52	2.62	2.43	1.34	3.28	3.03	1.84	1.41	1.94	Nsun3	NOL1/NOP2/Sun domain family 3
106344	1.41	2.81	3.44	3.83	2.3	1.34	1.83	1.36	2.22	2.79	2.13	2.77	3.12	4.07	3.92	4.41	4.1	2.42	1.68	1.93	Rfc4	replication factor C (activator 1) 4
106347	0	0	0	0	0	0.02	0	0	0	0	0	0	0	0	0	0	0	0	0	0.07	Ildr1	immunoglobulin-like domain containing receptor
106369	0.29	0.27	0	0.12	0.12	0.26	0.31	0.81	0	0.27	0	0.1	0.64	0.23	0.41	0.36	0.61	0.35	0.96	0.83	Ypel1	yippee-like 1,yippee-like 1,
106389	0.81	0	0.26	0.1	0.77	0.47	0.58	0.38	1	0.49	0.33	0.27	0.74	1.48	0	1.15	0.24	0.16	0.89	0.38	Eaf2	ELL associated factor 2
106393	121.25	181.1	139.78	174.7	176.19	121.28	125.48	126.95	149.4	120.88	101.08	122.39	135.2	143	139.37	108.28	129.34	218.74	196.9	199.14	Srl	sarcalumenin,sarcalumenin,
106407	0.99	0.49	0.57	0.46	0.44	0.27	0.26	1.19	0.6	0.98	0.82	0.77	0.15	0.56	0.92	0.33	0.37	0.53	1	0.89	Osta	organic solute transporter alpha
106489	10.27	8.81	8.45	8.65	14.49	16.48	13.19	17.46	8.98	14.11	12.3	7.86	17.57	11.65	14.82	12.83	15.41	8.81	13.01	11.64	n/a	n/a
106504	5.58	9.63	10.85	12.79	14.11	13.45	15.39	9.42	12.21	12.02	10.32	12.31	15.57	18.2	19.48	19.2	19.61	10.77	10.16	9.36	Stk38	serine/threonine kinase 38,serine/threonine kinase 38,
106512	1.97	0.69	1.46	0.58	1.68	1.55	2	4.42	0.97	1.7	4.33	1.11	10.29	7.02	8.24	6.6	9.14	1.55	2.69	4.24	Gpsm3	G-protein signalling modulator 3 (AGS3-like, C.
106522	7.83	8.87	7.07	8.63	14.03	8.03	8.05	22.16	13.2	12.89	12.45	9.42	10.78	8.95	6.64	4.61	8.68	11.43	14.69	15.18	AW548124	hypothetical protein LOC106522
106529	295.52	290.07	270.48	227.19	261.34	248.48	271.92	309.67	232.11	229.35	235.7	195.12	110.01	129.13	62.77	100.56	90.28	294.94	322.71	355.65	Gpsn2	glycoprotein, synaptic 2,glycoprotein, synaptic 2,
106557	0.17	0.31	0.03	0.09	0.09	0.32	0.16	0.28	0.09	0.05	0.07	0.13	0.28	0.18	0.16	0.21	0.53	0.2	0.26	0.08	Ldhal6b	lactate dehydrogenase A-like 6B
106564	4.95	2.31	4.02	6.68	5.72	3.17	5.19	6.49	5	5.78	3.97	4.56	5.25	6.23	2.41	3.4	4.04	4.84	5.21	5.69	Ppcs	phosphopantothenoylcysteine synthetase
106565	0.56	0.05	0.09	0.23	0.14	0.15	0.38	0.49	0	0.53	0.14	0.21	0.26	1.24	0.38	0.14	0.14	0.45	0.35	0.5	Dlk2	EGF-like-domain, multiple 9,EGF-like-domain, multiple 9,EGF-like-domain, multiple 9,
106572	10.88	7.64	6.85	12.16	10.68	16.47	13.84	15.2	4.82	7.93	3.85	6.79	39.18	27.41	32.41	21.88	28.29	12.5	9.47	9.32	Rab31	Rab31-like
106581	37.52	44.21	35.91	36.63	44.44	23.87	29.71	53.17	36.28	31.7	35.49	33.32	38.28	27.61	28.06	33.89	32.54	53.52	53.99	54.21	Itfg3	integrin alpha FG-GAP repeat containing 3,integrin alpha FG-GAP repeat containing 3,
106582	2.02	1.26	1.38	2.31	2.78	2.09	1.54	2.59	1.82	2.14	1.91	1.96	4.32	5.06	2.14	4.41	3.44	2.03	2.89	2.77	Nrm	nurim
106585	2.49	2.57	3.2	6.57	4.58	6.18	6.62	6.26	7.63	8.34	7.82	10.77	5.09	7.53	8.31	6.44	6.08	4.13	4.13	3.19	Ankrd12	ankyrin repeat domain 12,ankyrin repeat domain 12,
106628	46.58	41.44	38.49	55.42	66.28	54.36	58.52	52.15	44.21	41.61	39.95	35.3	27.65	34.63	19.62	25.47	23.76	63.53	67.05	73.73	Trip10	thyroid hormone receptor interactor 10,thyroid hormone receptor interactor 10,thyroid hormone receptor interactor 10,thyroid hormone receptor interactor 10,
106633	1.91	2.69	1.67	2.05	2.03	2.26	2.17	2.54	1.84	1.66	1.01	1.49	2.27	2.28	1.22	1.05	1.95	3.43	3.48	2.8	Ift140	intraflagellar transport 140,intraflagellar transport 140,
106639	0.98	0.51	1.7	1.73	1.47	0.43	0.5	5.83	1.25	2.54	1.19	1.05	1.98	3.28	0.78	0.26	1.1	2.73	3.02	2.87	AI662250	vimentin-type IF-associated coiled-coil protein
106648	0.08	0.25	0.18	0.08	0.27	0.14	0.15	0.41	0.16	0.15	0.3	0.23	0.3	0.34	0.03	0.1	0.34	0.19	0.18	1.08	Cyp4f15	cytochrome P450, family 4, subfamily f,,cytochrome P450, family 4, subfamily f,,
106672	9.5	5.89	9.21	5.45	9.22	6.07	8.55	11.42	4.24	2.6	5.01	4.62	22.96	8.66	12.43	11.52	16.17	9.72	12.4	12.64	AI413582	hypothetical protein LOC106672
106707	2.78	2.97	1.82	2.38	2.42	0.82	1.25	4.44	3.61	3.41	2.65	2.94	4.04	3.73	4.47	3.27	4.49	3.58	4.8	3.44	Rpusd1	RNA pseudouridylate synthase domain containing,RNA pseudouridylate synthase domain containing,
106722	0	0	0	0	0	0	0	0	0	0	0	0	0	0	0	0	0	0.08	0	0	AU023871	hypothetical protein LOC106722
106759	5.25	7.83	7.8	6.8	7.81	6.77	6.96	8.98	6.41	6.44	4.43	5.44	6.48	4.14	4.22	2.36	4.89	5.23	7.24	6.37	Ticam1	TICAM-1,TICAM-1,
106766	9.48	11.71	9.15	9.18	7.94	9.18	9.83	12.9	12.57	7.78	8.19	6.51	7.8	5.61	7.82	4.61	8.31	13.34	12.48	14.58	Stap2	signal transducing adaptor family member 2
106794	2.44	3.13	2.52	3.1	2.77	2.42	2.25	3.66	2.27	2.7	3.14	2.78	3.82	2.96	2.48	2.14	3.22	3.11	2.86	2.68	Dhx57	DEAH (Asp-Glu-Ala-Asp/His) box polypeptide 57,DEAH (Asp-Glu-Ala-Asp/His) box polypeptide 57,DEAH (Asp-Glu-Ala-Asp/His) box polypeptide 57,
106795	0.89	1.47	0.65	1.2	1.58	0.47	0.41	2.78	0.73	0.89	0.87	0.81	3.39	3.2	1.2	1.46	2.23	1.84	1.17	2.02	Tcf19	transcription factor 19,transcription factor 19,
106821	12.47	11.48	9.8	16.84	17.45	14.53	15.12	9.34	13.63	9.78	9.42	15.99	7.44	13.14	25.02	9.13	9.15	12.05	16.87	10.14	AI314976	hypothetical protein LOC106821,hypothetical protein LOC106821,hypothetical protein LOC106821,
106840	5.6	5.41	3.67	6.37	11.21	1.67	3.32	9.73	9.18	7.77	5.94	5.55	11.21	12.76	10.05	6.92	9.34	6.54	5.66	5.42	Unc119b	unc-119 homolog B
106861	1.32	0.76	1.95	1.21	1.85	1.68	1.68	1.39	2.1	0.82	1.05	0.77	1.13	0.76	0.48	2.06	1.48	1.84	2.8	2.35	Abhd3	abhydrolase domain containing 3
106869	16.28	27.42	15.72	14.54	17.55	19.82	20.49	16.64	15.02	11.66	10.37	12.37	12.78	8.99	11.27	8.01	12.11	25.85	25.1	20.43	Tnfaip8	tumor necrosis factor, alpha-induced protein 8
106877	27.36	29.88	22.29	26.67	28.9	12.01	14.02	35.36	26.26	24.01	22.73	21.81	24.34	28.15	14.94	18.83	19.7	37.2	40.91	46.93	Afap1l1	actin filament associated protein 1-like 1
106878	0.43	1.18	1.46	2.33	1.57	2.99	2.92	2.39	0.96	1.95	1.83	1.55	6.08	10.09	2.59	2.09	5.41	2.03	0.84	2.43	2010002N04Rik	putative small membrane protein NID67
106894	3.94	5.14	4.38	4.63	5.65	5.86	5.63	7.84	6.35	5.86	5.59	5.59	5.12	5.41	5.07	3.84	4.08	6.18	7.61	6.69	A630042L21Rik	hypothetical protein LOC106894 isoform 2,hypothetical protein LOC106894 isoform 2,
106931	4.03	5.11	4.86	4.82	4.05	2.52	4.45	6.6	3.56	5.44	5.14	3.86	3.25	2.53	3	2.15	3.44	6.08	4.37	5.83	Kctd1	potassium channel tetramerisation domain,potassium channel tetramerisation domain,potassium channel tetramerisation domain,
106947	4.8	1.65	3.22	6.38	8.25	2.51	3.67	6.45	3.9	4.32	2.54	2.35	4.47	3.32	1.47	2.67	3.15	6.38	7.63	5.8	Slc39a3	solute carrier family 39 (zinc transporter),,solute carrier family 39 (zinc transporter),,solute carrier family 39 (zinc transporter),,
106952	10.51	11.47	8.78	10.39	9.46	9.25	8.8	17.18	10.06	12.61	12.29	9.45	8.62	7.5	5.01	5.5	6.37	15.83	15.24	16.5	Centd3	centaurin, delta 3,centaurin, delta 3,centaurin, delta 3,centaurin, delta 3,
106957	1.08	1.64	1.76	1.65	1.96	1.03	1.26	1.83	1.38	1.2	1.31	1.58	8.09	8.46	8.98	8.6	9.51	1.78	1.91	1.48	Slc39a6	solute carrier family 39 (metal ion
107022	5.99	6.33	6.57	6.68	6.7	3.83	5.39	5.41	4.67	3.93	5.47	5.82	10.02	8.24	10.72	8.27	8.56	8.09	6.9	7.51	Gramd3	GRAM domain containing 3,GRAM domain containing 3,GRAM domain containing 3,
107029	5.64	3.98	5.46	4.4	7.48	10.1	8.08	5.18	5.04	6.46	5.14	7.13	9.46	8.43	10.28	8.54	10.06	4.44	3.95	5.06	Me2	malic enzyme 2, NAD(+)-dependent, mitochondrial
107035	5.21	6.11	4.81	7.29	7.03	5.97	7.27	8.36	8.37	7.9	7.73	8.57	9.65	9.71	9.39	10.36	10.34	7.79	8.81	8.28	Fbxo38	MoKA,MoKA,
107045	19.46	16.64	14.03	23.19	20.23	19	18.75	17.49	16.02	19.51	16.09	19.95	19.91	20.16	21.56	21.29	19.39	19.14	22.33	18.39	Lars	leucyl-tRNA synthetase
107047	18.85	12.92	15.69	16.99	8.59	8.21	8.76	14.7	10.99	12.52	12.62	15.17	11.78	13.03	10.99	12.52	14.07	14.15	16.06	15.47	Tnfsf5ip1	Clast3 protein
107065	0	0	0.18	0.28	0.41	0.35	0.35	0.06	0.09	0.23	0.62	0.44	0.09	0.26	0.1	0.18	0.16	0.13	0.17	0.12	Lrrtm2	leucine rich repeat transmembrane neuronal 2
107071	6.71	9.15	5.14	7.54	10.03	5.79	5.96	14.58	11.89	10.07	11.94	10.41	12.28	12.34	6.17	10.1	9.43	7.42	10.44	7.89	Wdr74	WD repeat domain 74
107094	6.11	5.91	5.86	8.52	14.12	6.32	7.86	14.84	9.29	12.11	9.09	9.75	15.51	22.2	13	15.81	13.36	8.88	11.32	9.94	Rrp12	ribosomal RNA processing 12 homolog
107173	11.03	12.13	11.57	9.15	15.14	6.5	7.73	14.76	13.02	9.11	9.8	7.16	13.88	10.57	9.1	8.26	11.4	15.98	19.33	20.08	Gpr137	expressed sequence AI428855
107182	2.36	3.78	3.84	4.74	3.87	3.71	3.68	3.96	6.23	6.51	5.92	7.02	3.81	5.62	6.85	5.1	4.86	2.54	2.66	2.37	Btaf1	BTAF1 RNA polymerase II, B-TFIID transcription
107221	0	0	0	0	0.05	0.06	0	0.18	0.1	0	0	0	0	0	0.36	0	0	0	0.17	0	Gpr120	G protein-coupled receptor 120
107227	130.26	66.6	86.87	120.7	155.22	96.4	115.42	141.65	92.7	103.53	95.12	69.81	34.27	42.9	23.33	30.9	25.88	124.43	145.2	158.95	Macrod1	LRP16 protein
107250	2.27	0.87	0.93	1.17	0.83	1.35	1.39	2.7	0.35	1.23	0.39	0.88	1.94	1.05	0.92	0.72	1.51	1.64	2.13	2.08	Kazald1	Kazal-type serine peptidase inhibitor domain 1,Kazal-type serine peptidase inhibitor domain 1,
107260	37.99	33.14	27.51	44.6	40.89	33.7	33.1	51.38	46.46	49.14	35.32	37.81	54.9	64.74	41.63	51.83	46.47	46.04	52.24	48.8	Otub1	otubain 1
107271	13.16	14.76	12.48	17.17	16.83	16.68	15.98	25.1	16.6	15.74	13.02	17.41	19.58	20.66	21.23	14.11	18.31	17.84	17.11	18.61	Yars	tyrosyl-tRNA synthetase
107272	0.52	1.68	0.15	1.02	1.3	0.49	0.8	2.44	0.89	1.3	0.92	1.24	4.04	4.12	2.11	3.93	3.38	0.94	0.47	1.13	Psat1	phosphoserine aminotransferase 1,phosphoserine aminotransferase 1,phosphoserine aminotransferase 1,
107305	8.23	7.29	7.1	5.48	6.27	3.25	6.58	11.39	7.24	6.29	7.81	5.01	13.12	12.23	9.88	7.79	8.15	9.45	11.92	11.41	Vps37c	vacuolar protein sorting 37C,vacuolar protein sorting 37C,
107321	0.33	0.2	0.14	0.06	0.69	0.13	0.16	0.86	0	0.13	0.18	0.31	6.3	5.16	4.28	4.68	5.31	0.48	0.34	0.26	Lpxn	leupaxin
107338	7.93	13.08	9.6	11.54	10.96	11.15	10.83	23.57	17.26	17.82	17.74	17.4	11.62	11.08	10.64	8.72	9.73	14.13	16.72	14.77	Gbf1	golgi-specific brefeldin A-resistance factor 1,golgi-specific brefeldin A-resistance factor 1,golgi-specific brefeldin A-resistance factor 1,golgi-specific brefeldin A-resistance factor 1,
107351	8.33	12.69	8.31	15.76	17.16	18.3	17.74	16.13	13.58	13.66	11.75	13.46	15.24	16.63	11.16	12.31	12.46	16.16	17.43	17.35	Ankrd15	ankyrin repeat domain 15,ankyrin repeat domain 15,ankyrin repeat domain 15,
107358	18.8	19.13	22.01	23.15	21.79	24.32	23.16	13.34	26.44	25.35	17.63	26	34.83	44.13	51.12	48.42	45.62	17.12	17.99	16.5	Tm9sf3	transmembrane protein 9 superfamily member 3
107368	2.43	4.84	4.28	6.51	5.57	6.41	7.19	5.34	5.83	5.86	4.75	6.15	6.47	9.56	6.58	5.93	6.52	5.72	5.39	5.33	Pdzd8	PDZ domain containing 8
107371	12.76	13.42	12.54	14.99	12.06	12.84	12.51	10.45	14.69	12.87	13.68	14.62	14	11.25	12.66	14.35	14.52	13.26	12.99	11.44	Exoc6	exocyst complex component 6,exocyst complex component 6,
107373	2.09	1.91	2.65	2.27	2.23	3.16	3.05	1.35	2.96	3.07	2.3	3.48	5.16	6.37	8.9	5.87	7.86	1.72	0.75	0.99	4632417K18Rik	hypothetical protein LOC107373
107375	1.7	3.46	1.36	1.92	2.4	0.76	0.76	2.69	1.44	2.46	2.6	1.94	5.96	5.22	4.44	1.65	4.92	3.66	2.41	3.56	Slc25a45	solute carrier family 25, member 45,solute carrier family 25, member 45,
107392	10.49	7.58	6.14	12.87	14.16	11.19	12.34	16.39	12.4	10.73	8.13	10.26	14.76	18.89	10.61	14.01	12.1	8.22	13.61	13.71	Brms1	breast cancer metastasis-suppressor 1
107435	8.39	6.58	7.33	10.91	12.49	19.73	15.81	6.82	8.98	9.12	9.15	11.17	13.4	16.97	16.2	22.67	17.62	6.82	5.73	5.54	Hat1	histone aminotransferase 1,histone aminotransferase 1,
107448	0.03	0.16	0.01	0.06	0.17	0.05	0.1	0.29	0	0.33	0	0.1	0.16	0.14	0.21	0.38	0.23	0.12	0.21	0.1	Unc5a	netrin receptor Unc5h1,netrin receptor Unc5h1,
107449	3.65	5.63	4.72	4.19	5.5	2.83	3.5	9.66	4.48	4.79	4.8	3.9	8.15	9.26	6.74	5.2	6.71	6.99	6.68	8.7	Unc5b	unc-5 homolog B,unc-5 homolog B,unc-5 homolog B,
107476	1.24	2.04	1.8	1.89	2.26	2.25	2.23	2.35	2.13	2	1.65	2.03	2.63	2.96	2.07	3.3	2.73	2.05	2.43	1.73	Acaca	acetyl-Coenzyme A carboxylase alpha
107477	0	0	0	0.05	0	0	0.05	0.66	0	0	0	0.18	0	0	0	0	0.08	0	0	0	Guca1b	guanylate cyclase activator 1B
107503	35.08	13.18	30.09	20.61	27.76	17.46	15.11	32.66	10.2	8.8	16.86	7.55	22.72	7.44	9.92	10.29	14.46	24.05	27.49	23.72	Atf5	ativating transcription factor 5,ativating transcription factor 5,
107508	24.67	26.45	22.86	29.74	27.57	29.6	28.12	21.97	26.59	27.8	18.55	31.09	28.98	42.07	32.66	33.25	31.42	31.13	31.34	27.06	Eprs	glutamyl-prolyl-tRNA synthetase,glutamyl-prolyl-tRNA synthetase,glutamyl-prolyl-tRNA synthetase,
107513	19.55	19.95	19.75	25.58	25.53	27.93	30.73	27.91	26.16	33.26	19.43	30.88	45.13	69.96	53.45	60.19	51.19	21.81	20.43	19.14	Ssr1	signal sequence receptor, alpha,signal sequence receptor, alpha,
107515	4.83	6.57	6.32	6.14	7.28	5.34	5.26	8.91	8.21	7.35	5.91	6.81	10.05	12.23	10.81	13.36	10.76	7.33	7.54	7.24	Lgr4	G protein-coupled receptor 48
107527	0.21	0.38	0.25	0.68	1.18	0.85	0.43	0.68	0.76	0.51	0.96	0.74	2.07	1.52	4.98	1.63	2.4	0.57	0.64	0.56	Il1rl2	interleukin 1 receptor-like 2,interleukin 1 receptor-like 2,
107528	1.52	1.97	1.61	1.56	2.61	1.38	1.3	2.35	1.61	1.96	1.2	1.43	3.55	4.66	2.49	4.21	3.56	2.27	2.71	1.97	Magee1	melanoma antigen, family E, 1
107566	37.05	39.45	31.25	41.17	39.55	35.63	32.16	32.63	36.04	35.87	38.37	37.17	46.8	53.67	31.39	63.36	48.47	39.23	41.51	39.37	Arl2bp	ADP-ribosylation factor-like 2 binding protein
107568	16.38	16.17	17.82	26.41	18.86	19.25	19.79	10.73	16.25	18.14	14.51	21.98	20.35	21.66	31.89	20.95	25.56	15.76	13.74	14.64	Wwp1	WW domain-containing protein 1
107569	17.47	19.67	25.2	31.1	17.27	22.53	25.25	16.35	30.43	40.6	28.88	46.3	13.12	19.36	23.17	18.86	16.76	17.18	15.6	14.01	Nt5c3	5'-nucleotidase, cytosolic III,5'-nucleotidase, cytosolic III,
107581	3.09	3.19	2.46	3.02	3.58	1.44	1.62	6.48	3.57	3.83	3.63	2.84	11.11	13.06	8.38	8.48	9.71	3.66	4.34	4.32	Col16a1	procollagen, type XVI, alpha 1,procollagen, type XVI, alpha 1,
107585	0	0	0	0.06	0.09	0	0	0.1	0	0	0.13	0.05	4.41	5.43	5.56	2.81	3.03	0	0	0.1	Dio3	deiodinase, iodothyronine type III
107586	0	0	0	0	0	0	0	0.14	0	0	0	0	0	0	0	0	0	0	0	0	Ovol2	ovo-like 2 isoform A
107589	3.34	4.27	3.08	5.25	5.17	3.86	4.7	5.28	4.73	5.21	3.31	5.06	5.48	6.29	4.5	4.47	4.61	5.9	5.83	5.11	Mylk	myosin, light polypeptide kinase,myosin, light polypeptide kinase,
107605	0	0	0	0.24	0.32	0.2	0.11	1.14	0.99	0.78	1.14	0.87	0.13	0	0	0.05	0.21	0.09	0	0.06	Rdh1	retinol dehydrogenase 1 (all trans)
107607	5.54	7.12	5.12	5.93	5.05	3.17	3.88	9.67	6.54	5.28	5.76	4.97	4.98	3.82	4.68	2.87	4.21	8.23	8.88	10.7	Nod1	nucleotide-binding oligomerization domain,nucleotide-binding oligomerization domain,
107650	6.94	8.81	8.39	9.19	6.86	5.68	5.78	15.13	12.15	11.56	9.73	11.29	12.69	10.55	9.54	10.16	10.51	11.05	13.07	12.44	Pi4kb	phosphatidylinositol 4-kinase, catalytic, beta,phosphatidylinositol 4-kinase, catalytic, beta,phosphatidylinositol 4-kinase, catalytic, beta,
107652	17.08	22.84	15	21.26	27.68	14.8	15.99	22.42	24.96	25.26	17.57	24.61	34.98	43.9	28.03	43.96	34.92	22.21	19.25	17.58	Uap1	UDP-N-acetylglucosamine pyrophosphorylase 1,UDP-N-acetylglucosamine pyrophosphorylase 1,UDP-N-acetylglucosamine pyrophosphorylase 1,UDP-N-acetylglucosamine pyrophosphorylase 1,
107684	0	0.05	0.13	0.1	0.15	0.12	0.06	0.41	0.2	0.15	0.03	0.11	2.42	1.76	2.88	1.17	1.66	0.06	0.1	0.11	Coro2a	coronin, actin binding protein 2A,coronin, actin binding protein 2A,coronin, actin binding protein 2A,
107686	83.28	73.96	57.29	81.71	113.53	202.39	155.76	118.61	59.63	49.93	70.5	45.08	63.56	54.47	42.11	77.91	54.9	89.73	86.68	101.88	Snrpd2	small nuclear ribonucleoprotein D2
107701	7.33	6.39	6.73	7.17	7.9	4.44	4.99	21.43	13.15	11.45	14.01	9.21	15.3	16.52	10.51	11.03	13.82	10.05	11.92	11.99	Sf3b4	splicing factor 3b, subunit 4
107702	29.64	33.03	25.21	29.73	26.65	14.61	16.46	40.5	28.12	27.01	29.93	24.09	110.56	84.19	76.15	79.71	86.33	32.12	43.08	40.92	Rnh1	ribonuclease/angiogenin inhibitor 1,ribonuclease/angiogenin inhibitor 1,ribonuclease/angiogenin inhibitor 1,
107723	6.17	7.96	7.24	7.5	6.85	9.52	8.52	7.25	7.56	7.43	7.42	8.18	8.81	7.41	10.25	7.85	9.22	9.03	9.53	7.63	Slc12a6	solute carrier family 12, member 6 isoform 2,solute carrier family 12, member 6 isoform 2,solute carrier family 12, member 6 isoform 2,solute carrier family 12, member 6 isoform 2,
107732	26.5	29.02	21.66	25.23	35.13	20.43	24.83	44.55	26.83	25.72	23.12	23.84	17.82	16.21	12.15	16.57	16.4	33.93	42.47	48.32	Mrpl10	mitochondrial ribosomal protein L10
107733	33.87	34.66	24.04	30.91	46.22	87.01	80.83	43.12	23.79	31.79	17.89	30	24.42	29.48	14.55	25.72	18.05	38.62	38.64	36.21	Mrpl41	mitochondrial ribosomal protein L41
107734	148.26	139.04	128.65	141.62	100.67	90.02	86.64	112.85	81.06	96.64	109.01	101.09	71.49	58.6	66.46	88.87	70.93	127.52	133.11	121.66	Mrpl30	mitochondrial ribosomal protein L30
107746	20.23	33.29	23.13	29.29	30.75	23.4	29.95	33.6	31.5	30.8	28.95	28.64	54.94	60.12	35.65	50.63	46.43	37.54	37	41.06	Rapgef1	Rap guanine nucleotide exchange factor (GEF) 1
107747	2.25	2.55	1.56	1.86	1.67	2.14	1.76	2.42	1.61	2.03	1.74	1.6	1.8	1.21	0.43	0.76	1.25	2.52	2.19	1.51	Aldh1l1	aldehyde dehydrogenase 1 family, member L1,aldehyde dehydrogenase 1 family, member L1,
107751	0	0.13	0	0	0	0	0	0	0	0.13	0	0.09	0	0	0	0	0	0	0.09	0	Prrxl1	paired related homeobox protein-like 1
107753	0.91	0.83	0.33	0.7	0.55	0.39	0.24	1.41	0.84	1.44	0.28	0.97	0.25	0.35	0.94	0	0.27	0.4	0.89	1.12	Lgals2	lectin, galactose-binding, soluble 2
107765	378.77	340.38	298.62	673.34	926.29	345.49	363.29	898.48	478.5	812	729.17	854.42	1665.25	1365.54	1235.65	1324.48	1566.64	517.24	638.38	1031.86	Ankrd1	ankyrin repeat domain 1 (cardiac muscle)
107766	0.06	0	0.12	0.15	0.05	0.05	0	0.09	0	0.11	0	0.04	0.41	0	0.23	0.08	0.07	0	0	0	Haao	3-hydroxyanthranilate 3,4-dioxygenase,3-hydroxyanthranilate 3,4-dioxygenase,
107767	9.95	11.36	8.9	11.76	12.5	10.65	11.88	17.94	12.91	13.68	13.81	12.39	13.86	12.69	10	13.56	11.37	14.3	15.07	15.01	Scamp1	secretory carrier membrane protein 1,secretory carrier membrane protein 1,secretory carrier membrane protein 1,
107769	3.3	2.6	3.61	2.54	5.27	3.52	3.27	2.66	3.53	2.73	2.08	2.81	14.25	6.06	12.33	9.63	15.18	3.99	3.17	3.19	Tm6sf1	transmembrane 6 superfamily member 1,transmembrane 6 superfamily member 1,transmembrane 6 superfamily member 1,
107770	0.86	0.9	0.52	0.41	0.73	0.64	0.52	1.7	0.42	0.37	0.35	0.4	0.22	0.45	0.23	0.4	0.19	0.58	0.59	0.86	Tm6sf2	transmembrane 6 superfamily member 2,transmembrane 6 superfamily member 2,
107771	6.34	2.68	5.82	8.11	6.18	2.49	3.14	11.09	5.53	3.87	2.92	2.78	7.75	8.01	3.52	5.91	6.51	8.34	11.85	13.75	Bmyc	brain expressed myelocytomatosis oncogene
107815	0.1	0.06	0.1	0.13	0.26	0.34	0.24	1.58	0.4	0.53	0.77	0.39	1.15	0.19	0.16	0.12	0.53	0.08	0.16	0.29	Scml2	sex comb on midleg-like 2,sex comb on midleg-like 2,sex comb on midleg-like 2,
107817	16.59	14.82	11.91	18.06	21.76	16.72	15.85	32.02	26.19	22.23	19.47	19.1	17.84	22.54	17.3	20.65	17.47	21.36	24.36	19.9	Jmjd6	jumonji domain containing 6
107823	2.44	5.95	2.38	3.26	4.16	3.9	3.5	4.87	4.9	4.92	5.33	5.98	5.45	7.1	4.79	7.11	5.88	3.57	2.96	3.34	Whsc1	Wolf-Hirschhorn syndrome candidate 1,Wolf-Hirschhorn syndrome candidate 1,Wolf-Hirschhorn syndrome candidate 1,
107829	7.89	9.36	7.25	8.14	10.17	6.63	7.52	8.63	6.33	7.67	7.77	6.92	10.16	8.43	7.46	7.22	8.8	9.27	9.04	10.58	Thoc5	THO complex 5
107831	0.02	0.02	0	0.04	0.06	0.03	0.04	1.1	0.52	0.83	1.04	0.61	0.11	0.15	0	0.04	0.09	0.02	0	0.05	Bai1	brain-specific angiogenesis inhibitor 1,brain-specific angiogenesis inhibitor 1,brain-specific angiogenesis inhibitor 1,brain-specific angiogenesis inhibitor 1,brain-specific angiogenesis inhibitor 1,
107849	0	0	0	0	0	0	0	0	0	0	0.31	0.04	0.56	0.3	1.78	0.78	2.1	0	0	0	Prl2c5	prolactin family 2, subfamily c, member 5
107868	0.01	0	0	0.01	0.01	0.01	0.01	0	0.01	0	0	0.01	0	0.01	0	0.02	0	0	0	0	Usp9y	ubiquitin specific peptidase 9, Y chromosome
107869	0.6	0.58	0.81	1.11	0.84	1.52	1.58	2.26	1.12	1.51	1.98	1.47	0.09	0.25	0.04	0.1	0.02	1.08	0.99	1.57	Cth	cystathionase
107885	11.26	5.63	11.47	10.15	9.05	15.13	10.98	11.24	12.01	8.67	6.73	9.8	14.69	9.42	11.92	10.45	14.86	11.57	12.41	11.01	Mthfs	5, 10-methenyltetrahydrofolate synthetase,5, 10-methenyltetrahydrofolate synthetase,5, 10-methenyltetrahydrofolate synthetase,5, 10-methenyltetrahydrofolate synthetase,5, 10-methenyltetrahydrofolate synthetase,
107895	1.55	2.17	2.06	2.45	1.79	2.12	2.06	2.98	2.1	2.44	0.91	1.92	3.92	3.98	5.64	2.35	3.09	3.23	3.13	3.25	Mgat5	mannoside acetylglucosaminyltransferase 5,mannoside acetylglucosaminyltransferase 5,mannoside acetylglucosaminyltransferase 5,mannoside acetylglucosaminyltransferase 5,
107932	35.76	43.67	33.65	47.21	51.56	52.52	53.62	45.66	42.38	46.21	38.53	44.18	48.07	54.35	46.62	41.67	43.72	47.63	48.85	50.18	Chd4	chromodomain helicase DNA binding protein 4,chromodomain helicase DNA binding protein 4,
107934	0.11	0.15	0.03	0.11	0.07	0.08	0.16	0.11	0.11	0.03	0.09	0.05	0.26	0.38	0.19	0.26	0.17	0.12	0.12	0.17	Celsr3	cadherin EGF LAG seven-pass G-type receptor 3,cadherin EGF LAG seven-pass G-type receptor 3,
107939	2.92	4.13	4.82	3.63	4.63	4.35	4.14	15.21	11.5	9.1	8.61	7.12	7.36	10.78	4.21	7.07	5.74	6.08	7.03	8.37	Pom121	nuclear pore membrane protein 121
107951	13.69	16.86	12.38	14.7	13.86	8.49	8.53	30.13	17.72	21.38	22.68	18.04	29.44	25.39	16.03	24.3	20.54	17.21	21.07	19.26	Cdk9	cyclin-dependent kinase 9,cyclin-dependent kinase 9,
107970	0	0	0	0.04	0	0	0	0.07	0.4	0.58	0.13	0.35	0.12	0	0	0	0.06	0	0	0	Hist1h1t	histone 1, H1t
107971	2.96	1.12	2.21	2.13	3.21	0.96	1.73	3.05	1.63	2	2.29	1.44	1.33	1.79	0.95	0.98	0.88	2.85	3.8	3.18	Frs3	fibroblast growth factor receptor substrate 3
107975	6.28	10.5	7.33	7.6	6.02	6.36	5.96	9.98	7.45	6.59	7.11	6.8	9.43	10.87	7.09	10.63	8.44	11.3	11.3	10.45	Pacs1	phosphofurin acidic cluster sorting protein 1,phosphofurin acidic cluster sorting protein 1,phosphofurin acidic cluster sorting protein 1,
107976	17.42	13.71	16.14	16.31	17.34	16.67	23.16	12.44	8.94	12.78	13.56	14.04	24.04	17.63	17.18	30.05	22.15	21.91	20.42	13.11	Bre	brain and reproductive organ-expressed protein,brain and reproductive organ-expressed protein,
107986	4.3	2.64	3.29	3.08	3.82	3.24	3.04	2.84	3.88	3.54	3.31	3.6	3.43	3.62	4.38	2.57	4.63	4.08	3.95	2.89	Ddb2	damage specific DNA binding protein 2
107993	0.18	0.11	0.15	0.31	0.27	0.21	0.22	0.77	0.5	0.72	0.37	0.4	0.1	0.1	0	0.04	0	0.25	0.12	0.52	Bfsp2	beaded filament structural protein 2, phakinin,beaded filament structural protein 2, phakinin,
107995	0.69	1.67	0.81	0.92	0.72	0.92	0.91	2.34	1.23	1.51	0.84	1.31	3.58	3.63	3.56	6.42	3.02	1.01	0.4	1.21	Cdc20	cell division cycle 20 homolog,cell division cycle 20 homolog,
107999	5.39	3.8	5.82	7.8	11.44	4.08	4.87	11.79	5.57	4.89	7.27	3.31	8.09	7.7	3.78	5.99	5.43	7.65	7.77	10.47	Gtpbp6	GTP binding protein 6 (putative)
108000	2.23	4.23	3.71	3.41	1.24	3.29	3.1	1.16	2.07	1.73	1.62	2.07	0.71	1.31	1.59	1.31	0.96	2.66	1.76	1.97	Cenpf	centromere protein F,centromere protein F,centromere protein F,
108011	1.53	1.55	1.93	2.68	2.24	2.43	2.31	1.69	2.17	2.77	2.81	2.83	2.89	4.16	3.47	3.91	3.84	1.94	1.47	1.64	Ap4e1	adaptor-related protein complex AP-4, epsilon 1,adaptor-related protein complex AP-4, epsilon 1,
108012	9.02	7.13	14.61	13.43	11.19	15.34	10.6	9.79	13.49	16.19	11.2	17.75	17.17	14.94	15.22	22.44	28.81	8.99	5.83	6.56	Ap1s2	adaptor-related protein complex 1 sigma 2,adaptor-related protein complex 1 sigma 2,
108013	0	0	0	0.29	0	0	0	0	0	0	0	0.08	1.52	1.19	0.59	0	0.67	0	0	0	Brunol4	bruno-like 4, RNA binding protein,bruno-like 4, RNA binding protein,bruno-like 4, RNA binding protein,bruno-like 4, RNA binding protein,
108014	12.6	16.29	10	12.68	15.03	7.96	10.82	21.13	16.15	15.75	9.97	13.44	18.99	19.19	14.49	15.5	18.64	14.43	14.33	13.79	Sfrs9	splicing factor, arginine/serine rich 9
108015	0	0	0	0.04	0	0	0	0	0	0	0	0	0	0	0	0	0	0	0	0	Chrnb4	cholinergic receptor, nicotinic, beta,cholinergic receptor, nicotinic, beta,
108017	0	0	0	0	0	0	0	0	0	0	0	0	0.69	0	0	0	0.8	0	0	0	Fxyd4	corticosteroid-induced protein,corticosteroid-induced protein,
108030	0	0	0.67	1.34	0.28	1.05	0.74	0.48	2.31	0.94	0	0.68	0.38	1.08	0.32	0.63	0.2	1.23	0.91	0.24	Lin7a	lin 7 homolog a isoform 1
108037	14.54	15.39	13.33	14.4	16.56	11.81	13.07	27.71	17.69	17.19	19.59	14.13	14.33	14.38	8.33	11.99	9.84	21.36	21.15	24.99	Shmt2	serine hydroxymethyltransferase 2,serine hydroxymethyltransferase 2,
108052	0	0	0	0	0.15	0.06	0	0.1	0	0	0	0	0.08	0	0	0	0.02	0	0	0	Slc14a1	solute carrier family 14 (urea transporter),,solute carrier family 14 (urea transporter),,
108058	35.37	52.34	40.43	44.57	27.81	28.9	33.28	40.49	38.83	31.67	25.31	33.63	41.87	51.8	37.97	53.43	39.28	54.11	55.25	59.53	Camk2d	calcium/calmodulin-dependent protein kinase II,,calcium/calmodulin-dependent protein kinase II,,calcium/calmodulin-dependent protein kinase II,,
108062	3.34	4.84	3.27	4.28	3.15	4	3.42	3.88	4.43	3.37	2.8	3.97	5.97	5.6	4.21	5.2	4.21	5.46	6.14	4.65	Cstf2	cleavage stimulation factor, 3' pre-RNA subunit,cleavage stimulation factor, 3' pre-RNA subunit,cleavage stimulation factor, 3' pre-RNA subunit,
108067	5.86	7.01	8.16	8.54	13.3	9.24	14.93	8.29	7.51	10.03	5.92	11.36	11.92	13.13	8.77	17.71	14.02	7.54	10.13	8.04	Eif2b3	eukaryotic translation initiation factor 2B,
108069	0.03	0	0	0.02	0	0	0	0	0	0	0.05	0	0.03	0	0	0	0	0	0.03	0	Grm3	glutamate receptor, metabotropic 3
108072	0	0.05	0	0	0	0	0	0	0	0	0.02	0	0	0	0	0	0	0	0	0	Grm6	glutamate receptor, metabotropic 6,glutamate receptor, metabotropic 6,
108073	0.04	0.05	0.34	0.1	0.04	0.1	0.12	0.06	0.04	0.19	0.08	0.23	0.04	0.12	0	0.05	0.05	0.05	0.14	0.06	Grm7	glutamate receptor, metabotropic 7
108075	61.41	62.25	56.78	68.15	86.53	49.33	56.13	142.82	93.72	84.19	82.8	61.41	45.69	43.72	27.13	25.22	34.11	120.35	133.14	121.3	Ltbp4	latent transforming growth factor beta binding,latent transforming growth factor beta binding,latent transforming growth factor beta binding,
108077	8.46	7.24	6.5	9.27	10.14	5.25	6.37	15.2	11.66	11.31	10.38	9.87	14.5	13.75	10.06	12.02	9.84	12.16	14.24	14.18	Skiv2l	superkiller viralicidic activity 2-like
108078	0	0	0	0	0	0	0	0.05	0.23	0.14	0.05	0.03	1.83	0.43	1.2	0.95	1.73	0	0	0	Olr1	oxidized low density lipoprotein (lectin-like)
108079	11.13	23.35	15.65	25.2	24.84	14.36	15.04	20.25	22.48	20.14	21.33	22.25	17.39	23.58	16.89	18.13	16.18	20.26	18.47	23.25	Prkaa2	AMP-activated protein kinase alpha 2 catalytic
108083	6.76	11.05	8.58	13.1	14.21	9.01	10.62	11.33	7.65	8.92	7.96	7.89	8.99	7.73	5.17	4.98	7.62	9.18	14.29	11.79	Pip4k2b	phosphatidylinositol-5-phosphate 4-kinase, type
108086	6.8	8.87	7.32	10.19	10.8	7.41	6.76	14.21	15.26	16.15	15.23	15.66	9.24	12.25	8.96	10.76	8.92	9.73	10.45	9.6	Rnf216	ubiquitin conjugating enzyme 7 interacting,ubiquitin conjugating enzyme 7 interacting,
108089	1.26	4.59	3.51	2.15	1.51	1.57	2.29	3.9	1.86	1.82	2.57	2.18	5.46	5.96	3.3	5.25	4.07	2.49	2.89	4.47	Rnf144a	ring finger protein 144
108096	0	0	0	0.03	0	0	0	0	0	0	0	0.03	0	0.1	0	0	0	0	0	0	Slco1a5	solute carrier organic anion transporter family,,solute carrier organic anion transporter family,,
108097	6.65	9.59	8.5	13.58	12.49	10.57	11.34	10.91	9.43	13.27	17.46	14.09	36.03	29.02	44.72	24.52	38.6	8.56	9.27	14.66	Prkab2	AMP-activated protein kinase beta 2
108098	16	12.04	28.72	17.74	12.15	15.02	13.09	12.43	20	16.86	12.49	18.11	21.95	17.71	23.49	22.95	29.24	16.32	14.26	9	Med21	SRB7 (supressor of RNA polymerase B) homolog
108099	6.19	6.31	6.46	6.09	9.64	6.2	6.14	8.88	9.53	6.22	5.46	6.98	15.65	18.31	10.9	17.79	16.01	8.94	11.4	8.97	Prkag2	AMP-activated protein kinase gamma2 subunit,AMP-activated protein kinase gamma2 subunit,
108100	3.97	2.03	2.67	4.27	4.11	2.09	2.9	6.17	5.31	2.9	2.54	3.42	11.23	10.59	7.4	7.31	8.56	3.94	6.05	3.19	Baiap2	brain-specific angiogenesis inhibitor
108101	1.29	1.93	1.25	1.72	2.38	1.38	1.19	2.9	2.5	1.53	1.24	1.68	17.32	16.36	13.2	10.44	13.72	1.75	2.21	1.82	BC032204	UNC-112 related protein 2,UNC-112 related protein 2,
108105	0.09	0.05	0.17	0.09	0	0.15	0.12	0.08	0	0	0	0.04	0.41	0.32	0.11	1.34	0.44	0	0.08	0.08	B3gnt5	UDP-GlcNAc:betaGal,UDP-GlcNAc:betaGal,
108112	7.55	5.34	3.58	3.82	4.75	2.94	4.94	13.88	9.81	4.75	6.18	5.67	7.2	10.82	9.4	7.29	12	10.17	9.66	8.05	Eif4ebp3	eukaryotic translation initiation factor 4E
108114	0.07	0.73	0.1	0.02	0.04	0	0.02	0.07	0.07	0.23	0.12	0.1	0.22	0.04	0	0.03	0.09	0.09	0	0.11	Slc22a7	solute carrier family 22 member 7
108115	0	0	0.04	0.03	0.04	0.03	0	0.12	0.03	0	0	0.02	0.15	0.08	0	0.22	0.19	0	0	0	Slco4a1	solute carrier organic anion transporter family,,solute carrier organic anion transporter family,,
108116	20.94	20.61	19.8	24.61	26.66	25.52	29.34	24.3	21.14	16.77	15	15.78	21.17	26.16	16.26	14.15	16.8	28.59	34.3	34.53	Slco3a1	solute carrier organic anion transporter family,
108121	35.58	24.26	20.77	28.56	28.18	12.49	21.88	61.95	40.5	46.36	41.83	42.27	41.85	52.43	33.68	41.34	33.53	32.72	33.39	31.78	U2af1	U2 small nuclear ribonucleoprotein auxiliary
108123	4.13	5.93	4.7	8.31	6.87	5.03	4.67	9.49	5.59	6	7.9	6.54	16.23	10.32	6.5	14.83	12.56	10.52	10.03	9.75	Napg	N-ethylmaleimide sensitive fusion protein
108124	49.34	57.88	39.04	50.48	37.65	25.16	24.53	100.93	69.36	76.13	66.39	66.07	52.47	54.9	36.23	47.37	40.75	65.27	72.38	77.23	Napa	N-ethylmaleimide sensitive fusion protein
108138	3.99	2.77	5.21	6.71	6.01	5.64	7.16	3.36	5.77	5.42	3.32	4.38	3.81	4.66	3.41	4.05	4.39	4.96	3.85	3.61	Xrcc4	X-ray repair complementing defective repair in
108147	10.07	12.21	8.24	13.78	10.79	16.05	13.28	11.38	9.21	9.79	7.63	10.8	11.61	11.12	10.15	10.18	10.87	14.28	15.45	14.95	Atic	5-aminoimidazole-4-carboxamide ribonucleotide,5-aminoimidazole-4-carboxamide ribonucleotide,
108148	8.88	12.47	8.72	17.35	20.19	12.51	12.47	15.64	13.35	13.3	12.21	11.91	26.41	23.47	13.32	13.02	18.63	20.19	19.84	20.54	Galnt2	UDP-N-acetyl-alpha-D-galactosamine:polypeptide
108150	2.3	3.07	2.73	3.57	4.25	4.21	4.36	2.19	3.68	2.72	2.12	2.15	4.28	2.15	3.62	2.66	4.09	2.93	3.24	2.23	Galnt7	UDP-N-acetyl-alpha-D-galactosamine: polypeptide
108151	0.17	0.37	0.5	0.75	0.45	0.8	0.78	0.41	1.06	0.4	0.31	0.35	1.18	0.46	1.66	0.73	1.7	0.97	0.77	0.52	Sema3d	semaphorin 3D,semaphorin 3D,semaphorin 3D,
108153	5.33	5.7	4.83	5.09	5.45	4.33	4.4	5.05	3.92	3.19	3.5	2.77	3.3	2.88	2.69	1.85	3.01	7.26	7.94	7.65	Adamts7	a disintegrin-like and metalloprotease,a disintegrin-like and metalloprotease,
108154	0.24	0.49	0.48	0.66	0.52	0.33	0.32	0.25	0.47	0.3	0.26	0.42	1.6	2.24	2.24	1.48	1.55	0.37	0.36	0.3	Adamts6	a disintegrin-like and metalloprotease
108155	18.81	25.15	24.41	26.18	19.09	20.68	19.73	20.03	30.34	27.33	27.66	31.85	22.19	16.37	33.85	19.76	25.95	24.86	19.45	17.71	Ogt	O-linked N-acetylglucosamine transferase,O-linked N-acetylglucosamine transferase,
108156	8.32	10.28	6.26	8.25	10.45	5.13	5.87	12	9.86	8.69	8.22	8.24	10.88	10.47	9.42	10.15	9.36	13	14.15	14.84	Mthfd1	methylenetetrahydrofolate dehydrogenase 1
108159	6.68	7.15	3.91	9.81	12.11	7.95	7.92	8.21	6.99	7.1	6.44	6.84	12.88	12.21	9.1	12.15	10.13	9.71	8.8	8.04	Ubxd6	UBX domain containing 6
108160	16.57	16.65	11.93	18.51	21.42	16.21	17.07	25.72	24.36	20.95	17.46	20.49	21.33	22.64	14.92	23.5	21.02	18.01	18.54	17.21	D0HXS9928E	DNA segment, human DXS9928E
108645	51.63	49.04	41.87	49.07	44.58	31.26	31.84	36.45	35.9	36.76	33.89	37.96	41.56	33.98	42.41	39.6	36.16	51.17	50.54	48.93	Mat2b	methionine adenosyltransferase II, beta,methionine adenosyltransferase II, beta,
108652	1.52	1.32	0.93	1.84	1.76	1.95	1.8	1.56	1.25	2.18	2.1	2.35	3.48	4.13	2.89	3.55	4.31	1.7	1.42	1.53	Slc35b3	solute carrier family 35, member B3,solute carrier family 35, member B3,
108653	0	0	0	0.05	0	0	0	0	0	0	0	0	0.1	0.2	0.18	0.59	0.21	0	0	0	4933426K21Rik	hypothetical protein LOC108653,hypothetical protein LOC108653,
108654	21.93	28.67	30.75	35.2	25.23	23.71	26.27	28.16	38.32	40.58	30.08	45.15	12.95	17.35	13.24	12.95	13.96	26.7	22.77	26.12	4933403F05Rik	hypothetical protein LOC108654
108655	4.12	5.98	4.63	4.63	3.71	5.56	4.96	5.3	5.94	4.27	4.26	5.19	9.16	11.91	7.38	7.5	8.7	6.93	6.28	6.38	Foxp1	forkhead box P1,forkhead box P1,forkhead box P1,forkhead box P1,forkhead box P1,forkhead box P1,forkhead box P1,
108657	25.09	27.42	26.54	24.2	21.25	12.47	12.35	37.95	24.37	25.91	25.49	19.39	29.54	24.15	19.08	19.7	21.73	34.55	39.59	43.94	Rnpepl1	arginyl aminopeptidase (aminopeptidase B)-like
108664	11.07	12.91	12.65	13.48	11.72	8.33	8.98	9.17	11.32	13.11	10.43	16.27	34.32	45.06	46.56	42.91	38.72	12.52	11.74	10.38	Atp6v1h	ATPase, H+ transporting, lysosomal V1 subunit H
108670	0.18	1.86	0.45	0.65	0.98	1.05	1.06	0.77	0.55	0.34	1.01	0.12	3.83	2.89	3.17	2.36	5.64	0.88	0.85	1.18	Epsti1	epithelial stromal interaction 1 isoform a
108671	8.6	8.66	5.32	9.09	7.09	9.75	9.2	9.71	9.99	12.34	7.69	10.51	10.25	9.79	7.6	9.85	12.12	7.77	8.81	6.62	Dnajc9	DnaJ homolog, subfamily C, member 9
108672	0.1	0	0.05	0.62	0.41	1.13	1.64	0.14	0.07	0.27	0.36	0.33	0.6	0.47	0.69	0.06	0.53	0.18	0.26	0.28	Zdhhc15	zinc finger, DHHC domain containing 15
108673	5.03	4.8	4.04	5.04	5.7	3.37	4.5	20.02	10.43	9.18	12	8.78	9.99	10.73	4.16	8.41	6	6.89	7.3	8.01	Ccdc86	coiled-coil domain containing 86
108679	36	31.94	27.57	37.28	34.24	23.74	23.89	44.19	34.93	28.92	35.46	36.21	24.54	27.29	13.99	30.39	25.58	36.96	40.23	35.5	Cops8	COP9 signalosome subunit 8
108682	11.59	12.94	11.2	15.98	14.9	18.87	16.71	11.53	11.96	8.55	7.8	8.98	3.63	2.4	3.11	2.88	4.15	15.53	21.99	19.89	Gpt2	glutamic pyruvate transaminase (alanine,glutamic pyruvate transaminase (alanine,glutamic pyruvate transaminase (alanine,
108686	1.34	2.18	1.83	2.38	1.85	2.39	2.38	1.45	1.62	2.05	1.73	2.71	3.93	6.95	7.99	7.31	5.35	1.02	0.91	1.19	Ccdc88a	coiled coil domain containing 88A
108687	6.1	4.58	4.24	5.83	5.34	4.8	4.58	8.19	3.67	4.72	3.08	5.1	16.02	13.09	11.52	12.1	14.6	7.53	6.64	6.97	Edem2	putative alpha-mannosidase
108689	6.87	7.23	5.23	7.76	7.53	6.5	7.02	8.01	6.95	6.76	5.14	6.97	9.1	8.05	7.17	6.12	7.37	7.92	8.26	9.91	Obfc1	oligonucleotide/oligosaccharide-binding fold,oligonucleotide/oligosaccharide-binding fold,
108699	10.18	11.35	11.36	13.98	12.66	5.71	5.65	12.61	14.8	11.77	14.57	11.08	10.18	14.76	8.58	16.06	9.14	11.58	12.71	15.13	Chn1	chimerin (chimaerin) 1 isoform 1,chimerin (chimaerin) 1 isoform 1,
108705	39.9	44.55	40.05	43.63	79.35	47.82	43.99	71.12	38.22	59.32	43.34	46.05	68.72	79.76	54.86	47.89	64.47	58.38	57.26	58.02	Pttg1ip	pituitary tumor-transforming gene 1
108707	4.39	1.81	2.06	6.83	14.54	3.08	4.8	12.77	7.34	7.71	4.74	5.89	9.16	13.49	5.96	5.24	6.62	8.02	6.48	8.6	1810008A18Rik	hypothetical protein LOC108707,hypothetical protein LOC108707,
108723	0.07	0.09	0.02	0.01	0.15	0.05	0.03	0.1	0.09	0	0.04	0.02	0.17	0.13	0.23	0.01	0.13	0.03	0.02	0.03	Card11	caspase recruitment domain family, member 11,caspase recruitment domain family, member 11,
108735	6.22	9.37	8.3	11	10.61	8.11	7.54	9.27	9.21	6.77	7.76	5.87	10.47	7.04	7.62	6.04	10.18	9.72	6.5	13.83	Sft2d2	SFT2 domain containing 2
108737	13.85	16.62	16.99	18.6	18.66	22.98	22.37	13.4	17.51	19.33	13.42	21.68	19.89	19.94	19	18.95	20.36	17.35	15.36	13.54	Oxsr1	oxidative-stress responsive 1,oxidative-stress responsive 1,
108755	16.34	19.05	29.78	26.93	39.8	57.09	47.96	32.19	12.53	22.85	35.91	26.36	18.39	9.83	12.56	23.64	26.64	19.73	19.03	20.84	Lyrm2	LYR motif containing 2
108760	0.89	0.86	0.83	1.61	1.71	2.02	1.32	1.92	0.94	1.61	1.38	1.19	8.42	12.44	3.4	9.03	7.5	1.47	1.77	1.21	Galntl1	UDP-N-acetyl-alpha-D-galactosamine:polypeptide,UDP-N-acetyl-alpha-D-galactosamine:polypeptide,UDP-N-acetyl-alpha-D-galactosamine:polypeptide,
108767	36.01	27	35.84	31.52	52.99	15.56	25.81	52.44	35.69	35.59	29	31.72	30.85	28.08	32.24	30.52	28.96	35.46	41.91	45.02	Pnrc1	proline-rich nuclear receptor coactivator 1
108800	0.53	1.48	1.11	0.84	0.78	0.39	0.74	1.02	0.49	1.03	0.77	0.58	0.43	0.54	0.54	0.23	0.25	1.02	1.08	1.64	Ston2	stonin 2
108802	0.03	0.18	0	0.1	0.18	0.03	0.09	0	0	0.06	0	0.15	0.85	0.2	0.12	0.32	0.72	0.04	0.09	0	Calr4	calreticulin 4,calreticulin 4,
108803	0	0	0	0	0	0	0	0	0	0	0	0.03	0	0	0	0	0	0	0	0	4933402P03Rik	hypothetical protein LOC108803
108811	0.87	0.92	1.11	1.06	0.48	0.59	0.39	0.44	0.74	0.99	0.83	1.53	2.23	2.92	3.21	3.44	2.64	0.7	0.78	0.58	Ccdc122	coiled-coil domain containing 122
108812	0	0	0	0	0	0.08	0.1	0.13	0	0	0.06	0.09	0.05	0.07	0.09	0.34	0.08	0.06	0	0	Als2cr12	amyotrophic lateral sclerosis 2 (juvenile)
108816	0.1	0.02	0.1	0.17	0.08	0.1	0.04	0	0.15	0.07	0.05	0.07	0.32	0.04	0.09	0.01	0.29	0.06	0.03	0.1	n/a	n/a
108837	9.45	11.16	8.98	9.98	8.67	7.53	7.58	8.5	8.03	7.87	9.4	8.74	14.28	16.11	16.37	15.49	14.92	11.02	10.99	9.66	Ibtk	inhibitor of Bruton's tyrosine kinase,inhibitor of Bruton's tyrosine kinase,
108841	9.49	9.96	8.83	15.27	13.98	7.91	7.89	13.95	12.17	10.5	11.84	11.32	6.43	14.66	8.3	7.63	6.58	14.15	12.17	15.7	Rdh13	retinol dehydrogenase 13 (all-trans and 9-cis),retinol dehydrogenase 13 (all-trans and 9-cis),
108853	4.84	3.45	4.09	5.54	7.83	5.18	6.66	3.88	4.79	4.68	3.01	4.29	2.45	2.95	5.11	2.56	2.27	4.42	4.32	4.41	Mtrf1l	mitochondrial translational release factor
108888	16.92	18.39	14.06	21.08	27.27	22.34	24.61	26.05	17.82	20.36	18.31	17.29	20.59	30.36	12.8	23.35	17.28	21.5	22.47	21.55	Atad3a	AAA-ATPase TOB3
108897	1.42	2.36	2.13	1.31	1.17	0.56	1.56	0.36	0.19	2.34	0.16	1.11	1.12	1.21	3.94	0.31	0.15	1.83	2.19	0.91	2810003C17Rik	ionized calcium binding adapter molecule 2
108899	3.98	2.88	2.79	5.05	6.31	2.97	5.6	10.37	5.42	5.59	4.23	3.59	4.02	3.95	1.71	2.24	2.71	5.78	7.29	7.83	2700081O15Rik	hypothetical protein LOC108899,hypothetical protein LOC108899,
108900	0.93	0.94	0.3	0.24	0.17	0.54	0.22	0.71	1.37	1.31	0.88	0.95	1.56	1.6	0.48	1.12	1.15	0.36	1.34	1.16	2700049P18Rik	hypothetical protein LOC108900
108902	17.55	17.35	14.41	15.54	23.25	16.01	19.02	47.71	22.6	24.41	27.43	19.97	18.93	14.61	9.96	14.74	15.81	23.59	28.22	31.34	B3gnt1	beta-1,3-N-acetylglucosaminyltransferase bGnT-6,beta-1,3-N-acetylglucosaminyltransferase bGnT-6,
108903	3.68	3.32	3.17	4.73	4.69	4.28	4.72	3.85	3.44	2.84	4.17	3.07	10.99	11.76	8.16	10.5	9.51	4.7	5.91	5.59	Tbcd	tubulin-specific chaperone d
108907	0.38	1.74	0.41	0.65	0.56	0.53	0.87	1.48	0.79	0.69	0.47	1.66	1.7	2.44	3.11	1.76	2.11	0.63	0.2	1.4	Nusap1	nucleolar and spindle associated protein 1
108911	5.72	6.98	4.25	8.39	8.4	4.72	4.79	13.34	8.1	7.39	6.82	5.17	11.64	12.32	10.22	10.73	9.37	7.3	9.15	8.59	Rcc2	RCC1-like
108927	15.44	23.39	18.69	17.35	23.24	17.24	21.03	19.61	16.87	13.71	11.22	12.57	53.34	58.54	41.33	31.54	36.73	20.92	25.35	21.06	Lhfp	lipoma HMGIC fusion partner
108943	0.94	1.01	1.7	2.21	1.59	1.59	1	3.19	1.7	2.17	1.25	2.63	3.01	2.93	3.59	3.52	3.04	1.41	1.56	1.38	Rg9mtd2	RNA (guanine-9-) methyltransferase domain,RNA (guanine-9-) methyltransferase domain,
108946	5.77	5.48	4.94	7.6	6.64	7.43	6.49	6.78	8.26	7.46	6.53	8.7	7.66	11.14	6.49	10.2	7.99	6.18	6.35	6.56	Zzz3	zinc finger, ZZ domain containing 3
108954	3.99	6.1	4.87	5.35	5.28	3.94	5.26	9.71	8.02	7.12	6.13	8.69	10.54	12.76	10.62	11.49	9.74	7.06	5.68	5.76	Ppp1r15b	protein phosphatase 1, regulatory subunit 15B
108956	0	0	0.03	0	0	0	0.02	0	0	0	0	0	0	0	0	0	0	0	0	0	2210421G13Rik	hypothetical protein LOC108956
108958	18.2	24.97	22.41	18.05	18.73	11.43	11.95	20.04	12.36	10.86	12.1	9.92	8.18	4.12	5.42	3.42	6.91	21.39	22.37	22.17	5730472N09Rik	hypothetical protein LOC108958,hypothetical protein LOC108958,
108960	2.59	3.26	3.27	3.46	2.16	2.38	2.72	5.11	4.34	3.94	2.94	2.68	4.67	5.79	4.75	3.65	4.13	4.15	4.34	4.04	Irak2	interleukin-1 receptor-associated kinase 2,interleukin-1 receptor-associated kinase 2,interleukin-1 receptor-associated kinase 2,
108961	0.22	1.07	0.71	0.45	0.41	0.3	0.53	0.39	0.3	0.27	0.96	0.23	1.13	1.21	1.38	1.4	1.18	0.78	0.94	0.95	E2f8	E2F transcription factor 8,E2F transcription factor 8,
108978	0.34	0.5	0.53	0.32	0.66	0.18	0.34	0.09	0.2	0.74	0.58	0.45	0.29	1.38	1.7	0.74	0.32	0.88	0.09	0.19	4930555G01Rik	hypothetical protein LOC108978
108989	26.52	27.89	27.26	40.45	33.41	41.01	39.05	25.5	34.19	38.69	29.31	44.48	24.5	36.02	33.14	33.35	29.45	29.13	25.91	24.16	Tpr	nuclear pore complex-associated protein Tpr,nuclear pore complex-associated protein Tpr,nuclear pore complex-associated protein Tpr,
108995	2.31	2	2.18	1.52	1.27	1.68	1.38	1.69	0.65	0.96	0.57	0.55	0.51	0.29	1.68	0.3	0.57	1.73	2.57	2.6	Tbc1d10c	TBC1 domain family, member 10c,TBC1 domain family, member 10c,
109006	33.13	34.94	24.12	32.21	38.67	32.16	31.67	27.53	21.79	20.47	17.3	20.65	32.98	22.2	22.23	24.64	27.11	36.8	40.25	39.34	Ciapin1	cytokine induced apoptosis inhibitor 1
109019	19.95	16.7	23.17	26.97	26.09	45.87	39.1	17.01	24.76	24.96	30.37	27.77	13.96	9.64	14.86	10.79	20.44	17.59	13.24	11.28	Obfc2a	oligonucleotide/oligosaccharide-binding fold,oligonucleotide/oligosaccharide-binding fold,
109032	4.08	6.72	5.94	3.77	4.79	4.94	4.72	7.28	4.66	2.97	3.54	4.87	8.03	6.16	8.63	7.59	8.09	5.49	4.46	5.43	Sp110	Sp110 nuclear body protein,Sp110 nuclear body protein,Sp110 nuclear body protein,
109042	11.95	15.19	7.5	13.11	12.32	4.16	6.47	26.77	10.59	14.69	17.41	10.85	40.42	44.45	22.42	24.09	29.71	22.73	20.57	24.62	Prkcdbp	protein kinase C, delta binding protein
109050	11.41	13.5	8.24	11.75	19.11	10.45	11.65	18.25	14.55	20.47	15.5	13.24	3.5	3.56	2.8	1.15	2.99	10.99	16.33	12.49	6530418L21Rik	hypothetical protein LOC109050,hypothetical protein LOC109050,
109052	0.31	0.43	0.62	0.22	0.04	0.17	0.05	0.63	0.07	0.09	0.03	0.06	1.19	0.52	0.68	1.01	1.1	0.31	0.56	0.4	Krt75	keratin 75
109054	13.15	11.41	10.52	13.76	8.01	6.57	4.92	15.94	9.73	14.31	8	20.31	7.5	17.95	1.52	11.96	9.83	16.67	15.03	9.75	Pfdn4	prefoldin 4
109065	1.13	1.12	1.49	1.63	1.7	0.95	1.1	3.31	1.21	1.78	1.96	1.22	2.37	3.44	0.86	2.25	2.5	1.4	2.08	2.83	1110034A24Rik	hypothetical protein LOC109065
109075	15.42	10.39	12.12	15.73	14.03	7.48	7.21	26.11	12.23	14.71	11.89	11.23	13.02	13.83	6.06	13.2	12.3	15.33	18.03	18.99	Exosc4	exosome component 4
109077	4.79	4.17	3.87	3.78	3.82	2.85	2.92	6.18	3.35	4.63	3.62	3.68	5.15	4.88	3.76	4.7	4.8	4.63	5.69	5.7	Ints5	integrator complex subunit 5
109079	5.57	6.8	5.71	8.29	7.1	6.32	7.23	10.17	9.35	8.24	7.38	10.01	11.37	12.56	9.61	11.1	10.42	6.99	6.76	6.31	Sephs1	selenophosphate synthetase 1,selenophosphate synthetase 1,
109082	1.43	0.89	1.35	1.83	1.45	2.24	1.73	1.85	0.94	1.16	1.62	0.88	3.43	2.84	2.08	2.1	3.32	1.57	1.98	1.63	Fbxw17	F-box and WD-40 domain protein 17
109093	8.18	7.08	5.61	6.04	7.26	6.73	9.2	5.67	6.14	5.91	4	8.04	7.82	8.11	7.74	13.24	8.57	7.72	7.07	5.9	Rars2	arginyl-tRNA synthetase-like
109108	37.9	36.05	41.63	51.67	47.77	38.52	34.18	29.66	34.81	36.03	28.39	41.86	20.35	22.65	27.92	29.21	24.68	46.64	41.08	40.91	Slc30a9	solute carrier family 30 (zinc transporter),,solute carrier family 30 (zinc transporter),,solute carrier family 30 (zinc transporter),,
109113	4.58	5.57	5.06	6.84	6.92	8.13	7.45	5.32	7.16	5.25	5.95	7.11	5.8	5.86	7.83	7.02	6.87	5.67	5.06	5.06	Uhrf2	ubiquitin-like, containing PHD and RING finger,ubiquitin-like, containing PHD and RING finger,
109115	8.11	5.51	3.8	8.22	5.52	6.32	5.96	5.02	6.19	5	3.09	5.09	6.88	4.64	5.54	4.13	6.39	7.93	8.67	6.81	Supt3h	suppressor of Ty 3 homolog
109129	50.84	44.71	43.26	55.99	48.36	40.14	42.73	49.12	44.05	51.99	42.71	57.34	37.21	49.45	32.38	52.21	42.32	49.64	55.42	46.96	2010311D03Rik	hypothetical protein LOC109129
109135	5.27	6.86	5.53	6.33	7.05	7.33	7.36	6.49	6.51	5.84	5.54	5.94	5.27	5.82	6.13	5.46	5.01	6.57	7.34	6.3	Plekha5	phosphoinositol 3-phosphate-binding protein-2,phosphoinositol 3-phosphate-binding protein-2,phosphoinositol 3-phosphate-binding protein-2,phosphoinositol 3-phosphate-binding protein-2,phosphoinositol 3-phosphate-binding protein-2,
109136	30.36	31.47	25.89	29.85	26.74	19.82	22.13	31.07	25.79	26.14	22.35	25.65	10.94	8.15	4.77	8.83	8.19	31.85	33.15	26.24	Mmaa	methylmalonic aciduria type A
109145	6.8	10.91	7.46	10.95	10.37	14.07	14.53	8.48	7.85	7.45	5.63	8.84	11.76	8.74	14.3	8.7	9.78	10.66	14.63	10.75	Gins4	SLD5
109151	1.99	2.64	2.19	3.35	3.1	3.35	3.39	2.98	3.86	3.29	2.75	3.83	4.68	4.46	4.46	3.72	4.25	2.57	2	2.75	Chd9	chromodomain helicase DNA binding protein 9,chromodomain helicase DNA binding protein 9,
109154	14.29	20.85	15.44	21.62	32.1	25.52	33.19	44.88	34.81	37.63	34.8	28.32	24.9	24.34	22.55	17.05	21.95	23.93	24.19	26.52	2410014A08Rik	hypothetical protein LOC109154
109161	6.24	6.55	12.55	12.11	16.3	15.32	14.29	8.13	12.96	11.91	11.61	15.07	9.46	13.51	18.3	13.89	14.7	8.95	9.37	7.1	Ube2q2	ubiquitin-conjugating enzyme E2Q 2
109168	2.23	3.81	3.09	5.03	4.06	3.29	3.43	4.19	5.58	3.64	3.11	5.37	12.63	14.24	15.28	13.47	14.45	4.05	3.48	3.22	5730596K20Rik	hypothetical protein LOC109168
109205	4.84	3.83	3.27	4.9	5.51	2.52	3.15	5.08	4.02	4.83	3.66	3.51	3.22	2.94	1.59	2.03	2.53	5.85	7.81	6.78	Sobp	sine oculis-binding protein homolog,sine oculis-binding protein homolog,
109212	0.52	3.45	0.11	0.84	0.74	0.55	0.9	1.35	0.34	0.41	0.49	0.56	2.74	2.68	0.79	1.18	2.77	0.14	0.67	1.7	6720460F02Rik	hypothetical protein LOC109212
109218	0	0.1	0	0.04	0.27	0.43	0	0	0	0	0	0	0	0.09	0	0.14	0.1	0.13	0	0.16	Tmem139	hypothetical protein LOC109218
109225	2.56	1.23	2.75	1.05	1.86	1.64	1.2	0.56	1.7	0.24	2.87	1.06	11.64	3.37	18.2	4.99	14.35	1.83	1.15	1.62	Ms4a7	membrane-spanning 4-domains, subfamily A, member
109229	12.03	7.56	7.94	6.72	5.9	6.59	6.15	5.53	3.92	6.16	4.79	6.12	5.31	6.07	7.06	6.9	6.74	6.83	8.21	7.68	Ppp4r1l	protein phosphatase 4, regulatory subunit 1-like
109232	27.25	22.29	29.64	32.37	23.53	23.36	23.68	21.84	28.21	28.46	21.67	32.4	23.13	38.94	31.93	35.62	31.77	28.27	24.9	23.03	Sccpdh	saccharopine dehydrogenase (putative)
109241	1.81	3.55	2.38	2.08	2.39	2.99	2.48	1.82	2.13	1.67	1.9	2.1	3.02	3.21	3.17	3.73	2.98	1.92	2.33	1.92	Mbd5	methyl-CpG binding domain protein 5,methyl-CpG binding domain protein 5,methyl-CpG binding domain protein 5,
109242	0.02	0.37	0.18	0.18	0.12	0.19	0.25	0.22	0.15	0.32	0.06	0.3	0.33	0.12	0.32	0.45	0.32	0.27	0.09	0.37	Kif24	kinesin family member 24,kinesin family member 24,
109245	93.23	81.22	100.87	145.35	141.59	305.52	279.75	48.1	97.03	113.14	72.99	113.01	21.47	40.02	36.67	27.55	30.37	71.33	61.18	64.62	Lrrc39	leucine rich repeat containing 39 isoform 1
109246	13.23	25.87	14.26	24.26	25.84	22.39	18.51	26.98	21.47	14.86	13.31	15.51	41.93	47.24	31.23	27.85	37.39	28.58	33.24	31.46	Tspan9	tetraspan NET-5,tetraspan NET-5,tetraspan NET-5,
109254	0	0	0.17	0	0	0	0	0	0	0	0	0	0.1	0	0	0.21	0	0	0	0	9530008L14Rik	hypothetical protein LOC109254,hypothetical protein LOC109254,
109263	1.73	2.27	2.22	3.67	2.23	3.21	2.9	2.62	4.72	4.43	4.98	5.82	11.29	16.44	13.11	20.58	14.32	2.47	2.07	1.48	Rlf	rearranged L-myc fusion sequence,rearranged L-myc fusion sequence,rearranged L-myc fusion sequence,
109264	55.5	43.2	42.48	42.57	35.75	33.52	32.35	53.89	39.19	38.99	41.04	37.06	18.93	16.41	10.44	16.06	15.42	56.17	53.23	58.33	Me3	malic enzyme 3, NADP(+)-dependent,,malic enzyme 3, NADP(+)-dependent,,malic enzyme 3, NADP(+)-dependent,,
109270	2.96	1.91	1.99	2.49	1.93	3.1	3.24	3	2.08	2.29	0.96	2.08	2.66	4.11	1.83	2.14	2.26	3.02	4.43	3.46	Arhgap8	Rho GTPase activating protein 8,Rho GTPase activating protein 8,Rho GTPase activating protein 8,
109272	0.01	0.05	0.12	0.3	0.33	0.14	0.23	0.06	0.37	0.17	0.05	0.29	0.03	0.25	0	0	0.02	0.39	0.31	0.45	8030451F13Rik	myosin binding protein C, slow type,myosin binding protein C, slow type,
109275	2.34	1.31	1.98	2.04	1.16	1.54	1.71	3.71	3	1.88	1.39	2.07	2.43	3.49	1.05	3.5	2.08	2.51	2.29	2.59	Actr5	ARP5 actin-related protein 5 homolog,ARP5 actin-related protein 5 homolog,
109280	0.38	0.34	0.18	0.24	0.3	0.27	0.13	0.43	0.18	0.57	0	0.99	0.2	0.39	0.75	0.08	0.07	0.15	0.74	0.8	9330176C04Rik	hypothetical protein LOC109280
109284	32.28	28.03	33.96	29.3	29.97	19.69	24.73	49.22	33.85	32.84	33.45	22.86	33.14	33.23	18.13	19.84	22.59	42.34	46.32	51.47	C030046I01Rik	hypothetical protein LOC109284
109294	3.7	7.28	11.32	3.59	3.29	5.44	3.04	6.31	4.21	6.2	6.58	3.62	8.97	4.44	10.27	2.07	8.99	9.4	4.46	4.02	C030045D06Rik	hypothetical protein LOC109294
109305	7.93	7.51	7.87	6.68	10.03	2.46	3.2	18.77	7.65	8.08	8.22	7.75	15	11.07	5.93	7.51	10.18	14.38	19.47	18.11	Orai1	transmembrane protein 142A,transmembrane protein 142A,
109323	3.37	3.71	2.54	3.08	4.26	1.81	2.36	4.29	4.35	3.29	2.73	2.54	6.15	5.83	3.95	4.47	5.03	2.58	3	3.69	C1qtnf7	C1q and tumor necrosis factor related protein 7,C1q and tumor necrosis factor related protein 7,
109331	13.1	15.02	11.55	16.25	16.48	15.45	17.55	13.51	15.81	17.71	10.74	18.2	12.06	16	13.95	14.09	12.16	15.63	15.72	15.42	Rnf20	ring finger protein 20,ring finger protein 20,
109332	0	0	0.03	0.01	0.02	0	0.02	0	0	0.03	0	0.03	0.03	0.11	0	0	0.03	0.03	0.11	0	Cdcp1	CUB domain-containing protein 1,CUB domain-containing protein 1,
109333	6.02	9.45	8.56	10.34	8.98	11.33	10.15	8.44	12.2	11.69	11.79	13.79	10.27	14.25	16.35	14.68	12.32	9.82	7.45	7.8	Pkn2	protein kinase N2,protein kinase N2,
109342	0	0	0.05	0.06	0.18	0.04	0.09	0	0	0	0	0.05	0.11	0	0	0	0.12	0.06	0.13	0.07	Slc5a10	solute carrier family 5 (sodium/glucose,solute carrier family 5 (sodium/glucose,
109346	4.88	1.84	3.68	1.74	2.01	1.95	1.82	4.93	3.21	3.79	3.58	2.39	7.31	3.86	3.22	3.76	4.31	5.2	5.36	5.46	Ankrd39	ankyrin repeat domain 39
109349	0.73	0.13	0.14	0.68	0.24	0.32	0.31	0.71	0	1.2	0.45	0.53	0	0.12	0.2	0	0.04	0.87	0.48	1.04	C630035N08Rik	hypothetical protein LOC109349
109359	6.67	9.86	7.46	8.92	10.51	10.18	9.47	10.42	10.52	13.52	9.39	14.14	14.29	20.1	12.61	15.01	16.01	7.58	7.86	7.14	C430003P19Rik	hypothetical protein LOC109359,hypothetical protein LOC109359,
109552	19.2	24.5	18.61	21.08	30.7	33.61	29.85	22.74	20.17	18.53	13.43	18.96	49.21	46.21	37.7	43.19	46.58	24.46	24.67	26.81	Sri	sorcin isoform 1
109575	0	0	0	0	0	0	0	0	0	0	0	0	0.52	0.15	0	0	0.14	0	0	0	Tbx10	T-box 10 isoform 1
109593	0	0	0	0.07	0	0	0	0.27	0	0	0	0	0	0	0	0	0	0.11	0	0	Lmo3	LIM domain only 3,LIM domain only 3,
109594	2.06	2.05	1.9	1.74	2.12	2.68	2.06	3.89	2.21	3.05	1.59	3.25	3.05	4.38	2.77	3.06	3.01	2.32	3.42	3.56	Lmo1	LIM domain only 1
109624	20.94	28.63	18.14	24.16	27.28	16.98	28.9	24.52	21.88	26.04	18.2	23.29	47.37	66.27	37.68	48.79	43.62	24.25	21.56	20.82	Cald1	caldesmon 1
109637	0.84	0.55	0.12	0.56	0.2	0.26	0.64	2.51	1.16	1.2	0.95	0.6	0.72	0	0.39	0.15	0.42	0.28	0.71	0.34	Upk1a	uroplakin 1A,uroplakin 1A,
109648	0	0	0	0	0	0.28	0	0	0	0	0.2	0	1.39	0	0	0.78	1.6	0.76	0.42	0.45	Npy	neuropeptide Y
109652	10.99	10.51	10.41	9.78	9.43	5.22	5.89	14.87	12.75	11.38	9.79	9.73	4.28	4.25	2.72	4.09	4.3	15.05	15.66	14.35	Acy1	aminoacylase 1
109658	8.15	14.44	9.15	16.39	16.43	10.53	12.58	19.45	17.38	19.58	12.98	15.91	14.14	20.05	9.17	14.36	12.39	14.7	15.71	16.19	Txlna	taxilin alpha,taxilin alpha,
109660	0.06	0.21	0.28	0.18	0.05	0.1	0	0.56	0.17	0.21	0.85	0.31	0.44	0.36	0	0.84	0.1	0.14	0.15	0.25	Ctrl	chymotrypsin-like
109672	32.58	40.64	45.92	42.4	37.22	54.56	46.79	38.92	22.9	31.75	32.35	35.32	53.8	41.28	56.47	46.75	54.69	41.45	34.92	27.01	Cyb5	cytochrome b-5
109674	1.89	2.92	1.47	2.32	2.73	2.69	2.17	4.59	2.56	2.03	2.19	1.96	5.08	6.3	3.24	3.71	4.56	2.69	2.86	3.24	Ampd2	adenosine monophosphate deaminase 2 (isoform L),adenosine monophosphate deaminase 2 (isoform L),adenosine monophosphate deaminase 2 (isoform L),
109676	17.43	30.37	16.51	23.83	21.3	19.13	21.11	21.44	25.3	19.49	16.11	17.36	12.93	14.66	11.68	11.88	12.09	29.44	28.5	24.6	Ank2	ankyrin 2, brain isoform 3
109685	0.25	0.05	0.14	0	0.23	0.05	0.14	0.39	0.29	0.51	0.14	0.28	0.09	0.4	0	0.31	0.21	0.4	0.29	0.16	Hyal3	hyaluronoglucosaminidase 3
109689	3.38	4.65	2.04	3.84	2.66	2.9	3.25	3.22	2.73	2.39	2.29	2.29	7.29	8.62	5.68	3.62	5.7	3.57	3.84	3.96	Arrb1	arrestin, beta 1 isoform A
109697	0.1	0.19	0	0.08	0	0.09	0.03	0	0	0	0	0	0	0.22	0	0	0	0.17	0	0	Cpa1	carboxypeptidase A1
109700	3.04	7.38	4.57	5.92	7.92	10.73	10.22	6.13	7.37	6.9	5.48	7.63	6.04	4.2	7.28	4.34	6.14	5.35	3.05	5.28	Itga1	integrin alpha 1,integrin alpha 1,
109711	10.01	14.41	10.18	13.89	12.92	11.96	9.98	19.91	15.66	14.19	10.46	13.18	91.77	82.43	72.01	57.19	79.15	16.58	18.15	16.37	Actn1	actinin, alpha 1,actinin, alpha 1,
109731	20.93	20.31	21.81	29.2	23.74	27.08	23.05	12.43	18.55	18.34	15.58	21.88	8.21	6.61	8.24	6.97	5.62	20.36	21.87	18.13	Maob	amine oxidase (flavin-containing)
109754	31.53	38.69	25.1	34.96	36.65	30.94	32.97	50.69	30.66	30.88	36.86	26.41	136.31	125.98	93.15	117.78	121.82	49.36	49.71	59.08	Cyb5r3	diaphorase 1
109778	14.32	9.09	7.38	11.23	11.76	7.69	7.2	10.22	5.25	4.78	7.98	6.66	19.97	16.29	12.35	11.62	19.48	10.79	10.76	9.87	Blvra	biliverdin reductase A,biliverdin reductase A,
109785	2.76	2.81	1.57	2.42	2.84	3.31	2.63	3.39	3.16	2.84	1.31	2.71	9.82	9.14	8.29	9.46	11.11	2.25	3.72	2.97	Pgm3	phosphoglucomutase 3,phosphoglucomutase 3,phosphoglucomutase 3,
109801	50.86	53.84	46.52	51.25	47.09	32.83	28.38	69.16	61.57	55.33	65.99	67.19	37.35	31.29	28.98	29.6	42.39	54.18	61.82	55.85	Glo1	glyoxalase 1
109815	20.48	15.08	17.04	22.76	27.13	30.59	31.98	44.19	43.7	43.66	41.99	45.38	32.06	52.63	36.39	39.75	37.72	20.51	22.15	20.21	H47	selenoprotein S
109820	0	0	0	0	0	0	0	0	0	0	0	0.05	0	0	0	0	0	0	0	0	Pgc	progastricsin (pepsinogen C)
109821	0	0	0	0	0	0	0	0	0	0	0	0	0	0	0	0	0.01	0	0	0	F11	coagulation factor XI
109857	2.41	1.6	0.76	1.48	1.59	1.03	1.37	1.7	2.4	2.22	0.9	1.83	4.66	4.44	3.4	2.55	3.11	1.55	2.57	2.84	Cbr3	carbonyl reductase 3
109880	1.41	1.97	2.15	2.74	2.79	3.23	3.32	3.25	3.79	4.92	3.3	4.82	4.18	3.99	3.6	5.25	4.69	2.61	2.97	2.66	Braf	Braf transforming,Braf transforming,Braf transforming,
109889	0.19	0.09	0.14	0.2	0.32	0.18	0.11	0.37	0.21	0.23	0.17	0.1	0.19	0.39	0.32	0.21	0.19	0.13	0.29	0.27	Mzf1	myeloid zinc finger 1,myeloid zinc finger 1,myeloid zinc finger 1,
109900	2.38	2.58	1.23	2.41	2.1	2.07	1.38	2.78	1.76	3.37	1.85	2.31	5.97	5.86	3.3	6.94	5	3.24	2.57	2.83	Asl	argininosuccinate lyase
109901	1.3	0.22	1.44	0.83	0.24	0.36	0.21	0.25	0.09	0.54	0.36	0.43	3.03	1.57	1.86	0.94	3.24	0.63	0.7	0.67	Ela1	elastase 1, pancreatic
109904	0	0	0	0	0	0	0	0	0	0	0	0.02	0	0.03	0	0	0	0	0	0	Mcf2	mcf.2 transforming,mcf.2 transforming,
109905	39.95	39.66	43.2	59.41	59.94	53.54	57.88	31.38	42.28	41.08	41.37	56.05	55.02	75.56	77.27	108.76	71.97	33.47	31.64	25.57	Rap1a	RAS-related protein-1a
109910	28.93	30.59	33.58	33.41	39.92	29.36	28.01	35.25	36.07	40.88	30.91	43.33	43.27	67.2	55.79	62.15	48.03	32.7	34.63	35.14	Zfp91	zinc finger protein 91
109929	3.07	1.85	3.33	2.02	1.65	2.19	1.97	2.01	3.04	2.2	3.16	1.91	6.04	4.58	6.73	4.42	6.11	2.38	4.67	3.14	Zbtb25	zinc finger and BTB domain containing 25
109934	6.98	11.47	7.58	9.57	9.81	7.45	8.79	10.2	8.44	7.56	5.12	8.03	14.25	14	14.79	10.45	12.21	13.2	12.19	9.21	Abr	active BCR-related isoform 1
109978	0.6	1.39	1.08	1.02	0.39	0.73	0.48	0.61	0.77	1.23	0.54	0.76	1.3	0	3.44	0.29	1.7	0.94	0.89	0.45	Art4	ADP-ribosyltransferase 4
109979	113.32	117.39	106.39	153.89	160.32	104.43	175.11	101.24	96.09	90.06	74.73	95.79	211.88	226.04	152.53	224.9	190.58	125.71	120.59	124.42	Art3	ADP-ribosyltransferase 3,ADP-ribosyltransferase 3,ADP-ribosyltransferase 3,ADP-ribosyltransferase 3,ADP-ribosyltransferase 3,
110006	5.5	6.63	5.85	7.77	9.89	6.08	7.32	8.65	6.31	6.29	5.87	5.57	34.52	22.42	29.86	17.89	30.51	8.79	7.64	8.93	Gusb	glucuronidase, beta
110012	6.4	4.77	4	7.25	9.67	3.19	4.34	15.27	8.47	8.04	7.46	4.22	10.04	8.92	5.74	5.19	6.32	8.71	12.17	13.42	Gtrgeo22	hypothetical protein LOC110012
110033	0.98	1.29	0.25	0.78	0.88	0.61	0.53	1.3	0.44	0.62	1.2	0.66	2.62	2.2	1.7	3.52	2.6	0.43	0.36	1.24	Kif22	kinesin family member 22
110052	14.7	17.63	18.57	30.26	32	53.24	49.92	16.57	23.2	33.11	30.42	36.42	26.91	46.34	47.63	52.86	35.91	14.7	12	11.03	Dek	DEK oncogene (DNA binding),DEK oncogene (DNA binding),
110058	0.89	0.3	0.34	0.23	0.22	0.3	0.33	0.49	0.2	0.44	0.29	0.23	0.5	0.38	0	0.23	0.41	0.83	0.56	0.38	Syt17	synaptotagmin XVII,synaptotagmin XVII,synaptotagmin XVII,synaptotagmin XVII,
110074	29.77	16.23	15.74	32.12	35.55	16.61	18.59	25.44	18.6	19.63	19.51	23.21	6.93	13.87	8.04	14.07	10.75	27.35	24.99	24.01	Dut	deoxyuridine triphosphatase,deoxyuridine triphosphatase,
110075	0.05	0	0	0	0	0	0.04	0	0	0	0	0.06	0	0	0	0	0.18	0	0	0	Bmp3	bone morphogenetic protein 3,bone morphogenetic protein 3,
110078	126.44	142.59	112.58	162.1	155.56	116.75	125.45	120.55	103.66	111.72	97.33	100.39	117.58	114.44	94.97	95.82	102.95	150.58	187	183.6	Pygb	brain glycogen phosphorylase
110082	0	0	0	0	0	0	0	0	0	0	0	0	0	0.01	0	0	0	0	0	0	Dnahc5	dynein, axonemal, heavy chain 5
110094	4.24	5.74	6.36	5.82	6.6	4.34	4.54	6.08	4.69	5.04	4.28	4.73	10.13	8.07	11.08	6.85	9.23	6.76	6.61	6.51	Phka2	phosphorylase kinase alpha 2,phosphorylase kinase alpha 2,phosphorylase kinase alpha 2,
110095	4.61	4.62	4.77	4.91	5.05	4.11	3.76	6.11	4.38	4.62	3.56	4.32	9.08	6.79	8.29	8.6	8.66	6.58	7.64	6.46	Pygl	liver glycogen phosphorylase
110109	6.95	6.64	5.5	5.92	8.5	6.57	7.1	16.82	12.89	12.53	11.26	10.15	9.09	12.2	7.56	9.32	7.97	7.48	8	8.45	Nol1	nucleolar protein 1
110115	0	0	0	0	0	0	0	0	0	0	0	0	0	0	0	0.03	0	0	0	0	Cyp11b1	cytochrome P450, family 11, subfamily b,
110119	55.06	61.86	53.83	52.5	59.54	87.43	106.79	43.14	37.91	33.42	35.91	32.91	32.99	22.83	35.32	23.23	30.34	56.17	65.14	62.43	Mpi	mannose phosphate isomerase
110135	0	0	0	0	0	0	0	0	0	0	0	0	0.15	0.26	0	0	0.13	0	0	0	Fgb	fibrinogen, B beta polypeptide
110147	13.67	11.44	11.82	15.98	16.56	10.56	12.37	32.49	21.75	22.3	22.58	19.31	23.9	22.39	16.96	17.09	18.12	18.52	19.65	20.55	Ehmt2	euchromatic histone lysine N-methyltransferase 2,euchromatic histone lysine N-methyltransferase 2,
110157	44.19	49.63	38.73	39.94	30.95	24.53	25.44	41.3	38.4	33.12	30.58	32.72	26.66	32.3	23.5	26.47	25.6	49.21	49.76	52.15	Raf1	protein kinase raf 1,protein kinase raf 1,protein kinase raf 1,
110168	0.17	0.12	0.13	0.59	0.11	0.14	0.24	0.05	0.29	0.24	0.2	0.24	0.69	0.1	0.03	0.04	0.39	0.16	0.26	0.33	Gpr18	G protein-coupled receptor 18
110172	17.45	15.84	14.99	12.95	20.1	10.18	12.22	29.14	17.79	20.57	19.22	20.49	39.95	35.91	19.54	28.51	34.46	16.86	18.36	18.4	Slc35b1	solute carrier family 35, member B1
110173	3.29	3.65	3.54	2.88	3.3	2.79	3.4	4.88	3.28	2.4	2.28	2.81	4.78	6.18	5.48	5.86	5.15	4.56	4.71	4.95	Manba	mannosidase, beta A, lysosomal,mannosidase, beta A, lysosomal,mannosidase, beta A, lysosomal,
110196	13.71	13.1	7.82	12.04	7.81	7.04	7.72	17.86	9.79	10.53	9.5	10.4	18.64	14.92	12.79	16	19.15	10.82	12.6	11.75	Fdps	farnesyl diphosphate synthetase
110197	0.02	0.5	0.08	0.2	0.22	0.09	0.25	0.14	0.06	0.11	0.33	0.1	0.09	0.07	0.02	0	0.38	0.3	0.19	0.09	Dgkg	diacylglycerol kinase, gamma,diacylglycerol kinase, gamma,diacylglycerol kinase, gamma,
110198	24.62	14.91	21.42	20.33	21.38	15.57	15.23	34.05	16.16	17.17	17.61	12.13	10.81	7.99	5.97	6.75	7.45	27.54	32.78	38.05	Akr7a5	aldo-keto reductase family 7, member A5
110208	18.35	19.22	12.77	16.08	18.71	17.82	17	21.49	15.77	16.44	13.94	14.62	36.46	42.61	36.92	30.71	32.59	21.45	22.94	24.44	Pgd	phosphogluconate dehydrogenase
110213	72.21	75.27	64.79	69.21	77.38	54.64	54.8	126.85	78.75	69.14	98.77	69.51	115.82	85.43	85.52	88.22	102.23	106.59	102.31	108.81	Tegt	testis enhanced gene transcript
110257	1766.77	1772.17	1971.72	813.47	793.69	1286.58	1217.67	3020.41	1363.74	1225.08	1164.03	926.95	427.12	289.22	65.35	221.18	351.62	1960.45	1111.89	1477.41	Hba-a2	hemoglobin alpha, adult chain 2,hemoglobin alpha, adult chain 2,
110265	32.94	22.13	24.57	22.1	23.83	12.44	13.85	37.54	27.15	24.46	21.44	24.46	15.77	14.97	8.99	14.07	15.3	41.2	40.73	39.89	Msra	methionine sulfoxide reductase A,methionine sulfoxide reductase A,methionine sulfoxide reductase A,methionine sulfoxide reductase A,
110279	1.99	2.46	1.94	2.04	2.68	1.24	1.19	3.63	3.2	3.08	3.84	2.41	6.54	6.85	3.67	5.88	5.36	3.31	3.54	3.05	Bcr	breakpoint cluster region homolog
110304	0	0	0	0	0	0	0	0	0	0	0	0	0	0	0	0	0	0	0.08	0	Glra3	glycine receptor, alpha 3 subunit
110308	0	0	0	0	0.05	0	0	0	0	0	0	0	0.05	0.04	0	0.03	0.01	0.03	0	0	Krt5	keratin 5
110310	0.03	0	0.03	0	0	0	0.02	0.13	0	0.16	0.22	0.04	0.46	0.19	0.67	0.07	0.21	0.21	0.08	0	Krt7	keratin 7
110312	0	0.15	0	0	0.2	0	0	0	0	0	0	0	0.18	0.25	0	0.39	0.05	0	0	0	Pmch	pro-melanin-concentrating hormone
110323	1018.21	886.9	888.84	859.14	753.6	593.95	890.55	855.12	568.29	525.46	675.29	505.33	557.72	353.05	406.8	465.19	492.74	895.13	799.5	887.05	Cox6b1	cytochrome c oxidase, subunit VIb polypeptide 1
110326	0.06	0.05	0.01	0.07	0.08	0.15	0.08	0.06	0.08	0.17	0.13	0.05	0.06	0.09	0.08	0.08	0.14	0.18	0.11	0.06	Tas1r1	sweet taste receptor T1r
110332	0.16	0.03	0.09	0.21	0.04	0.13	0.08	0.2	0.43	0.16	0.07	0.19	0.08	0.14	0.6	0.83	0.17	0.11	0	0.05	4921523A10Rik	hypothetical protein LOC110332
110350	0.38	0.46	0.47	0.85	0.54	0.76	0.72	0.54	0.77	1.03	1.08	1.06	1.17	0.98	0.99	1.11	1.12	0.48	0.34	0.49	Dync2h1	dynein cytoplasmic 2 heavy chain 1
110351	2.68	5.19	2.8	4.54	4.93	2.53	2.77	4.45	3.45	4.18	3.09	3.11	2.1	1.34	1.27	0.99	1.44	7.19	6.45	5.09	Rap1gap	Rap1 GTPase-activating protein,Rap1 GTPase-activating protein,
110355	22.11	28.51	21.53	26.03	20.54	18.94	21.17	36.34	26.94	23.81	21.08	23.69	34.61	33.03	26.55	30.82	25.01	30.41	34.89	33.87	Adrbk1	adrenergic receptor kinase, beta 1,adrenergic receptor kinase, beta 1,
110379	37.76	47.62	27.9	36.99	27.44	18.53	19.84	49.34	36.4	38.2	30.98	34.15	71.09	56.42	44.84	73.08	55.19	30.76	44.45	40.82	Sec13	SEC13-like 1
110380	0.42	1.18	0.61	1.09	0.8	0.79	0.68	0.81	0.81	0.73	0.5	0.7	1.8	2.47	1.52	1.74	1.64	1.11	1.03	1.03	Shroom2	shroom family member 2,shroom family member 2,shroom family member 2,
110385	1.67	3.16	3.1	3.84	2.48	1.68	2.45	4.07	3.98	2.89	3.58	3.23	1.34	1.14	1.12	0.91	1.02	4.03	5.24	4.05	Pde4c	phosphodiesterase 4C, cAMP specific,phosphodiesterase 4C, cAMP specific,
110391	29.12	24.7	29.64	32.83	32.38	21.53	23.05	26.46	17.27	28.38	20.24	21.84	18.94	20.79	15.63	13.03	17.05	30.18	32.39	35.19	Qdpr	quinoid dihydropteridine reductase
110417	1.34	0.55	0.65	1.45	0.79	0.78	1.33	1.34	1.55	0.27	1.82	1.57	1.05	0.35	0.14	1.99	1.05	0.79	0.88	1.16	Pigh	phosphatidylinositol glycan anchor biosynthesis,,phosphatidylinositol glycan anchor biosynthesis,,
110446	365.06	328.34	311.22	349.71	272.33	420.65	429.08	284.6	348.39	340.73	298.05	366.81	87.5	111.78	86.78	101.62	94.72	367.77	360.06	357.71	Acat1	acetyl-Coenzyme A acetyltransferase 1 precursor
110454	90.07	77.06	66.48	81.48	64.96	96	109.05	107.52	104.33	83.69	110.28	80.46	143.16	101.66	83.16	154.09	142.92	93.52	81.65	71.28	Ly6a	lymphocyte antigen 6 complex, locus A,lymphocyte antigen 6 complex, locus A,
110460	4.03	5.37	3.2	6.53	6.51	4.57	3.98	10.21	6.28	5.66	3.97	5.48	4.61	5.49	5	3.96	4.72	6.5	9.19	4.92	Acat2	acetyl-Coenzyme A acetyltransferase 2,acetyl-Coenzyme A acetyltransferase 2,
110521	3.13	4.61	3.37	4.7	5.42	4.74	4.72	5.93	5.35	4.53	4.75	4.6	8.16	9.47	7.4	7.2	7.08	5.29	5.34	5.32	Hivep1	human immunodeficiency virus type I enhancer
110524	1.36	2.01	1.18	2.57	3.49	3.41	3.32	5.54	3.75	5.18	2.85	4.12	2.49	1.77	2.24	1.8	2.18	3.22	3.98	2.88	Dgkq	diacylglycerol kinase, theta
110542	0.19	0.09	0.14	0.5	0.51	0.31	0.34	2.47	1.36	1.53	1.11	1.68	0.34	0.45	0	0.7	0.27	0.26	0.16	0.27	Amhr2	anti-Mullerian hormone type 2 receptor
110557	33.68	50.65	22.37	15.98	68.93	57.24	20.49	49.78	26.41	35.45	24.93	29.34	52.9	32.9	57.92	27.84	45.67	23.05	28.27	18.88	H2-Q6	histocompatibility 2, Q region locus 6,histocompatibility 2, Q region locus 6,histocompatibility 2, Q region locus 6,
110593	8.05	9	8.22	9.07	10.09	7.18	7.9	12.75	13.2	11.86	10.71	11.87	10.09	13	9.11	11.46	9.9	9.42	9.66	9.91	Prdm2	PR domain containing 2, with ZNF domain
110595	4.21	4.43	5.07	19.82	7.61	8.92	6.54	5.13	8.97	8.91	10.01	10.85	9.49	11.64	7.61	16.32	9.6	9.18	6.92	8.64	Timp4	tissue inhibitor of metalloproteinase 4,tissue inhibitor of metalloproteinase 4,
110596	1.35	1.64	1.09	1.62	1.86	1.16	1.39	1.81	1.58	1.89	1.2	1.58	1.88	2.4	1.47	2.31	1.81	1.82	2.01	2	Rgnef	Rho-guanine nucleotide exchange factor,Rho-guanine nucleotide exchange factor,Rho-guanine nucleotide exchange factor,
110606	6.28	5.41	3.53	5.22	4.88	3.31	4.42	8.11	6.13	5.18	5.38	3.6	7.59	6.4	4.19	3.94	6.73	5.47	6.57	8.16	Fntb	farnesyltransferase, CAAX box, beta
110611	126.9	158.69	115.27	155.88	137.44	124.23	116.02	125.33	121.04	126.48	126.17	129.11	117.64	121.25	109.14	117.04	114.07	181.19	188.9	180.69	Hdlbp	high density lipoprotein binding protein,high density lipoprotein binding protein,high density lipoprotein binding protein,
110616	1.24	1.85	2.45	3.11	2.62	3.91	3.44	3.56	3.88	5.42	4.08	6.43	5.24	7.1	4.16	6.19	8.57	3.74	2.64	2.27	Atxn3	ataxin 3,ataxin 3,
110637	0.03	0	0.03	0	0.02	0.03	0	0.06	0	0.03	0	0	0.02	0.11	0	0	0.04	0.03	0.08	0.02	Grik4	glutamate receptor KA1 precursor
110639	3.99	6.38	5.43	4.17	4.22	4.55	4.95	4.78	5.77	5.77	6.92	5.56	3.79	2.52	4.22	3.53	4.93	4.49	4.56	3.79	Prps2	phosphoribosyl pyrophosphate synthetase 2
110648	0	0	0	0	0	0	0	0	0	0	0	0	0.04	0	0	0	0	0	0	0	Lmx1a	LIM homeobox transcription factor 1 alpha
110651	4.74	6.33	6.36	8.45	6.64	8.88	7.97	4.01	8.41	8.08	6.38	10.03	12.51	18.32	19.42	18.16	18.95	5.9	5.1	3.59	Rps6ka3	ribosomal protein S6 kinase polypeptide 3,ribosomal protein S6 kinase polypeptide 3,
110695	9.57	13.91	9.88	16.28	16.27	12.93	13.39	14.43	13.09	12.85	7.36	10.93	10.31	6.39	5.95	6.27	8	14.13	16.95	16.21	Aldh7a1	aldehyde dehydrogenase family 7, member A1,aldehyde dehydrogenase family 7, member A1,
110696	0.16	0.43	0.15	0.39	0.32	0.27	0.14	0.11	0.35	0.28	0.52	0.64	0.8	0.24	0.51	0.9	0.48	0.05	0.26	0.17	H2-M10.3	histocompatibility 2, M region locus 10.3
110749	0	0.46	0.29	0.31	0.47	0.46	0.29	0.73	0.41	0.59	0.77	0.33	2.17	2.17	1.12	2.27	1.51	0.36	0.23	0.32	Chaf1b	chromatin assembly factor 1 subunit B
110750	11.02	13.15	14.79	15.99	12.36	9.91	9.01	8.58	15.6	12.57	11.01	17.21	14.95	21.4	21.48	24	20.1	12.63	11.66	9.48	Cse1l	chromosome segregation 1-like,chromosome segregation 1-like,
110751	0.22	0.25	0.27	0.4	0.35	0.15	0.32	0.38	0.29	0.36	0.38	0.29	0.54	0.65	0.22	0.38	0.52	0.6	0.34	0.53	Adam33	a disintegrin and metallopeptidase domain 33,a disintegrin and metallopeptidase domain 33,
110784	2.98	5.93	3.04	4.29	3.71	2.53	2.68	4.38	3.74	3.69	2.3	3.09	1.72	2	2.29	1.48	1.39	6.59	5.8	5.75	Nr3c2	nuclear receptor subfamily 3, group C, member 2
110789	0	0	0.01	0	0.01	0	0	0.01	0	0.01	0	0.01	0	0	0	0.01	0.01	0	0	0	Gpr98	G protein-coupled receptor 98,G protein-coupled receptor 98,G protein-coupled receptor 98,
110794	0	0	0	0	0	0	0	0.28	0	0.07	0.15	0.16	0.04	0.39	0	0.3	0.02	0	0	0	Cebpe	CCAAT/enhancer binding protein epsilon
110796	8.09	12.94	9.3	9.41	9.75	7.4	8.04	13.33	8.6	10.24	9.68	10.37	19.01	21.39	10.86	15.52	15.09	9.91	11.23	12.68	Tshz1	teashirt zinc finger family member 1,teashirt zinc finger family member 1,
110805	0	0	0	0	0	0	0	0	0	0	0	0	0	0	0	0	0	0.04	0	0	Foxe1	forkhead box E1 (thyroid transcription factor
110809	14.87	6.97	10.31	31.8	51.74	11.29	24.85	53.62	23.53	34.26	19.2	18.72	23.65	29.63	6.97	13.65	17.65	29.94	30.06	39.48	Sfrs1	splicing factor, arginine/serine-rich 1 isoform
110816	5.44	5.3	3.97	4.56	4.84	5.03	4.58	6.58	5.36	6.26	5.62	5.78	4.44	5.77	3.05	3.18	3.95	5.47	5.22	5.49	Pwp2	PWP2 periodic tryptophan protein homolog
110821	34.84	33.15	26.68	36.23	27.05	28.65	26.17	21.08	24.47	23.66	21.67	25.87	8.95	6.48	7.97	8.63	9.61	33.52	32.42	30.31	Pcca	propionyl-Coenzyme A carboxylase, alpha
110826	647.07	638.66	423.72	550.87	460.41	298	381.99	476.15	347.96	359.01	404.62	306.7	177.46	144.26	108.6	163.12	144.15	453.39	519.75	511.48	Etfb	electron transferring flavoprotein, beta
110829	18.32	33.52	26.29	28	22.93	18.85	16.14	27.29	28.45	26.71	22.21	29.95	25.65	35.95	27.15	24.88	28.87	37.72	34.29	33.88	Lims1	LIM and senescent cell antigen-like domains 1
110834	0	0	0	0	0	0	0	0	0	0	0	0	0	0	0	0	0.03	0	0	0	Chrna3	cholinergic receptor, nicotinic, alpha,cholinergic receptor, nicotinic, alpha,
110835	0	0	0	0	0	0	0	0.16	0	0	0	0	0	0	0	0.21	0.03	0	0	0	Chrna5	cholinergic receptor, nicotinic, alpha,cholinergic receptor, nicotinic, alpha,
110842	535.98	432.53	422.14	538.28	455.81	645.18	536.51	313.33	323.79	327.61	364.94	376.1	107.18	96.68	100.73	116.52	118.24	459.76	435.04	395.94	Etfa	electron transferring flavoprotein, alpha
110854	21.35	26.98	23.07	19.71	27.99	28.62	27.58	26.54	22.47	23.1	16.98	20.41	27.11	35.05	21.67	29.17	23.95	23.97	31.68	26.54	Ppp2r4	protein phosphatase 2A, regulatory subunit B (PR
110862	0	0	0	0	0	0	0	0	0	0	0	0	0	0	0	0	0.02	0	0	0	Kcnq3	potassium voltage-gated channel, subfamily Q,
110876	0.09	0.23	0.11	0.23	0.13	0.17	0.16	0.09	0.2	0.11	0.17	0.14	0.32	0.38	0.2	0.27	0.28	0.13	0.11	0.06	Scn2a1	sodium channel, voltage-gated, type II, alpha 1
110877	0.03	0	0.06	0	0.07	0.05	0.15	0.21	0.18	0.11	0	0.1	0.07	0.48	0.65	0.19	0.11	0.07	0	0.09	Slc18a1	solute carrier family 18, member 1,solute carrier family 18, member 1,solute carrier family 18, member 1,
110880	6.82	9.48	7.06	8.58	7.63	6.65	6.44	6.16	7.64	7.49	7.79	7.72	2.51	2.21	1.54	1.88	2.29	10.33	10.53	12.45	Scn4a	sodium channel, voltage-gated, type IV, alpha
110886	0	0	0.03	0	0	0	0	0	0	0	0	0	0	0	0	0	0	0	0	0	Gabra5	gamma-aminobutyric acid (GABA-A) receptor,,gamma-aminobutyric acid (GABA-A) receptor,,
110891	0.3	0.66	0.3	0.71	0.36	0.35	0.31	0.91	0.97	0.4	0.57	0.43	0.6	0.91	0.19	0.63	0.45	0.78	1.11	1.06	Slc8a2	solute carrier family 8 (sodium/calcium
110893	0.03	0.05	0.02	0.02	0.11	0.04	0.03	0	0	0.09	0	0.09	0	0.04	0	0.2	0.07	0	0.11	0.04	Slc8a3	solute carrier family 8 (sodium/calcium,solute carrier family 8 (sodium/calcium,solute carrier family 8 (sodium/calcium,
110895	0.34	0.44	0.34	0.57	0.3	0.27	0.45	0.16	0.12	0.32	0.22	0.28	0.26	0.1	0.07	0.31	0.21	0.67	0.48	0.73	Slc9a4	solute carrier family 9 (sodium/hydrogen
110902	0.65	0.57	1.44	0.22	0.37	0.29	0.09	0.03	0.39	0.26	0.32	0.42	0.18	0.26	0.04	0.03	0.06	0.4	0.16	0.68	Chrna2	cholinergic receptor, nicotinic, alpha
110911	14.07	24.62	18.69	23.57	21.54	17.62	17.48	20.39	24.35	18.47	17.89	20.94	25.82	34.6	23.29	27.3	27.35	31.03	26.18	30.08	Cds2	phosphatidate cytidylyltransferase 2
110935	0	0	0	0	0.03	0	0.02	0	0.04	0.06	0	0	0.1	0	0.03	0	0	0.04	0	0	Atp6v1b1	ATPase, H+ transporting, lysosomal V1 subunit
110948	1.36	1.95	1.13	2.24	2.04	1.7	1.81	2.15	1.99	2.09	1.44	1.34	2.6	2.44	1.03	1.86	2.54	2.31	3.6	3.04	Hlcs	holocarboxylase synthetase
110954	390.96	372.05	310.06	367.7	275.24	279.02	274.1	468.06	290.74	320.69	380.41	305.35	753.84	513.77	545.19	698.73	734.9	345.71	343.04	340.89	Rpl10	ribosomal protein 10,ribosomal protein 10,
110957	0.13	0.09	0.46	0.11	0.33	0.2	0.19	0.11	1.07	0.33	0.14	0.47	0.34	0.33	0.44	0.38	0.31	0.17	0.13	0.02	D1Pas1	PL10 protein
110958	0.17	0	0	0.04	0.04	0	0.02	0.04	0.11	0.14	0.06	0.05	0.24	0.12	0.28	0.18	0.23	0.03	0	0.14	D6Mm5e	hypothetical protein LOC110958,hypothetical protein LOC110958,
110959	9.35	4.45	9.29	8.13	9.68	6.12	6.59	9.35	12.18	8.96	12.89	7.9	11.79	9.6	8.92	6.51	9.84	9.47	9.5	10.78	Nudt19	nudix (nucleoside diphosphate linked moiety
110960	17.82	16.38	15.91	21.59	21.2	16.85	23.13	24.47	20.43	19.73	18.05	18.62	17.87	20.25	14.33	14.48	16.7	22.38	21.33	20.65	Tars	threonyl-tRNA synthetase
110962	5.42	4.38	6.12	5.02	6.48	5.68	6.18	11.87	8.53	5.65	8.15	4.71	9.14	6.61	5.95	4.3	6.21	9.28	9.32	10.38	Mbd6	methyl-CpG binding domain protein 6,methyl-CpG binding domain protein 6,
111173	6.29	10.19	5.64	11.6	8.3	10.96	10.84	7.32	7.56	7.67	3.5	6.8	4.97	7.42	2.28	4.56	3.49	8.8	11.74	9.78	Erc1	Rab6-interacting protein 2 isoform 1,Rab6-interacting protein 2 isoform 1,
111175	7.47	4.15	4.79	5.29	4.43	4.12	3.63	5.03	4.63	4.67	3.31	5.15	5.48	4.41	4.48	2.94	3.71	6.49	6.39	5.2	Pecr	peroxisomal trans 2-enoyl CoA reductase,peroxisomal trans 2-enoyl CoA reductase,
112403	4.41	3.25	3.68	4.73	4.9	5.26	7.94	7.54	3.5	4.29	4.18	3.31	6.41	7.03	5.33	5.82	6.05	5.12	6.43	5.9	Dom3z	DOM-3 homolog Z
112405	75.13	58.29	70.51	84.39	88.04	50.72	63.94	77.54	64.47	57.29	55.58	49.34	46.39	38.09	29.29	33.15	39.85	103.46	104.35	116.88	Egln1	EGL nine homolog 1
112406	23.93	16.85	15.93	27.66	36.09	16.39	20.33	38.12	26.8	25.86	24.88	20.59	23.69	29.48	14.84	18.08	19.15	29.6	34.05	35.1	Egln2	EGL nine homolog 2,EGL nine homolog 2,
112407	39.41	36.55	30.3	29.19	32.88	23.14	25.08	24.03	26.36	19.74	19.89	16.28	43.29	36.86	29.43	36.49	42.16	39.19	38.39	37.7	Egln3	EGL nine homolog 3
112415	0.65	0.97	0.92	1.58	2.06	1.3	1.85	2.42	2.14	1.6	1.67	1.99	0.94	1.26	2.75	0.81	1.2	1.73	1.24	1.17	C030039L03Rik	hypothetical protein LOC112415,hypothetical protein LOC112415,
112418	0.05	0.27	0.1	0.26	0.04	0.3	0.17	1.35	1.23	0.44	0.65	1.02	0.11	0	0	0.12	0.14	0.63	0.64	0.62	1700102P08Rik	hypothetical protein LOC112418
112419	2.73	2.05	2.78	2.18	1.88	2.55	2.25	1.29	1.73	0.78	1.89	1.25	0.47	0.15	0.33	0.55	0.5	1.27	1.37	1.75	2010002M12Rik	hypothetical protein LOC112419
112422	1.82	0.99	4.37	4.56	1.81	2.42	2.74	1.34	3.88	5.89	1.91	5.02	1.76	3.96	8.91	5.63	4.64	1.45	0.19	1.37	2610305D13Rik	hypothetical protein LOC112422,hypothetical protein LOC112422,
11287	0.21	0.34	0.41	0.34	0.35	0.31	0.25	0.23	0.35	0.21	0.18	0.12	0.04	0.05	0.04	0.06	0.08	0.24	0.41	0.17	Pzp	pregnancy zone protein
11298	0	0	0.12	0	0	0.05	0	0.17	0.09	1.47	0.23	0.24	0	0.19	0	0	0	0.15	0	0	Aanat	arylalkylamine N-acetyltransferase
11302	0.79	0.81	0.85	1.14	0.67	0.75	0.76	1.98	1.59	0.86	0.52	0.83	1.2	1.01	0.79	0.69	0.79	1.28	1.7	1.48	Aatk	apoptosis-associated tyrosine kinase,apoptosis-associated tyrosine kinase,apoptosis-associated tyrosine kinase,
11303	1.38	2.8	1.79	3.06	2.76	3.01	3	3.04	3.35	3.28	2.68	3.36	7.96	5.6	12.07	4.33	7.88	4.32	2.73	4.33	Abca1	ATP-binding cassette 1, sub-family A, member 1
11304	0.27	0.18	0.2	0.29	0.34	0.37	0.36	0.18	0.21	0.24	0.22	0.13	0.31	0.36	0.1	0.36	0.21	0.24	0.2	0.24	Abca4	ATP-binding cassette, sub-family A, member 4
11305	7.31	10.19	8.39	11.68	11.89	6.23	7.54	15.6	12.87	12.22	12.45	10.43	8.58	9.43	6.79	5.7	6.95	14.74	15.7	16.34	Abca2	ATP-binding cassette, sub-family A (ABC1),
11307	0.93	0.99	0.44	1.71	1.23	0.99	0.98	1.98	1.6	1.57	2.44	1.45	2.44	1.96	4.28	0.63	2.57	2.37	2.17	2.5	Abcg1	ATP-binding cassette, subfamily G, member 1
11308	8.34	9.65	6.8	8.69	11.34	12.36	10.04	16.59	18.52	25.17	26.5	26.24	27.18	28.27	34.14	32.97	28.62	7.89	8.69	8.88	Abi1	spectrin SH3 domain binding protein 1 isoform 4,spectrin SH3 domain binding protein 1 isoform 4,
11350	8.14	10.84	7.52	13.22	14.65	14.33	13.76	22.07	13.92	15.8	15.22	12.52	14.37	15.45	7.67	10.55	11.18	15.46	18.91	17.96	Abl1	v-abl Abelson murine leukemia oncogene 1,v-abl Abelson murine leukemia oncogene 1,v-abl Abelson murine leukemia oncogene 1,v-abl Abelson murine leukemia oncogene 1,
11352	1.93	3.4	2.43	3.08	3.78	2.79	3.5	3.28	3.97	3.54	2.83	3.6	4.14	4.8	3.13	4.03	3.6	3.27	3.65	2.56	Abl2	v-abl Abelson murine leukemia viral oncogene 2
11363	659.58	646.05	526.3	787.52	602.71	481.86	544.03	559.43	555.04	594.41	485.61	623.01	336.97	400.59	300.7	332.56	334.99	762.69	728.68	712.53	Acadl	acyl-Coenzyme A dehydrogenase, long-chain
11364	666.42	643.34	505.01	798.25	548.28	390.06	472.88	568.87	553.5	529.4	448.22	530.18	154.78	199.94	140.55	151.92	143.47	800.34	828.2	888.16	Acadm	acyl-Coenzyme A dehydrogenase, medium chain
11370	510.18	433.09	358.96	477.87	482.13	449.84	499.91	505.48	411.34	444.72	410.36	401.68	167.07	167.14	126.52	161.4	143.9	501.1	536.5	528.61	Acadvl	acyl-Coenzyme A dehydrogenase, very long chain
113845	0	0	0	0.03	0.03	0	0	0	0	0	0	0	0	0	0	0	0	0	0	0	V1ra3	vomeronasal 1 receptor, A3
113846	0	0	0	0.03	0.06	0	0	0	0	0	0	0	0	0	0	0	0	0	0	0	V1ra4	vomeronasal 1 receptor, A4
113847	0	0	0	0.03	0	0.03	0	0	0	0	0	0	0	0	0	0	0	0	0	0	V1ra5	vomeronasal 1 receptor, A5
113848	0	0	0	0.03	0	0.15	0.05	0.05	0	0	0	0	0	0	0	0	0	0	0	0	V1ra6	vomeronasal 1 receptor, A6
113849	0	0	0.1	0	0	0	0	0	0	0	0	0	0.04	0	0.03	0	0	0	0	0	V1ra7	vomeronasal 1 receptor, A7
113850	0	0	0.12	0	0	0	0	0	0	0	0	0	0.04	0	0.04	0	0	0	0	0	V1ra8	vomeronasal 1 receptor, A8
113852	0	0	0	0	0	0	0	0	0	0	0	0	0	0	0	0.04	0.04	0	0	0	V1rb1	vomeronasal 1 receptor, B1
113853	0	0	0.07	0	0	0	0	0	0.1	0	0	0	0.04	0.11	0.2	0.04	0.08	0.08	0	0	V1rb3	vomeronasal 1 receptor, B3
113855	0	0	0	0	0	0	0	0	0	0	0	0	0.04	0	0	0	0.04	0	0	0	V1rb7	vomeronasal 1 receptor, B7
113856	0	0	0	0	0	0	0	0	0	0	0	0	0.04	0	0	0	0.02	0	0	0	V1rb8	vomeronasal 1 receptor, B8
113868	25	22.27	16.6	24.59	16.84	14.61	16.42	35.61	22.2	26.93	17.38	19.76	11.95	13.79	9.17	9.09	8.95	31.67	36.54	41.59	Acaa1a	acetyl-Coenzyme A acyltransferase 1
11409	112.28	113.64	102.06	103.89	60.22	40.34	46.36	163.72	107.16	119.67	118.94	98.25	44.57	44.27	26.7	35.25	36.84	134.49	138.04	190.8	Acads	acyl-Coenzyme A dehydrogenase, short chain
114128	23.33	24.01	26.2	24.24	29.36	21.64	17.08	41.67	34.09	31.1	29.86	31.02	20.75	14.17	17.06	14.01	24.45	32.04	29.7	26.66	Laptm4b	lysosomal-associated protein transmembrane 4B
114142	0.3	1.43	0.55	0.47	0.34	0.49	0.53	0.42	0.3	0.62	0.29	0.54	1.35	1.04	1.95	1.05	1.25	0.64	0.6	0.57	Foxp2	forkhead box P2,forkhead box P2,
114143	36.14	49.31	36.2	34.36	47.24	35.85	41.76	58.74	51.57	55.17	38.9	43.88	67.77	48.31	59.74	42.82	54.45	54.89	56.23	53.21	Atp6v0b	ATPase, H+ transporting, lysosomal V0 subunit B
11416	4.86	4.32	4.52	4.38	4.57	3.84	4.6	5.24	4.58	5.01	5.13	5.89	4.94	2.86	5.95	2.81	6.04	4.74	4.65	4.65	Slc33a1	solute carrier family 33 (acetyl-CoA,solute carrier family 33 (acetyl-CoA,
11418	0	0.26	0	0	0	0	0	0	0	0	0	0	0	0	0	0	0	0	0	0	Accn1	amiloride-sensitive cation channel 1, neuronal
11419	0.51	0.54	0.21	0.39	0.82	0.72	1.06	0.37	0.4	0.58	0.68	0.49	0.23	0.21	0	0.07	0.28	0.76	0.91	0.71	Accn2	amiloride-sensitive cation channel 2, neuronal
11421	7.56	12.53	10.09	20.98	15.06	10.52	12.04	22.35	21.19	27.84	27.26	24.8	72.98	68.26	59	60.72	64.89	21.11	19.78	29.75	Ace	angiotensin I converting enzyme
114228	0	0	0	0	0.05	0	0	0.08	0	0	0	0	0	0	0	0	0	0	0	0	Prss1	protease, serine, 1
114229	0.06	0.06	0.06	0.12	0.18	0.16	0.07	0.3	0.28	0.06	0.12	0	0.17	0.2	0	0.04	0.18	0.04	0.16	0.44	Kiss1r	KISS1 receptor
11423	0.82	1.5	0.74	0.99	0.78	0.46	0.51	1.74	0.8	1.49	0.66	0.71	0.67	0.44	0.92	0.09	0.59	1.57	1.88	2.46	Ache	acetylcholinesterase,acetylcholinesterase,acetylcholinesterase,acetylcholinesterase,acetylcholinesterase,
114230	0	0.23	0	0	0.07	0.04	0	0.11	0	0	0	0	0.13	0.13	0.11	0.1	0.05	0	0	0	Aipl1	aryl hydrocarbon receptor-interacting
114249	0.08	0.32	0.17	0.14	0.12	0.2	0.2	0.31	0.07	0.41	0.09	0.23	0.3	0.31	0.26	0.12	0.25	0.18	0.3	0.25	Npnt	nephronectin isoform a,nephronectin isoform a,
11425	0	0	0	0	0	0	0	0	0	0	0	0	0.51	0.18	0.11	0	0.55	0	0	0	Apoc4	apolipoprotein C-IV
114255	6.99	11.85	6.6	9.79	10.51	11.66	10.32	12.47	6.15	7.63	7.56	7.16	5.61	6.06	3.72	3.6	2.98	10.94	11.88	11.35	Dok4	docking protein 4,docking protein 4,
11428	8.44	11.68	8.95	9.2	9.74	12.82	12.47	9.82	7.96	7.93	8.49	7.98	12.78	13.01	10.22	11.53	12.52	13.17	15.69	12.2	Aco1	aconitase 1
11429	669.57	677.62	586.58	744.44	833.43	651.52	666.41	715.83	626.66	671.42	595.05	637.05	313.23	315.24	224.36	256.11	259.49	738.64	741.1	783.2	Aco2	aconitase 2, mitochondrial
11430	76.26	90.42	76.19	107.29	116.82	65.69	74.4	94.58	99.18	97.33	81.49	94.67	62.81	64.45	48.39	51.35	54.09	123.03	112.3	117.63	Acox1	acyl-Coenzyme A oxidase 1, palmitoyl,acyl-Coenzyme A oxidase 1, palmitoyl,
114301	30.93	44.4	27.82	28.61	31.55	28.94	30.21	26.06	24.27	25.79	21.69	27.33	31.62	48.2	29.62	47.53	34.2	29.5	28.71	31.12	Palmd	palmdelphin,palmdelphin,
11431	15.61	13.94	17.11	17.52	8.96	17.23	14.62	12.22	13.56	18.16	13.62	23.01	20.45	36.78	36.86	29.63	33.05	16.8	18.39	11.73	Acp1	acid phosphatase 1, soluble
11432	5.83	10.37	6.9	7.91	9.48	4.43	6.35	14.35	9.42	10.56	8.66	10.09	16.17	14.25	14.33	14.78	16.17	9.24	10.71	10	Acp2	acid phosphatase 2, lysosomal
11433	0.91	0.76	0.37	0.58	1.22	1.44	1.13	2.04	0.34	0.34	1.43	0.35	21.38	9.79	13.66	7.24	18.96	1.07	0.99	1.28	Acp5	acid phosphatase 5, tartrate resistant
114332	2.43	4.44	4.59	5.75	6.02	8.53	9.95	5.8	6.13	2.79	2.86	4.09	33.15	26.37	9.08	28.12	31.33	6.65	6.64	3.56	Lyve1	lymphatic vessel endothelial hyaluronan receptor
11434	0.39	0.31	0.27	0.26	0.45	0.15	0.3	0.55	0.04	0.1	0.51	0.06	0.43	1.36	0.6	1.02	0.44	0.17	0.29	0.08	Acr	preproacrosin
11435	0.09	0	0.12	0	0	0.05	0.15	0	0.22	0.16	0.26	0.16	0.13	0	0	0	0.09	0.14	0.28	0.17	Chrna1	cholinergic receptor, nicotinic, alpha 1
11438	0	0	0	0	0	0.02	0.03	0	0	0	0	0	0	0.06	0	0	0	0	0	0	Chrna4	cholinergic receptor, nicotinic, alpha 4
11441	0.03	0	0	0.06	0	0.05	0.08	0.11	0	0	0	0.04	0.06	0.09	0	0	0.03	0.1	0	0	Chrna7	cholinergic receptor, nicotinic, alpha 7
11443	1.96	2.75	1.99	2.18	3.05	1.93	2.49	3.27	3.03	1.91	2.21	2.28	4.33	3.33	3.18	3	4.65	2.88	2.79	3.01	Chrnb1	cholinergic receptor, nicotinic, beta
11444	0.42	0.09	0.29	1.29	1.81	1.35	1.79	1.19	1.06	1.61	1.02	0.87	0.48	0.31	0.14	0.21	0.42	0.35	0.13	0.1	Chrnb2	neuronal nicotinic acetylcholine receptor beta
114479	0.07	0	0	0	0	0.06	0.02	0.07	0	0.13	0	0	0	0	0	0	0.01	0	0	0	Slc5a5	solute carrier family 5 (sodium iodide
11448	0.12	0	0	0	0	0.03	0	0.04	0.09	0.22	0	0.04	0	0	0	0.07	0	0	0	0	Chrne	cholinergic receptor, nicotinic, epsilon
11449	0	0	0	0.07	0.02	0	0.06	0.19	0	0	0	0.06	0	0	0	0	0	0	0.11	0	Chrng	cholinergic receptor, nicotinic, gamma
11450	1.09	1.38	0.87	0.33	0.53	0.62	1.25	2.43	1.19	0.26	0.17	0.37	1.39	0.29	0.96	0.75	1.4	0.89	1.92	0.33	Adipoq	adiponectin, C1Q and collagen domain containing
114570	0.45	1.02	0.54	0.26	0.37	0.29	0.32	0.15	0	0.41	0	0.15	1.22	0.87	0.31	0	0.53	1.06	0.29	0.32	Crip3	cysteine-rich protein 3 isoform TLP-A
114584	26.28	42.66	31.7	29.41	25.32	20.29	28.4	52.06	38.52	37.56	30.59	32.83	114.65	123.13	84.7	91.01	112.06	36.01	33.99	45.02	Clic1	chloride intracellular channel 1
114585	10.13	10.18	7.45	7.09	8.9	6.51	5.9	11.06	6.97	8.88	7.74	6.74	8.91	5.4	5.95	5.25	6.14	7.19	9.94	8.98	D17H6S53E	G4 protein
11459	231.77	300.92	229.65	566.58	411.71	267.35	232.18	364.68	330.8	486.45	599.77	406.53	516.27	526.75	256.72	583.52	406.3	410.88	376.58	442.56	Acta1	actin, alpha 1, skeletal muscle
114601	66.33	54.22	54.46	80.95	72.51	44.71	51.64	92.54	63.34	62.92	52.94	48.29	58.5	69.71	49.54	46.38	44.36	99.11	100.73	100.9	Ehbp1l1	tangerin,tangerin,tangerin,tangerin,
114602	0.21	0.13	0.03	0.08	0.23	0.31	0.23	1.22	0.52	0.96	0.13	0.42	0.12	0.06	0.13	0	0.21	0.08	0.18	0.25	Zmynd10	zinc finger, MYND domain-containing 10
114606	3.56	2.25	2.66	3.98	2.29	1.57	2.48	3.59	3.29	3.36	1.74	2.82	3.19	2.62	2.22	2.13	2.35	3.44	5.71	4.81	Tle6	transducin-like enhancer protein 6,transducin-like enhancer protein 6,transducin-like enhancer protein 6,
11461	285.21	330.75	258.29	208.07	190.81	148.8	141.56	515.91	293.99	286.45	312.58	267.03	991.01	967	581.03	844.66	819.42	255.56	279.75	292.3	Actb	actin, beta, cytoplasmic
114615	3.53	2.13	2.2	4.04	5.28	3.43	6.3	5.3	2.21	3.65	3.78	3.19	3.1	3.03	2.07	2.2	3.15	2.9	2.84	4.3	Elac1	elaC homolog 1
11464	6150.11	6668.29	5689.56	5387.13	4994.19	3952.32	3187.41	5169.93	4357.44	3291.53	3623.7	3349.1	4239.64	3089.28	4362.61	3294.05	3914.27	6818.51	7849.92	6318.16	Actc1	actin, alpha, cardiac
114641	429.55	429.84	373.13	500.9	399.3	984.37	1039.79	534.82	253.47	243.16	411.05	232.64	598	286.95	446.62	489.24	545.47	413.22	388.74	410.19	Rpl31	ribosomal protein L31
114642	0	0	0	0	0	0	0	0	0	0	0	0	0.07	0	0	0	0	0	0	0	Brdt	bromodomain, testis-specific isoform B
114643	0.18	0	0.56	0.14	0.23	0.22	0.05	0.35	0	0.26	0	0.14	1.06	0.34	0.57	0.48	0.63	0.13	0.19	0.51	Oas1c	2'-5' oligoadenylate synthetase 1C
114644	0.12	0.13	0.07	0.02	0.13	0.02	0.07	0.07	0.1	0	0.2	0	0.93	0.44	0.42	0.43	0.75	0.11	0.09	0.03	Slc13a3	solute carrier family 13 (sodium-dependent
11465	182.98	222.41	168.86	175.78	186.03	107.19	99.79	700.4	424.56	463.03	514.53	424.26	588.15	500.91	380.26	517.46	485.2	162.51	175.02	183.23	Actg1	actin, gamma, cytoplasmic 1
114652	0	0	0	0	0	0.08	0.07	0	0	0	0	0	0	0	0	0	0	0	0	0	Ly6g5c	lymphocyte antigen 6 complex G5C
114654	0	0	0	0	0	0.18	0	0.15	0	0	0.13	0.07	0	0	0	0	0.12	0.25	0.55	0.59	Ly6g6d	lymphocyte antigen 6 complex G6D
114663	6.35	6.19	5.89	3.85	3.46	2.8	3.33	4.62	3.02	1.95	3.92	2.09	5.55	6.54	4.63	4.24	3.38	6.28	6.53	4.71	Impa2	inositol (myo)-1(or 4)-monophosphatase 2
114664	13.85	11.16	10.81	10.39	8.66	11.04	10.14	10.64	10.64	10.74	11.3	9.94	20.03	18.09	20.13	14.54	20.5	16.79	13.8	12.22	Hsd17b11	dehydrogenase/reductase (SDR family) member 8,dehydrogenase/reductase (SDR family) member 8,
114666	0	0	0.22	0.07	0	0	0	0.13	0	0	0	0	0	0	0	0	0	0	0	0.13	Krtap5-5	keratin associated protein 5-5
114674	1.99	2.18	1.56	2.77	2.07	1.98	2.34	3.33	2.05	1.96	2.4	1.89	2.25	2.64	1.59	2	2.27	3.44	4.77	3.41	Gtf2ird2	gtf2ird2
114679	24.14	13.73	14.34	17.01	24.63	10.32	12.27	36.29	20.46	20.9	24.63	14.5	53.2	41.62	21.08	23.39	35.78	28.74	29.62	29.78	Selm	selenoprotein M precursor
11468	2.21	2.12	1.45	1.1	0.97	1.2	1.44	1.04	1.5	1.97	0.87	2.39	4.52	1.75	3.08	1.36	3.25	1.77	1.27	1	Actg2	actin, gamma 2, smooth muscle, enteric,actin, gamma 2, smooth muscle, enteric,
11470	0	0.04	0.12	0.02	0	0	0	0	0	0	0	0.02	0	0	0	0.03	0.01	0	0	0	Actl7a	actin-like 7a
11471	0	0	0	0.04	0	0	0	0	0	0	0	0.03	0.06	0.08	0	0	0.03	0	0	0.07	Actl7b	actin-like 7b
114712	0	0	0	0	0	0.12	0	0	0	0	0	0	0	0	0	0	0	0	0	0	Ferd3l	nephew of atonal 3
114713	1.12	2.35	1.7	1.61	1.69	1.18	1.34	1.45	2.21	1.96	1.27	2.06	2.78	2.74	2.21	2.99	3.08	1.61	1.02	1.37	Rasa2	RAS p21 protein activator 2
114714	0.69	0.96	0.71	0.76	1.65	1.62	1.19	0.62	0.24	0.81	0.49	0.43	0.75	0.44	0.15	0.59	1.21	1.15	1.01	0.63	Rad51c	Rad51 homolog c
114715	2.83	4.96	4.87	5.13	4.88	6.26	5.38	4.49	8.03	5.72	3.41	6.72	8.05	13.84	15	14.16	12.56	4.3	4.27	2.92	Spred1	sprouty-related protein 1 with EVH-1 domain
114716	4.76	6.26	4.17	5.93	8.18	4.43	5.68	9.46	5.81	7.46	5.3	6.46	7.52	8.77	4.57	3.97	6.38	7.73	7.14	8.59	Spred2	sprouty-related protein with EVH-1 domain 2
11472	669.73	762.88	553.16	733.22	644.17	421.31	396.17	613.08	576.4	502.48	452.81	463.59	761.36	723.44	529.88	621.55	636.32	880.25	850.07	877.47	Actn2	actinin alpha 2
11474	4.23	8.31	4.71	4.64	13.12	3.85	3.61	2.63	6.79	7.64	3.43	7.57	4.19	9.99	4.41	3.97	3.59	3.86	3.85	4.8	Actn3	actinin alpha 3,actinin alpha 3,
114741	8.38	8.26	8.89	11.2	9.32	13.26	12.56	7.28	10.04	10.82	8.26	12.16	12.56	19.44	16.28	18.06	14.97	8.67	8.24	6.35	Supt16h	suppressor of Ty 16 homolog
11475	52.15	49.98	58.26	38.79	64.69	40.53	38.55	73.37	49.64	42.54	59	42.96	142.64	131.78	82.25	126.88	128.92	62.14	82.53	51.82	Acta2	actin, alpha 2, smooth muscle, aorta
11477	5.12	5.99	5.73	6.72	6.88	7.84	7.31	6.4	5.63	6.19	6.48	6.43	8.67	7.78	8.54	7.2	7.97	6.96	9.39	6.11	Acvr1	activin A receptor, type 1,activin A receptor, type 1,activin A receptor, type 1,activin A receptor, type 1,
114774	0.44	0.52	0.66	0.96	1.63	0.73	1.09	1.23	0.89	0.88	0.49	0.79	2.32	1.63	0.82	0.88	1.29	0.52	1.47	1.31	Pawr	PRKC, apoptosis, WT1, regulator
11479	3.98	4.99	3.7	6.07	5.92	4.03	4.72	5.36	5.22	5.63	3.55	3.54	6.71	6.62	5.74	6.56	6.38	6.16	6.16	5.61	Acvr1b	activin A receptor, type 1B
11480	4.11	4.63	3.66	5.87	4.2	4.48	4.69	3.67	5.43	6.2	3.19	7.24	3.35	7.7	5.74	7.62	4.81	3.61	2.99	2.3	Acvr2a	activin receptor IIA
11481	1.82	0.65	1.18	1.08	0.94	0.94	0.72	2.07	1.57	2.25	1.14	1.39	0.85	0.91	1.47	0.4	0.72	2.24	1.25	1.61	Acvr2b	activin receptor IIB,activin receptor IIB,
11482	13.12	11.56	10.85	12.82	14.72	9.02	8.18	28.13	17.28	15.65	12.83	13.34	16.01	17	11.95	11.34	13.64	17.04	18.98	19.45	Acvrl1	activin A receptor, type II-like 1,activin A receptor, type II-like 1,activin A receptor, type II-like 1,activin A receptor, type II-like 1,activin A receptor, type II-like 1,
11484	1.66	1.12	2.08	1.66	0.96	3	3.24	0.61	0.19	1.51	0.37	1.89	0.52	0.75	1.13	2.49	1.02	1.55	0.97	1.05	Aspa	aspartoacylase (aminoacylase) 2,aspartoacylase (aminoacylase) 2,
11486	0.52	3.96	0.23	0.29	1.15	0.41	0.91	0.59	0.7	0.51	3.5	1.15	7.53	6.11	5.67	4.81	6.36	0.28	0.49	0.13	Ada	adenosine deaminase
114863	17.39	7.2	10.6	31.46	34.11	18.2	29.99	49.9	21.75	40.95	25.71	35.56	18.87	19.57	7.62	9.56	18.39	31.27	33	31.86	Prosc	proline synthetase co-transcribed isoform a,proline synthetase co-transcribed isoform a,
114868	0	0	0	0	0	0	0	0	0	0	0	0	0.03	0	0	0	0	0	0	0	Psg25	pregnancy-specific glycoprotein 25
11487	9.06	12.78	13.48	14.28	17.42	17.6	13.46	10.17	14.13	15.2	10.93	16.68	19.29	23.43	27.81	21.7	21.63	12.28	11.31	9.56	Adam10	a disintegrin and metallopeptidase domain 10
114871	0	0	0	0	0	0	0	0	0	0	0	0	0.03	0	0	0	0.01	0	0	0	Psg28	pregnancy-specific glycoprotein 28
114873	0	0	0	0	0.01	0	0	0	0	0	0	0	0	0	0	0.01	0	0	0	0	Dscaml1	Down syndrome cell adhesion molecule-like 1
114874	2.55	3.74	2.11	2.4	3.07	2.03	2.13	4.13	2.96	3.36	2.22	3.22	3.94	3.54	4.08	3.42	3.65	3.18	3.31	3.93	Ddhd1	DDHD domain containing 1 isoform 2
114875	0	0	0	0	0	0	0.01	0	0.06	0	0.08	0	0	0	0	0	0	0	0	0	Plcz1	phospholipase C, zeta 1
11488	3.3	4.66	4.88	6.47	9.69	4.49	5.59	8.13	7.88	8.47	4.86	6.62	3.41	3.49	2.52	3.09	2.75	8.84	8.02	9.97	Adam11	a disintegrin and metallopeptidase domain 11,a disintegrin and metallopeptidase domain 11,
114886	30.95	22.54	27.79	38.95	60.52	26.61	30.78	59.66	32.74	37.85	33.25	28.83	71.58	57.43	43.69	46.8	58.02	46.53	41.75	45.53	Cygb	cytoglobin
11489	0.03	0.52	0.18	0.27	0.42	0.14	0.17	0.07	0.07	0.09	0.33	0.13	3.71	5.5	2.1	4.56	3.71	0.22	0.26	0.09	Adam12	a disintegrin and metalloprotease domain 12,a disintegrin and metalloprotease domain 12,
114893	11.73	9.65	9.66	15.61	8.69	19.2	15.62	10.44	14.93	16.64	19.5	19.51	12.54	14.59	13.99	14.22	16.86	7.88	5.4	5.23	Dcun1d1	testis derived transcript 3,testis derived transcript 3,
11490	20.93	18.22	18.34	16.89	17.87	9.29	9.46	31.16	24.22	21.44	19.86	17.15	49.13	41.97	31.28	35.27	40.29	28.8	26.9	30.72	Adam15	a disintegrin and metalloprotease domain 15
11491	14.4	15.56	14.64	17.44	16.3	15.12	16.35	13.24	15.26	14.72	11.56	15.73	10.04	14.3	14.51	13.31	12.41	13.56	14.34	14.08	Adam17	a disintegrin and metalloprotease domain 17
11492	3.65	7.88	5.24	3.49	5.68	3.38	4.42	5.24	2.56	2.57	2.81	2.51	11.16	9.2	10.71	6.6	8.69	4.57	3.38	4.67	Adam19	a disintegrin and metalloprotease domain 19
11496	0.37	0.95	1.22	1.22	1.05	1.09	1.1	0.96	1.29	0.83	1.08	0.95	2.34	2.07	2.59	1.37	2.79	1.02	0.43	0.52	Adam22	a disintegrin and metalloprotease domain 22
11497	0	0	0	0	0	0	0	0	0	0	0	0.02	0	0	0	0	0.01	0	0	0	Adam3	a disintegrin and metalloprotease domain 3,a disintegrin and metalloprotease domain 3,
11498	0.2	0.15	0.29	0.23	0.24	0.29	0.18	0.12	0.25	0.2	0.07	0.19	0.08	0.07	0.07	0.02	0.09	0.17	0.2	0.12	Adam4	a disintegrin and metallopeptidase domain 4
11499	0	0.07	0.16	0.03	0	0.05	0.27	0.03	0.28	0.34	0	0.08	0.22	0.13	0.36	0.03	0.35	0.1	0.11	0	Adam5	a disintegrin and metallopeptidase domain 5,a disintegrin and metallopeptidase domain 5,
11501	0.27	0.14	0.15	0.3	1.11	0.1	0.22	1.59	1.21	0.7	0.78	0.6	52.28	46.27	38.69	30.64	44.09	0.16	0.38	0.38	Adam8	a disintegrin and metallopeptidase domain 8,a disintegrin and metallopeptidase domain 8,
11502	13.17	19.19	13.65	20.25	21.52	18.47	20.77	17.61	21.27	18.63	12.45	16.8	64.41	75.24	54.95	59.43	60.52	19.33	20.34	20.54	Adam9	a disintegrin and metalloprotease domain 9,a disintegrin and metalloprotease domain 9,
11504	5.34	7.57	8.31	8.31	7.58	9.77	9.47	14.25	11.58	11.36	10.36	10.96	24.99	31.71	17.91	30.92	22.98	12.03	10.01	9.33	Adamts1	a disintegrin-like and metalloprotease
11512	26.27	31.53	26.07	37.4	41.22	28.39	36.19	39.24	35.41	26.25	23.14	23.4	21.87	23.38	18.02	13.99	17.7	48.21	50.09	48.14	Adcy6	adenylate cyclase 6,adenylate cyclase 6,
11513	1.46	2.5	2.87	2.31	3.17	1.2	1.16	3.19	1.62	1.67	2	1.5	11.63	5.68	8.9	5.65	9.31	2.7	2.73	2.43	Adcy7	adenylate cyclase 7
11514	0.08	0.06	0.02	0.06	0.05	0.05	0.04	0.09	0.01	0	0	0.05	0.03	0	0.14	0.03	0.07	0.17	0.07	0.1	Adcy8	adenylate cyclase 8,adenylate cyclase 8,
11515	2.96	6.49	4.62	6.44	5.72	5.34	6	5.05	5.6	4.22	5.7	4.28	5.04	6.41	4.62	3.91	4.69	6.33	7.73	7.41	Adcy9	adenylate cyclase 9,adenylate cyclase 9,
11517	1	1.5	1.28	0.92	2.12	1.14	1.32	1.04	0.47	0.9	0.78	0.85	5.22	5.33	2.96	5.27	4.55	1.18	2.05	1.26	Adcyap1r1	adenylate cyclase activating polypeptide 1
11518	33.59	41.48	36.65	42.93	50.68	38.2	42.23	35.04	37.28	38.87	33.47	39.11	49.11	48.66	50.67	43.14	49.22	41.66	44.95	40.44	Add1	adducin 1 (alpha) isoform 2
11519	0.02	0	0.18	0.06	0.05	0	0.04	0.05	0.03	0.07	0	0.07	0.14	0.09	0.07	0	0.13	0.11	0.07	0.05	Add2	adducin 2 (beta),adducin 2 (beta),adducin 2 (beta),adducin 2 (beta),adducin 2 (beta),adducin 2 (beta),
11520	29.11	32.15	24.19	28.59	27.73	24.46	24.03	33.16	29.65	31.66	25.67	30.05	132.07	91.93	101.28	99.65	126.23	33.73	35.08	42.5	Adfp	adipose differentiation related protein
11522	4.33	6.03	6.74	24.2	14.24	12.89	16.12	15.73	14.89	24.31	18.52	21.02	20.91	31.45	17.27	28.74	18.36	15.94	15.67	15.54	Adh1	alcohol dehydrogenase 1 (class I)
11529	0	0.07	0.26	0.12	0.09	0.07	0.11	0.05	0.06	0.14	0.09	0.13	0	0.12	0.21	0.14	0.04	0.04	0.1	0.11	Adh7	alcohol dehydrogenase 7 (class IV), mu or sigma
11532	32.58	35.78	29.05	35.33	43.8	35.8	39.24	31.29	22.06	24.64	23.05	27.47	27.4	29.63	19.17	32.99	27.66	39.44	39.98	35.67	Adh5	alcohol dehydrogenase 5 (class III), chi
11534	91.2	97.19	80.28	108.73	64.39	41.48	47.97	65.18	74.48	63.21	53.39	65.3	46.79	56	39.08	52.48	48.3	104.67	118.26	113.79	Adk	adenosine kinase,adenosine kinase,adenosine kinase,
11535	3.83	5.18	3.09	4.82	4.93	1.6	3.03	7.66	6.29	4.63	8.45	5.06	16.09	16.69	12.19	6.88	14.44	5.43	9.54	10.7	Adm	adrenomedullin
11536	2.53	2.51	2.5	3.14	4.06	1.74	2.48	6.77	3.45	3.19	3.67	3.72	5.28	4.15	2.74	1.56	4.84	3.17	5.09	4.76	Admr	adrenomedullin receptor
11537	3.48	1.35	2.61	1.43	1.5	1.92	2.85	6.21	3.82	1.91	0.51	0.69	0.52	0.08	1.9	0.96	1.02	6.09	5.65	2.31	Cfd	adipsin
11538	12.05	14.93	13.16	16.56	12.25	12.88	12.66	11.85	14.27	11.97	12.01	15.34	15.95	17.12	17.38	16.39	17.97	15.75	14.36	13.73	Adnp	activity-dependent neuroprotective protein,activity-dependent neuroprotective protein,
11539	3.26	3.83	3.39	4.76	7.19	3.34	3.49	4.66	4.25	3.43	2.94	2.53	5.02	3.11	4.76	2.55	4.07	6.89	9.05	6.47	Adora1	adenosine A1 receptor
11540	3.87	2.75	3.56	3.31	2.96	2.26	2.23	5.39	2.56	3.38	3.23	2.88	3.37	2.22	1.9	1.13	2.52	3.65	3.69	5.46	Adora2a	adenosine A2a receptor
11541	1.1	0.56	0.96	0.5	0.77	0.51	0.34	1.76	1.17	1.31	0.54	1.28	1.08	1.66	1.05	1.42	1.62	1.29	1.08	0.82	Adora2b	adenosine A2b receptor
11544	19.58	19.17	17.6	17.59	20.55	18.26	18.52	21.24	15.93	11.99	12.57	11.67	27.28	18.5	15.64	16.98	18.27	21.48	22.86	23.47	Adprh	ADP-ribosylarginine hydrolase
11545	16.61	21.89	15.83	18.92	18.3	15.08	14.62	16.63	14.27	13.3	11.05	13.31	14.6	11.37	8.78	9.02	12.16	18.4	23.52	21.66	Parp1	poly (ADP-ribose) polymerase family, member 1
11546	8.77	9.83	7.37	7.93	8.56	7.02	6.98	7.3	8.6	7.44	5.75	7.7	10.08	11.59	10.19	9.33	9.78	7.12	8.29	6.15	Parp2	poly (ADP-ribose) polymerase family, member 2
11548	14.57	12.25	13.47	12.55	13.49	7.81	7.24	12.82	9.65	7.59	6.69	6.28	7.31	6.4	3.43	3.25	6.35	14.4	19.11	19.04	Adra1b	adrenergic receptor, alpha 1b,adrenergic receptor, alpha 1b,adrenergic receptor, alpha 1b,
11549	1.51	1.79	1.91	3.59	3.01	2.52	2.87	1.36	1.81	1.96	1.28	1.69	1.01	1.23	0.44	0.84	0.56	3.28	2.91	5.17	Adra1a	adrenergic receptor, alpha 1a,adrenergic receptor, alpha 1a,adrenergic receptor, alpha 1a,adrenergic receptor, alpha 1a,adrenergic receptor, alpha 1a,
11550	0.75	1.55	0.8	0.82	1.31	0.48	0.74	1.01	0.73	0.47	0.62	0.26	0.41	1.38	0.13	0.48	0.46	1.42	1.85	1.5	Adra1d	adrenergic receptor, alpha 1d
11551	0	0	0	0.02	0	0	0.02	0.07	0	0	0	0.03	0.03	0	0	0	0.03	0.06	0	0.1	Adra2a	adrenergic receptor, alpha 2a
11552	0.05	0.13	0.26	0.52	0.31	0.25	0.31	0.8	0.07	0.57	0.03	0.03	0.16	0.15	0	0.41	0.24	0.31	0.31	0.24	Adra2b	adrenergic receptor, alpha 2b
11553	0.14	0.13	0	0.07	0.1	0.04	0.02	0.23	0.04	0	0.14	0.05	0.15	0.18	0	0.06	0.19	0.11	0.25	0.23	Adra2c	adrenergic receptor, alpha 2c
11554	3.57	1.45	2.35	2.67	3.49	0.47	0.92	5.08	3.42	2.54	2.13	2.04	2.41	3.02	0.34	0.82	1.58	5.26	6.22	8.73	Adrb1	adrenergic receptor, beta 1
11555	2.06	1.33	0.66	1.98	2.77	2.54	2.66	2.96	2.28	1.32	3.14	2.33	2.38	1.34	1.76	0.95	2.21	1.78	2.11	2.47	Adrb2	adrenergic receptor, beta 2
11556	0	0	0.16	0	0	0.02	0	0.27	0	0.15	0.03	0.11	0.09	0	0	0	0.07	0	0	0	Adrb3	adrenergic receptor, beta 3,adrenergic receptor, beta 3,adrenergic receptor, beta 3,
11564	29.09	34.88	24.68	28.04	22.45	13.98	17.36	41.53	29.69	32.16	26.03	27.95	24.25	27.02	18.28	20.35	21.77	39.94	34.74	40.38	Adsl	adenylosuccinate lyase
11565	106.75	91.24	82.81	128.75	101.1	75.27	107.91	98.08	73.66	70.63	62.8	58.5	176.15	121.27	93.5	102.96	143.44	148.55	161.37	171.98	Adssl1	adenylosuccinate synthetase 1
11566	3.1	1.97	4.29	4.93	5.14	6.08	4.49	4.53	5.67	7.07	7.07	7.56	10.96	13.52	16.29	17.53	14.13	3.2	1.46	1.47	Adss	adenylosuccinate synthetase, non muscle,adenylosuccinate synthetase, non muscle,
11567	0.48	0.42	0.21	0.33	0.36	0.32	0.37	0.74	0.37	0.39	0.37	0.51	0.44	0.44	0.08	0.28	0.49	0.52	0.51	0.43	Avil	advillin
11568	5.97	5.55	4.4	8.06	9.01	5.85	5.78	11.35	8.28	10.56	8.26	8	31.16	32.53	22.77	24.71	26.1	8.15	9.02	10.83	Aebp1	AE binding protein 1,AE binding protein 1,AE binding protein 1,
11569	14.49	18.96	13.76	18.55	17.12	15.69	17.08	20.8	13.49	14.5	21.71	14.8	20.44	21.79	18.65	32.25	20.38	19.91	22.24	16.45	Aebp2	AE binding protein 2 isoform 2,AE binding protein 2 isoform 2,
11576	0	0	0	0	0	0	0	0	0	0	0	0	0	0	0	0	0.03	0	0	0	Afp	alpha fetoprotein
11593	9.89	10.99	9.8	9.79	9.9	8.05	8.57	8.1	7.61	7.57	8.76	7.32	8.06	4.52	5.61	6.93	8.51	9.22	8.95	10.29	Aga	aspartylglucosaminidase
11595	0	0	0	0	0	0.01	0.01	0	0	0	0	0.03	0	0	0	0.01	0.01	0	0.03	0.03	Acan	aggrecan,aggrecan,
11596	0.31	0.14	0.3	0.12	0.28	0.17	0.19	0.21	0.11	0	0.05	0.18	2.17	2.09	0.74	3.35	1.96	0.14	0.2	0.11	Ager	advanced glycosylation end product-specific,advanced glycosylation end product-specific,
11600	5.24	7.93	6.25	4.57	7.64	7.85	7.05	1.65	3	4.11	5.87	3.82	2.29	1.47	3.42	2.36	2.73	2.7	3.77	3.43	Angpt1	angiopoietin 1,angiopoietin 1,
11601	0.79	2.08	1.24	1.45	1.19	1.34	0.91	0.94	0.96	2.07	1.22	1.26	3.21	4.44	2.93	3.55	2.92	1.02	1.31	1.34	Angpt2	angiopoietin 2
11602	0.24	0.05	0	0.04	0.11	0.07	0.04	0.22	0	0.05	0.19	0.03	1.37	0.37	1.02	0.26	0.92	0.22	0.03	0.04	Angpt4	angiopoietin 4
11603	6.57	8.16	7.25	9.47	12.11	6.32	8.37	16.48	10.12	9.94	10.39	8.72	7.2	7.01	4.78	4.87	5.83	13.25	13.8	14.95	Agrn	agrin
11604	0.33	1	0.11	0.42	0.53	0.28	0.55	0.46	0	0.4	0.27	0.14	0	0	0	0	0	0.26	0	0	Agrp	agouti related protein,agouti related protein,
11605	1.06	1.03	2.82	0.65	1.49	1	0.96	0.65	0.69	0.79	1.1	0.96	7.57	9.16	9.27	6.67	9.43	1.22	1.75	0.75	Gla	alpha-galactosidase A
11606	3.63	3.96	4.44	3.84	3.3	2.69	3.3	6.51	4.72	2.65	3.35	2.21	4.15	4.75	2.64	4.49	3.56	7.01	6.11	5.02	Agt	angiotensinogen
11607	15.11	16.05	14.94	11.25	11.85	9.01	9.44	9.68	11.65	5.81	9.13	7.89	5.17	6.05	6.94	6.74	6.25	17.02	17.7	15.68	Agtr1a	angiotensin II receptor, type 1a
11608	0.3	0.33	0.35	0	0.03	0.03	0	0.09	0.27	0.22	0.22	0.22	0.4	0.05	0.09	0	0.28	0.18	0.16	0.04	Agtr1b	angiotensin II receptor, type 1b
11609	0.03	0	0	0	0.02	0.03	0	0	0	0	0	0	0	0	0.11	0	0	0	0	0	Agtr2	angiotensin II receptor, type 2
11610	12.1	17.71	12.02	10.69	13.3	5.56	5.48	15.38	13.76	15.23	18	10.9	24.21	13.72	11.74	13.58	19.67	16.15	19.2	20.74	Agtrap	angiotensin II receptor-associated protein
11611	0	0	0	0	0	0	0	0	0	0	0	0	0.04	0.06	0	0	0.02	0	0	0	Agxt	alanine-glyoxylate aminotransferase
11622	0.98	1.61	1.65	1.6	1.13	1.44	1.45	1.16	0.85	1.07	1.06	1.05	2.04	2.56	1.41	1.47	1.97	1.39	1.44	1.27	Ahr	aryl-hydrocarbon receptor
11624	0.53	0.63	0.6	0.87	0.32	0.55	0.65	0.45	0.32	0.49	0.97	0.63	0.41	0.11	0.12	0.11	0.34	1.05	0.81	0.44	Ahrr	aryl-hydrocarbon receptor repressor,aryl-hydrocarbon receptor repressor,
11625	3.38	1.61	1.09	3.64	2.74	2.02	3.24	3.57	3.45	3.94	3.38	2.8	24.81	15.24	13.05	11.27	19.41	2.51	2.52	3.63	Ahsg	alpha-2-HS-glycoprotein
11629	3.53	2.15	1.9	2.46	5.68	0.91	1.4	2.9	2.32	0.71	0.64	1.91	5.11	5.1	18.49	3.96	6.35	2.62	2.22	1.29	Aif1	allograft inflammatory factor 1,allograft inflammatory factor 1,
11632	32.59	34.58	27.61	38.45	36.83	39.4	44.39	49.15	31.05	34.43	33.14	28.89	29.68	26.24	15.89	21.74	21.19	41.88	44.48	42.03	Aip	aryl-hydrocarbon receptor-interacting protein,aryl-hydrocarbon receptor-interacting protein,
11634	0	0	0	0	0.04	0.02	0.04	0	0	0	0	0.04	0.03	0	0	0	0.03	0.03	0	0.08	Aire	autoimmune regulator (autoimmune,autoimmune regulator (autoimmune,autoimmune regulator (autoimmune,autoimmune regulator (autoimmune,autoimmune regulator (autoimmune,autoimmune regulator (autoimmune,autoimmune regulator (autoimmune,autoimmune regulator (autoimmune,
11636	339.23	381.18	277.72	466.62	591.22	549.64	667.98	388.17	332.34	316.18	259.68	265.65	163.19	163.72	101.85	115.32	130.4	430.14	460.3	476.24	Ak1	adenylate kinase 1,adenylate kinase 1,adenylate kinase 1,
11637	28.05	24.52	24.22	28.16	40.93	42.95	40.16	31.6	21.92	19.52	14.29	22.38	38.28	42.2	30.49	29.58	32.05	34.12	36.88	36.52	Ak2	adenylate kinase 2 isoform b
11639	12.58	9.96	9.89	12.38	17.97	20.17	17.28	11.82	7.88	8.96	9.76	8.47	5.37	4.2	6.82	3.81	6.24	15.06	15.09	18.48	Ak3l1	adenylate kinase 3 alpha-like 1,adenylate kinase 3 alpha-like 1,adenylate kinase 3 alpha-like 1,
11640	52.97	57.24	51.67	50.11	55.57	39.1	41.38	53.6	47.63	42.94	34.16	38.11	16.63	15.68	12.37	13.2	15.25	59.32	62.69	67.02	Akap1	A-kinase anchor protein 1
11641	31.15	51.93	32.85	48.94	53.54	29.24	29.26	66.3	63.44	60.43	49.08	54.09	217.7	240.13	166.1	186.06	183.19	51.68	54.17	51.68	Akap2	A kinase (PRKA) anchor protein 2 isoform 1
11642	0.03	0	0	0	0	0	0	0	0	0	0	0	0	0	0	0	0	0	0	0	Akap3	A-kinase anchor protein 3
11647	13.24	12.58	15.05	16.6	22.02	21.9	18.14	20.68	14.36	14.2	10.37	12.76	20.58	19.82	12.86	14.56	16.69	20.67	20.58	17.52	Akp2	alkaline phosphatase 2, liver
11648	0.03	0.09	0.1	0.06	0.02	0.06	0.17	0.34	0.11	0.09	0.18	0.07	0.48	0.08	0	0.03	0.1	0.06	0.1	0.14	Akp3	alkaline phosphatase 3, intestine, not Mn
11650	0	0	0	0.06	0	0	0	0	0.16	0	0	0.07	0.03	0.04	0	0	0	0	0.04	0.04	Akp5	alkaline phosphatase 5,alkaline phosphatase 5,
11651	57.15	70.02	45.1	60.38	60.44	47.14	50.59	92.49	68.42	57.56	47.9	46.43	71.55	88.73	60.14	68.67	58.35	76.7	87.07	76.23	Akt1	thymoma viral proto-oncogene 1
11652	63.87	74.57	58.69	80.99	88.73	45.07	54.77	85.83	66.83	61.76	55.19	52.99	44.53	43.58	33.27	37.32	36.61	92.14	94.16	87.72	Akt2	thymoma viral proto-oncogene 2,thymoma viral proto-oncogene 2,thymoma viral proto-oncogene 2,
11655	85.18	101.56	74.24	66.08	77.75	51.14	51.38	107.63	63.98	59.9	55.88	55.08	45.12	47.55	29.92	46.23	34.7	78.53	88.7	78.09	Alas1	aminolevulinic acid synthase 1,aminolevulinic acid synthase 1,
11656	7.72	21.12	12.08	5.59	6.26	6.31	5.6	15.63	10.11	6.46	5.24	7.28	3.63	2.51	0.69	1.98	3.13	11.29	7.16	8.35	Alas2	aminolevulinic acid synthase 2, erythroid
11657	0	0	0	0	0	0	0	0	0	0	0.06	0	0.05	0	0	0	0.07	0	0	0	Alb	albumin
11658	0.36	1.23	0.5	0.53	1.4	0.86	0.74	0.25	0.65	0.47	0.13	0.43	4.49	4.79	6.01	5.39	7.02	0.37	0.34	0.33	Alcam	activated leukocyte cell adhesion molecule
11666	9.02	10.58	7.28	9.64	9.61	9.88	8.68	15.34	9.71	9.17	12.63	8.71	11.2	6.9	8.18	5.11	8.02	11.8	11.93	14.32	Abcd1	ATP-binding cassette, sub-family D, member 1,ATP-binding cassette, sub-family D, member 1,ATP-binding cassette, sub-family D, member 1,
11668	6.1	7.7	8.68	21.29	13.68	13.65	13.99	13.92	16.57	20.04	14.32	21.12	91.88	100.02	105.19	96.29	93.91	15.31	17.8	16.62	Aldh1a1	aldehyde dehydrogenase family 1, subfamily A1
11669	119.31	93.21	92.63	151.6	191.97	103.19	131.96	204.69	129.21	145.53	119.62	109.96	69.8	79.55	50.4	53.01	57.21	162.63	177.69	179.86	Aldh2	aldehyde dehydrogenase 2, mitochondrial,aldehyde dehydrogenase 2, mitochondrial,
11670	0.12	0.23	0.51	0.89	1.28	0.91	1.3	1.67	1.97	1.29	0.94	0.53	1.71	0.19	0.54	0.82	1.03	2.4	1.94	1.79	Aldh3a1	aldehyde dehydrogenase family 3, subfamily A1,aldehyde dehydrogenase family 3, subfamily A1,
116701	6.87	6.63	5.5	8.63	7.01	4.56	4.34	8.67	7.28	7.29	6.62	5.38	4.61	6.93	3.13	4.37	4.46	10.8	11.2	12.1	Fgfrl1	fibroblast growth factor receptor-like 1
11671	7.92	10.63	7.02	9.93	8.95	10.04	9.16	10.58	9.71	10.31	6.64	9.18	10.69	10.06	11.11	8.88	10.5	11.4	12.19	8.82	Aldh3a2	aldehyde dehydrogenase family 3, subfamily A2
116731	0.08	0.19	0.08	0.01	0.23	0.01	0.07	0.03	0.05	0	0	0.06	0.04	0.04	0.02	0.01	0.07	0.06	0.05	0.05	Pcdha1	protocadherin alpha 1,protocadherin alpha 1,
116732	0.11	0	0	0	0	0	0	0	0	0	0	0	0.06	0	0.1	0	0.03	0	0	0	Tsga13	testis specific gene A13
116733	28.28	27.42	25.51	29.11	31.36	40.38	33.17	27.27	27.38	29.81	23.98	25.99	28.13	32.6	27.77	30.64	29.4	27	27.74	25.49	Vps4a	vacuolar protein sorting 4a
11674	1682.55	1501.57	1376.51	1430.19	1389.16	1400.91	1217.04	1707.38	1538.29	1468.57	1326.23	1261.24	1053.93	944.3	713.78	757.15	824.04	1859.47	1800.97	1952.88	Aldoa	aldolase 1, A isoform,aldolase 1, A isoform,
116748	4.68	7.84	8.33	14.84	6.77	7.21	5.92	12.96	5.09	6.06	11.38	7.91	6.53	3.87	5.65	4.05	5.39	16.66	10.85	16.44	Lsm10	U7 snRNP-specific Sm-like protein LSM10
11676	0.16	0.14	0	0.03	0.19	0	0.06	0.16	0.12	0.57	0	0.1	0.6	0.73	0.51	0.52	0.71	0.09	0.2	0.11	Aldoc	aldolase 3, C isoform,aldolase 3, C isoform,
11677	224.91	234.57	187.8	187.39	209.57	153.89	147.84	221.81	147.27	137.06	149.15	135.81	290.11	164.16	173.65	197.6	252.34	219.46	236.71	232.57	Akr1b3	aldo-keto reductase family 1, member B3 (aldose
11682	0.03	0	0	0.02	0.03	0	0.01	0.02	0	0.01	0	0.01	0.05	0.01	0	0.02	0.05	0.01	0	0	Alk	anaplastic lymphoma kinase
116837	0	0	0	0.02	0.01	0	0.01	0	0	0	0	0	0	0	0	0	0	0	0	0.02	Rims1	regulating synaptic membrane exocytosis 1
116838	0.01	0.03	0.05	0.08	0.06	0.03	0.01	0	0.08	0	0	0.02	0.06	0.08	0.08	0.01	0.06	0.01	0	0.04	Rims2	regulating synaptic membrane exocytosis 2,regulating synaptic membrane exocytosis 2,regulating synaptic membrane exocytosis 2,
11684	1.42	1.63	0.95	1.07	1.71	1.36	1.84	2.24	1.67	1.19	1.52	1.19	0.85	0.63	0.41	0.57	0.77	2.5	1.97	2.82	Alox12	arachidonate 12-lipoxygenase,arachidonate 12-lipoxygenase,
116847	14.5	20.9	18.93	16.5	20.38	12.46	14.33	26.59	15.66	17.46	19.52	15.64	27.33	14.08	13.4	9.64	21.73	23.51	27.25	23.25	Prelp	proline arginine-rich end leucine-rich repeat
116848	4.82	7.79	5.72	7.36	7.75	7.1	7.48	12.32	11.38	10.04	10.34	11.06	10.52	12.6	10.18	10.47	9.37	10.49	9.64	10.51	Baz2a	bromodomain adjacent to zinc finger domain, 2A,bromodomain adjacent to zinc finger domain, 2A,bromodomain adjacent to zinc finger domain, 2A,bromodomain adjacent to zinc finger domain, 2A,bromodomain adjacent to zinc finger domain, 2A,bromodomain adjacent to zinc finger domain, 2A,
11685	0	0	0	0.08	0.04	0	0.08	0.21	0.06	0.19	0.1	0.08	0.07	0	0	0	0.1	0	0	0.09	Alox12e	arachidonate lipoxygenase, epidermal
11686	0	0	0	0	0	0	0	0	0	0	0	0.03	0	0.13	0	0	0	0	0	0	Alox12b	arachidonate 12-lipoxygenase, 12R type
11687	0	0	0.04	0.02	0	0	0	0	0	0	0	0	0	0	0.06	0	0	0.03	0.03	0	Alox15	arachidonate 15-lipoxygenase
116870	17.21	20.69	14.84	17.63	16.73	15.65	16.41	25.19	19.53	17.31	14.61	13.47	17.77	23.59	12.41	20.79	15.95	23.92	26.29	29.53	Mta1	metastasis associated 1,metastasis associated 1,metastasis associated 1,
116871	5.06	5.4	5.97	6.64	7	2.43	3.02	8.38	5.09	6.28	4.5	5.33	9	8.4	8.43	6.63	7.09	6.85	8.42	7.9	Mta3	metastasis associated 3,metastasis associated 3,metastasis associated 3,metastasis associated 3,
116872	0	0.07	0	0	0	0.15	0	0.1	0	0	0	0	0	0	0	0	0	0.17	0	0	Serpinb7	serine (or cysteine) proteinase inhibitor, clade
116873	3.81	4.93	3.83	5.6	4.66	3.91	3.8	8.08	5.4	6.59	5.86	7.42	6.61	10.57	7.71	8.99	6.2	6.28	6.62	6.29	Stim2	stromal interaction molecule 2,stromal interaction molecule 2,stromal interaction molecule 2,
11688	0.14	0.11	0.18	0.08	0.03	0.11	0.07	0.03	0	0.04	0	0	0	0	0	0.13	0	0.1	0.08	0.03	Alox8	arachidonate 8-lipoxygenase,arachidonate 8-lipoxygenase,
11689	2.14	2.77	1.77	2.48	2.44	1.8	2.6	2.5	1.91	2.37	1.79	2.13	6.39	6.74	6.55	5.47	4.86	1.89	3.31	3.58	Alox5	arachidonate 5-lipoxygenase
116891	13.43	11.28	11.26	13.12	19	17.26	15.54	17.21	18.29	15.71	14.04	17.42	23.26	20.11	14.53	16.53	22.73	13.94	13.68	10.9	Derl2	Der1-like domain family, member 2,Der1-like domain family, member 2,
11690	1.74	5.24	2.69	4.48	9.04	7.92	7.96	5.83	3.49	1.3	2.99	1.9	51.79	40.79	43.62	47.52	43.34	4.11	3.88	6.66	Alox5ap	arachidonate 5-lipoxygenase activating protein
116904	28.01	42.06	31.44	50.64	52.22	49.49	48.21	38.77	35.59	35.51	30.73	30.98	21.27	23.02	20.99	15.92	17.32	50.91	49.62	51.75	Alpk3	myocyte induction differentiation originator
116914	1.81	2.04	1.27	1.72	1.82	1.7	2.05	7.07	4.7	5.57	4.7	4.84	2.15	3.52	1.56	2.04	1.99	2.83	1.78	2.97	Slc19a2	solute carrier family 19 (thiamine transporter),,solute carrier family 19 (thiamine transporter),,
11692	6.81	4.02	5.84	9.16	9.8	3.66	3.69	34.22	24.37	27.4	27.36	19.47	6.76	8.8	2.34	7.31	5.07	6.65	9.48	11.71	Gfer	growth factor, erv1 (S. cerevisiae)-like
116939	1.2	1.46	0.81	0.45	0.53	0.7	0.7	0.76	0.43	0.4	0.13	0.5	0.67	0.85	0.47	0	0.26	0.6	1.24	0.57	Pnpla3	adiponutrin
11694	0	0	0	0	0	0	0	0.15	0.27	0.13	0.17	0.16	0	0	0	0	0	0	0	0	Alx3	aristaless 3
116940	3.54	3.54	3.77	5.3	4.1	6.26	5.23	4.4	6.47	9.03	6.65	9.63	3.94	4.84	5.49	5.51	5.18	2.44	2.12	2.12	Tgs1	nuclear receptor coactivator 6 interacting
11695	0.75	0.28	0.17	0.23	0.12	0.34	0.11	0.33	0.49	0.06	0.18	0.1	0.2	0.14	0	0	0.14	0.32	0.24	0.38	Alx4	aristaless 4
116972	1.81	2.04	0.88	1.15	1.25	1.71	1.55	2.29	2.29	0.87	1.75	1.78	4.05	2.58	1.72	2.26	5.23	1.76	1.74	2.78	2310047D13Rik	whn-dependent transcript 3
11699	0	0	0	0	0	0	0	0	0	0	0	0	0.2	0	0	0	0.08	0	0	0	Ambp	alpha 1 microglobulin/bikunin
11702	49.46	47.39	50.59	98.46	63.22	50.84	53.68	54.24	71.49	83.38	63.4	102.54	20.69	21.96	32.82	28.65	28.07	64.01	62.17	45.08	n/a	n/a
11704	0.29	0	0	0.11	0.06	0.12	0	0.3	0	0.13	0	0.14	0	0	0	0	0	0.09	0.19	0	Amelx	amelogenin X chromosome,amelogenin X chromosome,
11705	0.17	0.04	0.19	0.43	0.72	0.52	0.59	6.43	3.1	4	4.32	2.32	0.16	1.27	0	0.65	0.09	0.23	0.22	0.3	Amh	anti-Mullerian hormone
117109	18.14	14.14	15.9	14.92	19.62	13.53	15.12	31.31	21.58	24.63	21.06	21.64	13.95	15.21	5.81	15.14	14.91	20.42	18.92	18.26	Pop5	processing of precursor 5, ribonuclease P/MRP,processing of precursor 5, ribonuclease P/MRP,
117146	21.36	27.31	23.87	30.25	28.02	16.39	19.56	33.52	27.77	27.91	25.57	25.34	23.13	23.46	18.57	15.13	18.82	38.9	41.49	42.36	Ube3b	ubiquitin protein ligase E3B
117149	2.06	1.19	2.38	3.01	2.02	0.87	1.07	4.86	4.53	1.46	2.56	2.13	3.32	3.75	1.95	4.68	2.74	4.32	5.11	4.18	Tirap	Toll-interleukin 1 receptor domain-containing,Toll-interleukin 1 receptor domain-containing,Toll-interleukin 1 receptor domain-containing,
117150	13.83	16.02	13.37	19.09	21.3	16.51	15.55	23.2	16.8	16.36	14.06	16.23	14.03	15.53	7.98	11.95	10.64	18.15	20.87	22.75	Pip4k2c	phosphatidylinositol-5-phosphate 4-kinase, type,phosphatidylinositol-5-phosphate 4-kinase, type,
117160	1.21	1.89	1.06	1.56	2.13	1.45	1.09	3.67	2.38	1.83	1.01	1.5	4	2.24	5.08	2.93	3.31	2.58	2.44	2.03	Ttyh2	tweety 2
117167	7.34	10.11	8.04	6.52	8.2	5.35	5.16	11.52	9.57	9.09	9.96	9.87	16.43	21.73	12.42	24.19	17.05	8.86	8.54	7.74	Steap4	STEAP family member 4
11717	8.69	13.92	8.98	10.74	14.13	8.32	9.02	10.56	12.12	8.72	9.53	7.79	27.31	25.88	16.27	16	25.1	15.62	13.89	13.2	Ampd3	AMP deaminase 3,AMP deaminase 3,AMP deaminase 3,
117171	10.88	5.77	9.92	9.24	14.06	10.25	8.94	13.91	10.32	10.79	6.56	7.83	10.7	11.46	7.82	10.83	7.8	10.96	14.7	11.68	1110038F14Rik	hypothetical protein LOC117171
117197	4.32	1.14	2.32	4.36	6.32	1.67	1.85	11.97	5.39	8.02	4.75	4.54	5.71	4.87	1.06	1.89	4.38	6.07	9.45	10.21	Cno	cappuccino
117198	225.35	184.82	282.89	305.9	141.75	117.99	103.78	81.48	214.54	187.45	180.94	217.47	150.94	132.84	226.71	115.16	196.72	175.83	148.09	163.49	Ivns1abp	influenza virus NS1A binding protein isoform 2
11720	0	0	0	0	0	0	0.03	0	0	0	0	0	0.04	0	0	0	0	0	0	0	Mat1a	methionine adenosyltransferase I, alpha
11722	8.77	4.22	7.67	12.09	7.02	12.68	9.29	3.73	6.49	5.76	7.16	8.38	2.16	4.15	0.8	2.64	2.85	7.83	9.13	6	Amy1	amylase 1, salivary,amylase 1, salivary,
11727	0.87	0.58	0.38	0.85	0.32	0.89	0.51	1.43	1.05	1.44	0.96	0.93	1.72	0.12	3.66	0.48	1.98	1.59	0.52	1.34	Ang	angiogenin, ribonuclease, RNase A family, 5,angiogenin, ribonuclease, RNase A family, 5,
11731	0	0	0	0	0	0	0	0	0	0	0.1	0	0.17	0	0	0.29	0.46	0	0	0	Ang2	angiogenin, ribonuclease A family, member 2
11732	50.01	59.77	50.58	68.2	58.56	42.83	41.62	66.59	59.06	55.12	41.53	44.05	42.58	40.73	29.18	27.43	35.42	76.96	83.08	80	Ank	ank protein,ank protein,
11733	15.71	18.14	12.26	20.03	20.54	27.23	29.31	11.75	9.87	8.8	9.36	6.75	3.52	2.98	2.4	2.92	2.7	14.98	16.1	15.64	Ank1	ankyrin 1, erythroid,ankyrin 1, erythroid,ankyrin 1, erythroid,ankyrin 1, erythroid,ankyrin 1, erythroid,ankyrin 1, erythroid,
11735	11.72	19.2	12.55	19.17	18.68	11.83	15.2	14.23	14.43	12.78	10.38	12.39	15.04	15.51	16.77	13.24	14.28	18.95	19.51	19.03	Ank3	ankyrin 3, epithelial isoform a
11736	2.67	5.63	4.67	5.12	4.26	3.99	4.28	5.71	6.71	6.09	4.88	6.2	8.32	8.85	8.47	8.6	9.56	5.3	4.2	4.47	Ankfy1	ankyrin repeat and FYVE domain containing 1
11737	114.25	107.71	98.16	132.29	155.19	177.69	215.63	79.78	89.4	88.8	69.65	88.12	92.8	96.71	86.22	78.14	95.71	92.63	96.42	87.78	Anp32a	acidic (leucine-rich) nuclear phosphoprotein 32
11739	3477.36	2873.07	2628.17	3200.47	3238.71	3100.67	2906.41	2781.46	2239.71	2035.46	1875.2	1816.99	1239.96	1165.91	905.13	1107.57	1056.65	3269.34	3479.07	3493.49	Slc25a4	solute carrier family 25 (mitochondrial carrier,,solute carrier family 25 (mitochondrial carrier,,
11740	198.87	203.85	185.87	195.17	173.33	120.57	132.62	136.7	129.33	107.21	108.98	97.06	262.58	226.81	237.08	251.67	250.15	193.85	184.9	186.31	Slc25a5	solute carrier family 25, member 5
11744	40.64	44.95	37.31	52.51	50.53	33.63	46.06	58.93	45.64	43.58	30.48	43.16	36.77	48.63	29.92	24.19	29.84	70.25	81.77	77.66	Anxa11	annexin A11
11745	12.05	14.56	7.68	14.35	11.33	9.68	9.85	15.14	13.12	10.42	12.14	14.46	35.54	34.36	39.44	43.22	40.29	13.28	11.07	13.06	Anxa3	annexin A3,annexin A3,
11746	12.27	12.52	10.97	19.63	15.94	19.61	17.04	14.52	15.6	16.08	10.1	13.24	65.09	58.19	60.11	50.18	63.99	16.17	16.39	15.82	Anxa4	annexin A4,annexin A4,annexin A4,annexin A4,
11747	81.82	70.96	67.25	86.62	84.54	100.94	84.6	88.68	98.21	109.83	75.4	116.52	134	85.24	141.57	87.51	130.59	64.56	60.37	59.97	Anxa5	annexin A5
11749	71.8	79.48	59.41	85.24	87.24	65.07	56.65	89.08	64.71	69.75	63.48	67.21	130.95	126.59	95.88	103.77	115	97.57	103.56	92.89	Anxa6	annexin A6,annexin A6,annexin A6,
11750	26.82	28.64	21.79	34.18	23.22	20.88	19.33	32.78	35.79	36.07	38.59	39.31	76.61	94.18	82.07	82.7	75.14	30.61	31.93	34.64	Anxa7	annexin A7,annexin A7,annexin A7,annexin A7,
11752	0.22	0	0	0.13	0.09	0.29	0.12	0.08	0	0	0.4	0.07	1.38	1.55	0.56	0.54	0.85	0.13	0.22	0.31	Anxa8	annexin A8
11754	3.25	4.7	4.17	4.34	3.43	3.46	3.69	5.37	5.36	3.27	4.24	3.6	7.85	6.2	4.67	3.78	6.25	6.31	5.89	5.24	Aoc3	amine oxidase, copper containing 3,amine oxidase, copper containing 3,
11757	171.15	156.64	168.12	204	154.81	131.97	135.63	195.62	183.65	187.54	181.03	208.48	88.06	87.65	87.63	100.04	88.26	204.96	194.74	189.51	Prdx3	peroxiredoxin 3
11758	110.64	101.09	105.08	93.18	69.57	28.41	45.16	173.74	122.92	147.98	186.8	154.6	121.71	119.3	85.52	134.23	113.48	125.84	125.22	137.84	Prdx6	peroxiredoxin 6
117586	0.15	0.04	0.17	0.19	0.16	0.04	0.05	0.1	0.07	0.09	0.09	0.16	0	0	0	0	0	0.12	0.29	0.17	A1bg	alpha-1-B glycoprotein
117590	35.2	36.01	29.61	41.7	36.76	31.75	34.59	45.73	31.88	35.02	34.97	24.8	7.97	6.36	4.92	4.63	6.6	55.82	63.52	67.58	Asb10	ankyrin repeat and SOCS box-containing protein
117591	0.18	1.05	0.63	0.36	0.5	0.41	0.18	1.09	1.54	1.43	1.7	0.85	1.72	0.56	2.06	0.65	1.3	0.38	0.42	0.15	Slc2a9	solute carrier family 2, member 9 isoform 3
117592	0.95	1.42	0.89	2.16	1.71	1.23	0.7	2.58	1.9	1.04	0.58	0.77	1.25	1.69	0.47	1.93	0.79	2.43	3.09	3.96	B3galt6	UDP-Gal:betaGal beta 1,3-galactosyltransferase,
117599	2.29	4.35	2.12	3.28	2.96	2.21	2.17	2.36	1.69	2.17	2.03	2.01	3.06	4.63	3.32	4.36	3.13	3.46	3.34	3.56	Helb	helicase (DNA) B
117600	0.32	0.82	0.41	0.59	0.62	0.31	0.56	0.83	0.4	0.83	0.19	0.48	0.92	1.77	0.58	0.53	0.91	0.57	0.7	1.14	Srgap1	SLIT-ROBO Rho GTPase activating protein 1,SLIT-ROBO Rho GTPase activating protein 1,SLIT-ROBO Rho GTPase activating protein 1,
117606	1.03	1.36	1.28	1.26	1.12	0.96	1.28	2.27	1.54	1.67	1.1	1.49	3.09	3.18	2.68	2.86	2.08	2.27	2.28	2.3	Boc	brother of CDO,brother of CDO,brother of CDO,
11761	6.88	6.9	6.78	11.36	7.42	15.68	13.03	5.22	6.44	7.04	5.36	7.19	4.58	5.21	4.36	5.22	5	11.09	9.3	10.36	Aox1	aldehyde oxidase 1
11764	28.16	35.34	26.35	30.37	31.75	26.86	23.72	51.83	37.64	40.51	41.15	38.76	45.6	43.15	35.52	40.41	40.57	34.77	39.82	38.3	Ap1b1	adaptor protein complex AP-1, beta 1 subunit,adaptor protein complex AP-1, beta 1 subunit,adaptor protein complex AP-1, beta 1 subunit,
11765	7.6	8.46	9.34	13.36	12.77	10.74	12.15	12.73	11.77	14.18	9.87	15.37	13.95	16.76	16.7	17.56	15.9	11.01	10.78	10.53	Ap1g1	adaptor protein complex AP-1, gamma 1 subunit
11766	2.78	2.8	3.07	3.16	3.05	1.42	2.08	3.39	2.1	2.43	3	2.04	4.54	4.4	3.52	4.27	3.93	4.06	4.52	4.64	Ap1g2	adaptor protein complex AP-1, gamma 2 subunit,adaptor protein complex AP-1, gamma 2 subunit,
11767	23.23	21.43	23.19	20.34	18.59	15.48	14.94	24.75	20.76	17.74	16.61	18.34	38.44	30.98	27.3	28.79	35.32	24.51	28.5	24.18	Ap1m1	adaptor-related protein complex AP-1, mu subunit
11768	0	0	0.04	0	0	0	0.03	0	0	0	0	0	0.04	0	0	0	0.02	0	0	0	Ap1m2	adaptor protein complex AP-1, mu 2 subunit,adaptor protein complex AP-1, mu 2 subunit,
11769	14.23	15.17	15.09	22.54	20.96	33.58	40.4	19.98	9.61	8.49	10.57	7.54	31.73	28.45	26.31	17.95	33.63	26.8	22.32	21.57	Ap1s1	adaptor protein complex AP-1, sigma 1
11770	597.76	572.86	509.1	829.65	709.79	544.53	499.03	627.14	529.84	567.54	489.41	606.56	814.26	748.39	543.22	724.53	774.14	760.3	625.5	780.92	Fabp4	fatty acid binding protein 4, adipocyte
11771	15.15	21.9	16.8	27.04	28.52	15.56	17.19	34.16	22.88	21.84	21.87	18.75	29.78	31.3	21.1	25.52	24.6	29.71	32.43	33.08	Ap2a1	adaptor protein complex AP-2, alpha 1 subunit
11772	14.84	22.45	14.62	20.84	23.85	14.27	12.29	24.67	20.36	20.52	19.21	18.76	40.03	42.41	37.12	33.73	36.26	26.4	32.26	28.02	Ap2a2	adaptor protein complex AP-2, alpha 2 subunit
11773	79.02	88.87	59.97	74.96	73.65	85.82	80.2	113.09	75.64	76.63	74.7	75.17	155.24	137.15	125.41	131.11	132.73	93.12	101.45	94.45	Ap2m1	adaptor protein complex AP-2, mu1
11774	9.73	9.03	8.87	12.3	18.1	11.39	14.48	10.37	11.28	9.29	7.89	10.75	13.08	14.89	14.24	11.04	12.19	12	12.52	12.5	Ap3b1	adaptor-related protein complex 3, beta 1
11775	0.01	0	0	0.03	0	0.01	0.01	0	0.08	0	0	0	0.06	0.02	0	0.1	0.02	0	0.02	0	Ap3b2	adaptor-related protein complex 3, beta 2,adaptor-related protein complex 3, beta 2,adaptor-related protein complex 3, beta 2,
11776	18.73	21	17.21	21.73	23.66	15.55	14.48	23.63	20.38	20.01	15.33	17.76	31.29	27.62	23.23	22.92	24.94	21.91	24.07	23.52	Ap3d1	adaptor-related protein complex 3, delta 1
11777	11.06	10.8	13.13	20.79	16.45	27.99	21.44	8.08	13.45	15.71	23.04	21.59	27.47	35.58	50.42	34	41.29	5.46	5.82	3.51	Ap3s1	adaptor-related protein complex 3, sigma 1
11778	12.01	10.96	10.06	16.45	14.49	13.7	13.74	8.55	7.49	8.09	6.57	6.8	14.52	8.96	11.02	8.32	14.15	15.47	12.09	14.4	Ap3s2	adaptor-related protein complex 3, sigma 2
11781	3.09	3.6	4.12	3.44	4.11	3.93	4.41	4.93	4	2.24	3.24	2.48	4.24	3.86	3.9	4.83	3.54	4.29	4.19	3.87	Ap4m1	adaptor-related protein complex AP-4, mu 1
11782	40.92	29.22	30.92	47.36	29.39	32.88	29.46	16.55	31.19	32.5	21.24	35.32	18.6	22.15	29.07	21.46	21.48	24.05	27.82	19.41	Ap4s1	adaptor-related protein complex AP-4, sigma 1
11783	0.57	1.23	1.06	1.24	1.36	1.02	1.16	3.16	2.84	4.2	3.37	4.08	4.61	6.31	4.87	6.57	4.98	1.09	1.11	1.14	Apaf1	apoptotic protease activating factor 1,apoptotic protease activating factor 1,
11784	0.12	0.03	0.05	0.23	0.07	0.11	0.06	0.14	0.13	0	0.15	0.1	0.06	0.16	0	0.08	0.03	0.12	0.27	0.05	Apba2	amyloid beta (A4) precursor protein-binding,
11785	26.83	19.68	22.58	21.93	23.07	19.16	21.67	22.33	18.38	16.5	14.2	14.09	15.35	12.53	9.05	10.46	12.31	27.42	30.52	30.61	Apbb1	amyloid beta (A4) precursor protein-binding,,amyloid beta (A4) precursor protein-binding,,amyloid beta (A4) precursor protein-binding,,
11787	5.85	11.16	7.35	11.49	9.3	9.29	10.47	10.4	8.29	8.15	7.07	7.94	8.21	10.91	6.03	6.07	7.21	9.04	9.64	11.56	Apbb2	amyloid beta (A4) precursor protein-binding,,amyloid beta (A4) precursor protein-binding,,amyloid beta (A4) precursor protein-binding,,amyloid beta (A4) precursor protein-binding,,amyloid beta (A4) precursor protein-binding,,amyloid beta (A4) precursor protein-binding,,amyloid beta (A4) precursor protein-binding,,amyloid beta (A4) precursor protein-binding,,
11789	4.41	8.04	6.92	8.34	7.85	7.6	8.13	8.66	8.84	10.41	8.58	11.07	10.36	12.21	14.03	10.89	12.09	6.53	5.36	6.95	Apc	adenomatosis polyposis coli
11790	14.37	16.48	17.63	24.47	30	21.51	18.4	30.31	23.9	20.08	20.2	15.78	14.53	16.96	14.56	10.87	11.91	35.28	33.22	38.23	Speg	SPEG complex locus isoform 1
11792	12.78	15.6	12.73	10.21	15.66	13.3	13.84	21.39	13.16	17.91	15.72	16.36	18.81	20.66	15.43	24.52	20.48	14.97	16.27	15.71	Apex1	apurinic/apyrimidinic endonuclease 1
11793	7.22	8.39	9.39	10.83	5.38	9.12	8.77	5.46	6.88	10.52	5.92	9.58	11.64	15.53	13.56	16.99	12.88	7.1	7.07	6.25	Atg5	autophagy-related 5-like
11796	4.53	4.46	2.95	4.46	5.05	3.89	4.47	4.94	4.26	4.24	4.08	5.85	12.98	14.87	9.51	14.67	12.8	4.4	4	3.27	Birc3	baculoviral IAP repeat-containing 3,baculoviral IAP repeat-containing 3,baculoviral IAP repeat-containing 3,
11797	6.67	8.77	7.99	9.62	9.06	13.17	12.36	8.32	9.27	10.6	10.32	12.25	11.23	15.01	11.99	16.5	14.22	7.69	7.97	7.26	Birc2	baculoviral IAP repeat-containing 2
11798	4.31	7.09	6.54	8.64	9.02	10.12	11.56	4.97	9.43	8.35	9.96	9.81	7.08	11.11	8.54	9.75	9.44	8.25	6.11	4.22	Birc4	baculoviral IAP repeat-containing 4,baculoviral IAP repeat-containing 4,baculoviral IAP repeat-containing 4,
11799	0	1.16	0	0	0.17	0.55	0.6	3.22	0	0.77	0	0.56	2.98	3.62	3.91	2.31	2.48	0.25	0.28	0.6	Birc5	baculoviral IAP repeat-containing 5 isoform 3
11800	6.68	10.11	9.27	13.24	12.96	21.98	18.82	10.48	14.34	17.96	12.87	17.14	15.33	26.77	17.91	22.64	16.91	9.1	9.24	7.9	Api5	apoptosis inhibitor 5
11801	0.07	0	0	0.06	0	0.13	0	0.05	0.11	0.13	0	0.05	0.12	0	0	0.13	0.3	0	0	0	Cd5l	CD5 antigen-like
11803	0.88	0.68	0.47	0.57	0.98	0.52	0.58	1.25	0.75	0.59	0.76	0.88	1.48	0.9	1.73	0.56	0.98	0.46	1.09	1.3	Aplp1	amyloid precursor-like protein 1
11804	90.88	114.33	85.77	124.84	133.84	125.77	124.66	113.3	120.27	142.24	101.61	141.93	84.09	107.28	91.38	76.13	86.29	110.83	115.87	116.14	Aplp2	amyloid beta (A4) precursor-like protein 2
11806	0.18	0.17	0	0.14	0.11	0.44	0.43	0.58	0	0.5	0.06	0.48	0.1	0	0	0.22	0.03	0	0.12	0.07	Apoa1	apolipoprotein A-I
11807	0	0	0	0	0	0.14	0.11	0	0	0	0	0	0.34	0	0	0	0.28	0.18	0	0	Apoa2	apolipoprotein A-II
11808	0	0.11	0	0	0	0	0	0	0	0	0	0	0	0	0	0	0	0	0	0	Apoa4	apolipoprotein A-IV
11810	1.3	1.94	0.97	1.64	1.95	1.13	1.18	2.78	1.75	1.28	1.15	1.2	12.8	7.17	20.22	7.94	14.71	0.9	0.62	0.92	Apobec1	apolipoprotein B editing complex 1,apolipoprotein B editing complex 1,
11811	126.92	136.38	103.86	110.33	123.52	67.1	73.98	130.37	96.99	100.49	93.41	82.88	83.64	88.32	59.9	63.17	66.53	130.29	149.97	172.4	Apobec2	apolipoprotein B editing complex 2
11812	0	0	0.38	0.46	0.16	0.34	0.42	0.55	0	0	0	0.13	1.92	1.23	2.73	0.95	1.86	0.46	0.26	0	Apoc1	apolipoprotein C-I,apolipoprotein C-I,
11813	0	0	0.98	0.13	0.14	0.15	0	0	0	0	0.41	0	8.61	6.58	4.68	8.39	6.66	0	0	0.24	Apoc2	apolipoprotein C-II,apolipoprotein C-II,
11815	10.68	8.94	5.46	15.05	8.42	7.66	7.92	8.43	5.71	14.39	8.39	11.98	44.06	67.92	34.49	68.28	50.23	9.8	8.23	12.04	Apod	apolipoprotein D,apolipoprotein D,apolipoprotein D,
11816	199.7	92.15	124.73	212.57	219.65	109.8	153.84	266.23	171.44	198.47	176.9	145.66	952.03	685.03	728.53	489.57	700.59	183.02	214.2	280.82	Apoe	apolipoprotein E
11818	0	0	0	0.1	0.17	0	0.12	0.12	0.37	0	0.1	0.08	0.14	0.2	0	0.46	0.27	0.1	0.11	0.18	Apoh	apolipoprotein H
11819	4.31	4.61	6.54	5.39	5.22	4	4.68	10.97	7.73	4.81	5.19	4.8	9.73	8.69	4.67	5.59	5.64	7.39	8.75	8.54	Nr2f2	nuclear receptor subfamily 2, group F, member 2
11820	90.15	106.13	73.79	122.33	146.33	72.22	101.7	148.41	112.76	118.27	110.07	101.42	230.14	241.01	156.9	166	194.29	125.82	132.5	130.92	App	amyloid beta (A4) precursor protein,amyloid beta (A4) precursor protein,amyloid beta (A4) precursor protein,amyloid beta (A4) precursor protein,amyloid beta (A4) precursor protein,
11821	13.35	9.97	7.48	11.12	13.06	5.12	8.58	19.45	7.31	9.43	9.28	8.34	31.62	25.96	16.43	19.45	24	15.84	17.55	18.23	Aprt	adenine phosphoribosyl transferase
11826	53.8	45.11	61.11	99.05	66.29	76.17	89.96	161.71	87.58	105.85	108.72	83.35	35.41	24.36	16.9	18.25	25.88	118.1	152.89	124.23	Aqp1	aquaporin 1
11827	0	0	0	0	0.04	0	0.07	0	0	0.17	0	0	0.05	0	0	0	0.06	0	0	0.07	Aqp2	aquaporin 2
11828	0	0	0	0	0	0	0	0	0	0	0	0	0.05	0.07	0	0	0.03	0.06	0	0	Aqp3	aquaporin 3
11829	1.4	1.46	1.58	1.88	0.77	1.28	1.36	1.05	1.53	1.45	1.5	1.3	0.22	0.5	0.04	0.14	0.56	1.55	1.61	1.86	Aqp4	aquaporin 4,aquaporin 4,aquaporin 4,aquaporin 4,
11832	12.5	14.77	11.14	12.06	6.85	8.88	8.84	12.15	8.47	12.03	7.35	10.13	1.33	1.28	0.76	0.77	1.86	13.39	11.75	12.31	Aqp7	aquaporin 7,aquaporin 7,
11833	3.72	1.21	2.48	0.83	1.48	1.58	1.94	1.83	1.1	1.8	1.1	2.23	0.45	0	0	0.2	0.14	1.46	3.02	2.8	Aqp8	aquaporin 8
11834	4.29	6.53	6.21	6.79	6.35	4.81	4.85	6.75	7.09	6.7	6.38	7.26	5.79	8.15	5.9	6.85	6.48	6.92	7.32	6.34	Aqr	aquarius,aquarius,
11835	0.61	0.51	0.6	0.66	0.48	0.4	0.56	0.82	0.78	0.31	0.47	0.22	0.97	0.86	0.46	0.5	0.77	0.65	0.58	0.58	Ar	androgen receptor
11836	45.65	42.12	33.65	47.3	43.9	72.19	63.58	50.44	40.67	32.93	33.54	33.89	32.46	24.56	23.28	20.92	22.91	51.45	53.97	62	Araf	v-raf murine sarcoma 3611 viral oncogene,v-raf murine sarcoma 3611 viral oncogene,v-raf murine sarcoma 3611 viral oncogene,
11837	576.38	561.8	433.17	583.95	514.32	201.84	194.97	934.8	622.25	577.47	577.32	519.94	955.59	884.43	552.33	755.06	787.78	616.54	689.75	697.57	Arbp	acidic ribosomal phosphoprotein P0
11838	0.69	0.81	0.46	0.72	1.49	0.57	0.57	2.14	0.9	0.95	0.81	0.9	1.41	0.78	0.74	0.77	0.99	0.46	1.15	1.56	Arc	activity regulated cytoskeletal-associated,activity regulated cytoskeletal-associated,
11839	0.11	0	0.05	0	0	0	0	0	0	0	0.27	0	0.48	0.26	0.15	0.14	0.65	0	0.15	0	Areg	amphiregulin preproprotein
11840	141.52	152.6	112.19	204.88	206.44	138.8	170.17	248.36	190.45	244.07	198.33	203.01	269.4	331.47	182.67	230.77	216.66	161.27	173.09	176.41	Arf1	ADP-ribosylation factor 1,ADP-ribosylation factor 1,ADP-ribosylation factor 1,
11841	8.02	10.61	6.4	11.99	13	20.12	14.27	13.6	12.91	12.68	14.33	13.42	22.69	28.68	20.48	25.63	20.01	8.34	9.13	6.32	Arf2	ADP-ribosylation factor 2,ADP-ribosylation factor 2,
11842	11	18.07	9.67	18.38	25.81	20.19	24.06	19.92	14.65	14.11	16.34	9.8	28.58	22.67	29.2	18.86	20.24	18.06	15.49	15.63	Arf3	ADP-ribosylation factor 3
11843	32.76	27.63	35.1	32.55	26.17	23.2	27.63	39.28	37.42	40.65	31.33	48.91	64.38	60.06	98.47	72.37	74.89	29.48	33.15	24.87	Arf4	ADP-ribosylation factor 4
11844	56.52	54.56	41.88	54.92	50.23	30.1	38	63.16	47.21	56.98	53.46	48.59	76.76	66.19	54.64	70.4	71.66	46.53	67.8	75.57	Arf5	ADP-ribosylation factor 5
118445	0.98	0.09	1.53	0.93	1.35	0.32	0.56	4.12	1.79	1.26	0.91	0.97	1.82	1.67	0.86	0.79	1.03	2.19	2.85	2.1	Klf16	Kruppel-like factor 16
118446	0.39	0.08	0	0.4	0	0.04	0.28	0	0.13	0	0	0.2	0	0.07	0.08	0	0.03	0.1	0.06	0.18	Gje1	gap junction membrane channel protein epsilon 1
11845	17.41	20.32	14.55	20.24	14.22	5.39	6.87	28.95	25.66	25.7	19.2	20.2	41.03	56.82	23.69	26.6	35.64	20.06	21.89	27.39	Arf6	ADP-ribosylation factor 6
118451	12.61	14.79	13.23	12.8	15.93	10.57	11.54	26.96	17.13	16.98	14.97	14.43	12.75	11.29	3.33	9.62	8.34	18.29	18.39	18.41	Mrps2	mitochondrial ribosomal protein S2,mitochondrial ribosomal protein S2,
118452	0.61	0.28	1.18	0	1.36	0.27	1.3	0.42	0.23	0.55	0	0.5	1.16	0.71	1.98	2.41	1.43	0.9	0.4	0.43	Baalc	brain and acute leukemia, cytoplasmic isoform
118453	0.69	0.76	1.69	0.56	0.58	0.46	0.57	1.38	1.4	1.06	0.74	0.51	1.35	0.82	0.64	0.2	0.82	1.31	1.77	1.1	Mmp28	matrix metalloproteinase 28 (epilysin) isoform
118454	0.84	0	0.02	0.38	0.22	0.19	0.34	0.65	0.18	0.54	0.03	0.05	0.38	0.27	0.5	0.15	0.36	0.67	0.42	0.42	Gja12	gap junction membrane channel protein alpha 12
11846	0	0	0	0.04	0.11	0	0.36	0.57	0.68	0.84	0.17	0.76	65.12	51.69	13.47	53.95	55.14	0.11	0	0.07	Arg1	arginase 1, liver
11847	0.24	0	0.16	0.03	0.03	0	0.06	0.28	0.06	0.22	0.35	0.51	0.18	0.25	0.38	0.3	0.41	0.19	0	0.29	Arg2	arginase type II
11848	123.28	183.65	103.12	165.92	149.58	82.39	88.41	162.25	135.1	137.55	117.33	160.18	209.61	227.03	184.47	200.42	204.76	166.09	159.37	155.22	Rhoa	ras homolog gene family, member A
11852	68.05	40.32	65.24	81.83	76.64	41.94	62.64	162.44	85.58	84.07	80.16	61.9	77.99	58.43	38.08	41.54	51.66	103.08	141.68	146.3	Rhob	ras homolog gene family, member B
11853	58.97	66.14	50.51	40.89	57.85	43.73	45.39	72.98	53.4	45.94	46.51	40.68	169.57	144.64	147.31	139.33	139.82	58.28	52.02	66.2	Rhoc	ras homolog gene family, member C
11854	2.72	4.83	2.9	2.32	2.15	0.91	3.08	5.4	3.3	3.79	4.4	3.07	5.14	3.04	1.54	3.38	4.66	2.3	5.09	4.23	Rhod	ras homolog D
11855	5.6	6.97	10.56	12.95	7.7	10.76	11.92	4.44	12.63	13.39	11.85	16.72	6.43	9.81	15.18	11.26	12.02	4.52	3.47	3.3	Arhgap5	Rho GTPase activating protein 5,Rho GTPase activating protein 5,
11856	0.8	0.95	1.33	1.31	1.49	1.56	1.16	1.13	0.92	1.24	0.66	1.27	2.27	2.29	0.8	1.03	1.77	1.71	0.81	1.22	Arhgap6	Rho GTPase activating protein 6 isoform a
11857	13.12	14.29	7.8	10.99	11.45	13.59	11.52	12.18	10.26	12.3	6.07	10.54	48.07	45.68	43.75	42.48	45.56	12.83	13.92	10.2	Arhgdib	Rho, GDP dissociation inhibitor (GDI) beta,Rho, GDP dissociation inhibitor (GDI) beta,
11858	3.45	3.2	2.55	2.91	2.75	4.08	3.48	3.04	1.48	2.05	1.45	2.1	3.47	3.91	1.97	2.66	4.37	2.22	1.96	2.56	Rnd2	Rho family GTPase 2,Rho family GTPase 2,
11859	0.17	0	0	0.2	0.17	0	0.03	0.3	0	0.31	0.05	0.11	0.42	0.14	0.08	0.32	0.15	0.2	0.4	0.06	Phox2a	paired-like homeobox 2a
11861	7.02	4.61	11.43	8.67	6.01	7.95	9.92	3.03	6.98	6.62	6.56	8.27	10.79	18.57	10.49	23.16	14.16	6.36	6.31	5.47	Arl4a	ADP-ribosylation factor-like 4
11863	8.68	12.84	8.59	14.24	14.51	14.35	13.98	25.15	22.22	25.43	20.7	25.05	16.58	23.95	18.07	18.81	14.19	15.48	16.76	16.57	Arnt	aryl hydrocarbon receptor nuclear translocator,aryl hydrocarbon receptor nuclear translocator,
11864	0.19	0	0.02	0.1	0.12	0.07	0.05	0.03	0	0.08	0.1	0	0.07	0.1	0	0	0.03	0.28	0.14	0.12	Arnt2	aryl hydrocarbon receptor nuclear translocator,aryl hydrocarbon receptor nuclear translocator,aryl hydrocarbon receptor nuclear translocator,
11865	8.67	8.6	8.24	1.09	2.12	1.51	1.38	3.18	1.61	2.93	1.82	2.7	6.27	4.59	5.04	5.27	5.98	0.43	0.92	0.85	Arntl	aryl hydrocarbon receptor nuclear,aryl hydrocarbon receptor nuclear,aryl hydrocarbon receptor nuclear,aryl hydrocarbon receptor nuclear,
11867	27.58	24.91	17.69	34.9	40.93	27.62	26.56	54.85	30.65	35.47	32.13	25.86	141.34	140.1	88.39	91.46	109.35	32.74	35.28	41.43	Arpc1b	actin related protein 2/3 complex, subunit 1B,actin related protein 2/3 complex, subunit 1B,actin related protein 2/3 complex, subunit 1B,
11870	73.13	44.26	60	94.59	83.32	54.33	60.46	101.87	77.29	76.97	84.33	59.4	24.1	27.25	14.22	17.08	20.18	124.31	142.07	160.03	Art1	ADP-ribosyltransferase 1,ADP-ribosyltransferase 1,
11871	0	0	0	0	0	0	0	0	0	0	0	0	0	0	0	0	0.12	0	0	0	Art2a	ADP-ribosyltransferase 2a
11872	0	0	0	0	0	0	0	0	0	0	0	0	0	0	0	0	0.02	0	0	0	Art2b	ADP-ribosyltransferase 2b
11875	8.9	5.15	6.01	7.88	4.45	3.57	3.73	6.97	6.56	4.6	5.29	3.92	2.89	3.2	1.3	1.12	1.83	9.02	8.94	9.83	Art5	ADP-ribosyltransferase 5 precursor,ADP-ribosyltransferase 5 precursor,
11876	0.11	0	0	0	0.04	0	0	0.08	0	0	0.14	0.07	0.12	0.09	0	0	0	0	0	0	Artn	artemin,artemin,artemin,
11877	5.45	4.22	4.94	6.66	6.52	3.6	4.12	18.91	11.27	11.32	12.33	8.7	4.65	4.3	2.35	4.37	3.66	7.25	7.44	9.65	Arvcf	armadillo repeat gene deleted in,armadillo repeat gene deleted in,armadillo repeat gene deleted in,armadillo repeat gene deleted in,armadillo repeat gene deleted in,armadillo repeat gene deleted in,armadillo repeat gene deleted in,armadillo repeat gene deleted in,
11878	0	0	0	0	0	0.02	0.01	0	0	0	0	0	0.02	0	0	0	0	0	0.03	0	Arx	aristaless related homeobox gene,aristaless related homeobox gene,
11881	2.75	3.56	2.73	2.81	3.93	1.82	2.62	5.34	2.99	2.88	2.52	2.31	6.4	4.47	3.74	2.31	5.24	2.92	4.43	3.63	Arsb	arylsulfatase B
11883	6.86	7.7	7.2	5.1	5.15	3.68	3.88	8.08	5.33	5.59	3.88	4.49	9.6	7.54	6.3	7.01	7.28	8.76	6.51	7.11	Arsa	arylsulfatase A
11886	12.07	10.72	14.59	13.55	10.69	13.95	14.12	8.84	11.89	12.98	10.16	17.27	33.44	32.36	58.6	43.3	41.64	10.06	10.31	7.25	Asah1	N-acylsphingosine amidohydrolase (acid,N-acylsphingosine amidohydrolase (acid,
11889	0	0	0	0	0.04	0	0	0	0	0	0	0	0.12	0.26	0	0.2	0	0	0	0	Asgr1	asialoglycoprotein receptor 1,asialoglycoprotein receptor 1,
11890	0.1	0.74	0.1	0.04	0.04	0.04	0.04	0.35	0.38	0	0.12	0.17	0.17	0	0	0	0.06	0.24	0	0.14	Asgr2	asialoglycoprotein receptor 2
11891	1.17	0.95	0.88	1.11	1.42	1.41	1.11	1.8	0.86	1.18	0.24	1.49	0.92	2.03	0.78	0.71	1.45	2.15	1.53	1.1	Rab27a	RAB27A protein,RAB27A protein,RAB27A protein,
11898	1.14	4.18	1.56	1.85	3.01	0.99	1.39	3.11	1.44	2.54	2.42	1.77	8.74	5.48	7.4	4.83	7.12	2.5	0.94	1.02	Ass1	argininosuccinate synthetase,argininosuccinate synthetase,argininosuccinate synthetase,
11899	0.1	0.45	0.39	0.23	0.2	0.17	0.26	0.14	0.26	0.45	0.33	0.34	0.14	0.08	0.04	0.03	0.11	0.29	0.45	0.2	Astn1	astrotactin 1,astrotactin 1,astrotactin 1,astrotactin 1,
11905	0.08	0	0.08	0.09	0	0.02	0.04	0.54	0.57	0.6	0.37	0.51	0.15	0.34	2.63	0.13	0.21	0.07	0.11	0.04	Serpinc1	serine (or cysteine) proteinase inhibitor, clade,serine (or cysteine) proteinase inhibitor, clade,
11906	0.93	1.36	0.81	1.7	1.75	1.92	2.19	2.35	2.12	1.92	1.33	1.5	2.47	2.85	1.66	1.46	1.9	1.57	1.56	1.82	Zfhx3	AT motif binding factor 1
11907	6.92	11.07	11.21	10.23	8.31	10.79	10.7	9.63	12.92	9.92	8.65	10.99	11.52	14.08	12.73	12.43	13.1	9.67	9.98	10.7	Ate1	arginine-tRNA-protein transferase 1 isoform 1,arginine-tRNA-protein transferase 1 isoform 1,
11908	20.84	27.95	21.65	26.69	21.35	17.95	19.01	43.45	35.56	35.96	31.42	30.1	28.23	36.73	30.52	34.04	22.82	29.71	29.85	32.64	Atf1	activating transcription factor 1
11909	6.61	12.53	9.15	10.35	7.98	5.21	5.34	16.5	14.86	16.48	16.38	15.82	13.21	13.23	11.07	14.91	11.67	9.14	9.63	8.97	Atf2	activating transcription factor 2 isoform 2,activating transcription factor 2 isoform 2,activating transcription factor 2 isoform 2,
11910	2.46	2.64	1.89	4.69	8.48	6.28	5.67	36.37	29.54	17.05	20.76	14.87	8.32	10.83	5.48	10.7	7.18	3.75	7.75	3.98	Atf3	activating transcription factor 3
11911	56.84	52.29	43.67	49.39	36.78	63.1	58	65.78	70.95	60.27	64.99	66.07	84.93	99.4	89.7	107.05	84.12	55.76	54.75	50.53	Atf4	activating transcription factor 4
11920	0.8	1.28	1.2	1.32	1.25	1.18	0.97	0.74	0.81	0.75	0.5	0.99	0.78	0.91	1.3	0.8	1.13	0.92	0.71	0.58	Atm	ataxia telangiectasia mutated homolog
11921	0.03	0	0	0	0	0	0	0	0	0	0	0	0	0	0	0	0	0	0	0	Atoh1	atonal homolog 1
11927	61.37	38.23	38.95	51.97	27.81	17.76	26.53	73.53	41.44	34	35.53	36.18	83.28	64.56	45.47	46.07	83.59	65.74	58.51	81.44	Atox1	antioxidant protein 1
11928	279.41	322.91	251.87	280.33	405.35	337.97	356.91	223.72	220.04	167.55	165.93	164.6	425.46	446.44	399.32	389.53	388.14	348.01	334.47	310.74	Atp1a1	Na+/K+ -ATPase alpha 1 subunit
11931	141	170.48	142.6	161.17	216.6	172.59	160.51	141.46	125.62	129.15	114.33	128.59	332.01	276.99	312.17	327.19	324.56	165.85	153.69	146.41	Atp1b1	Na+/K+ -ATPase beta 1 subunit
11932	5.99	10.85	7.24	7.72	6.02	5.38	6.84	7.81	8.57	5.34	8.09	6.98	5.57	4.67	3.29	2.77	4.35	9.76	11.01	9.25	Atp1b2	Na+/K+ -ATPase beta 2 subunit
11933	19.18	15.74	18.96	21.83	19.53	11.65	12.36	22.47	24.08	22.67	20.64	25.07	40.25	60	42.44	53.58	49.13	24.52	23.08	17.41	Atp1b3	Na+/K+ -ATPase beta 3 subunit
11936	2.77	2.53	0	1.71	1.19	0	1.48	0.96	1.03	0	0	0.48	3.01	0	0	0	1.72	2.45	1.81	2.94	Fxyd2	FXYD domain-containing ion transport regulator 2
11937	13.93	21.01	20.04	7.24	2.48	29.47	20.9	3.95	21.89	7.7	8.54	7.76	3.08	8.12	7.5	2.77	2.58	8.06	10.07	6.17	Atp2a1	ATPase, Ca++ transporting, fast twitch 1
11941	0.11	0.06	0.14	0.2	0.14	0.07	0.14	0.1	0.06	0.06	0.34	0.14	0.07	0.1	0.02	0.3	0.01	0.12	0.13	0.25	Atp2b2	plasma membrane calcium ATPase 2 isoform 1,plasma membrane calcium ATPase 2 isoform 1,
11944	0	0.03	0	0	0	0	0	0.08	0	0.03	0.02	0.01	0.03	0	0	0	0.01	0	0	0	Atp4a	ATPase, H+/K+ exchanging, gastric, alpha,ATPase, H+/K+ exchanging, gastric, alpha,ATPase, H+/K+ exchanging, gastric, alpha,
11945	0	0	0	0	0.08	0	0.04	0	0	0	0	0	0	0	0	0.12	0	0	0	0	Atp4b	ATPase, H+/K+ exchanging, beta polypeptide
11946	1797.51	1752.97	1397.56	2170.26	2143.56	1672.77	1923.43	1909.08	1863.62	1716.49	1191.91	1643.89	657.82	921.69	561.93	624.67	597.66	2397.39	2481.56	2411.49	Atp5a1	ATP synthase, H+ transporting, mitochondrial F1
11947	2407.14	2158.34	1973.81	2249.14	2075.8	2362.19	2127.92	2452.37	2078.98	2156.67	1975.55	2157.55	1053.61	1100.31	896.54	1099.7	978.43	2571.41	2501.22	2436.07	Atp5b	ATP synthase, H+ transporting mitochondrial F1
11949	929.54	739.1	806.2	920.81	607.42	472.96	595.32	657.32	716.03	680.72	712.13	724.96	320.71	322.84	314.67	344.08	347.77	771.19	716.24	697.49	Atp5c1	ATP synthase, H+ transporting, mitochondrial F1
11950	884.22	789.88	825.75	836.29	582.4	830.85	802.89	536.79	667.26	616.1	634.53	711.84	358.01	343.15	426.58	549.51	438.63	679.67	671.11	595.31	Atp5f1	ATP synthase, H+ transporting, mitochondrial F0
11951	1338.71	1197.92	1131.14	946.7	849.85	1341.25	1523.43	1462.87	788.75	733.67	965.53	601.44	423.42	310.26	276.39	359.71	353.22	1290.2	1307.21	1515.44	Atp5g1	ATP synthase, H+ transporting, mitochondrial F0,ATP synthase, H+ transporting, mitochondrial F0,ATP synthase, H+ transporting, mitochondrial F0,
11957	732.6	524.34	776.56	955.98	569.54	1224.04	1161.74	430.32	591.14	527.15	573.42	594.3	262.42	263.1	271.38	364.53	317.3	571.75	480.37	422.58	Atp5j	ATP synthase, H+ transporting, mitochondrial F0,ATP synthase, H+ transporting, mitochondrial F0,
11958	935.67	571.35	769.8	899.99	843.66	784.81	1027.16	768.32	131.07	78.27	544.39	95.63	268.53	49.17	193.59	299.46	252.18	777.39	570.95	613.28	Atp5k	ATP synthase, H+ transporting, mitochondrial
11964	6.43	9.09	5.85	8.85	11.99	11	9.54	11.95	10.45	11.41	13.96	12.31	25.06	18.35	28.08	17.24	25.13	7.86	7.45	7.26	Atp6v1a	ATPase, H+ transporting, lysosomal V1 subunit A,ATPase, H+ transporting, lysosomal V1 subunit A,ATPase, H+ transporting, lysosomal V1 subunit A,
11966	29.16	29.34	25.72	28.79	30.91	37.35	35.86	49.8	45.13	43.75	47.65	45.17	54.7	52.7	60.67	56.66	55.72	28.62	27.92	27.16	Atp6v1b2	vacuolar H+ATPase B2,vacuolar H+ATPase B2,
11972	24.38	29.34	21.56	24.02	19.38	10.78	11.92	52.39	33.95	36.45	30.59	39.33	46.2	40.13	35.65	32.65	38.75	29.76	34.95	26.34	Atp6v0d1	ATPase, H+ transporting, V0 subunit D isoform 1
11973	89.12	69.31	72.52	104.4	104.41	79.69	76.74	90.77	92.49	122.3	106.56	133.28	72.75	85.04	94.96	77.26	82.15	87.28	78.22	74.13	Atp6v1e1	vacuolar H+ ATPase E1
11974	29.19	17.76	19.08	19.15	20.61	16.1	13.21	24.13	15.07	15.18	17.05	21.5	45.2	16.58	25.93	42.52	37.39	24.54	32.5	26.18	Atp6v0e	ATPase, H+ transporting, V0 subunit e,ATPase, H+ transporting, V0 subunit e,
11975	16.47	19.78	18	19.38	22.6	12.21	12.91	20.93	18.81	21.16	18.41	20.13	33.48	44.14	31.03	35.18	31.25	27.72	24.06	24	Atp6v0a1	ATPase, H+ transporting, lysosomal V0 subunit a,ATPase, H+ transporting, lysosomal V0 subunit a,ATPase, H+ transporting, lysosomal V0 subunit a,ATPase, H+ transporting, lysosomal V0 subunit a,ATPase, H+ transporting, lysosomal V0 subunit a,
11977	0.7	1.5	1.12	1.92	2.03	2.01	1.5	0.93	2.2	1.28	1.07	1.81	3.45	3.94	4.62	3.32	4.11	1.52	0.83	1.21	Atp7a	ATPase, Cu++ transporting, alpha polypeptide,ATPase, Cu++ transporting, alpha polypeptide,
11979	0	0.06	0.01	0	0	0	0	0.02	0	0	0	0	0.01	0	0	0	0.01	0	0	0	Atp7b	ATPase, Cu++ transporting, beta polypeptide
11980	4	7.23	4.97	8.07	6.39	5.05	5.27	4.46	5.11	5.19	4.27	6.58	3.72	3.52	2.08	3.38	3.15	6.84	6.91	8.87	Atp8a1	ATPase, aminophospholipid transporter (APLT),,ATPase, aminophospholipid transporter (APLT),,ATPase, aminophospholipid transporter (APLT),,
11981	25.52	25.99	23.39	33.35	40.84	22.19	24.37	35.3	27.57	23.93	20.7	18.67	32.07	25.96	22.06	22.2	25.98	41.31	39.37	39.27	Atp9a	ATPase, class II, type 9A,ATPase, class II, type 9A,ATPase, class II, type 9A,ATPase, class II, type 9A,
11982	0.3	0.55	0.69	0.55	0.92	0.49	0.32	0.69	0.77	0.64	0.3	0.64	1.26	0.84	1.1	1.25	1.14	0.7	0.72	0.37	Atp10a	ATPase, class V, type 10A
11983	181.81	150.97	152.47	131.54	242.99	103.07	127.06	175.31	112.11	167.65	159.28	130.02	181.35	140.5	141.85	162.44	162.73	145.73	117.06	146.93	Atpif1	ATPase inhibitory factor 1
11984	91.66	69.46	85.53	78.3	121.63	32.65	55.14	210.1	115.87	129.4	153.22	104.99	199.7	147.47	133.8	118.93	151.51	105.47	128.41	117.44	Atp6v0c	ATPase, H+ transporting, lysosomal V0 subunit C,ATPase, H+ transporting, lysosomal V0 subunit C,
11987	3.01	5.38	4.67	3.57	3.34	1.83	2.97	5.99	5.69	2.85	3.61	3.48	5.67	6.77	4.59	4.72	4.95	7.68	6.74	6.61	Slc7a1	solute carrier family 7 (cationic amino acid,solute carrier family 7 (cationic amino acid,
11988	0.96	1.57	0.52	0.96	1.35	1.64	1.15	0.42	0.79	0.66	0.7	0.56	1.33	1.27	2.24	1.48	1.67	1.19	1.12	0.94	Slc7a2	solute carrier family 7 (cationic amino acid
11989	0	0	0	0.02	0	0.17	0.03	0.09	0	0.08	0	0.06	0	0	0.08	0.21	0.06	0.08	0	0	Slc7a3	solute carrier family 7 (cationic amino acid,solute carrier family 7 (cationic amino acid,
11990	2.99	5.34	3.11	4.29	4.06	2.99	2.81	3.86	5.18	4.17	3.79	4.57	4.53	4.64	6.19	3.82	4.23	5.93	4.95	5.39	Atrn	attractin
11991	30.44	32.77	32.58	30.96	47.05	48.44	42.38	36.55	51.61	58.56	37.07	58.71	43.11	68.24	48.47	84.58	54.69	25.53	23.95	20.44	Hnrpd	heterogeneous nuclear ribonucleoprotein D
11992	70.88	50.89	49.79	57.47	83.22	112.44	109.36	61.12	43.4	45.4	38.98	38.55	18.22	11.71	15.27	12.68	16.03	70.16	77.57	81.03	Auh	AU RNA-binding enoyl-coenzyme A hydratase,AU RNA-binding enoyl-coenzyme A hydratase,AU RNA-binding enoyl-coenzyme A hydratase,
11993	20.63	18.44	18.69	18.27	25.25	11.94	13.91	40.11	23.18	25.71	25.82	21.73	37.87	33.72	24.08	22.61	27.99	29.59	29.81	31.86	Aup1	ancient ubiquitous protein
11994	0	0	0.04	0	0	0	0	0.04	0	0	0	0.01	0	0	0	0	0	0.02	0	0	Pcdh15	protocadherin 15,protocadherin 15,protocadherin 15,protocadherin 15,protocadherin 15,protocadherin 15,protocadherin 15,protocadherin 15,
11997	2.71	1.84	3.29	2.07	2.12	2.21	1.89	3.38	1.49	1.73	0.77	1.51	1.38	0.99	1.57	1.09	1.28	2	2.5	2.02	Akr1b7	aldo-keto reductase family 1, member B7
11998	0	0.29	0.08	0	0.51	0	0	0.55	0	0	0	0	0	0	0	0	0	0.47	0.41	0.67	Avp	arginine vasopressin
12000	0	0.06	0	0	0	0	0.02	0.04	0.09	0	0	0	0	0.05	0.06	0	0	0	0.04	0	Avpr2	arginine vasopressin receptor 2
12005	6.16	9.01	5.85	6.97	6.6	3.88	4	13.15	9.71	13.22	10.3	11.02	10.48	16.58	7.98	13.8	8.81	8.75	9.33	8.86	Axin1	axin 1,axin 1,
12006	0.69	1.13	1.32	1.3	1.87	1.24	1.62	1.26	1.48	1.41	1.32	0.86	0.69	0.62	0.57	0.46	0.55	1.94	1.38	1.8	Axin2	axin2
12009	2.48	1.15	1.62	3.54	3.26	1.55	1.85	2.56	2.27	2.32	1.48	1.87	1.7	2.37	1.36	1.51	1.8	3.51	3.83	3.95	Azi1	pre-acrosome localization protein 1
12010	149.92	209.29	125.26	139.4	411.45	96.42	95.48	345.49	144.7	120.52	164.84	130.07	252.36	135.74	262.09	179.96	278.31	247.18	239.38	171.58	B2m	beta-2-microglobulin
12012	0.11	0	0	0	0.04	0.05	0	0	0	0	0	0.05	0.06	0	0	0.07	0.13	0	0.04	0	Baat	bile acid-Coenzyme A: amino acid
12013	6.76	7.84	5.19	10.54	10.2	7.02	9.13	13.34	10.12	13.88	11.54	12.25	11.21	13.87	10.01	12.55	10.47	10.56	10.03	9.54	Bach1	BTB and CNC homology 1,BTB and CNC homology 1,
12014	0.39	1.13	0.34	0.51	0.44	0.2	0.41	0.8	0.52	0.35	1.03	1.11	0.46	0.3	0.5	0.33	0.52	0.46	0.76	0.44	Bach2	BTB and CNC homology 2
12015	8.8	5.03	8.53	10.44	10.88	8.22	8.94	24.65	10.44	14.61	11.92	10	13.63	14.14	4.66	8.31	11.74	13.46	15.35	16.21	Bad	Bcl-associated death promoter
12017	114.23	112	83.41	115.66	127.36	78.73	85.85	96.86	86.27	94.96	80.12	94.34	67.04	76.11	53.96	83.38	70.67	107.94	109.48	108.36	Bag1	Bcl2-associated athanogene 1 isoform 1L
12018	6.8	8.96	4.01	7.23	8.09	6.57	7.54	28.07	15.67	18.56	18.07	19.45	24.51	26.68	16.4	19.21	21.37	8.68	10.35	13.55	Bak1	BCL2-antagonist/killer 1
12021	0.13	0.27	0.05	0.31	0.31	0.25	0.12	0.12	0.3	0.09	0.08	0.11	0.27	0.34	0.57	0.18	0.31	0.18	0.17	0.09	Bard1	BRCA1 associated RING domain 1
12023	0.04	0.08	0.17	0.1	0.11	0.04	0.03	0	0.27	0	0.22	0.06	0	0	0.17	0	0	0.11	0	0.13	Barx2	BarH-like homeobox 2
12028	17.59	17	15.29	19.17	19.45	8.76	10.19	51.71	35.21	46.12	35.12	33.25	35.76	41.15	14.51	25.82	24.68	21.95	19.25	31.27	Bax	Bcl2-associated X protein
12029	4.82	9.66	5.81	4.86	3.4	2.68	3.67	12.93	6.06	7.83	8.98	6.17	6.63	5.3	3.84	3.62	4.57	7.16	7.64	12.94	Bcl6b	B-cell CLL/lymphoma 6, member B
12032	0	0	0	0.02	0	0	0	0	0.04	0.05	0	0.02	0.07	0	0	0.07	0	0	0	0.08	Bcan	brevican,brevican,
12033	8.14	8.16	14.49	15.59	12.24	17.96	16.35	6.75	15.6	16.34	15.09	19.64	10.14	13.84	20.23	19.91	15.24	7.24	6.88	3.39	Bcap29	B-cell receptor-associated protein 29,B-cell receptor-associated protein 29,
12034	110.63	87.94	67.56	91.78	124.28	68.62	74.36	131.29	87.13	93.64	90.2	83.76	89.58	95.46	44.23	79.6	74.84	108.94	119.61	137.34	Phb2	B-cell receptor-associated protein 37
12035	0.52	0.14	0.31	0.4	0.29	0.24	0.06	0.6	0.53	0.36	0.39	0.29	3.06	3.65	1.87	3.51	2.93	0.23	0.1	0.28	Bcat1	branched chain aminotransferase 1, cytosolic,branched chain aminotransferase 1, cytosolic,
12036	60.25	55.35	51.21	69.91	59.56	43.46	43.81	77.22	53.4	51.83	42.67	41.65	29.53	24.45	21.35	24.42	24.24	66.23	73.83	79.89	Bcat2	branched chain aminotransferase 2,,branched chain aminotransferase 2,,
12038	2.17	2.01	4.24	4.59	4.95	4.07	3.34	2.36	3.07	2.81	3.61	5.26	1.91	2.27	2.42	1.81	2.33	2.58	2.34	2.11	Bche	butyrylcholinesterase,butyrylcholinesterase,butyrylcholinesterase,
12039	145.67	107.15	114.41	152.35	118.44	80.11	97.96	175.02	121.51	160.35	165.13	129.49	57.76	57.75	30.67	42.68	42.05	125.21	150.15	198.32	Bckdha	branched chain ketoacid dehydrogenase E1, alpha
12040	32.59	36.86	28.42	34.98	28.13	33.7	28.66	23.78	24.4	19.46	19.93	22.39	11.65	10.04	8.43	9.23	9.89	39.45	38.47	37.58	Bckdhb	branched chain ketoacid dehydrogenase E1, beta
12041	46.99	45.41	41.86	47.14	36.84	25.42	30.25	68.4	50.3	51.28	47.23	45.94	28.47	27.91	20.65	22.97	24.31	64.47	71.36	76.54	Bckdk	branched chain ketoacid dehydrogenase kinase
12042	8.07	9.85	8.24	9.19	7.85	7.79	10.43	13.77	13.6	10.66	8.38	13.31	14.62	18.75	14.08	18.47	13.89	11.02	11.1	11.23	Bcl10	B-cell leukemia/lymphoma 10
12044	0.28	0.52	0.21	0.33	0.52	0	0.15	0.79	0.53	2.45	0.17	2.41	6.25	3.21	26.14	5.77	11.88	0	0.28	0	Bcl2a1a	B-cell leukemia/lymphoma 2 related protein A1a
12045	0.5	0.13	0.48	0.38	2.23	0.06	0.41	1.08	1.16	3.48	0.35	3.34	13.5	8.2	30.21	8.96	19.41	0.17	0.28	0.5	Bcl2a1b	B-cell leukemia/lymphoma 2 related protein A1b
12046	0.18	0.17	0.09	0	0	0	0	0	0	0.49	0.11	0.35	2.17	0.42	6.87	1.1	3.42	0	0	0	Bcl2a1c	B-cell leukemia/lymphoma 2 related protein A1c
12047	0.28	0.13	0.14	0.6	0.8	0	0.05	0.98	0.74	2.45	0.17	2.51	8.18	3.99	26.14	5.86	12.83	0.17	0.28	0	Bcl2a1d	B-cell leukemia/lymphoma 2 related protein A1d
12048	14.64	11.15	11.74	29.32	36.44	38.38	35.55	33.07	35.63	23.61	20.99	22.72	36.77	51.48	29.21	29.56	30.62	24.75	28.21	25.14	Bcl2l1	Bcl2-like 1,Bcl2-like 1,Bcl2-like 1,Bcl2-like 1,
12049	0	0	0	0	0.1	0.06	0.09	0	0.19	0	0	0	0	0	0	0	0	0	0	0	Bcl2l10	Bcl2-like 10
12050	9.28	9.89	11.6	16.84	21.15	9.03	11.54	23.65	14.94	17.17	14.77	12.73	18.33	17.98	8.93	12.54	12.62	20.71	22.13	25.23	Bcl2l2	Bcl2-like 2,Bcl2-like 2,
12051	1.98	1.19	1.23	0.96	2.98	0.67	0.93	6.29	4.57	4.99	6.24	3.67	5.61	7.52	3.49	4.05	4.36	1.79	1.53	3.18	Bcl3	B-cell leukemia/lymphoma 3
12053	4.26	6.92	4.8	9.7	9.1	4.94	5.3	10.49	8.83	7.25	6.52	5.86	9.58	8.12	7	7.36	8.45	7.02	13.51	15.14	Bcl6	B-cell leukemia/lymphoma 6
12054	22.07	27.29	18.14	27.64	41.27	54.69	53.69	27.35	12.66	17.54	27.7	15.47	23.35	23.82	14.49	23.56	22.92	24.41	30.49	29.79	Bcl7b	B-cell CLL/lymphoma 7B
12055	17.68	18.89	15.04	14.75	18.25	6.74	9.26	28.56	9.36	11.99	26.3	8.48	26.68	17.26	10.56	18.82	18.79	16.18	21.95	18.96	Bcl7c	B-cell CLL/lymphoma 7C
12057	0	0	0.07	0.06	0.12	0.03	0.13	0.1	0	0	0.4	0.17	0.04	0.23	0	0.18	0.17	0	0.05	0.1	Opn1sw	opsin 1 (cone pigments), short-wave-sensitive,opsin 1 (cone pigments), short-wave-sensitive,
12061	0	0	0	0	0	0	0	0	0.1	0.06	0	0.34	0.21	0.67	0.12	0.4	0.23	0	0	0	Bdkrb1	bradykinin receptor, beta 1
12062	0.09	0	0.06	0.2	0.16	0.28	0.1	0.44	0.09	0.1	0.46	0.19	0.87	0.81	1.33	0.42	0.7	0.3	0.45	0.41	Bdkrb2	bradykinin receptor, beta 2
12068	5.07	3.25	7.96	8.62	4.68	14.62	10.82	2.65	5.47	5.46	3.33	8.03	5.95	7.26	12.53	11.95	14.8	4.84	3.93	3.86	Bet1	blocked early in transport 1 homolog
12069	0.45	0.16	0.09	0.14	0.43	0.31	0.06	0.25	0.13	0.33	0.22	0.12	0.39	0	0	0	0.05	0.11	0.35	0	Bex2	brain expressed X-linked 2
12075	0.2	0.2	0.13	0.12	0.35	0.16	0.3	0.21	0.44	0.14	0.02	0.12	0.32	0.47	0.55	0.07	0.48	0.31	0.49	0.1	Bfsp1	beaded filament structural protein in lens-CP94
12091	5.49	5.13	5.97	6.26	7.7	5.7	5.61	8.08	5.97	3.85	3.56	4.87	13.59	8.41	10.74	5.81	11.74	8.56	9.39	8.23	Glb1	galactosidase, beta 1,galactosidase, beta 1,galactosidase, beta 1,
12097	0	0	0	0	0	0	0	1.18	0	0	0	0.14	0	0	0	0	0	0	0	0	Bglap2	bone gamma-carboxyglutamate protein 2
121021	2.23	3.2	2.6	2.56	2.99	1.45	1.7	4.5	3	3.27	2.97	2.4	8.64	8.33	6.41	4.32	6.51	4.2	4.43	3.64	Cspg4	chondroitin sulfate proteoglycan 4,chondroitin sulfate proteoglycan 4,chondroitin sulfate proteoglycan 4,
121022	37.39	30.93	26.05	26.01	28.28	8.93	19.14	39.82	22.31	23.52	27.85	21.13	22.2	13.49	11.34	14.88	17.88	34.3	41.05	41.72	Mrps6	mitochondrial ribosomal protein S6
12111	60.48	110.74	64.35	68.3	60.77	57.66	53.87	149.26	95.72	80.19	73.76	77.54	606.42	473.01	538.58	396.09	543.95	119.78	123.24	93.16	Bgn	biglycan
12116	0.07	0	0	0	0	0	0	0	0	0	0	0	0	0	0	0	0	0	0	0	Bhmt	betaine-homocysteine methyltransferase
12121	0.66	0.45	0.64	0.95	1.11	1.45	1.1	0.52	0.66	0.99	0.44	1.04	1.83	1.5	2.29	0.89	2.03	0.49	0.43	0.59	Bicd1	bicaudal D homolog 1,bicaudal D homolog 1,
12122	1.11	0.38	0.47	1.02	0.51	0.3	0.54	1.35	0.93	0.88	1.44	0.77	2.94	3.14	1.28	3.29	3.37	1.31	0.91	1.47	Bid	BH3 interacting domain death agonist
12124	6.73	5.58	3.26	3.72	2.16	2.21	1.6	4.38	3.02	3.51	1.86	2.35	1.99	1.75	1.41	1.11	1.86	4.81	5.46	5.46	Bik	Bcl2-interacting killer
12125	2.98	2.51	0.89	1.61	4.49	2.39	3.1	2.54	2.72	3.75	2.79	1.67	2.74	3.58	10.39	0.83	3.1	4.06	3.6	1.94	Bcl2l11	BCL2-like 11 apoptosis facilitator isoform 2,BCL2-like 11 apoptosis facilitator isoform 2,
12140	1.97	0.45	1.07	0	0	0.21	0.09	0	0	0	0.15	0.24	2.81	2.88	1.37	4.18	2.47	0	0	0	Fabp7	fatty acid binding protein 7, brain
12142	1.23	1.02	0.58	0.24	0.4	0.24	0.31	0.54	0.45	0.44	0.17	0.25	0.42	0.2	0.38	0.33	0.42	0.49	0.58	0.48	Prdm1	PR domain containing 1, with ZNF domain
12143	0.97	1.46	1.35	1.79	1.73	0.74	0.74	2.54	1.14	1.61	1.36	1.34	2.02	1.11	2.79	0.61	1.56	1.22	1.66	1.75	Blk	B lymphoid kinase
12144	0.26	0.56	0.28	0.51	0.34	0.58	0.49	0.26	0.41	0.45	0.16	0.42	1.04	2.2	2.02	2.05	1.47	0.39	0.2	0.34	Blm	Bloom syndrome protein homolog,Bloom syndrome protein homolog,
12145	0.24	0.06	0.12	0.02	0.05	0	0	0	0.09	0	0.29	0	0.1	0.09	0.5	0.11	0.12	0.07	0	0.09	Blr1	Burkitt lymphoma receptor 1
12151	23.78	26.29	28.16	29.36	21.92	26.6	23.61	25.91	37.41	32.87	26.39	36.9	22.04	31.66	29.62	39.09	29.46	19.89	17.74	17.66	Bmi1	Bmi1 polycomb ring finger oncogene,Bmi1 polycomb ring finger oncogene,
12153	8.72	10.62	9.93	10.68	13.87	9.51	9.71	19.2	13.05	11.54	9.13	9.83	46.92	53.6	32.75	40.94	37.98	14.95	16.22	14.24	Bmp1	bone morphogenetic protein 1
12154	0	0.05	0	0.12	0	0.14	0.04	0	0.08	0	0	0	0	0.08	0.22	0	0.06	0.06	0.21	0	Bmp10	bone morphogenetic protein 10 preproprotein
12155	0.06	0	0	0	0	0	0	0.08	0	0	0	0	0.03	0	0	0	0.05	0	0	0	Bmp15	bone morphogenetic protein 15
12156	0.6	0.42	0.61	0.31	0.25	0.42	0.35	0.83	0.72	0.26	0.49	0.32	1.37	0.85	0.4	1.08	0.65	0.71	0.71	0.53	Bmp2	bone morphogenetic protein 2
12159	2.65	4.08	3.15	4.58	7.01	5.22	6.15	7.18	5.18	5.1	5.7	4.99	8.29	10.58	5.3	6.39	6.1	7.41	7.45	6.54	Bmp4	bone morphogenetic protein 4
12160	0.28	0.16	0.3	0.33	0.62	1.06	0.99	0.75	0.97	0.62	0.31	0.65	1.11	0.44	0.69	0.28	0.41	0.67	0.56	0.16	Bmp5	bone morphogenetic protein 5
12161	5.75	2.49	4.61	7.51	7.18	6.71	7.37	9.64	9.31	7.01	7.05	6.15	10	8.73	5.38	5.71	6.84	8.73	7.83	8.46	Bmp6	bone morphogenetic protein 6
12162	0.46	0.72	0.83	0.56	0.96	0.5	0.56	1.73	0.09	0.83	0.85	0.62	0.36	0.05	0.08	0.22	0.48	1.11	1.39	1.68	Bmp7	bone morphogenetic protein 7,bone morphogenetic protein 7,
12163	0	0	0	0.03	0	0	0	0	0	0	0	0	0.07	0	0	0	0.08	0	0	0	Bmp8a	bone morphogenetic protein 8a
12164	0	0	0	0	0	0	0	0.09	0	0.06	0	0.04	0	0	0	0	0.02	0	0	0	Bmp8b	bone morphogenetic protein 8b
12165	0	0	0.05	0	0	0	0	0	0	0	0	0	0	0	0	0	0	0	0	0	Gdf2	growth differentiation factor 2
12166	13.51	19.76	18.64	26.18	23.15	21.53	16.6	22.46	30.18	33.36	33.2	40.78	19.2	29.34	26.77	29.03	24.48	16.26	16.23	12.27	Bmpr1a	bone morphogenetic protein receptor, type 1A,bone morphogenetic protein receptor, type 1A,
12167	0	0	0	0	0.04	0.05	0	0.08	0.08	0.1	0.1	0.04	0.06	0	0	0.03	0.06	0	0.18	0.08	Bmpr1b	bone morphogenetic protein receptor, type 1B,bone morphogenetic protein receptor, type 1B,bone morphogenetic protein receptor, type 1B,bone morphogenetic protein receptor, type 1B,
12168	3.54	10.65	7.07	9.98	7.36	6.45	5.52	7.49	10.52	8.82	7.78	9.8	11.67	13.34	13.88	9.36	11.72	6.91	4.73	7.22	Bmpr2	bone morphogenic protein receptor, type II
12169	0.86	0.74	0.97	0.78	0.84	0.77	0.87	0.6	0.99	1.17	0.29	0.9	1.74	0.93	1.02	0.81	1.95	0.65	0.84	0.47	Bmx	BMX non-receptor tyrosine kinase
12173	0	0	0	0.02	0	0	0	0	0	0	0	0	0.03	0	0	0	0.01	0	0	0	Bnc1	basonuclin 1
12175	53.78	52.78	48.99	54.77	54.38	51.6	70.32	32.68	44.58	47.47	42.6	50.78	72.95	58.83	88.7	73.07	77.97	40.95	49	43.44	Bnip2	BCL2/adenovirus E1B interacting protein 1, NIP2
12176	83.14	79.7	83.09	95.8	153.3	131.34	142.15	52.09	68.7	64.15	79.09	75.87	71.5	47.25	79.41	50.24	79.96	140.56	84.83	96.57	Bnip3	BCL2/adenovirus E1B interacting protein 1, NIP3
12177	36.97	49.37	26.63	46.66	36.02	32.03	31.21	41.81	42.35	45.94	43.47	44.73	58.81	55.32	59.51	59.19	51.13	38.7	40.63	41.89	Bnip3l	BCL2/adenovirus E1B interacting protein 3-like,BCL2/adenovirus E1B interacting protein 3-like,
12180	97.3	147.42	102.25	114.41	103.32	77.36	71.95	85.49	85.93	71.75	58.16	64.48	41.13	24.45	38.82	21.4	33.68	139.11	140.94	139.03	Smyd1	SET and MYND domain containing 1,SET and MYND domain containing 1,SET and MYND domain containing 1,
12181	11.15	7.89	8.92	12.56	12.74	6.64	9.74	24.34	17.02	14.54	15.12	12.94	13.99	14.75	9.88	14.99	11.97	15.72	15.99	14.42	Bop1	block of proliferation 1
12182	0	0.28	0.15	0.04	0.25	0.09	0.15	0.14	0.15	0	0	0.03	8.59	3.37	3.47	5.29	7.5	0.06	0	0	Bst1	bone marrow stromal cell antigen 1
12183	12.58	13.86	12.41	10.78	8.83	11	10.21	10.39	11.77	9.13	8.58	8.53	10.78	9.46	5.52	8.45	10.79	10.91	9.33	11.41	Bpgm	2,3-bisphosphoglycerate mutase,2,3-bisphosphoglycerate mutase,
12189	0.06	0.36	0.04	0.16	0.17	0.24	0.2	0.15	0.12	0.19	0.09	0.2	0.7	0.61	0.27	0.8	0.8	0.07	0.04	0.23	Brca1	breast cancer 1,breast cancer 1,breast cancer 1,
12190	0.2	0.28	0.23	0.3	0.33	0.26	0.26	0.2	0.3	0.19	0.12	0.18	0.43	0.45	0.67	0.67	0.6	0.25	0.25	0.16	Brca2	breast cancer 2
12192	24.49	16.97	22.53	16.73	22.45	7.95	10.44	45.12	25.52	26.94	31.7	16.79	40.78	40.56	26.5	23.04	27.52	27.84	29.6	32.56	Zfp36l1	zinc finger protein 36, C3H type-like 1
12193	4.77	1.64	2.57	4.09	8.13	1.82	2.35	12.98	6.92	7.73	5.57	4	23.16	24.93	7.24	12.18	13.23	7.09	8.99	10.47	Zfp36l2	zinc finger protein 36, C3H type-like 2
12211	3.79	7.15	5.17	5.4	4.04	3.74	3.62	6.27	6.65	6.4	6.27	6.8	8.55	7.18	7.77	5.85	9.07	5.08	4.77	4.73	Birc6	baculoviral IAP repeat-containing 6,baculoviral IAP repeat-containing 6,
12212	0.4	0.74	0.65	0.63	0.6	0.7	0.57	0.56	0	0.49	0.16	0.49	0.36	0.32	0.19	0.73	0.4	0.32	0.18	0.95	Chic1	cysteine-rich hydrophobic domain 1
12215	619.02	578.74	530.27	604.15	429.32	450.28	405.11	815.45	680.11	681.86	532.64	618.13	360.87	398.78	310.31	299.52	307.43	714.37	805.82	763.44	Bsg	basigin isoform 1
12217	0.01	0.03	0.01	0.01	0.02	0	0	0.05	0.03	0.01	0.03	0.03	0.04	0.07	0.06	0.01	0.03	0.01	0.02	0	Bsn	bassoon protein
12223	0	0.65	0.43	0.35	0.58	0.39	0.76	0.98	0.66	0.32	0.32	0.59	0.39	0.14	0	0	0.84	1.15	0.35	0.75	Btc	betacellulin, epidermal growth factor family
12224	0.03	0	0.03	0.12	0.11	0.25	0.1	0.26	0	0	0	0.09	0.58	0.54	1.65	0.13	0.68	0.06	0	0.23	Klf5	Kruppel-like factor 5,Kruppel-like factor 5,
12226	10.66	24.55	10.19	12.07	9	8.82	7.23	41.41	22.65	27.76	26.26	29.57	36.5	46.18	31.01	45.27	33.87	17.37	19.52	20.49	Btg1	B-cell translocation gene 1, anti-proliferative
12227	22.03	13.31	11.55	9.79	12.27	6.67	7.59	108.24	68.55	65.81	88.72	53.73	45.78	31.54	21.3	29.94	33.25	15.15	21.19	19.14	Btg2	B-cell translocation gene 2, anti-proliferative
12228	9.64	13.36	6.54	6.13	7.04	6.84	9.91	10.42	7.09	7.85	10.15	9.01	18.18	22.34	12.63	24.18	17.17	10.51	9.56	8.73	Btg3	B-cell translocation gene 3
12229	0.42	0.26	0.39	0.39	0.64	0.25	0.45	0.36	0.84	0.56	0.26	0.44	3.64	2.47	6.62	3.87	4.62	0.5	0.09	0.1	Btk	Bruton agammaglobulinemia tyrosine kinase
12231	0	0	0	0	0	0	0	0	0	0	0	0	0	0	0.07	0	0.01	0	0	0	Btn1a1	butyrophilin, subfamily 1, member A1,butyrophilin, subfamily 1, member A1,butyrophilin, subfamily 1, member A1,
12234	6.43	6.4	7.17	8.85	8.33	8.14	7.58	13.03	10.38	11.43	8.9	11.69	8.06	8.68	8.53	7.4	8.95	8.03	9.1	8.14	Btrc	beta-transducin repeat containing protein,beta-transducin repeat containing protein,
12235	0.03	0.19	0.23	0.06	0.25	0.2	0.29	0.23	0.2	0.21	0.2	0.1	0.61	0.92	0.71	1.38	0.89	0.21	0.08	0.27	Bub1	budding uninhibited by benzimidazoles 1 homolog,budding uninhibited by benzimidazoles 1 homolog,
12236	0.04	0.81	0.33	0.29	0.44	0.41	0.36	0.43	0.24	0.36	0.21	0.12	2.04	2.49	1.04	1.61	1.79	0.13	0.16	0.3	Bub1b	budding uninhibited by benzimidazoles 1 homolog,
12237	17.23	19.82	18.16	21.39	21.96	18.96	18.03	24.91	23.2	18.78	19.16	21.54	30.08	32.69	34.06	22.67	27.63	23.38	24.85	24.61	Bub3	budding uninhibited by benzimidazoles 3 homolog
12238	45.37	25.14	39.16	37.8	49.97	86.76	75.31	53.66	33.72	51.65	51.63	53.34	41.95	41.67	24.89	50.99	51.8	38.1	32.59	37.42	Commd3	COMM domain containing 3
12257	31.51	16.54	31.38	16.98	28.43	34.8	33.6	40.8	23.2	13.14	23.27	13.98	155.3	93.48	94.66	101.06	110.52	25.63	32.81	32.9	Tspo	peripheral benzodiazepine receptor
12258	75.08	72.67	72.34	62.75	48.14	30.35	33.29	109.21	85.79	79.99	98.43	84.61	409.9	300.82	290.22	326.19	368.39	79.45	88.23	98.33	Serping1	serine (or cysteine) proteinase inhibitor, clade,serine (or cysteine) proteinase inhibitor, clade,
12259	32.62	25.02	23.15	27.23	54.21	39.26	38.64	53.25	31.45	29.96	26.83	22.55	198.69	118.87	118.71	85.94	143.86	28.71	29.37	36.52	C1qa	complement component 1, q subcomponent, A chain
12260	23.14	20.53	13.72	16.81	27.44	11.04	12.31	36.4	20.87	17.64	21.13	14.16	118.27	63.34	95.88	66.91	101.06	15.16	20.47	24.2	C1qb	complement component 1, q subcomponent, B chain
12261	65.78	71.72	50.85	75.8	90.83	96.13	77.89	130.03	78.15	104.4	87.86	96.21	41.89	64.91	41.8	65.39	44.7	79.04	80.54	89.17	C1qbp	complement component 1, q subcomponent binding
12262	21.11	15.71	14.79	14.45	31.67	16.47	28.37	38.26	22.79	20.78	19.65	13.89	132.04	83.71	87.15	63.7	101.44	19.67	26.39	27.84	C1qc	complement component 1, q subcomponent, gamma
12263	0.37	0.32	0.17	0.34	0.23	0.37	0.23	0.96	0.23	0.21	0.35	0.22	1.82	0.99	0.86	0.72	1.19	0.46	0.58	0.11	C2	complement component 2 (within H-2S)
12265	0.18	0.63	0.38	0.37	0.8	0.26	0.31	0.76	0.38	0.47	0.37	0.49	0.29	0.3	0.86	0.3	0.29	0.45	0.37	0.48	Ciita	class II transactivator,class II transactivator,class II transactivator,class II transactivator,class II transactivator,
12266	22.74	20.38	22.97	23.09	53.39	19.98	22.49	36.17	32.73	29.86	28.57	27.69	75.18	54.77	63.9	45.89	66.95	22.7	27.38	31.49	C3	complement component 3
12267	1.32	1.21	1.3	1.21	2.57	1.84	2.7	1.42	1.75	0.33	0.42	0.58	28.59	20.41	45.09	30	32.57	1.45	1.19	0.96	C3ar1	complement component 3a receptor 1
12268	3.85	3.88	2.72	5.52	5.17	2.94	3.45	7.07	5.72	7.72	4.43	6.04	13.88	22.09	12.66	14.54	12.35	4.73	6.23	9.91	C4b	complement component 4 (within H-2S)
12269	0.09	0	0	0	0	0	0	0	0.04	0	0	0	0	0	0	0	0	0	0	0	C4bp	complement component 4 binding protein
12273	1.22	2.17	1.19	2.41	4.18	2.15	2.5	5.29	4.68	2.44	3.39	2.31	34.91	29.57	30.76	20.14	27.1	1.96	2.86	3.54	C5ar1	complement component 5, receptor 1
12274	0.14	0	0.07	0	0.1	0	0.01	0.05	0.16	0	0	0	0.19	0.47	0.52	0.21	0.4	0	0.12	0	C6	complement component 6
12279	0	0	0	0.02	0	0	0	0	0	0	0	0.03	0	0	0	0.12	0	0	0	0	C9	complement component 9
12282	11.38	15.84	10.16	12.48	14.9	9.77	10.74	24.54	18.64	16.44	15.9	15.22	12	12.2	8.19	12.11	9.27	13.2	16.33	14.09	Hyou1	hypoxia up-regulated 1,hypoxia up-regulated 1,
12283	17.23	34.58	20.48	28.38	21.42	17.22	17.63	26.24	30.5	34.74	19.5	32.05	37.75	71.43	38.03	44.8	36.29	33.47	31.33	31.38	Cab39	MO25 protein,MO25 protein,
12286	0.44	0.53	0.46	0.39	0.82	0.57	0.51	0.95	0.34	0.5	0.5	0.3	0.55	0.56	0.56	0.31	0.48	0.81	0.79	0.75	Cacna1a	calcium channel, voltage-dependent, P/Q type,
12287	0	0	0	0	0	0.01	0.01	0	0	0.01	0.04	0.01	0.02	0.1	0.05	0.04	0.04	0.01	0.02	0.04	Cacna1b	calcium channel, voltage-dependent, N type,
12288	19.7	30.93	23.45	28.1	31.7	29.59	31.86	19.61	26.55	21.35	21.82	18.59	24.43	20.58	19.5	14.73	21.03	40.35	33.81	41.1	Cacna1c	calcium channel, voltage-dependent, L type,,calcium channel, voltage-dependent, L type,,calcium channel, voltage-dependent, L type,,
12289	0.27	0.33	0.23	0.42	0.49	0.3	0.29	0.56	0.47	0.44	0.21	0.35	3.48	3.65	2.86	3.15	3.44	0.58	0.29	0.46	Cacna1d	calcium channel, voltage-dependent, L type,
12290	0	0	0	0	0	0.01	0.01	0	0	0.02	0	0.02	0.14	0.01	0	0.03	0.05	0.01	0	0	Cacna1e	calcium channel, voltage-dependent, R type,
12291	3.87	4.4	3.02	4.56	4.47	3.74	3.92	6.6	4.77	3.64	3.12	2.79	1.45	0.85	0.77	0.61	1.02	7.66	9.77	8.29	Cacna1g	calcium channel, voltage-dependent, T type,,calcium channel, voltage-dependent, T type,,calcium channel, voltage-dependent, T type,,
12292	2.01	1.94	1.55	1.56	1.11	1.42	1.36	1.25	1.13	1.47	1.22	1.39	0.29	0.27	0.12	0.04	0.17	2.03	1.95	2.3	Cacna1s	calcium channel, voltage-dependent, L type,,calcium channel, voltage-dependent, L type,,
12293	12.71	17.12	16.71	26.25	17.16	16.09	16.64	8.1	19.08	18.57	13.09	19.91	16.05	20.95	20.4	17.58	20.78	15.9	11.83	15.62	Cacna2d1	calcium channel, voltage-dependent, alpha2/delta,calcium channel, voltage-dependent, alpha2/delta,calcium channel, voltage-dependent, alpha2/delta,calcium channel, voltage-dependent, alpha2/delta,calcium channel, voltage-dependent, alpha2/delta,
12294	0.39	0.33	0.33	0.36	0.27	0.18	0.21	0.23	0.41	0.29	0.14	0.27	0.32	0.2	0.06	0.08	0.16	0.29	0.17	0.37	Cacna2d3	calcium channel, voltage-dependent, alpha2/delta
12295	7.03	6.82	4.4	6.36	6.38	4.02	6.64	8.22	3.76	4.97	5.76	5	7.9	6.68	6.27	6.23	6.68	9.76	12.76	11.46	Cacnb1	calcium channel, voltage-dependent, beta 1
12296	16.81	21.27	17.57	19.42	23.47	12.52	13.6	16.53	20.12	13.89	12.57	15.46	13.69	17.03	16.5	13.01	14.65	22.39	24.83	22.23	Cacnb2	calcium channel, voltage-dependent, beta 2,calcium channel, voltage-dependent, beta 2,calcium channel, voltage-dependent, beta 2,
12297	1.33	2.09	0.8	1.85	1.5	0.58	0.68	3.47	1.83	2.36	4.67	1.19	5.2	3.96	3.08	3.12	3.91	2.43	1.95	1.93	Cacnb3	calcium channel, voltage-dependent, beta 3
12298	0.16	0.4	0.15	0.39	0.23	0.11	0.2	0.39	0.05	0.23	0.31	0.31	0.41	0.1	0	0.12	0.61	0.41	0.29	0.09	Cacnb4	calcium channel, voltage-dependent, beta 4,calcium channel, voltage-dependent, beta 4,
12299	0.06	0	0.06	0.05	0.1	0.05	0	0	0	0.11	0.15	0.08	0.07	0.09	0.11	0.14	0.1	0	0.08	0	Cacng1	voltage-dependent calcium channel gamma-1
12301	38.75	29.35	42	57.74	47.94	44.4	38.22	29.79	55.62	72.49	55.28	77.42	26.64	52.87	34.86	60.22	38.69	30.07	32.04	21.32	Cacybp	calcyclin binding protein
12304	14.27	15.33	11.28	12.17	15.72	13.71	14.46	18.36	14.17	13.58	11.62	13.58	27.84	22.29	21.78	22.16	26.17	15.2	16.34	12.22	Pdia4	protein disulfide isomerase associated 4
12305	9.78	12.07	10.18	13.45	14.88	9.29	10.79	24.86	16.16	16.08	13.58	11.48	18.99	17.06	12.65	10.87	13.6	16.46	16.44	18.68	Ddr1	discoidin domain receptor family, member 1,discoidin domain receptor family, member 1,
12306	48.92	66.19	39.99	48.73	58.13	58.48	65.28	59.21	45.32	42.71	44.48	44.31	338.21	253.73	248.3	284.71	289.74	55.47	49.57	52.67	Anxa2	annexin A2,annexin A2,
12310	0	0	0	0	0	0	0	0	0	0	0	0	0.22	0	0	0.25	0	0	0	0	Calca	calcitonin isoform Calca preproprotein
12311	0	0.06	0	0	0	0	0.02	0	0	0	0.11	0	0	0	0	0	0	0	0	0	Calcr	calcitonin receptor isoform a precursor
12313	138.35	146.4	109.77	175.14	114.15	68.05	72.43	228.3	206.4	230.78	210.03	225.81	351.02	363.43	354.5	406.86	346.71	148.3	148.75	143.51	Calm1	calmodulin 1
12314	151.59	127.2	102.75	183.83	207.09	220.84	214.94	145.41	176.44	164.72	148.41	199.57	196.51	295.86	240.2	287.52	223.94	136.03	111.83	93.54	Calm2	calmodulin 2
12315	109.73	152.6	103.08	186.72	174.95	130.41	138.81	248.35	237.37	269.96	203.15	250.05	241.71	292.16	200.67	208.78	213.13	175.91	181.99	177.03	Calm3	calmodulin 3
12316	0.05	0.3	0.23	0.31	0.22	0.33	0.33	0.42	0.36	0.59	0.43	0.56	0.56	0.94	0.61	0.73	0.73	0.11	0.09	0.14	Aspm	calmodulin binding protein 1,calmodulin binding protein 1,
12317	140.35	142.59	117.08	153.1	222.59	118.96	141.36	282.96	238.55	215.63	201.6	236.25	272.2	342.36	256.08	307.9	282.53	129.54	150.34	117.88	Calr	calreticulin
12319	6.48	7.72	6.28	8.66	7.84	10.78	9.34	8.97	7.68	7.57	5.4	6.77	3.25	1.75	3.46	2.47	3.37	9.46	7.2	5.67	Car8	carbonic anhydrase-like
12321	90.58	100.07	90.85	109.69	125.75	157.63	158.8	87.3	134.77	125.39	81.53	142.1	172.88	261.65	181.11	224.15	189.57	105.75	100.65	89.88	Calu	calumenin isoform 1
12322	8.16	10.37	8.31	9.95	14.53	7.71	8.38	7.15	5.5	7.86	9.54	9.66	7.62	6.92	6.68	4.38	3.94	15.58	18.2	17.34	Camk2a	calcium/calmodulin-dependent protein kinase II
12323	4.22	4.89	4.53	5.01	5.21	3.07	5.06	4.8	2.95	3.67	3.51	3.22	2.87	2.2	0.54	1.79	1.59	5.06	6.46	6.35	Camk2b	calcium/calmodulin-dependent protein kinase II,,calcium/calmodulin-dependent protein kinase II,,calcium/calmodulin-dependent protein kinase II,,calcium/calmodulin-dependent protein kinase II,,
12325	15.1	17.04	14.02	18.29	14.98	11.75	11.25	25.13	17.55	19.21	16.45	18.08	15.82	21.51	12.34	13.62	13.65	20.34	25.93	23.09	Camk2g	calcium/calmodulin-dependent protein kinase II
12326	0.03	0	0.03	0.02	0.13	0.03	0.13	0	0	0.11	0	0.12	0.1	0.1	0.09	0.11	0.04	0.04	0.08	0	Camk4	calcium/calmodulin-dependent protein kinase IV
12328	5.74	7.97	6.23	7.07	7.85	5.43	6.34	19.63	13.18	14.05	10.57	12.65	12.55	11.75	7.52	12.88	8.89	7.27	8.67	7.43	Caml	calcium modulating ligand
12330	94.47	106.91	102.94	137.58	137.5	143.91	152.53	142.01	197.56	215.92	170.38	241.17	120.07	164.65	142.68	149.32	140.68	108.09	107.54	94.37	Canx	calnexin,calnexin,calnexin,
12331	15.36	19.7	15.91	19.98	21.44	14.82	13.45	26.25	20.67	21.07	21.92	18.53	47.46	50.84	45.86	46.3	45.99	21.78	18.45	17.29	Cap1	CAP, adenylate cyclase-associated protein 1,CAP, adenylate cyclase-associated protein 1,CAP, adenylate cyclase-associated protein 1,CAP, adenylate cyclase-associated protein 1,
12332	5.64	8.26	5.46	6.06	9.05	6.75	7.51	11.65	6.7	6.5	6.39	5.53	70.89	53.81	41.88	43.6	54.84	7.9	7.92	8.86	Capg	gelsolin-like capping protein
12333	7.52	8.42	6.79	8.59	12.42	10.98	10.41	11.25	7.68	9.9	6.82	6.67	13.18	10.41	8.78	8.1	9.15	12.81	16.45	15.12	Capn1	calpain 1,calpain 1,calpain 1,
12334	18.98	27.62	18.26	27.09	36.41	26.72	29.2	32.37	23.33	25.79	21.41	24.16	68.33	66.15	57.48	58.88	59.83	27.68	30.4	32.94	Capn2	calpain 2
12335	3.66	2.88	1.89	4.1	2.53	2.13	2.1	1.86	2.3	2.29	1.76	1.75	1	0.62	0.07	0.19	0.65	4.41	4.47	3.94	Capn3	calpain 3,calpain 3,calpain 3,
12336	137.47	128.71	104.91	167.54	173.15	103.4	115.94	198.08	146.08	176.52	159.48	163.33	166.04	158.22	107.58	121.78	138.03	140.59	172.71	161.42	Capns1	calpain, small subunit 1,calpain, small subunit 1,
12337	0.68	1.01	0.54	0.79	1.17	0.41	0.73	0.94	0.53	0.62	0.67	0.65	2.21	1.79	1.24	1.36	2	1.48	1.11	1.11	Capn5	calpain 5,calpain 5,
12338	0	0.04	0.12	0.08	0	0.02	0.03	0.23	0	0	0	0	0.23	0.13	0.49	0.1	0.38	0	0	0	Capn6	calpain 6
12339	13.34	10.61	17.12	17.26	10.49	14.79	15.01	6.11	15.15	14.54	16.02	17.03	10.31	14.02	15.67	18.99	15.38	9.16	8.37	7.96	Capn7	calpain 7
12340	9.61	16.07	13.01	17.09	18.82	12.52	12.8	26.11	32.06	35.55	40.69	35.77	36.74	43.13	48.88	39.06	47.11	11.55	11.9	12.69	Capza1	capping protein (actin filament) muscle Z-line,
12343	53.69	49.34	58.76	86.99	71.04	93.21	84.92	37.87	64.39	57.96	60.12	71.55	66.9	82.08	90.72	105.45	100.6	41.8	39.54	33.3	Capza2	capping protein (actin filament) muscle Z-line,
12344	0	0	0.04	0	0	0.03	0	0	0	0	0	0	0	0	0	0	0	0	0	0	Capza3	capping protein (actin filament) muscle Z-line,
12345	70.54	77.04	61.01	89.24	96.89	74.19	94.22	155.06	102.13	104.68	82.31	101.98	128.22	138.03	82.97	94.35	107.21	109.71	122.99	110.26	Capzb	capping protein (actin filament) muscle Z-line,,capping protein (actin filament) muscle Z-line,,
12346	0	0.11	0	0	0	0	0	0	0	0	0	0	0	0	0	0	0	0	0	0	Car1	carbonic anhydrase 1
12348	2.01	0.34	2.09	2.54	4.76	2.68	2.94	5.38	2.77	3.23	3.08	2.77	3.61	2.34	3.33	3.35	3.57	4.25	6.06	5.68	Car11	carbonic anhydrase 11
12349	2.19	2.48	1.95	1.38	1.06	0.56	0.89	2.46	1.58	1.5	0.79	1.21	1.48	2.4	1.53	1.29	1.35	1.95	1.39	1	Car2	carbonic anhydrase 2
12350	9.17	7.02	8.32	3.12	4.81	7.14	6.87	9.35	5.34	2.58	4.53	3.11	6.04	3.05	3.39	1.87	4.3	10.4	8.35	3.76	Car3	carbonic anhydrase 3
12351	22.2	16.98	15.75	17.67	8.38	16.8	17.84	12.74	20.2	16.5	19.45	16.36	11.02	11.54	11.37	13.4	8.95	16.39	15.74	19.05	Car4	carbonic anhydrase 4
12352	0	0	0	0.04	0.08	0	0.04	0	0	0	0	0	0	0.08	0.09	0	0.03	0	0	0	Car5a	carbonic anhydrase 5a, mitochondrial
12353	0	0	0	0	0	0	0	0	0	0	0	0	0.15	0	0	0	0.14	0	0	0	Car6	carbonic anhydrase 6
12354	3.42	2.54	1.63	2.79	1.79	1.86	2.15	4.74	3.09	2.94	1.9	2.1	1.2	1.63	0.75	0.28	0.71	4.31	2.8	5.16	Car7	carbonic anhydrase 7,carbonic anhydrase 7,carbonic anhydrase 7,
12355	0.92	0.36	1.28	0.65	1.1	0.69	0.68	1.16	0.77	0.94	0.24	0.71	0.61	0.19	0.44	0.39	0.33	1.04	1.36	0.96	Nr1i3	nuclear receptor subfamily 1, group I, member 3
12359	72.9	87.94	71.52	86.19	55.52	44.22	51.68	76.16	85.38	83.93	83	74.76	96.21	82.54	71.39	74.8	84.21	101.2	95.23	110.25	Cat	catalase
12361	2.31	2.75	1.89	2.47	2.86	2.31	2.48	1.92	2.73	2.67	2.22	3.25	5.96	6.51	7.25	7.87	7.14	2.32	1.63	1.93	Cask	calcium/calmodulin-dependent serine protein,calcium/calmodulin-dependent serine protein,calcium/calmodulin-dependent serine protein,calcium/calmodulin-dependent serine protein,
12362	0.55	1.52	2.45	1.61	2.1	2.49	2.22	0.81	1.28	0.69	1.6	1.16	2.63	5.18	3.49	3.82	4.39	0.86	0.59	1.12	Casp1	caspase 1
12363	0.92	1.14	1.39	2.01	1.63	2.74	1.65	1.68	2.5	2.13	2.1	2.64	4.34	7.21	3.86	7.96	5.36	0.99	1.01	0.62	Casp4	caspase 11,caspase 11,
12364	2.75	3.48	3.73	6.69	8	5.55	5.91	3.39	4.38	5.55	5.71	8.35	8.86	11.83	8.93	12.95	12.01	3.97	2.27	3.41	Casp12	caspase 12,caspase 12,
12366	2.19	4.66	2.16	2.72	3.17	2.02	1.35	2.63	2.62	2.38	3.94	2.39	4.73	3.93	3.51	4.53	5.05	3.05	2.99	4.07	Casp2	caspase 2,caspase 2,
12367	1.13	1.77	1.14	1.94	2.16	2.57	2.4	2.97	3.48	2.78	3.11	2.79	6.49	8.45	8.03	8	7.93	1.51	1	1.95	Casp3	caspase 3,caspase 3,
12368	4.17	8.17	3.85	4.8	4.45	5.43	7.28	5	3.69	4.98	3.96	3.37	8.51	8.25	4.99	7.9	6.96	7.38	7.24	6.75	Casp6	caspase 6
12369	4.91	6.64	4.67	5.06	4.34	3.9	5.11	10.89	3.7	5.44	4.75	5.66	5.63	5.17	1.68	3.86	4.73	4.77	4.63	5	Casp7	caspase 7
12370	5.35	6.91	4.52	4.49	3.84	5.71	6.23	5.47	4.75	4.28	3.97	5.86	12.27	10.39	9.96	12.47	12.03	4.95	4.26	3.6	Casp8	caspase 8
12371	2.83	3.94	3.3	3.31	3.1	1.95	1.47	5.39	2.83	2.15	2.66	2.35	4.72	3.74	3.43	3.28	3.75	4.16	4.44	4.67	Casp9	caspase 9,caspase 9,
12372	52.09	88.57	44.73	84.39	42.58	37	35.05	75.27	60.41	44.58	28.73	44.09	19.5	38.88	20.82	28.19	19.69	73.82	68.81	63.66	Casq1	calsequestrin 1,calsequestrin 1,
12373	276.99	320.24	276.59	335.36	306.54	454.84	444.88	261.79	355.28	283.95	196.54	314	164.23	256.25	193	210.68	163.1	308.49	357.01	277.24	Casq2	calsequestrin 2
12374	0.01	0	0	0	0.02	0	0.01	0	0	0.04	0	0	0	0	0	0	0	0	0	0	Casr	G protein-coupled receptor, family C, group 2,
12380	44.03	49.16	45.73	58.41	64.73	67.12	64.25	52.34	62.03	69.66	56.81	76.85	66.6	93.14	64.05	78.92	75.29	49.26	49.92	49.81	Cast	calpastatin,calpastatin,calpastatin,calpastatin,calpastatin,
12385	113.19	146.53	105.12	146.39	169.53	105.36	107.63	132.89	122.3	117.95	98.37	113.54	180.23	184.08	178.93	133.08	164.38	147.44	154.89	148.54	Ctnna1	catenin alpha 1,catenin alpha 1,
12386	0.07	0.22	0.01	0.01	0.02	0.08	0.02	0.04	0.02	0.08	0.02	0.07	0.1	0.09	0.1	0.04	0.02	0.11	0.04	0	Ctnna2	catenin (cadherin associated protein), alpha 2,catenin (cadherin associated protein), alpha 2,
12387	110.59	147.65	98.4	105.02	72.05	82.66	73.15	121.81	97.76	93.89	86.68	96.47	106.45	89.22	93.95	106.88	93.7	152.34	145.25	144.81	Ctnnb1	catenin (cadherin associated protein), beta 1,,catenin (cadherin associated protein), beta 1,,
12388	13.51	21.48	16.58	22.01	22.47	16.67	16.69	20.66	20.55	20.45	20.44	21.33	25.3	25.51	27.49	20.27	25.46	20.3	20.63	19.55	Ctnnd1	catenin, delta 1 isoform 1
12389	91.11	142.44	83.99	110.65	75.98	56.97	60.26	150.35	86.96	98.89	111.66	101.58	78.86	55.33	87.93	78.61	74.15	132.88	117.25	143.08	Cav1	caveolin, caveolae protein 1,caveolin, caveolae protein 1,
12390	17.7	18.65	14.01	22.54	9.35	10.6	12.48	25.55	20.78	18.38	18.38	20.47	15.24	13.6	3.61	11.38	13.3	24.78	23.43	28.14	Cav2	caveolin 2,caveolin 2,
12391	42.81	46.77	31.48	33.2	32.03	16.71	16.77	37.55	24.09	26.83	32.46	26.31	73.49	108.78	54.47	96.81	64.73	41.41	46.84	46.42	Cav3	caveolin 3
12393	0.31	0.19	0.23	0.34	0.39	0.39	0.27	0.43	0.2	0.12	0	0.27	1.89	1.55	0.32	1.7	1.82	0.2	0.49	0.58	Runx2	runt related transcription factor 2,runt related transcription factor 2,runt related transcription factor 2,
12394	0.25	0.23	0	0.26	0.65	0.11	0.24	1.35	0.19	0.38	0.15	0.41	4.64	3.5	1.52	2.67	2.56	0.25	0.66	0.72	Runx1	runt related transcription factor 1,runt related transcription factor 1,runt related transcription factor 1,runt related transcription factor 1,
12395	0.49	1.65	0.99	1.43	0.94	1.03	1.07	1.6	1.23	1.43	0.48	0.82	0.98	0.54	0.73	0.65	0.92	1.53	1.18	1.47	Runx1t1	CBFA2T1 identified gene homolog,CBFA2T1 identified gene homolog,CBFA2T1 identified gene homolog,
12396	2.64	3.46	2.78	4.47	2.67	2.36	2.65	9.3	6.98	6.41	6.92	8.19	3.28	5.63	3.25	2.89	2.93	4.2	3.68	3.9	Cbfa2t2	core-binding factor, runt domain, alpha subunit,core-binding factor, runt domain, alpha subunit,
12398	4.92	4.49	4.35	6.76	4.29	2.72	3.43	9.66	6.18	5.39	5.71	4.18	4.18	4.44	2.89	2.55	2.89	9.16	9.14	10.68	Cbfa2t3h	core-binding factor, runt domain, alpha subunit,core-binding factor, runt domain, alpha subunit,core-binding factor, runt domain, alpha subunit,
12399	0.15	0.11	0.41	0.16	0.22	0.08	0.09	0.75	0.13	0.33	0.22	0.04	0.65	2.11	0.11	0.66	0.74	0.14	0.39	0.3	Runx3	runt related transcription factor 3,runt related transcription factor 3,
12400	8.65	8.22	11.88	13.92	18.41	7.51	9.88	18.72	21.07	22.88	11.18	14.78	21.13	27.27	14.99	16.17	17.75	13.81	14.83	15.01	Cbfb	core binding factor beta
12401	0	0	0	0	0	0	0	0	0	0	0	0	0	0.09	0	0	0	0	0	0	Serpina6	serine (or cysteine) proteinase inhibitor, clade
12402	1.34	3.1	2.75	3.6	3.55	2.55	2.87	3.69	3.31	2.81	3.66	3.07	5.79	5.33	5.43	3.23	5.71	3.07	2.14	2.77	Cbl	Casitas B-lineage lymphoma
12404	0.94	0.24	0.45	0.15	0.16	0.12	0.19	0.09	0	0	0	0	0	0.21	0	0	0	0	0	0.19	Cbln1	cerebellin 1 precursor protein,cerebellin 1 precursor protein,
12406	72.83	86.25	57.54	71.67	76.8	30.18	36.71	166.67	99.24	80.7	86.73	66.59	115.07	78.25	61.68	70.25	88.75	87.61	110.13	114.68	Serpinh1	serine (or cysteine) proteinase inhibitor, clade,serine (or cysteine) proteinase inhibitor, clade,serine (or cysteine) proteinase inhibitor, clade,serine (or cysteine) proteinase inhibitor, clade,
12408	19.91	19.73	13.28	24.07	27.85	19.75	22.56	24.67	14.63	14.76	12.72	16.17	8.93	7.1	6.47	4.35	7.59	23.89	24.29	25.57	Cbr1	carbonyl reductase 1
12409	12.48	18.3	11.62	13.52	12.27	8.15	9.89	22.72	12.14	11.06	10.06	10.12	35.09	23.62	26.77	21.25	28.39	14.71	14.83	17.02	Cbr2	carbonyl reductase 2
12411	0.06	0	0.03	0.09	0.02	0.03	0.04	0.04	0	0.1	0.24	0.13	0.09	0.04	0	0	0.07	0	0	0.04	Cbs	cystathionine beta-synthase isoform 2,cystathionine beta-synthase isoform 2,
12412	26.48	31.2	25.3	28.78	37.81	48.49	49.68	19.98	22.47	25.6	30.81	29.81	20.63	13.45	18.06	15.09	18.45	20.51	18.44	16.15	Cbx1	chromobox homolog 1,chromobox homolog 1,chromobox homolog 1,
12416	0.92	1.09	0.85	0.9	1.61	0.88	0.94	1.12	0.41	0.75	0.95	0.41	1.02	0.65	0.19	0.92	0.76	1.85	1.17	1.46	Cbx2	chromobox homolog 2
12417	35.11	34.97	30.13	29.57	25.62	18.98	17.21	19.36	18.98	14.76	23.69	18.53	38.56	36.29	29.79	36.09	41.47	28.11	30.06	23.78	Cbx3	chromobox homolog 3
12418	3.62	2.52	3.28	3.63	8.4	2.9	4.46	6.59	3.76	3.24	2.33	2.19	8.51	6.11	4.52	5.56	4.99	4.39	6.72	6.02	Cbx4	chromobox homolog 4,chromobox homolog 4,
12419	12.07	19.63	15.96	30.93	27.76	28.96	34.08	12.46	16.24	18.57	11.21	21.66	14.93	22.36	25.77	17.57	17.13	14.4	8.31	9.6	Cbx5	chromobox homolog 5,chromobox homolog 5,
12421	7.15	8.07	9.49	11.39	6.24	7.53	7.91	7.17	15.94	15.3	11.01	19.91	11.06	15.15	19.32	16.4	16.31	8.33	6.62	7.05	Rb1cc1	RB1-inducible coiled-coil 1,RB1-inducible coiled-coil 1,
12424	0	0	0	0	0.09	0	0	0	0	0	0	0	0	0	0	0	0	0	0.3	0.16	Cck	cholecystokinin
12425	0	0	0	0	0.04	0	0	0.08	0	0	0	0	0	0	0	0	0	0	0	0	Cckar	cholecystokinin A receptor
12426	0	0	0	0	0	0	0	0	0	0	0	0	0	0.04	0	0	0	0	0	0	Cckbr	cholecystokinin B receptor
12428	0.32	1.65	0.69	1.15	0.73	1.34	0.76	0.67	1.48	1.34	0.78	1.38	3.96	5.58	3.13	5.2	5.22	1.14	0.34	1.77	Ccna2	cyclin A2
12442	0.43	1.5	0.42	0.69	1.01	0.62	0.89	2.92	0.74	2.4	1.65	1.69	3.57	3.29	8.85	4.94	3.89	0.38	0.47	1.81	Ccnb2	cyclin B2
12443	8.77	14.54	8.5	15.66	13.39	5.13	6.21	24.17	11.06	12.17	12.35	10.2	12.1	16.47	9.35	6.73	9.9	15.98	15.78	24.24	Ccnd1	cyclin D1
12444	12.81	24.72	13.66	19.86	19.87	23.11	24.58	25.62	19.43	16.15	15.52	14.07	13.06	10.09	10.61	9.35	11.04	29.22	27.21	28.82	Ccnd2	cyclin D2
12445	24.24	22.83	20.91	22.72	24.27	19.82	19.33	45.13	27.63	24.24	25.45	17.45	31	24.24	17.89	16.05	23.05	40.76	45.38	48.21	Ccnd3	cyclin D3
12447	0.55	0.61	0.14	0.57	0.45	0.29	0.53	0.97	0.27	1.34	1.53	0.68	2.17	2.02	1.37	1.48	1.82	1.44	0.77	1.3	Ccne1	cyclin E1
12448	0.73	0.59	1.41	1.51	1.64	2	1.5	1.01	2.33	1.54	1.72	2.07	0.53	1.77	5.79	2.25	1.73	0.48	1	0.4	Ccne2	cyclin E2 isoform 2
12449	0.07	1.39	0.18	0.38	0.35	0.39	0.54	1.21	0.91	0.63	0.48	0.64	1.22	1.73	0.81	0.57	0.96	0.43	0.24	0.74	Ccnf	cyclin F,cyclin F,cyclin F,cyclin F,cyclin F,cyclin F,
12450	210.82	255.72	253.74	409.63	341.45	286.59	360.14	239.29	297.13	388.4	316.31	455.56	100.15	148.13	107.95	141.44	120.81	259.39	227	200.23	Ccng1	cyclin G1
12452	8.4	8.18	7.2	8.91	5.99	5.33	5.89	7.89	7.47	9.59	7.71	9.88	8.24	7.62	10.3	5.34	9.14	10	9.81	9.63	Ccng2	cyclin G2,cyclin G2,
12453	82.1	85.77	95.88	78.23	74.69	88.14	82.56	63.94	66.47	58.04	59.31	65.76	58.7	56.8	58.44	59.45	59.48	97.85	95.58	82.38	Ccni	cyclin I
12454	10.73	11.69	12.68	14.23	18.13	11.18	15.08	21.97	18.48	18.76	21.14	17.09	14.2	19.97	12.41	16.27	14.35	14.37	16.78	14.34	Ccnk	cyclin K
12455	6.21	6.2	6.67	6.89	6.56	6.33	6.12	20	14.72	16.86	16.2	16.64	7.08	8.99	6.71	9.75	6.67	6.53	6.76	7.31	Ccnt1	cyclin T1
12457	8.7	10.66	11.06	14.64	13.57	6.85	10.51	23.6	19.52	12.94	13.88	12.79	13.65	9.49	12.47	4.01	11.17	24.82	26.44	25.79	Ccrn4l	CCR4 carbon catabolite repression 4-like,CCR4 carbon catabolite repression 4-like,
12458	0.03	0	0	0.09	0	0.08	0	0	0	0	0	0.08	0.07	0.19	0.25	0.11	0.1	0.14	0	0	Ccr6	chemokine (C-C motif) receptor 6,chemokine (C-C motif) receptor 6,chemokine (C-C motif) receptor 6,chemokine (C-C motif) receptor 6,chemokine (C-C motif) receptor 6,
12460	15.8	10.58	12.99	17.22	18.23	35.87	33.35	23.84	17.15	15.5	16.58	13.6	13.85	11.69	10.61	9.72	10.95	16.42	19.18	18.59	Ccs	copper chaperone for superoxide dismutase
12461	60.77	60.59	53.17	69.47	53.73	45.73	42.19	94.53	80.52	89.23	66.05	93.23	83.75	106.66	81.31	109.31	80.38	67.03	64.37	66.28	Cct2	chaperonin subunit 2 (beta)
12462	57.63	58.79	48.64	65.65	78.69	71.83	68.95	88.53	75.6	82.05	67.1	82.71	83.97	103.52	79.64	99.97	83.92	60.23	73.66	62.48	Cct3	chaperonin subunit 3 (gamma),chaperonin subunit 3 (gamma),
12464	52.96	36.61	58.65	54.13	38.58	52.45	47.97	49.68	44.74	49.1	63.71	60.61	64.54	61.69	70.39	87.86	79.63	52.16	51.08	44.31	Cct4	chaperonin subunit 4 (delta),chaperonin subunit 4 (delta),
12465	57.22	60.81	52.73	69.35	50.22	51.7	49.23	87.59	69.46	78.22	56.57	78.41	84.34	98.46	66.61	97.25	82.36	65.19	77	65.55	Cct5	chaperonin subunit 5 (epsilon)
12466	40.3	34.94	38.39	46.95	47.77	45.9	43.62	48.56	48.56	54.41	40.59	56.22	52.64	72.85	62.63	71.09	57.32	40.14	44.13	38.24	Cct6a	chaperonin subunit 6a (zeta)
12467	0.03	0.1	0.11	0.11	0.05	0.1	0.14	0	0.09	0.05	0.07	0.17	0.06	0.04	0	0.07	0.17	0.17	0.07	0.08	Cct6b	chaperonin subunit 6b (zeta)
12468	77.83	73.35	69.33	79.02	77.61	74.06	69.82	118.6	82.72	86.86	83.97	87.57	81.19	83.07	59.19	78.36	80.18	85.77	98.28	87.5	Cct7	chaperonin subunit 7 (eta)
12469	65.17	66.95	57.74	71.55	61.75	76.63	66.48	48.68	72.07	71.36	58.22	78.59	84.09	127.84	98.85	130.22	101.32	57.45	59.07	45.66	Cct8	chaperonin subunit 8 (theta)
12475	3.03	2.85	2.82	2.37	3.06	1.67	2.07	7.07	4.09	3.65	4.38	2.89	39.16	36.88	14.84	23.69	29.35	3.25	3.37	3.52	Cd14	CD14 antigen
12476	114.6	122.05	97.87	147.13	112.63	118.59	127.14	193.07	136.06	157.09	110.39	129.75	161.57	177.01	124.53	128.31	137.3	147.09	153.57	170.85	Cd151	CD151 antigen,CD151 antigen,
12477	2.46	0.98	1.34	1.58	0.68	0.73	0.68	0.17	0.53	0.98	0.22	0.9	0.46	0.94	0.55	0.65	0.42	0.78	0.63	1.27	Ctla4	cytotoxic T-lymphocyte-associated protein 4
12478	0.25	0.3	0.11	0.11	0.09	0.14	0.04	0.12	0	0.05	0.03	0.11	0	0	0	0	0.03	0.03	0.18	0	Cd19	CD19 antigen
12479	0.74	1.43	1.1	1.09	0.7	1.5	0.7	0.71	1.1	0.14	0.19	0.36	1.4	0.8	1.74	0.9	1.28	0.74	1.18	0.99	Cd1d1	CD1d1 antigen
12480	0.55	0.93	0.57	0.45	0.22	0.48	0.34	0.38	0.23	0	0.1	0.05	0.51	0.12	0.69	0.24	0.62	0.28	0.56	0.33	Cd1d2	CD1d2 antigen
12481	0	0.27	0.79	0.06	1.17	0	0.13	0.1	0.27	0	0.41	0.07	0.2	0.12	0.62	0.36	0.13	0.17	0.34	0.21	Cd2	CD2 antigen
12482	0	0	0	0.07	0.04	0.13	0.14	0	0	0	0.12	0.16	0	0	0	0	0.03	0.06	0	0.14	Ms4a1	membrane-spanning 4-domains, subfamily A, member,membrane-spanning 4-domains, subfamily A, member,
12483	0.09	0.11	0.14	0.01	0.08	0.05	0	0.04	0.04	0.08	0.05	0.14	0.56	0.62	1.7	0.05	0.76	0.04	0.12	0.08	Cd22	CD22 antigen,CD22 antigen,
12484	1.98	2.53	1.15	0.46	4.03	0.52	0.71	2.2	1.17	0	0	0	11.83	3.71	6.23	6.01	13.14	1.64	1.29	0.84	Cd24a	CD24a antigen
12487	0.93	0.79	1.2	0.95	0.85	0.64	1.19	0.6	0.27	0	0.3	0.28	0.27	1.35	0.28	0	0.32	1.02	0.48	1.48	Cd28	CD28 antigen
12488	4.32	4.56	4.61	7.9	7.05	6.97	7.76	7.93	10.2	12.49	11.8	12.19	6.56	8.4	11.62	11.97	7.77	4.06	3.58	4.11	Cd2ap	CD2-associated protein
12489	0.65	1.11	0.77	0.69	1.4	0.53	0.4	1.03	1.45	0.93	0.74	0.64	8.16	5.32	10.32	8.89	6.9	0.66	1.34	0.92	Cd33	CD33 antigen,CD33 antigen,CD33 antigen,
12490	47.94	58.47	49.66	43.19	47.71	49.25	44.77	47.82	55.69	44.96	45.97	45.31	55.14	54.53	58.98	56.84	60.4	55.21	47.98	38.43	Cd34	CD34 antigen,CD34 antigen,
12491	507.91	474.59	635.67	571.5	369.04	469.73	443.39	219.65	505.28	403.14	388.76	497.47	636.37	742.39	864.6	911.06	841.1	473.36	364.62	347.15	Cd36	CD36 antigen,CD36 antigen,CD36 antigen,CD36 antigen,
12492	37.14	40.14	42.05	41.66	28.4	39.1	42.71	29.8	41.17	35.04	32.11	39.03	77.31	85.27	81.36	83.26	85.06	44.6	41.17	37.23	Scarb2	scavenger receptor class B, member 2
12493	1.35	1.13	0.49	1.14	2.39	1.42	1.45	1.87	0.83	1.02	0.96	0.56	11.93	5.36	4.64	7.25	9.61	1.59	0.52	3.02	Cd37	CD37 antigen,CD37 antigen,CD37 antigen,CD37 antigen,
12494	3.17	3.94	3.6	3.36	3.31	2.35	1.75	3.62	3.57	4.19	2.56	3.44	11.56	9.48	8.73	10.36	12.65	3.79	2.56	3.12	Cd38	CD38 antigen
12495	4.01	3.92	4.22	4.86	5.78	8.64	8.01	4.52	5.34	5.25	3.32	4.96	15.39	15.31	11.19	11.71	14.45	5.63	5.27	4.27	Entpd1	ectonucleoside triphosphate diphosphohydrolase,ectonucleoside triphosphate diphosphohydrolase,
12496	7.83	7.64	8.04	5.42	6.14	4.93	4.78	11.41	7.16	7.2	7.31	6.17	15	11.71	8.37	11.48	13.66	9.43	10.37	11.55	Entpd2	ectonucleoside triphosphate diphosphohydrolase
12497	4.61	8.61	5.69	6.88	6.95	4	3.86	10.31	7.29	8.05	7.86	6.75	3.68	3.76	2.91	3.94	3.25	6.3	7.03	7.3	Entpd6	ectonucleoside triphosphate diphosphohydrolase,ectonucleoside triphosphate diphosphohydrolase,
12499	34.41	43.18	34.68	31.76	36.38	26.11	28.45	32.43	23.82	22.87	24.41	25.23	15.61	18.06	12.66	16.66	14.87	48.25	47.04	45.57	Entpd5	ectonucleoside triphosphate diphosphohydrolase 5
12500	0	0	0	0.29	0.45	0.24	0	0	0	0.17	0.22	0	0	0	0	0.22	0	0	0.24	0	Cd3d	CD3 antigen, delta polypeptide
12501	0.7	0.16	0.17	0.14	0.72	0.38	0.06	0.37	1.3	0	0	0.06	13.59	17.32	6.76	9.08	13.83	0.1	0.57	0.25	Cd3e	CD3 antigen, epsilon polypeptide
12502	0.55	0	0.18	0.14	0.52	0.32	0.2	0.25	0	0.17	0.11	0	0	0	0.51	0	0.11	0.11	0	0	Cd3g	CD3 antigen, gamma polypeptide
12503	0.52	0.32	1.01	0.14	0.29	0	0.37	0.72	0.77	0	0.42	0.7	0	0	0	0	0	0	0	0.24	Cd247	CD247 antigen,CD247 antigen,CD247 antigen,
12504	0	0.44	0.03	0.16	0.1	0.13	0.15	0.21	0.35	0.33	0.11	0.43	0.59	0.47	0.58	0.62	0.42	0.39	0.43	0.21	Cd4	CD4 antigen,CD4 antigen,
12505	1.63	3.57	2.29	2.34	5.69	2.69	2.18	3.61	1.87	2.14	2.87	2.44	45.96	41.55	38.6	49.45	40.36	4.23	3.4	2.88	Cd44	CD44 antigen isoform b,CD44 antigen isoform b,CD44 antigen isoform b,
12506	0.6	1.2	0.53	0.93	1.06	0.9	0.86	0.46	0.32	0.59	0.73	0.54	5.82	2.73	5.97	3.85	6.9	0.84	0.64	0.62	Cd48	CD48 antigen
12507	0.17	0.15	0.08	0.24	0.52	0.15	0.14	0.58	0.58	0.15	0.2	0.48	0	0.26	0	0.2	0.02	0.13	0.07	0.16	Cd5	CD5 antigen
12508	2.23	1.12	1.19	1.98	4.08	1.6	1.75	1.7	2.05	2.09	0.75	1.52	22.45	16.3	40.65	22.74	27.34	1	1.81	0.87	Cd53	CD53 antigen
12509	57.71	52.12	55.94	65.62	52.89	52.06	52.5	42.53	62.41	65	56.51	70.33	49.94	48.63	87.36	80.27	54.37	51.98	52.89	38.44	Cd59a	CD59a antigen
12511	0	0	0.13	0.1	0.09	0.1	0.05	0.03	0.07	0.04	0	0.04	0.02	0.14	0	0.03	0.01	0.13	0.09	0.06	Cd6	CD6 antigen isoform 2,CD6 antigen isoform 2,
12512	109.22	71.92	73.57	81.78	157.37	295.1	262.13	113.84	104.11	98.78	96.56	93.86	301.67	237.27	237.47	274.31	308.46	96.17	101.14	81.45	Cd63	Cd63 antigen
12514	4.28	4.67	3.29	4.42	8.67	5.07	5.21	11.9	6.51	5.29	6.42	5.92	98.96	73.44	82.41	59.72	86.2	5.37	7.31	6.77	Cd68	CD68 antigen,CD68 antigen,
12515	0.23	0.27	0	0	0.12	0	0.11	0	0	0	0.36	0	0.33	0	1.04	0	0.26	0	0.1	0.11	Cd69	CD69 antigen
12516	0	0.12	0.13	0.1	0.16	0.11	0.18	0.27	0.1	0	0	0.13	0	0.1	0	0.08	0.08	0.15	0.08	0	Cd7	CD7 antigen
12517	0.1	0.81	0.43	0.19	0.64	0.17	0.17	0.54	0.22	0.35	0	0.32	0.48	0.38	0.32	0.47	0.43	0.17	0.19	0.07	Cd72	CD72 antigen,CD72 antigen,CD72 antigen,CD72 antigen,
12518	0.07	0.36	0.25	0.3	0.21	0.17	0.23	0.45	0.29	0.24	0.08	0.43	0	0.31	0.54	0.24	0.08	0.39	0.17	0.18	Cd79a	CD79A antigen (immunoglobulin-associated alpha)
12519	0.3	0.08	0.5	0.26	0.31	0.3	0.46	0.53	0.7	0.62	0	0.87	1.25	1.4	1.46	0.98	1.6	0.25	0.22	0.3	Cd80	CD80 antigen precursor,CD80 antigen precursor,
12520	235.01	258.32	202.97	202.58	242.65	152.14	225.82	327.65	212.7	163.61	197.44	156	248.72	164.95	193.42	199.61	206.38	289	287.54	281.59	Cd81	CD 81 antigen
12521	8.27	6.48	4.63	7.11	9.74	3.35	4.54	6.79	6.43	5.55	7.67	5.78	10.9	14.61	13.7	10.17	10.1	8.81	9.68	11.84	Cd82	CD82 antigen,CD82 antigen,CD82 antigen,
12522	1.3	1.4	2.3	0.48	0.94	0.47	0.98	4.36	0.91	1.25	0.75	1.46	1.67	0.72	0.57	0.28	1.03	0.99	1.2	1.84	Cd83	CD83 antigen
12523	0.09	0.23	0.41	0.33	1.01	0.56	0.7	0	0.57	0.23	0.68	0.34	12.69	8.75	28.58	13.4	20.58	0.15	0.22	0.48	Cd84	CD84 antigen,CD84 antigen,CD84 antigen,
12524	0.18	0.56	0.9	0.48	0.75	0.46	0.38	1.41	0.85	0.08	0.32	1.1	3.45	3.1	3.35	3.48	3.89	0.36	0.58	0.44	Cd86	CD86 antigen
12525	0.06	0	0.11	0	0.56	0	0.16	0.08	0	0	0	0	0	0	0	0.21	0	0	0.3	0	Cd8a	CD8 antigen, alpha chain
12526	0.07	0	0	0	0.23	0	0	0.2	0	0	0	0	0	0	0.13	0	0	0	0	0	Cd8b1	CD8 antigen, beta chain 1
12527	12.65	16.99	12.49	20.92	14.41	11.12	12.92	31.95	24.96	22.22	16.64	21.59	39.47	48.02	29.64	25.66	35.2	26.45	27.53	26.16	Cd9	CD9 antigen
12530	1.28	1.2	2	1.41	1.63	1.11	1.27	2.64	2.31	2.61	1.64	2.79	2.51	3.71	2.54	1.48	2.85	1.81	1.67	2.21	Cdc25a	cell division cycle 25 homolog A,cell division cycle 25 homolog A,
12531	0.48	1.76	0.59	1.1	1.73	1.45	1.12	1.69	2.48	1.34	2.31	1.29	2.65	4.01	3.3	3.74	2.76	1.55	1.97	2.36	Cdc25b	cell division cycle 25 homolog B,cell division cycle 25 homolog B,
12532	0	0.07	0.24	0.08	0.03	0.12	0.03	0.3	0.11	0.13	0.13	0.12	0.43	0.67	0.36	0.52	0.51	0.09	0.05	0.1	Cdc25c	cell division cycle 25 homolog C
12534	0.84	1.88	0.62	1.03	0.64	1.15	1.12	2.72	1.24	0.54	0.9	1.1	7.37	6.13	3.27	7.33	8.41	1.22	0.39	2.64	Cdc2a	cell division cycle 2 homolog A
12537	30.28	26.01	20.51	32.19	42.9	37.9	42.56	31.06	26.59	31.66	25.04	31.12	33.67	42.8	29.96	39.12	33.08	26.44	25.76	24.72	Cdc2l1	cell division cycle 2-like 1,cell division cycle 2-like 1,cell division cycle 2-like 1,
12539	102.05	93.85	61.13	128.21	147.63	122.07	129.66	162.56	106.54	130.76	93.86	108.42	70.56	92.27	55.24	63.6	56.29	119.25	143.67	150.44	Cdc37	cell division cycle 37 homolog,cell division cycle 37 homolog,
12540	72.24	71.88	95.16	89.1	98.87	101.79	141.07	86.17	90.41	95.64	108.24	112.68	153.14	172.33	201.42	222.94	196.4	74.75	72.82	69.49	Cdc42	cell division cycle 42 homolog,cell division cycle 42 homolog,cell division cycle 42 homolog,
12544	0.92	2.41	1.25	1.54	1.54	1.52	1.69	2.24	1.46	1.43	0.76	2.29	2.04	4.01	1.98	1.48	2.1	1.94	1.76	1.44	Cdc45l	cell division cycle 45 homolog (S.,cell division cycle 45 homolog (S.,
12545	0.22	0.89	0.21	0.53	0.77	1.01	0.75	0.94	0.32	0.53	0.5	0.27	1.32	0.87	0.83	0.53	1.18	0.52	0.54	0.89	Cdc7	cell division cycle 7,cell division cycle 7,cell division cycle 7,
12549	6.75	12.56	7.33	9.87	10.73	7.68	8.82	12.29	11.72	10.24	9.43	9.86	12.39	13.81	11.11	9.91	10.69	13.76	12.96	11.34	Cdgap	Cdc42 GTPase-activating protein
12550	0.03	0	0	0.02	0	0	0	0.04	0	0.03	0	0.03	0.25	0.14	0.18	0.24	0.16	0	0	0	Cdh1	cadherin 1
12552	3.71	6.47	4.78	4.76	6.19	12.88	11.66	5.29	8.68	9.54	8.47	10.08	9.36	13.96	12.44	11.4	10.16	3.19	4.74	3.28	Cdh11	cadherin 11,cadherin 11,
12554	44.33	48.09	37.05	51.36	28.8	28.23	31.8	43.69	40.13	39.62	34.06	38.62	33.09	36.85	30.33	28.91	27.65	60.39	58.99	74.75	Cdh13	cadherin 13,cadherin 13,cadherin 13,
12555	0.07	0	0.05	0.03	0	0.04	0.02	0.07	0.05	0	0.04	0.02	0	0	0	0	0	0.02	0.16	0.05	Cdh15	cadherin 15
12556	0.12	0.03	0.03	0.08	0.08	0.06	0.02	0.09	0	0	0	0.01	0.04	0.26	0.09	0.18	0.1	0.2	0.09	0.1	Cdh16	cadherin 16,cadherin 16,
12557	0	0	0.05	0.03	0.08	0.03	0.1	0	0.05	0.03	0	0.07	0.02	0.08	0.08	0.18	0.09	0.1	0.2	0.05	Cdh17	cadherin 17,cadherin 17,
12558	82.04	103.1	85.1	92.21	79.77	71.39	69.62	62.38	81.24	71.05	67.07	72.16	129.47	130.54	122.65	114.46	129.45	101.56	100.45	106.32	Cdh2	cadherin 2
12560	0	0	0	0	0	0	0	0	0.05	0	0	0.01	0.89	0.58	1.17	0.64	0.69	0	0	0	Cdh3	cadherin 3 isoform b
12561	1.29	1.04	1.59	2.55	2.02	1.47	1.41	1.05	0.91	1.46	1.12	1.49	0.78	0.8	0.53	0.42	0.49	1.74	2.33	2.77	Cdh4	cadherin 4
12562	37.03	59.89	40.69	51.75	41.29	70.39	73.59	64.17	54.59	58.82	48.22	56.29	44.85	48.92	32.59	36.33	38.51	60.92	59.1	62.91	Cdh5	cadherin 5
12563	0.16	0.03	0.11	0.33	0.21	0.18	0.25	0.29	0.26	0.14	0.25	0.05	0.57	0.53	0.18	0.14	0.48	0.08	0.19	0.14	Cdh6	cadherin 6
12564	0	0.19	0.04	0.03	0	0.04	0.03	0	0	0.07	0	0	0.02	0	0	0	0.01	0	0	0.06	Cdh8	cadherin 8 isoform 2
12566	4.7	5	4.03	4.13	3.5	2.85	2.82	5.35	3.19	4.88	3.21	3.06	7.28	5.42	9.14	5.4	7	6.63	6.52	5.52	Cdk2	cyclin-dependent kinase 2 isoform 2,cyclin-dependent kinase 2 isoform 2,
12567	24.49	26.28	24.02	23.25	23.06	19.6	20.2	39.42	28.38	24.72	20.18	21.66	27.89	27.23	19.01	19.14	24.61	31.52	37.35	40.97	Cdk4	cyclin-dependent kinase 4
12568	14.53	14.21	12.46	13.52	19.03	11.28	15.59	15.6	10.9	9.96	17.32	10.02	20	12.14	13.17	9.69	19.03	15.16	18.79	19.71	Cdk5	cyclin-dependent kinase 5
12569	0.18	0	0.24	0.19	0.38	0.22	0.23	0.55	0.42	0.39	0.09	0.42	0.39	0.39	0.07	0	0.1	0.68	0.28	0.3	Cdk5r1	cyclin-dependent kinase 5, regulatory subunit
12570	0	0	0	0	0	0	0	0	0	0.11	0	0.04	0	0.09	0	0	0	0	0	0	Cdk5r2	cyclin-dependent kinase 5, regulatory subunit 2
12571	1.3	2.29	1.72	1.54	1.79	0.98	1.08	2.34	1.67	1.49	2.21	0.97	4.14	3.85	2.28	1.68	2.13	1.43	0.79	2.2	Cdk6	cyclin-dependent kinase 6,cyclin-dependent kinase 6,
12572	8.18	9.09	5.47	7.48	9.62	5.38	7.81	11.19	10.52	13.82	22.91	12.92	9.38	9.19	8.22	7.64	10.56	7.79	9.09	8.89	Cdk7	cyclin-dependent kinase 7 (homolog of Xenopus
12575	12.99	6.53	17.57	12.65	14.57	11.14	12.13	98.07	62.06	73.65	55.91	46.06	70.11	111.88	39.27	57.18	49.37	9.81	9.25	11.31	Cdkn1a	cyclin-dependent kinase inhibitor 1A (P21),cyclin-dependent kinase inhibitor 1A (P21),
12576	16.93	20.45	13.28	17.58	29.01	19.76	18.77	25.21	18.74	20.31	17.77	15.3	19.76	16.33	14.8	10.11	15.02	24.69	29.1	26.8	Cdkn1b	cyclin-dependent kinase inhibitor 1B,cyclin-dependent kinase inhibitor 1B,
12577	16.11	7.06	3.44	19.98	5.49	7.55	11.24	13.84	6.68	6.43	14.5	4.66	3.85	2.01	4.17	9.77	2.45	16.34	14.31	10	Cdkn1c	cyclin-dependent kinase inhibitor 1C (P57),cyclin-dependent kinase inhibitor 1C (P57),cyclin-dependent kinase inhibitor 1C (P57),
12579	0.1	0	0	0.23	0.32	0	0.07	1.37	2.92	0.9	1.68	0.45	0	0.15	0	0.36	0.52	0.23	0.39	0.7	Cdkn2b	cyclin-dependent kinase inhibitor 2B (p15,
12580	5.33	6.8	3.96	5.06	6.71	4.82	4	10.31	4.11	4.5	4.53	4.67	9.51	8.77	8.91	9.65	10.12	7.66	7.72	6.7	Cdkn2c	cyclin-dependent kinase inhibitor 2C,cyclin-dependent kinase inhibitor 2C,
12581	8.55	7.9	5.78	10.04	13.89	8.03	6.19	13.63	11.06	11.41	9.27	7.71	12.98	17.37	7.59	13.69	10.97	13.53	15.17	15.25	Cdkn2d	cyclin-dependent kinase inhibitor 2D,cyclin-dependent kinase inhibitor 2D,
12583	5.01	3.23	3.64	4.51	5.2	4.16	4.04	4.08	5.67	2.94	1.34	2.47	10.8	8.62	5.65	7.95	8.49	7.64	4.52	3.85	Cdo1	cysteine dioxygenase 1, cytosolic
12585	3.26	6	3.42	5.11	4.59	3.95	3.54	5.89	5.1	6.79	3.15	5.71	12.63	15.8	11.45	13.97	11.46	4.76	4.75	5.36	Cdr2	cerebellar degeneration-related 2
12587	0.12	0	0	0.47	0.39	0.63	0.34	1.17	1.07	1.1	1.03	0.48	0.26	0	0	0	0.07	0.28	0	0.17	Mia1	melanoma inhibitory activity 1
12589	12.32	13.96	10.55	15.27	8.21	9.72	9.05	5.36	7.75	5.78	5.15	6.6	3.29	3.34	2.71	3.34	3.76	11.68	12.34	10.89	Ift81	carnitine deficiency-associated gene expressed,carnitine deficiency-associated gene expressed,
12591	0.04	0	0	0	0	0.07	0.14	0.16	0.06	0.07	0.23	0.05	0.21	0.12	0.35	1.44	0.11	0.09	0.05	0.11	Cdx2	caudal type homeo box 2
12592	0.09	0	0	0	0	0	0	0	0.06	0	0.31	0.36	0	0	0	0.21	0	0	0	0	Cdx4	caudal type homeo box 4
12593	2.14	2.58	2.47	3.1	2.99	4.9	3.97	4.04	4.48	2.19	2.19	2.68	3.86	4.47	4.23	4.61	3.22	3.46	2.88	3.21	Cdyl	chromodomain protein, Y chromosome-like,chromodomain protein, Y chromosome-like,chromodomain protein, Y chromosome-like,
12606	0.64	0.56	0.41	0.82	2.55	0.66	1.13	3.47	1.67	1.05	1.52	0.68	10.28	12.04	2.43	1.59	6.04	1.73	2.11	3.1	Cebpa	CCAAT/enhancer binding protein alpha
12607	7.12	5.8	7.25	10.86	9.72	9.88	11.68	8.26	9.39	10.19	12.03	12.75	9.23	13.94	7.19	12.93	11.12	7.19	7.45	6.15	Cebpz	CCAAT/enhancer binding protein zeta
12608	7.08	1.77	6.79	15.57	18.28	3.49	4.43	36.19	23.55	20.14	14.14	9.29	35.85	31.56	7.44	9.85	24.88	35.54	49.05	45.02	Cebpb	CCAAT/enhancer binding protein beta
12609	7.03	1.06	9.49	7.52	13.06	3.55	4.65	32	20.36	23.83	24.47	11.44	39.17	37.64	13.56	16.54	22.33	16.9	18.67	22.39	Cebpd	CCAAT/enhancer binding protein delta
12611	8.7	15.6	11.54	14.02	12.72	12.98	12.88	15.64	12.2	13.29	11.04	10.35	19.06	12.97	10.58	11.48	15.88	14.04	14.95	15.29	Cebpg	CCAAT/enhancer binding protein gamma
12613	0	0	0	0	0	0	0	0	0.03	0	0	0	0	0	0	0	0.01	0.08	0	0	Cel	carboxyl ester lipase
12614	0.71	1.3	1.19	1.46	1.61	0.82	1.22	1.26	1.01	1.02	0.58	0.67	0.87	0.83	0.4	0.53	0.64	1.56	1.69	1.61	Celsr1	cadherin EGF LAG seven-pass G-type receptor 1,cadherin EGF LAG seven-pass G-type receptor 1,
12615	29.13	38.23	23.57	30.56	28.18	12.44	15.09	36.02	15.85	15.72	16.98	14.07	15.29	10.7	11.68	12.7	11.13	35.48	35.21	46.55	Cenpa	centromere protein A
12616	78.1	62.59	58.01	101.87	106	126.82	134.9	87.25	52.74	70.76	67.73	60	77.43	77.63	54.55	65.36	64.8	78.35	89.38	92.97	Cenpb	centromere protein B
12617	2.06	2.39	1.98	2.8	2.37	2.74	2.94	1.9	2.44	2.73	1.85	2.87	3.51	5.35	5.49	4.89	4.22	1.6	1.65	0.98	Cenpc1	centromere protein C1
12623	0.34	0.34	0.43	0.43	0.02	0.21	0.07	0.07	0.39	0.19	0.32	0.23	0.03	0	0	0.1	0.01	0.22	0.17	0.37	Ces1	carboxylesterase 1
12626	26.39	18.46	22.64	35.45	33.77	27.37	28.22	15.92	24.49	34.01	22.91	33.2	34.44	41.58	47.68	40.91	43.3	19.73	17.41	14.14	Cetn3	centrin 3
12628	26.42	23.75	43.06	53.32	39.16	49.25	44.72	14.9	55.26	56.67	38.93	68.74	83.09	109.14	153.21	117.67	144.45	23.75	21.81	14.8	Cfh	complement component factor H,complement component factor H,
12630	0.05	0.04	0	0.07	0.21	0.12	0.1	0.1	0	0.13	0.4	0.22	4.56	2.96	3.77	2.25	4.67	0.17	0.09	0.23	Cfi	complement component factor i
12631	125.66	150.39	97.96	114	99.07	161.22	153.94	229.81	155.19	156.62	140.54	150.69	477.84	407.13	352.82	459.08	409.75	108.9	119.57	119.81	Cfl1	cofilin 1, non-muscle
12632	104.96	95.42	105.75	154.22	139.74	121.76	100.82	63.52	148.35	143.22	133.14	168.3	212.92	243.19	273.13	265.17	284.65	90.43	65.83	59.79	Cfl2	cofilin 2, muscle
12633	3.39	7.53	4.86	8.88	5.24	6.01	5.09	5.41	10.36	8.55	7.79	8.35	6.16	7.93	14.91	14.47	8.3	7.3	6.64	5.2	Cflar	CASP8 and FADD-like apoptosis regulator isoform,CASP8 and FADD-like apoptosis regulator isoform,
12638	0	0	0	0.01	0	0	0	0	0	0	0	0	0	0.06	0	0.03	0.04	0	0	0	Cftr	cystic fibrosis transmembrane conductance
12642	0.3	0.54	0.18	0.26	0.74	0.03	0.13	5.43	2.08	2.28	2.34	2.05	3.82	3.87	2.26	3.41	2.94	0.26	0.29	0.31	Ch25h	cholesterol 25-hydroxylase
12643	1.28	1.44	2.26	0.96	0.5	1.71	1.68	2.36	1.8	1.01	0.6	1.16	0.53	0.72	0.09	0.12	0.61	2.48	2.83	1.76	Chad	chondroadherin
12648	2.99	5.06	4.02	5.95	5.16	5.09	5.57	3.97	6.71	6.23	5.63	7.63	7.59	13.52	9.07	12.09	8.72	4.29	4.04	3.86	Chd1	chromodomain helicase DNA binding protein 1,chromodomain helicase DNA binding protein 1,chromodomain helicase DNA binding protein 1,
12649	0.41	0.17	0.18	0.34	0.36	0.49	0.29	0.48	0.28	0.23	0.23	0.48	0.45	1.33	0.23	0.92	0.72	0.37	0.08	0.13	Chek1	checkpoint kinase 1 homolog,checkpoint kinase 1 homolog,
12651	21.85	19	23	25.06	20.75	13.15	19.45	24.69	20.54	22.05	15.95	22.03	27.23	36.13	21.49	30.37	27.03	26.04	26.04	26.22	Chkb	choline kinase beta
12652	0.14	0.26	0.08	0	0.07	0.05	0.02	0.04	0	0.1	0.04	0	0.16	0.09	0.08	0	0.08	0.1	0.15	0.12	Chga	chromogranin A
12653	0.26	0.03	0.15	0.41	0.48	0.33	0.44	0.21	0.1	0.28	0.38	0.27	0.26	0.64	0.65	0.08	0.35	0.24	0.13	0.14	Chgb	chromogranin B
12654	1.16	0.85	0.34	0.78	1.92	0.64	0.41	0.8	0.8	1.26	1.27	1.12	11.96	7.3	6.08	6.75	9.59	0.55	0.51	0.76	Chi3l1	chitinase 3-like 1
12655	0	0	0	0	0.03	0	0	0	0.17	0	0	0	43.07	55.42	40.98	83.71	55.69	0	0.1	0	Chi3l3	chitinase 3-like 3
12659	0.32	0.32	0.43	0.33	0.32	0.52	0.56	0.59	0.21	0.45	1.21	0.3	0.96	1.08	0.92	1.7	0.95	0.69	0.37	0.15	Ovgp1	oviductal glycoprotein 1
12660	0.32	0.19	0.1	0.81	2.46	0.55	0.15	2.63	1.25	1.53	0.13	1.17	1.37	1.81	0.68	1.02	1.35	1.24	1.51	2.23	Chka	choline kinase alpha isoform 1,choline kinase alpha isoform 1,
12661	0.07	0.13	0.15	0.2	0.22	0.47	0.36	0.26	0.38	0.44	0.23	0.52	0.34	0.78	0.36	0.32	0.38	0.23	0.17	0.36	Chl1	cell adhesion molecule with homology to L1CAM,cell adhesion molecule with homology to L1CAM,cell adhesion molecule with homology to L1CAM,cell adhesion molecule with homology to L1CAM,cell adhesion molecule with homology to L1CAM,
12662	1.68	2.67	3.59	3.07	3.31	5.52	4.17	1.48	3.9	3.44	3.66	4.37	5.09	3.02	6.89	3.59	5.78	2.95	1.79	1.94	Chm	choroidermia
12663	0.52	1.34	0.76	1.23	1.04	1.17	1.13	0.29	1.31	1.52	1.5	1.19	2.19	1.93	2.22	2.39	2.93	1.09	0.61	0.56	Chml	choroideremia-like
12667	0.25	0.48	0.52	1.56	1.01	0.77	0.83	1.15	1.09	1.45	1.65	0.9	1.39	1.44	0.78	1.02	1.04	1.62	1.24	1.87	Chrd	chordin,chordin,chordin,
12669	0	0	0	0	0	0	0.03	0	0	0	0	0.03	0.05	0.07	0.07	0.06	0.06	0.06	0.06	0	Chrm1	cholinergic receptor, muscarinic 1, CNS,cholinergic receptor, muscarinic 1, CNS,
12671	0.24	0.47	0.11	0.13	0.15	0.32	0.3	0.08	0.41	0	0.04	0.29	0.02	0.17	0	0.11	0.14	0.22	0.36	0.26	Chrm3	cholinergic receptor, muscarinic 3, cardiac
12672	0	0	0	0.02	0.04	0.02	0.03	0.19	0.07	0	0.03	0.07	0.03	0.14	0	0	0.05	0	0.03	0.06	Chrm4	cholinergic receptor, muscarinic 4
12675	8	8.06	8.26	8.88	7.44	6.49	6.22	7.1	9.9	9.13	7.82	10.56	7.42	7.88	7.96	9.47	9.37	7.33	5.83	5.66	Chuk	conserved helix-loop-helix ubiquitous kinase,conserved helix-loop-helix ubiquitous kinase,
12683	18.98	17.26	16.4	19.46	23.3	11.97	13	17.9	16.66	16.43	8.18	14.92	31.24	27.52	16.38	21.8	28.37	23.16	24	22.65	Cidea	cell death-inducing DNA fragmentation factor,
12684	4.01	3.12	2.87	3.37	2.19	3.25	2.9	5.28	3.12	1.79	1.44	2.46	6.5	3.69	2.98	1.12	4.39	3.72	4.64	3.99	Cideb	cell death-inducing DNA fragmentation factor,
12686	0	0	0	0.04	0.08	0	0	0.07	0	0	0	0.03	0	0	0	0	0.03	0	0	0	Elovl3	elongation of very long chain fatty acids-like
12696	46.44	22.79	32.44	54.18	90	44.29	48.49	54.73	51.83	58.91	51	44.45	47.88	73.64	33.1	33.01	34.23	49.45	48.41	53	Cirbp	cold inducible RNA binding protein
12700	32.7	30.39	29.66	13.2	15.67	7.61	11.63	31.78	19.19	18.44	25.18	13.47	31.39	28.51	18.5	26.13	22.16	44.59	28.75	28.63	Cish	cytokine inducible SH2-containing protein
12702	1.64	0.54	0.72	1.75	5.15	0.56	0.56	10.38	9.69	10.8	5.25	7.21	13.14	22.98	9.68	15.58	13.11	1.93	1.75	2.24	Socs3	suppressor of cytokine signaling 3
12703	0.26	0	0	0.33	0.42	0.09	0.15	1.32	0.55	0.86	0.96	0.45	0.63	0.66	0.2	0	0.4	0.25	1.03	1.27	Socs1	suppressor of cytokine signaling 1
12704	0.22	0.74	0.48	0.75	0.63	0.35	0.53	0.79	0.86	0.41	0.55	0.37	0.66	0.92	0.23	0.58	0.57	0.66	0.7	0.69	Cit	citron,citron,citron,citron,
12705	0.35	0.21	0	0.27	0.05	0.1	0	0.57	0.09	0.64	0.14	0.38	0.77	0.28	0.27	0.28	0.58	0.28	0.15	0.33	Cited1	Cbp/p300-interacting transactivator with,Cbp/p300-interacting transactivator with,
12709	35.62	21.59	28.62	32.3	31.84	16.9	21.58	43.11	28.66	23.37	21.18	19.05	44.17	22.8	26.02	16.92	31.28	41.87	45.26	44.77	Ckb	creatine kinase, brain
12715	1072.63	715.31	774.34	1003.87	829.4	523.06	630.63	1258.89	905.46	1013.92	874.32	790.46	201.05	262.18	118.25	201.83	153.39	1140.98	1205.06	1467.95	Ckm	creatine kinase, muscle
12716	10.8	5.19	8.21	6.06	3.63	5.29	4.51	5.54	8.17	5.53	7.12	5.63	4.12	3.17	3.91	2.88	2.72	6.15	5.75	7.12	Ckmt1	creatine kinase, mitochondrial 1, ubiquitous,creatine kinase, mitochondrial 1, ubiquitous,creatine kinase, mitochondrial 1, ubiquitous,
12721	4.28	4.38	3.61	3.46	5.47	1.04	1.36	7.55	4.05	3.35	3.59	2.69	29.22	23.53	21.63	23.19	24.28	2.32	4.87	4.08	Coro1a	coronin, actin binding protein 1A,coronin, actin binding protein 1A,
12722	0.14	0.13	0.13	0.29	0.28	0.21	0.23	0.36	0.4	0.42	0.86	0.39	9.16	7.53	10.21	6.5	9.86	0.37	0.38	0.34	Clca1	chloride channel calcium activated 1
12723	0.91	1.55	1.01	0.81	0.75	0.9	1.05	0.55	0.48	0.88	0.62	0.4	0.05	0.2	0.05	0.23	0.07	1.14	1.51	1.09	Clcn1	chloride channel 1
12724	0.86	1.33	0.85	1.04	0.92	1.31	1.23	1.57	1.43	1.13	0.93	1.05	1.74	0.82	0.92	1.37	1.3	1.59	2.03	1.98	Clcn2	chloride channel 2
12725	7.18	7.56	9.08	10.13	11.13	10.64	9.83	6.66	12.09	12.42	9.8	13.61	6.3	8.38	8.36	6.61	7.82	8.72	9.45	8.23	Clcn3	chloride channel 3 isoform a,chloride channel 3 isoform a,
12727	14.6	19.14	16.27	16.47	14.36	11.66	13.23	17.49	15.03	13.19	10.89	12.8	11.74	12.1	8.74	9.68	10.31	20.43	23.89	22.57	Clcn4-2	chloride channel 4,chloride channel 4,chloride channel 4,chloride channel 4,
12728	0.1	0.72	0.22	0.27	0.14	0.45	0.48	0.36	0.36	0.59	0.08	0.26	1.79	2.68	2.67	1.29	2.1	0.24	0.25	0.27	Clcn5	chloride channel 5
12729	14.84	13.32	11.69	17.56	19.39	17.87	12.72	14.64	18.3	18.5	15.18	17.08	18.93	21.5	15.37	17.24	20.05	18.73	17.03	14.05	Clns1a	chloride channel, nucleotide-sensitive, 1A
12733	0.11	0	0	0.04	0.04	0.04	0.07	0.06	0	0.08	0	0.04	0.22	0.39	0.04	0.33	0.19	0	0	0.03	Clcnka	chloride channel Ka,chloride channel Ka,
12737	0	0.12	0	0.25	0.36	0.06	0.09	0	0	0	0.23	0	0	0	0	0	0	0	0	0	Cldn1	claudin 1
12738	0	0	0	0	0	0	0	0	0	0	0	0	0.05	0	0	0	0.03	0	0	0	Cldn2	claudin 2
12739	0	0	0	0.08	0	0	0	0	0	0	0	0	0	0.16	0	0	0	0	0	0	Cldn3	claudin 3
12740	0	0	0	0	0	0.09	0	0	0	0	0	0	0.12	0.08	0	0.52	0.25	0	0	0	Cldn4	claudin 4
12741	12.05	10.02	8.05	7.25	5.65	3.74	3.58	15.98	8.5	14.97	9.23	8.59	12.92	15.76	7.68	5.85	8.13	8.22	7.7	19.54	Cldn5	claudin 5
12745	0	0	0	0	0.08	0	0.02	0	0	0	0	0	0	0	0	0.06	0	0	0	0	Clgn	calmegin,calmegin,
12748	8.53	9.2	7.54	9.96	10.13	11.78	11.87	16.81	10.44	10.05	9.15	10.86	10.52	13.03	9.02	11.31	8.9	12.14	11.24	11.23	Clk2	CDC-like kinase 2,CDC-like kinase 2,
12750	14.71	11.29	16.03	16.89	17.16	20.57	19.91	11.59	17.48	16.58	19.36	21.3	15.83	16.68	19.37	14.4	21.27	18	14.29	11.89	Clk4	CDC like kinase 4
12751	15.75	21.53	15.02	17.72	15.23	12.78	13.97	40.34	29.45	22.55	22.18	22.15	25.73	16.97	19.57	16.84	23.43	29.98	30.08	27.58	Tpp1	tripeptidyl-peptidase I
12752	2.26	2.57	2.23	2.14	3.73	2.48	2.15	5.24	4.35	3.21	3.72	2.8	7.22	4.71	7.48	2.78	6.05	4.99	3.21	3.41	Cln3	ceroid-lipofuscinosis, neuronal 3,ceroid-lipofuscinosis, neuronal 3,ceroid-lipofuscinosis, neuronal 3,ceroid-lipofuscinosis, neuronal 3,
12753	4.25	8.01	6.08	4.99	4.81	4.89	4.45	5.18	6.34	6.94	5.36	7.06	7.86	9.64	8.11	7.14	8.06	4.35	4.17	4.12	Clock	circadian locomoter output cycles kaput,circadian locomoter output cycles kaput,circadian locomoter output cycles kaput,
12757	63.06	55.51	40.61	77.05	74.7	58.98	51.42	114.74	92.84	95.45	44.99	98.33	115.34	146.44	123.85	95.42	96.04	71.71	64.98	64.22	Clta	clathrin, light polypeptide (Lca) isoform c
12759	330.24	319.2	347.01	343.7	379.26	202.21	208.51	445.75	341.94	369.55	364.75	341.76	740.35	700.67	612.2	611.92	646.88	392.51	438.01	493.2	Clu	clusterin
12763	0.1	0.23	0.39	0.17	0.08	0.24	0.23	0.31	0.48	0.09	0	0.05	0.03	0	0.12	0.34	0.09	0.06	0.1	0.14	Cmah	cytidine monophospho-N-acetylneuraminic acid,cytidine monophospho-N-acetylneuraminic acid,cytidine monophospho-N-acetylneuraminic acid,cytidine monophospho-N-acetylneuraminic acid,cytidine monophospho-N-acetylneuraminic acid,cytidine monophospho-N-acetylneuraminic acid,
12764	15.15	13.14	11.99	16.02	15.66	20.54	16.43	11.79	11.49	11.35	9.86	11.7	15.29	11.86	18.67	13.06	14.8	17.35	18.85	17.23	Cmas	cytidine monophospho-N-acetylneuraminic acid
12765	0.06	0	0.15	0	0.15	0	0.04	0	0.09	0	0	0	0.96	0.86	0.82	0.52	1.44	0.14	0.08	0.09	Il8rb	interleukin 8 receptor beta
12766	0.12	0.11	0.12	0.16	0.29	0.03	0.19	0.13	0.18	0	0	0	0.26	0	0.14	0.26	0.16	0.25	0.16	0.09	Cxcr3	chemokine (C-X-C motif) receptor 3
12767	5.98	6.31	4.32	2.75	2.6	3.03	4.13	3.54	2.49	2.77	1.86	2.13	11.63	7.19	12.18	9.14	10.61	4.37	4.19	5.19	Cxcr4	chemokine (C-X-C motif) receptor 4,chemokine (C-X-C motif) receptor 4,
12768	0.56	0.56	0.18	0.69	0.82	0.72	0.75	0.77	0.73	0.17	0.23	0.3	23.94	14.83	18.78	19.92	26.17	0.18	0.28	0.35	Ccr1	chemokine (C-C motif) receptor 1
12769	0.06	0	0.03	0.02	0.15	0.05	0	0	0.18	0	0	0	0.1	0.09	0	0.07	0.12	0.04	0	0.09	Ccr9	chemokine (C-C motif) receptor 9,chemokine (C-C motif) receptor 9,chemokine (C-C motif) receptor 9,
12770	0	0	0	0	0	0	0	0	0	0	0	0	0.07	0	0	0	0	0	0	0	Ccr1l1	chemokine (C-C motif) receptor 1-like 1
12771	0.06	0	0.09	0	0	0	0	0	0.27	0	0	0	0.33	0	0.4	0.11	0.44	0	0	0.09	Ccr3	CC chemokine receptor 3
12772	0.7	0.54	0.54	0.68	2.08	0.43	0.52	0.24	0.13	0.21	0.82	0.5	4.27	3.71	11.56	5.13	6.51	0.17	0.08	0.08	Ccr2	chemokine (C-C motif) receptor 2,chemokine (C-C motif) receptor 2,
12773	0	0	0	0	0	0	0.02	0	0	0	0	0	0	0	0	0	0	0	0	0	Ccr4	chemokine (C-C motif) receptor 4
12774	0.43	0.56	0.24	0.28	0.42	0.21	0.13	0.64	0.46	0.39	0.87	0.6	2.22	1.83	4.18	3.57	2.86	0	0.08	0.17	Ccr5	chemokine (C-C motif) receptor 5
12775	0.21	0.06	0	0.05	0.17	0.1	0	0.25	0	0	0	0.08	0.2	0.33	0.56	0.29	0.46	0.07	0	0.21	Ccr7	chemokine (C-C motif) receptor 7
12776	0	0	0	0	0.13	0	0	0	0	0	0.15	0.04	0.07	0	0	0	0.04	0	0	0	Ccr8	chemokine (C-C motif) receptor 8
12777	0.53	0.56	0.42	0.5	0.45	0.24	0.35	1.11	0.55	0.34	0.9	0.26	0.3	0.1	0	0.04	0.14	0.88	1.01	1.22	Ccr10	chemokine (C-C motif) receptor 10
12778	48	59.06	50.96	53.82	42.9	36.15	39.77	63.18	47.65	32.82	34.85	32.39	40.75	45.83	26.38	46.02	36.04	77.64	64.9	75.25	Cxcr7	chemokine orphan receptor 1
12780	0	0	0	0	0	0	0	0.03	0.01	0.02	0	0	0.05	0	0	0	0.03	0	0	0	Abcc2	ATP-binding cassette, sub-family C, member 2
12785	141.64	130.5	108.34	136.25	67.1	49.88	47.21	139.77	124.88	122.26	136.17	124.32	136.33	108.32	97.04	117.42	115.1	130.43	136.49	123.56	Cnbp	cellular nucleic acid binding protein,cellular nucleic acid binding protein,cellular nucleic acid binding protein,
12789	0	0.03	0.02	0	0	0	0	0	0.05	0	0	0	0.12	0	1.3	0.04	0.09	0	0	0	Cnga2	cyclic nucleotide gated channel alpha 2
12790	2.76	3.59	2.48	3.08	2.34	2.8	2.59	2.03	1.86	2.02	1.69	1.75	0.93	1.04	0.39	1.03	0.99	3.85	3.44	3.48	Cnga3	cyclic nucleotide gated channel alpha 3
12793	25.45	23.99	26.98	21.21	12.18	9.23	13.02	40.21	43.85	32.5	37.77	32.42	43.98	49.94	33.13	35.5	40.02	28.17	32.76	30.85	Cnih	cornichon homolog
12794	0.11	0	0	0.09	0.74	0.2	0.33	1.1	1.52	0.83	1.11	0.91	0.87	2.13	1.05	4.83	0.27	0.27	0.3	0.8	Cnih2	cornichon homolog 2
12795	1.93	1.72	1.94	1.06	1.26	0.56	0.86	5.1	2.16	3.05	3.46	2.12	4.12	3.71	2.49	2.61	2.85	2.12	2.23	2.94	Plk3	polo-like kinase 3
12796	0.08	0	0	0	0	0	0	0	0	0	0	0	0.18	0	0.16	0	0.1	0	0	0	Camp	cathelicidin antimicrobial peptide
12797	0.98	0.72	0.86	1.41	0.88	1.11	1.29	2.18	0.95	0.89	1.67	1.39	4	2.15	3.68	1.97	3.02	1.74	1.16	1.67	Cnn1	calponin 1
12798	19.53	22.84	19.07	19.69	36.78	19.54	15.39	31.58	23.01	15.21	12.56	12.4	39.52	31.57	25.81	18.45	30.91	27.38	25.01	29.03	Cnn2	calponin 2
12799	5.71	5.6	3.69	7.46	5.79	4.42	5.5	7.73	5.9	5.45	4.18	5.49	6.39	5.26	5.96	7.22	6	5.28	6.49	6.49	Cnp	2',3'-cyclic nucleotide 3' phosphodiesterase,2',3'-cyclic nucleotide 3' phosphodiesterase,2',3'-cyclic nucleotide 3' phosphodiesterase,
12801	0	0	0.09	0	0	0	0	0.06	0	0	0	0	0	0.14	0	0.06	0.01	0	0	0	Cnr1	cannabinoid receptor 1 (brain)
12802	0.13	0.23	0.49	0.07	0.08	0.11	0.25	0.13	0.33	0	0.19	0.12	1.3	0.59	2.72	0.69	1.19	0.15	0.41	0.45	Cnr2	cannabinoid receptor 2,cannabinoid receptor 2,
12803	0.67	0	1.41	0.84	0.63	0.37	0.52	0.92	0.63	0.11	1.18	0.43	2.63	2.27	1.18	3.38	2.71	0.14	0.47	0.85	Cntf	ciliary neurotrophic factor
12804	1.02	1.87	3.35	2.87	3.63	2.56	4.75	3.73	4.55	2.09	1.71	2.1	0.69	3	0.71	0.47	0.75	2.57	4.18	4.52	Cntfr	ciliary neurotrophic factor receptor,ciliary neurotrophic factor receptor,
12805	0	0	0	0.01	0	0.01	0	0	0.08	0	0.09	0	0	0	0	0	0	0	0	0	Cntn1	contactin 1,contactin 1,contactin 1,
12807	1.83	2.28	2.71	1.68	1.99	1.7	1.72	1.44	1.97	2.72	2.63	2.16	5.79	5.13	7.04	6.57	6.6	2.06	2.39	2.12	Hps3	Hermansky-Pudlak syndrome 3 homolog,Hermansky-Pudlak syndrome 3 homolog,Hermansky-Pudlak syndrome 3 homolog,Hermansky-Pudlak syndrome 3 homolog,
12808	0.73	0.8	0.78	0.9	1.29	1.21	1.11	0.9	0.88	0.84	0.64	0.74	0.97	0.94	0.55	0.76	1.05	0.92	1.46	1.14	Cobl	cordon-bleu protein,cordon-bleu protein,cordon-bleu protein,
12810	0.03	0	0.22	0.19	0.2	0.22	0.32	0.52	0.56	0.73	0.36	0.61	0.14	0.27	0	0.24	0.04	0.12	0.2	0.18	Coch	coagulation factor C homolog (Limulus,coagulation factor C homolog (Limulus,
12812	2.07	1.81	1.78	2.05	3.24	2.61	2.89	1.65	1.44	1.02	2.18	1.28	1.59	2.02	1.04	1.31	0.91	1.96	2.34	2.62	Coil	coilin,coilin,
12813	0.07	0	0.03	0.1	0.01	0.03	0.01	0.07	0	0.06	0.14	0.05	0.05	0.08	0.03	0	0.03	0.04	0	0	Col10a1	procollagen, type X, alpha 1
12814	0.1	0.02	0.08	0.13	0.03	0.13	0.13	0.09	0.05	0.07	0.09	0.17	8.21	3.06	12.02	2.66	9.48	0.11	0.07	0	Col11a1	procollagen, type XI, alpha 1
12815	0.68	0.43	0.45	0.64	0.56	0.33	0.54	1.07	0.66	0.43	0.1	0.31	0.36	0.48	0.18	0.36	0.25	0.93	1.01	0.98	Col11a2	procollagen, type XI, alpha 2,procollagen, type XI, alpha 2,procollagen, type XI, alpha 2,
12816	0.08	0.2	0.28	0.31	0.35	0.17	0.18	0.17	0.16	0.27	0.3	0.23	6.53	7.7	6.04	5.86	6.73	0.18	0.24	0.11	Col12a1	procollagen, type XII, alpha 1
12817	0.55	0.12	0.33	0.27	0.45	0.33	0.36	0.19	0.1	0.06	0.08	0.34	0.59	0.37	0.06	0.29	0.87	0.52	0.36	0.38	Col13a1	procollagen, type XIII, alpha 1,procollagen, type XIII, alpha 1,
12818	4.58	6.06	4.85	2.66	6.67	4.72	4.9	7.46	6.16	1.98	1.88	2.39	12.92	4.93	19.87	3.85	14.37	5.82	6.76	1.84	Col14a1	procollagen, type XIV, alpha 1,procollagen, type XIV, alpha 1,procollagen, type XIV, alpha 1,
12819	23.21	42.73	25.07	17.41	27.25	14.16	15.79	40.93	23.03	16.27	17.09	14.14	63.37	40.41	58.92	31.89	50.44	29.65	29.52	22.43	Col15a1	procollagen, type XV
12821	0.05	0.09	0.05	0.09	0.03	0.03	0.08	0.12	0.07	0	0	0.08	0.03	0.06	0.05	0	0.03	0.06	0.18	0.09	Col17a1	procollagen, type XVII, alpha 1,procollagen, type XVII, alpha 1,
12822	2.72	3.66	2.36	2.28	3.19	1.83	2.04	4.89	2.42	2.3	1.85	2.36	7.7	6.33	5.45	3.97	6.17	3.19	3.37	3.83	Col18a1	procollagen, type XVIII, alpha 1
12823	0	0.04	0	0	0	0.02	0.01	0	0	0	0.02	0	0	0	0	0	0	0.04	0	0	Col19a1	procollagen, type XIX, alpha 1,procollagen, type XIX, alpha 1,
12824	0	0.12	0.01	0	0.01	0.01	0.01	0.04	0.02	0	0.02	0.04	0	0.18	0.02	0	0.05	0.05	0.07	0	Col2a1	procollagen, type II, alpha 1,procollagen, type II, alpha 1,procollagen, type II, alpha 1,
12825	74.56	123.87	69.41	39.85	80.37	35	36.5	100.29	70.21	54.28	43.39	51.09	845.22	695.47	1078.67	610.07	806.54	64.94	59.42	50	Col3a1	procollagen, type III, alpha 1
12826	65.76	124.34	71.38	54.99	46.44	22.44	33.58	95.46	70.12	63.55	54.89	54.8	322.04	358.77	241.19	241.14	256.71	78.97	69.97	84.81	Col4a1	procollagen, type IV, alpha 1
12827	54.19	75.62	53.19	44.97	54.97	31.85	37	71.15	49.39	43.8	38.68	36.55	259.78	269.78	196.3	176.73	197.05	63.16	52.23	68.2	Col4a2	procollagen, type IV, alpha 2
12828	0.46	0.55	0.26	0.55	0.37	0.23	0.28	0.47	0.49	0.56	0.4	0.59	0.21	0.26	0.24	0.11	0.17	0.61	0.44	0.49	Col4a3	procollagen, type IV, alpha 3
12829	1.03	1.39	1.78	1.16	0.89	0.65	0.95	1.53	1.31	1.96	1.03	1.69	0.82	0.85	0.7	0.51	0.81	1.34	1.37	1.64	Col4a4	procollagen, type IV, alpha 4
12830	7.85	11.07	8.47	8.54	8.07	3.87	4.88	9.37	7.54	6.62	5.44	6.62	12.21	6.61	11.86	5.58	11.45	11.69	13.46	11.6	Col4a5	procollagen, type IV, alpha 5,procollagen, type IV, alpha 5,
12831	6.83	11.06	8.17	6.66	10.91	4.84	5.49	14.77	8.64	7.25	6.89	5.9	99.92	95.95	84.83	61.17	80.92	10.58	9.94	9.66	Col5a1	procollagen, type V, alpha 1
12832	7.04	11.01	7.78	6.58	8.62	3.85	4.93	9.08	7.92	8.43	5.47	7.49	156.81	139.53	151.64	110.37	147.72	6.97	7.51	6.35	Col5a2	procollagen, type V, alpha 2
12833	27.43	39.84	26.03	26.07	42.78	36.67	36.59	51.06	34.74	25.77	21.91	22.22	161.9	120.04	128.22	70.42	128.02	36.48	36.21	30.07	Col6a1	procollagen, type VI, alpha 1
12834	24.18	34.49	25.08	21.45	34.41	18.41	21.02	50.62	29.4	23.17	16.9	17.83	166.82	128.1	122.84	76.68	130.13	34.21	35.4	28.08	Col6a2	procollagen, type VI, alpha 2,procollagen, type VI, alpha 2,
12836	0.15	0.04	0.03	0.08	0.1	0.05	0.1	0.83	0.49	0.47	0.65	0.54	0.39	0.32	0.15	0.11	0.28	0.1	0.15	0.1	Col7a1	procollagen, type VII, alpha 1
12837	3.76	7.64	5.58	6.91	5.88	4.22	4.87	9.61	7.85	6.31	5.23	6.17	73.4	61.91	61.92	54.98	60.52	8.1	6.81	6.24	Col8a1	procollagen, type VIII, alpha 1
12839	0.02	0	0	0	0	0	0.01	0	0	0.04	0	0.03	0	0.03	0	0	0.01	0	0.03	0.03	Col9a1	procollagen, type IX, alpha 1,procollagen, type IX, alpha 1,
12840	0.03	0.06	0.03	0.37	0.08	0	0.1	0.09	0	0.24	0	0.2	0.22	0	0.25	0.2	0.16	0.27	0.26	0.05	Col9a2	procollagen, type IX, alpha 2
12841	0.07	0	0.17	0.27	0.11	0.12	0.19	1.13	0.45	0.93	0.58	0.53	0.07	0.21	0.03	0.04	0.04	0.08	0.22	0.1	Col9a3	procollagen, type IX, alpha 3
12842	32.55	44.24	29.43	26.54	41.74	14.7	15.16	73.28	39.45	32.65	27.89	24.78	585.34	431.49	489.99	285.18	440.06	44.17	41.35	36.38	Col1a1	procollagen, type I, alpha 1
12843	32.42	53.31	29.43	36.23	47.76	21.48	22.36	72.63	45.49	44.69	41.02	38.3	504.79	385.65	511.46	315.44	411.39	53.31	56.02	50.51	Col1a2	procollagen, type I, alpha 2
12845	3.14	2.47	2.45	3.14	1.65	2.56	3.23	4.05	1.24	3.36	1.91	2.25	3.05	2.54	2.54	1.79	2.13	3.03	5.69	2.81	Comp	cartilage oligomeric matrix protein
12846	89.74	80	80.31	89.08	70.75	64.18	67.6	99.52	95.63	94.16	104.22	88.97	153.28	133.83	86.9	96.12	119.77	105.34	96.42	109.8	Comt	catechol-O-methyltransferase,catechol-O-methyltransferase,
12847	29.86	36.65	27.95	30.84	41.01	33.38	33.15	45.78	38.01	39.21	37.52	40	51.1	48.41	47.09	56.06	50.79	41.13	40.88	36.32	Copa	coatomer protein complex subunit alpha,coatomer protein complex subunit alpha,
12848	20.99	22.18	28.14	33.56	21.05	32.27	29.71	18.94	44.52	44.66	43.52	52.89	30.84	33.41	49.6	69.08	47.65	16.12	13.82	12.06	Cops2	COP9 (constitutive photomorphogenic) homolog,,COP9 (constitutive photomorphogenic) homolog,,
12850	89.45	70.43	51.19	94.8	113.84	120.99	157.81	60.01	43.8	52.12	48.92	46.13	44.46	41.57	35	48.88	41.55	81.57	100.3	98.14	Coq7	demethyl-Q 7
12854	0	0.22	0	0.1	0	0.11	0	0	0	0	0	0	0	0.19	0	0.15	0	0.43	0.16	0	Cort	cortistatin
12856	242.4	118.85	201.76	221.24	252.17	146.63	154.19	228.9	86.29	79.66	155.15	77.79	109.58	45.67	84.36	61.2	88.78	178.18	170.38	215.12	Cox17	cytochrome c oxidase subunit XVII assembly
12857	2335.57	1971.82	1607.58	1770.88	1703.6	1901.13	1732.23	2311.54	1651.45	1611.31	1765.44	1468.62	802.42	739.82	508.33	905.72	634.82	2185.55	2201.53	2353.74	Cox4i1	cytochrome c oxidase subunit IV isoform 1,cytochrome c oxidase subunit IV isoform 1,
12858	772.96	570.51	698.49	697.5	514.69	809.67	664.96	631.38	539.97	486.62	595.59	550.05	356.25	254.71	324.68	345.32	395.7	739.3	753.85	667.17	Cox5a	cytochrome c oxidase, subunit Va
12859	1384.55	963.13	975.8	1113.05	1734.71	1542.41	1230.37	1723.26	855.19	1027.15	1207.05	903.66	707.25	541.7	379.47	593.56	575.33	1434.23	1270.05	1508.05	n/a	n/a
12861	107.29	73.16	88.54	120.65	169.15	117.51	208.26	161.26	108.33	88.26	71.61	60.8	244.22	224.31	130.81	131.92	180.4	121.67	129.78	142.17	Cox6a1	cytochrome c oxidase, subunit VI a, polypeptide
12862	2263.86	973.9	1953.38	1382.78	1405.09	1139.01	1219.25	3019.86	1339.26	1205.02	2120.77	858.34	760.88	595.7	375.25	448.24	561.54	2670.19	2588.92	3365.74	Cox6a2	cytochrome c oxidase, subunit VI a, polypeptide
12864	1248.54	1018.49	1063.1	1175.91	655.54	891.46	693.28	1023.69	735.07	938.51	986.78	904.94	428.96	358.46	437.94	502.17	462.16	1104.89	932.24	1000.42	Cox6c	cytochrome c oxidase, subunit VIc
12865	2029.02	1611.05	1454.13	794.23	1357.77	3018.14	2985.79	1186.56	766.05	455.73	1250.96	437.19	301.02	160.99	176.22	422.06	254.93	1329.74	1185.71	1280.22	Cox7a1	cytochrome c oxidase, subunit VIIa 1
12866	727.81	604.88	596.88	457.93	217.79	167.87	212.22	366.85	215.54	168.61	268.2	180.45	275.74	120.33	199.57	234.2	206.68	550.71	541.22	536.36	Cox7a2	cytochrome c oxidase, subunit VIIa 2
12867	1294.65	1083.47	955.57	1753.02	1056.28	352.73	555.12	1812.36	558.35	1044.59	1026.59	953.39	553.88	380.48	360.88	414.42	513.11	1783.62	1180.4	1419.12	Cox7c	cytochrome c oxidase, subunit VIIc
12868	101.63	55.73	80.84	71.1	118.46	92.96	103.7	164.75	97.45	67.35	89.21	49.16	109.84	95.59	63.82	50.29	88.86	156.34	155.03	178.78	Cox8a	cytochrome c oxidase, subunit VIIIa
12869	1029.57	667.82	753.83	881.76	735.23	504.25	605.15	868.27	372.04	431.64	786.05	372.08	210.96	120.03	125.79	175.29	167.25	794.25	665.35	870.11	Cox8b	cytochrome c oxidase, subunit VIIIb
12870	21.23	20.23	21.92	26.48	18.25	18.7	18.6	10.6	25.99	20.44	18.61	23.41	46.35	68.84	62.81	68.36	61.78	22.37	17.72	12.75	Cp	ceruloplasmin isoform a,ceruloplasmin isoform a,ceruloplasmin isoform a,
12873	0	0.07	0.11	0.14	0.03	0.1	0.03	0	0.16	0	0	0	0	0	0	0	0.02	0.09	0	0.05	Cpa3	carboxypeptidase A3, mast cell
12874	5.78	9.39	9.78	12.45	12.02	8.11	9.3	12.68	13.72	11.91	11.21	13.65	14.55	18.36	22.93	14.86	15.91	11.24	10.38	10.58	Cpd	carboxypeptidase D
12876	91.65	77.17	76.75	105.24	116.33	110.79	99.26	115.1	78.64	95.74	75.04	92.7	51.49	46.99	36.65	38.06	47.03	113.13	119.15	119.8	Cpe	carboxypeptidase E
12877	3.4	2.99	3.34	5.22	7.48	5.15	4.91	9.62	8.52	10.21	8.66	9.6	12.39	14.55	12.98	11.73	12.46	9.36	8.23	7.84	Cpeb1	cytoplasmic polyadenylation element binding
12879	0.1	0.53	0.46	2.45	2.41	0.42	1.3	5.84	4.25	3.47	1.4	2.14	1.46	1.49	2.21	0.47	0.73	4.07	3.75	5.41	Cys1	cystin 1
12889	0	0	0	0.24	0	0.09	0.07	0	0	0	0	0	0.23	1.15	0	0	0.06	0	0	0	Cplx1	complexin 1
12890	2.2	4.41	1.22	2.75	3.82	4.74	4.63	4.51	2.02	1.71	0.77	1.03	3.99	2.95	5.24	1.15	2.63	1.61	2.47	3.7	Cplx2	complexin 2
12891	0.07	0.12	0	0	0.06	0.06	0.02	0.05	0	0	0	0.02	0	0	0.19	0	0	0	0	0	Cpne6	copine VI,copine VI,copine VI,
12892	17.08	15.05	15.33	21.73	28.87	24.33	25.39	26.91	24.1	21.87	16.48	18.79	6.02	7.51	7.24	3.59	5.02	26.26	25.79	26.42	Cpox	coproporphyrinogen oxidase
12894	8.18	12.49	11.02	11.77	12.09	11	11.63	10.31	9.35	9.27	6.6	7.93	30.79	27.26	22.24	19.55	25.09	13.54	12.16	14.9	Cpt1a	carnitine palmitoyltransferase 1a, liver
12895	220.35	251.82	216.96	245.62	202.13	197.86	235.73	244.42	222.39	197.11	192.95	180.27	113.48	107.55	78.24	84.67	97.81	315.01	285.53	315.35	Cpt1b	carnitine palmitoyltransferase 1b, muscle,carnitine palmitoyltransferase 1b, muscle,
12896	104.65	97.56	93.47	98.44	69.32	60.18	68.08	112.87	117.05	91.88	94.92	93.84	29.48	26.97	22.78	22.41	25.96	132.4	147	149.39	Cpt2	carnitine palmitoyltransferase 2
12902	0.05	0.05	0.01	0	0	0	0	0.05	0	0	0	0	0	0	0.04	0	0.05	0	0	0	Cr2	complement receptor 2,complement receptor 2,complement receptor 2,
12903	0	0	0	0.18	0	0	0	0.81	0	0.21	0	0.15	0.63	0.36	0	0	0.27	0.82	0	0.16	Crabp1	cellular retinoic acid binding protein I
12904	0	0.21	0	0	0.09	0.6	0.41	0.8	0.85	0.83	0.14	1.06	0.5	0.54	0	0.98	0.54	0.41	0	0	Crabp2	cellular retinoic acid binding protein II
12905	6.2	7.58	4.96	6.86	5.19	2.09	3.69	5.84	4.63	4.58	3.37	4.56	4.18	3.85	3.39	1.9	2.87	7.38	9.12	11.21	Cradd	CASP2 and RIPK1 domain containing adaptor with,CASP2 and RIPK1 domain containing adaptor with,CASP2 and RIPK1 domain containing adaptor with,
12908	225.53	233.84	200.46	225.64	161.57	149.16	159.16	269.16	224.02	211.75	200.03	193.56	103.48	103.13	72.55	81.27	91.05	299.52	317.66	331.11	Crat	carnitine acetyltransferase,carnitine acetyltransferase,carnitine acetyltransferase,
12909	5.92	13.23	6.09	13.04	13.16	13.22	9.12	20.25	10.73	10.52	8.67	11.53	9.97	7.73	7.6	6.89	11.28	8.69	13.57	10.91	Crcp	calcitonin gene-related peptide-receptor
12912	2.97	4.46	4.8	6.13	5.1	16.17	12.19	4.68	4.39	3.91	6.79	5.39	5.31	5.72	5.6	7.55	7.94	4.46	4.26	4.19	Creb1	cAMP responsive element binding protein 1,cAMP responsive element binding protein 1,
12913	17.4	21.53	10.31	15.5	18.21	13.09	16.44	28.17	20.77	22.86	17.68	21.56	30.77	31.24	28.31	32.92	28.11	17.64	21.31	18.99	Creb3	cAMP responsive element binding protein 3
12914	4.26	4.71	5.19	6.13	5.06	4.84	4.86	9.08	9.95	10.13	7.93	8.58	7.69	11.17	6	7.56	6.37	6.52	6.89	6.75	Crebbp	CREB binding protein,CREB binding protein,
12915	9.09	8.44	6.79	7.8	8.12	6.33	7.5	22.6	12.49	13.3	14.43	11.26	12.21	10.36	7	8.84	9.8	10.49	11.87	12.4	Crebl1	cAMP responsive element binding protein-like 1
12918	0	0	0	0	0.1	0	0	0	0.09	0	0	0	0	0	0	0	0.14	0	0	0	Crh	corticotropin releasing hormone
12921	0.04	0	0	0	0	0	0	0	0	0	0	0	0	0	0	0	0	0.05	0	0	Crhr1	corticotropin releasing hormone receptor 1
12922	9.71	13.06	7.75	9.97	9.78	6.71	7.13	10.23	8.34	7.25	7.87	7.39	3.68	3.92	3.1	2.35	3.03	14.36	12.93	17.35	Crhr2	corticotropin releasing hormone receptor 2,corticotropin releasing hormone receptor 2,corticotropin releasing hormone receptor 2,
12925	77.72	86.11	51.65	86.19	52.38	35.35	39.88	118.93	59.76	65.85	51.58	61.77	249.08	171.48	130.19	243.21	240.45	125.23	84.64	88.6	Crip1	cysteine-rich protein 1 (intestinal)
12927	7.18	5.67	7.67	6.48	8.87	4.18	4.77	14.2	8.6	10.42	6.96	7.37	11.95	17.89	6.68	11.69	9.65	10.55	13	12.29	Bcar1	breast cancer anti-estrogen resistance 1,breast cancer anti-estrogen resistance 1,
12928	20.87	26.89	21.8	32.66	40.51	35.93	42.89	44.95	34.97	40.99	35.15	38.3	37.97	48.28	33.75	38.97	31.45	28.6	30.86	31.01	Crk	v-crk sarcoma virus CT10 oncogene homolog,v-crk sarcoma virus CT10 oncogene homolog,
12929	4.98	9.96	5.94	10.13	13.22	11.8	12.05	16.48	12.34	15.27	13.65	14.01	8.07	10.66	10.82	8.05	7.91	10.72	10.63	11.49	Crkl	v-crk sarcoma virus CT10 oncogene homolog
12931	0.2	0.65	0.5	0.48	1.08	0.25	0.42	0.72	0.72	0.53	0.47	0.51	53.68	34.18	15.58	27.99	39.49	1.49	0.38	0.46	Crlf1	cytokine receptor-like factor 1
12933	0.05	0.24	0.45	0.36	0.23	0.04	0.3	0.18	0.31	0.19	0.22	0.41	0.34	0.41	0.24	0.41	0.43	0.46	0.24	0.29	Crmp1	collapsin response mediator protein 1
12934	6.62	8.48	5.74	11.26	7.25	8.83	11.11	9.89	9.14	9.08	7.92	9.56	9.21	11.78	9.09	4.72	7.93	8.2	9.22	10	Dpysl2	dihydropyrimidinase-like 2
12936	0	0.04	0	0.05	0.02	0.02	0	0.03	0	0	0	0.03	0.04	0.04	0.16	0	0.02	0	0.01	0.08	Pcdha4	protocadherin alpha 4
12937	0	0	0	0	0.02	0	0	0	0	0	0	0	0	0	0.02	0	0	0	0	0	Pcdha6	protocadherin alpha 6
12939	0	0	0	0	0.02	0	0.01	0	0	0	0	0	0.01	0	0	0	0.01	0	0	0	Pcdha7	protocadherin alpha 7
12941	0	0.02	0	0.02	0.02	0.01	0	0.03	0.02	0	0	0	0	0.02	0.02	0	0.06	0.03	0	0	Pcdha5	protocadherin alpha 5
12942	0	0	0	0	0.02	0	0	0.03	0	0	0	0	0.03	0	0.02	0	0.01	0	0.03	0	Pcdha11	protocadherin alpha 11,protocadherin alpha 11,
12943	0	0	0	0	0.02	0	0	0	0.04	0	0.09	0	0	0	0.02	0.14	0	0.06	0	0	Pcdha10	protocadherin alpha 10
12944	0	0	0	0	0	0	0.07	0	0	0	0	0	0	0	0	0	0	0	0	0	Crp	C-reactive protein, petaxin related
12945	0	0	0.01	0	0	0	0	0	0	0	0	0	0	0	0	0	0	0	0	0	Dmbt1	deleted in malignant brain tumors 1,deleted in malignant brain tumors 1,
12946	23.15	20.65	23.35	21.56	17.63	26.76	26.14	18.23	22.02	24.16	20.3	25.13	26.19	22.75	27.45	34.59	32.31	19.53	16.26	15.14	Crry	complement receptor related protein,complement receptor related protein,complement receptor related protein,
12950	0.45	0.13	0.03	0.05	0.22	0.09	0.12	0	0	0.12	0.13	0.07	0	0	0	0	0.02	0.57	0.04	0.24	Hapln1	hyaluronan and proteoglycan link protein 1
12951	0	0	0	0	0	0	0	0	0	0	0	0	0	0	0	0	0	0	0	0.12	Crx	cone-rod homeobox containing,cone-rod homeobox containing,
12952	4.26	5.03	2.71	4.56	4.89	3.7	3.49	5.24	5.26	5.78	5.76	5.71	5.09	7.92	5.77	9.94	6.04	6.58	6.09	4.75	Cry1	cryptochrome 1 (photolyase-like)
12953	5.79	7.02	6.72	12.44	11.95	7.83	10.23	13.69	12.73	11.29	9.79	8.65	10.48	14.63	7	9.63	8.2	13.87	15.84	16.89	Cry2	cryptochrome 2 (photolyase-like),cryptochrome 2 (photolyase-like),
12954	0	0	0	0	0	0	0	0	0	0	0	0	0	0	0	0.09	0	0	0	0	Cryaa	crystallin, alpha A
12955	1981.85	1892.98	1601.71	1624.12	1585.1	940.98	1168.76	2339.99	1322.67	1320.8	1475.56	1261.92	2430.45	2039.82	1610.19	2166.64	2057.84	2301.4	2433.75	2739.18	Cryab	crystallin, alpha B,crystallin, alpha B,crystallin, alpha B,
12957	0	0	0.07	0.11	0.41	0.13	0	0.6	1.82	0.65	0.79	1.23	0	0.11	0	0.53	0	0	0	0	Cryba1	crystallin, beta A1
12959	13.73	13.16	9.44	10.96	8.6	8.85	8.46	14.87	7.94	8.62	8.21	7.32	0.92	0.96	0	0.19	0.85	11.93	15.32	17.21	Cryba4	crystallin, beta A4,crystallin, beta A4,
12960	2.26	1.51	1.98	3.71	4.11	2.63	2.75	3.75	3.1	5	4.43	2.57	0.6	0.17	0.87	1	0.58	2.41	3.39	1.56	Crybb1	crystallin, beta B1
12962	0.55	0.76	1.21	1.18	0.79	1.02	1.18	1.53	0.72	0.75	0.67	0.18	0.45	1.73	0.06	0	0.49	1.14	0.9	0.78	Crybb3	crystallin, beta B3
12964	0	0	0	0	0	0	0	0.2	0	0	0.17	0	0.08	0	0	0	0	0	0	0	Cryga	crystallin, gamma A
12965	0	0	0	0	0	0	0	0	0	0	0.17	0	0	0	0	0	0	0	0	0	Crygb	crystallin, gamma B
12966	0	0	0	0	0	0	0	0	0	0	0.37	0	0	0	0	0	0	0	0	0	Crygc	crystallin, gamma C isoform 2
12971	0.1	0	0	0.37	0.2	0	0.1	0.07	0	0.17	0.12	0.13	0.63	1.13	0	2.16	0.91	0.23	0.06	0.2	Crym	crystallin, mu
12972	4.9	4.07	5.53	6.67	7.06	3.33	5.36	5.37	5.8	4.93	4.82	4.39	4.93	3.2	7.37	3.62	4.86	6.78	5.7	5.66	Cryz	crystallin, zeta
12974	429.07	543.04	401.97	556.08	410.24	354.45	343.75	533.34	432.94	422.64	370.2	429.78	252.74	255.51	200.06	229.92	223.32	564.61	531.32	556.38	Cs	citrate synthase
12977	6.57	6.44	6.68	8.82	9.89	4.8	4.74	9.77	6.76	9.88	12.77	11.72	24.11	21.13	17.12	13.8	22.09	10.39	5.86	6	Csf1	colony stimulating factor 1,colony stimulating factor 1,colony stimulating factor 1,
12978	8.07	11.15	6.67	7.36	10.02	5.74	5.22	10.95	8.33	7.55	6.21	6.51	49.72	38.3	54.79	33.02	43.27	8.18	10.74	9.87	Csf1r	colony stimulating factor 1 receptor,colony stimulating factor 1 receptor,colony stimulating factor 1 receptor,
12981	0	0	0	0	0	0	0	0.15	0.17	0.61	0	0.44	0	0	0	0	0.07	0	0	0	Csf2	colony stimulating factor 2
12982	1.81	1.1	1.56	3.19	6.25	2.34	2.7	5.08	3.75	2.19	1.71	1.4	13.64	17.09	5.66	6.54	9.12	2.28	2.52	4.15	Csf2ra	colony stimulating factor 2 receptor alpha
12983	0.46	0.44	0.91	0.39	0.9	0.31	0.33	1.32	1.14	0.83	0.76	0.99	14.76	17.98	9.97	12.85	11.52	0.49	0.5	0.42	Csf2rb	colony stimulating factor 2 receptor, beta,,colony stimulating factor 2 receptor, beta,,
12984	0.41	0.19	0.85	0.34	0.51	0.11	0.14	0.95	0.91	0.69	0.48	0.49	10.86	10.58	6.62	6.95	9.05	0.29	0.33	0.35	Csf2rb2	colony stimulating factor 2 receptor, beta 2,
12985	0	0	0.07	0.11	0.52	0.06	0.25	0.29	0.21	0.38	0.69	0.33	0	0	0	0.26	0	0	0	0	Csf3	colony stimulating factor 3
12986	0.66	0.2	0.65	0.16	0.32	0.08	0.13	0.76	0.69	0.47	0.14	0.18	5.17	2.8	4.86	2.1	3.51	0.34	0.46	0.79	Csf3r	colony stimulating factor 3 receptor
12988	7.87	8.31	7.66	10.03	10.72	10.55	7.49	17.06	9.21	11.17	9.36	10.72	14.83	13.16	12.22	12.91	11.92	9.95	10.8	12.28	Csk	c-src tyrosine kinase,c-src tyrosine kinase,c-src tyrosine kinase,
12995	39.46	49.06	45.52	57.06	57.41	73.37	58.96	44.54	54.95	53.64	47.41	63.88	44.26	52.84	39.59	57.97	50.44	46.46	48.05	41.92	Csnk2a1	casein kinase 2, alpha 1 polypeptide,casein kinase 2, alpha 1 polypeptide,
13000	6.5	7.76	7.64	7.82	8.5	17.45	14.59	7.41	8.2	8.57	5.52	9.95	12.03	17.06	10.95	13.09	14.44	6.98	6.24	8.56	Csnk2a2	casein kinase 2, alpha prime polypeptide,casein kinase 2, alpha prime polypeptide,
13001	60.67	65.94	61.77	50.24	42.47	24.4	25.88	103.3	61.11	73.17	87.23	63.39	74.33	71.11	49.01	69.51	66.75	65.77	72.19	79.86	Csnk2b	casein kinase 2, beta polypeptide,casein kinase 2, beta polypeptide,
13002	18.08	22.43	16.24	26.9	45.14	31.99	37.98	26.78	25.31	26.33	22.32	24.32	33.57	34.73	22.07	28.19	28.99	28.39	27.16	25.91	Dnajc5	DnaJ (Hsp40) homolog, subfamily C, member 5,DnaJ (Hsp40) homolog, subfamily C, member 5,DnaJ (Hsp40) homolog, subfamily C, member 5,
13003	0.47	2.11	1.17	1.95	3.52	1.69	1.05	1.67	2.48	1.81	1.08	1.82	11.79	18.25	15.67	12.09	12.74	1.24	1.3	0.67	Vcan	versican,versican,
13004	0	0	0	0.01	0.02	0	0	0.03	0	0	0.05	0	0.01	0.03	0	0.02	0.02	0.01	0	0	Ncan	neurocan
13006	13.26	15.9	14.26	20	18.13	27.14	23.16	16.07	20.17	23.5	17.24	26.17	13.55	20.51	18.18	21.39	17.81	12.33	12.3	9.58	Smc3	chondroitin sulfate proteoglycan 6
13007	12.93	13.88	11.02	19.66	22.56	11.7	12.62	23.45	20.07	21.89	15.82	17.86	31.32	33.13	18.84	19.58	22.45	23.29	29.27	24.33	Csrp1	cysteine and glycine-rich protein 1
13008	14.11	18.6	11.32	14.61	23.26	12.38	11.67	22.04	14.38	10.52	12.96	13.47	56.85	41.93	45.72	27.56	44.86	15.52	15.66	15.26	Csrp2	cysteine and glycine-rich protein 2
13009	957.61	1011.93	792.99	797.46	573.88	521.88	478.54	741.36	612.65	510.9	540.18	478.77	728.1	439.51	483.33	485.05	616.16	884.99	976.41	1129.14	Csrp3	cysteine and glycine-rich protein 3,cysteine and glycine-rich protein 3,
13010	386.13	310.01	288.91	488.38	672.6	604.34	793.88	584.84	295.71	317.62	281.75	265	658.18	472.8	454.67	417.61	556.75	491.04	512.07	556.62	Cst3	cystatin C
13011	0	0	0	0	0.07	0.15	0.13	0	0	0	0	0.4	0	0.41	0	0.11	0.26	0	0	0	Cst7	cystatin F (leukocystatin)
13012	0	0	0	0	0	0	0	0	0.15	0	0	0	0	0	0	0	0	0	0	0	Cst8	cystatin 8 (cystatin-related epididymal,cystatin 8 (cystatin-related epididymal,
13014	10.14	13.95	11.6	11.52	12.2	13.7	12.78	13.81	11.56	9.94	11.72	9.44	108.23	50.79	59.59	77.57	85.04	14.3	16.27	12.19	Cstb	cystatin B
13016	64.47	50.92	55.48	65.13	60.99	46.21	52.65	75.09	48.28	52.87	54.82	40.04	61.6	61.51	41.74	41.4	46.77	74.66	78.78	83.49	Ctbp1	C-terminal binding protein 1,C-terminal binding protein 1,
13017	9.07	11.38	9.16	11.03	7.4	4.28	4.53	14.12	13.01	13.29	11.45	10.88	12.83	17.7	8.62	10.51	10.93	11.14	13.44	13.55	Ctbp2	C-terminal binding protein 2,C-terminal binding protein 2,
13018	12.8	16.93	13.11	15.94	16.83	20.7	21.5	20.28	18.44	19.93	15.63	18.87	12.47	19.76	11.27	16.57	12.65	14.97	15.83	14.08	Ctcf	CCCTC-binding factor,CCCTC-binding factor,
13019	2.04	1.69	0.96	3.42	3.58	1.45	3.34	4.62	4.47	3.58	2.55	2.78	0.87	0.77	0.86	0	0.29	5.02	5.48	8.53	Ctf1	cardiotrophin 1
13024	22.3	24.15	23.89	24.75	25.18	24.23	24.01	12.8	31.11	40.76	23.8	50.67	150.55	202.96	86.29	181.11	179.96	23.29	21.3	20.97	Ctla2a	cytotoxic T lymphocyte-associated protein 2,cytotoxic T lymphocyte-associated protein 2,
13026	18.7	25.3	21.5	32.99	47.79	42.78	36.7	32.07	35.69	41.49	34.79	39.23	33.67	33.93	39.58	30	32.01	28.16	26.84	28.74	Pcyt1a	phosphate cytidylyltransferase 1, choline, alpha
13030	219.83	253.41	192.38	223.21	253.35	187.83	207.08	323.53	223.51	216.79	247.8	213.53	787.03	511.42	852.88	454.71	714.93	258.99	284.92	272.84	Ctsb	cathepsin B preproprotein
13032	5.86	6.11	5.08	5.75	7.05	7.87	6.43	7.38	5.12	3.84	4.51	5.64	28.1	23.18	37.35	29.89	31.43	6.38	6.96	4.84	Ctsc	cathepsin C preproprotein
13033	549.88	502.45	453.91	470.27	583.65	372.9	367.14	586.21	505.95	481.56	456.49	469.05	925.57	624.23	773.43	586.91	802.57	596.86	580.03	591.05	Ctsd	cathepsin D
13034	0.11	0	0.18	0.31	0.15	0.03	0.1	0.35	0	0.13	0	0	0.83	0.96	2.75	0.79	0.91	0.17	0.05	0.05	Ctse	cathepsin E preproprotein
13036	10.03	9.56	10.68	9.68	9.82	6.82	8.58	9.52	9.68	9	7.49	8.85	31.26	25.34	45.52	20.1	33.51	11.96	10.82	12.23	Ctsh	cathepsin H
13038	3.13	3.28	2.24	4.34	5.55	4.16	4.18	5.63	1.58	5.51	3.59	3.99	31.52	17.23	32.85	20.72	37.19	5.7	3.52	3.87	Ctsk	cathepsin K
13039	119.55	93.78	82.19	85.07	73.53	63.47	68.78	99.19	82.8	75.43	67.47	82.32	432.67	296.15	539.19	287.23	415.53	128.26	114.34	98.68	Ctsl	cathepsin L preproprotein
13040	7.17	9.14	5.3	7.42	14.62	5.71	6.92	8.29	7.72	6.92	3.92	8.24	237.56	199.4	265.25	203.24	241.44	6.5	8.25	6.11	Ctss	cathepsin S preproprotein,cathepsin S preproprotein,
13041	0.25	0.61	0.16	0.07	0.78	0.47	0.18	0.17	0.12	0.53	0.41	0.3	0.23	0.39	0.08	0.1	0.17	0.44	0.38	0.41	Ctsw	cathepsin W preproprotein
13043	18.33	23.65	14.13	23.99	32.96	17.88	17.49	29.02	27.99	25.85	17.26	24.7	52.87	79.25	38.85	55.79	43.52	28.63	34.1	27.69	Cttn	cortactin
13046	351.03	219.69	345.01	415.81	422.78	266.46	324.26	178.66	143.3	186.69	174.5	175.08	29.97	33.85	37.93	27.96	29.11	33.84	36.09	33.29	Cugbp1	CUG triplet repeat, RNA-binding protein 1
13047	21.46	31.55	18.37	32.65	30.12	22.98	30.6	25.09	28.9	24.33	20.25	25.88	30.89	26.55	22.15	25.39	27	41.61	32.59	37.58	Cutl1	CCAAT displacement protein isoform a,CCAAT displacement protein isoform a,CCAAT displacement protein isoform a,CCAAT displacement protein isoform a,CCAAT displacement protein isoform a,CCAAT displacement protein isoform a,
13048	2.94	3.29	3.03	2.75	3.6	1.53	1.75	3.39	3.01	2.25	2.38	1.76	0.48	0.35	0.28	0.17	0.24	4.33	6.26	6.03	Cutl2	cut-like 2
13051	1.27	2.21	1.65	0.38	1.2	0.27	0.24	1.67	0.64	0.73	0.98	0.32	0.27	0.1	1.63	0.75	0.29	0.36	0.65	0.52	Cx3cr1	chemokine (C-X3-C) receptor 1
13052	11.21	17.01	13.15	13.4	11.84	7.56	9.26	9.79	10.76	10.03	8.72	10.79	7.12	7.83	4.83	5.59	5.58	13.95	10.63	13.8	Cxadr	coxsackievirus and adenovirus receptor isoform
13056	1.82	4.23	3.85	4.14	6.39	3.79	4.32	8.49	4.25	6.3	3.42	5.83	12.64	15.75	10.05	19.81	10.49	6.12	6.7	5.53	Cyb561	cytochrome b-561,cytochrome b-561,
13057	28.53	17.04	16.84	16.92	30.42	17.71	15.15	34.73	20.6	18.97	21.55	14.06	103.62	77.93	52.66	66.15	76.58	23.34	26.3	31.96	Cyba	cytochrome b-245, alpha polypeptide
13058	0.79	2.27	1.55	1.57	2.94	2.2	1.64	1.76	1.16	0.69	0.62	0.83	10.68	8.27	18.43	7.84	10.71	0.81	0.99	1.29	Cybb	cytochrome b-245, beta polypeptide
13063	808.87	838	837.04	956.09	1048.43	907.01	1137.78	709.83	584.56	634	665.48	675.55	428.89	317.37	454.35	499.61	496	727.6	679.45	657.27	Cycs	cytochrome c, somatic
13067	0.39	0.23	0	1.19	0.31	0	0.28	1.25	0	0.47	1.09	2.53	0.56	0	0	0.94	0.9	0.46	0	0.73	Cyct	cytochrome c, testis
13070	0.15	0	0	0.1	0.12	0.02	0	0	0	0	0	0	0.08	0	0	0	0.03	0.03	0.13	0.04	Cyp11a1	cytochrome P450, family 11, subfamily a,
13072	0	0	0	0	0	0	0.04	0	0	0	0	0	0	0	0	0	0	0.03	0	0	Cyp11b2	cytochrome P450, family 11, subfamily b,
13074	0	0	0.03	0.02	0	0.02	0.07	0.07	0	0	0	0	0.03	0	0	0.25	0.03	0	0.07	0	Cyp17a1	cytochrome P450, family 17, subfamily a,
13076	0.21	0	0.07	0.07	0.4	0	0.05	0	0.14	0	0	0	0	0	0	0	0	0	0	0.03	Cyp1a1	cytochrome P450, family 1, subfamily a,,cytochrome P450, family 1, subfamily a,,
13077	0.02	0	0	0	0	0	0	0.03	0	0	0	0	0	0.15	0	0	0	0	0	0	Cyp1a2	cytochrome P450, family 1, subfamily a,
13078	0.78	0.41	1.43	1.18	1.31	0.76	0.86	1.58	1.96	1.33	1.12	1.2	17.38	21.5	10.33	11.89	15.7	1.03	1.33	1.5	Cyp1b1	cytochrome P450, family 1, subfamily b,,cytochrome P450, family 1, subfamily b,,
13079	0.06	0.05	0.03	0.09	0.12	0.15	0.06	0.04	0.09	0	0.07	0.04	0.09	0.13	0	0	0.15	0.07	0.07	0.12	Cyp21a1	cytochrome P450, family 21, subfamily a,
13082	0.18	0.05	0.15	0	0.1	0.09	0.06	0.25	0.08	0.18	0.15	0	0.11	0	0	0	0.18	0.03	0	0.04	Cyp26a1	cytochrome P450, family 26, subfamily a,
13088	2.67	2.21	2.08	3	2.42	2.74	4.17	1.94	3.29	1.64	2.54	2.83	2.45	1.11	3.1	2.17	2.81	2.79	3.52	5.89	Cyp2b10	cytochrome P450, family 2, subfamily b,
13089	0.44	0.2	0.43	0.19	0.13	0.14	0.2	0.11	0.16	0.35	0.37	0.18	0.36	0.39	0.81	0.13	0.43	0.39	0.5	0.7	Cyp2b13	cytochrome P450, family 2, subfamily b,,cytochrome P450, family 2, subfamily b,,
13090	0.22	0	0.16	0.06	0.15	0.02	0.18	0.11	0.28	0.05	0.17	0.23	0.09	0	0.13	0	0.06	0.03	0.11	0.23	Cyp2b19	cytochrome P450, family 2, subfamily b,,cytochrome P450, family 2, subfamily b,,
13094	0	0	0.21	0.02	0	0.05	0.06	0.08	0.04	0.1	0.27	0.07	0.06	0.13	0.66	0.13	0.03	0.36	0.21	0.12	Cyp2b9	cytochrome P450, family 2, subfamily b,
13099	0	0	0	0	0	0	0	0	0	0	0	0	0	0.28	0	0	0	0	0	0	Cyp2c40	cytochrome P450, family 2, subfamily c,
13101	0.45	0.1	0.34	0.16	0.11	0.18	0.51	0.11	0.24	0.1	0.84	0.09	0.55	0.62	0.29	0.03	0.31	0.31	0.42	0.11	Cyp2d10	cytochrome P450, family 2, subfamily d,
13105	0.48	0.34	0.21	0.04	0.13	0.3	0.57	0.52	0.16	0.1	0.58	0.19	0.58	0.7	0.44	0	0.34	0.38	0.9	0.49	Cyp2d9	cytochrome P450, family 2, subfamily d,
13106	1.86	1	1.54	1.58	1.08	3.56	4.59	1.59	2.27	0.74	1.23	0.91	4.36	2.13	5.28	2.45	3.98	3.77	1.57	1.27	Cyp2e1	cytochrome P450, family 2, subfamily e,
13107	0.06	0.05	0	0.11	0.02	0.05	0.1	0	0	0	0	0.07	0.06	0	0	0	0	0.13	0.14	0	Cyp2f2	cytochrome P450, family 2, subfamily f,
13109	0	0	0.03	0.08	0	0.07	0.1	0	0.08	0	0.49	0.04	0.14	0.04	0	0.13	0.09	0.03	0.1	0.04	Cyp2j5	cytochrome P450, family 2, subfamily j,
13110	2.25	2.05	2.91	3.54	2.41	2.81	3.62	2.12	2.06	4.52	3.58	5.32	3.63	4.01	3.29	6.92	4.49	2.87	2.13	1.97	Cyp2j6	cytochrome P450, family 2, subfamily j,
13113	0.76	0.55	1.2	1.17	0.39	0.73	0.86	0.17	0.98	0.49	0.04	0.26	0	0	0.08	0	0.04	0.32	0.39	0.38	Cyp3a13	cytochrome P450, family 3, subfamily a,
13115	0	0.14	0.13	0	0.13	0.05	0.13	0.15	0.23	0.05	0.13	0.05	0.12	0.29	0.02	0.19	0.09	0.12	0	0	Cyp27b1	cytochrome P450, family 27, subfamily b,
13116	0.29	0.18	0.41	0.66	0.88	0.34	0.53	0.23	0.43	0.47	0.24	0.24	0.81	1.07	1.12	0.67	0.46	1	1.36	1.06	Cyp46a1	cytochrome P450, family 46, subfamily a,
13117	0.09	0.05	0.14	0	0.02	0	0.06	0.12	0	0	0.17	0.11	0.31	0	0.64	0.17	0.27	0.03	0.11	0	Cyp4a10	cytochrome P450, family 4, subfamily a,,cytochrome P450, family 4, subfamily a,,cytochrome P450, family 4, subfamily a,,
13119	0	0	0	0.07	0	0.05	0	0	0	0	0	0.1	0	0	0	0	0.3	0	0	0.08	Cyp4a14	cytochrome P450, family 4, subfamily a,
13120	13.84	21.76	12.88	16.69	11.88	11.96	9.89	18.57	15.99	14.72	19.29	13.64	38.58	29.51	25.26	29.71	32.12	18.06	17.54	23.88	Cyp4b1	cytochrome P450, family 4, subfamily b,,cytochrome P450, family 4, subfamily b,,
13121	4.94	3.96	4.95	4.44	3.98	2.67	2.93	3	3.37	2.44	4.74	3.4	6.83	4.41	11.27	3.96	8.83	5.31	4.05	3.6	Cyp51	cytochrome P450, family 51
13123	0.24	0.18	0.17	0.34	0.35	0.46	0.45	0.4	0.79	0.7	0.71	0.59	1.84	2.88	1.73	3.97	2.26	0.43	0.38	0.17	Cyp7b1	cytochrome P450, family 7, subfamily b,
13124	0.04	0.12	0.08	0	0.07	0.15	0.22	0	0.06	0.24	0	0	0.07	0	0.28	0	0.11	0.03	0.11	0.09	Cyp8b1	cytochrome P450, family 8, subfamily b,
13132	6.53	8.35	7.94	7.36	11.35	5.07	5.65	11.82	8.64	9.15	7.71	8.94	38.8	42.74	33.01	32.91	41.07	7.7	8.77	9.44	Dab2	disabled homolog 2 isoform b
13134	2.72	3.56	2.36	3.12	4.18	2.42	2.21	4.59	3.17	4.55	3.89	2.74	1.45	1.6	0.46	1.94	1.35	2.83	3.57	3.33	Dach1	dachshund 1 isoform 1
13135	51.96	54.59	53.21	43.32	71.46	34.1	42.26	105.59	54.15	54.23	56.33	44.95	82.13	63.47	53.67	66.56	67	73.83	73.05	77.79	Dad1	defender against cell death 1,defender against cell death 1,
13136	2.55	3.83	5.06	3.31	4.64	3.64	3.39	4.96	6.49	3.52	2.46	4.31	3.02	3.57	4.44	3.19	4	3.86	3.43	2.37	Cd55	decay accelerating factor 1
13137	0.96	1.54	1.57	1.23	1.82	0.89	0.73	1.32	2.02	1.27	0.63	1.62	1.36	1.38	0.54	0.49	1.53	1.6	0.96	0.78	Daf2	decay accelerating factor 2
13138	59.63	98.94	73.63	79.19	74.79	46.26	49.57	81.89	99.91	73.2	68.64	66.53	97.67	108.7	84.13	74.17	84.44	137.06	131.72	139.79	Dag1	dystroglycan 1,dystroglycan 1,dystroglycan 1,dystroglycan 1,
13139	6.09	6.71	5.86	8.1	7.04	7.58	6.91	6.62	7.86	8.34	6.99	6.52	6.29	6.09	6.44	3.29	5.8	7.48	6.6	8.14	Dgka	diacylglycerol kinase, alpha
13142	0	0	0	0	0	0	0	0.06	0	0	0	0.06	0	0	0	0	0.06	0	0	0	Dao1	D-amino acid oxidase 1
13143	2.08	4.04	2.14	4.65	4.66	4.82	5.59	4.62	2.89	3.69	3.32	2.86	3.34	2.1	2.36	2.42	2.32	3.42	3.34	3.06	Dapk2	death-associated kinase 2
13144	7.66	7.58	7.08	11.25	13.65	5.82	6.49	30.83	18	18.24	15.7	15.13	20.07	20.23	8.78	10.18	14.44	15.36	17.94	22.07	Dapk3	death-associated kinase 3,death-associated kinase 3,death-associated kinase 3,death-associated kinase 3,
13163	5.11	6.15	4.03	6.67	8.11	6.33	6.39	13.76	8.69	9.42	8.57	8.75	8.81	9.01	5.93	6.96	8.12	6.33	7.83	8.47	Daxx	Fas death domain-associated protein,Fas death domain-associated protein,
13164	0.18	0	0	0.05	0.05	0.15	0.04	0	0	0	0	0.12	0.13	0.09	0	0	0	0	0	0.08	Dazl	deleted in azoospermia-like,deleted in azoospermia-like,
13166	0.48	0.8	0.43	0.44	0.79	0.25	0.5	0.61	0.33	0.4	0.64	0.26	0.26	0.1	0	0.16	0.24	0.36	0.46	0.78	Dbh	dopamine beta hydroxylase
13167	190.99	192.94	184.51	217.39	200.27	161.35	134.95	182.05	149.49	144.24	122.31	153.12	268.31	228.19	180.28	276.97	237.43	241.95	184.13	192.97	Dbi	diazepam binding inhibitor isoform 1
13168	0.84	0	0.54	0.54	0.11	0.24	0	0.58	2.06	1.01	0.17	1	0.91	0.43	0	0.17	0.49	0.82	0.36	0.2	Dbil5	diazepam binding inhibitor-like 5
13169	12.49	12.35	11.21	13.73	14.91	6.41	7.8	22.47	14.67	17.21	15.38	11.69	21.99	16.42	17.05	16.41	18.07	13.19	16.31	16.49	Dbnl	drebrin-like,drebrin-like,drebrin-like,
13170	5.6	4.66	5.46	30.34	38.99	31.43	26.43	49.2	42.25	29.27	17.68	25.2	6.7	13.89	1.62	3.79	5.66	70.5	64.42	63.6	Dbp	D site albumin promoter binding protein
13171	23.69	27.31	22.29	25.45	17.4	17.59	18.19	20.97	22.36	20.39	18.3	24.82	8.72	9.96	6.85	8.84	8.47	30.86	29.17	30.8	Dbt	dihydrolipoamide branched chain transacylase E2
13175	0.53	0	0	0	0	0	0	0.74	1.57	0	0	0.35	1.73	4.15	1.97	3.22	1.25	0.63	0.69	0	Dclk1	doublecortin-like kinase 1,doublecortin-like kinase 1,doublecortin-like kinase 1,doublecortin-like kinase 1,doublecortin-like kinase 1,doublecortin-like kinase 1,
13177	273.75	214.29	178.26	250.83	209.58	173.68	210.87	242.85	227.87	204.74	194.74	197.61	61.01	75.46	41.95	61.52	54.11	297.26	318.06	331.25	Dci	dodecenoyl-Coenzyme A delta isomerase (3,2
13178	0.94	1.39	0.85	1.77	1.57	0.96	1.21	2.91	0.69	1.38	1.42	2.11	2.28	2	3.19	1.84	3.63	0.69	2.06	2.06	Dck	deoxycytidine kinase
13179	252.18	260.19	227.96	322.86	204.66	230.92	202.86	335.28	288.76	328.04	292.37	367.61	508.13	520.69	422.02	509.96	538.11	330.08	360.23	325.65	Dcn	decorin,decorin,
13180	0	0.28	1.05	1.32	0.75	3.08	1.43	1.07	0	0.84	0.75	1.02	2.17	1.2	1.14	0	1.09	2.18	3.02	0.65	Pcbd1	pterin 4 alpha carbinolamine
13185	10.81	11.38	11.13	9.57	5.67	6.76	7.33	13.82	7.69	10.93	13.58	11.26	14.67	7.78	9.7	6.11	13.67	14.15	14.93	14.37	Dscr3	Down syndrome critical region protein A
13190	1.15	1.87	0.63	1.33	1.84	1.39	1.46	1.25	1.63	0.77	1.28	1.25	0.49	0.7	1.9	0.36	0.15	3.01	2.65	2.01	Dct	dopachrome tautomerase,dopachrome tautomerase,
13191	36.19	35.86	29.63	45.68	47.15	27.25	33.13	48.93	36.73	37.72	31.37	31.75	44.82	48.47	28.03	32.22	35.03	47.24	54.81	59.81	Dctn1	dynactin 1,dynactin 1,dynactin 1,
13194	49.27	56.02	48.46	62.46	67.71	73.98	69.76	82.65	73.4	76.03	62.66	80.19	91.52	96.27	79.03	96.3	89.45	70.85	71.83	68.7	Ddb1	damage specific DNA binding protein 1
13195	0.45	0.64	0.52	0.57	0.34	0.47	0.68	0.44	0.71	0.23	0.54	0.23	1.35	0.45	0.44	0.54	1.16	0.82	1.04	0.76	Ddc	dopa decarboxylase,dopa decarboxylase,
13196	3.64	6.18	3.88	7.45	10.33	6.8	7.06	7.61	6.5	6.6	8.54	6.85	11.49	14.21	11.31	11.33	11.91	9.04	7.83	6.88	Ddef1	development and differentiation enhancing,development and differentiation enhancing,development and differentiation enhancing,development and differentiation enhancing,development and differentiation enhancing,development and differentiation enhancing,
13197	10.52	3.9	6.22	14.59	10.21	9.82	13.9	15.8	10.81	15.67	12.68	11.19	3.77	6.25	1.56	2.48	4.86	9.03	10.94	15.34	Gadd45a	growth arrest and DNA-damage-inducible 45 alpha
13198	19.2	22.65	12.6	26.89	37.23	15.46	14.87	38.52	26.79	30.58	21.3	24.61	24.81	19.01	20.78	16.73	19.05	23.15	22.88	25.24	Ddit3	DNA-damage inducible transcript 3
13200	31.46	34.9	28.85	32.81	34.13	24.48	24.87	54.84	45.45	40.08	43.07	37.16	87.56	85.28	62.36	60.47	74.62	37.49	42.98	40.04	Ddost	dolichyl-di-phosphooligosaccharide-protein
13202	33.04	22.41	26.63	23.88	26.03	14.72	18.48	45.06	22.67	22.96	14.47	15.16	11.13	12.04	3.75	9.21	8.62	46.12	49.59	47.87	Ddt	D-dopachrome tautomerase
13204	15.85	17.16	20.68	23.09	26.74	41.94	35.99	21.72	33.08	32.68	31.64	35.68	24.34	40.48	32.99	37.26	30.71	15.5	16.37	14.53	Dhx15	DEAH (Asp-Glu-Ala-His) box polypeptide 15
13205	69.09	65.88	63.55	69.09	100.91	103.44	100.54	82.19	108.09	89.39	65.03	95.48	77.84	100.86	104.8	101.56	91.54	69.9	56.6	36.23	Ddx3x	DEAD/H (Asp-Glu-Ala-Asp/His) box polypeptide 3,
13206	0.14	0	0	0.16	0.11	0.26	0.31	0.31	0.23	0.62	0.55	0.57	0.03	0	0.25	0.11	0.05	0	0	0	Ddx4	DEAD (Asp-Glu-Ala-Asp) box polypeptide 4,DEAD (Asp-Glu-Ala-Asp) box polypeptide 4,
13207	165.94	146.6	185.8	231.16	157.21	201.65	185.14	158.98	226.71	253.86	238.85	295.73	161.94	227.83	221.77	258.01	220.18	150.81	141.99	117.47	Ddx5	DEAD (Asp-Glu-Ala-Asp) box polypeptide 5,DEAD (Asp-Glu-Ala-Asp) box polypeptide 5,DEAD (Asp-Glu-Ala-Asp) box polypeptide 5,DEAD (Asp-Glu-Ala-Asp) box polypeptide 5,
13209	24.05	33.29	38.05	41.29	33.63	38.08	32.38	29.84	41.03	40.53	35.52	45.33	26.25	31.77	34.6	33.51	30.39	33.78	28.09	26.52	Ddx6	DEAD (Asp-Glu-Ala-Asp) box polypeptide 6
13211	17.42	16.14	21.58	21.8	23.75	20.39	26.61	14.98	19.89	19.34	18.71	21.44	24.56	33.32	30	34.76	28.2	17.91	14.9	13	Dhx9	DEAH (Asp-Glu-Ala-His) box polypeptide 9,DEAH (Asp-Glu-Ala-His) box polypeptide 9,
13214	0	0	0	0.35	0	0	0	0	0	0	0	0	0.74	0	0	0	0.94	0	0.3	0	Defb1	beta-defensin 1
13218	0	0	0	0	0	0	0	0.16	0	0	0	0	0	0	0	0	0	0	0	0	Defcr-rs1	defensin related sequence cryptdin peptide
13237	0	0	0	0	0	0	0	0.21	0	0	0	0	0	0	0	0	0	0	0	0	Defcr3	defensin related cryptdin 3,defensin related cryptdin 3,
13244	24.21	23.71	26.68	27.05	25.44	28.2	23.43	39.09	34.03	34.56	36.82	38.51	57.33	57.56	62.31	61.13	65.38	34.4	34.55	28.66	Degs1	degenerative spermatocyte homolog 1,degenerative spermatocyte homolog 1,
13340	1.2	1.58	2.04	0.72	0.76	0.87	1	1.57	0.99	1.21	0.53	0.75	1.7	1.46	1.39	0.69	1.33	1.45	1.35	1.69	Slc29a2	solute carrier family 29 (nucleoside
13345	0	0	0.55	0.93	0.17	0.18	0.3	0.4	0.53	0.9	0.35	0.65	2.01	1.11	1.51	0.34	0.46	0.84	0.74	1	Twist2	twist homolog 2
13346	573.13	497.81	441.76	712.81	693.12	402.7	476.77	1124.71	741.25	824.4	649.18	671.09	1969.12	1676.02	1173.13	1057.24	1493.34	875.71	941.04	980.04	Des	desmin
13347	5.33	8.78	6.68	12.01	23.62	17.99	19.43	15.48	10.77	9.66	12.72	8.99	8.96	9.42	5.77	3.78	6.65	8.5	11.37	12.93	Dffa	DNA fragmentation factor, alpha subunit isoform
13349	0.13	0.18	0.2	0.15	0.24	0	0.29	0.28	0.4	0.12	0.45	0.37	1.06	0.26	1.18	0.33	0.78	0.28	0.35	0.33	Darc	Duffy blood group
13350	8.06	6	7.23	6.94	9.41	6.54	5.67	13.08	7.69	8.21	7.74	8.44	11.87	8.82	8.83	10.42	11.58	11.34	10.85	12.23	Dgat1	diacylglycerol O-acyltransferase 1
13353	24.55	18.63	15.51	20.55	17.93	15.64	17.42	36.16	20.13	24.51	24.59	17.6	17.97	19.5	10.54	10.59	12.03	23.19	33.85	32.3	Dgcr6	DiGeorge syndrome critical region gene 6
13356	11.39	16.4	13.7	14.31	19.81	15.89	15.08	23.26	15.71	13.28	13.46	12.64	15.84	11.65	13.7	8.99	12.06	19.26	22.86	21.68	Dgcr2	DiGeorge syndrome protein C,DiGeorge syndrome protein C,DiGeorge syndrome protein C,
13358	4.06	3.75	2.74	3.76	5.4	3.03	3.69	7.33	5.02	4.29	2.31	3.49	8.92	6.41	5.32	5.92	5.68	4.66	5.84	5.44	Slc25a1	solute carrier family 25, member 1
13360	4.99	5.57	4.49	3.76	3.43	2.25	2.56	3.74	2.18	2.37	1.92	2.53	5.41	3.65	4.08	3.44	5.1	4.14	4.84	4.34	Dhcr7	7-dehydrocholesterol reductase
13361	2.07	0.99	1.49	1.9	1.62	0.7	1.28	0.75	0.8	0	0.33	1.25	1.08	2.25	0.42	3.17	1.65	0.96	1.53	1.27	Dhfr	dihydrofolate reductase
13363	0.12	0.21	0.14	0.43	0.12	0.15	0.23	0.53	0.3	0.11	0.36	0.13	0.03	0.09	0.43	0.04	0.09	0.17	0.23	0.41	Dhh	desert hedgehog
13367	5.77	8.03	6.03	7.03	8.34	7.73	7	6.49	5.45	5.92	5.2	5.8	14.93	15.08	14.53	17.45	14.82	7.58	7.57	7.2	Diap1	diaphanous homolog 1,diaphanous homolog 1,
13368	1.7	2.06	1.53	2.72	2.36	1.47	1.81	26.29	14.64	20.21	20.38	20.27	2.15	3.46	1.19	2.69	1.68	3	3.74	2.73	Dffb	DNA fragmentation factor, beta subunit,DNA fragmentation factor, beta subunit,
13370	0	0	0	0	0	0	0	0	0	0	0	0	0	0	0	0.06	0	0	0	0	Dio1	deiodinase, iodothyronine, type I
13371	0.22	0.16	0.47	0.1	0.1	0.19	0.22	0.18	0.13	0.16	0	0.17	1.19	0.75	3.47	2.12	2.03	0.21	0.17	0.25	Dio2	deiodinase, iodothyronine, type II
13380	0	0	0	0	0	0.04	0	0	0	0	0	0	0	0	0	0	0	0	0	0	Dkk1	dickkopf homolog 1
13382	181.96	155.32	148.07	226	199.76	268.74	250.63	138	197.81	186.56	160.63	210.24	71.07	96.35	80.67	98.79	81.09	154.27	134.43	118.56	Dld	dihydrolipoamide dehydrogenase
13383	19.07	20.75	19.12	18.68	17.32	19.61	20.93	12.21	14.54	13.91	11.79	16.55	12.02	16.82	15.87	17.74	15.22	18.62	18.98	16.81	Dlg1	discs large homolog 1,discs large homolog 1,discs large homolog 1,discs large homolog 1,discs large homolog 1,discs large homolog 1,
13384	1.25	0.81	0.64	1.31	1.1	0.91	0.91	1.19	0.94	1.25	1.45	0.77	1.17	1.86	1.05	1.81	0.93	1.14	1.34	2.03	Mpp3	Mpp3 membrane protein, palmitoylated 3
13385	1.44	2.27	1.5	2.4	2	1.16	1.55	3.51	2.97	2.41	1.19	2.14	2.68	3.3	2.48	2.35	2.64	2.5	2.79	3.6	Dlg4	postsynaptic density protein 95,postsynaptic density protein 95,
13386	0.03	0.06	0	0	0.05	0	0	0	0	0	0.4	0.04	0.07	0	0	0	0.06	0	0	0	Dlk1	delta-like 1 homolog,delta-like 1 homolog,delta-like 1 homolog,
13388	1.85	1.09	1.5	1.03	1.44	1.16	1.35	2.19	2.16	2.01	2.1	1.6	0.59	0.52	0.67	0.45	0.64	2.74	2.37	1.74	Dll1	delta-like 1
13389	0.04	0	0	0	0	0	0	0	0	0	0	0	0.07	0	0	0	0	0	0.06	0	Dll3	delta-like 3
13390	0.05	0	0.19	0.07	0.08	0.08	0	0	0	0	0	0.09	0	0.3	0	0	0	0.4	0.13	0	Dlx1	distal-less homeobox 1,distal-less homeobox 1,
13392	0	0	0	0	0	0	0	0	0	0	0	0	0.04	0	0	0	0	0	0.05	0	Dlx2	distal-less homeobox 2
13394	0	0	0	0	0	0	0.07	0	0	0	0	0	0.11	0	0	0	0	0	0	0	Dlx4	distal-less homeobox 4
13395	0	0	0	0	0.08	0	0	0.14	0	0	0	0	0.33	0.62	0.37	0	0.17	0.23	0.26	0.28	Dlx5	distal-less homeobox 5 isoform 2
13396	0.04	0	0.31	0.06	0.07	0.17	0.14	0.28	0	0.15	0.05	0.13	0.35	0.13	0	0	0.09	0.24	0	0.11	Dlx6	distal-less homeobox 6,distal-less homeobox 6,
13400	186.18	167.9	168.13	260.45	318.24	194.91	209.76	346.69	251.04	265.36	236.77	201.48	120.78	147.77	101.39	80.19	90.95	311.04	330.19	366.37	Dmpk	dystrophia myotonica-protein kinase,dystrophia myotonica-protein kinase,
13401	17.27	13.96	14.69	16.86	23.2	16.38	16.03	26.54	20.87	18.53	18.09	15.1	16.98	18.15	9.98	14.13	12.56	25.25	24.18	28.69	Dmwd	dystrophia myotonica-containing WD repeat motif,dystrophia myotonica-containing WD repeat motif,dystrophia myotonica-containing WD repeat motif,
13404	0	0	0.11	0	0	0	0	0.08	0	0	0	0	0	0	0.36	0	0.03	0	0	0	Dmc1	disrupted meiotic cDNA 1 homolog,disrupted meiotic cDNA 1 homolog,
13405	7.08	11.79	8.54	12.69	9.43	13.38	11.97	4.46	8.86	7.89	5.96	8.65	8.29	7.95	11.38	7.11	9.83	9.22	7.56	7.62	Dmd	dystrophin, muscular dystrophy
13406	0	0	0.05	0	0.02	0.02	0	0.23	0.14	0	0	0	0.18	0.26	0.44	0.09	0.07	0	0	0.03	Dmp1	dentin matrix protein 1
13411	0	0.02	0	0	0.01	0.01	0	0	0.01	0	0.04	0	0.01	0.01	0	0.03	0.03	0.01	0	0	Dnahc11	dynein, axonemal, heavy chain 11
13417	0.03	0.09	0.04	0.04	0.05	0.02	0.04	0.03	0.02	0.04	0.11	0.02	0.04	0.05	0.02	0.03	0.08	0.07	0.05	0.03	Dnahc8	dynein, axonemal, heavy chain 8,dynein, axonemal, heavy chain 8,
13418	7.96	6.11	7.51	11.43	10.88	11.04	11.2	7.49	9.56	10.46	7.61	11.35	10.01	16.46	12.21	12.86	10.16	8.04	7.87	8.1	Dnajc1	DnaJ (Hsp40) homolog, subfamily C, member 1,DnaJ (Hsp40) homolog, subfamily C, member 1,
13419	1.05	1.52	0.91	1.08	1.31	1.11	1.07	0.69	1.56	1.41	0.68	0.88	0.36	0.17	0.72	0.54	0.39	1.57	1.3	1.41	Dnase1	deoxyribonuclease I,deoxyribonuclease I,deoxyribonuclease I,
13421	0.1	0.45	0.05	0.23	0.6	0.42	0.42	0.74	0.58	0.53	0.06	0.32	0.11	0.15	0.04	0.24	0.55	0.4	0.38	0	Dnase1l3	deoxyribonuclease 1-like 3 precursor
13423	4.98	4.31	2.87	4.17	3.79	1.92	2.48	5.81	3.55	3.67	6.15	4.61	9.15	6.66	11.21	5.54	7.76	5.52	5.77	4.86	Dnase2a	deoxyribonuclease II alpha
13424	24.81	34.06	24.86	39.5	40.14	32.65	34.12	44.47	36.16	38.68	33.36	37.22	39.59	42.25	38.02	28.14	33.8	41.4	37.58	47.55	Dync1h1	dynein, cytoplasmic, heavy chain 1
13426	0	0	0	0.02	0.04	0	0.05	0.03	0	0.04	0	0.03	0.08	0	0.18	0	0.13	0	0	0.07	Dync1i1	dynein cytoplasmic 1 intermediate chain 1,dynein cytoplasmic 1 intermediate chain 1,dynein cytoplasmic 1 intermediate chain 1,
13427	30.32	23	28.64	27.18	22.35	29.82	30.62	24.55	18.61	21.97	24	24.75	44.15	38.81	50.7	50.34	49.59	27.13	27.07	27.13	Dync1i2	dynein cytoplasmic 1 intermediate chain 2,dynein cytoplasmic 1 intermediate chain 2,dynein cytoplasmic 1 intermediate chain 2,dynein cytoplasmic 1 intermediate chain 2,
13429	2.41	3.37	2.5	5.04	5.27	3.21	2.83	6.5	3.33	2.83	4.37	3.76	6.36	6.21	6.16	3.78	5.78	4.81	5.6	4.73	Dnm1	dynamin,dynamin,dynamin,
13430	20.19	18.59	17.89	24.57	28.13	24.25	25.29	42.16	26.76	33.25	26.16	27.55	34.62	47.5	26.02	29.31	27.89	25.74	26.67	31.57	Dnm2	dynamin 2,dynamin 2,dynamin 2,dynamin 2,dynamin 2,
13433	2.96	5.28	3.97	5.13	6.12	5.22	5.05	5.85	3.77	3.92	3.05	3.96	8.51	10.27	6.84	7.22	7.53	5.98	6.24	7.23	Dnmt1	DNA methyltransferase (cytosine-5) 1,DNA methyltransferase (cytosine-5) 1,DNA methyltransferase (cytosine-5) 1,DNA methyltransferase (cytosine-5) 1,DNA methyltransferase (cytosine-5) 1,
13434	2.18	2.97	2.44	3.02	1.86	3.53	2.82	0.77	2.95	2.48	3.01	2.29	3.25	3.11	3.38	5.65	4.17	2.31	1.69	1.93	Trdmt1	tRNA aspartic acid methyltransferase 1
13435	4.99	8.75	7.8	9.35	11.99	9.6	8.51	11.25	9.27	11.45	10.46	9.17	5.49	5.3	3.59	4.06	4.76	9.26	10.26	9.21	Dnmt3a	DNA methyltransferase 3A isoform 2
13436	0.43	0.36	0.56	0.52	0.91	0.56	0.55	0.49	0.61	0.47	0.34	0.3	0.92	0.46	0.33	1.2	0.86	0.68	0.39	0.33	Dnmt3b	DNA methyltransferase 3B isoform 3,DNA methyltransferase 3B isoform 3,
13437	33.65	26.24	28.14	32.57	31.32	26.3	25.84	44.23	27.1	28.61	30.13	23.73	31.07	24.07	21.23	22.45	25	40.43	50.82	52.7	Dnpep	aspartyl aminopeptidase,aspartyl aminopeptidase,aspartyl aminopeptidase,
13445	65.98	65.9	54.3	60.99	94.59	36.2	43.55	111.22	50.43	58.98	57.52	51.4	96.98	85.91	39.27	85.67	81.34	105.85	114.61	131.97	n/a	n/a
13446	0.29	0.13	0.25	0.06	0.24	0.13	0.13	1.12	0.49	0.13	0.36	0.34	0.08	0.34	0.51	0.54	0.28	0.13	0.05	0.47	Doc2a	double C2, alpha
13447	0	0.06	0.03	0.05	0.17	0.24	0.17	0.14	0.1	0.13	0.17	0.09	0.45	1.45	0.19	0.5	0.42	0.12	0.14	0.15	Doc2b	double C2, beta
13448	1.15	0.69	1.6	1	1.96	0.91	1.02	1.73	1.33	1.45	1.13	1.06	11.94	9.29	10.19	10.02	10.36	1.45	1.27	1.8	Dok1	docking protein 1
13449	0.57	1.15	0.52	0.74	1.91	0.57	0.34	2.08	1.69	1.58	1.28	0.7	4.3	6.97	2.6	4.29	4.35	0.49	1.18	0.76	Dok2	docking protein 2
13476	198.36	200.78	146.79	129.06	83.31	93.73	97.14	200.8	133.61	105.01	151.12	92.18	186.42	129.1	118.33	167.76	158.45	183.85	193.84	200.35	Reep5	receptor accessory protein 5
13478	9.9	10.91	7.78	9.72	13.95	7.45	6.78	10.16	8.38	9.52	6.8	9.65	15.17	10.03	11.4	11.38	13.14	14.01	11.07	12.06	Dpagt1	UDP-N-acetylglucosamine-dolichyl-phosphate,UDP-N-acetylglucosamine-dolichyl-phosphate,
13479	11.85	11.61	11.7	18.7	9.77	6.8	8.82	12.66	14.17	26.4	21.88	23.74	71.74	50.26	57.44	48.15	62.8	13.63	16.04	25.95	Dpep1	dipeptidase 1 (renal),dipeptidase 1 (renal),
13480	36.04	21.93	37.26	42.65	33.4	43.68	44.58	25.05	30.71	37.88	43.17	34.09	34.63	35.91	41.03	40.55	37.07	24.78	23.44	17.05	Dpm1	dolichol-phosphate (beta-D) mannosyltransferase
13481	9.77	7.92	9.47	4.93	6.41	4.71	13.76	9.32	7.07	3.54	11.87	4.32	14.14	8.46	14.44	11.58	7.96	8.7	8.79	8.57	Dpm2	dolichol-phosphate (beta-D) mannosyltransferase
13482	0.32	1.75	1.31	1.15	1.09	1.07	1.51	0.55	0.84	0.8	0.6	0.73	0.59	0.27	1.36	1.04	0.93	1.28	0.71	0.42	Dpp4	dipeptidylpeptidase 4,dipeptidylpeptidase 4,
13483	0.04	0.28	0.04	0.05	0.07	0.07	0	0.18	0.13	0	0.08	0.01	0	0.03	0	0	0.05	0.15	0.11	0.43	Dpp6	dipeptidylpeptidase 6,dipeptidylpeptidase 6,dipeptidylpeptidase 6,dipeptidylpeptidase 6,dipeptidylpeptidase 6,
13486	11.23	8.61	8.42	15.21	10.78	11.44	8.64	10.79	14.07	11.13	11.74	14.03	15.04	19.04	17.31	13.8	17.05	10.86	11.05	8.35	Dr1	down-regulator of transcription 1
13487	0	0	0	0	0	0.02	0	0.14	0.06	0.36	0.2	0.27	0	0	0	0.02	0.02	0	0	0	Slc26a3	solute carrier family 26, member 3,solute carrier family 26, member 3,solute carrier family 26, member 3,
13488	0	0.09	0.02	0.15	0.26	0	0.04	0	0	0.09	0.03	0.16	0.11	0.3	0	0.47	0.27	0.14	0	0.07	Drd1a	dopamine receptor D1A
13489	0.15	0.05	0.45	0.29	0.17	0.33	0.15	0.53	0.39	0	0.07	0.17	1.33	2.01	1.19	2.27	1.09	0.52	0.57	0.25	Drd2	dopamine receptor 2
13490	0	0	0.06	0	0	0	0	0	0	0	0	0	0	0	0	0	0	0	0	0	Drd3	dopamine receptor 3
13491	0	0	0	0	0	0	0	0.17	0	0.06	0.04	0.12	0	0	0	0	0.02	0	0	0	Drd4	dopamine receptor 4
13492	0	0	0	0	0	0	0	0	0	0	0	0	0	0	0.02	0	0	0	0	0	Drd5	dopamine receptor 5
13494	19.85	16.75	20.22	18.57	18.66	15.86	17.05	18.2	18.37	17.6	16.52	22.15	20.85	25.1	32.1	27.31	29.62	16.73	17.69	14.72	Drg1	developmentally regulated GTP binding protein 1
13495	14.16	13.83	10.58	14.17	10.3	10.6	12.53	17.95	13.94	12.29	13.7	13.63	13.64	16.4	10.51	10.34	11.3	15.28	18.42	17.58	Drg2	developmentally regulated GTP binding protein 2
13496	0.23	0.5	0.3	0.6	0.66	0.51	0.45	0.55	0.37	0.3	0.84	0.53	1.52	2.12	2.07	1.52	1.63	0.44	0.22	0.65	Arid3a	dead ringer homolog 1,dead ringer homolog 1,dead ringer homolog 1,
13497	0.14	0.14	0.06	0.05	0.14	0.17	0.13	0.25	0.09	0.11	0.11	0.07	0.41	0.14	0.17	0.22	0.38	0.09	0.18	0.02	Drp2	dystrophin related protein 2,dystrophin related protein 2,dystrophin related protein 2,
13498	12.08	11.06	13.05	9.89	17	7.49	9.46	25.16	13.07	14.99	14.49	10.33	21.03	24.58	12.03	13.71	15.37	18.73	21.6	23.6	Atn1	dentatorubral pallidoluysian atrophy,dentatorubral pallidoluysian atrophy,dentatorubral pallidoluysian atrophy,
13505	0	0	0	0	0	0	0.01	0	0	0	0	0	0	0	0.11	0	0	0	0.04	0	Dsc1	desmocollin 1,desmocollin 1,desmocollin 1,
13506	10	11.96	14.58	9.31	7.18	9.63	7.88	6.45	11.07	9.08	10.09	11.18	11.99	17.85	12.85	17.05	14.36	12.85	10.71	8.99	Dsc2	desmocollin 2
13507	0	0	0	0	0	0	0	0	0	0	0	0	0	0.09	0	0.11	0	0	0	0	Dsc3	desmocollin 3
13508	0	0	0.04	0.02	0	0	0	0	0	0	0	0.02	0.01	0	0	0.04	0.02	0.01	0	0.02	Dscam	Down syndrome cell adhesion molecule
13511	9.52	13.51	11.1	11.43	11.2	9.59	10.4	9.34	11.98	9.99	8.81	9.39	14.08	20.59	13.35	16.59	14.08	13.55	13.39	12.93	Dsg2	desmoglein 2,desmoglein 2,
13512	0.05	0	0.13	0.08	0.01	0.07	0.04	0	0	0.02	0	0.02	0.01	0	0	0	0.01	0.05	0	0.02	Dsg3	desmoglein 3
13516	0.17	1.53	0.57	0.58	0.34	0.73	0.96	0.7	0.62	0.53	0.46	0.41	0.27	0.52	0.74	0.61	0.52	0.3	0.22	0.24	Epyc	epiphycan,epiphycan,
13518	27.21	48.51	29.22	47.41	38.1	27.3	29.09	38.87	37.91	41.35	31.48	39.32	27.49	27.9	24.12	17.88	25.35	43.86	39.81	53.32	Dst	dystonin isoform a
13521	0.73	2.55	1.73	1.9	2.55	1.66	1.98	1.73	2.44	1.34	1.89	1.65	2.66	2.5	3.84	2.19	2.78	2.4	2.29	1.93	Slc26a2	solute carrier family 26 (sulfate transporter),
13527	21.09	30.48	17.11	24.82	22.73	15.9	15.49	18.48	20.29	17.66	14.41	19.76	20.96	20.8	26.12	21.3	23.84	25.74	28.73	24.14	Dtna	dystrobrevin alpha isoform 2
13531	0	0	0.04	0	0	0	0	0.03	0	0	0	0	0	0.13	0	0	0	0	0	0	Dub1	deubiquitinating enzyme 1
[truncated: 14,045 more rows]

## Sheet: CELF1 muscle
CELF1 induction in muscle
#Gene	Celf1muscle_12h_100111_A4346	Celf1muscle_12h_100115_A4331	Celf1muscle_12h_100115_A4403	Celf1muscle_12h_100911_A4331	Celf1muscle_12h_100911_A4403	Celf1muscle_24h_100111_A4349	Celf1muscle_24h_100119_A4404	Celf1muscle_24h_100119_A4414	Celf1muscle_72h_100111_A4372	Celf1muscle_72h_100115_A4408	Celf1muscle_72h_100421_A3561	Celf1muscle_72h_100911_A4408	Celf1muscle_7dy_100115_A4411	Celf1muscle_7dy_100119_A4380	Celf1muscle_7dy_100119_A4387	Celf1muscle_ctl_100111_A3559	Celf1muscle_ctl_100111_A4374	Celf1muscle_ctl_100111_A4393	Symbol	Desc
100009600	0	0.16	0.29	0.15	0.03	0.12	0.05	0.06	0.5	0.3	0.18	0.28	0.42	0.26	0.46	0.23	0.21	0.26	Glp1	GATA like protein-1
100012	0	0	0	0	0	0	0	0	0.05	0.04	0	0.12	0.13	0	0	0	0	0	Oog3	oogenesin 3
100017	2.89	3.1	2.53	2.24	2.14	3.67	3.32	1.88	2.71	2.01	1.1	1.52	5.41	9.09	4.81	0.89	3.02	2.75	Ldlrap1	low density lipoprotein receptor adaptor protein
100019	1.05	1.01	1.05	1.11	0.97	0.94	1	0.94	0.98	1.22	1.62	1.47	1.66	2.55	1.59	0.9	0.98	0.67	Mdn1	midasin
100034251	0	1.91	1.41	1.3	1.21	1.35	1.26	2.53	2.36	1.76	1.27	1.78	42.52	180.58	22.85	2.25	0.83	0.51	OTTMUSG00000000971	extracellular proteinase inhibitor family
100034361	57.22	39.33	43.26	38.67	43.25	51.58	32.07	35.46	66.29	68.84	90.96	66.37	75.13	57.54	51.37	52.35	58.45	43.19	Mfap1b	microfibrillar-associated protein 1B
100034684	0	0	0	0	0	0	0	0	0	0	0	0	0	0.44	0	0	0	0	BC100530	stefin A-like protein
100037258	10.53	10.34	9.8	10.61	11.56	9.29	6.26	10.03	12.39	12.29	8.22	13.14	24.56	39.73	19.91	9.53	10.47	9.51	Dnajc3a	DnaJ (Hsp40) homolog, subfamily C, member 3B
100037282	29.66	34.21	27.74	33.72	28.92	32.29	21.14	32.24	42.65	42.85	29.28	41.04	55.77	37.81	45.22	43.77	30.45	22.42	Rshl2b	radial spokehead-like 2B
100038859	0.25	0.23	0.35	0.12	0.17	0.04	0.11	0.2	0.11	0.21	0.45	0.17	0.19	0	0.13	0.56	0.37	0.14	Olfr55	olfactory receptor 55
100038875	173	165.5	157.5	184.05	167.79	156.1	167.17	123.6	279.72	251.83	159.58	284.25	342.62	527.04	229.73	137.09	166.43	142.35	n/a	n/a
100038977	0	0	0	0	0	0	0	0	0	0	0	0	0	0.06	0	0	0	0	LOC100038977	hypothetical protein LOC100038977,hypothetical protein LOC100038977,
100038993	33.55	27.71	29.65	19.28	27.61	36.74	23.5	25.03	38.59	33.9	11.38	28.05	50.04	64.17	46.85	29.39	34.05	20.02	n/a	n/a
100039065	0	0	0	0	0	0	0	0	0.1	0	0	0	0	0	0	0	0	0	LOC100039065	hypothetical protein LOC100039065
100039672	7.9	7.65	9.38	6.15	7.38	7.01	10.28	7.73	3.4	5.71	4.61	5.67	7.15	9.26	7.38	5.75	6.4	5.46	LOC100039672	hypothetical protein LOC100039672
100039781	1.78	3.65	1.39	1.79	1.42	3.07	2.61	2.98	0.82	3.85	1.83	1.68	2.1	4.43	1.24	1.97	1.14	0.69	3830408D24Rik	hypothetical protein LOC100039781
100039968	0.47	0.29	0.39	0.22	0.3	0.62	0.39	1.27	0.4	0.82	0.64	0.46	1.65	0.71	0.94	0.83	0.68	0.24	LOC100039968	hypothetical protein LOC100039968
100040606	0	0	0	0	0.01	0	0	0	0	0	0	0	0	0	0	0	0	0	LOC100040606	hypothetical protein LOC100040606
100040843	0.06	0	0	0	0	0	0	0	0	0	0.02	0	0.04	0.04	0	0	0	0	Cyp4a32	cytochrome P450, family 4, subfamily a,
100041379	0.18	0.31	0.61	0.99	0.51	0.3	0.56	0.69	0.12	0.08	0.26	0.43	0.67	0.66	0.54	0.16	0.45	0.8	OTTMUSG00000011070	hypothetical protein LOC100041379
100041488	0	0	0	0.1	0	0	0	0	0	0	0	0	0.12	7.91	0	0	0	0	LOC100041488	hypothetical protein LOC100041488
100041581	0	0	0	0.04	0.04	0.04	0	0.02	0.03	0	0.01	0.02	0.13	0.04	0	0.05	0.05	0	LOC100041581	similar to novel zinc finger protein (probable
100041724	0	0	0.14	0	0	0	0	0	0.1	0.29	0	0	0	0	0.13	0	0.1	0	LOC100041724	hypothetical protein LOC100041724
100042109	0	0	0	0.05	0	0	0	0	0.06	0	0	0	0	0.17	0	0	0	0	LOC100042109	hypothetical protein LOC100042109,hypothetical protein LOC100042109,hypothetical protein LOC100042109,hypothetical protein LOC100042109,hypothetical protein LOC100042109,
100042175	0	0	0	0.01	0	0	0	0	0	0	0	0	0	0.02	0	0	0	0	LOC100042175	hypothetical protein LOC100042175,hypothetical protein LOC100042175,hypothetical protein LOC100042175,hypothetical protein LOC100042175,
100042499	0.91	0.42	0.59	0.69	0.43	0.73	0.76	0.32	0.64	0.98	1.7	1.24	0.75	0.79	0.93	1.12	0.98	1.19	Vmn2r55	vomeronasal receptor Vmn2r55
100043123	1.01	0.77	2.81	2.02	2.54	1.94	2.31	3.02	2.77	5.19	1.34	4.39	23.96	36.01	13.9	0.67	1.49	1.54	n/a	n/a
100043381	16.9	13.56	23.17	19.22	29.86	18.56	15.06	13.59	13.68	17.74	17.4	24.16	18.35	9.66	13.3	11.91	24.39	21.63	LOC100043381	hypothetical protein LOC100043381,hypothetical protein LOC100043381,hypothetical protein LOC100043381,hypothetical protein LOC100043381,hypothetical protein LOC100043381,hypothetical protein LOC100043381,hypothetical protein LOC100043381,hypothetical protein LOC100043381,
100043387	16.33	13.34	22.91	18.45	29.07	17.24	14.3	12.4	13.37	16.87	16.76	23.64	17.41	8.82	13.02	11.3	23.55	21.05	LOC100043387	similar to novel KRAB box and zinc finger, C2H2,similar to novel KRAB box and zinc finger, C2H2,
100043757	0	0	0	0.01	0.01	0.01	0	0	0	0	0	0.01	0.01	0.06	0.02	0.01	0	0	Rp23-45p4.1	hypothetical protein LOC100043757
100043861	0	0	0	0	0	0	0	0	0	0	0	0	0	0	0	0	0.08	0	Klrb6	natural killer lectin-like receptor protein 1 e
100043868	0	0	0	0	0	0	0	0	0	0	0.1	0	0	0	0	0	0	0	LOC100043868	hypothetical protein LOC100043868
100043899	0	0	0	0.07	0	0	0	0	0	0	0	0	0.23	0.14	0	0	0	0	LOC100043899	hypothetical protein LOC100043899
100061	0	0	0	0	0.07	0	0	0	0.04	0	0.04	0	0	0	0.09	0	0	0	Lrrc19	leucine rich repeat containing 19,leucine rich repeat containing 19,
100066	0.06	0	0	0	0.01	0	0	0	0	0	0.02	0	0	0.03	0	0	0	0	Cyp2j11	cytochrome P450, family 2, subfamily j,
100072	1.05	1.85	1.04	1.65	0.93	1.48	1.33	2.11	0.9	1.15	0.98	1.13	2.09	1.39	1.63	1.24	1.45	1.25	n/a	n/a
100087	9.91	11.35	10.06	10.27	6.98	7.3	9.79	8.1	7.3	6.77	3.45	5.22	11.38	16.63	13.26	9.23	10.01	6.74	Kti12	KTI12 homolog, chromatin associated
100088	2.79	2.64	3.11	2.73	3.46	3.23	3.48	3.03	9.65	12.15	6.13	11.48	10.17	21.33	11.87	2.48	3.18	3.32	Rcc1	regulator of chromosome condensation 1,regulator of chromosome condensation 1,
100090	1.35	1.63	1.37	0.95	1.01	0.98	1.7	1.52	1.99	2.88	0.63	1.9	2.42	5.93	3.16	0.88	1.33	0.85	Zbtb48	GLI-Kruppel family member HKR3
100101806	127.94	119.53	118.2	133.46	147.1	118.9	56.75	112.55	108.66	85.7	110.64	92.62	171.2	135.1	118.13	157.69	115.19	153.78	Srp54c	signal recognition particle 54C,signal recognition particle 54C,
100102	0.04	0	0	0.03	0.03	0	0.02	0	0.02	0.23	0.01	0.13	0.16	0.39	0	0.02	0.06	0	Pcsk9	proprotein convertase subtilisin/kexin type 9
100113398	0.61	0.25	0.31	0.37	0.19	0.36	0.66	0.4	0.78	0.79	0.2	0.47	0.91	3.25	1.07	0.18	0.23	0.24	Adat3	tRNA-specific adenosine deaminase 3
100121	3.46	3.74	2.84	3.87	3.38	3.66	3.67	3.54	8.04	7	2.76	8.16	9.89	13.21	10.15	3.94	3.42	3.34	Tdrd7	tudor domain containing 7,tudor domain containing 7,tudor domain containing 7,
100125586	0	0.04	0.08	0.02	0.01	0	0.03	0.03	0.03	0.04	0.01	0	0	0.04	0.04	0	0.06	0.07	Vmn2r2	vomeronasal receptor Vmn2r2
100129	1.27	1.25	0.77	1.11	1.14	1.07	1.71	2.04	1.48	1.49	0.57	1.49	3.67	8.13	3.18	0.72	0.9	1	Gpr153	G protein-coupled receptor 153
100163	0.92	0.87	0.72	0.76	0.52	0.35	0.78	0.36	1.22	2.25	2.44	1.74	2.52	4.05	4.07	0.62	0.37	1	Pafah2	platelet-activating factor acetylhydrolase 2,platelet-activating factor acetylhydrolase 2,platelet-activating factor acetylhydrolase 2,
100169	3.65	3.06	3.62	3.75	3.58	2.48	3.71	4.35	4.79	4.99	3.93	6.33	4.9	8.48	6.54	3.19	3.42	3.36	Phactr4	phosphatase and actin regulator 4,phosphatase and actin regulator 4,
100177	1.28	1.34	1.16	1.71	1.73	2.14	2.11	1.64	2.74	2.78	1.85	2.83	4.09	3.18	3.16	2.57	1.6	1.71	Zmym6	zinc finger, MYM-type 6,zinc finger, MYM-type 6,zinc finger, MYM-type 6,
100182	0.74	0.47	0.64	0.66	0.66	0.59	0.69	0.86	0.59	0.67	0.24	0.69	1.37	4.67	1.7	0.3	0.65	0.47	Akna	AT-hook transcription factor,AT-hook transcription factor,AT-hook transcription factor,
100198	9.06	7.66	9.68	6.52	8.41	10.51	11.86	13.86	2.09	4.61	2.05	3.63	8.66	20.25	11.38	9.36	9.84	6.94	H6pd	hexose-6-phosphate dehydrogenase (glucose,hexose-6-phosphate dehydrogenase (glucose,
100201	24.92	23.73	25.9	23.07	24.1	21.35	26.56	20.67	12.63	18.25	14.64	16.57	18.37	11.36	18.82	25.24	26.68	20.79	Tmem64	transmembrane protein 64
100206	4.61	4.03	4.63	3.9	3.99	5.17	4.06	4.48	8.45	6.77	3.12	5.66	10.42	15.14	9.72	3.17	4.28	2.36	Adprhl2	ecto ADP-ribosylhydrolase
100210	3.46	3.52	3.24	2.82	2.34	3.25	2.8	2.28	5.69	5.88	2.11	5.35	7.28	12.15	5.63	3.97	2.84	1.68	Atpbd1b	ATP binding domain 1 family, member B
100213	7.72	8.24	7.42	6.51	5.74	10.45	10.77	11.92	5.18	6.14	2.31	4.71	10.47	15.48	10.22	5.45	9.06	4.59	Rusc2	RUN and SH3 domain containing 2
100226	11.88	15.38	15.6	15.91	15.29	13.13	12.07	15.47	8.87	10.4	5.63	10.94	26.06	32.06	19.82	18.76	16.81	18.88	Stx12	syntaxin 12,syntaxin 12,
100273	35.97	28.37	34.23	32.3	39.53	32.38	33.24	33.76	21.59	20.91	21.76	25.88	36.54	44.09	30.07	27.59	32.41	34.8	Osbpl9	oxysterol binding protein-like 9 isoform a,oxysterol binding protein-like 9 isoform a,
100317	10.42	8.94	8.92	10.42	10.25	9.47	10.88	10.04	6.14	5.49	8.74	6.18	11.2	9.69	8.38	8.86	10.23	7.61	AU040320	polycystic kidney disease 1-like isoform 2
100336	6.79	6.57	6.28	6.2	5.71	7.1	6.44	7.37	10.72	12.38	4.39	11.06	13.61	18.77	12.7	6.43	6.67	5.05	Ppp1r8	protein phosphatase 1, regulatory (inhibitor)
100340	0.33	0.23	0.13	0.26	0.43	0.66	0.43	0.64	0.66	1	0.6	0.56	2.19	2.03	1.53	1	0.49	0.3	Smpdl3b	sphingomyelin phosphodiesterase, acid-like 3B
100342	0.3	0.25	0.34	0.15	0.3	0.6	0.85	0.88	0.54	0.7	0.6	0.42	1.42	1.88	1.86	0.6	0.39	1.18	4732473B16Rik	hypothetical protein LOC100342
100383	16.54	12.52	14.4	13.46	13.85	17.92	15.18	15.8	26.27	29.81	15.21	28.21	21.77	26.59	25.96	13.36	15.96	13.87	Bsdc1	BSD domain containing 1
100434	5.56	5.73	7.75	6.58	8.69	5.2	6.73	6.23	3.57	4.15	5.69	5.06	9.26	16.85	8.82	6.55	6.11	7.52	Slc44a1	solute carrier family 44, member 1,solute carrier family 44, member 1,solute carrier family 44, member 1,
100465	1.07	0.93	0.91	1.61	1.27	0.66	1.03	1.26	1.5	2.49	1.32	1.51	3.37	4.89	2.65	0.59	2.69	0.22	Mobkl2c	MOB1, Mps One Binder kinase activator-like 2C
100470	0	0	0	0	0	0.14	0.1	0.17	0.05	0.14	0	0.05	0.1	0.4	0.21	0.05	0	0.18	Lao1	L-amino acid oxidase 1
100494	4.23	3.47	3.08	3.17	5.23	4.23	5.64	4.34	21.02	28.57	16.45	29.83	17.26	22.88	22.08	2.34	3	2.02	Zfand2a	zinc finger, AN1-type domain 2A,zinc finger, AN1-type domain 2A,
100515	0.63	0.86	0.74	0.98	0.81	0.55	0.78	0.69	0.2	0.61	0.39	0.5	0.98	1.49	0.86	0.61	0.66	1.01	6820424L24Rik	hypothetical protein LOC100515
100532	4.79	4.71	4.78	4.52	4.43	5.05	5.04	7.64	5.33	6.61	2.72	5.69	11.09	18.41	12.05	3.63	7.07	3.77	Rell1	RELT-like 1
100535	0	0	0	0	0	0.04	0	0	0	0	0	0.02	0	0	0.05	0	0	0	Oas1d	2'-5' oligoadenylate synthetase 1D
100561	3.47	3.72	2.74	2.88	2.61	2.75	2.86	3.23	3.77	4.36	3.82	3.74	7.79	8.66	6.91	4.56	2.44	3.21	Slc15a4	solute carrier family 15, member 4
100604	2.62	2.15	2.06	2.97	1.57	2.83	2.86	3.53	1.95	2.12	1.83	2.29	4.3	12.15	5.14	2.27	1.82	2.1	Lrrc8c	AD158
100608	5.97	5.79	5.76	5.52	6.1	4.66	6.5	5.71	3.94	5.54	2.16	5.21	7.66	15.51	9.05	5.69	6.23	5.35	Noc4l	nucleolar complex associated 4 homolog
100609	4.13	5.13	3.64	4.04	3.26	2.66	4.51	4.33	6.72	8.95	4.12	7.9	6.57	12.89	7.86	2.87	4.52	3.68	Nsun5	NOL1/NOP2/Sun domain family, member 5
100637	1.03	1.51	0.67	1.16	1.3	0.4	1.24	1.02	0.76	0.35	0.41	0.53	0.73	1.14	0.3	0.94	1.68	1.06	B230342M21Rik	hypothetical protein LOC100637,hypothetical protein LOC100637,
100647	0	0	0	0	0	0	0	0.12	0	0.15	0	0.06	0	0.13	0.07	0	0	0	Upk3b	uroplakin 3B
100678	6.58	7.13	5.33	5.78	4.87	7.63	6.78	4.4	5.08	7.44	3.44	5.64	10.8	5.8	6.49	5.55	7.75	7.82	Psph	phosphoserine phosphatase
100683	2.95	3.09	3.43	3.22	3.24	2.97	3.62	3.63	3.56	4.51	2.12	4.31	5.65	8.41	6.12	2.71	3.48	1.96	Trrap	transformation/transcription domain-associated,transformation/transcription domain-associated,
100689	3.32	2.13	3.17	2.52	3.11	0.53	1.23	0.76	0.63	1.1	0.52	0.85	1.57	1.6	0.5	0.44	0.86	0.85	Spon2	spondin 2, extracellular matrix protein
100702	9.15	7.52	12.18	6.55	14.7	14.42	8.01	11.42	8.92	7.78	11.01	8.37	7.1	5.81	10.56	16.63	8.23	17.26	Mpa2l	macrophage activation 2 like
100705	46.45	45.17	49.76	41.12	44.17	44.12	49.97	50.64	23.01	33.29	35.51	29.73	28.1	15.66	35.98	44.94	52.02	29.74	Acacb	acetyl-Coenzyme A carboxylase beta,acetyl-Coenzyme A carboxylase beta,
100710	6.84	8.36	7.18	10.28	8.91	6.33	5.66	8.27	2.53	3.05	4.51	3.46	5.48	6.55	5.69	9.15	9.15	8.6	Pds5b	PDS5, regulator of cohesion maintenance, homolog,PDS5, regulator of cohesion maintenance, homolog,PDS5, regulator of cohesion maintenance, homolog,
100715	3.53	4.46	4.71	5.14	4.68	3.64	3.76	4.65	5.47	6.38	5.17	6.88	9.79	16.76	7.81	4.24	3.13	4.16	Papd4	PAP associated domain containing 4,PAP associated domain containing 4,
100732	38.68	37.87	33.02	39	38.16	29.99	36.33	38.82	47.48	45.96	19.77	48.57	54.02	34.86	59.59	48.89	33.67	36.21	Mapre3	APC-binding protein EB2
100737	2.54	2.24	2.62	1.98	2.47	2.01	3.25	2.29	3.42	2.82	2.14	4.62	4.91	5.19	4.74	2.52	3.47	4.15	Dcun1d4	DCN1, defective in cullin neddylation 1, domain,DCN1, defective in cullin neddylation 1, domain,
100756	3.52	2.66	3.48	2.02	3.05	4.48	3.75	2.96	7	5.6	2.53	5.91	6.03	6.93	6.28	2.67	2.69	1.38	Usp30	ubiquitin specific peptidase 30
100763	11.99	14.12	13.43	14.62	15.01	12.44	12.89	13.94	11.47	9.97	8.82	12.7	18.79	19.04	19.32	14.54	14.8	12.83	Ube3c	ubiquitin protein ligase E3C,ubiquitin protein ligase E3C,
100764	1.85	1.63	1.45	1.44	1.52	0.99	1.74	2.38	2.49	2.67	0.81	1.41	3.25	3.54	2.92	1.47	1.75	0.71	1110008J03Rik	hypothetical protein LOC100764
100855	3.3	3	4.26	3.3	3.41	3.52	3.09	3.08	4.61	5.99	4.06	5.93	7.65	14.91	8.14	3.61	3.11	2.4	Tbc1d14	TBC1 domain family, member 14,TBC1 domain family, member 14,TBC1 domain family, member 14,TBC1 domain family, member 14,TBC1 domain family, member 14,
100900	5.16	5.9	5.33	6.57	4.5	6.65	7.79	4.56	9.9	8.61	8.43	8.06	9.37	9.9	7.59	5.34	3.26	3.89	Hscb	J-type co-chaperone HSC20
100929	4.47	3.81	3.88	3.63	3.22	3.22	3.9	3.69	3.41	3.29	2.29	3.85	5.38	7	4.92	4.11	4.22	3.4	Tyw1	radical S-adenosyl methionine and flavodoxin
100952	2.18	2.41	2.25	1.99	2.17	1.92	2.48	2	3.2	2.92	1.17	2.38	11.5	26.97	7.28	1.56	2.58	1.69	Emilin1	elastin microfibril interfacer 1
100972	52.21	42.24	37.36	52.44	45.63	54.85	40.19	35.76	68.61	62	68.94	78.52	61.15	38.41	52.36	51.04	45.2	57.14	Rab28	RAB28, member RAS oncogene family,RAB28, member RAS oncogene family,
100978	1.46	0.82	0.98	1.02	1.01	1.14	0.86	1.11	1.79	1.87	0.84	1.79	3.38	4.91	2.55	0.83	1.56	0.84	Nfxl1	ovarian zinc finger protein,ovarian zinc finger protein,
100986	8.92	7.07	7.99	7.99	9.22	8.91	7.13	8.64	5.8	6.48	9.68	7.26	6.46	5.72	7.42	9.4	9.72	8.47	Akap9	A kinase (PRKA) anchor protein (yotiao) 9
101023	3.38	4.19	3.75	2.94	2.78	3.36	3.76	2.86	6	6.3	1.97	4.58	8.93	11.29	5.95	2.69	4.22	1.68	Zfp513	zinc finger protein 513
101095	2.4	3.45	3.59	2.61	2.39	3.07	3.73	3.63	2.75	3.88	2.15	2.86	3.98	4.68	3.56	2.15	2.01	1.43	Zfp282	zinc finger protein 282
101100	0.79	0.35	0.47	0.2	0.55	0.37	0.7	0.51	1.9	1.14	3.2	2.58	0.91	0.99	1.26	0.75	0.35	0	Ttll3	tubulin tyrosine ligase-like family, member 3
101113	10.15	11.53	11.65	9.21	8.07	8.11	11.71	12	7.31	8.83	6.53	5.59	10.83	9.96	9.44	12.23	11.85	8.05	Snx21	sorting nexin family member 21,sorting nexin family member 21,
101118	2.38	3.31	2.61	3.52	3.05	2.76	2.28	2.42	6.18	5.19	3.07	6.14	5.92	7.09	5.36	2.15	2.51	2.6	Tmem168	hypothetical protein LOC101118,hypothetical protein LOC101118,
101142	5.14	3.04	4.93	3.65	4.46	4.56	4.6	3.9	3.6	3.43	4.23	3.14	5.08	3.48	3.41	3.5	3.32	4.85	Itfg2	integrin alpha FG-GAP repeat containing 2
101148	4.36	3.81	4.21	3.72	3.79	3.46	2.59	3.65	8.62	7.77	8.75	8.67	5.03	7.25	6.3	2.62	3.63	3.87	B630005N14Rik	hypothetical protein LOC101148
101185	2.83	2.56	2.55	2.69	3.17	1.22	1.59	2.13	0.78	1.2	2.07	1.45	1.92	2.34	2.66	4.28	2.83	1.99	Pot1a	protection of telomeres 1A,protection of telomeres 1A,protection of telomeres 1A,
101187	1.13	0.55	0.73	0.68	0.94	0.63	0.63	0.54	0.73	0.32	0.62	0.88	2.29	1.97	1.03	0.82	0.36	1.25	Parp11	poly (ADP-ribose) polymerase family, member 11,poly (ADP-ribose) polymerase family, member 11,poly (ADP-ribose) polymerase family, member 11,
101197	2.02	1.78	2.37	1.73	2.5	1.79	3.23	2.71	3.4	2.47	1.15	2.31	2.84	2.31	3.02	1.91	2.46	1.82	AI894139	hypothetical protein LOC101197
101202	0.09	0	0.46	0.16	0.16	0.1	0.06	0.31	0.19	0.22	0.12	0.25	0	0	0.07	0	0	0.08	AI987662	hypothetical protein LOC101202
101206	6.37	6.39	5.13	6.27	5.38	5.51	8.39	7.34	12.36	15.62	3.82	11.31	13.3	14.68	10.02	6.65	6.93	5.03	Tada3l	transcriptional adaptor 3-like,transcriptional adaptor 3-like,transcriptional adaptor 3-like,transcriptional adaptor 3-like,
101214	10.66	13.05	12.65	14.69	14.02	13.55	12.83	12.04	34.05	44.26	13.13	40.27	29.79	35.05	24.39	10.63	8.73	11.75	Tra2a	transformer-2 alpha,transformer-2 alpha,transformer-2 alpha,
101240	2.34	1.4	1.69	1.37	1.69	1.77	2.35	1.71	2.14	2.01	1.8	1.94	6.85	11.82	8.59	1.45	1.99	1.55	Wdr91	WD repeat domain 91
101314	20.5	25.82	17.7	30.31	18.66	22.1	26.94	22.67	49.79	42.31	70.67	44.67	47.19	56.12	34.74	21.58	14.12	24.4	6720456B07Rik	hypothetical protein LOC101314
101320	0	0	0	0	0	0	0	0	0	0	0.01	0	0	0	0.03	0.03	0	0	Dyrk4	dual-specificity tyrosine-(Y)-phosphorylation,dual-specificity tyrosine-(Y)-phosphorylation,
101351	2.2	2.76	2.49	2.21	2.22	1.88	2.08	1.61	1.66	3	0.97	2.52	2.79	4.32	3.67	2.46	1.18	2.67	A130022J15Rik	RIKEN cDNA A130022J15
101358	5.1	5.18	5.68	3.74	4.05	3.72	4.84	4.26	4.99	6.13	3.24	4.77	8.2	11.74	6.61	4.84	4.43	2.7	Fbxl14	F-box and leucine-rich repeat protein 14
101437	18.75	17.5	15.26	18.69	18.03	13.37	13.13	15.31	11.79	11.42	10.88	12.77	19.87	20.18	20.62	13.56	12.6	17.15	Dhx32	helicase DDX32,helicase DDX32,helicase DDX32,
101471	4.55	4.05	4.15	3.88	4.11	5.05	5.23	4.81	5.87	8.01	3.85	7.05	8.36	12.98	7.58	3.39	4.79	4.4	AA673488	hypothetical protein LOC101471,hypothetical protein LOC101471,hypothetical protein LOC101471,hypothetical protein LOC101471,
101476	8.88	8.88	11.79	11.1	9.29	10.29	7.42	10.03	8.26	10.21	10.96	9.11	13.79	15.9	11.08	7.91	8.32	11.44	Plekha1	pleckstrin homology domain containing, family A,pleckstrin homology domain containing, family A,
101488	3.75	4.59	3.73	3.26	3.74	2.42	2.83	2.05	1.77	2.55	2.24	1.86	3.65	3.44	2.32	2.22	2.84	1.33	Slco2b1	solute carrier organic anion transporter family,,solute carrier organic anion transporter family,,solute carrier organic anion transporter family,,
101489	6.3	5.98	6	5.98	5.99	5.91	7.29	5.69	6.66	5.6	4.8	6.45	17.05	24.05	13.59	5.98	5.36	4.52	Ric8	synembryn
101490	1.48	1.29	1.75	1.47	1.88	1.41	1.47	1.92	1.01	1.3	1.37	1.26	2.26	3.16	2.08	1.2	1.92	1.53	Inpp5f	inositol polyphosphate-5-phosphatase F,inositol polyphosphate-5-phosphatase F,inositol polyphosphate-5-phosphatase F,inositol polyphosphate-5-phosphatase F,
101497	1.87	3.07	2.74	2.03	2.49	2.3	3.31	2.8	2.25	3	1.33	2.49	4.64	11.71	5.62	1.61	2.04	1.88	Plekhg2	common-site lymphoma/leukemia guanine nucleotide,common-site lymphoma/leukemia guanine nucleotide,common-site lymphoma/leukemia guanine nucleotide,
101502	5.03	5.26	4.43	4.21	3.9	5.13	5.9	3.88	4.8	7.15	3.9	5.55	15.68	24.01	10.99	4.81	4.72	5.06	Hsd3b7	hydroxy-delta-5-steroid dehydrogenase, 3 beta-,hydroxy-delta-5-steroid dehydrogenase, 3 beta-,
101513	24.14	20.28	22.52	23.09	21.88	23.58	26.14	26.53	33.26	31.9	26.1	30.73	31.82	28.4	26.86	24.93	17.94	16.81	2700078K21Rik	ovary-specific MOB-like protein
101533	0.11	0	0	0	0.06	0.06	0.12	0	0	0.08	0.13	0.18	0.15	0.35	0.14	0	0.23	0	Klk9	kallikrein 9 homolog
101540	1.74	2.36	2.53	1.71	2.48	2.48	2.4	3.36	2.57	2.23	1.04	2.14	3.23	4.81	4.55	2	1.68	1.56	Prkd2	protein kinase D2,protein kinase D2,
101543	1.39	1.45	0.74	1.28	1.38	1.07	0.99	0.96	2.48	2.07	0.41	1.56	2.99	4.56	1.86	1.23	1.03	0.71	Wtip	WT1-interacting protein
101544	0.1	0.16	0.07	0	0	0.06	0.1	0.06	0.16	0	0	0.08	0.68	0.5	0.13	0.11	0.05	0	Zfp575	zinc finger protein 575
101565	0.95	0.75	0.99	0.88	0.99	0.82	1.12	1.08	1.22	1.52	0.85	2.08	1.98	3.79	2.96	0.65	0.86	0.73	6330503K22Rik	CP110 protein
101568	6.78	7.62	6.95	7.03	7.58	6.84	8.66	8.18	7.11	6.39	5.48	5.95	16.78	16.22	13.15	8.12	6.28	6.05	Vrk3	vaccinia related kinase 3
101592	2.45	2.45	2.04	2.49	2.13	2.66	2.24	2.19	1.69	1.32	1.56	1.59	3.8	4.68	2.65	2.55	2.4	1.78	Eftud1	elongation factor Tu GTP binding domain,elongation factor Tu GTP binding domain,elongation factor Tu GTP binding domain,
101602	0.92	0.16	0.57	0.47	0.33	0.23	0.42	0.46	0.54	0.88	0.2	0.5	2.2	5.32	0.94	0.17	0.68	0.45	AI467606	hypothetical protein LOC101602
101604	0.53	0.39	0.99	0.89	0.66	0.28	1.05	1.43	0.66	0.68	0.6	0.29	1.09	1.08	0.77	1.14	0.7	0.47	E430018J23Rik	hypothetical protein LOC101604,hypothetical protein LOC101604,
101612	6.16	6.55	6.3	6.16	5.48	7.03	8.5	6.11	10.93	11.37	6.39	10.76	14.95	18.04	11.53	6.32	6.59	5.46	Grwd1	glutamate-rich WD repeat containing 1
101613	0	0	0	0	0	0.01	0.06	0	0.01	0.32	0.02	0.13	0	0.07	0	0	0.06	0	Nlrp6	NLR family, pyrin domain containing 6,NLR family, pyrin domain containing 6,
101631	1.82	0	0.51	0.63	0.98	1.61	0.75	0	1.15	0.53	0.21	0.4	0.98	2.29	0.45	0	0.75	2.73	Pwwp2	PWWP domain containing 2 isoform 2
101685	1.53	1.73	1.28	1.86	1.49	1.53	1.57	1.61	2.5	3.17	1.96	3.52	3.29	6.86	4.12	1.24	1.68	1.69	Spty2d1	SPT2, Suppressor of Ty, domain containing 1
101700	3.67	2.85	2.71	2.59	3.88	4.08	4.07	2.83	2.14	3.16	1.27	2.77	5.29	4.15	2.57	2.42	4	3.32	Trim68	tripartite motif containing 68
101706	14.48	11.83	14.07	10.83	12.31	13.44	11.89	11.71	11.27	14.04	8.13	12.42	15.47	18.91	14.44	9.14	12.91	7.76	Numa1	nuclear mitotic apparatus protein 1,nuclear mitotic apparatus protein 1,nuclear mitotic apparatus protein 1,nuclear mitotic apparatus protein 1,
101739	7.74	5.55	7.28	7.99	7.83	7.43	6.61	9.11	11.41	7.36	12.17	8.71	13.56	17.01	10.6	9.11	7.41	7.56	Psip1	lens epithelium-derived growth factor,lens epithelium-derived growth factor,lens epithelium-derived growth factor,
101744	0	0	0	0	0	0	0	0	0	0	0	0	0	0.08	0	0	0	0	C330005M16Rik	hypothetical protein LOC101744
101772	1.65	1.87	1.79	1.72	1.66	1.05	1.15	1.22	1.16	1.7	1.18	1.81	1.37	1.44	1.53	1.34	1.23	1.53	Tmem16a	transmembrane protein 16A,transmembrane protein 16A,
101809	0.53	0.49	0.69	0.14	0.22	0.1	0.32	0.21	0.85	2.07	0.53	1.59	1.3	2.8	2.04	0.69	0.32	0.12	Spred3	sprouty-related, EVH1 domain containing 3
101831	0.37	0.1	0.35	0.25	0.13	0.34	0.38	0.14	1.84	0.99	0.99	1.19	1.59	4.13	1	0.48	0.26	0.47	C230052I12Rik	hypothetical protein LOC101831
101835	3.61	4.81	5.21	5.87	7.64	3.18	3.02	3.47	4.76	5.33	5	7.24	7.82	3.7	4.7	3.32	5	4.26	AW146154	hypothetical protein LOC101835
101861	5.83	7.72	6.72	8.02	7.53	7.01	6.22	8.77	3.77	3.56	5.54	4.26	8.47	12.55	7.81	6.57	6.95	7.82	Ints4	integrator complex subunit 4,integrator complex subunit 4,
101867	3.37	4.54	3.54	4.56	3.83	3.17	4.79	3.71	4.65	4.32	4.17	4.79	6.22	11.09	7.3	6.32	5.21	3.99	1500003O22Rik	hypothetical protein LOC101867
101869	4.57	4.68	4.2	3.45	2.93	3.85	4.66	4.01	6.22	6.81	2.2	6.18	6.68	10.6	7.63	3.7	3.75	3.07	Unc45a	smooth muscle cell associated protein-1
101883	2.77	2.91	2.99	2.52	2.44	2.62	4.15	3.64	6.65	6.01	1.7	4.82	5.21	4.87	4.74	1.9	2.66	1.69	Tmem149	hypothetical protein LOC101883,hypothetical protein LOC101883,
101943	5.16	4.65	7.49	5.85	7.47	5.26	4.89	5.31	7.13	7.47	5.13	7.86	13.78	27.51	10.2	4.79	5.2	3.86	Sf3b3	splicing factor 3b, subunit 3,splicing factor 3b, subunit 3,
101966	76.61	88.55	76.27	88.89	80.72	79.63	87.22	89.43	111.97	91.33	112.91	75.8	136.41	112.13	112.22	87.77	59.39	73.08	D8Ertd738e	hypothetical protein LOC101966
101985	3.05	2.75	2.6	4.09	3.22	1.88	2.36	2.78	5.12	6.44	1.73	3.94	4.74	12.89	8.34	2.4	2.95	2.2	AA960436	hypothetical protein LOC101985
101994	2.72	3.09	3.1	3.11	3.12	2.62	3.34	3.19	3.49	3.77	4.06	3.75	4.15	6.91	4.78	2.88	2.92	2.75	D8Ertd457e	hypothetical protein LOC101994,hypothetical protein LOC101994,
102022	0	0	0	0	0	0	0	0	0.03	0	0	0	0	0	0	0.09	0	0	Ces6	carboxylesterase 6
102032	25.93	25.2	23.87	27.88	23.21	28.35	22.94	33.15	25.6	17.77	57.9	16.78	29.07	16.2	22.92	31.71	15.69	30.39	AI316807	hypothetical protein LOC102032,hypothetical protein LOC102032,
102058	1.87	1.72	2.13	1.29	1.51	2.7	2.67	2.18	1.71	2.6	1.21	2.06	3.59	4.96	3.25	1.95	2.34	1.65	Exoc8	exocyst complex component 8
102060	12.63	25.75	22.01	24.12	16.86	11.72	29.83	16.78	42.58	29.42	13.15	23.15	51.31	31.95	29.35	18.03	24.25	22.92	Gadd45gip1	growth arrest and DNA-damage-inducible, gamma
102075	0.02	0.05	0.03	0.01	0.01	0.05	0.02	0.01	0.01	0.07	0.01	0.07	0.08	0.32	0.12	0	0.05	0.09	Plekhg4	pleckstrin homology domain containing, family G
102093	96.47	90.64	95.8	100.71	112.52	113.6	92.92	99.68	63.13	77.26	78.16	89.08	64.99	21.07	73.9	123.1	97.03	122.43	Phkb	phosphorylase kinase beta
102098	2.78	2.63	3.2	2.07	2.83	2.37	2.4	2.49	1.52	1.93	0.74	1.8	3.68	4.49	2.36	1.83	2.91	2.05	Arhgef18	rho/rac guanine nucleotide exchange factor (GEF)
102103	27.77	27.5	29.16	32.39	33.06	45.54	35.77	45.8	15.37	18	22.34	21.16	21.86	15.56	24.83	44.37	44.91	38.39	Mtus1	mitochondrial tumor suppressor 1 isoform 1,mitochondrial tumor suppressor 1 isoform 1,
102115	25.98	24.46	24.36	17.18	17.24	23.86	23.19	18.64	33.7	46.94	11.68	32.09	33.54	38.65	37.52	18.85	22.3	15.45	Dohh	deoxyhypusine hydroxylase/monooxygenase,deoxyhypusine hydroxylase/monooxygenase,
102122	15.17	11.82	13.68	15.58	14.08	11.22	11.56	11.45	14.24	12.21	12.69	13.49	19.49	16.37	14.78	14.23	12.6	12.11	2310065K24Rik	hypothetical protein LOC102122,hypothetical protein LOC102122,
102124	0.78	0.39	0.51	0.33	0.64	0.68	0.64	0.46	0.69	0.71	0.68	0.54	2.88	5.41	1.23	0.27	0.21	0.93	E130303B06Rik	hypothetical protein LOC102124
102141	2.66	1.74	2.94	2.39	2.92	2.7	2.36	2.29	2.11	1.83	3.14	1.97	3.45	4.45	2.64	2.22	1.97	2.04	Snx25	sorting nexin 25
102162	5.59	4.4	4.6	4.95	4.39	3.73	5.24	4.92	7.77	8.11	5.9	8.98	8.59	11.86	8.27	3.69	4.62	3.19	Taf5l	TAF5-like RNA polymerase II, p300/CBP-associated,TAF5-like RNA polymerase II, p300/CBP-associated,
102182	3.75	2.37	2.94	3.58	4.29	3.81	3.25	3.48	4.1	4.24	2.42	5.47	5.81	5.34	3.35	3.09	3.61	5.31	AI931714	hypothetical protein LOC102182
102193	11.19	11.15	11.98	10.36	10.82	10.15	12.74	12.08	11.36	13.61	11.64	13.55	13.67	18.13	12.21	12.33	12.29	13.72	Zdhhc7	zinc finger, DHHC domain containing 7
102209	5.86	6.29	6.38	4.55	5.43	5.04	6.94	5.77	9.27	9.95	3.79	8.19	9.03	13.78	11.71	5.04	5.39	3.12	Snapc2	small nuclear RNA activating complex,
102247	17.39	18.65	17.02	18.08	17.33	13.47	14.8	15.38	12.52	12.9	16.75	12.07	22.8	26.9	18.1	17.3	19.16	15.47	Agpat6	lysophosphatidic acid acyltransferase zeta,lysophosphatidic acid acyltransferase zeta,
102278	0.06	0.04	0.04	0.05	0.03	0.19	0.03	0.06	0.21	0.33	0.08	0.11	0.19	0.43	0.21	0.22	0.03	0.07	Cpne7	copine 7 protein
102294	0.69	0.94	0.84	1.08	0.81	0.52	0.88	0.83	0.64	0.71	0.75	1.02	2.07	2.89	1.6	0.61	0.51	0.76	Cyp4v3	family 4 cytochrome P450
102323	26.95	30.35	23.28	33.05	21.5	19.77	26.06	26.46	10.97	11.38	8.05	14.09	17.26	8.55	16.48	23.66	23.99	27.25	Dcun1d2	DCN1, defective in cullin neddylation 1, domain,DCN1, defective in cullin neddylation 1, domain,
102334	8.39	6.42	7.36	6.9	7.89	7.04	7.93	7.54	12.53	14.1	5.49	10.79	31.82	65.61	28.05	7.05	7	6.67	Ankrd10	ankyrin repeat domain 10,ankyrin repeat domain 10,ankyrin repeat domain 10,
102339	22.7	19.22	18.58	20.44	19.31	23.35	20.7	16.38	33.57	31.26	21.65	33.49	29.92	21.86	23.83	21.06	19.86	21.11	Cog4	component of oligomeric golgi complex 4,component of oligomeric golgi complex 4,
102371	1.8	1.46	1.92	1.33	1.57	2.87	1.65	2.7	2.08	2.7	1.97	2.18	2.71	3.92	2.38	2.6	2.17	2.04	AA407270	hypothetical protein LOC102371
102414	14.68	13.39	14.37	12.83	14.21	12.3	11.88	12.97	14.28	14.19	14.68	13.6	17.4	18.05	15.85	16.28	14.58	13.17	Clk3	CDC-like kinase 3,CDC-like kinase 3,
102423	1.56	1.93	1.82	1.42	1.82	1.21	1.38	1.63	2.71	3.17	1.62	3.35	2.73	4.52	4.28	1.09	1.57	2.23	Mizf	MBD2-interacting zinc finger,MBD2-interacting zinc finger,
102436	7.16	7.58	7.78	7.17	8.6	7.76	9.31	7.72	8.45	12.21	6.12	12	10.07	7.91	8.93	5.92	7.33	6.69	Lars2	leucyl-tRNA synthetase, mitochondrial
102448	0.03	0.05	0	0.06	0.04	0	0.03	0.19	0.07	0.57	0.04	0.18	0.62	0.59	0.29	0.11	0.14	0	Xylb	xylulokinase homolog (H. influenzae),xylulokinase homolog (H. influenzae),
102462	12.66	12.22	14.78	13.51	10.99	8.63	16.87	12.75	12.21	9.75	3.26	6.33	11.46	21	14.55	19.72	15.19	16.23	Imp3	IMP3, U3 small nucleolar ribonucleoprotein,
102502	0.02	0.04	0	0.04	0.01	0	0	0	0.03	0.04	0.03	0	0	0	0.06	0	0.03	0.12	AI427122	hypothetical protein LOC102502
102545	2.15	1.46	1.95	2.77	1.92	1.24	3.28	4.65	1.18	1.08	1.97	1.18	6.06	17.28	3.97	2.38	1.63	6.32	Cmtm7	CKLF-like MARVEL transmembrane domain containing,CKLF-like MARVEL transmembrane domain containing,
102566	10.65	11.07	11.07	12.42	12.29	10.02	13.32	12	11.35	9.32	6.87	11.49	16.08	12.82	13.17	11.1	11.55	13.82	Tmem16k	hypothetical protein LOC102566,hypothetical protein LOC102566,hypothetical protein LOC102566,
102570	0	0	0	0.09	0.07	0.03	0	0	0.05	0.07	0.03	0.11	0.14	0.34	0	0.11	0.05	0	Slc22a13	solute carrier family 22 (organic cation
102580	2.55	2.07	2.19	2.45	2.22	2.24	1.39	2.48	0.97	0.87	0.82	0.9	2.83	7	2.24	2.63	2.98	2.31	Alg9	disrupted in bipolar disorder 1 homolog
102595	2.12	3.62	3.25	3.03	2.4	2.25	2.5	2.31	2.25	2.19	1.82	2.1	9.64	26.33	8.88	2.06	2.74	2.08	Plekhq1	PH domain-containing protein homolog,PH domain-containing protein homolog,PH domain-containing protein homolog,
102607	7.96	7.74	9.36	8.45	8.3	8.46	9.53	7.75	7.57	8.17	8.35	7.57	10.87	9.44	9.77	7.67	8.89	6.63	Snx19	sorting nexin 19
102614	0	0.18	0	0	0	0	0	0	0.24	0.08	0.13	0.09	0.31	0	0	0	0	0	Rpp25	ribonuclease P 25kDa subunit
102626	13.39	12.35	12.42	12.91	13.06	10.75	14.75	13.89	10.85	11.48	7.29	10.03	13	14.53	19.75	12.42	17.16	12.32	Mapkapk3	mitogen-activated protein kinase-activated,mitogen-activated protein kinase-activated,mitogen-activated protein kinase-activated,mitogen-activated protein kinase-activated,
102632	22.07	22.13	22.76	23.17	23.97	23.48	20.71	23.15	14.37	15.97	10.05	17.3	17.07	8.08	15.8	17.88	20.79	16.24	Acad11	acyl-Coenzyme A dehydrogenase family, member 11
102644	3.05	4.7	4.75	4.13	4.97	2.4	4.74	3.79	6.04	4.68	4.33	4.61	7.29	18.17	5.04	3.37	3.18	2.72	Oaf	out at first
102657	0.87	1.5	2.47	1.45	1.76	0.81	0.8	0.82	0.72	0.79	1.43	0.82	2.34	2.86	1.3	2.02	1.41	1.03	Cd276	CD276 antigen,CD276 antigen,
102680	0	0	0	0.03	0.01	0	0	0	0.1	0.17	0.03	0.37	0.03	0.12	0.03	0.03	0.02	0	Xtrp3s1	X transporter protein 3 similar 1
102693	8.5	7	9.06	6.14	6.71	10.89	9.67	10.49	7.43	8.66	4.9	7.6	13.14	17.8	12.69	7.58	11.22	6.74	Phldb1	pleckstrin homology-like domain, family B,,pleckstrin homology-like domain, family B,,pleckstrin homology-like domain, family B,,pleckstrin homology-like domain, family B,,
102747	1.23	1.21	1.62	1.19	1.22	1.12	1.11	0.84	0.83	0.83	0.8	1.3	2.49	4.67	1.95	0.85	1.04	1.18	Lrrc49	leucine rich repeat containing 49,leucine rich repeat containing 49,leucine rich repeat containing 49,
102774	1.97	2.27	1.61	2.46	1.96	2.04	2.54	2.93	1.94	2.43	1.52	1.96	4.27	2.4	4.36	2.75	1.86	2.59	Bbs4	Bardet-Biedl syndrome 4 homolog
102791	7.94	12.04	6.2	8.14	8.42	9.87	9.73	8.26	21.96	24.23	16.37	18.42	24.25	9.66	20.57	12.77	10.44	4.81	Tcta	T-cell leukemia translocation altered
102857	34.96	37.58	41.62	34.62	40.04	22.6	33.09	31.45	23.39	28.35	25.36	25.29	37.13	39.06	36.75	22.23	25.23	24.47	Slc6a8	solute carrier family 6 (neurotransmitter,solute carrier family 6 (neurotransmitter,solute carrier family 6 (neurotransmitter,
102866	5.58	7.23	6.68	7.25	7.12	7.75	7.48	8.56	15.74	16.07	13.07	17.98	20.66	24.56	15.63	5.17	5.68	7.7	Pls3	plastin 3 precursor,plastin 3 precursor,plastin 3 precursor,
102871	0.03	0.15	0.07	0.06	0.04	0	0.07	0.04	0	0.09	0.04	0	0.11	0.18	0.08	0.07	0.02	0.04	D330045A20Rik	hypothetical protein LOC102871,hypothetical protein LOC102871,
102920	0.04	0	0.06	0.03	0.02	0	0.02	0.07	0	0.03	0.02	0.07	0.86	2.03	0.53	0	0.02	0	Cenpi	centromere protein I,centromere protein I,centromere protein I,centromere protein I,
102941	0	0.05	0	0.08	0	0.07	0	0.15	0.04	0	0.02	0.11	0.14	0.17	0.08	0.04	0.04	0	B630019K06Rik	hypothetical protein LOC102941
102954	0.93	1.12	2.48	0.9	1.26	1.5	1.31	0.32	1.13	1.24	0.28	0.62	1.44	1.42	0.88	0.63	0.51	0.54	Nudt10	nudix-type motif 10
103080	2.73	3.28	3.14	2.85	3.5	2.76	2.54	2.89	3.17	1.61	4.32	2.81	10.65	9.64	5.37	2.54	2.95	2.32	2014-09-10	septin 10 isoform 2
103098	0.14	0.03	0.03	0.12	0.12	0.12	0	0.06	0.15	0.1	0	0.19	0.17	0.04	0.11	0.02	0.26	0.11	Slc6a15	solute carrier family 6, member 15,solute carrier family 6, member 15,
103135	2.56	2.61	2.76	2.32	2.47	2.24	2.63	2.5	2.27	2.88	1.7	2.82	2.96	5.11	3.59	1.71	2.71	2.49	Usp52	ubiquitin specific peptidase 52,ubiquitin specific peptidase 52,ubiquitin specific peptidase 52,
103136	8.11	8.83	8.8	8.85	10.56	9.26	8.37	8.25	11.33	10.38	6.74	11.84	16.39	16.92	12.91	9.01	8.98	9.06	Pwp1	periodic tryptophan protein 1 homolog,periodic tryptophan protein 1 homolog,
103140	1.84	1.58	1.07	1.41	1.66	0.66	1.84	0.8	2.44	2.23	0.88	1.94	2	3.13	1.7	1.71	1.83	1.49	Gstt3	glutathione S-transferase, theta 3
103142	0.6	0.44	0.45	0.46	0.41	1.29	0.49	0.59	2.04	1.57	1.1	2.07	1.47	0.15	0.8	0.04	0.37	0.6	Rdh9	retinol dehydrogenase 9,retinol dehydrogenase 9,
103149	0.16	0.12	0.06	0.09	0.06	0.13	0.12	0.09	0.21	0.11	0.07	0.09	0.21	0.2	0	0.09	0	0.05	Upb1	ureidopropionase, beta
103172	280.1	410.54	269.81	318.66	221.16	259.19	494.85	474.46	397.94	306.8	87.65	241.04	195.24	182.94	381.63	493.17	280.24	383.83	Ndg2	Nur77 downstream gene 2,Nur77 downstream gene 2,
103199	3.45	3.02	3.36	3.11	3.76	2.98	3	3.34	3.67	4.64	2.77	5.02	6.37	8.02	5.37	3.27	2.94	3.61	Fig4	Sac domain-containing inositol phosphatase 3
103213	1.86	1.44	1.41	1.8	1.62	1.49	1.7	2.33	1.47	1.71	1.33	1.84	2.29	3.95	2.34	2.19	1.82	1.53	Traf3ip2	Traf3 interacting protein 2
103220	0.82	0.51	0.9	0.76	0.9	0.83	0.29	0.44	0.94	0.88	0.55	1.16	0.87	0.67	0.53	0.56	0.63	0.22	BC030307	Grp94 neighboring nucleotidase isoform 2
103236	40.14	45.87	39.48	40.02	35.58	41.32	52.37	45.06	48.38	52.75	21.26	38.86	50.72	61.78	48.9	42.48	47.46	44.37	Csnk1g2	casein kinase 1, gamma 2,casein kinase 1, gamma 2,
103266	3.65	4.42	4.25	4.43	5.06	4.3	3.03	3.71	3.35	4.94	2.75	5.06	14.93	12.53	11.41	4.3	4.47	1.77	AI597468	hypothetical protein LOC103266
103268	0.66	1.33	1.02	0.75	1.07	1.06	0.8	0.83	0.7	0.8	0.84	1.15	1.34	1.8	1.33	1.26	0.68	1.2	2410017P07Rik	hypothetical protein LOC103268,hypothetical protein LOC103268,hypothetical protein LOC103268,
103284	2.57	3.3	2.36	2.7	2.46	2.98	3.07	2.93	2.55	3.13	3	2.22	3.47	6.3	2.83	2.73	3.25	2.06	Zc3h10	zinc finger CCCH type containing 10
103406	0.43	0.59	0.41	0.49	0.34	0.64	0.9	0.67	0.81	0.55	0.49	0.25	1.04	0.39	0.59	0.51	0.64	0.56	9130206N08Rik	hypothetical protein LOC103406
103425	13.73	13.22	13.58	12.18	12.13	14.33	17.04	15.51	17.37	23.49	6.17	18.05	24.84	39.16	17.98	10.49	14.8	12.07	Ncln	nicalin homolog
103466	15.71	14.38	13.74	14.98	14.91	14.15	19.69	20.64	8.81	10.21	19.11	12.17	12.85	10.44	14.91	26.57	14.96	18.8	Nt5dc3	5'-nucleotidase domain containing 3,5'-nucleotidase domain containing 3,
103468	2.29	2.55	2.71	2.37	2.1	2.63	2.19	1.4	2.64	2.44	1.35	2.52	4.52	7.93	3.7	2.54	2.23	1.79	Nup107	nucleoporin 107
103511	0.84	1.07	1	1.03	1.08	0.93	1.13	1.79	0.96	1.43	1.24	1.13	1.18	2.13	0.99	0.46	1.41	0.67	BB146404	hypothetical protein LOC103511
103534	18.18	18.95	19.14	15.66	18	15.27	18.07	23.32	18.34	17.1	17.35	16.52	28.06	30.27	32.47	20.98	18.66	21.52	Mgat4b	mannoside acetylglucosaminyltransferase 4,
103537	1.67	1.53	1.63	1.62	1.92	1.53	0.99	0.89	2.42	2.66	2.19	3.55	2.35	3.72	3.01	1.72	1.59	1.5	Mbtd1	mbt domain containing 1
103551	0.27	0.14	0.51	0.17	0.16	0.07	0.59	1.05	0.23	0.09	0.02	0.05	0.29	1.14	0.38	0.24	0.38	0.27	E130012A19Rik	hypothetical protein LOC103551
103554	31.04	40.12	44.65	46.34	50.19	35.08	29.34	43.42	12.61	15.59	35.87	17	21.04	20.33	24.45	54.98	40.46	54.16	Psme4	proteasome (prosome, macropain) activator
103573	7.84	8.26	8.05	9.61	10.58	7.69	7.17	7.96	10.56	6.92	13.12	11.39	22.88	26.45	17.44	10.11	9.55	11.63	Xpo1	exportin 1, CRM1 homolog
103583	13.64	12.1	13.38	14.13	13.84	11.06	11.9	11.23	8.26	8.2	7.17	10.11	13.89	16.71	15.07	14.73	13.13	15.94	Fbxw11	F-box and WD-40 domain protein 11,F-box and WD-40 domain protein 11,F-box and WD-40 domain protein 11,F-box and WD-40 domain protein 11,
103655	0	0	0	0	0	0	0	0	0	0	0.05	0.02	0	0.21	0.05	0	0.04	0	Sec14l4	SEC14 (S. cerevisiae)-like 2
103677	4.35	4.29	4.73	4.15	4.27	4.79	3.94	4.22	6.96	7.35	7.38	6.77	6.23	6.29	5.45	3.98	5.12	3.51	Smg6	telomerase subunit EST1A
103694	27.8	33.03	24.56	27.34	24.89	20.41	30.96	25.53	23.59	19.64	21.3	20.27	22.64	22.03	19.78	22.43	28.73	29.87	Tmed4	transmembrane emp24 protein transport domain
103710	8.86	9.96	12.63	7.91	8.52	13.51	12.5	13.08	5.51	6.17	3.22	4.97	18.06	24.25	17.28	13.05	10.84	5.88	Slc35e4	solute carrier family 35, member E4
103711	3.94	5.97	4.54	4.22	3.82	4.08	6.45	7.6	3.19	3.42	2.13	3.15	7.1	7.24	10.66	5.42	5.03	6.89	Pnpo	pyridoxine 5'-phosphate oxidase
103712	0.2	0	0	0.11	0.16	0	0.41	0.33	0.21	0.14	0	0.21	0.27	0	0.12	0	0.3	0	6330403K07Rik	hypothetical protein LOC103712
103724	1.99	1.29	2.14	1.63	1.95	2.62	2.58	2.14	2.93	2.79	0.63	2.22	4.42	8.69	3.94	2.2	1.75	1.83	Tbc1d10a	TBC1 domain family, member 10a
103733	14.37	20.16	15.64	17.37	14.21	12.34	17.02	14.85	17.27	17.56	13.35	16.92	20.83	30.12	17.07	14.55	18.21	11.61	Tubg1	tubulin, gamma 1
103737	3.26	4.26	3.31	3.85	4.11	3.01	2.72	3.72	6.87	7.97	5.22	10.33	5.98	4.89	6.4	4.01	3.17	4.96	Pex12	peroxisomal biogenesis factor 12,peroxisomal biogenesis factor 12,peroxisomal biogenesis factor 12,peroxisomal biogenesis factor 12,
103742	11.5	15.28	9.84	14.65	13.08	17.4	15.89	12.19	31.19	24.83	26.96	25.04	35.88	57.41	22.95	12.2	10.67	20.88	1810046J19Rik	hypothetical protein LOC103742
103743	1.18	0.76	1.83	0.84	1.08	0.77	1.22	0.94	1.46	1.61	0.35	1.32	2.43	5.22	2.25	0.69	0.64	0.17	Tmem98	hypothetical protein LOC103743
103765	1.15	2.13	1.49	2.16	2.12	1.11	1.55	2.34	1.36	0.52	0.57	0.7	1.55	1.17	2.41	2.06	1.32	1.61	Tmem17	transmembrane protein 17
103768	3.74	3.69	4.31	4.21	3.63	2.91	3.69	3.16	4.09	4.54	2.84	3.96	5.37	8.43	3.07	2.8	4.74	3.08	Tubg2	tubulin, gamma 2,tubulin, gamma 2,
103775	0.09	0	0	0.16	0.07	0	0.05	0.21	0	0	0.03	0.05	0	0	0.29	0.1	0	0	Slc25a41	solute carrier family 25, member 41,solute carrier family 25, member 41,
103784	2.39	3.1	3.66	2.63	3.31	4.1	2.21	2.23	7.04	6.15	5.77	8.37	4.84	3.16	3.49	3.79	4.62	4.75	Wdr92	WD repeat domain 92
103806	1.25	1.05	1.64	1.15	1.05	1.3	1.68	1.57	2.52	1.9	0.59	2.15	2.2	5.09	3.11	0.97	1.29	0.85	Maml1	mastermind like 1
103836	4.29	3.76	3.15	3.4	3.65	2.33	4.47	3.73	5.06	5.54	2.92	5.96	6.98	9.8	7.71	3.22	3.68	2.94	Zfp692	zinc finger protein 692,zinc finger protein 692,
103841	56.67	66.11	57.68	52.87	48.09	59.82	67.14	63.22	15.63	19.07	24.03	14.7	25.45	9.55	23.03	58.14	76.79	49.88	Cuedc1	CUE domain containing 1,CUE domain containing 1,
103844	1.28	2.32	1.4	1.65	1.78	1.12	1.67	2.29	1.28	0.88	1.53	0.77	1.27	1.19	1.43	2.76	2.01	3.46	AI842396	inhibitor of CDK interacting with cyclin A1,inhibitor of CDK interacting with cyclin A1,inhibitor of CDK interacting with cyclin A1,
103850	6.17	7.98	6.99	6.07	6.03	6.6	7.47	5.22	9.19	8.06	3.25	7.54	8.32	4.13	9.36	6.83	5.99	6.55	Nt5m	5',3'-nucleotidase, mitochondrial,5',3'-nucleotidase, mitochondrial,
103889	0.56	0.21	0.05	0.15	0.19	0.26	0.37	0.48	0.1	0.19	0.26	0.14	0.58	0.9	0.61	0.44	0.1	0.74	Hoxb2	homeo box B2
103963	19.34	17.66	15.57	17.81	17.67	18.94	17.95	18.09	24.77	25.31	19.22	25.41	47.09	93.78	42.82	27.75	21.67	24.89	Rpn1	ribophorin I
103967	1.27	1.25	1.14	1.07	1.56	0.98	0.9	1.18	0.72	0.73	0.57	0.71	1.29	2.19	1.06	0.62	1.07	0.81	Dnm3	dynamin 3,dynamin 3,
103968	9.67	5.99	5.07	5.79	3.51	7.36	6.63	5.98	6.96	5.76	1.86	4.62	5.72	7.9	2.84	2.9	6.83	3.15	Plin	perilipin,perilipin,perilipin,
103978	0.02	0	0	0	0	0	0	0	0	0	0	0	0	0	0	0	0	0	Gpc5	glypican 5
103988	1.16	0.73	0.87	0.98	1.04	6.29	2.9	5.49	1.45	3.03	5.46	3.35	5.18	0.67	1.17	4.88	2.95	6.18	Gck	glucokinase,glucokinase,glucokinase,
104001	1.1	1.15	0.38	1.4	0.65	0.81	0.57	0.73	1.16	0.13	0.58	0.4	0.99	2.32	1.27	0.71	1.23	0	Rtn1	reticulon 1 isoform RTN1-A
104009	3.39	6.62	6.29	4.66	4.55	6.7	5.44	7.81	5.03	4.42	2.59	4.84	22.85	29.42	14.49	4.78	5.2	4.8	Qsox1	quiescin Q6 sulfhydryl oxidase 1 isoform b
104010	0.11	0.35	0.11	0.14	0.1	0.25	0.08	0.2	0.2	0.09	0.39	0.11	0.17	0.5	0.18	0.19	0.2	0.02	Cdh22	cadherin 22
104069	0.14	0	0	0	0	0	0	0	0	0	0	0	0	0	0	0	0	0	Sncb	synuclein, beta
104079	0	0	0	0.11	0.05	0.05	0	0.21	0	0	0	0.03	0	0.35	0	0	0.2	0.42	Nxph3	neurexophilin 3
104080	0.12	0.12	0.05	0.16	0.14	0.09	0.04	0.13	0.16	0.34	0.15	0.13	0	0.1	0.05	0.09	0.08	0.19	Nxph4	neurexophilin 4
104086	17.66	14.18	16.99	15.03	16.35	27.73	30.64	32.66	20.57	19.29	16.14	20.22	13.24	5.54	17.22	34.13	19.49	25.89	Cyp27a1	cytochrome P450, family 27, subfamily a,
104099	1.66	2.6	1.39	2.25	1.67	1.45	2.2	1.31	1.63	1.28	1.01	2.05	4.47	4.42	2.46	1.24	1.7	1.54	Itga9	integrin alpha 9,integrin alpha 9,
104110	3.73	2.56	2.23	2.21	1.97	3.94	3.23	2.88	2.37	3.65	2.03	2.66	5.33	13.99	7.14	1.63	2.55	2.57	Adcy4	adenylate cyclase 4,adenylate cyclase 4,
104111	0.79	0.68	0.65	0.64	0.69	0.55	0.58	0.63	0.83	0.77	0.4	0.58	1.71	3.31	1.07	0.3	0.53	0.31	Adcy3	adenylate cyclase 3,adenylate cyclase 3,adenylate cyclase 3,
104112	4.64	4.64	4.45	4.02	4.55	4.41	5.77	5.46	10.79	9.9	3.63	9.59	11.9	28.17	10.23	2.61	4.76	3.23	Acly	ATP citrate lyase,ATP citrate lyase,
104130	205.49	349.85	256.19	308.82	238.46	217.28	358.33	308.83	337.05	321.23	157.62	288.7	261.19	230.11	304.4	251.8	198.75	279.74	Ndufb11	neuronal protein 15.6
104156	2.74	3.82	2.7	3.48	2.69	2.37	4.46	3.02	2.26	2.38	3.73	2.63	5.08	8.13	5.1	2.7	2.21	2.25	Etv5	ets variant gene 5,ets variant gene 5,
104158	27.17	22.74	18.25	23.1	19.8	34.43	31.06	24.37	10.37	10.67	2.71	12.02	8.26	2.42	3.96	5.4	22.46	14.76	Ces3	carboxylesterase 3
104174	0	0	0.04	0	0.04	0.05	0.08	0.08	0.02	0	0	0.02	0.32	1.42	0.17	0.07	0	0	Gldc	glycine decarboxylase,glycine decarboxylase,
104175	5.9	5.67	6.96	4.72	4.72	4.47	8.25	5.26	4.99	6.39	0.86	4.95	6.42	14.16	6.27	4.2	6.38	4.03	Sbk1	SH3-binding kinase 1
104183	0	0	0	0	0	0	0	0	0	0	0.02	0	2.73	18.92	0.1	0	0	0	Chi3l4	chitinase 3-like 4
104184	10.74	10.36	10.69	12.39	12.59	13.73	11.08	12.58	8.18	7.91	7.49	9.01	23.08	20.74	12.38	11.43	9.36	13.39	Blmh	bleomycin hydrolase
104215	25.29	39.91	47	44.63	42.18	27.45	43.48	36.56	16.13	24.49	31.5	23.85	21.93	20.15	25.99	28.06	34.76	53.47	Rhoq	ras homolog gene family, member Q
104248	2.04	1.57	2.33	1.85	2.11	2.26	2.51	2.76	1.55	1.43	1	1.89	3.79	7.23	3.78	1.39	2.39	1.27	Cabin1	calcineurin binding protein 1,calcineurin binding protein 1,
104252	10.1	9.07	9.84	9.17	8.48	7.42	9.93	9.48	6.45	6.13	6.08	5.98	12.96	13.42	11.53	9.68	8.98	7.05	Cdc42ep2	CDC42 effector protein (Rho GTPase binding) 2,CDC42 effector protein (Rho GTPase binding) 2,
104263	2.71	2.58	2.33	2.89	2.45	2.29	2.14	3.08	4.76	4.08	3.65	4.68	4.78	6.57	5.11	2.83	2.57	2.37	Jmjd1a	jumonji domain containing 1A isoform 1,jumonji domain containing 1A isoform 1,jumonji domain containing 1A isoform 1,
104271	0.02	0.03	0.03	0.03	0.02	0.01	0	0	0	0.01	0.01	0.01	0.01	0.07	0.03	0.02	0	0.02	Tex15	testis expressed gene 15
104303	56.42	65.62	64.21	68.74	65.83	66.34	49.44	55.38	64.09	65.63	99.87	69.84	83.68	96.52	73.81	60.85	56.18	57.33	Arl1	ADP-ribosylation factor-like 1
104318	17.61	20.23	20.77	20.47	20.19	22.66	19.74	19.42	20.06	18.39	27.57	19.21	28.65	36.91	28.29	21.26	20.35	18.1	Csnk1d	casein kinase 1, delta isoform 1,casein kinase 1, delta isoform 1,
104346	3.26	2.65	2.64	2.22	1.98	3.54	2.08	2.18	2.26	2.62	2.56	2.27	5.87	8.56	3.31	1.5	1.71	2.61	Gas8	growth arrest specific 8,growth arrest specific 8,
104348	1.99	3.11	3.1	1.45	5.23	1.37	4.37	3.09	7.84	6.46	4.8	8.43	8.03	10.01	19.25	4.12	3.06	10.55	Zfp120	zinc finger protein 120 isoform 2
104349	2.78	2.95	1.96	2.77	2.83	1.61	2.36	1.77	3.29	2.97	2.79	3.74	3.87	1.65	2.04	2.49	2.17	3.67	Zfp119	zinc finger protein 119
104360	0	0	0	0	0	0	0	0.04	0	0	0	0.04	0	0	0	0	0	0	Isl2	insulin related protein 2 (islet 2)
104362	0	0	0	0	0	0	0	0	0	0	0	0	0.22	0	0	0	0	0	Meig1	meiosis expressed gene 1,meiosis expressed gene 1,
104383	1.68	1.7	4.14	1.28	3.61	0.52	1.12	1.51	0.62	0.81	0.55	0.93	1.88	2.06	2.28	0.82	1.59	1.51	Rcor2	REST corepressor 2,REST corepressor 2,REST corepressor 2,
104394	15.02	21.42	16.37	18.8	16.5	12.79	15.2	19.72	19.5	22.64	15.76	20.93	27.81	49.8	26.64	17.11	17.17	16.57	E2f4	E2F transcription factor 4
104401	2.76	2.77	2.99	2.65	2.81	2.65	3.2	2.96	3.33	4.79	1.78	3.48	5.92	11.63	5.98	2.33	3.19	2.26	Pcnxl3	pecanex-like 3,pecanex-like 3,pecanex-like 3,pecanex-like 3,pecanex-like 3,
104416	16.12	15.24	17.93	14.85	17.18	12.9	12.55	14.38	19.64	21.03	14.51	21.42	14.52	18.88	14.86	17.29	16.44	15.37	Bap1	Brca1 associated protein 1
104418	26.3	22.61	23.75	20.76	21	18.47	19.71	19.28	14.68	13.61	7.58	12.69	21.45	25.85	23.31	17.43	20.32	16.91	Dgkz	diacylglycerol kinase zeta,diacylglycerol kinase zeta,diacylglycerol kinase zeta,
104444	35.2	35.41	31.21	39.92	33.64	35.04	37.61	39.17	47.9	42.63	52.75	43.96	73.63	61.09	44.22	32.06	31.18	37.22	Rexo2	small fragment nuclease
104445	3.5	4.37	3.88	3.73	2.37	3.15	5.25	4.36	3.96	4	1.69	3.71	3.85	8.96	5.26	1.94	3.1	2.26	Cdc42ep1	CDC42 effector protein (Rho GTPase binding) 1
104457	12.15	13.22	10.92	13.02	11.15	10.62	14.68	14.88	13.17	13.89	11.78	12.25	17.01	24.69	12.54	15.49	10.1	10.14	0610010K14Rik	hypothetical protein LOC104457,hypothetical protein LOC104457,
104458	16.96	17.72	15.34	18.52	18.34	16.48	17.95	20.14	20.21	19.04	18.78	20.21	32.98	34.61	24.62	17.12	15.17	19.65	Rars	arginyl-tRNA synthetase
104479	9.1	9.64	9.31	11.18	7.84	9.23	9.4	11.57	33.1	32.85	14.02	31.22	19.57	23.44	21.17	6.82	11.38	5.84	Ccdc117	coiled-coil domain containing 117
104570	4.73	4.9	4.63	6.14	5.97	4.32	4.39	4.82	9.41	8.66	9.27	11.95	7.52	10.43	7.59	5.56	4.38	5.99	Smek2	SMEK homolog 2, suppressor of mek1,SMEK homolog 2, suppressor of mek1,SMEK homolog 2, suppressor of mek1,SMEK homolog 2, suppressor of mek1,
104582	0	0.16	0	0.12	0	0.34	0.21	0.23	0.97	0.74	0.06	0.56	0	0.77	0	0.45	0	0	Rprml	reprimo-like
104601	0	0	0	0	0	0	0	0	0	0.02	0.01	0.03	0.04	0.06	0.02	0	0	0	Mycbpap	Myc-binding protein-associated protein,Myc-binding protein-associated protein,Myc-binding protein-associated protein,Myc-binding protein-associated protein,
104625	3.55	3.54	2.89	4.61	3.63	3.01	2.43	2.95	4.17	3.64	3.16	3.99	5.89	11.37	6.2	2.33	3.38	4.31	Cnot6	CCR4-NOT transcription complex, subunit 6,CCR4-NOT transcription complex, subunit 6,CCR4-NOT transcription complex, subunit 6,
104662	11.01	10.65	12.17	13.14	14.27	13.45	13.51	11.46	49.36	54.33	33.73	61.67	36.58	45.27	32.67	9.74	11.65	12.16	Tsr1	TSR1, 20S rRNA accumulation,TSR1, 20S rRNA accumulation,
104681	2.43	3.54	2.73	2.69	2.33	1.99	3.16	1.96	1.41	1.93	1.43	1.86	4.16	8.64	3.61	1.36	2.1	3.21	Slc16a6	solute carrier family 16, member 6 isoform b
104709	0.65	1.17	1.22	0.99	0.85	0.85	0.9	0.85	0.92	0.54	0.55	0.75	1.07	3.24	1.64	0.58	1.07	1.25	BB220380	p87 phosphoinositide 3-kinase gamma adapter,p87 phosphoinositide 3-kinase gamma adapter,
104721	45.2	44.43	50.12	53.7	55.69	55.36	39.98	39.23	47.19	47.16	46.55	53.08	57.93	46.34	47.07	48.35	49.66	55.02	Ddx1	DEAD (Asp-Glu-Ala-Asp) box polypeptide 1
104725	12.12	15.8	13.08	14.75	17.69	8.93	18.1	12.44	26.71	21.09	35.6	21.36	23.29	29.94	24.11	11.42	7.37	11.79	1110002B05Rik	hypothetical protein LOC104725
104732	0	0	0.05	0.02	0.07	0	0	0	0.04	0.05	0	0	1.3	2.67	0.66	0	0.24	0	4930427A07Rik	hypothetical protein LOC104732
104759	1.65	1.58	1.48	1.45	1.36	1.12	1.69	2.37	1.55	1.92	1.05	1.3	9.77	23.43	5.96	1.34	1.6	0.47	Pld4	phospholipase D family, member 4,phospholipase D family, member 4,
104771	2.9	4.68	5.54	5.88	4.73	3.26	4.76	5.51	6.02	5.32	4.1	6.32	7.77	11.3	7.27	5.02	3.54	4.71	1200003C05Rik	JNK1-associated membrane protein,JNK1-associated membrane protein,
104776	40.53	43.1	38.42	47.44	42.2	48.9	50.6	52.72	43.78	50.6	27.72	49.27	23.42	15.36	30.52	36.85	44.29	37.63	Aldh6a1	aldehyde dehydrogenase family 6, subfamily A1
104799	3.39	4.61	2.41	4.13	3.18	3.48	4.53	4.96	6.68	6.78	8.54	8.62	9.15	12.31	7	3.26	3.94	2.27	AI413782	hypothetical protein LOC104799,hypothetical protein LOC104799,hypothetical protein LOC104799,hypothetical protein LOC104799,
104806	0.32	0.39	0.28	0.46	0.4	0.28	0.31	0.46	0.66	1.01	0.59	0.87	1.02	1.6	0.89	0.52	0.32	0.38	Fancm	Fanconi anemia, complementation group M,Fanconi anemia, complementation group M,
104816	0.03	0	0.08	0	0	0.06	0.09	0	0	0.24	0	0.08	0.04	0.14	0	0.09	0	0	A530050D06Rik	hypothetical protein LOC104816
104831	2.76	3.18	2.74	2.91	2.48	3.62	4.27	4	8.37	10.69	3.61	9.5	7.52	16.55	8.88	1.84	3.04	1.75	Ptpn23	protein tyrosine phosphatase, non-receptor type
104836	2.17	3.07	2.58	2.95	3.46	2.79	2.87	3.63	7.49	7.08	6.65	8.3	5.64	6.7	4.48	2.76	2.48	5.04	Cbll1	Casitas B-lineage lymphoma-like 1,Casitas B-lineage lymphoma-like 1,Casitas B-lineage lymphoma-like 1,
104859	1.02	1.01	1.05	0.98	1.16	1.12	1.56	1.53	0.71	1.25	0.63	1.32	1.67	2.54	1.84	0.76	1.23	1.13	4930573I19Rik	hypothetical protein LOC104859,hypothetical protein LOC104859,
104871	0.73	0.8	1.32	0.87	1.03	0.89	0.93	1.97	0.74	0.74	0.79	1.09	1.51	2.71	1.85	1.19	0.95	1.65	Spata7	spermatogenesis associated 7,spermatogenesis associated 7,
104884	1.05	1.14	1.08	0.9	1.03	0.86	1.14	1.73	0.69	0.83	0.71	0.82	2.54	4.63	1.44	0.83	1.08	1.16	Tdp1	tyrosyl-DNA phodphodiesterase 1,tyrosyl-DNA phodphodiesterase 1,tyrosyl-DNA phodphodiesterase 1,
104885	0	0.09	0.08	0.03	0.03	0.06	0.18	0.07	0	0.25	0	0.06	0.16	0.15	0	0	0	0.15	Tmem179	hypothetical protein LOC104885
104886	1.75	3.38	1.39	2.87	1.17	1.1	1.04	1.32	1.23	1.8	1.51	0.82	6.05	4.62	1.15	0.92	1.62	0.62	Rab15	RAB15, member RAS oncogene family
104910	0.85	1.47	0.5	0.96	0.31	1.04	0.97	0.71	0.57	0.84	0.43	0.63	1.27	1.12	0.67	0.45	2.07	0.67	AI132487	mitochondrial hepatocellular
104923	43.81	33.06	36.48	34.84	36.87	39.18	45.9	31.94	62.72	53.65	74.84	65.39	50.23	22.49	55.25	73.11	40.51	44.98	Adi1	acireductone dioxygenase 1
104943	0.19	0	0.07	0	0	0	0	0.12	0	0.04	0.03	0	0	0.27	0	0	0.06	0	9030611O19Rik	hypothetical protein LOC104943
105000	1.11	0.47	0.84	0.95	1.15	0.56	1.05	1.61	0.64	0.44	0.63	0.5	1.36	0.9	1.02	0.22	1.66	1.01	Dnalc1	axonemal dynein light chain 1
105005	0	0.06	0	0.02	0.04	0.09	0	0.04	0	0.11	0	0.02	0.16	0.29	0	0	0.16	0	AW125753	expressed sequence AW125753
105014	16.08	19.13	16.73	20.73	17.82	15.1	15.79	16.46	9.34	12.01	7.49	10.4	16.39	9.02	13.28	19.57	18.91	21.52	Rdh14	alcohol dehydrogenase PAN2
105083	6.5	5.7	5.81	5.68	4.63	5.16	6.18	7	13.07	11.19	4.23	9.39	11.04	15.47	11.15	5.56	7.17	6.78	Pelo	pelota homolog,pelota homolog,
105148	21.36	19.69	18.11	20.97	20.58	18.52	17.51	17.96	8.37	11.1	9.93	10.83	18.31	21.34	16.95	19.08	23.24	19.01	Iars	isoleucyl-tRNA synthetase
105171	7.6	10.41	17.81	11.24	21.24	49.06	37.67	58.83	14.77	18.36	12.32	22.53	15.01	14.83	21.13	14.79	5.64	14.1	Arrdc3	arrestin domain containing 3
105193	3.38	4.03	2.76	2.94	2.56	3.31	3.71	2.47	0.53	0.81	0.89	0.64	3.85	1.7	1.76	3.1	3.1	2.45	Nhlrc1	NHL repeat containing 1
105243	0.02	0.05	0.05	0.04	0.04	0.13	0.16	0.19	0.14	0.17	0.07	0.12	0.25	0.21	0.27	0.09	0.07	0.11	Slc9a3	solute carrier family 9 (sodium/hydrogen
105245	12.39	12.87	12.97	12.11	13.11	14.05	15.59	16.81	10.54	13.47	6.35	11.51	29.7	60.23	17.88	11.63	19.3	7.8	Txndc5	thioredoxin domain containing 5,thioredoxin domain containing 5,thioredoxin domain containing 5,thioredoxin domain containing 5,
105246	4.99	4.24	5.86	4.62	6.37	6.48	3.95	4.65	5.65	6.22	3.88	4.76	9.59	10.18	6.66	5.08	5.37	4.65	Brd9	bromodomain containing 9,bromodomain containing 9,bromodomain containing 9,bromodomain containing 9,
105278	1.42	1.01	1.79	1.12	1.44	1.62	1.77	0.63	1.13	0.87	0.42	1.06	2.61	7.56	3	0.33	1.15	0.32	Ccrk	cell cycle related kinase
105298	49.36	63.21	54.79	58.75	49.66	41.59	47.26	47.97	35.18	42.3	30.46	35.82	49.2	24.96	36.67	35.41	48.13	41.27	Epdr1	ependymin 2
105348	1.78	2.42	1.99	1.64	1.77	3.17	2.38	3.49	1.19	1.86	16.09	1.92	5.35	7.49	4.75	3.43	2.64	2.5	Golm1	golgi membrane protein 1
105349	0.15	0.31	0.28	0.06	0.19	0	0.05	0.06	0.58	0.29	0	0.19	0.34	0.56	0	0	0.1	0	Akr1c18	aldo-keto reductase family 1, member C18,aldo-keto reductase family 1, member C18,
105351	7.69	7.33	5.54	5.92	8.27	5.5	7.23	6.06	6.73	5.7	10.28	5.73	6.96	5.72	6.76	7.8	8.25	7.42	AW209491	hypothetical protein LOC105351,hypothetical protein LOC105351,
105352	12.97	12.6	13.45	16.41	12.12	10.71	13.59	14.4	8.91	13.42	15.21	9.36	12.14	9.99	7.53	12.38	11.35	15.03	Dusp22	dual specificity phosphatase TS-DSP2 isoform b,dual specificity phosphatase TS-DSP2 isoform b,
105372	1.4	2.11	2.26	2.57	2.61	1.71	2.29	1.33	3.55	3.41	2.76	3.77	5.6	7.99	4.86	2.05	2.25	1.65	Utp15	UTP15, U3 small nucleolar ribonucleoprotein,
105377	2.25	1.68	1.62	2.48	2.4	3.16	2.31	2.15	1.67	1.96	3.14	2.43	4.19	3.64	2.81	3.13	2.32	2.46	Ankrd32	ankyrin repeat domain 32
105387	0.4	1.95	1.11	1.77	1.16	1.21	1.24	0.73	0.63	0.58	0.62	1.39	1.68	0.31	0.44	1.49	1.89	1.25	Akr1c14	aldo-keto reductase family 1, member C14
105418	0	0	0.06	0	0	0	0	0	0	0.06	0.05	0.07	0.05	0.05	0.05	0	0	0	E330034G19Rik	hypothetical protein LOC105418,hypothetical protein LOC105418,hypothetical protein LOC105418,
105428	5.71	6.46	3.66	5.62	5.21	5.34	6.45	6.66	6.85	8.64	2.6	8.12	5.33	7.85	4.17	7.48	6.4	5.71	AA536717	hypothetical protein LOC105428 isoform 2
105439	0	0	0	0.01	0	0	0	0	0.02	0	0	0.01	0	0	0	0.05	0.02	0	Slain1	SLAIN motif family, member 1,SLAIN motif family, member 1,
105440	15.68	19.21	19.76	22.14	22	21.83	16.87	22.14	20.92	18.73	33	22.24	27.47	21.38	25.75	23.68	18.9	25.43	Kctd9	potassium channel tetramerisation domain
105445	4.6	3.73	4.4	4.55	3.75	4.72	4.38	6.66	4.34	4.39	4.29	5.3	6.08	7.68	8.57	6.36	4.71	4.41	Dock9	dedicator of cytokinesis 9,dedicator of cytokinesis 9,dedicator of cytokinesis 9,dedicator of cytokinesis 9,
105446	2.01	2.66	2.05	2.52	2.27	2.32	2.59	2.27	16.97	16.83	10.89	19.31	13.88	14.18	8.82	1.14	2.76	2.8	Gmpr2	guanosine monophosphate reductase 2
105450	7.84	6.24	6.5	5.24	6.13	5.93	5.88	5.02	8.34	7.07	5.42	5.97	7.56	13.46	9.2	5.69	7.32	5.02	Mmrn2	elastin microfibril interfacer 3
105501	8.27	7.73	9.31	6.42	8.83	7.78	9.05	9.26	14.22	14.64	12.01	16.51	15.7	22.86	16.51	7.33	7.31	5.71	Abhd4	abhydrolase domain containing 4,abhydrolase domain containing 4,abhydrolase domain containing 4,
105504	7.13	7.12	7.28	7.83	9.42	8.24	5.57	5.84	6.08	5.86	8.25	7.64	10.46	12.87	10.18	10.5	9.68	8.9	Exoc5	exocyst complex component 5
105513	17.39	15.39	15.95	17.21	13.92	15.58	13.86	13.1	11.01	10.88	9.72	9.37	18.52	19.64	16.33	12.64	15.74	11.37	Chmp7	CHMP family, member 7
105522	12.95	13.76	15.84	15.05	18.58	13.67	14.64	13.65	9.04	11.51	12.88	13.98	17.1	15.2	19.48	17.39	17.05	19.07	Ankrd28	ankyrin repeat domain 28,ankyrin repeat domain 28,
105559	47.44	52.28	50.31	57.07	50.44	42.64	48.26	65.03	20.59	30.8	52.81	31.51	52.12	50.39	50.16	45.31	47.74	43.7	Mbnl2	muscleblind-like 2 isoform 2,muscleblind-like 2 isoform 2,
105590	0.1	0.46	0.05	0.11	0.02	0	0.04	0	0.08	0.23	0.16	0.09	0.13	0.05	0.22	0	0.1	0	AU017455	hypothetical protein LOC105590
105638	45.04	37.45	49.83	40.73	46.01	34.45	39.31	35.12	69.35	44.19	53.38	52.68	70.49	41.07	39.97	52.96	43.96	63.83	Dph3	zinc finger, CSL domain containing 2 isoform 1,zinc finger, CSL domain containing 2 isoform 1,
105653	0.12	0.3	0.16	0.09	0.06	0.09	0.24	0	0.08	0.22	0.04	0.4	0.41	0.48	0.28	0.17	0.28	0	Phyhip	phytanoyl-CoA hydroxylase interacting protein
105663	6.33	7.46	8.42	7.89	8.16	7.3	8.53	6.97	15.63	16.05	6.22	14.3	11.61	7.76	11.92	7.25	8	6.37	Thtpa	thiamine triphosphatase
105670	8.69	7.26	6.55	6.96	7.45	5.77	6.47	5.97	6.81	8.13	3.66	8.46	9.61	8.77	6.66	6.83	5.44	6.8	Rcbtb2	chromosome condensation 1-like,chromosome condensation 1-like,chromosome condensation 1-like,
105675	9.39	10.13	13.58	10.59	10.68	9.94	14.83	12.93	8.65	10.85	7.23	8.41	11.49	8.73	10.63	13.8	12.31	14.32	Ppif	peptidylprolyl isomerase F
105689	3.64	4.1	4	4.51	4.42	4.26	3.94	4.48	3.53	4.36	3.67	4.82	4.9	7.49	5.45	4.71	3.58	4.56	Phr1	pam, highwire, rpm 1,pam, highwire, rpm 1,
105722	9.93	10.37	10.56	10.28	10.86	7.59	7.89	9.65	6.02	5.98	4.77	6.29	13.45	25.26	15.18	9.06	12.07	8.55	Tmem16f	transmembrane protein 16F,transmembrane protein 16F,
105727	0.07	0.22	0.05	0.35	0.27	0.27	0.33	0.16	0.07	0.25	0.22	0.31	2.23	2.35	1.05	0.04	0.07	0	Slc38a1	solute carrier family 38, member 1,solute carrier family 38, member 1,solute carrier family 38, member 1,solute carrier family 38, member 1,solute carrier family 38, member 1,
105732	0.03	0.06	0.03	0.07	0.07	0.08	0.17	0.27	0.16	0.28	0.17	0.21	0.57	1.47	0.82	0.3	0.19	0.02	AA409316	hypothetical protein LOC105732,hypothetical protein LOC105732,
105734	0.43	0.35	0.62	0.33	0.43	0.65	0.64	0.5	0.4	1	0.38	0.79	1.4	1.18	0.9	0.69	0.6	0.41	Tigd5	tigger transposable element derived 5
105782	6.43	5.74	5.49	5.21	5.23	6.1	7.12	6.28	8.16	9.58	3.3	8.06	9.22	17.6	10.62	4.56	6.65	4.14	Scrib	PDZ-domain protein scribble,PDZ-domain protein scribble,PDZ-domain protein scribble,PDZ-domain protein scribble,
105785	1.88	0.87	1.94	1.42	2.06	0.77	1.94	0.94	1.76	1.01	0.67	1.94	5.54	13.91	3.65	0.93	0.64	0.79	Kdelr3	KDEL (Lys-Asp-Glu-Leu) endoplasmic reticulum
105787	3.84	4.69	4	5.12	4.93	3	4.29	6.66	8.27	7.91	5.54	9.29	12.13	13.65	12.27	3.24	4.58	4.38	Prkaa1	protein kinase, AMP-activated, alpha 1 catalytic
105827	0.82	1.38	0.95	1.53	0.81	1.21	1.89	2.23	0.91	2.48	1.48	1.94	1.91	2.27	2.33	1.28	1.39	1.91	Amigo2	amphoterin induced gene 2
105833	0.03	0	0	0.03	0	0.06	0.03	0	0.03	0.24	0	0	0	0.17	0	0	0.11	0.07	Ccdc65	coiled-coil domain containing 65
105835	6.05	5.89	5.05	5.47	4.63	6.24	7.24	6.56	6.11	6.4	2.85	6.55	7.1	7.35	7.56	5.52	6.04	5.27	Sgsm3	small G protein signaling modulator 3
105837	0.36	0.13	0.31	0.33	0.36	0.11	0.27	0.66	0.56	0.37	0.28	0.64	1.01	2.21	1	0.15	0.26	0.45	Mtbp	MDM2 Binding protein,MDM2 Binding protein,
105841	1.03	0.61	1.02	0.88	0.97	1.08	0.89	0.99	0.77	0.96	0.32	0.66	0.83	2.32	1.9	0.54	0.5	0.76	Dennd3	DENN/MADD domain containing 3
105844	4.1	3.82	3.07	2.88	2.09	3.28	3.61	4.61	3.16	3.58	1.36	2.74	3.76	5.72	3.74	2.11	2.85	1.49	Card10	caspase recruitment domain family, member 10,caspase recruitment domain family, member 10,
105847	5	4.92	4.36	4.02	4.38	4.14	5.93	5.56	5.92	5.6	2.58	4.76	9.97	19.78	9.69	4.21	5.13	3.88	Tmem112b	hypothetical protein LOC105847
105853	0.08	0.13	0	0	0	0	0	0.19	0	0	0	0	0	0.21	0	0	0	0	Mal2	MAL2 proteolipid protein
105855	0.35	0.49	0.29	0.67	0.33	0.53	0.28	0.59	0.43	0.69	0.31	0.44	7.25	19.63	4.13	0.38	0.67	0.25	Nckap1l	NCK associated protein 1 like,NCK associated protein 1 like,
105859	0.27	0.43	0.38	0.37	0.24	0.2	0.75	0.61	0	0.4	0.26	0.3	0.24	0.57	1.02	0.1	0	0	Csdc2	RNA-binding protein pippin
105866	0	0	0	0	0	0	0	0	0	0	0	0	0	2.75	0	0	0	0	Krt72	keratin 72
105887	0	0	0	0	0	0	0	0	0.08	0.07	0.07	0.04	0	0	0	0	0	0	Ugt3a1	UDP glycosyltransferases 3 family, polypeptide
105892	0	0	0.57	0	0.23	0	0	0	0	0.6	0	0	0	0	0	0	0	0	9030619P08Rik	RIKEN cDNA 9030619P08
105988	0.03	0.01	0.03	0.06	0.03	0.07	0.04	0.08	0.1	0.16	0.05	0.19	1.33	2.67	1.23	0.01	0.06	0.01	Espl1	extra spindle poles-like 1,extra spindle poles-like 1,
106014	0.62	2.72	2.07	1.87	1.87	1.78	1.02	1.96	0.52	0.36	0.71	0.74	1	2.81	3.09	1.37	1.02	0.78	AW049604	TAFA5 protein
106021	3.02	3.37	3.69	3.46	3.54	2.62	3.28	2.15	12.48	17.03	6.73	17.84	8.99	12.55	9.56	4.32	3.67	3.33	Topors	topoisomerase 1-binding RING finger
106025	10.66	13.24	11.38	10.97	10.63	12.75	15.63	13.3	13.32	14.71	5.46	12.94	13.61	17.27	13.36	9.41	9.08	10.54	Sharpin	SHANK-associated RH domain interacting protein
106039	19.43	19.91	23.06	18.62	17.27	19.66	22.97	23.83	19.84	22.95	12.27	19.01	22.8	32.95	23.3	18.91	19.77	16.95	Gga1	golgi associated, gamma adaptin ear containing,
106042	1.63	1.64	1.39	1.46	0.98	1.64	2.47	2.55	1.44	2.23	0.97	1.84	1.86	1.97	1.51	1.17	1.57	1.64	Prickle1	prickle like 1,prickle like 1,
106052	2.04	1.97	1.84	2.45	2.71	1.51	1.59	1.77	3.29	4.15	3.16	3.67	5.85	6.28	3.65	1.95	2.76	2.11	Fbxo4	F-box protein 4
106064	3.49	4.02	4.04	5.51	5.42	4.61	5.74	5.36	4.91	5.47	15.37	4.91	6.21	7.17	7.54	3.49	4.88	2.13	AW549877	hypothetical protein LOC106064,hypothetical protein LOC106064,
106068	5.43	5.07	7.27	4.25	6.74	4.01	7.09	4.13	4.26	6.08	3.6	4.41	6.83	9.69	6.04	7.63	5.73	7.35	Slc45a4	solute carrier family 45, member 4,solute carrier family 45, member 4,solute carrier family 45, member 4,
106073	5.77	8.13	5.55	7.46	5.79	7.69	9.36	7.72	13.98	13.23	12.14	9.87	16.22	27.82	14.78	7.73	6.71	5.29	D15Mgi27	hypothetical protein LOC106073
106143	6.91	8.09	6.88	7.03	8.54	4.71	7.5	8.44	8.98	8.28	3.22	7.48	12.81	19.81	9.66	6.18	7.96	9.09	Cggbp1	CGG triplet repeat binding protein 1,CGG triplet repeat binding protein 1,
106200	4	5.26	3.66	4.04	2.83	3.62	5.54	3.36	12.22	14.69	3.34	11.86	9.71	14.42	6.93	2.88	3.33	2.8	Txndc11	thioredoxin domain containing 11 isoform 1,thioredoxin domain containing 11 isoform 1,
106248	2.77	2.97	2.81	3.21	2.84	4.84	4.68	2.84	5.7	6.87	5.61	7.76	8.8	6.73	6.78	2.74	3.43	2.84	Qtrtd1	queuine tRNA-ribosyltransferase domain
106298	12.14	13.03	13.49	15.91	15.27	11.34	13.26	14.37	13.85	15.26	9.24	15.71	15.68	19.24	15.93	15.13	12.56	13.45	Rrn3	RRN3 RNA polymerase I transcription factor
106326	5.6	4.45	5.8	5.29	5.55	4.89	5.22	5.18	5.03	5.96	6.83	7.02	10.29	14.44	8.18	5.68	5.16	5.95	Osbpl11	oxysterol binding protein-like 11
106338	2.59	1.55	2.17	2.59	1.98	1.39	1.95	1.58	3.69	5.12	3.73	4.94	2.31	2.57	2.41	1.22	2.93	2.24	Nsun3	NOL1/NOP2/Sun domain family 3
106344	3.83	3.65	2.5	3.02	2.78	3.94	2.77	2.09	2.64	3.24	1.6	3.39	5.22	6.64	3.68	3.21	2.53	5.28	Rfc4	replication factor C (activator 1) 4
106347	0	0	0.11	0	0.03	0.06	0	0.09	0	0	0	0	0	0	0	0	0	0	Ildr1	immunoglobulin-like domain containing receptor
106369	0.3	0.94	0.21	0.62	0.16	0	0.47	0.52	0.8	0.66	0	1	0.81	0.95	1.33	0.17	0.15	0	Ypel1	yippee-like 1,yippee-like 1,
106389	0	0	0	0.08	0.3	0	0	0	0	0	0	0.08	1.31	0.52	0.35	0.31	0.14	0.7	Eaf2	ELL associated factor 2
106393	260.58	254.18	267.89	268.51	273.13	261.05	265.11	276.92	145.37	167.47	203.06	178.94	127.76	54.05	164.95	269.64	273.21	252.89	Srl	sarcalumenin,sarcalumenin,
106407	0	0	0	0	0	0.05	0.19	0.05	0.83	0.27	0.4	0.61	0.25	0.29	0.52	0	0	0.12	Osta	organic solute transporter alpha
106489	5.75	4.75	6.21	4.65	3.44	4.77	2.19	2.77	13.13	13.63	7.36	11.16	18.09	32.25	13.66	5.13	3.12	2.4	n/a	n/a
106504	7.22	7.23	7.13	9.14	8.61	5.87	6.58	9.55	7.79	7.33	8.3	8.72	13.91	15.87	8.12	7.76	8.95	8.21	Stk38	serine/threonine kinase 38,serine/threonine kinase 38,
106512	0.87	0.9	1.34	1.06	0.83	0.21	1.59	0.98	1.32	1.81	1.48	0.95	3.77	11.14	2.16	0	1.38	0.48	Gpsm3	G-protein signalling modulator 3 (AGS3-like, C.
106522	30.5	22.76	34.89	20.76	27.55	21.24	31.1	18.14	37.9	29.21	37.12	25.92	23.19	13.72	28.3	44.93	22.61	23.15	AW548124	hypothetical protein LOC106522
106529	163.1	213.51	180.43	202.71	172.89	155.45	197.29	199.85	180.15	170.13	185.2	158.07	181.13	92.22	180.68	217.27	184.28	232.87	Gpsn2	glycoprotein, synaptic 2,glycoprotein, synaptic 2,
106557	0.03	0.05	0.08	0.25	0.13	0.07	0.36	0.2	0.12	0.3	0.47	0.54	0.24	0.18	0.25	0.13	0.12	0	Ldhal6b	lactate dehydrogenase A-like 6B
106564	1.97	2.1	2.52	2.93	2.51	2.44	2.62	1.81	3.9	4.67	2.15	2.97	5.79	4.47	6.34	3.31	2.95	3.16	Ppcs	phosphopantothenoylcysteine synthetase
106565	0.09	0.1	0	0.05	0.03	0.1	0	0.07	0.06	0.13	0.09	0.05	0.53	1.21	0.56	0	0.03	0.23	Dlk2	EGF-like-domain, multiple 9,EGF-like-domain, multiple 9,EGF-like-domain, multiple 9,
106572	0.57	2.69	1.32	2.07	2.08	1.79	1.69	2.83	3.52	1.93	2.71	2.95	13.39	22.75	6.85	1.9	2.25	0.24	Rab31	Rab31-like
106581	16.16	21.65	20.59	21.19	18.24	17.83	20.25	18.8	18.13	22.23	16.54	20.32	24.82	25.16	21.36	19.12	19.34	15.87	Itfg3	integrin alpha FG-GAP repeat containing 3,integrin alpha FG-GAP repeat containing 3,
106582	1.06	0.16	0.91	0.9	0.97	1.39	0.67	0.91	0.96	1.09	0.92	1.04	3.81	9.71	4.32	0.56	0.78	0.88	Nrm	nurim
106585	2.78	2.69	3	3.46	3.46	4.08	3.09	4.01	7.8	5.95	8.06	7.18	8.03	7.26	6.93	5.75	5.35	5.3	Ankrd12	ankyrin repeat domain 12,ankyrin repeat domain 12,
106628	61.43	60.53	60.6	52.54	53.8	79.01	69.53	74.92	67.16	58.84	71.52	52.21	75.17	52.42	67.28	77.82	76.82	73.13	Trip10	thyroid hormone receptor interactor 10,thyroid hormone receptor interactor 10,thyroid hormone receptor interactor 10,thyroid hormone receptor interactor 10,
106633	1.3	0.73	0.82	0.77	1.08	0.85	0.98	1.08	1.11	0.97	0.67	1.32	1.45	2.52	1.35	0.72	1.16	0.53	Ift140	intraflagellar transport 140,intraflagellar transport 140,
106639	0.86	1.13	1.2	1.16	0.31	0.4	1.62	0.89	1.36	1.77	0.41	0.97	0.78	1.44	1.69	0.64	0.59	0.36	AI662250	vimentin-type IF-associated coiled-coil protein
106648	0.17	0.04	0.12	0.16	0.1	0.12	0.03	0	0.15	0.08	0.11	0.2	0.11	0.07	0.1	0.19	0.03	0.24	Cyp4f15	cytochrome P450, family 4, subfamily f,,cytochrome P450, family 4, subfamily f,,
106672	2.39	4.61	3.83	1.83	1.2	0.81	2.48	4.6	11.24	18.63	4.39	11.82	10.67	18.82	7.61	3.66	2.08	1.38	AI413582	hypothetical protein LOC106672
106707	2.46	2.34	1.22	1.78	1.6	1.65	2.98	2.52	1.53	2.22	0.55	2.5	5.15	4.99	3.27	2.53	2.03	1.32	Rpusd1	RNA pseudouridylate synthase domain containing,RNA pseudouridylate synthase domain containing,
106722	0	0	0	0.08	0	0	0	0	0	0	0	0	0.2	0	0	0	0	0	AU023871	hypothetical protein LOC106722
106759	1.57	1.63	1.76	1.35	2.08	3.46	4.05	3.06	5.71	7.79	6.25	7.83	5.82	4.76	4.42	1.1	1.34	1.46	Ticam1	TICAM-1,TICAM-1,
106766	1.97	2.43	2.15	1.89	2.32	2.69	2.92	2.24	2.3	2.06	1.65	1.63	4.13	6.2	4.15	3.57	1.08	1.26	Stap2	signal transducing adaptor family member 2
106794	2.76	2.75	2.98	2.58	2.68	3.21	2.47	3.23	1.92	2.19	1.58	2.28	2.92	3.16	3.05	3.16	3.15	1.92	Dhx57	DEAH (Asp-Glu-Ala-Asp/His) box polypeptide 57,DEAH (Asp-Glu-Ala-Asp/His) box polypeptide 57,DEAH (Asp-Glu-Ala-Asp/His) box polypeptide 57,
106795	0.32	0.29	0.38	0.42	0.24	0.3	0.09	0.31	0.43	0.27	0.1	0.25	4.08	10.67	3.11	0.25	0.38	0.63	Tcf19	transcription factor 19,transcription factor 19,
106821	13.15	16.6	12.81	13.41	13.94	14.4	9.82	10.88	6.68	6.51	9.45	7.35	12.6	11.37	9.12	11.87	16.22	8.95	AI314976	hypothetical protein LOC106821,hypothetical protein LOC106821,hypothetical protein LOC106821,
106840	6.88	5.03	4.62	5.12	4.69	2.37	4.47	4.06	1.96	3.1	1.31	3.28	5.25	11.01	5.61	3.18	3.41	3.74	Unc119b	unc-119 homolog B
106861	0.14	0.39	0.25	0.43	0.36	0.24	0.33	0.2	0.26	0.26	0.26	0.35	0.77	0.22	0.53	0.12	0	0.18	Abhd3	abhydrolase domain containing 3
106869	1.48	2.22	1.37	1.81	0.82	1.57	1.39	1.31	1.89	1.78	0.98	2.07	5.07	14.43	3.27	1.02	0.89	1.08	Tnfaip8	tumor necrosis factor, alpha-induced protein 8
106877	13.56	16.61	15.69	14.87	13.83	13.25	16.27	14.05	11.66	12.52	4.43	11.12	26.04	23.61	23.59	13.57	16.51	13.6	Afap1l1	actin filament associated protein 1-like 1
106878	0.44	0.69	0.61	1.15	1.54	0.24	0.23	2.24	0.93	1.28	1.01	0.36	2.69	14.94	2.75	1.71	0.23	0.83	2010002N04Rik	putative small membrane protein NID67
106894	4.08	3.88	3.67	4.56	5.19	3.72	4.9	4.45	6.05	5.68	6.66	6.04	5.97	8.6	7.5	4.11	4.07	3.37	A630042L21Rik	hypothetical protein LOC106894 isoform 2,hypothetical protein LOC106894 isoform 2,
106931	1.67	1.03	0.63	0.58	0.62	1.11	1.66	1.3	1.22	0.44	0.83	1.64	1.56	3.03	1.19	0.89	0.98	0.38	Kctd1	potassium channel tetramerisation domain,potassium channel tetramerisation domain,potassium channel tetramerisation domain,
106947	7.34	6.38	6.02	4.79	4.31	6.92	7.24	7.05	3.67	4.82	1.58	3.83	7.34	8.44	7.14	4.67	7.68	3.15	Slc39a3	solute carrier family 39 (zinc transporter),,solute carrier family 39 (zinc transporter),,solute carrier family 39 (zinc transporter),,
106952	3.09	3.72	3.21	3.31	2.97	3.58	3.79	4.53	3.69	3.04	2.31	3.6	3.74	7.07	4.38	2.73	3.45	2.68	Centd3	centaurin, delta 3,centaurin, delta 3,centaurin, delta 3,centaurin, delta 3,
106957	0.74	0.98	0.62	0.84	0.58	0.6	0.83	0.8	0.99	0.67	0.41	0.7	2.56	8.61	2.45	0.51	0.58	0.77	Slc39a6	solute carrier family 39 (metal ion
107022	2.79	4.43	2.47	4.78	2.9	3.67	3.15	4.83	3.07	2.69	2.85	2.51	7.7	9.82	7.87	4.03	2.24	5.37	Gramd3	GRAM domain containing 3,GRAM domain containing 3,GRAM domain containing 3,
107029	0.79	1.28	1.42	1.31	1.7	1.16	1.6	1.01	3.58	3.23	3.47	3.72	11.21	14.58	7.02	1.63	1.4	0.99	Me2	malic enzyme 2, NAD(+)-dependent, mitochondrial
107035	5.93	4.75	5.26	5.68	6.29	4.81	5.08	5.74	7.91	8.11	7.39	9.3	9.78	10.78	9.38	7.31	5.59	6.11	Fbxo38	MoKA,MoKA,
107045	12.47	12.89	12.66	14.36	13.56	13.98	12.99	13.11	15.87	15.46	14.55	16.7	19.25	22.3	16.8	13.66	15.71	13.59	Lars	leucyl-tRNA synthetase
107047	9.71	12.49	12.23	12.43	14.55	10.4	9.85	10.37	12.8	9.47	5.76	11.07	18.95	20.37	14.87	15.55	10.51	20.19	Tnfsf5ip1	Clast3 protein
107065	0	0.07	0	0.05	0	0	0.04	0	0	0	0.05	0.1	0	0.05	0	0	0.13	0	Lrrtm2	leucine rich repeat transmembrane neuronal 2
107071	5.74	6.59	5.37	5.42	5.22	4.28	6.65	6.45	9.05	11.01	5.2	10.53	14.97	18.38	8.94	5.6	5.98	5.75	Wdr74	WD repeat domain 74
107094	13.38	14.63	12.38	12.5	10.92	12.29	11.29	12.66	9.81	12.45	11.32	11.21	26.3	27.62	19.35	10.82	13.38	9.48	Rrp12	ribosomal RNA processing 12 homolog
107146	0	0	0	0	0.05	0	0.05	0	0	0	0	0	0	0	0	0	0	0	Glyat	glycine-N-acyltransferase
107173	3.95	3.03	4.28	2.7	3.25	2.18	2.88	3.89	2.19	3	0.79	2.56	5.55	8.06	3.52	2.87	3.45	2.73	Gpr137	expressed sequence AI428855
107182	2.26	2.49	1.78	2.67	2.6	2.65	2.44	2.01	3.35	3.97	2.06	4.81	4.4	5.69	4.32	1.72	2.03	2.6	Btaf1	BTAF1 RNA polymerase II, B-TFIID transcription
107221	0.1	0.21	0.09	0.04	0	0	0	0.07	0	0.05	0.04	0.05	0.27	0.08	0	0.07	0.07	0	Gpr120	G protein-coupled receptor 120
107227	99.01	106.53	96.91	87.55	82.07	98.95	110	89.27	113.24	107.15	79.11	83.32	93.4	48.19	87.1	99.34	97.75	90.95	Macrod1	LRP16 protein
107250	2.9	4.28	4.42	3.2	3.67	2.75	4.86	2.25	2.37	1.83	0.7	1.35	1.82	0.87	1.16	1.54	2.93	1.38	Kazald1	Kazal-type serine peptidase inhibitor domain 1,Kazal-type serine peptidase inhibitor domain 1,
107260	22.2	21.81	19.82	20.16	18.8	25.29	21.21	24.05	24.11	26.47	12.98	21.97	36.5	40.52	35.65	24.75	25.14	22.03	Otub1	otubain 1
107271	20.43	16.03	20.16	19.1	17.55	23.57	19.56	21.53	24.11	22.31	19.68	20.64	23.56	29.33	24.1	19.05	21.47	18.93	Yars	tyrosyl-tRNA synthetase
107272	1.52	1.16	0.63	0.81	0.88	0.77	1.06	1.67	0.82	1.48	0.56	1.23	7.91	17.99	4.81	1.45	1.05	0.92	Psat1	phosphoserine aminotransferase 1,phosphoserine aminotransferase 1,phosphoserine aminotransferase 1,
107305	8.38	8.48	6.97	6.45	5.03	7.88	7.74	7.03	5.71	3.87	5.96	2.88	13.5	18.45	17.03	6.55	6.7	7.18	Vps37c	vacuolar protein sorting 37C,vacuolar protein sorting 37C,
107321	0.3	0.12	0.05	0.04	0.26	0.08	0.15	0.09	0.52	0.44	0.19	0.31	3.36	7.47	2.39	0.42	0.12	0.42	Lpxn	leupaxin
107338	11.94	12.49	12.55	12.65	12.26	10.63	13.82	12.31	17.3	22.86	11.56	22.89	18.42	27.43	22.36	11.49	12.06	8.48	Gbf1	golgi-specific brefeldin A-resistance factor 1,golgi-specific brefeldin A-resistance factor 1,golgi-specific brefeldin A-resistance factor 1,golgi-specific brefeldin A-resistance factor 1,
107351	5.54	5.24	5.61	4.69	5.45	5.29	4.82	5.21	8.18	6.44	12.34	6.82	8.96	7.6	11.31	6.06	6.08	5.39	Ankrd15	ankyrin repeat domain 15,ankyrin repeat domain 15,ankyrin repeat domain 15,
107358	19.54	19.15	19.48	21.19	24.44	18.38	11.93	14.93	10.17	9.37	14.87	10.7	25.27	41.13	17.12	24.01	21.22	27.75	Tm9sf3	transmembrane protein 9 superfamily member 3
107368	2.86	2.98	2.54	3.17	3.48	3.29	2.94	3.27	2.86	2.15	3.42	2.7	3.85	6.29	4.16	2.53	3.27	2.12	Pdzd8	PDZ domain containing 8
107371	21.13	21.47	19.54	22	21.8	17.07	16.14	14.78	19.66	16.39	16.15	20.45	16.62	11.3	18.16	21.81	24.3	24.91	Exoc6	exocyst complex component 6,exocyst complex component 6,
107373	1.09	0.52	0.64	0.85	1.16	0.8	0.7	0.97	2.08	1.02	1.91	1.19	6.98	15.26	4.97	0.78	0.93	0.79	4632417K18Rik	hypothetical protein LOC107373
107375	1.2	0.7	1.45	0.75	0.67	0.28	0.82	0.95	1.26	1.15	0.26	1.06	3.23	4.87	2.98	0.55	0.87	1	Slc25a45	solute carrier family 25, member 45,solute carrier family 25, member 45,
107392	11.71	7.69	10.94	8.11	9.45	11.11	8.79	7.39	13.64	12.24	11.97	11	22.71	27.42	16.33	8.56	10.46	10.4	Brms1	breast cancer metastasis-suppressor 1
107435	7	7.57	7.93	9.61	8.13	9.03	7.41	8.11	8.14	8.48	11.13	8.48	20.65	22.64	12.6	8.92	9.48	8.98	Hat1	histone aminotransferase 1,histone aminotransferase 1,
107448	3.13	2.73	3.55	2.46	2.76	2.69	3.48	3.08	0.6	0.91	1.71	1.11	2.27	1.59	1.6	2.85	2.91	1.04	Unc5a	netrin receptor Unc5h1,netrin receptor Unc5h1,
107449	1.12	1.12	0.81	0.84	0.97	0.48	0.9	0.7	0.94	0.99	0.26	0.69	0.85	1.08	0.89	0.37	0.7	1.13	Unc5b	unc-5 homolog B,unc-5 homolog B,unc-5 homolog B,
107476	2.72	2.57	2.63	2.77	2.36	3.69	3.02	2.87	4.18	3.82	1.87	4.31	3.12	6.82	3.05	2.29	2.62	1.53	Acaca	acetyl-Coenzyme A carboxylase alpha
107477	0.21	0.66	0.1	0.08	0.04	0.54	0.14	0.16	0.96	1.32	0.4	1.38	0.38	0.09	0.52	0	0.07	0	Guca1b	guanylate cyclase activator 1B
107503	22.41	29.43	19.82	24.8	15.25	20.09	24.2	25.92	12.67	14.18	12.65	12.08	17.84	28.1	15.68	11.45	24.25	17.97	Atf5	ativating transcription factor 5,ativating transcription factor 5,
107508	50.52	47.91	48.65	52.18	55.66	58.35	41.89	56.95	31.66	29.86	42.62	33.19	44.13	44.59	41.6	52.37	49.72	52.33	Eprs	glutamyl-prolyl-tRNA synthetase,glutamyl-prolyl-tRNA synthetase,glutamyl-prolyl-tRNA synthetase,
107513	29.94	28.84	25.59	27.49	26.88	34.51	26.47	26.8	41.16	33.35	35.52	38.16	54.12	63.52	44.31	25.45	31.02	29.2	Ssr1	signal sequence receptor, alpha,signal sequence receptor, alpha,
107515	7.64	7.09	6.66	7.85	8.89	6.42	6.61	6.62	5.15	5.02	4.16	5.11	5.4	4.55	6.45	5.79	6.3	7.4	Lgr4	G protein-coupled receptor 48
107527	0.17	0.19	0.36	0.43	0.31	0.32	0.56	0.59	0.38	0.62	0.37	0.57	1.61	4.65	1.21	0.29	0.59	0.03	Il1rl2	interleukin 1 receptor-like 2,interleukin 1 receptor-like 2,
107528	0.45	0.56	0.73	0.53	0.51	0.36	0.56	0.67	0.9	0.52	0.33	0.48	2.01	2.63	1.22	0.51	0.98	0.15	Magee1	melanoma antigen, family E, 1
107566	20.78	16.9	23.63	21.34	22.73	17.38	23.29	20.41	22.76	18.51	21.57	22.32	31.18	31.17	25.19	20.52	23.74	18.51	Arl2bp	ADP-ribosylation factor-like 2 binding protein
107568	53.77	63.33	59.99	72.54	75.57	63.7	64.02	63.88	40.13	41.23	62.95	50.55	35.47	19.67	42.44	67.78	62.19	77.91	Wwp1	WW domain-containing protein 1
107569	17.03	14.6	13.02	16.25	16.8	17.43	13.28	11.15	23.36	19.06	19.8	21.04	27.56	20.21	24.45	18.84	11.6	18.95	Nt5c3	5'-nucleotidase, cytosolic III,5'-nucleotidase, cytosolic III,
107581	2.28	2.09	2.78	1.81	2.25	2.15	3.21	2.84	2.38	3.5	0.75	2.75	9.04	11.73	5.03	1.22	2.8	1.65	Col16a1	procollagen, type XVI, alpha 1,procollagen, type XVI, alpha 1,
107585	0.07	0.23	0.1	0.28	0	0.25	0.15	0.33	0.23	0.32	0.06	0.16	1.96	10.27	1.65	0	0.15	0.28	Dio3	deiodinase, iodothyronine type III
107586	0	0	0	0	0	0	0	0	0	0	0	0	0	0.2	0	0	0	0	Ovol2	ovo-like 2 isoform A
[truncated: 15,611 more rows]

## Sheet: CELF2 heart
CELF2 induction in heart
[truncated: 16,200 more rows]
