# Supplementary material for: Antagonistic regulation of mRNA expression and splicing by CELF and MBNL proteins
Source: Genome Res. 2015 Jun;25(6):858–71. doi: 10.1101/gr.184390.114 (PMC4448682; doi:10.1101/gr.184390.114)
Supplement: Supplemental Material [file supp_gr.184390.114_Table_S7.xlsx]

## Sheet: CELF1 heart
Table S7. CELF1 and MBNL1 CLIP cluster locations within 3' UTRs.
#Gene	Symbol	Description	UTRexon	NumClusters	Coords
59025	Usp14	ubiquitin carboxyl-terminal hydrolase 14 isoform	chr18:9993613:9996094:-	5	9995990-9996083,9995504-9995564,9993729-9993822,9995747-9995834,9995628-9995738
24000	Ptpn21	SubName: Full=PTP-RL10b;	chr12:99914951:99916759:-	2	99915939-99916002,99915280-99915348
68904	Abhd13	abhydrolase domain-containing protein 13	chr8:9988418:9992154:+	4	9989045-9989108,9989900-9989975,9989466-9989526,9990153-9990216
207214	Larp4	la-related protein 4 isoform 2	chr15:99842605:99846789:+	10	99845994-99846039,99846545-99846662,99845137-99845175,99843088-99843154,99846397-99846441,99845497-99845578,99843801-99843842,99845905-99845965,99843476-99843522,99845179-99845293
66365	Ccdc90b	coiled-coil domain-containing protein 90B,	chr7:99730366:99730803:+	1	99730463-99730542
18484	Pam	peptidyl-glycine alpha-amidating monooxygenase	chr1:99717671:99718386:-	6	99718052-99718127,99718131-99718245,99718246-99718355,99717867-99717988,99717673-99717790,99718381-99718418
18679	Phka1	phosphorylase b kinase regulatory subunit alpha,	chrX:99709314:99711380:-	5	99711061-99711113,99710860-99710974,99709572-99709626,99710788-99710843,99710721-99710781
72157	Pgm2	phosphoglucomutase-1	chr4:99659369:99659899:+	1	99659503-99659606
320292	Rasgef1b	Mus musculus 10 days neonate skin cDNA, RIKEN full-length enriched library, clone:4732452O09 product:CDNA FLJ31695 FIS, CLONE NT2RI2005811, WEAKLY SIMILAR TO CELL DIVISION CONTROL PROTEIN 25 homolog [Homo sapiens], full insert sequence.	chr5:99646439:99647792:-	1	99646905-99646945
238799	Tnpo1	transportin-1 isoform 2	chr13:99612036:99614575:-	7	99613160-99613233,99613433-99613515,99613522-99613572,99613256-99613305,99612426-99612544,99612960-99613081,99613340-99613397
227399	Ppip5k2	SubName: Full=Putative uncharacterized protein;	chr1:99602623:99604294:-	2	99602784-99602849,99603046-99603108
66892	Eif4e3	eukaryotic translation initiation factor 4E type	chr6:99575131:99577000:-	2	99576383-99576442,99575968-99576071
71949	Lass5	LAG1 longevity assurance homolog 5	chr15:99566023:99566651:-	1	99566510-99566572
66379	2310016M24Rik	hypothetical protein LOC66379	chr15:99558257:99558567:+	2	99558352-99558422,99558288-99558337
14555	Gpd1	glycerol-3-phosphate dehydrogenase [NAD+],	chr15:99553718:99555438:+	2	99554360-99554418,99554506-99554568
83797	Smarcd1	SWI/SNF-related matrix-associated	chr15:99542856:99544426:+	4	99542981-99543085,99543447-99543506,99543694-99543764,99544090-99544183
14744	Gpr65	psychosine receptor	chr12:99514313:99514842:+	1	99514568-99514630
218503	Fcho2	FCH domain only protein 2	chr13:99493362:99495708:-	3	99493770-99493823,99494900-99494960,99493912-99493961
76789	2410129H14Rik	Mus musculus ES cells cDNA, RIKEN full-length enriched library, clone:2410129H14 product:unclassifiable, full insert sequence.	chr14:99433769:99435708:-	3	99433923-99433975,99435248-99435310,99433856-99433909
74125	Armc8	armadillo repeat-containing protein 8 isoform 1	chr9:99380514:99381162:-	4	99380769-99380811,99380821-99380883,99380910-99380987,99380543-99380605
110213	Tmbim6	bax inhibitor 1	chr15:99238929:99240471:+	4	99239475-99239578,99239585-99239639,99239072-99239184,99240173-99240231
22379	Fmnl3	formin-like protein 3	chr15:99147654:99148803:-	1	99147679-99147733
57376	Smarce1	SWI/SNF-related matrix-associated	chr11:99070364:99071382:-	1	99070927-99070986
68558	Ankra2	ankyrin repeat family A protein 2	chr13:99043388:99043868:+	1	99043614-99043677
70560	Wars2	tryptophanyl-tRNA synthetase, mitochondrial	chr3:99020830:99024126:+	1	99022788-99022843
105372	Utp15	U3 small nucleolar RNA-associated protein 15	chr13:99016800:99019083:-	5	99018730-99018783,99018311-99018347,99018403-99018523,99018584-99018663,99018839-99018900
74769	Pik3cb	phosphatidylinositol-4,5-bisphosphate 3-kinase	chr9:98938821:98940131:-	1	98939306-98939376
16010	Igfbp4	insulin-like growth factor-binding protein 4	chr11:98912893:98913957:+	1	98912965-98913086
108155	Ogt	SubName: Full=Ogt protein; SubName: Full=Putative uncharacterized protein;	chrX:98877669:98879688:+	7	98877713-98877785,98879349-98879402,98878869-98878950,98878126-98878162,98878231-98878320,98878767-98878833,98879166-98879207
270627	Taf1	transcription initiation factor TFIID subunit 1	chrX:98794864:98797128:+	3	98795313-98795358,98795478-98795526,98795670-98795709
192160	Casc3	protein CASC3	chr11:98693575:98695121:+	6	98694472-98694517,98693844-98693905,98694757-98694811,98695020-98695079,98693982-98694024,98694971-98695018
74026	Msl1	male-specific lethal 1 homolog	chr11:98666746:98669173:+	4	98668418-98668506,98668243-98668295,98668176-98668240,98666772-98666871
19082	Prkag1	5'-AMP-activated protein kinase subunit gamma-1	chr15:98643228:98643803:-	2	98643534-98643590,98643370-98643430
56364	Zmym3	zinc finger MYM-type protein 3 isoform 1	chrX:98599724:98600949:-	3	98599857-98599899,98600171-98600279,98599761-98599849
11842	Arf3	ADP-ribosylation factor 3	chr15:98568057:98570763:-	7	98569506-98569628,98568285-98568341,98570219-98570326,98568696-98568811,98568609-98568672,98569032-98569107,98570140-98570217
23989	Med24	RecName: Full=Mediator of RNA polymerase II transcription subunit 24; AltName: Full=Mediator complex subunit 24; AltName: Full=Thyroid hormone receptor-associated protein 4; AltName: Full=Thyroid hormone receptor-associated protein complex 100 kDa component; Short=Trap100; Short=mTRAP100;	chr11:98565905:98566213:-	1	98566049-98566095
22123	Psmd3	SubName: Full=Proteasome (Prosome, macropain) 26S subunit, non-ATPase, 3; SubName: Full=Proteasome (Prosome, macropain) 26S subunit, non-ATPase, 3, isoform CRA_b; SubName: Full=Putative uncharacterized protein;	chr11:98556914:98557292:+	1	98557202-98557245
67972	Atp2b1	plasma membrane calcium ATPase 1	chr10:98485753:98488775:+	5	98486198-98486251,98487348-98487442,98486401-98486445,98486727-98486778,98486970-98487024
54601	Foxo4	SubName: Full=Forkhead box O4;	chrX:98454861:98456211:+	1	98455024-98455082
11512	Adcy6	SubName: Full=MKIAA0422 protein; Flags: Fragment;	chr15:98420421:98422780:-	6	98421612-98421725,98421463-98421536,98422021-98422089,98421726-98421816,98422587-98422655,98421104-98421158
55988	Snx12	sorting nexin-12 isoform 2	chrX:98407300:98409100:-	7	98407405-98407450,98407709-98407820,98407473-98407547,98407911-98407967,98408540-98408624,98407978-98408032,98408467-98408535
14719	Got2	aspartate aminotransferase, mitochondrial	chr8:98388037:98389028:-	3	98388398-98388456,98388555-98388649,98388654-98388701
209361	Taf3	RecName: Full=Transcription initiation factor TFIID subunit 3; AltName: Full=140 kDa TATA box-binding protein-associated factor; AltName: Full=TBP-associated factor 3; AltName: Full=Transcription initiation factor TFIID 140 kDa subunit; Short=TAF(II)140; Short=TAF140; Short=TAFII-140; Short=TAFII140;	chr2:9837223:9837975:-	1	9837307-9837359
234595	Slc38a7	putative sodium-coupled neutral amino acid	chr8:98359823:98361468:-	2	98360775-98360814,98360839-98360902
71914	Antxr2	anthrax toxin receptor 2 precursor	chr5:98313707:98315580:-	6	98314419-98314473,98315239-98315307,98315124-98315187,98313835-98313902,98314242-98314285,98314653-98314708
74080	Nmnat3	Mus musculus adult male testis cDNA, RIKEN full-length enriched library, clone:4933408N02 product:unclassifiable, full insert sequence.	chr9:98310860:98311847:+	2	98311338-98311378,98311108-98311187
103742	1810046J19Rik	protein C17orf37 homolog	chr11:98299022:98299375:-	1	98299189-98299242
320655	Pgap3	post-GPI attachment to proteins factor 3	chr11:98249986:98251351:-	2	98250253-98250301,98251195-98251242
21393	Tcap	telethonin	chr11:98245859:98246267:+	1	98245764-98245879
234593	Ndrg4	protein NDRG4 isoform A	chr8:98237232:98238856:+	7	98238407-98238507,98238607-98238718,98237878-98237997,98237271-98237354,98237415-98237472,98238278-98238400,98238517-98238581
19049	Ppp1r1b	protein phosphatase 1 regulatory subunit 1B	chr11:98218384:98219109:+	3	98218910-98218959,98218507-98218553,98218976-98219011
13134	Dach1	dachshund homolog 1 isoform 1	chr14:98186066:98188800:-	1	98187861-98187915
114565	Zfp295	zinc finger protein 295 isoform 3	chr16:98168599:98171045:-	1	98170269-98170311
239652	Zfp641	zinc finger protein 641	chr15:98116553:98118902:-	1	98117912-98117963
69131	Cdk12	cell division protein kinase 12 isoform 3	chr11:98111703:98114854:+	3	98114016-98114065,98112398-98112500,98113964-98114012
19014	Med1	mediator of RNA polymerase II transcription	chr11:98014975:98016554:-	2	98015919-98015977,98016010-98016054
53310	Dlg3	disks large homolog 3 isoform 1	chrX:98011664:98013747:+	1	98012555-98012615
13000	Csnk2a2	casein kinase II subunit alpha'	chr8:97969996:97972318:-	1	97972021-97972059
17342	Mitf	SubName: Full=Microphthalmia-associated transcription factor B isoform; Flags: Fragment;	chr6:97968169:97971352:+	4	97969595-97969701,97968444-97968536,97970258-97970309,97968343-97968395
78541	Asb8	ankyrin repeat and SOCS box protein 8	chr15:97965071:97966236:-	4	97965579-97965630,97965202-97965310,97965357-97965479,97965094-97965161
18642	Pfkm	6-phosphofructokinase, muscle type	chr15:97962490:97962879:+	1	97962538-97962620
72194	Fbxl20	F-box/LRR-repeat protein 20	chr11:97943868:97950904:-	7	97950077-97950191,97946389-97946440,97946450-97946569,97950195-97950266,97946589-97946669,97944971-97945014,97944058-97944099
17388	Mmp15	matrix metalloproteinase-15 precursor	chr8:97896420:97898193:+	1	97897726-97897765
223870	Senp1	sentrin-specific protease 1	chr15:97871660:97873320:-	5	97871795-97871843,97871714-97871773,97872114-97872160,97872793-97872852,97872000-97872065
18027	Nfia	nuclear factor 1 A-type isoform 1	chr4:97777926:97785567:+	27	97780406-97780522,97780530-97780589,97779842-97779933,97778231-97778273,97782333-97782417,97778926-97778966,97779791-97779833,97785259-97785372,97781319-97781361,97779964-97780072,97783652-97783708,97780262-97780302,97782419-97782512,97782081-97782126,97780137-97780249,97779475-97779525,97782713-97782806,97782564-97782674,97783538-97783601,97783797-97783900,97780785-97780902,97784888-97784954,977…
20333	Sec22b	vesicle-trafficking protein SEC22b	chr3:97725193:97726241:+	7	97725531-97725591,97725876-97725955,97725216-97725266,97726124-97726175,97725627-97725745,97725369-97725484,97725143-97725214
16796	Lasp1	LIM and SH3 domain protein 1	chr11:97697559:97700078:+	1	97698539-97698583
56233	HDAC7	Mus musculus histone deacetylase 7 (HDAC7) mRNA, complete cds.	chr15:97623112:97624127:-	1	97623142-97623251
67480	Cwc25	pre-mRNA-splicing factor CWC25 homolog	chr11:97606929:97608668:-	1	97607763-97607835
233490	Crebzf	CREB/ATF bZIP transcription factor	chr7:97592601:97596229:+	2	97593888-97593948,97593799-97593858
108083	Pip4k2b	phosphatidylinositol-5-phosphate 4-kinase type-2	chr11:97576471:97580172:-	4	97579823-97579870,97577979-97578098,97578248-97578312,97578112-97578223
223864	Rapgef3	rap guanine nucleotide exchange factor 3 isoform	chr15:97575384:97575978:-	1	97575500-97575583
246198	Mllt6	myeloid/lymphoid or mixed lineage-leukemia	chr11:97542901:97546772:+	5	97544198-97544288,97543563-97543689,97544289-97544399,97545770-97545888,97545941-97545982
83679	Pde4dip	myomegalin isoform 4	chr3:97542767:97545193:-	1	97542806-97542864
14766	Gpr56	G-protein coupled receptor 56 precursor	chr8:97536887:97538091:+	3	97537089-97537140,97537383-97537459,97537236-97537283
108097	Prkab2	5'-AMP-activated protein kinase subunit beta-2	chr3:97473728:97476990:+	4	97475531-97475568,97475623-97475696,97474262-97474327,97474088-97474135
14263	Fmo5	dimethylaniline monooxygenase [N-oxide-forming]	chr3:97455750:97459210:+	1	97456029-97456088
68018	Col4a3bp	collagen type IV alpha-3-binding protein isoform	chr13:97407073:97410121:+	5	97407760-97407805,97407450-97407486,97408298-97408383,97408389-97408435,97407588-97407668
58996	Arhgap23	rho GTPase-activating protein 23	chr11:97362439:97363714:+	1	97362841-97362890
233489	mKIAA4114	Mus musculus mammary gland RCB-0526 Jyg-MC(A) cDNA, RIKEN full-length enriched library, clone:G830015A09 product:phosphatidylinositol binding clathrin assembly protein, full insert sequence.	chr7:97356107:97357442:+	2	97356388-97356449,97356092-97356133
109006	Ciapin1	anamorsin	chr8:97343719:97346996:-	5	97346375-97346475,97346476-97346588,97344327-97344384,97346760-97346831,97346019-97346111
20312	Cx3cl1	fractalkine precursor	chr8:97304456:97306326:+	1	97304849-97304900
192157	Socs7	suppressor of cytokine signaling 7	chr11:97254703:97259856:+	4	97258814-97258850,97258679-97258799,97257529-97257575,97257296-97257359
67698	Fam174a	membrane protein FAM174A precursor	chr1:97230516:97231861:+	3	97230658-97230757,97230775-97230847,97230848-97230915
107566	Arl2bp	ADP-ribosylation factor-like protein 2-binding	chr8:97197018:97198322:+	5	97197757-97197837,97197311-97197419,97197844-97197958,97197202-97197264,97197590-97197645
67036	Mrpl45	39S ribosomal protein L45, mitochondrial	chr11:97189882:97191234:+	1	97190868-97190907
67610	Rspry1	RING finger and SPRY domain-containing protein 1	chr8:97182700:97184176:+	1	97183979-97184033
65106	Arl6ip5	PRA1 family protein 3	chr6:97182566:97183309:+	5	97183012-97183080,97182752-97182850,97182584-97182648,97182853-97182898,97182910-97183011
70675	AK031819	Mus musculus 13 days embryo male testis cDNA, RIKEN full-length enriched library, clone:6030423O15 product:unclassifiable, full insert sequence.	chr1:9713278:9714562:-	6	9713594-9713642,9713333-9713381,9714386-9714447,9713890-9713948,9713655-9713732,9713432-9713543
22200	Uba3	NEDD8-activating enzyme E1 catalytic subunit	chr6:97133810:97134773:-	1	97134329-97134389
13626	Eed	polycomb protein EED	chr7:97103164:97103446:-	1	97103403-97103442
102122	Fam192a	NEFA-interacting nuclear protein NIP30	chr8:97098841:97099536:-	1	97099097-97099178
19155	Npepps	puromycin-sensitive aminopeptidase	chr11:97067171:97068429:-	4	97067800-97067886,97067729-97067764,97067349-97067387,97067398-97067463
16211	Kpnb1	importin subunit beta-1	chr11:97021024:97023994:-	2	97022235-97022285,97021779-97021857
13179	Dcn	decorin preproprotein	chr10:96980289:96980785:+	1	96980499-96980549
192287	AK035037	Mus musculus 12 days embryo embryonic body between diaphragm region and neck cDNA, RIKEN full-length enriched library, clone:9430077E01 product:inferred: Mus musculus, Similar to hypothetical protein FLJ10618, clone IMAGE:3594297, mRNA, partial cds, full insert sequence.	chr9:96977430:96979464:-	5	96978529-96978590,96977982-96978036,96978944-96978986,96978353-96978399,96977505-96977605
64209	Herpud1	homocysteine-responsive endoplasmic	chr8:96918655:96919258:+	3	96918806-96918926,96919091-96919171,96918927-96919044
107732	Mrpl10	39S ribosomal protein L10, mitochondrial	chr11:96909649:96910527:+	1	96909663-96909723
14613	Gja5	gap junction alpha-5 protein	chr3:96855628:96857557:+	3	96857332-96857389,96856638-96856681,96856966-96857072
66505	Zmynd11	zinc finger MYND domain-containing protein 11	chr13:9684082:9686107:-	6	9684140-9684243,9684354-9684455,9684283-9684344,9685101-9685205,9685938-9685979,9686041-9686099
78912	Sp2	transcription factor Sp2 isoform 1	chr11:96814652:96815783:-	1	96815598-96815633
103711	Pnpo	pyridoxine-5'-phosphate oxidase	chr11:96799130:96800228:-	3	96799367-96799437,96799467-96799561,96799199-96799256
235534	Acpl2	acid phosphatase-like protein 2 precursor	chr9:96723762:96725103:-	3	96724288-96724325,96723789-96723833,96724631-96724687
17748	Mt1	metallothionein-1	chr8:96704093:96704225:+	1	96704015-96704093
17750	Mt2	metallothionein-2	chr8:96697327:96697467:+	1	96697308-96697418
94061	Mrpl1	39S ribosomal protein L1, mitochondrial isoform	chr5:96693356:96695728:+	4	96694561-96694630,96694098-96694173,96694449-96694490,96694932-96694974
18023	Nfe2l1	nuclear factor erythroid 2-related factor 1	chr11:96678728:96680489:-	6	96679251-96679359,96680172-96680237,96678775-96678836,96678988-96679113,96679515-96679572,96679362-96679434
208440	Dip2c	disco-interacting protein 2 homolog C	chr13:9665276:9668171:+	8	9666430-9666495,9666499-9666572,9666648-9666729,9666249-9666292,9667226-9667289,9665674-9665738,9665581-9665643,9665819-9665901
18744	Pja1	E3 ubiquitin-protein ligase Praja-1 isoform 2	chrX:96661073:96661903:-	1	96661499-96661553
74479	Snx11	sorting nexin-11	chr11:96628863:96630359:-	1	96629293-96629332
67845	Rnf115	E3 ubiquitin-protein ligase RNF115	chr3:96593929:96595078:+	4	96594097-96594146,96594882-96594928,96594163-96594266,96594963-96595003
270086	mKIAA1612	Mus musculus adult male testis cDNA, RIKEN full-length enriched library, clone:4930415J21 product:similar to OVARC1001341 PROTEIN [Homo sapiens], full insert sequence.	chr8:96588240:96591822:+	7	96589207-96589287,96591099-96591169,96591761-96591815,96591432-96591471,96588500-96588552,96591642-96591692,96590770-96590811
67760	Slc38a2	sodium-coupled neutral amino acid transporter 2	chr15:96517823:96520557:-	8	96519122-96519171,96520272-96520378,96518237-96518282,96517892-96517967,96519681-96519743,96518785-96518861,96518885-96518954,96517848-96517891
231464	Cnot6l	CCR4-NOT transcription complex subunit 6-like	chr5:96504757:96506198:-	5	96506067-96506128,96506150-96506232,96506002-96506065,96505427-96505483,96504924-96505030
23802	Amfr	E3 ubiquitin-protein ligase AMFR	chr8:96495488:96497066:-	7	96496928-96497024,96496868-96496915,96495641-96495708,96496160-96496228,96495711-96495817,96495950-96496005,96496810-96496862
50795	Sh3bgr	SH3 domain-binding glutamic acid-rich protein	chr16:96450130:96450540:+	3	96450185-96450243,96450398-96450502,96450259-96450373
60365	Rbm8a	RNA-binding protein 8A isoform a	chr3:96435657:96437714:+	3	96436055-96436155,96436727-96436782,96435834-96435897
105727	Slc38a1	sodium-coupled neutral amino acid transporter 1	chr15:96405106:96407141:-	1	96405327-96405362
545554	Ankrd34a	ankyrin repeat domain 34	chr3:96402892:96403701:+	1	96403439-96403476
69870	Polr3gl	DNA-directed RNA polymerase III subunit	chr3:96381797:96382424:-	2	96382057-96382116,96382231-96382320
71446	Wrb	tryptophan-rich protein	chr16:96377559:96379459:+	5	96378750-96378813,96379275-96379329,96377943-96378003,96378274-96378312,96377618-96377702
19823	Rnf7	RING-box protein 2	chr9:96371376:96372152:-	2	96371852-96371917,96371605-96371685
14062	F2r	proteinase-activated receptor 1 precursor	chr13:96371744:96373687:-	1	96371783-96371880
56338	Txnip	thioredoxin-interacting protein isoform 1	chr3:96364452:96365780:+	5	96365072-96365191,96365192-96365253,96365542-96365667,96364808-96364926,96364706-96364800
15312	Hmgn1	non-histone chromosomal protein HMG-14	chr16:96343195:96343982:-	2	96343212-96343249,96343398-96343441
72759	Tmem135	transmembrane protein 135	chr7:96288231:96290347:-	3	96289752-96289789,96288968-96289038,96289866-96289903
93871	Brwd1	bromodomain and WD repeat-containing protein 1	chr16:96288275:96290069:-	11	96288791-96288845,96289065-96289188,96289450-96289542,96289207-96289274,96289011-96289062,96289968-96290027,96289558-96289618,96288508-96288544,96288358-96288481,96288886-96288978,96289398-96289433
236920	Stard8	stAR-related lipid transfer protein 8	chrX:96268539:96270067:+	1	96269674-96269713
72193	Scaf11	splicing factor, arginine/serine-rich 2,	chr15:96242129:96245218:-	5	96244566-96244632,96243110-96243167,96243168-96243229,96243549-96243587,96243896-96243944
11933	Atp1b3	sodium/potassium-transporting ATPase subunit	chr9:96233095:96233942:-	5	96233602-96233699,96233733-96233806,96233398-96233524,96233848-96233966,96233184-96233266
77044	Arid2	AT rich interactive domain 2 (ARID, RFX-like)	chr15:96232525:96235894:+	2	96233524-96233631,96233439-96233482
211586	Tfdp2	SubName: Full=Putative uncharacterized protein; Flags: Fragment;	chr9:96218390:96224065:+	14	96223724-96223788,96218964-96219009,96223851-96223903,96223217-96223307,96223425-96223549,96221463-96221549,96221037-96221139,96218889-96218960,96218415-96218522,96220234-96220269,96219014-96219080,96222403-96222452,96219204-96219267,96220872-96220907
77929	Yipf6	protein YIPF6	chrX:96140327:96144359:+	4	96142238-96142313,96140917-96140968,96140544-96140608,96142869-96142947
319190	Hist2h2be	histone H2B type 2-E	chr3:96025469:96027661:+	2	96027026-96027118,96026576-96026613
64051	Sv2a	synaptic vesicle glycoprotein 2A	chr3:95997839:95999103:+	2	95997955-95998011,95998588-95998631
229603	Otud7b	zinc finger, A20 domain containing 1	chr3:95959891:95965052:+	5	95962659-95962730,95961590-95961663,95964124-95964175,95962548-95962587,95961831-95961885
23872	Ets2	protein C-ets-2	chr16:95940745:95942654:+	5	95941960-95942023,95940910-95940972,95941112-95941171,95941401-95941456,95941672-95941711
268470	Ube2z	ubiquitin-conjugating enzyme E2 Z	chr11:95908750:95911557:-	4	95910571-95910689,95910517-95910565,95910002-95910062,95911095-95911208
218460	Wdr41	WD repeat-containing protein 41	chr13:95791780:95793269:+	1	95791870-95791979
66471	Anp32e	acidic leucine-rich nuclear phosphoprotein 32	chr3:95749173:95751308:+	8	95751038-95751143,95750207-95750270,95749304-95749371,95750377-95750454,95750472-95750576,95749192-95749298,95750696-95750781,95750577-95750630
66262	Ing5	inhibitor of growth protein 5	chr1:95714900:95718677:+	4	95717982-95718036,95716688-95716754,95715413-95715472,95716279-95716321
23831	Car14	carbonic anhydrase 14 precursor	chr3:95701723:95702068:-	1	95701741-95701821
77963	Hook1	SubName: Full=Hook homolog 1 (Drosophila); SubName: Full=Putative uncharacterized protein;	chr4:95689028:95690965:+	6	95690864-95690910,95689736-95689779,95689637-95689699,95690770-95690820,95689859-95689908,95690030-95690088
70767	Prpf3	U4/U6 small nuclear ribonucleoprotein Prp3	chr3:95634545:95634741:-	2	95634673-95634725,95634732-95634782
268469	Zfp652	zinc finger protein 652	chr11:95625373:95626027:+	2	95625764-95625808,95625822-95625869
75137	Rprd2	regulation of nuclear pre-mRNA domain-containing	chr3:95563796:95567602:-	2	95565148-95565267,95567436-95567475
16516	Kcnj15	ATP-sensitive inward rectifier potassium channel	chr16:95518336:95521865:+	1	95520443-95520544
216238	Eea1	Mus musculus adult male aorta and vein cDNA, RIKEN full-length enriched library, clone:A530029P08 product:similar to ENDOSOMAL PROTEIN [Homo sapiens], full insert sequence.	chr10:95504838:95508152:+	7	95505335-95505400,95505538-95505589,95507840-95507899,95505706-95505795,95507657-95507721,95506927-95507025,95506710-95506760
229595	Adamtsl4	ADAMTS-like protein 4 precursor	chr3:95480127:95480755:-	3	95480325-95480385,95480562-95480606,95480400-95480454
17210	Mcl1	induced myeloid leukemia cell differentiation	chr3:95464746:95467101:+	5	95466857-95466927,95465946-95466005,95465567-95465656,95466453-95466575,95465822-95465944
75552	Paqr9	progestin and adipoQ receptor family member 9	chr9:95461505:95462540:+	4	95461880-95461977,95462261-95462324,95461505-95461580,95461581-95461636
56205	Ensa	alpha-endosulfine isoform b	chr3:95432633:95434415:+	4	95433117-95433168,95432973-95433084,95434237-95434292,95433738-95433800
20917	Suclg2	succinyl-CoA ligase [GDP-forming] subunit beta,	chr6:95424128:95425042:-	3	95424296-95424355,95424423-95424482,95424590-95424633
18000	Sept2	septin-2 a	chr1:95404290:95406307:+	6	95404841-95404876,95404376-95404450,95404890-95404961,95404487-95404531,95404749-95404797,95405709-95405807
67958	2610101N10Rik	Mus musculus adult male testis cDNA, RIKEN full-length enriched library, clone:4931431N04 product:hypothetical Serine-rich region/RNA-binding region RNP-1 (RNA recognition motif)/Glutamic acid-rich region/SWAP / SURP containing protein, full insert sequence.	chr9:95357313:95361823:-	9	95359244-95359294,95358194-95358286,95361110-95361173,95361513-95361596,95357843-95357882,95357615-95357671,95361454-95361501,95361619-95361704,95359941-95360021
20747	Spop	speckle-type POZ protein	chr11:95353155:95354724:+	5	95353651-95353693,95354316-95354415,95354559-95354643,95354155-95354259,95354669-95354704
11774	Ap3b1	AP-3 complex subunit beta-1	chr13:95335713:95336271:+	1	95335827-95335905
110611	Hdlbp	vigilin	chr1:95302517:95304749:-	8	95304514-95304559,95304442-95304496,95304259-95304356,95302549-95302591,95302612-95302675,95304632-95304692,95303758-95303838,95303845-95303935
217127	Myst2	histone acetyltransferase MYST2 isoform 1	chr11:95135573:95137099:-	4	95136718-95136795,95135863-95135938,95135754-95135862,95136802-95136850
229589	Prune	protein prune homolog	chr3:95057596:95058917:-	2	95057834-95057938,95057939-95058038
56772	Mllt11	protein AF1q	chr3:95022466:95024106:-	1	95023120-95023170
71207	Nudt4	diphosphoinositol polyphosphate phosphohydrolase	chr10:95009641:95011921:-	8	95010340-95010447,95010187-95010252,95009971-95010031,95011354-95011457,95010709-95010823,95010574-95010615,95009664-95009763,95011234-95011353
93765	Ube2n	ubiquitin-conjugating enzyme E2 N	chr10:95004946:95008292:+	1	95005627-95005700
213054	Gabpb2	GA-binding protein subunit beta-2	chr3:94985690:94992591:-	1	94987648-94987707
107767	Scamp1	secretory carrier-associated membrane protein 1	chr13:94971388:94973953:-	4	94971995-94972040,94971454-94971569,94972211-94972298,94972939-94973063
320709	Tmem117	Mus musculus adult male diencephalon cDNA, RIKEN full-length enriched library, clone:9330142K14 product:weakly similar to KIAA1657 PROTEIN (FRAGMENT) [Homo sapiens], full insert sequence.	chr15:94925436:94926528:+	2	94925599-94925682,94925692-94925729
13548	Dyrk1a	dual specificity	chr16:94913808:94917126:+	9	94914999-94915040,94916239-94916296,94914051-94914095,94915109-94915170,94914896-94914997,94915832-94915915,94915962-94916056,94914256-94914322,94916112-94916171
18604	Pdk2	pyruvate dehydrogenase kinase, isoenzyme 2	chr11:94887573:94888495:-	6	94888144-94888265,94888019-94888139,94887775-94887893,94887899-94887962,94888277-94888401,94887646-94887772
217124	Ppp1r9b	neurabin-2	chr11:94866672:94868197:+	2	94867109-94867149,94867936-94867986
18720	Pip5k1a	Mus musculus 13 days embryo heart cDNA, RIKEN full-length enriched library, clone:D330025G18 product:inferred: phosphatidylinositol-4-phosphate 5-kinase, type 1 beta / Similar to phosphatidylinositol-4-phosphate 5-kinase, type 1 beta [Mus musculus], full insert sequence.	chr3:94863520:94864004:-	1	94863700-94863739
78808	Stxbp5	RecName: Full=Syntaxin-binding protein 5; AltName: Full=Lethal(2) giant larvae protein homolog 3; AltName: Full=Tomosyn-1;	chr10:9475345:9480710:-	3	9478244-9478282,9479884-9479928,9477557-9477635
53970	Rfx5	SubName: Full=Rfx5 protein;	chr3:94763290:94765483:+	1	94764945-94765006
14733	Gpc1	glypican-1 precursor	chr1:94755141:94756773:+	3	94755598-94755645,94756449-94756558,94755311-94755371
13185	Dscr3	Down syndrome critical region protein 3	chr16:94719331:94720606:-	1	94719721-94719767
16476	Jun	transcription factor AP-1	chr4:94715727:94716957:-	1	94716304-94716405
22129	Ttc3	SubName: Full=Putative uncharacterized protein;	chr16:94689607:94690828:+	4	94690508-94690626,94690274-94690393,94690413-94690469,94690627-94690704
229584	Pogz	Mus musculus adult male urinary bladder cDNA, RIKEN full-length enriched library, clone:9530006B08 product:hypothetical Zinc finger, C2H2 type containing protein, full insert sequence.	chr3:94684254:94684729:+	1	94684392-94684429
320713	Mysm1	histone H2A deubiquitinase MYSM1	chr4:94608732:94613655:-	4	94613256-94613315,94609603-94609642,94612502-94612565,94611632-94611697
170765	Ripply3	protein ripply3	chr16:94557547:94558542:+	1	94557763-94557824
21687	Tek	angiopoietin-1 receptor	chr4:94540689:94541630:+	2	94541589-94541625,94541530-94541574
68861	1190002N15Rik	Golgi protein GoPro49	chr9:94418283:94420733:-	3	94419546-94419599,94418368-94418411,94419356-94419481
264895	Acsf2	acyl-CoA synthetase family member 2,	chr11:94418416:94419620:-	4	94418959-94419015,94419047-94419122,94419216-94419295,94418483-94418543
170753	Zfp704	zinc finger protein 704	chr3:9427010:9438786:-	6	9436262-9436300,9427796-9427848,9427976-9428027,9427607-9427665,9438311-9438374,9432048-9432102
110948	Hlcs	biotin--protein ligase	chr16:94350912:94353399:-	1	94352405-94352451
76742	Snx27	sorting nexin-27 isoform 2	chr3:94301466:94305978:-	8	94305398-94305454,94305303-94305344,94303231-94303267,94302398-94302442,94302444-94302493,94305708-94305816,94302680-94302735,94305088-94305133
12291	Cacna1g	SubName: Full=Putative uncharacterized protein; Flags: Fragment;	chr11:94269705:94270458:-	1	94270048-94270103
11800	AK078801	Mus musculus 16 days embryo lung cDNA, RIKEN full-length enriched library, clone:8430401M20 product:apoptosis inhibitory protein 5, full insert sequence.	chr2:94251884:94253915:-	2	94251924-94251978,94252519-94252568
18786	Plaa	phospholipase A-2-activating protein	chr4:94231830:94236037:-	2	94234619-94234664,94235956-94236013
57748	Jmy	junction-mediating and -regulatory protein	chr13:94204157:94205374:-	3	94204168-94204284,94204301-94204412,94204627-94204706
26383	Fto	alpha-ketoglutarate-dependent dioxygenase FTO	chr8:94190334:94192332:+	11	94191748-94191813,94190878-94190929,94192058-94192182,94192185-94192303,94191294-94191370,94191877-94191917,94191928-94191974,94190569-94190631,94191434-94191509,94190458-94190568,94191513-94191567
26556	Homer1	homer protein homolog 1 isoform S	chr13:94172184:94174917:+	2	94173761-94173845,94172201-94172261
67770	5830433M19Rik	hypothetical protein LOC67770	chr4:94166772:94167715:-	1	94167227-94167264
74569	AK136355	Mus musculus 15 days embryo embryonic body between diaphragm and neck cDNA, RIKEN full-length enriched library, clone:8130402C08 product:unclassifiable, full insert sequence.	chr2:94140923:94141892:-	2	94141097-94141189,94141513-94141568
319880	Tmcc3	transmembrane and coiled-coil domains protein 3	chr10:94049775:94053699:+	10	94051036-94051074,94050194-94050281,94050933-94050978,94052343-94052411,94052928-94052972,94049944-94049982,94052676-94052752,94050690-94050735,94053308-94053383,94051874-94051946
70834	JSAP2	Mus musculus mRNA for JSAP2a, complete cds.	chr11:93984151:93987396:+	10	93985624-93985677,93984945-93985013,93987152-93987217,93985065-93985159,93986530-93986583,93987326-93987371,93985940-93986052,93986085-93986174,93987224-93987272,93986182-93986260
56348	Hsd17b12	estradiol 17-beta-dehydrogenase 12	chr2:93872854:93873713:-	3	93873222-93873336,93873103-93873180,93873606-93873674
208727	Hdac4	histone deacetylase 4	chr1:93829332:93829923:-	1	93829865-93829912
18102	Nme1	nucleoside diphosphate kinase A	chr11:93820239:93820709:-	2	93820506-93820541,93820315-93820374
103537	Mbtd1	MBT domain-containing protein 1	chr11:93805207:93808298:+	1	93807448-93807498
65973	Asph	aspartyl/asparaginyl beta-hydroxylase isoform 1	chr4:9376232:9380441:-	4	9379498-9379559,9377375-9377433,9379787-9379843,9379996-9380071
14339	Aktip	AKT-interacting protein	chr8:93647398:93648469:-	3	93648161-93648217,93648261-93648313,93648052-93648137
19651	Rbl2	SubName: Full=Putative uncharacterized protein; Flags: Fragment;	chr8:93646345:93647743:+	2	93647088-93647148,93647005-93647062
12453	Ccni	cyclin-I	chr5:93610959:93612002:-	3	93611544-93611650,93611022-93611080,93611162-93611265
13998	Fgd6	FYVE, RhoGEF and PH domain-containing protein 6	chr10:93604534:93608084:+	3	93606048-93606105,93607194-93607249,93604741-93604800
52398	Sept11	septin-11	chr5:93600380:93603984:+	10	93600694-93600750,93600914-93600954,93600542-93600600,93600408-93600497,93602792-93602835,93603405-93603442,93602090-93602190,93601725-93601763,93602909-93602945,93600619-93600690
109151	Chd9	Mus musculus adult male colon cDNA, RIKEN full-length enriched library, clone:9030205D12 product:unclassifiable, full insert sequence.	chr8:93575871:93578407:+	2	93576769-93576804,93577617-93577683
218442	Serinc5	serine incorporator 5	chr13:93478092:93481901:+	5	93478891-93478974,93478639-93478698,93480268-93480316,93478979-93479040,93481786-93481844
65247	Asb1	ankyrin repeat and SOCS box protein 1 isoform a	chr1:93451455:93456167:+	6	93455268-93455385,93452686-93452735,93453552-93453601,93455406-93455453,93452903-93452960,93451873-93451972
17698	Msn	Mus musculus 13 days embryo forelimb cDNA, RIKEN full-length enriched library, clone:5930420P08 product:moesin, full insert sequence.	chrX:93361973:93363892:+	9	93362764-93362823,93362051-93362106,93362131-93362216,93362557-93362633,93363000-93363052,93362241-93362340,93362342-93362435,93363124-93363238,93362469-93362527
106042	Prickle1	prickle-like protein 1	chr15:93329545:93330877:-	4	93330193-93330234,93330432-93330490,93330351-93330410,93330494-93330542
56307	Metap2	methionine aminopeptidase 2	chr10:93321235:93324094:-	6	93323943-93324029,93324033-93324084,93322396-93322443,93323847-93323915,93323710-93323775,93321984-93322043
223828	Pphln1	periphilin-1 isoform 1	chr15:93319599:93322343:+	7	93321411-93321470,93319753-93319790,93321252-93321304,93320186-93320231,93319950-93320012,93321332-93321380,93320428-93320474
18627	Per2	period circadian protein homolog 2	chr1:93312559:93314447:-	2	93312699-93312736,93313412-93313473
67444	Ilkap	RecName: Full=Integrin-linked kinase-associated serine/threonine phosphatase 2C; Short=ILKAP; EC=3.1.3.16;	chr1:93272408:93272518:-	1	93272440-93272480
70788	Klhl30	kelch-like protein 30	chr1:93257843:93258981:+	2	93258333-93258384,93257880-93257936
67974	Ccny	cyclin-Y	chr18:9314042:9316553:-	7	9314410-9314469,9316030-9316117,9314138-9314197,9314999-9315068,9315666-9315722,9314325-9314386,9315170-9315229
223827	Gxylt1	glucoside xylosyltransferase 1	chr15:93070173:93075560:-	2	93074757-93074794,93074671-93074736
20338	Sel1l	protein sel-1 homolog 1 isoform b	chr12:93044483:93048283:-	8	93045921-93045992,93047719-93047757,93045692-93045782,93046003-93046121,93046558-93046642,93047162-93047221,93046873-93046915,93046712-93046800
52331	Stbd1	Mus musculus adult male tongue cDNA, RIKEN full-length enriched library, clone:2310031C01 product:unclassifiable, full insert sequence.	chr5:93034695:93035605:+	1	93034877-93034919
12492	Scarb2	lysosome membrane protein 2	chr5:92872899:92873271:-	3	92872973-92873088,92872897-92872972,92873196-92873258
108800	Ston2	stonin-2	chr12:92871450:92878161:-	3	92872169-92872238,92871618-92871661,92875786-92875833
83602	Gtf2a1	transcription initiation factor IIA subunit 1	chr12:92793703:92798183:-	9	92795943-92796000,92795466-92795527,92795323-92795371,92797239-92797308,92796903-92796949,92796557-92796612,92795401-92795450,92794867-92794986,92796815-92796872
231452	Sdad1	protein SDA1 homolog	chr5:92713036:92715848:-	2	92714105-92714159,92713401-92713440
13713	Elk3	Mus musculus 13 days embryo lung cDNA, RIKEN full-length enriched library, clone:D430049E23 product:ETS-DOMAIN PROTEIN ELK-3 (ETS-RELATED PROTEIN NET) (ETS-RELATED PROTEIN ERP), full insert sequence.	chr10:92710161:92712754:-	3	92712409-92712488,92712582-92712627,92712675-92712717
237459	Cdk17	cell division protein kinase 17	chr10:92702370:92704087:+	4	92702608-92702671,92702725-92702798,92703758-92703800,92702800-92702889
67111	NAAA	Mus musculus NAAA mRNA for N-acylethanolamine-hydrolyzing acid amidase, complete cds.	chr5:92686686:92687969:-	2	92686700-92686776,92686922-92686958
108679	Cops8	COP9 signalosome complex subunit 8	chr1:92508828:92509916:+	1	92509028-92509075
26432	Plod2	procollagen-lysine,2-oxoglutarate 5-dioxygenase	chr9:92502068:92503258:+	2	92502213-92502259,92502060-92502108
23881	G3bp2	ras GTPase-activating protein-binding protein 2	chr5:92481172:92483806:-	4	92482918-92482965,92481837-92481884,92481893-92481994,92482679-92482738
76969	DQ561039	DQ561039	chr2:92454577:92455409:+	1	92455257-92455306
53886	Cdkl2	cyclin-dependent kinase-like 2 isoform 1	chr5:92435101:92437106:-	4	92436052-92436111,92435286-92435325,92435703-92435738,92436503-92436564
54720	Rcan1	calcipressin-1 isoform 2	chr16:92392198:92393697:-	6	92393116-92393220,92392897-92392962,92392695-92392742,92392785-92392892,92392596-92392692,92392987-92393089
67117	Dynlt3	dynein light chain Tctex-type 3	chrX:9231396:9233112:-	3	9233077-9233132,9231595-9231640,9231535-9231590
243548	Prickle2	prickle-like protein 2 isoform b	chr6:92320886:92325939:-	1	92325357-92325397
228368	Slc35c1	GDP-fucose transporter 1 isoform 1	chr2:92292922:92294371:-	1	92292987-92293097
12953	Cry2	cryptochrome-2	chr2:92243804:92245977:-	5	92244698-92244755,92244570-92244631,92245370-92245406,92244329-92244370,92244650-92244694
236915	Arhgef9	rho guanine nucleotide exchange factor 9	chrX:92244283:92247311:-	3	92244657-92244706,92246557-92246610,92246446-92246481
192285	Phf21a	PHD finger protein 21A isoform 2	chr2:92200580:92204823:+	5	92200875-92200937,92204671-92204758,92201660-92201733,92204001-92204062,92201753-92201811
17997	Nedd1	protein NEDD1	chr10:92147490:92148935:-	2	92148808-92148867,92147919-92147961
53881	Slc5a3	sodium/myo-inositol cotransporter	chr16:92079458:92087718:+	4	92086770-92086808,92084481-92084533,92082095-92082133,92081738-92081799
668166	Zxdb	zinc finger X-linked protein ZXDA/ZXDB	chrX:91972635:91975530:+	3	91974789-91974851,91974707-91974750,91975189-91975227
69085	Zcchc9	Mus musculus 9.5 days embryo parthenogenote cDNA, RIKEN full-length enriched library, clone:B130002F16 product:hypothetical CCHC type Zn-finger containing protein, full insert sequence.	chr13:91936138:91936740:-	2	91936533-91936572,91936425-91936523
16443	Itsn1	intersectin-1 isoform 3	chr16:91912254:91920824:+	1	91912661-91912697
66970	Ssbp2	SubName: Full=Putative uncharacterized protein;	chr13:91840300:91845780:+	6	91842405-91842460,91841512-91841619,91840512-91840572,91843734-91843789,91844056-91844098,91845179-91845226
347722	Agap1	arf-GAP with GTPase, ANK repeat and PH	chr1:91785469:91791857:+	4	91790835-91790878,91786200-91786239,91787465-91787509,91791578-91791664
65098	Zfand6	AN1-type zinc finger protein 6	chr7:91763564:91764329:-	4	91763723-91763838,91764020-91764066,91763849-91763889,91763586-91763693
217980	Larp4b	la-related protein 4B	chr13:9170188:9172336:+	7	9171726-9171810,9170679-9170739,9171518-9171578,9171916-9171986,9171031-9171117,9170234-9170288,9170938-9171028
21366	Slc6a6	sodium- and chloride-dependent taurine	chr6:91705051:91709057:+	7	91708195-91708292,91706735-91706782,91706784-91706862,91705079-91705196,91707097-91707208,91705197-91705297,91706611-91706734
77975	Tmem50b	transmembrane protein 50B	chr16:91574753:91576357:-	10	91576060-91576129,91576193-91576293,91575662-91575711,91574853-91574914,91575451-91575545,91575351-91575439,91575575-91575632,91576137-91576172,91575016-91575097,91575126-91575191
15980	Ifngr2	interferon gamma receptor 2	chr16:91563250:91564252:+	5	91563633-91563686,91563777-91563818,91563474-91563559,91563821-91563867,91563979-91564094
51897	Atg13	autophagy-related protein 13	chr2:91514782:91516542:-	3	91515735-91515771,91515486-91515547,91516246-91516292
75786	mKIAA0097	Mus musculus 13 days embryo head cDNA, RIKEN full-length enriched library, clone:3110043H24 product:hypothetical ARM repeat structure containing protein, full insert sequence.	chr2:91460381:91460822:+	1	91460469-91460507
16155	Il10rb	interleukin-10 receptor subunit beta	chr16:91425368:91426078:+	1	91425908-91425979
72170	Chchd4	mitochondrial intermembrane space import and	chr6:91414270:91415008:-	1	91414486-91414541
22764	Zfx	zinc finger X-chromosomal protein	chrX:91319970:91324134:-	8	91320183-91320232,91321463-91321527,91320419-91320485,91322360-91322417,91323936-91323996,91323351-91323401,91323057-91323111,91321711-91321763
74256	Cyld	ubiquitin carboxyl-terminal hydrolase CYLD	chr8:91270912:91275844:+	3	91271415-91271491,91272170-91272287,91271278-91271319
70178	Fam108c	abhydrolase domain-containing protein FAM108C1	chr7:91257866:91259091:-	6	91257893-91257955,91258321-91258378,91258041-91258077,91258772-91258855,91258652-91258736,91258398-91258472
77038	Arfgap2	ADP-ribosylation factor GTPase-activating	chr2:91115942:91117088:+	1	91116011-91116085
80708	Pacsin3	protein kinase C and casein kinase II substrate	chr2:91104463:91104836:+	2	91104441-91104481,91104537-91104622
66795	Atg10	ubiquitin-like-conjugating enzyme ATG10	chr13:91074954:91075850:-	2	91075532-91075580,91075310-91075363
228355	mKIAA0358	Mus musculus mRNA for mKIAA0358 protein.	chr2:90977517:90978558:-	3	90978267-90978334,90978182-90978226,90978110-90978172
17868	Mybpc3	Mus musculus myosin binding protein-C (Mybpc3) mRNA, complete cds.	chr2:90976400:90976673:+	1	90976439-90976526
19400	Rapsn	43 kDa receptor-associated protein of the	chr2:90885675:90885886:+	1	90885807-90885844
13046	Celf1	CUGBP Elav-like family member 1 isoform 2	chr2:90856723:90857210:+	3	90856864-90856965,90856721-90856841,90857024-90857150
16564	Kif21a	Mus musculus Kif21a (Kif21a) mRNA, complete cds.	chr15:90763707:90764880:-	3	90763967-90764057,90764212-90764255,90763734-90763770
67136	Kbtbd4	kelch repeat and BTB domain-containing protein	chr2:90750034:90750717:+	2	90750036-90750137,90750161-90750213
67988	Tmx3	protein disulfide-isomerase TMX3 precursor	chr18:90709588:90712659:+	3	90711429-90711496,90710721-90710794,90711001-90711057
56428	Mtch2	Mus musculus domesticus mitochondrial carrier homolog 2 mRNA, complete cds; nuclear gene for mitochondrial product.	chr2:90705427:90706791:+	2	90705536-90705589,90706166-90706225
81702	Ankrd17	ankyrin repeat domain-containing protein 17	chr5:90656191:90658306:-	2	90658004-90658059,90657194-90657270
55935	Fnbp4	formin-binding protein 4	chr2:90619808:90621177:+	1	90619993-90620079
21917	Tmpo	Mus musculus 10 days embryo whole body cDNA, RIKEN full-length enriched library, clone:2610305J08 product:thymopoietin, full insert sequence.	chr10:90610316:90612220:-	3	90610396-90610452,90610501-90610537,90611272-90611352
71699	Slc41a3	solute carrier family 41 member 3 isoform 1	chr6:90595775:90596406:+	1	90595966-90596038
320982	Arl4c	ADP-ribosylation factor-like protein 4C	chr1:90594803:90597660:-	1	90595125-90595173
18674	Slc25a3	phosphate carrier protein, mitochondrial	chr10:90579323:90579708:-	2	90579651-90579714,90579346-90579399
59015	Gtl-13	Mus musculus gene trap locus-13 (Gtl-13) mRNA, complete cds.	chr2:90575661:90576485:+	1	90575808-90575861
67454	Ikbip	inhibitor of nuclear factor kappa-B	chr10:90559362:90561403:+	1	90559744-90559795
18968	Pola1	DNA polymerase alpha catalytic subunit	chrX:90550106:90551009:-	1	90550861-90550908
11783	Apaf1	apoptotic protease-activating factor 1	chr10:90452056:90454194:-	1	90453541-90453612
68646	1110020G09Rik	hypothetical protein LOC68646 isoform 2	chr15:9038114:9040244:+	4	9038552-9038614,9038417-9038477,9039686-9039722,9038649-9038707
67860	S100a16	S100 calcium binding protein A16	chr3:90346508:90347073:+	2	90346893-90346928,90346744-90346852
66871	Cpne8	copine-8 isoform 1	chr15:90317912:90319417:-	1	90318324-90318370
20193	S100a1	protein S100-A1	chr3:90314956:90315142:-	1	90314992-90315105
66511	2500003M10Rik	Friend of PRMT1 protein	chr3:90302880:90303823:-	2	90303535-90303600,90303626-90303689
19271	Ptprj	receptor-type tyrosine-protein phosphatase eta	chr2:90273047:90276566:-	1	90275430-90275486
66074	Tmem167	protein kish-A precursor	chr13:90244050:90254526:+	1	90244695-90244761
217082	Hlf	hepatic leukemia factor	chr11:90197849:90202072:-	12	90201539-90201608,90200041-90200122,90201632-90201721,90199916-90200037,90200998-90201067,90200614-90200672,90201807-90201929,90201729-90201770,90201296-90201339,90200686-90200766,90198061-90198132,90200378-90200434
229543	Ints3	integrator complex subunit 3	chr3:90195310:90195949:-	1	90195619-90195661
380959	Alg10b	RecName: Full=Putative alpha-1,2-glucosyltransferase ALG10-B; EC=2.4.1.-; AltName: Full=Alpha-2-glucosyltransferase ALG10-B; AltName: Full=Asparagine-linked glycosylation protein 10 homolog B;	chr15:90058810:90060985:+	5	90058764-90058825,90060317-90060428,90058960-90059039,90060431-90060541,90059909-90059996
30791	Slc39a1	zinc transporter ZIP1	chr3:90056264:90057534:+	1	90056784-90056845
21761	Morf4l1	mortality factor 4-like protein 1 isoform b	chr9:89986507:89987155:-	1	89987133-89987190
68263	Pdhb	pyruvate dehydrogenase E1 component subunit	chr14:8998505:8998849:-	2	8998671-8998784,8998548-8998670
14376	Ganab	Mus musculus 10 days neonate skin cDNA, RIKEN full-length enriched library, clone:4732427L16 product:alpha glucosidase 2, alpha neutral subunit, full insert sequence.	chr19:8990224:8991155:+	3	8990310-8990358,8990359-8990475,8990214-8990268
227334	Usp40	ubiquitin carboxyl-terminal hydrolase 40 isoform	chr1:89841696:89843170:-	1	89841759-89841831
21844	Tiam1	T-lymphoma invasion and metastasis-inducing	chr16:89787356:89789366:-	2	89788721-89788764,89787627-89787702
72113	Adck1	aarF domain containing kinase 1 precursor	chr12:89699636:89700162:+	1	89699603-89699666
77040	Atg16l1	autophagy-related protein 16-1 beta isoform	chr1:89687884:89688997:+	3	89688670-89688735,89688228-89688267,89688421-89688491
54403	Slc4a4	electrogenic sodium bicarbonate cotransporter 1	chr5:89664532:89668681:+	10	89666170-89666234,89665786-89665857,89664593-89664677,89666684-89666725,89667659-89667733,89664687-89664744,89664906-89664952,89665607-89665701,89666319-89666378,89665702-89665765
74114	Crot	SubName: Full=Putative uncharacterized protein;	chr5:8966048:8966851:-	1	8966498-8966588
214547	She	SH2 domain-containing adapter protein E	chr3:89658636:89662767:+	2	89662112-89662162,89659709-89659758
140493	Kcnn3	small conductance calcium-activated potassium	chr3:89471303:89476416:+	2	89472947-89472999,89473016-89473052
17775	Laptm4a	lysosomal-associated transmembrane protein 4A	chr12:8944997:8945547:+	5	8945321-8945404,8945031-8945135,8945201-8945320,8944922-8945030,8945153-8945196
58234	Shank3	SH3 and multiple ankyrin repeat domains protein	chr15:89388754:89390689:+	1	89389627-89389683
21985	Tpd52	tumor protein D52 isoform 1	chr3:8929436:8931051:-	1	8929984-8930021
18844	Plxna1	plexin-A1 precursor	chr6:89266310:89269369:-	1	89267206-89267268
229534	Pbxip1	pre-B-cell leukemia transcription	chr3:89252688:89254874:+	4	89252771-89252827,89254072-89254134,89253017-89253080,89253305-89253344
12895	Cpt1b	carnitine O-palmitoyltransferase 1, muscle	chr15:89246836:89247326:-	1	89246971-89247063
68911	Pygo2	pygopus homolog 2	chr3:89237436:89239050:+	2	89237931-89237972,89237606-89237665
67053	Rpp14	ribonuclease P protein subunit p14	chr14:8922478:8924359:+	4	8922955-8923019,8923837-8923878,8922885-8922952,8923748-8923805
319945	Flad1	FAD synthase	chr3:89206595:89207087:-	2	89207022-89207073,89206967-89207005
98363	Efhd1	EF-hand domain-containing protein D1	chr1:89206370:89207366:+	1	89206526-89206565
68473	Mobkl1a	Mus musculus 18-day embryo whole body cDNA, RIKEN full-length enriched library, clone:1110003E08 product:weakly similar to CELL CYCLE ASSOCIATED PROTEIN MOB1-1 [Trypanosoma brucei], full insert sequence.	chr5:89185197:89187480:+	3	89187364-89187467,89185220-89185317,89185719-89185784
22724	Zbtb7b	zinc finger and BTB domain-containing protein	chr3:89181568:89183447:-	1	89183170-89183247
26987	Eif4e2	eukaryotic translation initiation factor 4E type	chr1:89134460:89137063:+	6	89134898-89134960,89135373-89135415,89136225-89136287,89136100-89136224,89134457-89134520,89135987-89136052
231413	Grsf1	G-rich sequence factor 1 isoform 2	chr5:89088262:89089484:-	2	89088572-89088654,89088914-89089011
68693	Hnrnpul2	heterogeneous nuclear ribonucleoprotein U-like	chr19:8906025:8908632:+	6	8907923-8907965,8906545-8906599,8907067-8907187,8907566-8907635,8908280-8908358,8906985-8907035
54607	Cis4	Mus musculus cytokine inducible SH2-containing protein CIS4 (Cis4) mRNA, complete cds.	chr18:89037272:89038579:-	3	89038410-89038492,89037730-89037801,89037932-89037999
29877	Hdgfrp3	hepatoma-derived growth factor-related protein	chr7:89026142:89030963:-	4	89030817-89030867,89029156-89029194,89030653-89030735,89029967-89030045
15574	Hus1	RecName: Full=Checkpoint protein HUS1; Short=mHUS1;	chr11:8893145:8896852:-	2	8896431-8896498,8894106-8894149
83962	Btbd1	BTB/POZ domain-containing protein 1	chr7:88936960:88938453:-	1	88938236-88938307
67148	Fam103a1	hypothetical protein LOC67148	chr7:88913444:88914376:+	1	88914187-88914234
56077	Dgke	diacylglycerol kinase epsilon	chr11:88898896:88902045:-	5	88899524-88899605,88901867-88901915,88901437-88901490,88901502-88901538,88898977-88899014
14236	Foxn2	forkhead box N2	chr17:88886266:88889873:+	1	88889154-88889209
72296	Rusc1	SubName: Full=Putative uncharacterized protein;	chr3:88887901:88888403:-	1	88888019-88888076
22439	Xk	membrane transport protein XK	chrX:8886875:8890371:+	2	8888645-8888695,8888553-8888593
192195	Ash1l	probable histone-lysine N-methyltransferase	chr3:88881004:88883297:+	3	88881772-88881833,88881846-88881896,88882163-88882271
217069	Trim25	E3 ubiquitin/ISG15 ligase TRIM25	chr11:88878035:88881607:+	2	88881096-88881162,88878765-88878820
70387	Ttc9c	tetratricopeptide repeat protein 9C	chr19:8883565:8886233:-	2	8883743-8883812,8884395-8884460
66902	Mtap	S-methyl-5'-thioadenosine phosphorylase	chr4:88825410:88826994:+	3	88826844-88826884,88825862-88825898,88826446-88826490
211064	Alkbh1	alkylated DNA repair protein alkB homolog 1	chr12:88769028:88769790:-	1	88769505-88769543
26557	Homer2	homer protein homolog 2 isoform 3	chr7:88745368:88755138:-	21	88754924-88755035,88754269-88754389,88754737-88754776,88745395-88745509,88748631-88748687,88754673-88754734,88747875-88747979,88755044-88755144,88749952-88750027,88749823-88749893,88746459-88746513,88746629-88746686,88745930-88745975,88748706-88748757,88749751-88749817,88746694-88746795,88750222-88750284,88750822-88750910,88748804-88748845,88750678-88750737,88746200-88746239
65111	Dap3	28S ribosomal protein S29, mitochondrial isoform	chr3:88724725:88727749:-	1	88727565-88727600
223775	Pim3	serine/threonine-protein kinase pim-3	chr15:88695192:88696156:+	1	88695819-88695885
11640	Akap1	A-kinase anchor protein 1, mitochondrial	chr11:88692106:88693068:-	4	88692476-88692528,88692412-88692475,88692532-88692587,88692904-88692958
244091	Fsd2	fibronectin type III and SPRY domain-containing	chr7:88679240:88679881:-	2	88679695-88679750,88679818-88679855
67710	Polr2g	DNA-directed RNA polymerase II subunit RPB7	chr19:8867619:8867880:-	1	8867626-8867680
102093	Phkb	Mus musculus B6-derived CD11 +ve dendritic cells cDNA, RIKEN full-length enriched library, clone:F730039M10 product:similar to phosphorylase kinase (EC 2.7.1.38) beta chain [Homo sapiens], full insert sequence.	chr8:88583341:88584541:+	3	88583852-88583894,88583358-88583394,88583414-88583499
229521	Syt11	synaptotagmin-11	chr3:88548623:88551621:-	2	88549473-88549543,88549562-88549622
19769	Rit1	GTP-binding protein Rit1 isoform 1	chr3:88533264:88534970:+	3	88533509-88533613,88534346-88534404,88533370-88533492
223770	mKIAA4191	Mus musculus 18-day embryo whole body cDNA, RIKEN full-length enriched library, clone:1110059H06 product:unclassifiable, full insert sequence.	chr15:88517465:88518726:-	2	88517763-88517839,88517896-88517947
382620	Tmed8	protein TMED8	chr12:88507192:88513363:-	4	88511281-88511323,88511949-88511989,88512171-88512220,88509723-88509765
207615	Wdr37	WD repeat-containing protein 37 isoform a	chr13:8849725:8852798:-	2	8850983-8851039,8851115-8851175
12877	Cpeb1	cytoplasmic polyadenylation element-binding	chr7:88492329:88493226:-	3	88492383-88492428,88492516-88492551,88493018-88493080
19231	Ptma	prothymosin alpha	chr1:88426587:88427273:+	1	88427174-88427212
225055	Fbxo11	SubName: Full=Putative uncharacterized protein; Flags: Fragment;	chr17:88390199:88391385:-	2	88390340-88390406,88390772-88390858
242521	Klhl9	kelch-like protein 9	chr4:88364196:88366052:-	4	88364223-88364335,88365113-88365183,88365898-88365959,88365611-88365677
56403	Syncrip	heterogeneous nuclear ribonucleoprotein Q	chr9:88344576:88349091:-	9	88344693-88344739,88347178-88347216,88348235-88348321,88344608-88344654,88348386-88348464,88346091-88346148,88347955-88347998,88347225-88347292,88344794-88344834
217732	Kiaa1737	RecName: Full=Uncharacterized protein KIAA1737;	chr12:88303617:88304755:+	2	88303860-88303915,88303794-88303846
56389	Stx5a	syntaxin-5	chr19:8829558:8830132:+	1	8829522-8829570
16905	Lmna	prelamin-A/C isoform A	chr3:88285071:88285995:-	1	88285621-88285665
116904	Alpk3	alpha-protein kinase 3	chr7:88249202:88250498:+	6	88250381-88250444,88249602-88249657,88250276-88250379,88249805-88249922,88249709-88249784,88249923-88250016
17975	Ncl	nucleolin	chr1:88241294:88247194:-	6	88243849-88243919,88243935-88243991,88245874-88245959,88242487-88242549,88243384-88243441,88246150-88246210
71927	Itfg1	T-cell immunomodulatory protein precursor	chr8:88242439:88242766:-	1	88242453-88242571
238330	6430527G18Rik	enhanced at puberty protein 1	chr12:88221653:88222519:-	3	88221932-88221992,88222090-88222141,88221812-88221898
229517	Slc25a44	solute carrier family 25 member 44 isoform b	chr3:88214420:88216819:-	2	88214718-88214837,88215231-88215273
233410	Zfp592	zinc finger protein 592	chr7:88186749:88187581:+	2	88187472-88187527,88186818-88186866
76626	msi2	Mus musculus msi2 mRNA for RNA-binding protein Musashi2-S, complete cds.	chr11:88152884:88158162:-	22	88154873-88154976,88157659-88157766,88152909-88152974,88156489-88156555,88158075-88158153,88154309-88154387,88155891-88155959,88157474-88157599,88156610-88156679,88157824-88157883,88153891-88153965,88155569-88155692,88157384-88157458,88156202-88156258,88157075-88157179,88155104-88155163,88155695-88155762,88154656-88154713,88157884-88157965,88157231-88157290,88154172-88154228,88154518-88154637
56445	Dnaja2	dnaJ homolog subfamily A member 2	chr8:88061539:88063114:-	6	88062973-88063063,88062892-88062963,88062824-88062891,88062721-88062823,88062540-88062598,88062629-88062687
56529	Sec11a	signal peptidase complex catalytic subunit	chr7:88060265:88060739:-	2	88060478-88060551,88060710-88060787
103963	Rpn1	dolichyl-diphosphooligosaccharide--protein	chr6:88053541:88055298:+	1	88053797-88053848
108682	Gpt2	alanine aminotransferase 2	chr8:88049525:88051457:+	2	88049623-88049681,88049683-88049762
64656	Mrps23	28S ribosomal protein S23, mitochondrial	chr11:88024265:88025009:+	1	88024631-88024691
20969	Sdc1	syndecan-1 precursor	chr12:8798613:8800493:+	1	8799295-8799354
17261	Mef2d	myocyte-specific enhancer factor 2D	chr3:87972565:87973089:+	2	87972797-87972908,87972635-87972708
212862	Chpt1	cholinephosphotransferase 1 isoform 1	chr10:87936222:87938149:-	5	87937551-87937603,87936744-87936802,87936474-87936519,87937026-87937130,87937613-87937705
66714	4921524J17Rik	hypothetical protein LOC66714	chr8:87932658:87933670:-	1	87933600-87933653
22344	Vezf1	vascular endothelial zinc finger 1	chr11:87895327:87898231:+	7	87896358-87896456,87896220-87896316,87898013-87898124,87897138-87897208,87895434-87895519,87896542-87896614,87897213-87897291
110809	Srsf1	serine/arginine-rich splicing factor 1 isoform	chr11:87862771:87867259:+	2	87863229-87863284,87863331-87863454
29875	Iqgap1	ras GTPase-activating-like protein IQGAP1	chr7:87856469:87858717:-	2	87858443-87858488,87856592-87856644
12314	Calm2	calmodulin	chr17:87832741:87833366:-	4	87833100-87833184,87833257-87833311,87832968-87833031,87832882-87832930
17254	Slc3a2	Mus musculus mRNA for 4F2 heavy chain, complete cds.	chr19:8781372:8782212:-	2	8782140-8782243,8782063-8782101
64294	Itm2c	integral membrane protein 2C	chr1:87804213:87805273:+	2	87804292-87804350,87804900-87804937
68097	Gdi-1	Mus musculus Gdi-1 mRNA for RhoGDI-1, complete cds.	chr11:87793035:87794934:-	9	87793983-87794098,87794232-87794354,87794359-87794440,87793068-87793193,87794634-87794757,87793778-87793881,87793246-87793369,87793882-87793982,87794100-87794226
12785	Cnbp	cellular nucleic acid-binding protein isoform 1	chr6:87792609:87794032:-	3	87793764-87793878,87793699-87793762,87793146-87793209
65114	Vps35	vacuolar protein sorting-associated protein 35	chr8:87784291:87785028:-	5	87784584-87784619,87784623-87784726,87784296-87784352,87784801-87784857,87784876-87784919
225049	Ttc7	tetratricopeptide repeat protein 7A	chr17:87779410:87781098:+	2	87780393-87780441,87780452-87780513
12283	Cab39	Mus musculus lung RCB-0558 LLC cDNA, RIKEN full-length enriched library, clone:G730021G09 product:calcium binding protein 39, full insert sequence.	chr1:87745796:87748152:+	6	87746540-87746605,87745919-87745958,87746869-87746955,87747468-87747530,87747102-87747163,87747174-87747223
12013	Bach1	transcription regulator protein BACH1	chr16:87730116:87733591:+	3	87730183-87730227,87732097-87732143,87732233-87732287
15191	Hdgf	hepatoma-derived growth factor	chr3:87718830:87720054:+	2	87719659-87719746,87719887-87719999
193813	Mcfd2	multiple coagulation factor deficiency protein 2	chr17:87653783:87655265:-	3	87654602-87654658,87654540-87654597,87655227-87655307
70373	1700020O03Rik	hypothetical protein LOC70373	chr12:87629925:87632318:+	5	87630064-87630142,87630144-87630242,87629915-87629980,87630724-87630824,87630266-87630304
20684	Sp100	nuclear autoantigen Sp-100	chr1:87605693:87606023:+	1	87605740-87605795
212999	Tnpo2	transportin-2	chr8:87579450:87581481:+	1	87581285-87581327
80913	Pum2	pumilio homolog 2 isoform 2	chr12:8756526:8759387:+	9	8757648-8757722,8759016-8759135,8757380-8757422,8757880-8757941,8758705-8758779,8758288-8758352,8758813-8758916,8757527-8757646,8758356-8758426
213498	Arhgef11	SubName: Full=Putative uncharacterized protein Arhgef11;	chr3:87541024:87541955:+	4	87541093-87541133,87541419-87541511,87541226-87541284,87541141-87541218
56468	Socs5	suppressor of cytokine signaling 5	chr17:87534584:87536925:+	6	87535875-87535978,87535631-87535750,87535444-87535484,87535984-87536025,87536433-87536499,87535543-87535616
18550	Furin	furin preproprotein	chr7:87534080:87535592:-	1	87534271-87534308
12469	Cct8	T-complex protein 1 subunit theta	chr16:87483570:87484232:-	1	87484120-87484221
69724	Rnaseh2a	ribonuclease H2 subunit A	chr8:87480509:87481621:-	1	87480682-87480728
56724	Cript	cysteine-rich PDZ-binding protein	chr17:87434382:87435150:+	1	87434471-87434509
170749	Mtmr4	myotubularin-related protein 4	chr11:87427755:87429798:+	3	87428658-87428729,87428228-87428313,87429075-87429154
70122	Mllt3	Mus musculus AF9 mRNA, partial cds.	chr4:87415829:87419918:-	4	87418828-87418889,87419101-87419137,87418691-87418748,87418596-87418645
104215	Rhoq	rho-related GTP-binding protein RhoQ precursor	chr17:87396400:87399409:+	9	87398317-87398365,87398219-87398314,87398100-87398217,87396782-87396867,87398684-87398748,87397341-87397420,87397873-87397981,87397516-87397634,87398008-87398082
16000	Igf1	insulin-like growth factor I isoform 2	chr10:87393445:87399792:+	1	87397542-87397603
78913	Rnf160	SubName: Full=Rnf160 protein;	chr16:87376896:87379189:-	1	87377856-87377905
12317	Calr	calreticulin precursor	chr8:87365987:87366545:-	1	87366232-87366348
27049	Etv3	SubName: Full=Putative uncharacterized protein Etv3;	chr3:87340574:87344078:+	1	87341584-87341673
23863	Dand5	DAN domain family member 5 precursor	chr8:87339304:87340186:-	1	87339907-87339955
231386	Ythdc1	YTH domain containing 1	chr5:87264933:87265682:+	1	87265200-87265308
18032	Nfix	nuclear factor 1 X-type isoform 3	chr8:87231498:87232576:-	4	87231501-87231550,87232038-87232098,87231944-87231989,87231817-87231885
13819	Epas1	endothelial PAS domain-containing protein 1	chr17:87230442:87232750:+	8	87230627-87230703,87230439-87230543,87231461-87231519,87231693-87231792,87231288-87231339,87232491-87232611,87231626-87231682,87231867-87231920
66830	Nacc1	Mus musculus adult male small intestine cDNA, RIKEN full-length enriched library, clone:2010001H03 product:RIKEN cDNA 2010001H03 gene, full insert sequence.	chr8:87194378:87196940:-	4	87195626-87195678,87195391-87195439,87196501-87196578,87196819-87196861
58520	0610007P14Rik	probable ergosterol biosynthetic protein 28	chr12:87156405:87157063:-	1	87156656-87156729
70420	2610034B18Rik	hypothetical protein LOC70420	chr7:87070245:87071727:-	2	87070822-87070874,87071191-87071254
320472	Ppm1e	protein phosphatase 1E	chr11:87040408:87044381:-	2	87042152-87042198,87042319-87042381
14583	Gfpt1	SubName: Full=Putative uncharacterized protein Gfpt1;	chr6:87038152:87042201:+	8	87039389-87039457,87038680-87038790,87038890-87038973,87038580-87038664,87041808-87041874,87039786-87039852,87039675-87039785,87042026-87042074
68729	Trim37	E3 ubiquitin-protein ligase TRIM37	chr11:87031836:87034184:+	4	87032738-87032824,87033895-87033945,87033584-87033620,87033743-87033780
11778	Ap3s2	AP-3 complex subunit sigma-2	chr7:87020211:87025369:-	7	87022726-87022790,87023918-87023981,87021247-87021325,87022989-87023075,87024271-87024320,87024820-87024864,87023285-87023338
269774	Aak1	AP2 associated kinase 1 isoform 2	chr6:86937292:86953221:+	13	86951521-86951601,86950657-86950781,86953082-86953126,86947722-86947766,86952072-86952107,86950913-86951008,86952217-86952267,86952396-86952466,86951422-86951485,86951686-86951737,86949679-86949732,86950784-86950842,86947167-86947206
66140	Fam33a	spindle and kinetochore-associated protein 2	chr11:86935501:86936476:+	5	86936397-86936449,86935984-86936065,86936093-86936174,86936340-86936375,86935827-86935864
252870	Hausp	Mus musculus herpesvirus-associated ubiquitin-specific protease (Hausp) mRNA, complete cds.	chr16:8688815:8690872:-	5	8690282-8690347,8690350-8690399,8690407-8690474,8689821-8689914,8689747-8689818
66569	Gdpd1	glycerophosphodiester phosphodiesterase	chr11:86847296:86848674:-	1	86848078-86848135
101966	D8Ertd738e	Mus musculus CRL-1722 L5178Y-R cDNA, RIKEN full-length enriched library, clone:I730026J21 product:Leydig cell tumor 10 kDa protein homolog [Rattus norvegicus], full insert sequence.	chr8:86770238:86770451:-	1	86770246-86770309
77864	Ypel2	protein yippee-like 2	chr11:86749927:86754100:-	3	86750100-86750223,86750785-86750842,86753840-86753927
212168	Zswim4	zinc finger SWIM domain-containing protein 4	chr8:86734841:86735844:-	2	86735078-86735173,86735420-86735472
11746	Anxa4	annexin A4	chr6:86686834:86687757:-	1	86687581-86687647
68581	Tmed10	transmembrane emp24 domain-containing protein 10	chr12:86681564:86684377:-	7	86683195-86683295,86681595-86681677,86683499-86683588,86682042-86682103,86683061-86683126,86682934-86683060,86683593-86683717
20616	mKIAA0656	Mus musculus mRNA for mKIAA0656 protein.	chr9:86659239:86660641:-	4	86659771-86659813,86659664-86659716,86659825-86659879,86659508-86659578
217718	Nek9	serine/threonine-protein kinase Nek9	chr12:86640464:86642753:-	7	86642693-86642734,86641286-86641352,86640587-86640646,86641738-86641857,86642499-86642584,86640464-86640583,86641973-86642093
23885	Gmcl1	germ cell-less protein-like 1	chr6:86641762:86642916:-	4	86642547-86642592,86642443-86642519,86642160-86642223,86641885-86641954
66618	Snrnp27	U4/U6.U5 small nuclear ribonucleoprotein 27 kDa	chr6:86625163:86625519:-	1	86625266-86625374
19724	Rfx1	SubName: Full=Putative uncharacterized protein;	chr8:86619865:86620891:+	2	86620519-86620566,86620626-86620706
17119	Mxd1	max dimerization protein 1	chr6:86597039:86600864:-	3	86600081-86600120,86597664-86597703,86597746-86597860
80877	Lrba	lipopolysaccharide-responsive and beige-like	chr3:86585583:86586616:+	1	86586119-86586166
67487	Dhx40	probable ATP-dependent RNA helicase DHX40	chr11:86582351:86583623:-	2	86582826-86582881,86582918-86582969
217716	Mlh3	DNA mismatch repair protein Mlh3	chr12:86575470:86576571:-	1	86576130-86576172
231380	AK017645	Mus musculus 8 days embryo whole body cDNA, RIKEN full-length enriched library, clone:5730448D02 product:unclassifiable, full insert sequence.	chr5:86539754:86541674:-	1	86539860-86539922
666704	Samd1	atherin	chr8:86523774:86524285:+	1	86524069-86524152
18747	Prkaca	cAMP-dependent protein kinase catalytic subunit	chr8:86519316:86520344:+	2	86519936-86520051,86520052-86520174
67300	AK049578	Mus musculus 7 days embryo whole body cDNA, RIKEN full-length enriched library, clone:C430045L21 product:CLATHRIN HEAVY CHAIN 1 (CLH-17) homolog [Homo sapiens], full insert sequence.	chr11:86508155:86509067:-	7	86508601-86508646,86508757-86508818,86508248-86508374,86508182-86508229,86508375-86508468,86508667-86508737,86508887-86508967
54608	Abhd2	abhydrolase domain-containing protein 2	chr7:86505042:86506487:+	2	86506326-86506381,86505196-86505257
17436	Me1	NADP-dependent malic enzyme isoform 2	chr9:86474970:86476343:-	8	86475008-86475089,86475092-86475134,86475173-86475275,86475857-86475928,86475608-86475720,86475438-86475503,86475721-86475843,86476138-86476180
23983	Pcbp1	poly(rC)-binding protein 1	chr6:86474491:86474838:-	2	86474709-86474754,86474577-86474641
78920	Dlst	dihydrolipoyllysine-residue succinyltransferase	chr12:86473703:86475041:+	6	86474270-86474338,86473829-86473910,86473926-86473985,86474110-86474170,86474423-86474469,86474882-86474937
330814	Lphn1	latrophilin-1 precursor	chr8:86462985:86465853:+	1	86465585-86465622
232196	C87436	hypothetical protein LOC232196	chr6:86419948:86420379:+	1	86420106-86420142
75909	Tmem49	transmembrane protein 49	chr11:86397367:86398809:-	1	86398717-86398754
66690	Tmem186	transmembrane protein 186	chr16:8633824:8635837:-	3	8634164-8634221,8634534-8634595,8634739-8634779
72508	AK165329	Mus musculus 6 days neonate spleen cDNA, RIKEN full-length enriched library, clone:F430010B03 product:hypothetical protein, full insert sequence.	chr11:86312513:86316226:-	3	86313983-86314027,86313870-86313930,86314662-86314737
11520	Plin2	perilipin-2	chr4:86302469:86302936:-	2	86302871-86302942,86302627-86302673
103466	Nt5dc3	5'-nucleotidase domain-containing protein 3	chr10:86296928:86301134:+	15	86300861-86300973,86300551-86300615,86299466-86299572,86300162-86300218,86297599-86297646,86300426-86300548,86298013-86298084,86300039-86300099,86297893-86297954,86299929-86300021,86298214-86298329,86297759-86297815,86298355-86298439,86299573-86299642,86300333-86300388
68497	1110018G07Rik	hypothetical protein LOC68497	chr12:86259099:86261427:-	4	86259402-86259440,86261258-86261333,86259671-86259717,86261386-86261454
68441	Rraga	ras-related GTP-binding protein A	chr4:86222764:86223185:+	1	86222840-86222913
268860	Abat	Mus musculus 16 days neonate cerebellum cDNA, RIKEN full-length enriched library, clone:9630038C02 product:BETA-ALANINE OXOGLUTARATE AMINOTRANSFERASE (EC 2.6.1.19) homolog [Rattus norvegicus], full insert sequence.	chr16:8618719:8621660:+	3	8619354-8619410,8619797-8619852,8619286-8619348
13642	Efnb2	ephrin-B2 precursor	chr8:8617439:8620587:-	2	8618098-8618147,8618485-8618534
81489	Dnajb1	dnaJ homolog subfamily B member 1	chr8:86134718:86135801:+	3	86134965-86135061,86135070-86135176,86135349-86135419
67963	Npc2	epididymal secretory protein E1 precursor	chr12:86095509:86098075:-	4	86097374-86097446,86095971-86096009,86097307-86097364,86097465-86097520
106529	Tecr	SubName: Full=Putative uncharacterized protein;	chr8:86095599:86095706:-	1	86095612-86095690
327987	Med13	mediator of RNA polymerase II transcription	chr11:86079217:86084487:-	4	86081206-86081256,86083828-86083895,86081468-86081533,86083121-86083214
76375	Det1	DET1 homolog	chr7:85972360:85972808:-	1	85972632-85972670
223753	Cerk	ceramide kinase	chr15:85969559:85971987:-	1	85969755-85969794
56367	Scoc	short coiled-coil protein isoform b	chr8:85958392:85959796:-	1	85958492-85958537
72102	Dusp11	RNA/RNP complex-1-interacting phosphatase	chr6:85892265:85897598:-	4	85897255-85897313,85895402-85895469,85897401-85897448,85892294-85892354
23794	Adamts5	A disintegrin and metalloproteinase with	chr16:85858402:85862854:-	2	85861711-85861776,85862006-85862050
244548	Elmod2	ELMO domain-containing protein 2	chr8:85836531:85840214:-	6	85839688-85839746,85838421-85838489,85839437-85839510,85838854-85838899,85836929-85836989,85839330-85839378
21859	Timp3	Mus musculus brain cDNA, clone MNCb-5810, similar to Mus musculus tissue inhibitor of metalloproteinase 3 (Timp3), mRNA.	chr10:85808647:85812250:+	7	85810391-85810476,85812032-85812142,85811071-85811153,85811655-85811695,85809682-85809747,85809793-85809886,85811471-85811534
104776	Aldh6a1	methylmalonate-semialdehyde dehydrogenase	chr12:85771668:85773393:-	7	85773063-85773188,85772861-85772974,85773001-85773054,85771720-85771792,85772790-85772857,85772231-85772353,85772360-85772468
12499	Entpd5	ectonucleoside triphosphate diphosphohydrolase 5	chr12:85714807:85718243:-	12	85717487-85717602,85714848-85714905,85716946-85717069,85715473-85715540,85715556-85715597,85715368-85715425,85716597-85716642,85717112-85717226,85717634-85717707,85716661-85716769,85717227-85717339,85715949-85716071
77219	Ptgr2	prostaglandin reductase 2	chr12:85654963:85656782:+	6	85655595-85655680,85655534-85655592,85655363-85655486,85655926-85655986,85655137-85655188,85654922-85654997
192197	Bcas3	breast carcinoma-amplified sequence 3 homolog	chr11:85638852:85639553:+	1	85638940-85638991
19013	Ppara	peroxisome proliferator-activated receptor	chr15:85631688:85637281:+	6	85635705-85635754,85635617-85635690,85633368-85633481,85634641-85634705,85632782-85632880,85636228-85636301
108837	mKIAA1417	Mus musculus adult male thymus cDNA, RIKEN full-length enriched library, clone:5830448N01 product:hypothetical Regulator of chromosome condensation, RCC1/Ankyrin/BTB/POZ containing protein, full insert sequence.	chr9:85580963:85581989:-	4	85581476-85581573,85581235-85581294,85581375-85581429,85581112-85581162
105000	Dnalc1	dynein light chain 1, axonemal	chr12:85479344:85484460:+	5	85482303-85482356,85482747-85482795,85481306-85481379,85479321-85479362,85479546-85479594
229488	Fam160a1	hypothetical protein LOC229488	chr3:85463985:85464886:-	2	85464319-85464365,85464606-85464660
213760	Prepl	prolyl endopeptidase-like isoform b	chr17:85462819:85463983:-	4	85463602-85463653,85463485-85463538,85463738-85463858,85463363-85463481
19043	Ppm1b	protein phosphatase 1B isoform 3	chr17:85414787:85416468:+	2	85415345-85415388,85415185-85415241
218397	Rasa1	RAS p21 protein activator 1	chr13:85354304:85355708:-	3	85354884-85354919,85355509-85355555,85354711-85354749
66671	Ccnh	SubName: Full=Putative uncharacterized protein;	chr13:85352383:85353328:+	1	85352614-85352665
59021	Rab2a	ras-related protein Rab-2A	chr4:8533650:8534849:+	7	8533661-8533698,8534661-8534727,8533950-8534009,8533837-8533930,8534530-8534653,8534341-8534449,8534271-8534325
54138	Atxn10	ataxin-10	chr15:85293353:85294266:+	1	85293495-85293618
52055	Rab11fip5	rab11 family-interacting protein 5 isoform 1	chr6:85284956:85287016:-	9	85286567-85286621,85285745-85285814,85285619-85285739,85285000-85285075,85286946-85287033,85285101-85285155,85286175-85286276,85285160-85285226,85286450-85286549
72416	Lrpprc	leucine-rich PPR motif-containing protein,	chr17:85104587:85104755:-	2	85104704-85104777,85104605-85104694
109672	Cyb5	cytochrome b5	chr18:85048976:85049255:+	1	85049063-85049163
11852	Rhob	rho-related GTP-binding protein RhoB precursor	chr12:8504565:8505847:-	5	8504736-8504800,8504641-8504727,8505519-8505584,8504920-8505022,8505050-8505110
11820	App	amyloid beta A4 protein isoform 1 precursor	chr16:84954688:84955575:-	4	84955403-84955452,84955187-84955249,84954933-84955035,84955124-84955163
14390	Gabpa	GA-binding protein alpha chain	chr16:84860848:84864023:+	2	84862886-84862926,84863165-84863203
237898	Usp32	ubiquitin specific protease 32	chr11:84797990:84799911:-	6	84798995-84799045,84798136-84798190,84799702-84799738,84798515-84798553,84799272-84799318,84798575-84798632
223739	5031439G07Rik	hypothetical protein LOC223739	chr15:84776150:84779667:-	3	84776867-84776927,84776743-84776841,84776939-84777015
14897	Trip12	thyroid hormone receptor interactor 12	chr1:84717764:84721192:-	9	84719630-84719689,84720152-84720262,84720358-84720451,84720838-84720896,84718216-84718262,84721072-84721122,84720904-84720955,84720082-84720149,84719986-84720042
30059	Timm10	mitochondrial import inner membrane translocase	chr2:84670148:84670370:+	2	84670285-84670338,84670187-84670259
56791	Ube2l6	ubiquitin/ISG15-conjugating enzyme E2 L6	chr2:84649313:84650158:+	1	84649425-84649511
217038	Mrm1	rRNA methyltransferase 1, mitochondrial	chr11:84626563:84627933:-	2	84626888-84626934,84626975-84627029
12952	Cry1	cryptochrome-1	chr10:84594445:84595052:-	1	84594493-84594544
103266	AI597468	hypothetical protein LOC103266	chr10:84577439:84580492:+	2	84580113-84580174,84578822-84578932
228136	Zdhhc5	probable palmitoyltransferase ZDHHC5	chr2:84528077:84529435:-	1	84529402-84529446
381379	Med19	mediator of RNA polymerase II transcription	chr2:84527091:84528371:+	1	84527317-84527368
232174	Cyp26b1	cytochrome P450, family 26, subfamily b,	chr6:84521938:84524260:-	1	84521996-84522064
237422	Ric8b	synembryn-B isoform 2	chr10:84477932:84479192:+	1	84478754-84478790
12388	Ctnnd1	catenin delta-1 isoform 3	chr2:84440938:84443048:-	6	84442039-84442125,84441106-84441164,84441954-84441999,84442887-84442946,84441841-84441893,84442775-84442825
70097	Sash1	SAM and SH3 domain-containing protein 1	chr10:8442017:8445294:-	4	8442162-8442207,8442621-8442678,8442876-8442919,8443846-8443897
223732	Ldoc1l	protein LDOC1L	chr15:84383828:84386891:-	1	84386654-84386750
99889	Arfip1	arfaptin-1	chr3:84299986:84301657:-	3	84301124-84301164,84300375-84300466,84300102-84300180
225791	Zadh2	zinc-binding alcohol dehydrogenase	chr18:84264726:84266906:+	6	84265950-84266022,84266382-84266457,84265514-84265574,84265726-84265828,84265282-84265352,84265628-84265689
110796	Tshz1	teashirt homolog 1	chr18:84181019:84182418:-	2	84182115-84182160,84181342-84181386
170736	Parvb	beta-parvin	chr15:84143461:84146039:+	6	84143950-84144021,84143873-84143917,84145754-84145792,84144693-84144761,84143540-84143602,84144090-84144132
216198	Tcp11l2	T-complex protein 11-like protein 2	chr10:84076471:84077100:+	2	84076574-84076625,84076686-84076786
98496	Pid1	PTB-containing, cubilin and LRP1-interacting	chr1:84032876:84034605:-	1	84033154-84033197
216197	Ckap4	cytoskeleton-associated protein 4	chr10:83989050:83990214:-	3	83989193-83989285,83989352-83989400,83989710-83989750
78798	Eml4	echinoderm microtubule-associated protein-like 4	chr17:83877507:83879699:+	1	83878586-83878624
75296	Fgfr1op	FGFR1 oncogene partner isoform 1	chr17:8387460:8389333:+	2	8387755-8387813,8387963-8388008
77976	Nuak1	NUAK family SNF1-like kinase 1	chr10:83834064:83836990:-	4	83836484-83836526,83834908-83834970,83835839-83835885,83834341-83834441
17260	Mef2c	myocyte-specific enhancer factor 2C isoform 2	chr13:83802236:83802948:+	1	83802252-83802351
232164	Paip2b	polyadenylate-binding protein-interacting	chr6:83756053:83758829:-	6	83757595-83757652,83757910-83757974,83757660-83757781,83757783-83757832,83756931-83756989,83756733-83756775
243078	Tecrl	trans-2,3-enoyl-CoA reductase-like	chr5:83707147:83708238:-	1	83707787-83707843
16410	Itgav	SubName: Full=Integrin alpha V; Flags: Fragment;	chr2:83643492:83647073:+	4	83643829-83643893,83646240-83646320,83643666-83643775,83646083-83646125
70527	Stambp	STAM-binding protein	chr6:83493200:83493973:-	1	83493577-83493657
58240	Hs1bp3	HCLS1-binding protein 3	chr12:8348893:8350630:+	2	8349089-8349144,8349963-8350009
27369	Dguok	deoxyguanosine kinase, mitochondrial isoform 1	chr6:83430208:83430426:-	1	83430261-83430323
319939	Tns3	tensin-3	chr11:8331655:8334496:-	6	8331712-8331748,8334131-8334171,8332686-8332728,8332616-8332676,8334409-8334444,8332806-8332922
232157	Mobkl1b	mps one binder kinase activator-like 1B	chr6:83290247:83290943:+	1	83290421-83290531
14388	Gab1	GRB2-associated-binding protein 1	chr8:83288333:83290227:-	10	83288458-83288568,83288569-83288614,83288758-83288819,83288836-83288939,83288636-83288757,83289047-83289100,83289425-83289493,83289190-83289245,83289310-83289376,83288944-83289042
276952	Rasl10b	Mus musculus adult male corpora quadrigemina cDNA, RIKEN full-length enriched library, clone:B230331P10 product:RAS-LIKE PROTEIN/VTS58635 homolog [Homo sapiens], full insert sequence.	chr11:83232332:83234540:+	4	83232662-83232780,83233175-83233235,83233099-83233167,83232787-83232876
93762	Smarca5	SWI/SNF-related matrix-associated	chr8:83223843:83224961:-	2	83223900-83223954,83224363-83224441
71770	Ap2b1	AP-2 complex subunit beta isoform b	chr11:83216146:83218535:+	1	83216187-83216247
23970	Pacsin2	protein kinase C and casein kinase substrate in	chr15:83206037:83208047:-	4	83206758-83206804,83207445-83207535,83206919-83206984,83206694-83206753
54604	Pcnx	pecanex-like protein 1	chr12:83097149:83101911:+	8	83099109-83099169,83098995-83099055,83100454-83100501,83097782-83097828,83098548-83098599,83098070-83098143,83098312-83098354,83098686-83098732
216190	Appl2	DCC-interacting protein 13-beta	chr10:83062779:83063651:-	1	83063397-83063436
319277	A230046K03Rik	WASH complex subunit 7	chr10:83056983:83059218:+	3	83057252-83057322,83057165-83057220,83057926-83057965
73826	Poldip3	polymerase delta-interacting protein 3	chr15:82956408:82958310:-	6	82956708-82956770,82958036-82958142,82956609-82956683,82956487-82956539,82957526-82957573,82956425-82956480
14933	Gyk	glycerol kinase isoform 2	chrX:82947276:82949724:-	3	82949072-82949178,82949387-82949451,82948214-82948262
15463	Agfg1	arf-GAP domain and FG repeats-containing protein	chr1:82891633:82892850:+	6	82892596-82892631,82891670-82891722,82892249-82892294,82891750-82891825,82892695-82892738,82891961-82892005
66724	Tab3	TGF-beta-activated kinase 1 and MAP3K7-binding	chrX:82875893:82879653:+	5	82876387-82876440,82877810-82877881,82878516-82878570,82876476-82876535,82878588-82878679
69863	Ttc39b	tetratricopeptide repeat protein 39B	chr4:82866205:82873037:-	11	82871980-82872057,82868612-82868692,82866855-82866943,82871571-82871615,82866619-82866665,82870494-82870539,82867156-82867223,82872072-82872113,82866953-82867025,82866496-82866583,82869773-82869823
28109	D10Wsu102e	hypothetical protein LOC28109	chr10:82828667:82831580:+	2	82831319-82831368,82830418-82830480
74039	Nfam1	NFAT activation molecule 1	chr15:82828226:82830165:-	1	82829330-82829370
327978	Slfn5	schlafen family member 5	chr11:82775206:82778352:+	4	82775566-82775617,82775438-82775482,82775974-82776013,82776041-82776088
83946	Phip	PH-interacting protein	chr9:82759766:82764830:-	1	82760081-82760156
217012	Unc45b	protein unc-45 homolog B	chr11:82756253:82756908:+	3	82756372-82756484,82756485-82756609,82756240-82756327
75734	Mff	mitochondrial fission factor	chr1:82748291:82748964:+	4	82748601-82748684,82748323-82748447,82748689-82748756,82748495-82748599
19364	Rad51l3	DNA repair protein RAD51 homolog 4	chr11:82686567:82692441:-	2	82692088-82692128,82687495-82687554
15277	Hk2	hexokinase-2	chr6:82675021:82677303:-	9	82675399-82675500,82675249-82675348,82675173-82675236,82676322-82676369,82676043-82676082,82675925-82676016,82675047-82675171,82676573-82676627,82676442-82676566
21411	Tcf20	transcription factor 20 isoform a	chr15:82639055:82640217:-	1	82639113-82639161
16882	Lig3	DNA ligase 3	chr11:82615016:82617776:+	1	82616916-82616969
24071	Synj2bp	synaptojanin-2-binding protein	chr12:82593183:82603012:-	5	82601424-82601469,82600502-82600543,82598630-82598691,82596171-82596232,82595316-82595357
66979	Pole4	DNA polymerase epsilon subunit 4	chr6:82596706:82598016:-	3	82597374-82597439,82597656-82597718,82597051-82597109
68268	Zdhhc21	probable palmitoyltransferase ZDHHC21	chr4:82444643:82452232:-	12	82450038-82450095,82445054-82445119,82449890-82449972,82448360-82448399,82444994-82445051,82451729-82451771,82451016-82451059,82450118-82450174,82445880-82445916,82450214-82450257,82450692-82450727,82448018-82448058
13405	dystrophin	Mus musculus adult retina cDNA, RIKEN full-length enriched library, clone:A930019F21 product:DYSTROPHIN homolog [Mus musculus], full insert sequence.	chrX:82447821:82450389:+	8	82447994-82448034,82448038-82448096,82450336-82450373,82449526-82449595,82449051-82449133,82449652-82449752,82449313-82449355,82449786-82449879
50493	Txnrd1	SubName: Full=Thioredoxin reductase 1; Flags: Fragment;	chr10:82358790:82360469:+	8	82359553-82359648,82359447-82359521,82359353-82359430,82359212-82359252,82360274-82360319,82359770-82359843,82359078-82359186,82360106-82360181
16367	Irs1	insulin receptor substrate 1	chr1:82229680:82234179:-	6	82231670-82231714,82231599-82231660,82229710-82229773,82230199-82230287,82230133-82230181,82232870-82232992
18045	Nfyb	nuclear transcription factor Y subunit beta	chr10:82211445:82213159:-	1	82212052-82212106
24015	Abce1	ATP-binding cassette sub-family E member 1	chr8:82207341:82209128:-	2	82208620-82208696,82207981-82208031
73945	Otud4	OTU domain-containing protein 4	chr8:82197881:82201654:+	17	82199148-82199233,82198795-82198881,82199721-82199819,82200498-82200609,82200352-82200456,82200009-82200086,82200629-82200703,82199630-82199696,82201002-82201118,82199028-82199142,82198384-82198492,82199282-82199357,82201411-82201475,82198161-82198248,82198905-82199026,82199448-82199519,82199831-82199938
338368	Fam109b	hypothetical protein LOC338368	chr15:82174491:82176140:+	1	82174576-82174637
20384	Srsf5	Mus musculus adult female placenta cDNA, RIKEN full-length enriched library, clone:1600028A20 product:splicing factor, arginine/serine-rich 5 (SRp40, HRS), full insert sequence.	chr12:82050965:82051494:+	1	82051192-82051249
20788	Srebf2	SubName: Full=Putative uncharacterized protein; SubName: Full=Srebf2 protein;	chr15:82034347:82035390:+	3	82035107-82035143,82034731-82034786,82034370-82034468
217684	4933426M11Rik	hypothetical protein LOC217684	chr12:81978108:81981820:+	10	81979717-81979765,81978917-81978962,81978185-81978253,81979142-81979228,81980067-81980130,81980803-81980901,81980398-81980443,81981299-81981353,81980305-81980394,81979449-81979501
18028	Nfib	nuclear factor 1 B-type isoform 3	chr4:81936077:81942697:-	28	81937100-81937151,81940927-81940999,81942214-81942259,81942309-81942415,81938900-81938982,81937781-81937877,81939595-81939632,81941865-81941928,81939371-81939434,81940858-81940918,81938649-81938706,81938796-81938896,81937669-81937721,81936813-81936887,81940767-81940840,81937587-81937668,81938588-81938648,81937469-81937531,81939665-81939712,81937945-81938030,81937247-81937364,81936585-81936643,819…
56284	Mrpl19	39S ribosomal protein L19, mitochondrial	chr6:81907840:81911934:-	2	81911090-81911143,81910249-81910286
60596	Gucy1a3	guanylate cyclase soluble subunit alpha-3	chr3:81896350:81898616:-	5	81898558-81898608,81898206-81898266,81897262-81897322,81898048-81898134,81896462-81896511
252875	Mios	WD repeat-containing protein mio	chr6:8185481:8186271:+	1	8185702-8185751
28075	Pppde2	PPPDE peptidase domain-containing protein 2	chr15:81822953:81825181:-	1	81823477-81823534
67486	Polr3g	DNA-directed RNA polymerase III subunit RPC7	chr13:81812836:81815034:-	1	81813605-81813646
80289	Lysmd3	Mus musculus adult male testis cDNA, RIKEN full-length enriched library, clone:4921511E12 product:hypothetical protein, MGC:7041, full insert sequence.	chr13:81808822:81810889:+	1	81809052-81809096
109136	Mmaa	RecName: Full=Methylmalonic aciduria type A homolog, mitochondrial; EC=3.6.-.-; Flags: Precursor;	chr8:81790323:81791826:-	1	81791701-81791764
20541	Slc8a1	sodium/calcium exchanger 1 isoform B	chr17:81772445:81788030:-	34	81785374-81785495,81773039-81773096,81786368-81786433,81773140-81773202,81784935-81785057,81780003-81780078,81783792-81783850,81785141-81785247,81772471-81772525,81787717-81787805,81787136-81787240,81787462-81787499,81783291-81783340,81782547-81782615,81773351-81773405,81786927-81787033,81787844-81787945,81780193-81780255,81785970-81786067,81785248-81785372,81776274-81776322,81787051-81787121,817…
105859	Csdc2	cold shock domain-containing protein C2	chr15:81779698:81781371:+	4	81779735-81779855,81779951-81780048,81780217-81780264,81780052-81780123
622675	Zfp827	zinc finger protein 827	chr8:81713566:81717665:+	7	81714870-81714912,81714768-81714859,81715869-81715906,81717077-81717113,81715307-81715383,81714656-81714716,81714528-81714584
68479	Phf5a	PHD finger-like domain-containing protein 5A	chr15:81694946:81696232:-	1	81695882-81695954
57259	Tob2	protein Tob2	chr15:81678700:81681158:-	5	81680510-81680576,81680199-81680294,81678940-81679008,81680341-81680437,81680763-81680836
21685	Tef	Mus musculus 18-day embryo whole body cDNA, RIKEN full-length enriched library, clone:1110038L23 product:unclassifiable, full insert sequence.	chr15:81654111:81657291:+	7	81655715-81655836,81655998-81656109,81657020-81657074,81654719-81654783,81655427-81655505,81655908-81655971,81657149-81657260
20286	Zc3h7b	zinc finger CCCH domain-containing protein 7B	chr15:81624195:81626699:+	3	81625820-81625876,81624275-81624328,81624745-81624810
19387	Rangap1	ran GTPase-activating protein 1	chr15:81534678:81535618:-	4	81535482-81535523,81535264-81535323,81535370-81535479,81534694-81534788
328572	Ep300	SubName: Full=Putative uncharacterized protein;	chr15:81481412:81482507:+	1	81481612-81481674
320808	Dcaf5	DDB1- and CUL4-associated factor 5	chr12:81437674:81439496:-	4	81439123-81439240,81438998-81439119,81438760-81438836,81439327-81439388
108116	Slco3a1	solute carrier organic anion transporter family	chr7:81426802:81429175:-	2	81428160-81428207,81426932-81426968
68027	Tmem178	transmembrane protein 178 precursor	chr17:81400411:81401156:+	1	81401101-81401140
78651	Lsm6	U6 snRNA-associated Sm-like protein LSm6	chr8:81330350:81332109:-	1	81331232-81331311
56438	Rbx1	E3 ubiquitin-protein ligase RBX1	chr15:81305528:81306799:+	2	81305597-81305691,81305517-81305574
321003	Xpnpep3	Mus musculus 3 days neonate thymus cDNA, RIKEN full-length enriched library, clone:A630059F20 product:hypothetical Creatinase/prolidase N-terminal domain structure containing protein, full insert sequence.	chr15:81283295:81285318:+	2	81284601-81284654,81284214-81284270
109711	Actn1	Mus musculus 13 days embryo head cDNA, RIKEN full-length enriched library, clone:3110023F10 product:ALPHA-ACTININ 1 (ALPHA-ACTININ CYTOSKELETAL ISOFORM) (NON-MUSCLE ALPHA-ACTININ 1) (F-ACTIN CROSS LINKING PROTEIN) homolog [Rattus norvegicus], full insert sequence.	chr12:81268530:81269308:-	1	81268762-81268814
76775	Slc10a7	sodium/bile acid cotransporter 7	chr8:81255537:81257904:+	1	81256891-81256946
12192	Zfp36l1	zinc finger protein 36, C3H1 type-like 1	chr12:81208747:81210575:-	1	81210351-81210409
70356	St13	hsc70-interacting protein	chr15:81195474:81195879:-	1	81195483-81195539
50721	Sirt6	NAD-dependent deacetylase sirtuin-6 isoform 2	chr10:81084531:81085157:-	1	81085134-81085175
170762	Nup155	nuclear pore complex protein Nup155	chr15:8107764:8109859:+	2	8108399-8108443,8108488-8108525
105171	mKIAA1376	Mus musculus adult retina cDNA, RIKEN full-length enriched library, clone:A930004L03 product:hypothetical Immunoglobulin structure containing protein, full insert sequence.	chr13:81032687:81035303:+	4	81033419-81033531,81034724-81034849,81033183-81033258,81033548-81033673
14797	Aes	amino-terminal enhancer of split	chr10:81028438:81029109:+	4	81028887-81028954,81028956-81029077,81028652-81028728,81028483-81028581
14672	Gna11	guanine nucleotide-binding protein subunit	chr10:80991477:80993539:-	1	80991644-80991682
225028	Map4k3	mitogen-activated protein kinase kinase kinase	chr17:80979852:80981187:-	1	80980405-80980462
103425	Ncln	nicalin precursor	chr10:80949204:80950290:-	1	80950151-80950188
50771	Atp9b	probable phospholipid-transporting ATPase IIB	chr18:80931816:80932751:-	2	80931967-80932007,80932185-80932267
17475	Mpdz	multiple PDZ domain protein	chr4:80924404:80925526:-	5	80924558-80924611,80924868-80924945,80925008-80925050,80925414-80925468,80924951-80924994
18029	Nfic	nuclear factor 1 C-type isoform b	chr10:80858936:80863816:-	14	80863115-80863169,80859763-80859808,80860613-80860700,80860491-80860538,80859288-80859345,80859922-80859971,80861115-80861224,80861257-80861375,80859233-80859275,80859048-80859132,80861984-80862050,80859372-80859453,80860824-80860897,80860131-80860228
56371	Fzr1	fizzy-related protein homolog	chr10:80829624:80830253:-	2	80829686-80829789,80829632-80829678
20662	Sos1	son of sevenless homolog 1	chr17:80793092:80797520:-	4	80795807-80795843,80795663-80795712,80796672-80796773,80793429-80793493
18717	Pip5k1c	phosphatidylinositol-4-phosphate 5-kinase type-1	chr10:80780513:80782714:+	3	80781140-80781201,80782268-80782326,80782158-80782223
11496	ADAM22	Mus musculus mRNA for ADAM22, complete cds.	chr5:8072352:8078685:-	3	8076985-8077025,8077812-8077871,8072792-8072870
213988	Tnrc6b	trinucleotide repeat-containing gene 6B protein	chr15:80759906:80771516:+	35	80762050-80762120,80763287-80763353,80768520-80768625,80767356-80767399,80769703-80769745,80769351-80769470,80768640-80768707,80763596-80763658,80767417-80767538,80761226-80761263,80768741-80768827,80760593-80760641,80763369-80763417,80765543-80765623,80760468-80760592,80767610-80767670,80761738-80761812,80764963-80765078,80769180-80769238,80769789-80769899,80765745-80765853,80764244-80764359,807…
103743	Tmem98	transmembrane protein 98	chr11:80634921:80635535:+	1	80635290-80635397
16969	Zbtb7a	zinc finger and BTB domain-containing protein	chr10:80611180:80614402:+	3	80613625-80613670,80612556-80612606,80613671-80613724
225027	Srsf7	serine/arginine-rich splicing factor 7 isoform	chr17:80599420:80600887:-	5	80599999-80600040,80600675-80600744,80599569-80599626,80600791-80600842,80599473-80599542
244059	Chd2	chromodomain helicase DNA binding protein 2	chr7:80571538:80574552:-	1	80572116-80572169
244058	Rgma	repulsive guidance molecule A precursor	chr7:80562919:80564785:+	1	80562884-80562943
52551	Sgta	small glutamine-rich tetratricopeptide	chr10:80506818:80507748:-	2	80507568-80507672,80506894-80506970
27366	Txnl4a	thioredoxin-like protein 4A isoform b	chr18:80419089:80422590:+	1	80419302-80419345
211978	Zfyve26	zinc finger FYVE domain-containing protein 26	chr12:80333334:80334952:-	1	80333815-80333855
12569	Cdk5r1	cyclin-dependent kinase 5 activator 1	chr11:80291934:80294681:+	1	80292476-80292538
20222	Sf3a2	splicing factor 3A subunit 2	chr10:80267559:80267667:+	1	80267558-80267616
26554	Cul3	cullin-3	chr1:80263393:80263730:-	1	80263568-80263644
78670	Plekhj1	Mus musculus adult male urinary bladder cDNA, RIKEN full-length enriched library, clone:9530063M10 product:guanine nucleotide releasing protein x, full insert sequence.	chr10:80258844:80259156:-	1	80259130-80259178
56298	Atl2	atlastin-2 isoform 1	chr17:80247732:80249498:-	8	80248041-80248102,80248859-80248937,80248449-80248557,80248134-80248186,80248808-80248854,80249174-80249240,80249316-80249370,80248564-80248671
66861	Dnajc10	SubName: Full=Putative uncharacterized protein; Flags: Fragment;	chr2:80193027:80194212:+	1	80193215-80193294
13617	Ednra	endothelin-1 receptor precursor	chr8:80186928:80188874:-	2	80187709-80187782,80188245-80188304
70591	5730455P16Rik	protein Njmu-R1	chr11:80174701:80177313:-	2	80175589-80175630,80177100-80177141
246104	Rhbdl3	rhomboid-related protein 3	chr11:80167185:80169457:+	1	80167914-80167973
17347	Mknk2	MAP kinase-interacting serine/threonine-protein	chr10:80128074:80129851:-	4	80128574-80128623,80128668-80128736,80129626-80129721,80128086-80128164
239555	Smcr7l	Smith-Magenis syndrome chromosomal region	chr15:80080565:80083154:+	3	80080824-80080925,80081322-80081414,80080677-80080766
59040	BC055823	Mus musculus 7 days embryo whole body cDNA, RIKEN full-length enriched library, clone:C430039G08 product:unclassifiable, full insert sequence.	chr11:80079361:80081409:+	5	80079913-80079958,80080305-80080359,80080097-80080203,80079621-80079662,80079696-80079745
56214	Scamp4	secretory carrier-associated membrane protein 4	chr10:80077528:80078528:+	2	80078450-80078508,80077877-80077935
20972	Syngr1	synaptogyrin-1 isoform 1b	chr15:79946506:79949931:+	2	79947425-79947471,79947368-79947416
73834	Atp6v1d	V-type proton ATPase subunit D	chr12:79943969:79944455:-	3	79943991-79944063,79944070-79944122,79944182-79944220
22380	Wbp4	WW domain-binding protein 4	chr14:79859744:79861728:-	2	79861484-79861530,79860911-79860961
211255	Kbtbd7	kelch repeat and BTB (POZ) domain containing 7	chr14:79828609:79830843:+	1	79829944-79830002
18591	Pdgfb	platelet-derived growth factor subunit B	chr15:79826306:79827687:-	2	79827002-79827113,79827594-79827647
20720	Serpine2	glia-derived nexin precursor	chr1:79790899:79791579:-	2	79791135-79791174,79790932-79790985
268566	Gphn	gephyrin isoform 2	chr12:79784898:79785725:+	1	79785163-79785222
78514	Arhgap10	rho GTPase-activating protein 10	chr8:79774265:79774817:-	1	79774275-79774352
216987	Utp6	U3 small nucleolar RNA-associated protein 6	chr11:79747458:79749456:-	1	79749127-79749179
52609	Cbx7	chromobox protein homolog 7	chr15:79746237:79748480:-	1	79747434-79747472
69368	Wdfy1	WD repeat and FYVE domain containing 1 isoform	chr1:79698837:79702085:-	1	79700959-79701025
70598	Filip1	filamin-A-interacting protein 1	chr9:79663369:79663497:-	1	79663405-79663478
494448	Cbx6	chromobox protein homolog 6	chr15:79654328:79658409:-	3	79657630-79657739,79655235-79655293,79656612-79656691
12696	Cirbp	cold-inducible RNA-binding protein	chr10:79633743:79634398:+	4	79634307-79634365,79633998-79634081,79633784-79633888,79634083-79634127
59090	Midn	midnolin	chr10:79619387:79621112:+	5	79619509-79619566,79620611-79620684,79620483-79620608,79620806-79620864,79619622-79619692
69981	Tmem30a	cell cycle control protein 50A	chr9:79616751:79619092:-	7	79618683-79618792,79616751-79616807,79618536-79618638,79618316-79618376,79618979-79619038,79617667-79617761,79618796-79618854
73340	Nptxr	neuronal pentraxin receptor	chr15:79616781:79620121:-	1	79616834-79616895
54152	Dnalc4	dynein light chain 4, axonemal	chr15:79591879:79592790:-	2	79592534-79592634,79592645-79592701
223697	Sun2	SUN domain-containing protein 2	chr15:79554500:79555876:-	6	79555322-79555391,79554847-79554904,79554768-79554840,79554584-79554673,79555198-79555286,79554708-79554757
14904	Gtpbp1	GTP-binding protein 1	chr15:79550529:79551909:+	3	79550884-79550996,79551304-79551349,79550791-79550871
70599	Ssfa2	sperm-specific antigen 2 homolog	chr2:79511916:79513121:+	2	79512155-79512214,79512472-79512575
74158	Josd1	Josephin-1	chr15:79504680:79506509:-	1	79505462-79505507
12798	Cnn2	calponin-2	chr10:79457359:79458145:+	2	79457407-79457481,79457600-79457646
66841	Etfdh	electron transfer flavoprotein-ubiquinone	chr3:79407710:79407923:-	1	79407804-79407873
18015	Nf1	Mus musculus 13 days embryo lung cDNA, RIKEN full-length enriched library, clone:D430030F20 product:neurofibromatosis 1, full insert sequence.	chr11:79391898:79395111:+	2	79394784-79394828,79394995-79395046
109284	C030046I01Rik	R3H domain-containing protein C19orf22 homolog	chr10:79372798:79373783:-	4	79373113-79373202,79373053-79373100,79372935-79373052,79372818-79372932
67040	Ddx17	probable ATP-dependent RNA helicase DDX17	chr15:79358126:79360441:-	4	79358808-79358916,79359137-79359195,79358931-79358998,79358476-79358546
75292	Prkd3	serine/threonine-protein kinase D3 isoform 3	chr17:79349900:79351196:-	1	79350344-79350390
22601	Yap1	yorkie homolog isoform 1	chr9:7932001:7934496:-	7	7933965-7934025,7932670-7932733,7933733-7933807,7932921-7932974,7933818-7933900,7934297-7934350,7932058-7932141
225131	Wac	WW domain-containing adapter protein with	chr18:7926137:7929025:+	1	7927976-7928025
19106	Eif2ak2	interferon-induced, double-stranded	chr17:79251890:79254478:-	1	79252186-79252272
53951	Ccdc75	coiled-coil domain-containing protein 75	chr17:79244539:79247648:+	1	79245162-79245208
223693	Tmem184b	transmembrane protein 184B	chr15:79191114:79193073:-	3	79191224-79191278,79191515-79191551,79191574-79191616
268980	Strn	striatin	chr17:79053304:79054829:-	6	79054612-79054674,79053968-79054027,79054519-79054582,79053487-79053548,79053821-79053876,79053714-79053777
240427	Setbp1	SET-binding protein	chr18:78947119:78951953:-	3	78951315-78951370,78951201-78951275,78949068-78949123
76089	Rapgef2	rap guanine nucleotide exchange factor 2	chr3:78866451:78868457:-	3	78867599-78867643,78867492-78867545,78866913-78866957
14958	H1f0	histone H1.0	chr15:78859736:78860930:+	3	78860673-78860792,78860468-78860565,78859984-78860033
225020	Fez2	fasciculation and elongation protein zeta-2	chr17:78777225:78778068:-	4	78777292-78777328,78777399-78777458,78777833-78777884,78777736-78777793
22193	Ube2e3	ubiquitin-conjugating enzyme E2 E3	chr2:78760212:78760740:+	4	78760377-78760447,78760542-78760661,78760293-78760358,78760455-78760496
66274	1810012P15Rik	hypothetical protein LOC66274	chr11:78652642:78657401:+	4	78656958-78657011,78653232-78653330,78656885-78656923,78652800-78652858
105844	Card10	caspase recruitment domain-containing protein	chr15:78605566:78607022:-	2	78605766-78605833,78606020-78606076
67102	D16Ertd472e	protein EURL homolog	chr16:78540583:78545362:-	3	78540888-78540929,78544087-78544129,78541309-78541345
23874	Farsb	phenylalanyl-tRNA synthetase beta chain	chr1:78421411:78421768:-	1	78421718-78421780
18099	Nlk	serine/threonine-protein kinase NLK	chr11:78380670:78382422:-	3	78380866-78380909,78381417-78381457,78381762-78381822
72709	C1qtnf6	Mus musculus 10, 11 days embryo whole body cDNA, RIKEN full-length enriched library, clone:2810036M19 product:weakly similar to COMPLEMENT-C1Q TUMOR NECROSIS FACTOR-RELATED PROTEIN [Homo sapiens], full insert sequence.	chr15:78354516:78355280:-	1	78355114-78355167
192216	Tmem47	transmembrane protein 47 isoform 2	chrX:78339969:78341802:+	2	78340894-78340930,78341102-78341171
13052	Cxadr	coxsackievirus and adenovirus receptor homolog	chr16:78336697:78340996:+	9	78340086-78340138,78340193-78340249,78338939-78339028,78338587-78338630,78337257-78337314,78336692-78336743,78338724-78338788,78337903-78337948,78338260-78338315
21927	Tnfaip1	BTB/POZ domain-containing adapter for	chr11:78336352:78338806:-	1	78336865-78336914
67811	Poldip2	polymerase delta-interacting protein 2	chr11:78335410:78336238:+	1	78336141-78336186
16185	Il2rb	interleukin-2 receptor subunit beta precursor	chr15:78310979:78311905:-	1	78311177-78311235
17187	Max	Mus musculus 7 days neonate cerebellum cDNA, RIKEN full-length enriched library, clone:A730011M08 product:Max protein, full insert sequence.	chr12:78038256:78039554:-	2	78038474-78038565,78038379-78038471
19293	Pvalb	parvalbumin alpha	chr15:78021548:78022095:-	1	78021939-78022062
11946	Atp5a1	ATP synthase subunit alpha, mitochondrial	chr18:78021121:78021607:+	3	78021200-78021323,78021368-78021494,78021074-78021198
216971	AK211079	Mus musculus adult male bone cDNA, RIKEN full-length enriched library, clone:9830160N08 product:hypothetical protein, full insert sequence.	chr11:77968805:77970841:+	4	77969275-77969310,77970076-77970121,77969947-77970019,77969636-77969694
71929	Tmem123	Mus musculus adult male tongue cDNA, RIKEN full-length enriched library, clone:2310075C12 product:weakly similar to PORIMIN [Homo sapiens], full insert sequence.	chr9:7792195:7794332:+	3	7793736-7793851,7793617-7793678,7793295-7793340
71538	Fbxo9	F-box only protein 9 isoform 1	chr9:77929306:77929786:-	3	77929339-77929422,77929545-77929607,77929455-77929533
216134	Pdxk	pyridoxal kinase	chr10:77899492:77903545:-	4	77899696-77899751,77899510-77899623,77903155-77903216,77903004-77903045
14252	Flot2	Mus musculus adult male lung cDNA, RIKEN full-length enriched library, clone:1200003P16 product:flotillin 2, full insert sequence.	chr11:77872735:77873934:+	5	77872843-77872927,77873197-77873265,77872757-77872794,77872928-77873026,77873035-77873139
212163	8030462N17Rik	hypothetical protein LOC212163	chr18:77872020:77873877:-	8	77872674-77872720,77873051-77873099,77873835-77873873,77872944-77873004,77873317-77873356,77873460-77873528,77873753-77873834,77872272-77872372
268448	Phf12	SubName: Full=Putative uncharacterized protein;	chr11:77843153:77844035:+	1	77843739-77843848
68801	Elovl5	elongation of very long chain fatty acids	chr9:77830615:77832320:+	1	77832050-77832140
231329	Polr2b	DNA-directed RNA polymerase II subunit RPB2	chr5:77778194:77778352:+	1	77778191-77778253
56551	Txn2	thioredoxin, mitochondrial precursor	chr15:77745481:77746173:-	3	77745757-77745826,77745855-77745964,77745518-77745620
28169	Agpat3	1-acyl-sn-glycerol-3-phosphate acyltransferase	chr10:77734308:77736431:-	3	77734676-77734764,77735619-77735682,77735756-77735821
263406	Plekhg3	pleckstrin homology domain-containing family G	chr12:77679395:77680026:+	1	77679837-77679872
360013	Myo18a	SubName: Full=Putative uncharacterized protein;	chr11:77678337:77679482:+	1	77679181-77679216
216131	Trappc10	Mus musculus adult male corpora quadrigemina cDNA, RIKEN full-length enriched library, clone:B230307C21 product:similar to EPILEPSY HOLOPROSENCEPHALY CANDIDATE-1 PROTEIN (EHOC-1) (TRANSMEMBRANE PROTEIN 1) (GT334 PROTEIN) [Homo sapiens], full insert sequence.	chr10:77649471:77650600:-	4	77649511-77649609,77649806-77649851,77649470-77649505,77650422-77650458
110816	Pwp2	periodic tryptophan protein 2 homolog	chr10:77633655:77634704:-	2	77634245-77634292,77633727-77633763
28295	D10Jhu81e	ES1 protein homolog, mitochondrial precursor	chr10:77624812:77625334:-	1	77624904-77624963
15368	Hmox1	heme oxygenase 1	chr8:77623918:77624491:+	2	77624317-77624380,77624268-77624307
17886	Myh9	myosin-9 isoform 1	chr15:77591019:77592328:-	3	77591384-77591422,77591927-77592000,77591262-77591380
70823	Hmgxb4	HMG domain-containing protein 4	chr8:77553932:77555871:+	1	77553954-77554010
68564	Nufip2	nuclear fragile X mental retardation-interacting	chr11:77523237:77531468:+	11	77523639-77523696,77523775-77523837,77523842-77523959,77524470-77524594,77527582-77527640,77526211-77526280,77524634-77524688,77525504-77525618,77524117-77524171,77525265-77525354,77524303-77524368
74318	Hopx	homeodomain-only protein	chr5:77516011:77516763:-	5	77516135-77516235,77516459-77516575,77516051-77516099,77516623-77516748,77516304-77516398
244923	Klhl31	kelch-like protein 31	chr9:77503666:77507929:+	8	77507758-77507820,77507495-77507588,77506837-77506899,77505432-77505507,77507404-77507454,77505545-77505670,77506908-77507025,77506611-77506654
268564	Zbtb1	zinc finger and BTB domain-containing protein 1	chr12:77488370:77489437:+	1	77488552-77488591
18641	Pfkl	6-phosphofructokinase, liver type	chr10:77449694:77450954:-	1	77450891-77450964
66661	Srp72	Mus musculus 8 days embryo whole body cDNA, RIKEN full-length enriched library, clone:5730412O15 product:signal recognition particle 72, full insert sequence.	chr5:77427394:77428960:+	3	77428341-77428379,77427824-77427922,77427726-77427817
67054	Paics	multifunctional protein ADE2	chr5:77395839:77396531:+	2	77395943-77395990,77396145-77396225
17344	Pias2	E3 SUMO-protein ligase PIAS2 isoform 4	chr18:77391436:77394447:+	2	77393013-77393061,77392111-77392168
13838	Epha4	ephrin type-A receptor 4 precursor	chr1:77363760:77366246:-	4	77365572-77365667,77365238-77365296,77365126-77365168,77365668-77365715
237387	Lrrc3	leucine-rich repeat-containing protein 3	chr10:77360320:77363571:-	1	77362443-77362479
216965	Taok1	serine/threonine-protein kinase TAO1	chr11:77342664:77351368:-	27	77348024-77348082,77349753-77349864,77342748-77342821,77345524-77345586,77343817-77343856,77348408-77348516,77350166-77350253,77346491-77346590,77345148-77345242,77351135-77351247,77347076-77347151,77350623-77350686,77349614-77349727,77345272-77345383,77344634-77344691,77343892-77343953,77345719-77345835,77348577-77348653,77349876-77349993,77343648-77343705,77347301-77347345,77346074-77346177,773…
231326	AASDH	Mus musculus AASDH mRNA for 2-aminoadipic 6-semialdehyde dehydrogenase, complete cds.	chr5:77304963:77305048:-	1	77305001-77305054
214345	Lrrc1	leucine-rich repeat-containing protein 1 isoform	chr9:77278630:77279928:-	3	77279817-77279934,77279642-77279729,77279528-77279582
237860	AK217986	Mus musculus cDNA, clone:Y2G0104L19, strand:minus, reference:ENSEMBL:Mouse-Transcript-ENST:ENSMUST00000021698, based on BLAT search.	chr11:77268982:77269050:+	1	77268988-77269036
241494	Zfp385b	zinc finger protein 385B isoform 3	chr2:77248689:77249981:-	2	77249418-77249457,77248876-77248918
76987	Hdhd2	haloacid dehalogenase-like hydrolase	chr18:77209453:77210910:+	2	77209448-77209493,77210659-77210715
66191	Ier3ip1	immediate early response 3-interacting protein	chr18:77179307:77180344:+	2	77180014-77180076,77179496-77179559
30940	Usp25	ubiquitin carboxyl-terminal hydrolase 25	chr16:77115807:77117025:+	2	77116109-77116174,77116261-77116351
22213	Ube2g2	ubiquitin-conjugating enzyme E2 G2	chr10:77107304:77108735:+	2	77107793-77107849,77107462-77107528
20610	Sumo3	small ubiquitin-related modifier 3 precursor	chr10:77079003:77081076:+	4	77079297-77079367,77079921-77079980,77080021-77080139,77079194-77079264
108705	Pttg1ip	pituitary tumor-transforming gene 1	chr10:77059810:77061477:+	2	77060138-77060259,77059945-77060067
228071	Sestd1	SEC14 domain and spectrin repeat-containing	chr2:77024132:77025187:-	2	77024910-77024952,77024496-77024552
93686	Rbfox2	RNA-binding protein 9 isoform 4	chr15:76909420:76914591:-	18	76912783-76912898,76911032-76911073,76913621-76913656,76909798-76909840,76912906-76912974,76912539-76912610,76914150-76914233,76910338-76910389,76910934-76911028,76913075-76913127,76912721-76912768,76910110-76910221,76910036-76910104,76914242-76914363,76910225-76910325,76911619-76911722,76911340-76911440,76910828-76910910
21807	mKIAA1994	Mus musculus mRNA for mKIAA1994 protein.	chr14:76906481:76907568:+	5	76907375-76907469,76907111-76907233,76907259-76907373,76906816-76906881,76906710-76906811
237859	Ccdc55	coiled-coil domain-containing protein 55	chr11:76857794:76859241:-	1	76858527-76858605
17189	Mb	myoglobin	chr15:76845919:76846355:-	4	76845923-76846038,76846163-76846289,76846043-76846162,76846290-76846414
81535	Sgpp1	sphingosine-1-phosphate phosphatase 1	chr12:76815235:76817099:-	6	76815707-76815790,76816409-76816454,76815797-76815843,76815291-76815374,76816906-76816958,76816055-76816106
104184	Blmh	bleomycin hydrolase	chr11:76800129:76800878:+	2	76800403-76800476,76800578-76800637
110532	Adarb1	double-stranded RNA-specific editase 1 isoform	chr10:76753472:76757706:-	1	76753864-76753917
71591	AK018584	Mus musculus adult male cecum cDNA, RIKEN full-length enriched library, clone:9130001M19 product:unclassifiable, full insert sequence.	chr15:76682574:76683422:-	1	76683291-76683347
12753	Clock	circadian locomoter output cycles protein kaput	chr5:76641202:76645723:-	11	76642669-76642770,76643329-76643411,76643501-76643555,76642809-76642877,76644953-76645059,76643914-76643974,76643665-76643732,76641290-76641344,76643266-76643315,76645171-76645237,76642887-76642938
225845	Pla2g16	group XVI phospholipase A2	chr19:7660156:7663035:+	1	7660722-7660759
12874	Cpd	carboxypeptidase D precursor	chr11:76590710:76595685:-	9	76593434-76593489,76594303-76594385,76594757-76594812,76594825-76594911,76594034-76594093,76593242-76593306,76591976-76592019,76592630-76592718,76592942-76593016
223665	C030006K11Rik	hypothetical protein LOC223665 isoform 2	chr15:76551896:76553413:-	1	76552892-76552955
26932	Ppp2r5e	serine/threonine-protein phosphatase 2A 56 kDa	chr12:76551868:76554700:-	5	76552545-76552598,76553003-76553045,76553236-76553320,76554593-76554690,76551978-76552081
22138	Ttn	SubName: Full=Ttn protein; Flags: Fragment;	chr2:76542041:76543087:-	5	76543057-76543106,76542060-76542141,76542600-76542644,76542402-76542483,76542260-76542367
53334	Gosr1	Golgi SNAP receptor complex member 1	chr11:76540104:76543610:-	2	76541456-76541519,76543121-76543182
14231	Fkbp7	peptidyl-prolyl cis-trans isomerase FKBP7	chr2:76501091:76501247:-	1	76501124-76501187
67467	1200011I18Rik	hypothetical protein LOC67467	chr14:76486039:76490334:-	3	76486617-76486682,76489310-76489370,76489505-76489554
23992	Prkra	interferon-inducible double stranded	chr2:76467994:76468467:-	3	76468234-76468321,76467996-76468048,76468078-76468163
99031	mKIAA4128	Mus musculus 16 days neonate thymus cDNA, RIKEN full-length enriched library, clone:A130038P17 product:OSBP-RELATED PROTEIN 6 homolog [Homo sapiens], full insert sequence.	chr2:76434039:76438704:+	9	76434825-76434871,76438144-76438203,76437405-76437471,76436398-76436475,76437683-76437733,76434492-76434551,76435795-76435837,76434619-76434668,76437077-76437139
20937	Suv39h1	histone-lysine N-methyltransferase SUV39H1	chrX:7638430:7639975:-	2	7639458-7639520,7638643-7638698
16542	Kdr	vascular endothelial growth factor receptor 2	chr5:76329299:76330447:-	1	76330051-76330110
68652	Tab2	TGF-beta-activated kinase 1 and MAP3K7-binding	chr10:7625446:7627232:-	4	7626400-7626476,7626209-7626263,7626549-7626607,7625563-7625612
109934	Abr	active breakpoint cluster region-related protein	chr11:76230236:76232605:-	6	76232268-76232339,76232343-76232429,76231951-76232019,76231787-76231827,76232048-76232110,76230971-76231036
56322	Timm22	mitochondrial import inner membrane translocase	chr11:76227624:76229794:+	1	76228735-76228778
12833	Col6a1	collagen alpha-1(VI) chain precursor	chr10:76171537:76172303:-	2	76171939-76172002,76171717-76171774
338337	Cog3	conserved oligomeric Golgi complex subunit 3	chr14:76102158:76103837:-	2	76102359-76102408,76103289-76103348
109168	Atl3	atlastin-3 isoform 1	chr19:7608526:7613098:+	4	7609664-7609746,7611128-7611185,7610047-7610106,7609311-7609352
66168	Grina	glutamate [NMDA] receptor-associated protein 1	chr15:76079796:76080334:+	3	76079852-76079917,76079926-76079973,76079983-76080038
67201	Glod4	glyoxalase domain-containing protein 4	chr11:76033897:76035467:-	3	76034496-76034560,76035345-76035438,76034675-76034728
73296	mKIAA0878	Mus musculus adult male testis cDNA, RIKEN full-length enriched library, clone:1700040C17 product:hypothetical BTB/POZ domain/Prenyl group binding site (CAAX box) containing protein, full insert sequence.	chr13:76006985:76009793:-	1	76007333-76007433
18810	Plec	plectin isoform 1a	chr15:76001405:76002599:-	4	76001925-76001963,76001770-76001876,76001462-76001565,76002349-76002429
223649	Nrbp2	nuclear receptor-binding protein 2	chr15:75916024:75917505:-	1	75916878-75916931
192657	Ell2	RNA polymerase II elongation factor ELL2	chr13:75908244:75909806:+	3	75909186-75909272,75909054-75909160,75909557-75909603
66412	Arrdc4	arrestin domain containing 4 isoform 1	chr7:75881880:75884362:-	1	75883175-75883225
18541	Pcnt	SubName: Full=Putative uncharacterized protein; Flags: Fragment;	chr10:75813999:75814483:-	1	75814087-75814143
268977	Ltbp1	latent-transforming growth factor beta-binding	chr17:75789893:75791109:+	1	75790235-75790279
228061	Agps	alkyldihydroxyacetonephosphate synthase,	chr2:75764100:75767706:+	8	75766434-75766527,75766022-75766122,75764173-75764252,75764690-75764808,75764561-75764620,75764501-75764546,75766237-75766292,75766591-75766687
64451	mKIAA0184	Mus musculus mRNA for mKIAA0184 protein.	chr10:75725794:75727365:-	1	75726824-75726859
73124	Golim4	Golgi integral membrane protein 4	chr3:75680306:75681952:-	3	75681113-75681192,75681370-75681421,75681609-75681657
15468	Prmt2	Mus musculus arginine methyltransferase (Prmt2) mRNA, complete cds.	chr10:75669967:75670505:-	2	75669994-75670064,75670162-75670253
18826	Lcp1	plastin-2	chr14:75629145:75630610:+	1	75629609-75629662
269037	Gm672	CBP80/20-dependent translation initiation	chr18:75590871:75594847:-	1	75592106-75592146
22627	Ywhae	14-3-3 protein epsilon	chr11:75578174:75579341:+	4	75578649-75578764,75578449-75578521,75578198-75578282,75578808-75578930
17131	Smad7	mothers against decapentaplegic homolog 7	chr18:75554019:75555588:+	4	75554470-75554533,75554286-75554373,75554392-75554435,75554168-75554285
12928	Crk	adapter molecule crk	chr11:75517005:75519594:+	3	75518689-75518797,75517525-75517599,75518385-75518486
64453	Zfp280b	zinc finger protein 280b	chr10:75502638:75505714:+	3	75504915-75504957,75503713-75503754,75504539-75504585
22701	Zfp41	zinc finger protein 41	chr15:75453981:75455725:+	1	75455557-75455604
18738	Pitpna	phosphatidylinositol transfer protein alpha	chr11:75439619:75442280:+	3	75439772-75439885,75440255-75440297,75440095-75440173
11790	Speg	striated muscle-specific	chr1:75428026:75428881:+	1	75428730-75428843
67418	Ppil4	Mus musculus 10 days embryo whole body cDNA, RIKEN full-length enriched library, clone:2610018B07 product:DJ12G14.1 (NOVEL CYCLOPHILIN TYPE PEPTIDYL-PROLYL CIS-TRANS ISOMERASE) (FRAGMENT) homolog [Homo sapiens], full insert sequence.	chr10:7541001:7542361:+	2	7541500-7541589,7541416-7541465
74277	Chic2	cysteine-rich hydrophobic domain 2 protein	chr5:75402449:75402737:-	1	75402670-75402717
215113	Slc43a2	large neutral amino acids transporter small	chr11:75385978:75388543:+	2	75386482-75386565,75386846-75386945
16001	Igf1r	insulin-like growth factor 1 receptor	chr7:75371287:75378553:+	2	75371672-75371714,75376259-75376348
13346	Des	desmin	chr1:75363625:75364290:+	1	75363697-75363788
19275	Ptprn	receptor-type tyrosine-protein phosphatase-like	chr1:75243616:75244123:-	1	75243784-75243855
56812	Dnajb2	dnaJ homolog subfamily B member 2 isoform 2	chr1:75240388:75242265:+	2	75240814-75240905,75240694-75240769
50772	Mapk6	mitogen-activated protein kinase 6	chr9:75234708:75235858:-	3	75234944-75235012,75235033-75235077,75235212-75235259
22145	Tuba4a	tubulin alpha-4A chain	chr1:75211549:75212196:-	2	75211549-75211675,75212034-75212143
14697	Gnb5	guanine nucleotide-binding protein subunit	chr9:75192771:75193478:+	3	75193179-75193225,75192980-75193020,75193049-75193150
245860	Atg9a	autophagy-related protein 9A	chr1:75177440:75178499:-	1	75177880-75177989
407819	BC031181	hypothetical protein LOC407819	chr18:75168997:75169587:+	1	75169502-75169556
380916	Lrch1	leucine-rich repeat and calponin homology	chr14:75154480:75156839:-	1	75154559-75154600
227298	Fam134a	hypothetical protein LOC227298	chr1:75143629:75144483:+	1	75143968-75144019
69171	1810031K17Rik	hypothetical protein LOC69171	chr1:75131789:75132972:-	1	75132454-75132508
21333	Tac1	protachykinin-1	chr6:7512432:7512973:+	1	7512830-7512873
68275	Rpa1	replication protein A 70 kDa DNA-binding subunit	chr11:75113761:75114806:-	1	75114608-75114649
74166	Tmem38a	trimeric intracellular cation channel type A	chr8:75109985:75111183:+	2	75110249-75110303,75110382-75110460
12211	Birc6	baculoviral IAP repeat-containing 6	chr17:75101723:75103113:+	2	75101701-75101751,75102157-75102195
66818	9130011J15Rik	hypothetical protein LOC66818 precursor	chr8:75089097:75091691:-	4	75091319-75091397,75090439-75090488,75091605-75091709,75090537-75090584
75627	Snapc1	snRNA-activating protein complex subunit 1	chr12:75084884:75085807:+	4	75085758-75085802,75085629-75085672,75085285-75085364,75085119-75085171
15251	Hif1a	hypoxia-inducible factor 1-alpha	chr12:75046690:75048516:+	5	75047474-75047578,75047596-75047702,75047738-75047838,75046694-75046801,75047127-75047162
20168	AK043844	Mus musculus 10 days neonate cortex cDNA, RIKEN full-length enriched library, clone:A830039H05 product:unclassifiable, full insert sequence.	chr19:7500391:7502319:-	6	7502206-7502253,7501324-7501382,7500529-7500647,7501237-7501319,7501569-7501647,7502121-7502196
19108	Prkx	serine/threonine-protein kinase PRKX	chrX:75007374:75009230:-	4	75008955-75009021,75008612-75008670,75008340-75008387,75008833-75008944
270066	Slc35e1	RecName: Full=Solute carrier family 35 member E1;	chr8:75001894:75007664:-	10	75002553-75002608,75005030-75005130,75005950-75006005,75005725-75005782,75004113-75004169,75001956-75002017,75005414-75005476,75005589-75005655,75003789-75003865,75004821-75004859
108899	2700081O15Rik	hypothetical protein LOC108899	chr19:7497596:7500393:+	2	7499927-7499971,7497982-7498039
66899	Fip1l1	pre-mRNA 3'-end-processing factor FIP1 isoform	chr5:74992011:74993149:+	1	74991991-74992028
68778	1110038D17Rik	Mus musculus adult male diencephalon cDNA, RIKEN full-length enriched library, clone:9330209J05 product:CDNA FLJ30119 FIS, CLONE BRACE1000070 homolog [Homo sapiens], full insert sequence.	chr10:74969559:74971622:-	1	74970653-74970753
52538	Acaa2	3-ketoacyl-CoA thiolase, mitochondrial	chr18:74965593:74965861:+	1	74965626-74965745
66928	3110001D03Rik	transmembrane protein C9orf123 homolog	chr4:74923258:74923608:-	1	74923508-74923547
59046	Arpp19	Mus musculus 11 days embryo whole body cDNA, RIKEN full-length enriched library, clone:2700024H10 product:unclassifiable, full insert sequence.	chr9:74904612:74908120:+	7	74904727-74904811,74907114-74907237,74904616-74904711,74905227-74905299,74905712-74905816,74905830-74905904,74906976-74907049
13859	Eps15l1	epidermal growth factor receptor substrate	chr8:74901316:74902874:-	7	74902748-74902836,74901276-74901317,74901773-74901881,74902168-74902233,74902023-74902082,74901680-74901734,74901887-74901976
67864	Yipf4	protein YIPF4	chr17:74898448:74899617:+	1	74898453-74898506
235493	BC031353	Mus musculus 0 day neonate eyeball cDNA, RIKEN full-length enriched library, clone:E130302P19 product:hypothetical protein, full insert sequence.	chr9:74879475:74880275:+	1	74879605-74879712
17067	Ly6c1	lymphocyte antigen 6C2 precursor	chr15:74875445:74875831:-	1	74875757-74875794
21855	Timm17b	mitochondrial import inner membrane translocase	chrX:7483702:7484778:+	2	7483919-7483961,7483981-7484025
12380	Cast	calpastatin	chr13:74831734:74832281:-	2	74832084-74832140,74831798-74831884
110454	Ly6a	lymphocyte antigen 6A-2/6E-1 precursor	chr15:74825307:74825691:-	2	74825438-74825519,74825305-74825386
17069	Ly6e	lymphocyte antigen 6E	chr15:74789143:74790335:+	1	74789098-74789199
50850	Spast	spastin isoform 1	chr17:74787652:74790453:+	4	74788717-74788805,74788060-74788115,74789695-74789805,74789293-74789379
11767	Ap1m1	AP-1 complex subunit mu-1	chr8:74780656:74781278:+	3	74780886-74780938,74780951-74781020,74781060-74781110
74392	mKIAA0376	Mus musculus mRNA for mKIAA0376 protein.	chr10:74772624:74775144:+	8	74773116-74773215,74775086-74775138,74774558-74774638,74773960-74774034,74773709-74773760,74774080-74774172,74772996-74773050,74774417-74774520
54633	Pqbp1	polyglutamine-binding protein 1	chrX:7471649:7471836:-	2	7471657-7471728,7471729-7471849
22232	Slc35a2	UDP-galactose translocator isoform 2	chrX:7470012:7471153:+	1	7470896-7470960
326618	Tpm4	tropomyosin alpha-4 chain	chr8:74675723:74677028:+	1	74675863-74675899
97761	mKIAA0397	Mus musculus adult male medulla oblongata cDNA, RIKEN full-length enriched library, clone:6330407O08 product:inferred: KIAA0397 protein {Homo sapiens}, full insert sequence.	chr11:74662766:74664308:-	1	74663163-74663235
67867	Lrrc28	SubName: Full=Putative uncharacterized protein;	chr7:74658297:74660064:-	1	74658944-74658999
17428	Mnt	max-binding protein MNT	chr11:74656822:74659227:+	3	74658929-74658971,74658533-74658587,74658154-74658191
66821	Bcs1l	mitochondrial chaperone BCS1	chr1:74638645:74639017:+	1	74638698-74638740
77264	Zfp142	SubName: Full=Zinc finger 142;	chr1:74611702:74613451:-	1	74613035-74613075
68939	Rasl11b	ras-like protein family member 11B	chr5:74594604:74595502:+	1	74595185-74595293
67433	Ccdc127	coiled-coil domain-containing protein 127	chr13:74494565:74497109:+	3	74496531-74496590,74496041-74496135,74495952-74496029
18472	AK039862	Mus musculus 0 day neonate thymus cDNA, RIKEN full-length enriched library, clone:A430022G17 product:unclassifiable, full insert sequence.	chr11:74487452:74491170:-	19	74488656-74488763,74488512-74488633,74488300-74488410,74488058-74488121,74490635-74490695,74489827-74489934,74489984-74490084,74489192-74489241,74487525-74487574,74488412-74488511,74490513-74490634,74489110-74489179,74490703-74490819,74490838-74490888,74490377-74490483,74489420-74489536,74488160-74488272,74490890-74490991,74490274-74490376
74148	1300001I01Rik	Mus musculus adult male liver cDNA, RIKEN full-length enriched library, clone:1300001I01 product:weakly similar to PUTATIVE EUKARYOTIC TRANSLATION INITIATION FACTOR 3 SUBUNIT (EIF-3) (FRAGMENT) [Homo sapiens], full insert sequence.	chr11:74483112:74484349:+	4	74483476-74483592,74483599-74483653,74484043-74484151,74483349-74483475
66945	Sdha	succinate dehydrogenase [ubiquinone]	chr13:74459703:74460534:-	7	74459914-74460004,74459747-74459818,74460471-74460589,74460107-74460226,74460348-74460462,74460228-74460291,74460011-74460086
18767	Pkia	cAMP-dependent protein kinase inhibitor alpha	chr3:7442090:7445365:+	16	7444995-7445079,7444861-7444905,7443921-7443990,7442689-7442751,7443253-7443354,7444143-7444199,7444300-7444353,7444634-7444723,7442353-7442450,7442506-7442622,7443124-7443197,7443994-7444036,7445183-7445300,7442296-7442351,7444529-7444575,7444072-7444117
227292	Ctdsp1	carboxy-terminal domain RNA polymerase II	chr1:74442158:74443851:+	5	74443332-74443394,74443271-74443321,74442347-74442459,74442861-74442921,74442633-74442695
236193	Zfp709	zinc finger protein 709	chr8:74414811:74416464:+	1	74415554-74415593
56695	Pnkd	probable hydrolase PNKD isoform 2	chr1:74398505:74400266:+	4	74399872-74399948,74399488-74399567,74399689-74399813,74400115-74400221
69727	Usp46	ubiquitin carboxyl-terminal hydrolase 46	chr5:74396062:74398059:-	4	74396401-74396471,74397737-74397795,74397545-74397619,74397678-74397718
74322	Cxxc1	cpG-binding protein	chr18:74380859:74381145:+	1	74380897-74380975
17258	Mef2a	RecName: Full=Myocyte-specific enhancer factor 2A;	chr7:74378717:74379753:-	6	74379333-74379410,74379547-74379623,74379420-74379537,74378790-74378847,74379625-74379679,74379690-74379781
69605	Lnp	protein lunapark isoform a	chr2:74352894:74360345:-	15	74356487-74356551,74357898-74357949,74357256-74357329,74355378-74355422,74354809-74354892,74355666-74355747,74359405-74359445,74357543-74357622,74354141-74354229,74357361-74357398,74359327-74359369,74358110-74358213,74356111-74356202,74353504-74353540,74356917-74357031
69660	Tmbim1	transmembrane BAX inhibitor motif-containing	chr1:74334822:74335945:-	2	74335622-74335712,74334969-74335030
227290	Aamp	angio-associated migratory cell protein isoform	chr1:74326421:74326807:-	1	74326496-74326574
211446	Exoc3	exocyst complex component 3	chr13:74307253:74309520:-	4	74308468-74308570,74309457-74309562,74309366-74309456,74309291-74309364
22436	Xdh	xanthine dehydrogenase/oxidase	chr17:74233248:74233772:-	1	74233281-74233321
20474	Six4	homeobox protein SIX4	chr12:74201246:74204428:-	4	74201346-74201387,74203577-74203621,74201272-74201309,74203651-74203696
380711	Rap1gap2	rap1 GTPase-activating protein 2	chr11:74196985:74201013:-	14	74199409-74199495,74197252-74197368,74200874-74200917,74197085-74197193,74200609-74200655,74197373-74197425,74197734-74197858,74197541-74197604,74200328-74200385,74198076-74198125,74199179-74199296,74197468-74197537,74198237-74198279,74196989-74197054
72948	Tppp	tubulin polymerization-promoting protein	chr13:74168863:74173201:+	4	74171287-74171339,74171100-74171176,74171194-74171237,74172352-74172412
234407	Glt25d1	procollagen galactosyltransferase 1 precursor	chr8:74147659:74148810:+	3	74148553-74148605,74148129-74148192,74148399-74148435
268859	Rbfox1	fox-1 homolog A isoform gamma	chr16:7409906:7412572:+	7	7411450-7411525,7410514-7410569,7410362-7410408,7410123-7410225,7410894-7410943,7411089-7411147,7411321-7411438
225724	Mapk4	mitogen-activated protein kinase 4	chr18:74088141:74090051:-	1	74089482-74089529
24051	Sgcb	beta-sarcoglycan	chr5:74023988:74026733:-	1	74025520-74025557
20916	Sucla2	Mus musculus adult male cerebellum cDNA, RIKEN full-length enriched library, clone:1500017C15 product:succinate-Coenzyme A ligase, ADP-forming, beta subunit, full insert sequence.	chr14:73995255:73995949:+	1	73995243-73995291
20499	Slc12a7	SubName: Full=Putative uncharacterized protein; SubName: Full=Solute carrier family 12, member 7, isoform CRA_a;	chr13:73952382:73954190:+	7	73952833-73952954,73953943-73954008,73953757-73953874,73953641-73953719,73954031-73954117,73953433-73953490,73953521-73953638
100737	Dcun1d4	DCN1-like protein 4 isoform A	chr5:73948926:73952025:+	8	73948918-73948972,73950077-73950166,73949619-73949734,73948983-73949046,73949069-73949129,73949888-73949931,73949794-73949886,73950173-73950209
107029	Me2	NAD-dependent malic enzyme, mitochondrial	chr18:73929694:73930279:-	1	73929843-73929884
19042	Ppm1a	protein phosphatase 1A	chr12:73894728:73895926:+	3	73895053-73895167,73895178-73895294,73894900-73895011
114615	Elac1	zinc phosphodiesterase ELAC protein 1	chr18:73894692:73898487:-	1	73894769-73894828
17925	Myo9b	myosin-IXb isoform 3	chr8:73883567:73884611:+	1	73883988-73884030
17128	Smad4	Mus musculus cDNA pooled tissues:(tissue_type=brain,dev_stage=8-12 days neonate,strain=BALB/c),(tissue_type=testis,dev_stage=adult, strain=C57BL/6J), clone:V01X010K15.	chr18:73798667:73799911:-	1	73799752-73799807
117589	Asb7	SubName: Full=Ankyrin repeat and SOCS box-containing protein 7, isoform CRA_c; SubName: Full=Asb7 protein;	chr7:73789457:73792811:-	1	73789486-73789533
76478	Haus8	HAUS augmin-like complex subunit 8 isoform 2	chr8:73775024:73775292:-	1	73775083-73775129
16432	Itm2b	integral membrane protein 2B	chr14:73762039:73762864:-	5	73762168-73762274,73762276-73762376,73762724-73762841,73762404-73762528,73762842-73762891
228033	Atp5g3	ATP synthase lipid-binding protein,	chr2:73746507:73746649:-	2	73746640-73746747,73746515-73746635
433904	Ociad2	OCIA domain-containing protein 2	chr5:73713438:73715004:-	1	73713744-73713787
68095	Ociad1	OCIA domain-containing protein 1 isoform 3	chr5:73698009:73700595:+	6	73698993-73699039,73698731-73698836,73698110-73698158,73699875-73699937,73699770-73699834,73699457-73699521
11909	Atf2	cyclic AMP-dependent transcription factor ATF-2	chr2:73654579:73656978:-	7	73655814-73655885,73655716-73655799,73656048-73656145,73654795-73654847,73655614-73655681,73654921-73654968,73655947-73656040
225010	Lclat1	lysocardiolipin acyltransferase 1	chr17:73589560:73592706:+	8	73591244-73591316,73591846-73591905,73592228-73592293,73589567-73589669,73589727-73589782,73590628-73590690,73592066-73592115,73590872-73590943
19245	Ptp4a3	protein tyrosine phosphatase type IVA 3 isoform	chr15:73587344:73589196:+	1	73587364-73587489
105670	Rcbtb2	RCC1 and BTB domain-containing protein 2	chr14:73582406:73583500:+	2	73582718-73582802,73582885-73582991
239530	Gpr20	G-protein coupled receptor 20	chr15:73525037:73525891:-	1	73525245-73525293
209446	Tcfe3	transcription factor E3 isoform a	chrX:7351057:7352328:+	1	7352054-7352099
18537	Pcmt1	RecName: Full=Protein-L-isoaspartate O-methyltransferase; EC=2.1.1.77; Flags: Fragment;	chr10:7350035:7350774:-	3	7350331-7350421,7350203-7350314,7350055-7350134
13728	Mark2	serine/threonine-protein kinase MARK2 isoform 4	chr19:7349886:7351579:-	1	7350205-7350267
108699	Chn1	N-chimaerin isoform 2	chr2:73448802:73451081:-	5	73450548-73450597,73450890-73450925,73450335-73450382,73450937-73451015,73450756-73450799
12038	Bche	cholinesterase precursor	chr3:73439731:73443838:-	2	73442749-73442785,73442414-73442468
270058	Mtap1s	microtubule-associated protein 1S	chr8:73441106:73441428:+	1	73441275-73441315
72313	Fryl	SubName: Full=Fryl protein;	chr5:73411430:73413277:-	2	73412596-73412704,73412745-73412782
50916	Irx4	iroquois-class homeodomain protein IRX-4	chr13:73406482:73407043:+	1	73406795-73406847
75991	Slain2	SLAIN motif-containing protein 2 isoform a	chr5:73367302:73370067:+	10	73369320-73369387,73369555-73369618,73368430-73368487,73367892-73367960,73367592-73367644,73368792-73368853,73369448-73369549,73368251-73368361,73367962-73368064,73368620-73368683
269941	Chsy1	chondroitin sulfate synthase 1	chr7:73317307:73318684:+	1	73317684-73317739
18709	Pik3r2	phosphatidylinositol 3-kinase regulatory subunit	chr8:73292080:73292588:-	1	73292214-73292249
77889	Lbh	protein LBH	chr17:73288784:73291286:+	14	73290422-73290529,73289083-73289187,73290267-73290384,73289654-73289723,73289310-73289422,73290816-73290937,73290567-73290693,73288960-73289029,73289984-73290051,73290694-73290815,73290135-73290255,73291030-73291147,73288798-73288877,73290944-73291014
19339	Rab3a	ras-related protein Rab-3A	chr8:73281987:73282506:+	1	73282109-73282204
215280	Wipf1	WAS/WASL-interacting protein family member 1	chr2:73267674:73270466:-	2	73268045-73268091,73270390-73270431
16478	Jund	transcription factor jun-D	chr8:73223982:73224515:+	1	73224264-73224354
383295	Ypel5	protein yippee-like 5	chr17:73198144:73200535:+	2	73199937-73200000,73198452-73198514
74616	Scrn3	SubName: Full=Secernin 3; SubName: Full=Secernin 3, isoform CRA_b;	chr2:73173938:73175864:+	8	73175003-73175076,73175298-73175387,73174162-73174202,73174900-73174946,73175621-73175658,73174321-73174376,73174055-73174098,73174685-73174740
66522	Pgpep1	pyroglutamyl-peptidase 1	chr8:73173010:73174491:-	3	73173993-73174111,73173163-73173231,73173712-73173784
13716	Ell	RNA polymerase II elongation factor ELL	chr8:73115513:73116757:+	1	73115989-73116051
208846	Daam1	disheveled-associated activator of morphogenesis	chr12:73090875:73093354:+	11	73092548-73092607,73091066-73091135,73090959-73091065,73093240-73093280,73093152-73093189,73091440-73091500,73091139-73091188,73092462-73092546,73092130-73092250,73092856-73092922,73091929-73092030
14232	Fkbp8	peptidyl-prolyl cis-trans isomerase FKBP8	chr8:73058852:73059227:+	3	73058851-73058892,73059058-73059115,73058988-73059050
102866	Pls3	plastin-3	chrX:73031002:73032105:-	2	73031770-73031829,73031584-73031699
66048	Tmem93	transmembrane protein 93	chr11:72989035:72989872:-	2	72989669-72989726,72989451-72989532
225215	Rsl24d1	probable ribosome biogenesis protein RLP24	chr9:72970144:72971140:+	1	72970785-72970824
319448	mKIAA0970	Mus musculus 16 days embryo head cDNA, RIKEN full-length enriched library, clone:C130081E15 product:hypothetical Fibronectin type III domain/Fibronectin type III repeat containing protein, full insert sequence.	chr14:72937760:72939973:-	3	72938434-72938494,72938529-72938585,72938690-72938749
239528	Eif2c2	protein argonaute-2	chr15:72935378:72937337:-	8	72936286-72936357,72937171-72937208,72935792-72935871,72935692-72935782,72935460-72935531,72936368-72936464,72937282-72937344,72936177-72936285
382056	Crtc1	CREB-regulated transcription coactivator 1	chr8:72906257:72910022:-	1	72909128-72909171
100978	AK051057	Mus musculus 9 days embryo whole body cDNA, RIKEN full-length enriched library, clone:D030062L22 product:unclassifiable, full insert sequence.	chr5:72904543:72905396:-	1	72905059-72905105
16011	Igfbp5	Mus musculus 10 days embryo whole body cDNA, RIKEN full-length enriched library, clone:2610035E24 product:unclassifiable, full insert sequence.	chr1:72904639:72908950:-	3	72904793-72904874,72904659-72904709,72904886-72904986
66874	1200014J11Rik	RecName: Full=Uncharacterized protein C17orf85 homolog;	chr11:72892678:72897081:+	2	72893457-72893532,72895859-72895918
209416	Gpkow	G patch domain and KOW motifs-containing	chrX:7285371:7287385:+	2	7285785-7285865,7287086-7287157
19704	Upf1	regulator of nonsense transcripts 1 isoform a	chr8:72855421:72856378:-	1	72855629-72855683
272396	Tarsl2	probable threonyl-tRNA synthetase 2,	chr7:72836205:72836979:+	1	72836819-72836872
72135	Pygo1	pygopus homolog 1	chr9:72793593:72793822:+	1	72793572-72793646
74287	Kcmf1	E3 ubiquitin-protein ligase KCMF1	chr6:72791108:72792862:-	6	72791453-72791555,72792067-72792157,72791866-72791992,72792734-72792836,72791660-72791759,72792307-72792367
22327	Vbp1	prefoldin subunit 3	chrX:72779317:72780285:+	1	72779682-72779796
20687	AK047030	Mus musculus 10 days neonate cerebellum cDNA, RIKEN full-length enriched library, clone:B930012F23 product:unclassifiable, full insert sequence.	chr2:72774490:72776122:-	1	72775755-72775812
16372	Irx2	iroquois-class homeodomain protein IRX-2	chr13:72770712:72771642:+	1	72770920-72770956
107260	Otub1	ubiquitin thioesterase OTUB1	chr19:7272696:7273531:-	1	7273235-7273348
73095	Slc25a42	solute carrier family 25 member 42	chr8:72708239:72710367:-	6	72708333-72708426,72708704-72708759,72709911-72709966,72709415-72709453,72709068-72709116,72710064-72710165
234371	Tmem161a	transmembrane protein 161A precursor	chr8:72706038:72707562:+	3	72706558-72706627,72706659-72706742,72706918-72706955
210766	Brcc3	lys-63-specific deubiquitinase BRCC36	chrX:72696023:72699336:+	1	72698605-72698647
53419	Corin	atrial natriuretic peptide-converting enzyme	chr5:72691264:72692724:-	7	72691335-72691439,72691283-72691333,72691441-72691503,72692558-72692635,72691974-72692052,72692676-72692721,72692479-72692525
19727	Rfxank	DNA-binding protein RFXANK isoform 1	chr8:72654705:72657291:-	1	72656023-72656094
67391	Fundc2	FUN14 domain-containing protein 2	chrX:72639726:72641455:+	3	72639801-72639916,72639655-72639726,72639740-72639796
17999	Nedd4	SubName: Full=Neural cell expressed, developmentally down-regulted gene 4, isoform CRA_c; SubName: Full=Putative uncharacterized protein;	chr9:72595035:72597655:+	13	72595951-72596024,72595551-72595666,72595160-72595282,72596582-72596654,72596877-72596988,72595311-72595382,72595432-72595546,72596423-72596502,72596048-72596133,72597005-72597109,72597155-72597214,72595669-72595785,72595838-72595922
11736	Ankhzn	Mus musculus Ankhzn mRNA, complete cds.	chr11:72581147:72585648:+	7	72581819-72581869,72583696-72583748,72582333-72582371,72582598-72582678,72582745-72582783,72583847-72583882,72583302-72583362
21415	Tcf7l1	transcription factor 7-like 1 isoform 1	chr6:72576374:72577353:-	2	72576754-72576874,72576902-72576995
22134	Tgoln2	trans-Golgi network integral membrane protein 2	chr6:72558415:72562098:-	9	72560356-72560464,72559540-72559612,72558558-72558669,72560714-72560834,72560880-72560948,72560472-72560572,72559983-72560098,72561856-72561919,72558771-72558842
27784	Commd8	Mus musculus adult male tongue cDNA, RIKEN full-length enriched library, clone:2310010K22 product:DNA segment, Chr 5, Bucan 26 expressed, full insert sequence.	chr5:72548239:72551111:-	2	72548978-72549017,72548678-72548723
74549	Mau2	MAU2 chromatid cohesion factor homolog isoform	chr8:72542481:72543484:-	1	72542579-72542635
67128	Ube2g1	ubiquitin-conjugating enzyme E2 G1	chr11:72497026:72499983:+	6	72497411-72497466,72498332-72498379,72497624-72497711,72499617-72499668,72499403-72499447,72499710-72499809
319758	Rfx7	Mus musculus adult male corpora quadrigemina cDNA, RIKEN full-length enriched library, clone:B230306A19 product:unclassifiable, full insert sequence.	chr9:72467716:72470756:+	1	72468434-72468481
21872	Tjp1	tight junction protein ZO-1 isoform 1	chr7:72441052:72442458:-	5	72442227-72442278,72442319-72442359,72442140-72442201,72441408-72441455,72442446-72442508
234366	Gatad2a	transcriptional repressor p66 alpha isoform b	chr8:72430968:72433742:-	1	72432773-72432820
232087	Mat2a	S-adenosylmethionine synthase isoform type-2	chr6:72382793:72384286:-	2	72383787-72383895,72383958-72383996
12727	Clcn4-2	H(+)/Cl(-) exchange transporter 4	chr7:7235027:7236894:-	6	7235129-7235195,7235221-7235307,7235643-7235704,7235530-7235640,7235421-7235501,7235047-7235109
22320	Vamp8	vesicle-associated membrane protein 8	chr6:72335215:72335503:-	1	72335450-72335485
66510	Rnf181	E3 ubiquitin-protein ligase RNF181	chr6:72309708:72310576:-	1	72310102-72310143
111175	Pecr	peroxisomal trans-2-enoyl-CoA reductase	chr1:72305749:72305921:-	1	72305811-72305847
330788	Zfp866	zinc finger protein 866	chr8:72285223:72289304:-	2	72285768-72285829,72287887-72287930
235469	Suhw4	Mus musculus 9.5 days embryo parthenogenote cDNA, RIKEN full-length enriched library, clone:B130043A04 product:similar to DJ322P7.1 (ZINC FINGER) (FRAGMENT) [Homo sapiens], full insert sequence.	chr9:72210314:72211578:+	1	72211004-72211041
78785	Clip4	CAP-Gly domain-containing linker protein 4	chr17:72205889:72207691:+	7	72207427-72207465,72206159-72206262,72206264-72206358,72205929-72206020,72206818-72206935,72206938-72207048,72207471-72207544
381269	Mreg	melanoregulin	chr1:72205808:72207458:-	4	72206311-72206348,72206413-72206473,72205906-72206005,72205806-72205849
276829	Smtnl2	smoothelin-like protein 2	chr11:72203616:72204788:-	3	72203693-72203732,72203839-72203919,72203753-72203795
238247	Arid4a	SubName: Full=Putative uncharacterized protein; Flags: Fragment;	chr12:72198591:72200338:+	1	72198686-72198725
20454	St3gal5	lactosylceramide alpha-2,3-sialyltransferase	chr6:72103664:72104564:+	1	72104377-72104432
76863	Dcun1d5	DCN1-like protein 5	chr9:7206775:7207031:+	1	7206876-7206917
319710	Frmd6	FERM domain-containing protein 6	chr12:72000655:72003221:+	5	72000990-72001060,72001486-72001589,72001355-72001400,72001675-72001713,72001113-72001174
327958	Pitpnm3	membrane-associated phosphatidylinositol	chr11:71861030:71864556:-	1	71862099-71862143
76614	Immt	RecName: Full=Mitochondrial inner membrane protein; AltName: Full=Mitofilin;	chr6:71824924:71825260:+	2	71824977-71825018,71825029-71825073
66223	Mrpl35	39S ribosomal protein L35, mitochondrial	chr6:71765102:71766092:-	1	71765320-71765385
52250	Reep1	receptor expression-enhancing protein 1	chr6:71757795:71760696:+	12	71758083-71758118,71758006-71758058,71759177-71759254,71759118-71759176,71759261-71759315,71760451-71760511,71758177-71758224,71758580-71758647,71760085-71760148,71760409-71760447,71758237-71758282,71760293-71760399
228026	Pdk1	pyruvate dehydrogenase kinase, isozyme 1	chr2:71738181:71741914:+	8	71739312-71739413,71740272-71740340,71738309-71738356,71738464-71738525,71741092-71741157,71739044-71739086,71740943-71741023,71740153-71740213
16151	Ikbkg	NF-kappa-B essential modulator isoform 1	chrX:71693698:71699117:+	7	71698482-71698539,71694331-71694394,71693705-71693807,71696238-71696286,71693825-71693885,71694606-71694685,71694426-71694485
16403	Itga6	Mus musculus adult male thymus cDNA, RIKEN full-length enriched library, clone:5830464I15 product:integrin alpha 6, full insert sequence.	chr2:71693911:71694815:+	1	71694290-71694367
21406	Tcf12	transcription factor 12	chr9:71692059:71694367:-	3	71693676-71693735,71693193-71693236,71693052-71693138
11966	Atp6v1b2	V-type proton ATPase subunit B, brain isoform	chr8:71636468:71637614:+	5	71637256-71637377,71636442-71636565,71636697-71636800,71636917-71637036,71637378-71637504
108147	Atic	SubName: Full=5-aminoimidazole-4-carboxamide ribonucleotide formyltransferase/IMP cyclohydrolase; Flags: Fragment;	chr1:71625245:71625977:+	4	71625661-71625733,71625858-71625895,71625261-71625318,71625366-71625426
319263	Pcmtd1	protein-L-isoaspartate O-methyltransferase	chr1:7159963:7163709:+	3	7160570-7160658,7160311-7160364,7160388-7160427
380608	Tagap1	T-cell activation GTPase-activating protein 1	chr17:7159314:7160126:-	1	7159843-7159881
72736	Tmx1	thioredoxin-related transmembrane protein 1	chr12:71567143:71568611:+	5	71568109-71568213,71568233-71568293,71567769-71567814,71567386-71567432,71568416-71568507
14567	Gdi1	rab GDP dissociation inhibitor alpha	chrX:71556278:71557198:+	2	71556468-71556552,71556554-71556674
54411	Atp6ap1	V-type proton ATPase subunit S1 precursor	chrX:71549345:71550030:+	2	71549636-71549717,71549753-71549878
66700	Vps24	charged multivesicular body protein 3	chr6:71529786:71531568:+	5	71530519-71530564,71530850-71530958,71530347-71530422,71531197-71531310,71531041-71531118
233315	Mtmr10	Mus musculus 2 days neonate thymus thymic cells cDNA, RIKEN full-length enriched library, clone:E430024E16 product:hypothetical protein, full insert sequence.	chr7:71482915:71485692:+	1	71484977-71485024
192176	Flna	filamin-A	chrX:71468800:71469128:-	1	71468894-71468979
16880	Lifr	leukemia inhibitory factor receptor isoform 2	chr15:7141169:7147489:+	17	7145948-7146005,7145045-7145158,7144396-7144443,7141679-7141729,7142466-7142577,7141250-7141286,7145609-7145685,7142687-7142767,7143000-7143065,7145160-7145223,7146367-7146418,7144503-7144577,7144722-7144799,7142768-7142842,7141455-7141547,7142050-7142118,7141941-7141995
16956	Lpl	Mus musculus adult male kidney cDNA, RIKEN full-length enriched library, clone:0610017C21 product:lipoprotein lipase, full insert sequence.	chr8:71428405:71430831:+	11	71429098-71429172,71428481-71428582,71429810-71429907,71429994-71430119,71429650-71429735,71428798-71428865,71430452-71430575,71430311-71430436,71430210-71430310,71429908-71429993,71430576-71430702
102371	Gcom1	GRINL1A complex locus protein 1	chr9:71352154:71352939:-	4	71352528-71352643,71352345-71352462,71352207-71352329,71352647-71352755
67268	2900073G15Rik	myosin light chain, regulatory B-like	chr17:71343133:71343951:-	2	71343747-71343792,71343865-71343928
68477	Rmnd5a	protein RMD5 homolog A	chr6:71341245:71343118:-	10	71341366-71341404,71342375-71342450,71342293-71342359,71342574-71342657,71342716-71342761,71342009-71342128,71342162-71342280,71341891-71341990,71342459-71342568,71341272-71341326
28015	Grinl1a	protein GRINL1A isoform 2	chr9:71326251:71327203:-	5	71326539-71326598,71326926-71327051,71326803-71326921,71326463-71326528,71326292-71326394
17257	Mecp2	methyl-CpG-binding protein 2 isoform 2	chrX:71272161:71280755:-	16	71273446-71273495,71273736-71273794,71278016-71278115,71272198-71272274,71278747-71278786,71273523-71273590,71275330-71275401,71272313-71272374,71273614-71273732,71274952-71275016,71278573-71278686,71279467-71279516,71276492-71276535,71278402-71278476,71278313-71278396,71275427-71275479
16179	Irak1	SubName: Full=Interleukin-1 receptor associated kinase 1 splice form 1; SubName: Full=Interleukin-1 receptor-associated kinase 1; SubName: Full=Interleukin-1 receptor-associated kinase 1, isoform CRA_e;	chrX:71259257:71260778:-	2	71259649-71259751,71259473-71259535
15161	Hcfc1	host cell factor 1	chrX:71188134:71189776:-	6	71189240-71189310,71188150-71188236,71189627-71189670,71188238-71188336,71188856-71188954,71188353-71188404
12180	Smyd1	SET and MYND domain-containing protein 1 isoform	chr6:71163935:71165744:-	8	71164833-71164927,71165654-71165733,71165036-71165106,71165573-71165645,71163965-71164038,71164967-71165025,71165348-71165422,71165424-71165535
78830	Slc25a12	calcium-binding mitochondrial carrier protein	chr2:71112352:71113211:-	3	71112385-71112464,71113140-71113199,71112909-71113026
13427	Dncic2	Mus musculus cytoplasmic dynein intermediate chain 2 (Dncic2) mRNA, complete cds.	chr2:71100818:71101351:+	1	71101127-71101231
65246	Xpo7	Mus musculus mRNA for Ran binding protein 16.	chr14:71054053:71065807:-	1	71064745-71064853
245469	Pdzd4	PDZ domain-containing protein 4	chrX:71038696:71039720:-	1	71039226-71039262
50794	Klf13	Krueppel-like factor 13	chr7:71031238:71036393:-	4	71031767-71031829,71032575-71032652,71034921-71034962,71035232-71035279
15929	Idh3g	isocitrate dehydrogenase [NAD] subunit gamma 1,	chrX:71024302:71024408:-	1	71024327-71024401
15460	Hr	protein hairless	chr14:70972111:70973349:+	1	70972425-70972484
20867	Stip1	stress-induced-phosphoprotein 1	chr19:7095197:7095588:-	2	7095196-7095235,7095239-7095318
72549	Reep4	receptor expression-enhancing protein 4	chr14:70948302:70948739:+	1	70948584-70948686
27061	Bcap31	B-cell receptor-associated protein 31	chrX:70931522:70931895:-	2	70931685-70931724,70931540-70931585
102857	CRT	Mus musculus CRT mRNA for creatine transporter, complete cds.	chrX:70926439:70927837:+	4	70927343-70927419,70927634-70927694,70926981-70927103,70927227-70927290
399510	Map4k5	mitogen-activated protein kinase kinase kinase	chr12:70904744:70906250:-	1	70906052-70906102
105653	Phyhip	phytanoyl-CoA hydroxylase-interacting protein	chr14:70867142:70868631:+	2	70867206-70867248,70868150-70868217
69718	Ipmk	inositol polyphosphate multikinase	chr10:70844566:70848633:+	4	70844530-70844604,70844859-70844913,70847006-70847057,70846566-70846626
116891	Derl2	derlin-2	chr11:70820947:70823822:-	4	70821297-70821379,70821541-70821640,70821241-70821292,70821388-70821459
216877	Dhx33	Mus musculus 13 days embryo head cDNA, RIKEN full-length enriched library, clone:3110057P17 product:DEAH (Asp-Glu-Ala-His) box polypeptide 33, full insert sequence.	chr11:70797593:70800620:-	1	70798879-70798919
52637	Cisd1	CDGSH iron-sulfur domain-containing protein 1	chr10:70793242:70793784:-	1	70793573-70793646
217666	L2hgdh	L-2-hydroxyglutarate dehydrogenase,	chr12:70792281:70793287:-	2	70792254-70792333,70792339-70792453
17191	Mbd2	methyl-CpG-binding domain protein 2	chr18:70785318:70785785:+	1	70785362-70785405
54189	Rabep1	SubName: Full=Putative uncharacterized protein;	chr11:70753985:70756606:+	2	70755170-70755208,70754321-70754358
12111	Bgn	SubName: Full=Bgn protein;	chrX:70740135:70741275:+	4	70740142-70740225,70740452-70740512,70740578-70740662,70740672-70740794
216080	Ube2d1	ubiquitin-conjugating enzyme E2 D1	chr10:70717728:70718576:-	4	70717979-70718043,70717807-70717877,70718077-70718132,70718470-70718536
19895	Rpia	ribose-5-phosphate isomerase	chr6:70715714:70716547:-	1	70715770-70715856
213053	Slc39a14	zinc transporter ZIP14 isoform a	chr14:70703274:70706472:-	5	70706006-70706061,70705467-70705532,70704161-70704254,70704572-70704617,70704479-70704568
21780	Tfam	transcription factor A, mitochondrial precursor	chr10:70688225:70691306:-	1	70688595-70688638
27081	Zfp275	Zinc finger protein 275 isoform 1	chrX:70599722:70604418:+	4	70603552-70603636,70603204-70603268,70604171-70604233,70604239-70604297
74185	Gbe1	SubName: Full=Putative uncharacterized protein; Flags: Fragment;	chr16:70569290:70569961:+	1	70569659-70569752
228012	Tlk1	serine/threonine-protein kinase tousled-like 1	chr2:70550467:70552045:-	4	70551013-70551073,70550563-70550631,70550749-70550799,70550804-70550848
16562	Kif1c	kinesin-like protein KIF1C	chr11:70542381:70545472:+	15	70543119-70543169,70544022-70544083,70543279-70543372,70545290-70545398,70544668-70544731,70545018-70545087,70545228-70545284,70544583-70544620,70544954-70545005,70543000-70543061,70542924-70542997,70542592-70542647,70543178-70543225,70543919-70543965,70544907-70544945
70231	Gorasp2	Mus musculus adult male kidney cDNA, RIKEN full-length enriched library, clone:0610011A07 product:golgi reassembly stacking protein 2, full insert sequence.	chr2:70529040:70529782:+	2	70529501-70529536,70529122-70529173
216874	Camta2	calmodulin-binding transcription activator 2	chr11:70482968:70483700:-	4	70483205-70483320,70483423-70483478,70483324-70483403,70483479-70483583
11845	Arf6	ADP-ribosylation factor 6	chr12:70474308:70476967:+	1	70474539-70474574
18643	Pfn1	profilin-1	chr11:70465351:70465625:-	2	70465419-70465474,70465565-70465665
235461	mKIAA1164	Mus musculus 16 days neonate cerebellum cDNA, RIKEN full-length enriched library, clone:9630018L02 product:hypothetical ATP synthase alpha and beta subunit, central region containing protein, full insert sequence.	chr9:70446821:70452967:-	14	70448566-70448678,70452708-70452816,70450366-70450434,70449808-70449888,70452936-70452977,70448886-70448927,70449902-70449956,70451426-70451488,70448949-70448996,70452627-70452693,70447645-70447724,70449118-70449168,70449699-70449757,70448733-70448776
66660	Met	Mus musculus modulator of estrogen induced transcription (Met) mRNA, complete cds.	chr9:70439494:70440039:+	1	70439720-70439778
69554	Klhdc2	Mus musculus adult male tongue cDNA, RIKEN full-length enriched library, clone:2310022K15 product:HOST CELL FACTOR HOMOLOG LCP (CDNA FLJ10909 FIS, CLONE OVARC1000091, WEAKLY SIMILAR TO HOST CELL FACTOR C1) (HEPATOCELLULAR CARCINOMA- ASSOCIATED ANTIGEN 33) homolog [Homo sapiens], full insert sequence.	chr12:70411263:70411674:+	2	70411263-70411379,70411383-70411451
271005	Klhdc1	kelch domain-containing protein 1	chr12:70384306:70384948:+	1	70384425-70384534
93836	Arkadia	Mus musculus Arkadia (Arkadia) mRNA, complete cds.	chr9:70273236:70274796:-	1	70274035-70274090
66102	Cxcl16	C-X-C motif chemokine 16	chr11:70267736:70268905:-	1	70268140-70268179
234353	Psd3	PH and SEC7 domain-containing protein 3 isoform	chr8:70212981:70220870:-	19	70218082-70218132,70220150-70220200,70215609-70215649,70217887-70217937,70220676-70220737,70220622-70220669,70216470-70216551,70216563-70216624,70216627-70216683,70213141-70213237,70220741-70220786,70217733-70217819,70217355-70217404,70219237-70219322,70215953-70216016,70218927-70218987,70218817-70218911,70215287-70215333,70215392-70215447
26370	Cetn2	centrin-2	chrX:70158904:70159542:-	2	70158956-70158996,70159068-70159122
105513	Chmp7	charged multivesicular body protein 7	chr14:70116786:70118054:-	2	70117852-70117890,70117726-70117807
230316	Megf9	multiple epidermal growth factor-like domains	chr4:70092961:70094113:-	1	70094014-70094058
11684	Alox12	arachidonate 12-lipoxygenase, 12S-type	chr11:70054957:70055886:-	1	70055790-70055838
12029	Bcl6b	B-cell CLL/lymphoma 6 member B protein	chr11:70037630:70039528:-	2	70038934-70039047,70038349-70038408
67464	Entpd4	ectonucleoside triphosphate diphosphohydrolase	chr14:69983796:69984799:+	3	69984444-69984560,69983859-69983926,69984314-69984438
76886	Fam81a	hypothetical protein LOC76886	chr9:69937117:69938573:-	2	69938014-69938055,69937579-69937682
68795	Ubr3	SubName: Full=Novel protein containing two zinc finger domains; Flags: Fragment;	chr2:69859717:69862070:+	5	69860308-69860393,69860233-69860284,69860415-69860455,69860009-69860135,69860655-69860697
67712	Slc25a37	mitoferrin-1	chr14:69859908:69862890:-	7	69860201-69860278,69860369-69860447,69861220-69861261,69861768-69861824,69861397-69861457,69861540-69861652,69861112-69861162
12175	Bnip2	BCL2/adenovirus E1B 19 kDa protein-interacting	chr9:69854922:69856124:+	2	69855523-69855610,69855358-69855401
21413	Tcf4	Mus musculus 10 days neonate skin cDNA, RIKEN full-length enriched library, clone:4732452G07 product:transcription factor 4, full insert sequence.	chr18:69842731:69847621:+	18	69844593-69844661,69845751-69845798,69846346-69846402,69846651-69846741,69845282-69845335,69847124-69847225,69843415-69843461,69844925-69845023,69846838-69846921,69846128-69846196,69846214-69846285,69845035-69845096,69843519-69843625,69844442-69844531,69847398-69847460,69845804-69845905,69847231-69847317,69843746-69843782
20528	Slc2a4	SubName: Full=Putative uncharacterized protein; SubName: Full=Solute carrier family 2 (Facilitated glucose transporter), member 4; SubName: Full=Solute carrier family 2 (Facilitated glucose transporter), member 4, isoform CRA_b;	chr11:69755788:69756870:-	4	69756038-69756163,69756246-69756347,69756492-69756535,69756610-69756721
66859	Slc16a9	monocarboxylate transporter 9	chr10:69746803:69748699:+	1	69746952-69746996
276770	Eif5a	eukaryotic translation initiation factor 5A-1	chr11:69730224:69730843:-	1	69730443-69730481
20823	Ssb	lupus La protein homolog	chr2:69709267:69709903:+	3	69709296-69709349,69709379-69709422,69709505-69709543
277396	Klhl23	kelch-like protein 23	chr2:69672042:69674705:+	3	69673088-69673150,69673853-69673912,69671969-69672061
216856	Nlgn2	neuroligin-2 precursor	chr11:69636625:69638704:-	1	69638248-69638303
75580	Zbtb4	SubName: Full=Zinc finger and BTB domain containing 4;	chr11:69592903:69597528:+	1	69595009-69595089
228005	Ppig	RecName: Full=Peptidyl-prolyl cis-trans isomerase; EC=5.2.1.8; Flags: Fragment;	chr2:69588439:69592116:+	2	69588516-69588573,69588609-69588659
22779	Ikzf2	zinc finger protein Helios	chr1:69577784:69585341:-	6	69578041-69578093,69581033-69581071,69579799-69579857,69583886-69583930,69578125-69578162,69580804-69580899
17984	Ndn	necdin	chr7:69494271:69494813:+	1	69494558-69494596
11735	AK029407	Mus musculus 0 day neonate head cDNA, RIKEN full-length enriched library, clone:4833431D13 product:hypothetical protein, full insert sequence.	chr10:69486580:69490184:+	1	69488465-69488524
11932	Atp1b2	sodium/potassium-transporting ATPase subunit	chr11:69413252:69414749:-	2	69413620-69413660,69413355-69413418
13643	Efnb3	ephrin-B3 precursor	chr11:69367595:69369361:-	4	69368644-69368709,69368842-69368966,69368170-69368255,69368040-69368161
242083	Ppm1l	protein phosphatase 1L	chr3:69357096:69359318:+	4	69357577-69357643,69357257-69357317,69358812-69358853,69358721-69358786
12306	Anxa2	annexin A2	chr9:69339312:69339592:+	1	69339516-69339569
216850	Kdm6b	lysine-specific demethylase 6B	chr11:69212020:69213327:-	1	69212565-69212619
241447	Lass6	LAG1 longevity assurance homolog 6	chr2:68946651:68949347:+	5	68946901-68946943,68946788-68946828,68947077-68947134,68946956-68947016,68949276-68949311
13992	Khdrbs3	KH domain-containing, RNA-binding, signal	chr15:68923422:68923948:+	1	68923564-68923615
22318	Vamp2	vesicle-associated membrane protein 2	chr11:68904168:68905883:+	4	68904731-68904831,68904343-68904467,68904219-68904322,68904613-68904670
16649	Kpna4	importin subunit alpha-4	chr3:68876143:68878010:-	3	68876461-68876508,68877072-68877146,68876810-68876922
76142	Ppp1r14c	protein phosphatase 1 regulatory subunit 14C	chr10:6881566:6883077:-	4	6882905-6882984,6882743-6882814,6882393-6882468,6882531-6882619
69288	Rhobtb1	rho-related BTB domain-containing protein 1	chr10:68752437:68754532:+	8	68753941-68753983,68754247-68754310,68753620-68753727,68753826-68753940,68753264-68753317,68754158-68754218,68753338-68753453,68753454-68753510
68259	Ift80	intraflagellar transport protein 80 homolog	chr3:68696433:68697992:-	2	68697630-68697669,68696612-68696661
171486	Cd99l2	CD99 antigen-like protein 2 isoform 1	chrX:68673245:68675859:-	7	68675674-68675770,68673246-68673358,68674394-68674470,68674793-68674855,68675401-68675447,68674549-68674611,68674292-68674336
53332	Mtmr1	Mus musculus myotubularin related protein 1 isoform A (Mtmr1) mRNA, complete cds; alternatively spliced.	chrX:68669902:68672371:+	2	68670079-68670154,68670443-68670502
83431	Ndel1	nuclear distribution protein nudE-like 1	chr11:68634951:68636073:-	4	68635501-68635545,68635684-68635765,68635399-68635446,68635587-68635623
77579	Myh10	SubName: Full=Myosin, heavy polypeptide 10, non-muscle; SubName: Full=Putative uncharacterized protein;	chr11:68628573:68630126:+	1	68628979-68629018
17772	Mtm1	myotubularin isoform 3	chrX:68566988:68568470:+	2	68567738-68567789,68567880-68567943
30953	Schip1	schwannomin-interacting protein 1 isoform c	chr3:68429780:68430404:+	3	68430121-68430157,68430015-68430120,68429818-68429920
108654	4933403F05Rik	hypothetical protein LOC108654	chr18:68419839:68428372:-	15	68422446-68422540,68427545-68427618,68423527-68423645,68423291-68423346,68426512-68426625,68426658-68426742,68427199-68427290,68427069-68427154,68421585-68421655,68425457-68425503,68421258-68421333,68426902-68426976,68422299-68422343,68428030-68428100,68424823-68424930
105440	Kctd9	BTB/POZ domain-containing protein KCTD9 isoform	chr14:68358469:68360367:+	6	68360145-68360181,68358862-68358921,68359578-68359683,68358666-68358745,68359685-68359759,68359493-68359573
53416	Stk39	STE20/SPS1-related proline-alanine-rich protein	chr2:68048504:68049975:-	3	68049553-68049597,68049019-68049082,68049905-68049971
18208	Ntn1	netrin-1 precursor	chr11:68022866:68026507:-	6	68022933-68022974,68024831-68024932,68023228-68023282,68024777-68024823,68025223-68025311,68023078-68023195
11980	Atp8a1	probable phospholipid-transporting ATPase IA	chr5:68009380:68013837:-	8	68012985-68013038,68012860-68012975,68010177-68010236,68009436-68009514,68013274-68013374,68010452-68010567,68013058-68013159,68012725-68012841
26877	B3galt1	beta-1,3-galactosyltransferase 1	chr2:67956980:67960746:+	1	67959205-67959260
72124	Seh1l	nucleoporin SEH1 isoform b	chr18:67952816:67955141:+	2	67954304-67954367,67954813-67954880
19330	Rab18	ras-related protein Rab-18	chr18:6788653:6790229:+	8	6788959-6789047,6789547-6789592,6789895-6789936,6788827-6788910,6789447-6789540,6789184-6789232,6789937-6789987,6789233-6789342
19255	Ptpn2	tyrosine-protein phosphatase non-receptor type 2	chr18:67825155:67832226:-	2	67828601-67828638,67825548-67825626
107047	Psmg2	proteasome assembly chaperone 2	chr18:67813632:67813816:+	1	67813601-67813711
225659	Cep76	centrosomal protein of 76 kDa	chr18:67777051:67778887:-	1	67777576-67777624
109108	Slc30a9	zinc transporter 9	chr5:67745815:67747384:+	4	67746218-67746270,67746422-67746465,67746487-67746555,67745934-67746000
67878	Tmem33	transmembrane protein 33 isoform 2	chr5:67677464:67682700:+	4	67677976-67678063,67677846-67677888,67677771-67677832,67679250-67679336
68166	AK053505	Mus musculus 0 day neonate eyeball cDNA, RIKEN full-length enriched library, clone:E130103J24 product:unclassifiable, full insert sequence.	chr18:67647863:67650944:-	1	67650605-67650648
71978	Ppp2r2a	serine/threonine-protein phosphatase 2A 55 kDa	chr14:67634508:67635210:-	1	67634937-67634977
170763	Zfp87	zinc finger protein 87	chr13:67616718:67617654:-	1	67616741-67616796
12177	Bnip3l	BCL2/adenovirus E1B 19 kDa protein-interacting	chr14:67604077:67606563:-	4	67605401-67605450,67605811-67605860,67605626-67605668,67605265-67605321
15931	Ids	iduronate 2-sulfatase isoform a	chrX:67596245:67599375:-	8	67597854-67597889,67598993-67599039,67597168-67597218,67599233-67599281,67596352-67596419,67598051-67598170,67597307-67597392,67597549-67597592
71371	Arid5b	AT-rich interactive domain-containing protein	chr10:67558341:67559251:-	3	67558447-67558558,67558642-67558693,67558559-67558617
78757	Rictor	SubName: Full=Putative uncharacterized protein;	chr15:6746236:6750400:+	3	6747697-6747738,6747291-6747386,6748296-6748356
77569	Limch1	SubName: Full=Putative uncharacterized protein Limch1;	chr5:67445500:67448398:+	13	67447953-67447991,67447619-67447676,67446911-67447025,67446371-67446417,67445801-67445842,67445649-67445692,67446169-67446220,67446011-67446119,67446121-67446163,67447077-67447146,67446578-67446669,67445849-67445924,67447541-67447604
12934	Dpysl2	dihydropyrimidinase-related protein 2	chr14:67421701:67424181:-	11	67422583-67422707,67422894-67422992,67423300-67423339,67421971-67422019,67421842-67421952,67422387-67422452,67422024-67422104,67423025-67423063,67423431-67423508,67422209-67422276,67423203-67423273
67064	Chmp1b	charged multivesicular body protein 1b-1	chr18:67365754:67366655:+	1	67366304-67366339
11549	Adra1a	SubName: Full=Putative uncharacterized protein;	chr14:67350401:67352166:+	5	67351355-67351429,67351881-67351933,67351748-67351815,67351198-67351301,67351431-67351476
66870	Serbp1	plasminogen activator inhibitor 1 RNA-binding	chr6:67233953:67239296:+	15	67237028-67237087,67235821-67235876,67237233-67237296,67236877-67236996,67237655-67237701,67235948-67236012,67235434-67235555,67234865-67234910,67235678-67235740,67237511-67237627,67237399-67237440,67234760-67234818,67235573-67235631,67236398-67236454,67234093-67234209
66234	Sc4mol	C-4 methylsterol oxidase	chr8:67196942:67197782:-	1	67196998-67197042
20646	Snrpn	small nuclear ribonucleoprotein-associated	chr7:67127388:67128125:-	1	67128033-67128092
19210	Ptdss1	phosphatidylserine synthase 1	chr13:67098013:67099337:+	6	67098646-67098707,67097995-67098052,67098576-67098620,67098723-67098838,67098212-67098273,67098415-67098485
12876	Cpe	carboxypeptidase E precursor	chr8:67071349:67071919:-	4	67071363-67071477,67071593-67071666,67071825-67071891,67071479-67071578
70549	Tln2	SubName: Full=Tln2 protein; Flags: Fragment;	chr9:67064892:67069196:-	1	67066601-67066669
14768	Lancl1	Mus musculus mRNA for LanC-like protein 1 (Lancl1 gene).	chr1:67047091:67050054:-	1	67049084-67049137
19274	Ptprm	receptor-type tyrosine-protein phosphatase mu	chr17:67016189:67016967:-	2	67016399-67016485,67016565-67016666
211488	Ado	2-aminoethanethiol dioxygenase	chr10:67007261:67010750:-	4	67009687-67009759,67008696-67008784,67009630-67009685,67007837-67007888
14701	Gng12	guanine nucleotide-binding protein	chr6:66967583:66971288:+	6	66969813-66969894,66971027-66971064,66969914-66969981,66971110-66971149,66970942-66971025,66969998-66970057
20442	St3gal1	CMP-N-acetylneuraminate-beta-galactosamide-	chr15:66934437:66938218:-	5	66937054-66937095,66935864-66935914,66936998-66937049,66936947-66936996,66934565-66934603
66854	Trim35	tripartite motif-containing protein 35	chr14:66928173:66930261:+	8	66929784-66929902,66928186-66928274,66928378-66928484,66930185-66930229,66929442-66929548,66929669-66929781,66928278-66928346,66929045-66929167
11363	Acadl	long-chain specific acyl-CoA dehydrogenase,	chr1:66877427:66878007:-	1	66877871-66877937
66358	2310004I24Rik	manganese-dependent ADP-ribose/CDP-alcohol	chr11:66851382:66851642:-	1	66851484-66851537
19328	Rab12	ras-related protein Rab-12	chr17:66843852:66845029:-	2	66843889-66843988,66844558-66844593
19229	Ptk2b	protein-tyrosine kinase 2-beta isoform 3	chr14:66772094:66772890:-	1	66772169-66772209
193003	Pirt	phosphoinositide-interacting protein	chr11:66739774:66742202:+	1	66741501-66741538
235442	Rab8B	Mus musculus Rab8B mRNA for Rab8B, complete cds.	chr9:66691471:66695525:-	1	66694803-66694843
208117	Aph1b	gamma-secretase subunit APH-1B	chr9:66623294:66627019:-	3	66624874-66624932,66624563-66624615,66623931-66623996
12759	Clu	clusterin precursor	chr14:66600154:66600382:+	1	66600143-66600212
18616	Peg3	paternally expressed 3	chr7:6658671:6660216:-	3	6659019-6659082,6658945-6658993,6659415-6659469
22215	Ube3a	SubName: Full=Putative uncharacterized protein; SubName: Full=Ubiquitin protein ligase E3A;	chr7:66560300:66562097:+	8	66560517-66560574,66561498-66561564,66561068-66561139,66560403-66560456,66561840-66561933,66561238-66561319,66560705-66560765,66560933-66561054
20272	Scn7a	Mus musculus 0 day neonate lung cDNA, RIKEN full-length enriched library, clone:E030020L17 product:sodium channel, voltage-gated, type VI, alpha polypeptide, full insert sequence.	chr2:66511483:66513554:-	1	66511932-66511981
67179	Ccdc25	coiled-coil domain-containing protein 25	chr14:66483996:66485441:+	4	66485356-66485404,66485288-66485334,66484951-66485019,66484842-66484931
28193	Reep3	receptor expression-enhancing protein 3	chr10:66474256:66476477:-	4	66475772-66475817,66476216-66476307,66475835-66475914,66475699-66475766
239510	Phf20l1	PHD finger protein 20-like protein 1	chr15:66473502:66476817:+	3	66475528-66475593,66476040-66476102,66476415-66476470
106585	Ankrd12	ankyrin repeat domain 12	chr17:66316841:66319491:-	2	66318851-66318907,66317617-66317653
65960	Twsg1	twisted gastrulation protein homolog 1	chr17:66272406:66275624:-	11	66273699-66273754,66274413-66274476,66274816-66274898,66274308-66274387,66274935-66274975,66275284-66275366,66275474-66275526,66273572-66273694,66273340-66273386,66275529-66275600,66274732-66274802
320924	Ccbe1	collagen and calcium-binding EGF	chr18:66216510:66220940:-	1	66220403-66220463
19765	Ralbp1	ralA-binding protein 1	chr17:66197771:66199289:-	1	66198083-66198173
30795	Fkbp3	peptidyl-prolyl cis-trans isomerase FKBP3	chr12:66163419:66163672:-	1	66163454-66163562
74195	Elp3	elongator complex protein 3	chr14:66149293:66150360:-	6	66149443-66149508,66149782-66149874,66149674-66149741,66150160-66150215,66149328-66149405,66149616-66149673
70361	Lman1	protein ERGIC-53 precursor	chr18:66140408:66142364:-	6	66140454-66140523,66142189-66142267,66141541-66141597,66141655-66141714,66142108-66142156,66140998-66141056
66689	Klhl28	kelch-like protein 28	chr12:66043427:66044436:-	1	66043736-66043806
380702	Shisa6	protein shisa-6 homolog precursor	chr11:66025231:66030973:-	2	66027391-66027434,66029770-66029830
380912	Zfp395	zinc finger protein 395	chr14:66015167:66017767:+	3	66016967-66017024,66017566-66017602,66016831-66016931
106572	Rab22B	Mus musculus Rab22B mRNA for Rab22B, complete cds.	chr17:66001066:66003745:-	1	66001687-66001743
53323	Ube2k	ubiquitin-conjugating enzyme E2 K	chr5:65986188:65990228:+	1	65986571-65986632
14265	Fmr1	Mus musculus fragile X mental retardation protein FMRP mRNA, complete cds, alternatively spliced.	chrX:65968850:65971136:+	1	65969255-65969301
30960	Vapa	vesicle-associated membrane protein-associated	chr17:65929395:65930028:-	2	65929898-65929990,65929457-65929508
214897	Csnk1g1	Mus musculus adult pancreas islet cells cDNA, RIKEN full-length enriched library, clone:C820002C04 product:casein kinase 1, gamma 1, full insert sequence.	chr9:65887438:65892821:+	3	65888043-65888102,65890825-65890862,65889317-65889353
328977	Zfp532	zinc finger protein 532	chr18:65847110:65848587:+	3	65847342-65847439,65847211-65847268,65848347-65848432
68552	1110003E01Rik	hypothetical protein LOC68552	chr5:65839994:65841643:-	8	65840680-65840731,65840102-65840153,65841326-65841382,65841468-65841515,65840862-65840919,65841541-65841604,65840935-65840994,65841390-65841432
14365	Fzd3	frizzled-3 precursor	chr14:65811278:65821555:-	2	65811484-65811523,65813817-65813860
22235	Ugdh	UDP-glucose 6-dehydrogenase	chr5:65804461:65805194:-	1	65804553-65804604
56421	Pfkp	6-phosphofructokinase type C	chr13:6579120:6580705:-	1	6580431-6580488
76740	KIAA0143	Mus musculus KIAA0143 mRNA for similar to conserved membrane protein at 44E, complete cds.	chr15:65702820:65705374:+	11	65703229-65703286,65705231-65705270,65704060-65704120,65703485-65703542,65703920-65703977,65705019-65705139,65703390-65703477,65703832-65703895,65704609-65704679,65704833-65704899,65703771-65703831
54616	Extl3	exostosin-like 3	chr14:65670900:65673449:-	7	65671229-65671294,65672618-65672670,65673337-65673376,65671925-65672018,65672304-65672405,65672215-65672270,65671700-65671815
68169	A930038C07Rik	fibronectin type-III domain-containing protein	chr6:65654439:65656924:+	1	65654882-65654919
214812	Zfp609	zinc finger protein 609	chr9:65539390:65543501:-	11	65541514-65541557,65539460-65539518,65541563-65541642,65540323-65540404,65541288-65541371,65542169-65542262,65541151-65541227,65540608-65540655,65541744-65541810,65541245-65541287,65542057-65542157
68942	Chmp2b	charged multivesicular body protein 2b	chr16:65539378:65540384:-	3	65540078-65540118,65539378-65539439,65539929-65540016
18247	Oaz2-ps	ornithine decarboxylase antizyme 2	chr9:65537032:65538107:+	2	65537443-65537504,65537573-65537634
71973	Rbpms	SubName: Full=Putative uncharacterized protein;	chr9:65507245:65508325:+	3	65507535-65507615,65508094-65508149,65508179-65508224
26398	Map2k4	dual specificity mitogen-activated protein	chr11:65501746:65504192:-	8	65502942-65503033,65503507-65503543,65504017-65504082,65504167-65504278,65501878-65501931,65503332-65503388,65502352-65502469,65503068-65503173
219150	Hmbox1	homeobox-containing protein 1	chr14:65441055:65442397:-	3	65442240-65442303,65441490-65441563,65442009-65442059
68303	Fam114a1	SubName: Full=Putative uncharacterized protein Fam114a1;	chr5:65431979:65433140:+	1	65432261-65432305
83814	mKIAA0439	Mus musculus ubiquitin-protein ligase Nedd4-2 mRNA, complete cds.	chr18:65372540:65377480:+	8	65373958-65374021,65376556-65376647,65376365-65376464,65372768-65372812,65375342-65375404,65375430-65375487,65373802-65373851,65376496-65376549
18711	Pikfyve	RecName: Full=1-phosphatidylinositol-3-phosphate 5-kinase; Short=Phosphatidylinositol-3-phosphate 5-kinase; EC=2.7.1.150; AltName: Full=FYVE finger-containing phosphoinositide kinase; AltName: Full=PIKfyve; AltName: Full=Phosphatidylinositol-3-phosphate 5-kinase type III; Short=PIPkin-III; Short=Type III PIP kinase; AltName: Full=p235;	chr1:65320332:65325270:+	3	65320711-65320764,65321860-65321910,65322353-65322402
69807	Trim32	E3 ubiquitin-protein ligase TRIM32	chr4:65276209:65277274:+	4	65276632-65276710,65276343-65276396,65276229-65276306,65276499-65276571
15926	Idh1	isocitrate dehydrogenase [NADP] cytoplasmic	chr1:65205190:65206038:-	4	65205501-65205569,65205573-65205678,65205765-65205819,65205311-65205361
67437	Ssr3	translocon-associated protein subunit gamma	chr3:65183579:65185889:-	6	65184231-65184293,65183866-65183942,65183946-65184066,65184067-65184148,65184767-65184837,65184528-65184639
66631	Hiatl1	hippocampus abundant transcript-like 1	chr13:65166338:65167920:-	3	65167739-65167786,65167483-65167574,65166891-65167007
21379	Tbrg4	protein TBRG4	chr11:6515601:6516615:-	1	6515621-6515658
17158	Man2a1	Mus musculus lung RCB-0558 LLC cDNA, RIKEN full-length enriched library, clone:G730030D07 product:mannosidase 2, alpha 1, full insert sequence.	chr17:65101912:65104450:+	1	65101984-65102049
13990	mKIAA1122	Mus musculus 10 days embryo whole body cDNA, RIKEN full-length enriched library, clone:2610039N20 product:ENHANCER TRAP LOCUS 1 (ENHANCER-TRAP-LOCUS 1 PROTEIN) (FRAGMENT) homolog [Mus musculus], full insert sequence.	chr6:65064356:65066043:+	1	65064899-65064961
214384	BSAC2A	Mus musculus transcription factor myocardin mRNA, complete cds.	chr11:64990072:64991946:-	5	64990189-64990242,64991527-64991600,64991660-64991703,64990509-64990611,64991461-64991523
56741	DDM36	Mus musculus DDM36 mRNA, complete cds.	chr9:64983335:64985750:+	6	64984043-64984128,64985401-64985502,64983937-64984002,64983720-64983755,64983505-64983609,64984869-64984950
319876	Cobll1	cordon-bleu protein-like 1 isoform 2	chr2:64926396:64927527:-	1	64927321-64927359
106143	Cggbp1	CGG triplet repeat-binding protein 1	chr16:64855902:64859317:+	6	64858020-64858085,64856151-64856212,64858411-64858474,64858243-64858297,64859043-64859098,64858103-64858161
241075	Plekhm3	pleckstrin homology domain-containing family M	chr1:64835695:64841610:-	6	64837367-64837405,64835870-64835973,64840034-64840086,64837289-64837356,64839360-64839411,64837170-64837213
57874	Ptplad1	3-hydroxyacyl-CoA dehydratase 3	chr9:64834790:64836259:-	5	64834927-64834977,64835480-64835529,64835346-64835432,64834817-64834890,64836125-64836202
216831	Arhgap44	rho GTPase-activating protein RICH2 isoform 2	chr11:64815541:64816952:-	1	64815598-64815639
14367	Fzd5	frizzled-5 precursor	chr1:64777132:64781416:-	2	64781377-64781423,64780910-64780963
227210	Ccnyl1	cyclin Y-like 1	chr1:64770213:64772216:+	2	64771083-64771132,64771021-64771068
57915	mKIAA1108	Mus musculus 7 days neonate cerebellum cDNA, RIKEN full-length enriched library, clone:A730073O03 product:hypothetical protein, full insert sequence.	chr5:64741169:64742725:+	1	64741813-64741853
110265	Msra	peptide methionine sulfoxide reductase	chr14:64741462:64742025:-	1	64741556-64741612
14007	Celf2	CUGBP Elav-like family member 2 isoform 2	chr2:6460744:6468131:-	25	6466959-6467017,6464622-6464662,6466558-6466661,6465060-6465106,6460882-6460932,6465345-6465447,6463441-6463492,6465885-6466009,6464484-6464598,6465730-6465790,6464843-6464894,6462924-6463038,6464257-6464320,6466060-6466131,6466664-6466775,6465145-6465202,6462766-6462871,6465654-6465727,6463136-6463227,6464329-6464418,6463722-6463791,6463559-6463674,6465580-6465648,6464084-6464128,6465454-6465518
70223	Nars	asparaginyl-tRNA synthetase, cytoplasmic isoform	chr18:64659307:64660171:-	1	64659339-64659389
67099	Fam119a	hypothetical protein LOC67099	chr1:64653054:64654313:-	3	64653867-64653959,64653762-64653807,64654045-64654092
12912	Creb1	cyclic AMP-responsive element-binding protein 1	chr1:64643952:64651122:+	7	64645507-64645558,64646325-64646384,64647417-64647483,64646885-64646951,64645432-64645472,64647957-64648013,64647305-64647391
224938	Pja2	E3 ubiquitin-protein ligase Praja-2 isoform a	chr17:64630355:64632761:-	10	64631063-64631137,64630524-64630600,64630883-64630970,64631794-64631895,64632447-64632527,64631239-64631359,64631965-64632082,64631404-64631486,64631675-64631773,64631146-64631236
14151	Fech	ferrochelatase, mitochondrial	chr18:64616204:64617736:-	3	64617153-64617247,64617255-64617308,64617521-64617593
20680	Sox7	transcription factor SOX-7	chr14:64567496:64569569:+	1	64568378-64568425
53869	Rab11a	ras-related protein Rab-11A	chr9:64563107:64564655:-	7	64563343-64563412,64564648-64564711,64563776-64563839,64563160-64563211,64563920-64564036,64563666-64563721,64564533-64564643
216033	Ctnna3	catenin alpha-3 isoform 1	chr10:64465581:64466415:+	5	64466038-64466098,64466109-64466154,64466159-64466217,64465696-64465788,64466283-64466401
13831	Epc1	enhancer of polycomb homolog 1 isoform 2	chr18:6435949:6437232:-	4	6436353-6436405,6436707-6436826,6436913-6436959,6436435-6436495
218294	Cdc14b	dual specificity protein phosphatase CDC14B	chr13:64293853:64297983:-	4	64297584-64297640,64297278-64297331,64296772-64296835,64296840-64296922
56541	Habp4	intracellular hyaluronan-binding protein 4	chr13:64286637:64287845:+	1	64286752-64286792
238673	Zfp367	zinc finger protein 367	chr13:64234365:64236621:-	6	64235059-64235131,64235412-64235466,64235562-64235604,64235803-64235863,64235653-64235714,64234923-64234993
210376	Mtmr9	myotubularin-related protein 9	chr14:64142447:64142902:-	1	64142480-64142515
26395	Map2k1	dual specificity mitogen-activated protein	chr9:64033600:64034491:-	4	64033952-64033992,64034233-64034325,64033896-64033941,64034381-64034462
19309	Pygm	glycogen phosphorylase, muscle form	chr19:6398194:6398459:+	2	6398164-6398288,6398289-6398415
13132	Dab2	Mus musculus adult male kidney cDNA, RIKEN full-length enriched library, clone:0610039N04 product:disabled homolog 2 (Drosophila), full insert sequence.	chr15:6388782:6390709:+	3	6389023-6389081,6388959-6389005,6388866-6388931
229363	Gmps	GMP synthase [glutamine-hydrolyzing]	chr3:63820656:63823000:+	4	63822707-63822755,63822192-63822247,63822297-63822376,63822099-63822173
53382	Txnl1	thioredoxin-like protein 1	chr18:63822455:63823956:-	2	63822480-63822523,63823805-63823844
14463	Gata4	transcription factor GATA-4	chr14:63817752:63819211:-	2	63817852-63817927,63818797-63818920
60344	Fign	fidgetin	chr2:63815418:63816701:-	2	63815974-63816021,63816284-63816373
213783	Plekhg1	pleckstrin homology domain containing, family G	chr10:6379241:6382088:-	1	6379521-6379592
22668	AK140725	Mus musculus adult male corpus striatum cDNA, RIKEN full-length enriched library, clone:C030033G23 product:unclassifiable, full insert sequence.	chr19:6375995:6378038:+	6	6376897-6377004,6376420-6376465,6376107-6376145,6376191-6376273,6376514-6376591,6377005-6377059
223601	Fam49b	hypothetical protein LOC223601	chr15:63760650:63763170:-	4	63762290-63762326,63762525-63762622,63762230-63762286,63763032-63763080
13030	Ctsb	cathepsin B preproprotein	chr14:63761166:63764758:+	9	63761264-63761383,63761675-63761740,63762898-63763001,63763454-63763503,63761394-63761500,63761741-63761786,63761809-63761928,63762624-63762706,63761929-63762031
17127	Smad3	mothers against decapentaplegic homolog 3	chr9:63494574:63498068:-	2	63495136-63495236,63495338-63495454
12725	Clcn3	H(+)/Cl(-) exchange transporter 3 isoform c	chr8:63389186:63391881:-	4	63391833-63391878,63390898-63390961,63389277-63389336,63391300-63391374
230279	6330416G13Rik	Mus musculus adult male pituitary gland cDNA, RIKEN full-length enriched library, clone:5330415O11 product:hypothetical Mitochondrial energy transfer proteins (carrier protein) containing protein, full insert sequence.	chr4:63244999:63247387:+	7	63245898-63245956,63246550-63246608,63245974-63246024,63247311-63247372,63245209-63245257,63246840-63246894,63246191-63246255
233280	Nipa1	magnesium transporter NIPA1	chr7:63233854:63234761:-	1	63234339-63234381
53378	Sdcbp	Mus musculus scaffold protein Pbp1 homolog mRNA, complete cds.	chr4:6321711:6323269:+	6	6321882-6321933,6321759-6321821,6322127-6322197,6322215-6322260,6321991-6322117,6322352-6322440
227197	Ndufs1	NADH-ubiquinone oxidoreductase 75 kDa subunit,	chr1:63190167:63190404:-	1	63190198-63190279
93790	Nipa2	magnesium transporter NIPA2	chr7:63186957:63188285:-	2	63186983-63187030,63187136-63187202
20430	Cyfip1	cytoplasmic FMR1-interacting protein 1 isoform	chr7:63185532:63188003:+	1	63185891-63185928
108123	Napg	gamma-soluble NSF attachment protein	chr18:63156614:63159104:+	2	63158763-63158806,63157230-63157283
71306	Mfap3l	microfibrillar-associated protein 3-like	chr8:63150752:63151546:+	4	63151067-63151129,63151246-63151281,63151162-63151217,63151303-63151349
227195	Ino80d	INO80 complex subunit D isoform 2	chr1:63094375:63104556:-	11	63099716-63099765,63095799-63095850,63103467-63103519,63095723-63095779,63101958-63102012,63102095-63102141,63104087-63104131,63099614-63099715,63098403-63098447,63102027-63102080,63103930-63104029
52915	Zmiz2	zinc finger MIZ domain-containing protein 2	chr11:6305100:6306165:+	2	6305390-6305501,6305989-6306031
13660	Ehd1	EH domain-containing protein 1	chr19:6298598:6300096:+	1	6299067-6299115
18858	Pmp22	peripheral myelin protein 22	chr11:62971917:62973048:+	2	62972267-62972327,62972140-62972204
13640	Efna5	ephrin-A5 isoform 1	chr17:62952306:62956690:-	6	62954723-62954775,62952496-62952552,62953487-62953526,62953213-62953270,62953964-62954016,62953649-62953718
19128	Pros1	vitamin K-dependent protein S precursor	chr16:62928019:62929166:+	1	62928425-62928473
30045	Dnajc12	dnaJ homolog subfamily C member 12	chr10:62871031:62871569:+	2	62871157-62871256,62871097-62871142
18187	Nrp2	SubName: Full=Putative uncharacterized protein;	chr1:62862211:62865266:+	1	62862252-62862309
68146	Arl13b	ADP-ribosylation factor-like protein 13B	chr16:62793515:62795457:-	2	62794937-62794981,62793988-62794060
93759	Sirt1	NAD-dependent deacetylase sirtuin-1 isoform 1	chr10:62781755:62783383:-	1	62781847-62781899
56469	Pias1	Mus musculus protein inhibitor of activated STAT protein PIAS1 mRNA, complete cds.	chr9:62727884:62729774:-	8	62728007-62728076,62729333-62729377,62729041-62729099,62729262-62729312,62728200-62728286,62727920-62727991,62728871-62728937,62729117-62729232
67510	Fam18b	hypothetical protein LOC67510	chr11:62707650:62708686:+	3	62707760-62707864,62707677-62707749,62707909-62708001
72823	Pard3b	Mus musculus adult male small intestine cDNA, RIKEN full-length enriched library, clone:2010002N16 product:unclassifiable, full insert sequence.	chr1:62684497:62688858:+	2	62685440-62685477,62685535-62685597
12421	Rb1cc1	RB1-inducible coiled-coil protein 1	chr1:6264356:6266185:+	2	6264424-6264485,6264733-6264772
14155	Fem1b	protein fem-1 homolog B	chr9:62639636:62643899:-	8	62642277-62642344,62643399-62643438,62643274-62643323,62639927-62639998,62641601-62641664,62640294-62640365,62643528-62643620,62642573-62642648
18293	mKIAA4192	Mus musculus 2 days neonate thymus thymic cells cDNA, RIKEN full-length enriched library, clone:E430020N12 product:oxoglutarate dehydrogenase (lipoamide) (EC 1.2.4.2) E1 component (fragment) homolog [Mus musculus], full insert sequence.	chr11:6255677:6259096:+	6	6256103-6256210,6255649-6255706,6256212-6256333,6255740-6255848,6256335-6256429,6255978-6256099
227960	Gca	grancalcin	chr2:62529647:62532166:+	6	62530659-62530726,62530165-62530224,62529875-62529928,62529945-62529991,62530021-62530098,62530288-62530389
70432	Rufy2	SubName: Full=Putative uncharacterized protein Rufy2;	chr10:62474481:62481490:+	1	62475522-62475559
73132	Slc25a16	graves disease carrier protein homolog	chr10:62407219:62409242:+	4	62407441-62407489,62408656-62408715,62407260-62407312,62407952-62408015
68842	Tulp4	Mus musculus adult male stomach cDNA, RIKEN full-length enriched library, clone:2210038L17 product:unclassifiable, full insert sequence.	chr17:6236342:6240637:+	4	6239443-6239507,6238606-6238659,6238311-6238362,6237223-6237273
72162	Dhx36	probable ATP-dependent RNA helicase DHX36	chr3:62272564:62274483:-	1	62273391-62273442
235431	Coro2b	coronin-2B	chr9:62267299:62269088:-	1	62268962-62268999
11737	Anp32a	acidic leucine-rich nuclear phosphoprotein 32	chr9:62225422:62226609:+	3	62225626-62225743,62226429-62226513,62225511-62225567
66674	6330409N04Rik	chronic lymphocytic leukemia deletion region	chr14:62153142:62153980:-	3	62153514-62153616,62153431-62153505,62153238-62153314
20185	Ncor1	nuclear receptor corepressor 1	chr11:62130192:62131344:-	1	62131000-62131052
72795	Ttc19	SubName: Full=Putative uncharacterized protein;	chr11:62127645:62129926:+	2	62128835-62128896,62127661-62127782
70052	Prpf4	U4/U6 small nuclear ribonucleoprotein Prp4	chr4:62084445:62088024:+	1	62084785-62084832
94213	Ddx50	Mus musculus nucleolar protein GU2 mRNA, complete cds.	chr10:62078771:62078985:-	1	62078936-62078982
20529	Slc31a1	high affinity copper uptake protein 1	chr4:62049833:62052802:+	2	62050584-62050636,62050126-62050222
56200	Ddx21	nucleolar RNA helicase 2	chr10:62042995:62045097:-	4	62043472-62043587,62044271-62044328,62044402-62044464,62043075-62043122
16573	Kif5b	kinesin-1 heavy chain	chr18:6202224:6203705:-	3	6202786-6202823,6203555-6203622,6203369-6203437
16648	Kpna3	importin subunit alpha-3	chr14:61984023:61986467:-	5	61985065-61985119,61984826-61984922,61984076-61984124,61984477-61984548,61984731-61984825
319713	Ablim3	actin-binding LIM protein 3	chr18:61959049:61960948:-	1	61960728-61960775
30930	Vps26a	vacuolar protein sorting-associated protein 26A	chr10:61917591:61919492:-	2	61918386-61918426,61919063-61919101
93683	Glce	D-glucuronyl C5-epimerase	chr9:61905056:61907817:-	2	61905423-61905466,61905317-61905407
106877	Afap1l1	actin filament-associated protein 1-like 1	chr18:61889916:61890940:-	1	61890393-61890435
24053	Sgcg	gamma-sarcoglycan	chr14:61837952:61840439:-	4	61840434-61840512,61838034-61838112,61838124-61838170,61839404-61839474
93687	Csnk1a1	Mus musculus 10 days embryo whole body cDNA, RIKEN full-length enriched library, clone:2610208K14 product:CASEIN KINASE I-ALPHA (FRAGMENT) homolog [Bos taurus], full insert sequence.	chr18:61747087:61747953:+	3	61747769-61747891,61747239-61747305,61747587-61747701
15275	Hk1	hexokinase-1 isoform HK1	chr10:61731603:61732656:-	7	61732086-61732170,61732437-61732480,61732531-61732611,61732198-61732294,61731865-61731962,61731972-61732083,61732367-61732422
103694	Tmed4	transmembrane emp24 domain-containing protein 4	chr11:6170717:6171653:-	1	6171305-6171377
56697	Akap10	RecName: Full=A-kinase anchor protein 10, mitochondrial; Short=AKAP-10; AltName: Full=Dual specificity A kinase-anchoring protein 2; Short=D-AKAP-2; AltName: Full=Protein kinase A-anchoring protein 10; Short=PRKA10; Flags: Precursor;	chr11:61684809:61686517:-	3	61685502-61685559,61685019-61685080,61684979-61685017
29869	Ulk2	serine/threonine-protein kinase ULK2	chr11:61589100:61591282:-	6	61591248-61591290,61590186-61590260,61589623-61589671,61589844-61589945,61590413-61590483,61589299-61589337
29820	Tnfrsf19	tumor necrosis factor receptor superfamily	chr14:61582671:61585293:-	1	61583744-61583785
69894	2010107G23Rik	hypothetical protein LOC69894	chr10:61570404:61571601:-	1	61571247-61571288
170826	Ppargc1b	peroxisome proliferator-activated receptor gamma	chr18:61457790:61458336:-	2	61457998-61458112,61457862-61457985
13521	Slc26a2	sulfate transporter	chr18:61356508:61357791:-	1	61357032-61357121
13855	Epn2	epsin-2	chr11:61330751:61332919:-	3	61332804-61332863,61330802-61330844,61332588-61332626
12978	Csf1r	macrophage colony-stimulating factor 1 receptor	chr18:61290134:61290793:+	1	61290388-61290442
71361	Aifm2	apoptosis-inducing factor 2 isoform 2	chr10:61199482:61200941:+	1	61199755-61199830
14773	Grk5	G protein-coupled receptor kinase 5	chr19:61167895:61168458:+	1	61168270-61168329
67473	Slc47a1	multidrug and toxin extrusion protein 1	chr11:61156902:61157803:-	1	61157562-61157627
20224	Sar1a	GTP-binding protein SAR1a	chr10:61154149:61156045:+	7	61154784-61154861,61154595-61154640,61155787-61155846,61154883-61154934,61155477-61155533,61155598-61155719,61154984-61155033
12322	mKIAA0968	Mus musculus adult male hippocampus cDNA, RIKEN full-length enriched library, clone:C630031A06 product:calcium/calmodulin-dependent protein kinase II alpha, full insert sequence.	chr18:61144434:61147806:+	8	61144608-61144673,61144558-61144601,61144703-61144744,61146144-61146245,61147375-61147486,61144434-61144556,61145737-61145792,61145933-61146041
67895	Ppa1	inorganic pyrophosphatase	chr10:61136598:61136913:+	1	61136681-61136716
11671	Aldh3a2	fatty aldehyde dehydrogenase	chr11:61058257:61059811:-	2	61059255-61059304,61058709-61058751
13024	Ctla2a	protein CTLA-2-alpha isoform b	chr13:61035516:61036380:-	1	61036166-61036227
216825	Usp22	ubiquitin carboxyl-terminal hydrolase 22	chr11:60965444:60967972:-	2	60967218-60967273,60965513-60965575
11757	Prdx3	thioredoxin-dependent peroxide reductase,	chr19:60939969:60940568:-	4	60940511-60940568,60940384-60940477,60940132-60940205,60940039-60940110
219135	Mtmr6	myotubularin-related protein 6	chr14:60919358:60921207:+	5	60919995-60920091,60919393-60919457,60919547-60919619,60920413-60920454,60920615-60920698
13688	Eif4ebp2	eukaryotic translation initiation factor	chr10:60895245:60896544:-	3	60895545-60895602,60896500-60896552,60895413-60895524
69635	Dapk1	Mus musculus adult male tongue cDNA, RIKEN full-length enriched library, clone:2310039H24 product:death associated protein kinase 1, full insert sequence.	chr13:60863228:60864547:+	1	60863905-60863941
66467	Gtf2h5	general transcription factor IIH subunit 5	chr17:6084652:6085485:+	2	6084888-6084940,6085176-6085228
15531	Ndst1	bifunctional heparan sulfate	chr18:60845630:60848898:-	5	60848505-60848619,60848627-60848690,60847328-60847414,60847225-60847263,60846907-60846962
13669	Eif3a	eukaryotic translation initiation factor 3	chr19:60837019:60837983:-	1	60837099-60837171
12487	Cd28	T-cell-specific surface glycoprotein CD28	chr1:60826629:60830203:+	4	60829025-60829079,60827540-60827575,60829150-60829258,60827630-60827683
18441	P2ry1	P2Y purinoceptor 1	chr3:60810821:60812901:+	5	60812521-60812578,60812698-60812803,60812182-60812296,60811813-60811874,60812059-60812111
27355	X99384	paladin	chr10:60782405:60783837:-	1	60782416-60782471
67665	Dctn4	Mus musculus 18-day embryo whole body cDNA, RIKEN full-length enriched library, clone:1110001K06 product:dynactin 4, full insert sequence.	chr18:60716095:60718416:+	6	60717421-60717480,60717999-60718111,60717304-60717368,60716780-60716868,60717137-60717194,60716537-60716606
106878	2010002N04Rik	putative small membrane protein NID67	chr18:60633845:60635049:-	4	60633941-60633993,60634244-60634341,60634919-60634980,60634348-60634449
78832	2700078E11Rik	hypothetical protein LOC78832 isoform 1	chr19:60603769:60604949:-	2	60604428-60604512,60604545-60604648
237782	Smcr8	Smith-Magenis syndrome chromosomal region	chr11:60597709:60601789:+	2	60599202-60599242,60600141-60600176
56878	Rbms1	RNA-binding motif, single-stranded-interacting	chr2:60590010:60591039:-	4	60590424-60590541,60590025-60590107,60590288-60590344,60590547-60590610
20397	Sgpl1	sphingosine-1-phosphate lyase 1	chr10:60561392:60563615:-	7	60561664-60561734,60563168-60563239,60561420-60561498,60562707-60562758,60563441-60563489,60561547-60561621,60563288-60563346
60440	IIGP	Mus musculus mRNA for IIGP protein.	chr18:60550707:60552281:+	2	60551071-60551188,60550974-60551048
237781	Smcr7	Smith-Magenis syndrome chromosomal region	chr11:60545472:60546453:+	1	60546293-60546329
329165	Abi2	abl interactor 2 isoform 1	chr1:60533759:60538002:+	2	60535357-60535407,60535165-60535206
14248	Flii	protein flightless-1 homolog	chr11:60527651:60527814:-	1	60527698-60527741
16897	Llgl1	lethal(2) giant larvae protein homolog 1 isoform	chr11:60526547:60527689:+	1	60527433-60527520
77951	Cyp20a1	cytochrome P450 20A1	chr1:60444133:60444231:+	1	60444170-60444224
16420	Itgb6	integrin beta-6 precursor	chr2:60436350:60438541:-	5	60437047-60437110,60437816-60437854,60436780-60436816,60436864-60436906,60436559-60436638
321007	Serac1	protein SERAC1 isoform 3	chr17:6040571:6044113:-	3	6043318-6043354,6043251-6043315,6041508-6041559
56758	Mbnl1	muscleblind-like protein 1	chr3:60430302:60433670:+	11	60431302-60431356,60433215-60433309,60432595-60432707,60431723-60431775,60430725-60430846,60433462-60433565,60432813-60432929,60431787-60431871,60431598-60431714,60431484-60431568,60430971-60431065
269198	Nbeal1	neurobeachin like 1	chr1:60387836:60391549:+	10	60390496-60390559,60390869-60390983,60389069-60389108,60390417-60390472,60388306-60388369,60389599-60389690,60389447-60389559,60388715-60388807,60389702-60389746,60390645-60390761
20975	Synj2	synaptojanin-2 isoform a	chr17:6038115:6038555:+	1	6038234-6038290
268420	Alkbh5	probable alpha-ketoglutarate-dependent	chr11:60367917:60372014:+	12	60371077-60371170,60370535-60370622,60371180-60371234,60367910-60368028,60371248-60371332,60370279-60370347,60368361-60368446,60368557-60368683,60368044-60368153,60368696-60368810,60369247-60369367,60370403-60370468
14451	Gas1	growth arrest-specific protein 1	chr13:60275766:60277147:-	1	60276346-60276396
76539	D19Ertd737e	Mus musculus 10 days embryo whole body cDNA, RIKEN full-length enriched library, clone:2610015K05 product:hypothetical Prenyl group binding site (CAAX box) containing protein, full insert sequence.	chr19:60274489:60275338:-	1	60274758-60274796
66771	4933439F18Rik	hypothetical protein LOC66771	chr11:60255544:60258779:+	2	60258336-60258395,60256755-60256820
75415	Arhgap12	rho GTPase-activating protein 12 isoform 1	chr18:6024448:6026553:-	3	6024862-6024914,6025922-6025961,6024684-6024732
107449	Unc5b	netrin receptor UNC5B precursor	chr10:60225343:60227955:-	1	60225886-60225969
227545	5430407P10Rik	hypothetical protein LOC227545	chr2:6019546:6021381:-	1	6020973-6021023
57750	Wdr12	ribosome biogenesis protein WDR12	chr1:60133712:60135007:-	1	60134512-60134547
57438	March7	Mus musculus axotrophin mRNA, complete cds.	chr2:60085966:60086442:+	1	60086299-60086340
209586	mKIAA1068	Mus musculus adult male testis cDNA, RIKEN full-length enriched library, clone:4932418A19 product:KIAA1068 PROTEIN (FRAGMENT) homolog [Homo sapiens], full insert sequence.	chr11:6005696:6008247:-	15	6006216-6006317,6007293-6007397,6007208-6007277,6006469-6006529,6008044-6008107,6006554-6006605,6007798-6007910,6007685-6007797,6005990-6006064,6007084-6007200,6007617-6007676,6006352-6006465,6006617-6006698,6007472-6007550,6006903-6006953
20334	Sec23a	protein transport protein Sec23A	chr12:60059371:60060983:-	4	60060123-60060198,60060842-60060913,60060488-60060535,60060620-60060735
216810	Tom1l2	SubName: Full=Target of myb1-like 2 (Chicken); Flags: Fragment;	chr11:60040216:60043594:-	16	60042085-60042155,60043219-60043280,60040419-60040475,60042423-60042533,60040223-60040332,60042573-60042672,60040883-60040922,60042766-60042821,60043073-60043195,60041219-60041297,60043506-60043551,60041078-60041126,60041452-60041526,60040333-60040418,60042157-60042222,60043394-60043488
72750	Fam117b	family with sequence similarity 117, member B	chr1:60038571:60042190:+	3	60039266-60039301,60039389-60039465,60039520-60039566
20787	Srebf1	sterol regulatory element-binding protein 1	chr11:60012591:60013423:-	2	60012798-60012852,60013352-60013411
19377	Rai1	retinoic acid-induced protein 1	chr11:60011547:60012697:+	1	60012189-60012261
108150	Galnt7	N-acetylgalactosaminyltransferase 7 isoform 1	chr8:60003366:60004910:-	2	60004509-60004564,60004605-60004686
74998	Rab11fip2	Rab11-family interacting protein 2 isoform 1	chr19:59978789:59982818:-	3	59981560-59981601,59979885-59979933,59979655-59979715
12168	Bmpr2	bone morphogenetic protein receptor type-2	chr1:59927329:59927703:+	2	59927511-59927616,59927403-59927448
209131	Snx30	sorting nexin-30	chr4:59911839:59917612:+	1	59912585-59912621
50799	Slc25a13	calcium-binding mitochondrial carrier protein	chr6:5991218:5992145:-	1	5991225-5991285
12333	Capn1	calpain-1 catalytic subunit	chr19:5988545:5989360:-	4	5988764-5988856,5988874-5988958,5989295-5989385,5989157-5989223
69046	Isca1	iron-sulfur cluster assembly 1 homolog,	chr13:59856776:59858215:-	4	59857229-59857274,59856777-59856828,59857487-59857548,59857281-59857392
74048	4632428N05Rik	platelet receptor Gi24 isoform 2 precursor	chr10:59831687:59835432:+	1	59835279-59835329
15111	Hand2	heart- and neural crest derivatives-expressed	chr8:59802657:59803314:+	2	59802761-59802811,59802889-59803011
381990	Zbtb2	zinc finger and BTB domain containing 2	chr10:5978061:5979467:+	1	5979327-5979366
230259	E130308A19Rik	hypothetical protein LOC230259 isoform 1	chr4:59765911:59767175:+	1	59766813-59766867
19156	Psap	sulfated glycoprotein 1 isoform E preproprotein	chr10:59764477:59765347:+	5	59764947-59765073,59764446-59764536,59764821-59764946,59764668-59764790,59764538-59764664
26900	Ddx3y	ATP-dependent RNA helicase DDX3Y	chrY:597158:599730:-	5	597545-597603,598363-598419,597494-597543,597249-597311,598260-598317
66860	AK134490	SubName: Full=Putative uncharacterized protein;	chr2:59682180:59684206:+	4	59683532-59683628,59682164-59682221,59683144-59683227,59682605-59682662
72479	Hsdl2	SubName: Full=Hydroxysteroid dehydrogenase like 2;	chr4:59630619:59631566:+	1	59630632-59630749
216805	Flcn	folliculin	chr11:59605253:59606111:-	2	59605448-59605493,59605807-59605850
26936	Mprip	SubName: Full=Myosin phosphatase Rho interacting protein;	chr11:59589018:59594362:+	4	59593855-59593916,59591139-59591197,59589162-59589248,59589311-59589369
67269	Agtpbp1	RecName: Full=Cytosolic carboxypeptidase 1; EC=3.4.17.-; AltName: Full=ATP/GTP-binding protein 1; AltName: Full=Nervous system nuclear protein induced by axotomy;	chr13:59550896:59551497:-	3	59551184-59551223,59550950-59551022,59551098-59551141
14369	Fzd7	frizzled-7 precursor	chr1:59541522:59543799:+	2	59542785-59542837,59542731-59542779
18746	Pkm2	pyruvate kinase isozymes M1/M2	chr9:59526641:59527182:+	2	59526789-59526833,59526861-59526949
211770	Trib1	tribbles homolog 1	chr15:59486256:59488654:+	1	59487757-59487851
230257	Rod1	regulator of differentiation 1 isoform 1	chr4:59484742:59489754:-	7	59487139-59487189,59486695-59486751,59486527-59486590,59485554-59485654,59486417-59486465,59487043-59487089,59485663-59485729
52717	Anapc16	anaphase-promoting complex subunit 16	chr10:59450657:59451470:-	1	59450860-59450900
74747	Ddit4	DNA damage-inducible transcript 4 protein	chr10:59412423:59413283:-	1	59412736-59412840
107368	Pdzd8	PDZ domain containing 8	chr19:59370574:59374012:-	5	59373675-59373737,59373493-59373569,59373775-59373811,59373225-59373263,59373390-59373485
68501	Nsmce2	E3 SUMO-protein ligase NSE2 isoform 2	chr15:59369083:59371220:+	2	59370814-59370871,59369786-59369881
56709	Dnajb12	dnaJ homolog subfamily B member 12	chr10:59360239:59360764:+	1	59360511-59360556
268417	Zkscan17	zinc finger protein 496 isoform 1	chr11:59299023:59300567:-	1	59300074-59300134
23806	AK050838	Mus musculus 16 days neonate thymus cDNA, RIKEN full-length enriched library, clone:A130020H12 product:ariadne ubiquitin-conjugating enzyme E2 binding protein homolog 1 (Drosophila), full insert sequence.	chr9:59236361:59241100:-	14	59238295-59238358,59237998-59238058,59240215-59240316,59238883-59238945,59239879-59239946,59240028-59240134,59240362-59240408,59237944-59237994,59239610-59239657,59238783-59238834,59239189-59239250,59239381-59239483,59238700-59238749,59239126-59239176
22234	Ugcg	ceramide glucosyltransferase	chr4:59233265:59235705:+	4	59234576-59234655,59233960-59234031,59233374-59233458,59234832-59234882
67826	Snap47	synaptosomal-associated protein 47	chr11:59220652:59221165:-	2	59220771-59220818,59220670-59220721
227937	Pkp4	Mus musculus mammary gland RCB-0527 Jyg-MC(B) cDNA, RIKEN full-length enriched library, clone:G930005B12 product:unclassifiable, full insert sequence.	chr2:59192505:59193262:+	3	59192829-59192880,59192757-59192812,59192604-59192718
104252	Cdc42ep2	cdc42 effector protein 2	chr19:5917561:5918030:-	1	5917593-5917648
50753	Fbxo8	F-box only protein 8	chr8:59070420:59072736:+	2	59071416-59071475,59070508-59070586
14700	Gng10	guanine nucleotide-binding protein	chr4:59053947:59054771:+	1	59054117-59054164
11840	Arf1	ADP-ribosylation factor 1	chr11:59024914:59026035:-	4	59025081-59025122,59025940-59026034,59025374-59025433,59025308-59025343
14923	Guk1	guanylate kinase isoform 2	chr11:58997357:58997653:-	1	58997398-58997444
216792	A230051G13Rik	putative transferase C1orf69 homolog,	chr11:58968871:58971766:-	3	58970748-58970820,58971224-58971288,58970644-58970701
70827	Trak2	trafficking protein, kinesin binding 2	chr1:58957294:58960347:-	11	58960059-58960130,58959173-58959299,58957886-58957957,58958645-58958728,58957421-58957470,58958069-58958167,58957615-58957677,58958930-58959028,58957501-58957562,58959509-58959566,58960169-58960225
73419	1700052N19Rik	hypothetical protein LOC73419	chr10:5891401:5892304:-	2	5891728-5891764,5891924-5891962
58909	Fam13a	family with sequence similarity 13, member A1	chr6:58883530:58885578:-	1	58884373-58884434
73442	Hspa12a	heat shock 70 kDa protein 12A	chr19:58870241:58873850:-	3	58871796-58871844,58871001-58871105,58871423-58871484
73998	Herc3	hect domain and RLD 3	chr6:58868915:58870390:+	5	58869741-58869843,58869580-58869629,58869975-58870029,58869123-58869248,58869249-58869349
66307	Isoc1	isochorismatase domain-containing protein 1	chr18:58837565:58839224:+	7	58837789-58837831,58837863-58837923,58837924-58838039,58838149-58838263,58837717-58837764,58838381-58838448,58837600-58837715
12633	Cflar	CASP8 and FADD-like apoptosis regulator isoform	chr1:58810766:58815726:+	9	58811222-58811258,58814204-58814286,58815542-58815596,58811024-58811062,58812180-58812267,58815244-58815304,58812876-58812931,58813493-58813549,58811811-58811905
211401	Mtss1	metastasis suppressor protein 1 isoform 1	chr15:58772795:58774984:-	3	58772829-58772928,58772974-58773043,58774200-58774267
18007	Neo1	SubName: Full=Putative uncharacterized protein;	chr9:58722487:58725080:-	7	58722701-58722779,58724199-58724281,58723082-58723126,58723908-58723996,58722781-58722895,58724725-58724799,58724293-58724351
12323	Camk2b	Mus musculus calmodulin-dependent protein kinase II beta M isoform mRNA, partial cds.	chr11:5869670:5871829:-	2	5871710-5871800,5871466-5871556
12892	Cpox	SubName: Full=Putative uncharacterized protein;	chr16:58678870:58680502:+	3	58679792-58679837,58679113-58679171,58679180-58679241
23849	Klf6	Krueppel-like factor 6	chr13:5866529:5869639:+	4	5867128-5867194,5868375-5868433,5869064-5869127,5867207-5867244
56418	Ykt6	synaptobrevin homolog YKT6	chr11:5866047:5867783:+	2	5866184-5866247,5867562-5867609
103080	Sept10	septin-10 isoform 1	chr10:58626861:58627676:-	1	58627430-58627480
74868	Tmem65	transmembrane protein 65	chr15:58613824:58616463:-	13	58615312-58615425,58615191-58615311,58615070-58615190,58615429-58615524,58615529-58615594,58614659-58614778,58613970-58614069,58614538-58614658,58616200-58616285,58616286-58616359,58616114-58616189,58614144-58614211,58614080-58614124
213056	Fam126b	hypothetical protein LOC213056	chr1:58579650:58586501:-	9	58585550-58585602,58580760-58580818,58584736-58584802,58585334-58585369,58586250-58586305,58580846-58580912,58585635-58585678,58581629-58581668,58583605-58583650
54216	Pcdh7	protocadherin 7 isoform 2	chr5:58520590:58523479:+	3	58520763-58520825,58522362-58522438,58522541-58522603
20320	Nptn	neuroplastin precursor	chr9:58499666:58500686:+	4	58499839-58499905,58499997-58500038,58500335-58500393,58500134-58500195
73379	Dcbld2	discoidin, CUB and LCCL domain-containing	chr16:58465902:58469858:+	5	58467363-58467415,58465961-58466020,58467443-58467492,58468587-58468634,58467604-58467642
75965	Zdhhc20	probable palmitoyltransferase ZDHHC20	chr14:58451539:58455483:-	2	58451700-58451749,58452897-58452937
20220	Gm10094	predicted gene, ENSMUSG00000061104	chr14:58420915:58423815:+	1	58421788-58421826
69227	2810407C02Rik	selenoprotein T precursor	chr3:58394617:58397466:+	3	58394754-58394844,58395107-58395180,58396309-58396347
328099	Prps1l3	hypothetical protein LOC328099	chr12:58340369:58343153:+	1	58340399-58340456
50523	Lats2	serine/threonine-protein kinase LATS2 isoform 1	chr14:58308499:58310124:-	4	58309357-58309396,58309211-58309294,58308616-58308724,58309422-58309485
210998	D15Ertd621e	hypothetical protein LOC210998	chr15:58286487:58289295:+	2	58287832-58287907,58289026-58289065
56085	Ubqln1	SubName: Full=Putative uncharacterized protein; Flags: Fragment;	chr13:58277523:58279236:-	6	58278372-58278423,58278315-58278356,58278433-58278500,58278892-58278984,58278197-58278259,58278998-58279114
72033	Tsc22d2	TSC22 domain family protein 2	chr3:58264190:58270709:+	3	58264265-58264304,58265173-58265254,58270581-58270618
79566	Sh3bp5l	Mus musculus 15 days embryo head cDNA, RIKEN full-length enriched library, clone:D930003N22 product:weakly similar to SH3 DOMAIN-BINDING PROTEIN 5 (SH3 DOMAIN-BINDING PROTEIN THAT PREFERENTIALLY ASSOCIATES WITH BTK) [Homo sapiens], full insert sequence.	chr11:58159899:58161229:+	1	58160326-58160421
319475	Zfp672	zinc finger protein 672	chr11:58128616:58131036:-	2	58128898-58128938,58130642-58130715
20496	Slc12a2	solute carrier family 12 member 2	chr18:58103705:58106474:+	4	58104831-58104890,58106180-58106273,58104180-58104251,58104071-58104167
13608	Edar	tumor necrosis factor receptor superfamily	chr10:58063536:58065609:-	1	58063982-58064028
54396	Irgm2	interferon inducible GTPase 2	chr11:58034174:58036282:+	2	58034466-58034506,58034940-58035056
67731	Fbxo32	F-box only protein 32	chr15:58011634:58013020:-	6	58011953-58012005,58012288-58012347,58011866-58011928,58011797-58011858,58012561-58012599,58012361-58012438
67198	Spats2l	SPATS2-like protein isoform 1	chr1:58003307:58005241:+	1	58003452-58003514
76773	Wdyhv1	protein N-terminal glutamine amidohydrolase	chr15:57989572:57990209:+	1	57989888-57989960
19386	Ranbp2	Mus musculus 0 day neonate thymus cDNA, RIKEN full-length enriched library, clone:A430087B05 product:RAN-BINDING PROTEIN 2 homolog [Mus musculus], full insert sequence.	chr10:57956716:57956902:+	1	57956634-57956716
57743	Sec61a2	protein transport protein Sec61 subunit alpha	chr2:5792033:5792880:-	1	5792104-5792149
11641	Akap2	A-kinase anchor protein 2 isoform 2	chr4:57905763:57909856:+	8	57907444-57907505,57909589-57909642,57908050-57908147,57909648-57909758,57908824-57908895,57907123-57907241,57907781-57907889,57909420-57909503
110829	Lims1	LIM and senescent cell antigen-like-containing	chr10:57884316:57887437:+	6	57884360-57884416,57885403-57885440,57886778-57886876,57886673-57886762,57887043-57887099,57886601-57886664
70297	Gcc2	GRIP and coiled-coil domain-containing protein	chr10:57766912:57768340:+	1	57767678-57767732
21417	AK041408	Mus musculus 3 days neonate thymus cDNA, RIKEN full-length enriched library, clone:A630007I07 product:unclassifiable, full insert sequence.	chr18:5773064:5774909:+	2	5773770-5773830,5774234-5774293
242481	Palm2	paralemmin-2	chr4:57723059:57730000:+	1	57723037-57723076
232023	Vopp1	EGFR-coamplified and overexpressed protein	chr6:57702258:57704479:-	4	57703277-57703338,57702870-57702929,57704023-57704069,57703226-57703261
67819	Derl1	derlin-1	chr15:57701057:57703322:-	9	57702017-57702073,57702208-57702248,57702533-57702589,57701738-57701776,57701818-57701856,57702631-57702708,57702303-57702352,57701877-57701918,57702358-57702413
71835	Lancl2	lanC-like protein 2	chr6:57687744:57688475:+	1	57687909-57687961
387609	Zhx2	zinc fingers and homeoboxes protein 2	chr15:57670146:57671387:+	2	57670968-57671011,57670433-57670555
18645	Pfn2	profilin-2	chr3:57645818:57647138:-	8	57646106-57646166,57646747-57646813,57646036-57646091,57646941-57647024,57646394-57646460,57645909-57645987,57646514-57646633,57646194-57646254
66459	Pigy	Mus musculus 18-day embryo whole body cDNA, RIKEN full-length enriched library, clone:1110014N03 product:hypothetical protein, full insert sequence.	chr6:57634733:57639730:-	2	57639286-57639336,57635782-57635822
56380	Arid3b	AT-rich interactive domain-containing protein	chr9:57638316:57640322:-	1	57638314-57638367
12837	Col8a1	collagen alpha-1(VIII) chain precursor	chr16:57624369:57627023:-	1	57624879-57624917
76007	Zmym2	SubName: Full=Zmym2 protein;	chr14:57578744:57579186:+	1	57578808-57578865
73137	Prrc1	protein PRRC1	chr18:57549083:57552373:+	10	57551023-57551076,57551258-57551319,57551847-57551939,57549448-57549499,57551701-57551794,57550151-57550238,57549786-57549848,57550246-57550302,57551445-57551498,57550851-57550913
12988	Csk	tyrosine-protein kinase CSK	chr9:57474453:57475127:-	2	57474578-57474646,57474496-57474577
226252	Fam160b1	hypothetical protein LOC226252	chr19:57461066:57464084:+	4	57462919-57462975,57462216-57462282,57461657-57461709,57462403-57462460
243382	Ppm1k	protein phosphatase 1K, mitochondrial precursor	chr6:57456496:57460711:-	12	57460185-57460295,57460359-57460468,57459412-57459496,57456774-57456836,57458245-57458369,57457950-57458007,57460589-57460657,57456561-57456636,57456994-57457075,57457309-57457432,57457705-57457801,57459643-57459761
24044	Scamp2	secretory carrier-associated membrane protein 2	chr9:57435363:57436605:+	3	57435450-57435492,57436338-57436393,57435360-57435398
106628	Trip10	cdc42-interacting protein 4	chr17:57402571:57402846:+	1	57402655-57402709
66645	Pspc1	paraspeckle component 1	chr14:57341286:57341931:-	5	57341496-57341552,57341788-57341843,57341299-57341348,57341854-57341915,57341683-57341734
67726	Fam114a2	hypothetical protein LOC67726 isoform 1	chr11:57296502:57297519:-	3	57296938-57297030,57296768-57296819,57296656-57296754
56807	Scamp5	secretory carrier-associated membrane protein 5	chr9:57289134:57291476:-	2	57291128-57291195,57290846-57290891
97064	Wwtr1	WW domain-containing transcription regulator	chr3:57259571:57262847:-	5	57261681-57261744,57261837-57261892,57260383-57260437,57260076-57260120,57261539-57261620
56442	Serinc1	serine incorporator 1	chr10:57235584:57236962:-	10	57235583-57235696,57236551-57236669,57235705-57235775,57236862-57236916,57236925-57237044,57236680-57236750,57236437-57236492,57235904-57235973,57236758-57236861,57236294-57236360
15500	Hsf2	Mus musculus 13 days embryo heart cDNA, RIKEN full-length enriched library, clone:D330016P04 product:HEAT SHOCK FACTOR PROTEIN 2 (HSF 2) (HEAT SHOCK TRANSCRIPTION FACTOR 2) (HSTF 2), full insert sequence.	chr10:57232004:57232949:+	3	57232638-57232690,57232789-57232824,57232453-57232539
14571	Gpd2	glycerol-3-phosphate dehydrogenase,	chr2:57219888:57223130:+	3	57222389-57222426,57220172-57220242,57222305-57222360
545622	Ptpn3	tyrosine-protein phosphatase non-receptor type	chr4:57203713:57207156:-	7	57204166-57204228,57203856-57203904,57204934-57204974,57204344-57204460,57206124-57206246,57205047-57205100,57206030-57206116
66972	Slc25a23	calcium-binding mitochondrial carrier protein	chr17:57183136:57184901:-	3	57183153-57183199,57184578-57184618,57183625-57183691
16549	Khsrp	far upstream element-binding protein 2	chr17:57160472:57162115:-	4	57161607-57161716,57160558-57160623,57161470-57161582,57160634-57160706
28185	Tomm70a	mitochondrial import receptor subunit TOM70	chr16:57152849:57154643:+	1	57152900-57153010
226251	AK041356	Mus musculus adult male diencephalon cDNA, RIKEN full-length enriched library, clone:9330196J19 product:unclassifiable, full insert sequence.	chr19:57107754:57111713:-	15	57110825-57110867,57111098-57111168,57109987-57110052,57110715-57110824,57110378-57110424,57111587-57111646,57108857-57108916,57111243-57111312,57108164-57108281,57108566-57108686,57110948-57111061,57111332-57111424,57108044-57108163,57111456-57111552,57110588-57110714
17112	Tm4sf1	transmembrane 4 L6 family member 1	chr3:57090986:57091677:-	1	57091568-57091620
114601	Ehbp1l1	EH domain-binding protein 1-like protein 1	chr19:5707374:5708325:-	1	5707658-5707703
64144	Mllt1	protein ENL	chr17:57032034:57033884:-	1	57032806-57032902
52592	Brms1l	RecName: Full=Breast cancer metastasis-suppressor 1-like protein;	chr12:56969266:56970722:+	4	56970551-56970602,56969887-56969963,56969535-56969578,56969708-56969761
56294	Ptpn9	tyrosine-protein phosphatase non-receptor type	chr9:56908966:56910614:+	2	56909442-56909494,56909562-56909600
242474	D730040F13Rik	hypothetical protein LOC242474	chr4:56888885:56893118:-	9	56890132-56890177,56890662-56890787,56891012-56891088,56890451-56890536,56892429-56892474,56889212-56889259,56891110-56891171,56891182-56891269,56891921-56891971
78286	Nav2	neuron navigator 2 isoform 2	chr7:56862191:56865458:+	17	56864561-56864636,56862396-56862465,56863146-56863225,56864351-56864413,56863574-56863613,56862882-56863008,56864105-56864227,56862764-56862814,56865241-56865301,56864999-56865034,56863010-56863111,56863968-56864041,56863451-56863573,56864233-56864342,56863622-56863680,56864493-56864546,56864708-56864769
17129	Smad5	SubName: Full=Putative uncharacterized protein; Flags: Fragment;	chr13:56838839:56843739:+	8	56840744-56840781,56841692-56841759,56840619-56840723,56839491-56839565,56843163-56843219,56842403-56842462,56839614-56839649,56839784-56839831
107569	Nt5c3	cytosolic 5'-nucleotidase 3	chr6:56832395:56832950:-	3	56832907-56832942,56832776-56832820,56832460-56832544
27055	Fkbp9	FK506 binding protein 9	chr6:56828204:56829354:+	2	56829016-56829100,56829129-56829188
235406	Snx33	sorting nexin-33	chr9:56765007:56766257:-	2	56765090-56765146,56765553-56765606
230233	Ikbkap	Mus musculus IKK-complex-associated protein IKAP mRNA, complete cds.	chr4:56762552:56764523:-	2	56764437-56764501,56763898-56763945
210973	Kbtbd2	kelch repeat and BTB (POZ) domain containing 2	chr6:56727519:56728871:-	3	56728493-56728538,56727725-56727787,56728272-56728354
56784	Ralgapa1	ral GTPase-activating protein subunit alpha-1	chr12:56703886:56705258:-	3	56704527-56704614,56704360-56704424,56704253-56704346
320712	Abi3bp	ABI gene family, member 3 (NESH) binding protein	chr16:56689162:56689430:+	1	56689274-56689321
110695	Aldh7a1	alpha-aminoadipic semialdehyde dehydrogenase	chr18:56685390:56686606:-	1	56686550-56686594
66866	Nhlrc2	NHL repeat-containing protein 2	chr19:56672002:56673336:+	5	56672691-56672732,56672028-56672075,56672309-56672402,56672187-56672237,56672812-56672860
107022	Gramd3	SubName: Full=Putative uncharacterized protein;	chr18:56662283:56663446:+	1	56662459-56662511
19280	Ptprs	receptor-type tyrosine-protein phosphatase S	chr17:56551849:56552747:-	1	56552236-56552322
654795	Sdr39u1	RecName: Full=Epimerase family protein SDR39U1; AltName: Full=Short-chain dehydrogenase/reductase family 39U member 1;	chr14:56516122:56516439:-	1	56516181-56516244
18140	Uhrf1	E3 ubiquitin-protein ligase UHRF1 isoform A	chr17:56461925:56462909:+	1	56461965-56462001
66905	Plin3	perilipin-3	chr17:56418385:56419154:-	2	56419051-56419095,56418836-56418910
14154	Fem1a	protein fem-1 homolog A-A	chr17:56398296:56403031:+	6	56399358-56399465,56398542-56398652,56399297-56399353,56402490-56402530,56398666-56398781,56398987-56399046
52585	Dhrs1	dehydrogenase/reductase SDR family member 1	chr14:56357859:56358120:-	1	56357923-56357994
66867	Hmg20a	RecName: Full=High mobility group protein 20A; AltName: Full=HMG box-containing protein 20A; AltName: Full=HMG domain-containing protein HMGX1; AltName: Full=Inhibitor of BRAF35; Short=iBRAF;	chr9:56342340:56344743:+	1	56342351-56342390
14168	Fgf13	fibroblast growth factor 13	chrX:56315328:56316709:-	5	56315649-56315761,56316222-56316330,56316021-56316105,56315834-56315957,56315494-56315543
58242	Nudt11	diphosphoinositol polyphosphate phosphohydrolase	chrX:5630145:5631869:+	1	5630315-5630366
18002	Nedd8	NEDD8 precursor	chr14:56281104:56281365:-	2	56281119-56281179,56281215-56281252
74140	Tm9sf1	transmembrane 9 superfamily member 1 precursor	chr14:56254803:56255055:-	1	56254946-56254985
66968	Plin5	perilipin-5	chr17:56251024:56251451:-	1	56251022-56251102
57435	Plin4	perilipin-4	chr17:56240014:56241429:-	2	56240129-56240193,56241025-56241061
66315	Senp7	Mus musculus ES cells cDNA, RIKEN full-length enriched library, clone:2410152H17 product:similar to SUMO-1 SPECIFIC PROTEASE 2 [Homo sapiens], full insert sequence.	chr16:56188485:56190124:+	1	56189801-56189849
28199	Dcaf11	DDB1- and CUL4-associated factor 11	chr14:56188208:56188902:+	2	56188185-56188241,56188475-56188530
26914	H2afy	core histone macro-H2A.1 isoform 1	chr13:56174984:56175587:-	2	56175261-56175318,56175333-56175422
72658	2700097O09Rik	hypothetical protein LOC72658	chr12:56146648:56146813:-	1	56146691-56146747
72046	Urgcp	up-regulator of cell proliferation isoform 1	chr11:5613420:5615687:-	3	5614501-5614563,5615406-5615449,5615037-5615156
14609	Gja1	gap junction alpha-1 protein	chr10:56108501:56110225:+	8	56109540-56109579,56109132-56109226,56108975-56109038,56108861-56108932,56109302-56109414,56109417-56109495,56110010-56110131,56109680-56109753
28200	Dhrs4	dehydrogenase/reductase SDR family member 4	chr14:56108770:56109175:+	1	56109003-56109057
13009	Csrp3	cysteine and glycine-rich protein 3	chr7:56085768:56085999:-	2	56085773-56085847,56085861-56085964
18575	Pde1c	calcium/calmodulin-dependent 3',5'-cyclic	chr6:56050436:56056843:-	6	56051550-56051624,56054852-56054896,56051835-56051893,56054037-56054097,56051439-56051542,56056399-56056470
244895	C230081A13Rik	tyrosine-protein kinase SgK269	chr9:56048936:56054254:-	13	56051416-56051467,56052774-56052871,56052872-56052964,56051994-56052068,56049575-56049638,56054171-56054221,56053613-56053667,56049069-56049109,56053442-56053506,56052984-56053057,56048959-56049041,56049392-56049459,56050081-56050145
76302	Pcnp	PEST proteolytic signal-containing nuclear	chr16:56015621:56017303:-	1	56016306-56016365
21416	Ppnr	SubName: Full=Mp41 protein;	chr19:56005924:56008144:+	5	56006281-56006326,56007205-56007293,56007976-56008025,56006937-56006980,56006330-56006447
56434	tspan-3	Mus musculus mRNA for H41D4 protein, partial cds.	chr9:55983692:55984449:-	5	55984098-55984205,55984360-55984468,55983897-55983991,55983737-55983861,55984252-55984347
12632	Cfl2	cofilin-2	chr12:55959806:55962111:-	5	55960848-55960927,55961798-55961887,55961591-55961681,55961404-55961503,55961891-55962017
26611	Rcn2	SubName: Full=Putative uncharacterized protein;	chr9:55906018:55906890:+	3	55906247-55906351,55906436-55906480,55906356-55906404
74201	Cep97	centrosomal protein of 97 kDa isoform 1	chr16:55900001:55905280:-	5	55904911-55904947,55901319-55901374,55901859-55901920,55903569-55903609,55903375-55903426
72183	Snx6	Mus musculus adult male small intestine cDNA, RIKEN full-length enriched library, clone:2010006G21 product:weakly similar to SORTING NEXIN 5 [Homo sapiens], full insert sequence.	chr12:55847344:55847992:-	3	55847452-55847517,55847698-55847775,55847548-55847604
78521	B230219D22Rik	hypothetical protein LOC78521	chr13:55801003:55804861:+	6	55801314-55801365,55804401-55804478,55802860-55802917,55802999-55803115,55801169-55801292,55801065-55801138
212880	Ddx46	probable ATP-dependent RNA helicase DDX46	chr13:55780192:55782617:+	1	55780345-55780387
104725	1110002B05Rik	small subunit of serine palmitoyltransferase A	chr12:55746361:55747418:-	1	55747218-55747266
544696	D630037F22Rik	protein broad-minded	chr10:55734100:55737390:-	1	55737206-55737242
67511	Tmed9	transmembrane emp24 domain-containing protein 9	chr13:55698351:55699055:+	3	55698786-55698865,55698668-55698739,55698875-55698952
76687	Spcs3	signal peptidase complex subunit 3	chr8:55605787:55608616:-	5	55606538-55606594,55606483-55606532,55606274-55606400,55606668-55606767,55606601-55606666
67399	Pdlim7	PDZ and LIM domain protein 7 isoform a	chr13:55598848:55600008:-	1	55599156-55599193
12050	Bcl2l2	bcl-2-like protein 2	chr14:55504370:55507071:+	1	55505091-55505128
239099	Homez	homeobox and leucine zipper protein Homez	chr14:55471574:55475529:-	1	55475402-55475441
11517	Adcyap1r1	pituitary adenylate cyclase-activating	chr6:55447165:55451449:+	3	55449523-55449559,55448665-55448713,55448480-55448529
66890	Lman2	vesicular integral-membrane protein VIP36	chr13:55445194:55448237:-	11	55446150-55446186,55446782-55446838,55446941-55446991,55446380-55446487,55446248-55446373,55445567-55445610,55445198-55445283,55445840-55445896,55446068-55446126,55446490-55446550,55445694-55445776
18193	Nsd1	histone-lysine N-methyltransferase, H3 lysine-36	chr13:55415089:55419686:+	8	55416537-55416608,55417364-55417400,55415896-55415985,55416398-55416468,55417196-55417306,55417307-55417357,55417449-55417558,55415715-55415802
19359	Rad23b	UV excision repair protein RAD23 homolog B	chr4:55402869:55405109:+	4	55402861-55402911,55404998-55405060,55403530-55403651,55403976-55404024
244891	Scaper	S phase cyclin A-associated protein in the	chr9:55397690:55398574:-	3	55398395-55398471,55398081-55398144,55398472-55398547
207704	Gtpbp10	GTP-binding protein 10	chr5:5537457:5539251:-	1	5537761-5537824
66980	Zdhhc6	probable palmitoyltransferase ZDHHC6	chr19:55372789:55373274:-	1	55372998-55373060
27041	G3BP	Mus musculus mRNA for ras-GTPase-activating protein SH3-domain binding protein, complete cds.	chr11:55313170:55314389:+	3	55313218-55313255,55313289-55313348,55313705-55313779
11826	Aqp1	aquaporin-1	chr6:55296791:55298549:+	4	55298166-55298225,55296922-55297007,55297692-55297744,55297402-55297460
212679	Mars2	methionyl-tRNA synthetase, mitochondrial	chr1:55295844:55296902:+	1	55296237-55296281
112407	Egln3	egl nine homolog 3	chr12:55279969:55281610:-	5	55281276-55281332,55280328-55280405,55281537-55281628,55280098-55280175,55281435-55281536
26919	Zfp346	zinc finger protein 346	chr13:55233755:55236432:+	2	55234046-55234089,55234091-55234146
19070	Mobkl3	mps one binder kinase activator-like 3	chr1:55209650:55211743:+	2	55209820-55209855,55209764-55209808
20692	Sparc	SPARC precursor	chr11:55208003:55209086:-	3	55208170-55208228,55208701-55208748,55208975-55209080
14732	Gpam	glycerol-3-phosphate acyltransferase 1,	chr19:55144224:55145419:-	7	55144312-55144435,55145076-55145130,55144437-55144538,55145260-55145296,55144950-55145042,55145391-55145439,55144697-55144738
67876	Coq10b	coenzyme Q-binding protein COQ10 homolog B,	chr1:55128647:55129546:+	3	55128684-55128769,55128854-55128915,55129025-55129077
242466	Zfp462	zinc finger protein 462	chr4:55093745:55096435:+	1	55094984-55095056
65107	Lrp10	low-density lipoprotein receptor-related protein	chr14:55088686:55089128:+	1	55088874-55088914
97998	AK164741	Mus musculus 10 days neonate cerebellum cDNA, RIKEN full-length enriched library, clone:B930034P11 product:DEP domain containing 6, full insert sequence.	chr15:55083690:55085757:+	3	55084370-55084411,55084509-55084593,55085500-55085536
64945	Cldn12	claudin-12	chr5:5505015:5507690:-	6	5507396-5507456,5507552-5507610,5506897-5506973,5507638-5507675,5506989-5507042,5506185-5506242
269023	mKIAA1281	Mus musculus 12 days embryo embryonic body below diaphragm region cDNA, RIKEN full-length enriched library, clone:3732425J11 product:hypothetical protein DKFZp434M098.1 (fragment) homolog [Homo sapiens], full insert sequence.	chr18:55047702:55048728:-	1	55048426-55048461
215335	Slc36a1	proton-coupled amino acid transporter 1	chr11:55046140:55049832:+	6	55046717-55046772,55049612-55049669,55046904-55046970,55046982-55047026,55047036-55047075,55047536-55047592
81898	Sf3b1	SubName: Full=Putative uncharacterized protein;	chr1:55042013:55044177:-	2	55042721-55042786,55042970-55043015
69089	Oxa1l	mitochondrial inner membrane protein OXA1L	chr14:54988135:54989353:+	2	54989043-54989090,54988245-54988300
229285	Spg20	SubName: Full=Putative uncharacterized protein Spg20;	chr3:54939602:54941253:+	4	54939860-54939925,54940293-54940367,54940628-54940671,54940372-54940462
12631	Cfl1	cofilin-1	chr19:5493493:5494031:+	2	5493889-5493952,5493784-5493826
105501	Abhd4	abhydrolase domain-containing protein 4	chr14:54887532:54888840:+	2	54888563-54888607,54887541-54887614
13135	Dad1	dolichyl-diphosphooligosaccharide--protein	chr14:54859336:54862412:-	1	54862374-54862445
387524	Znrf2	E3 ubiquitin-protein ligase ZNRF2	chr6:54838450:54839730:+	4	54838639-54838717,54838740-54838806,54839240-54839356,54838808-54838861
235386	Agphd1	aminoglycoside phosphotransferase	chr9:54794333:54797731:+	1	54796302-54796339
11749	Anxa6	annexin A6 isoform a	chr11:54792464:54792963:-	3	54792749-54792808,54792665-54792719,54792945-54792996
105239	Rnf44	RING finger protein 44 isoform 4	chr13:54780762:54783172:-	4	54781287-54781347,54781031-54781092,54781164-54781253,54782366-54782428
76577	mKIAA0887	Mus musculus 12 days embryo spinal ganglion cDNA, RIKEN full-length enriched library, clone:D130067L24 product:unclassifiable, full insert sequence.	chr13:54762497:54765424:+	1	54764954-54764990
64602	Ireb2	iron-responsive element-binding protein 2	chr9:54757548:54760341:+	4	54759009-54759120,54757858-54757928,54758098-54758159,54758662-54758704
329154	Ankrd44	serine/threonine-protein phosphatase 6	chr1:54702184:54705120:-	5	54703431-54703543,54704592-54704699,54702915-54702988,54703244-54703305,54704700-54704770
74325	Cltb	clathrin light chain B	chr13:54694300:54695231:-	4	54694762-54694816,54694857-54694929,54694602-54694666,54694436-54694494
28126	Nop16	nucleolar protein 16	chr13:54685552:54686641:-	2	54686215-54686286,54686135-54686190
75530	Lyrm7	Mus musculus adult male testis cDNA, RIKEN full-length enriched library, clone:1700024C24 product:hypothetical protein, full insert sequence.	chr11:54652791:54654633:-	2	54654101-54654170,54652871-54652926
97820	4833439L19Rik	hypothetical protein LOC97820	chr13:54652586:54653972:-	2	54652738-54652817,54653012-54653084
68235	2410066E13Rik	hypothetical protein LOC68235	chr6:54649115:54650400:+	1	54649342-54649428
11593	Aga	N(4)-(beta-N-acetylglucosaminyl)-L-asparaginase	chr8:54608630:54608776:+	1	54608630-54608681
231999	Plekha8	pleckstrin homology domain-containing family A	chr6:54590975:54595814:+	2	54594503-54594554,54594410-54594470
58233	Dnaja4	dnaJ homolog subfamily A member 4	chr9:54562483:54564119:+	6	54562851-54562921,54562679-54562804,54563268-54563332,54562548-54562658,54563192-54563251,54563525-54563573
73666	Thoc3	THO complex subunit 3	chr13:54560199:54561434:-	2	54560984-54561057,54560298-54560365
72729	Cdc42se2	CDC42 small effector protein 2	chr11:54530917:54533226:-	7	54532075-54532134,54531022-54531062,54533084-54533139,54532327-54532424,54531990-54532071,54532434-54532539,54532194-54532252
231997	Fkbp14	peptidyl-prolyl cis-trans isomerase FKBP14	chr6:54527599:54529521:-	1	54528094-54528202
192786	Rapgef6	Rap guanine nucleotide exchange factor (GEF) 6	chr11:54509607:54512787:+	4	54510067-54510135,54511771-54511827,54511704-54511762,54512643-54512688
73341	Arhgef6	Mus musculus Rac/Cdc42 guanine nucleotide exchange factor 6 (Arhgef6) mRNA, complete cds.	chrX:54484664:54486687:-	7	54486017-54486092,54485944-54486001,54484756-54484867,54485215-54485267,54485031-54485143,54484953-54485012,54486202-54486287
12890	Cplx2	complexin-2	chr13:54481073:54485278:+	1	54482617-54482675
67834	Idh3a	isocitrate dehydrogenase [NAD] subunit alpha,	chr9:54451172:54452469:+	5	54451098-54451177,54451198-54451318,54451780-54451855,54452174-54452288,54451325-54451446
27273	Pdk4	pyruvate dehydrogenase kinase, isozyme 4	chr6:5433351:5435448:-	10	5434945-5435059,5434809-5434914,5435333-5435442,5434502-5434554,5433400-5433475,5433587-5433699,5434197-5434242,5434395-5434479,5433778-5433840,5434036-5434099
216742	Fnip1	folliculin-interacting protein 1	chr11:54329078:54331738:+	8	54330589-54330654,54330787-54330911,54331203-54331266,54331544-54331601,54329087-54329213,54330312-54330370,54330082-54330186,54330694-54330778
72459	Htatsf1	RecName: Full=HIV Tat-specific factor 1 homolog;	chrX:54320031:54320359:+	2	54320105-54320151,54319986-54320048
104479	Ccdc117	coiled-coil domain-containing protein 117	chr11:5428891:5431298:-	4	5429740-5429784,5429409-5429467,5429176-5429226,5428948-5429001
238161	Akap6	A kinase (PRKA) anchor protein 6	chr12:54248798:54252002:+	11	54251016-54251089,54250505-54250583,54250748-54250829,54249708-54249765,54249427-54249489,54248902-54248984,54249122-54249226,54248991-54249051,54251528-54251627,54249491-54249595,54249606-54249697
101685	Spty2d1	protein SPT2 homolog	chr7:54245767:54248662:-	3	54247215-54247259,54246237-54246277,54246962-54247006
22088	Tsg101	tumor susceptibility gene 101 protein	chr7:54144397:54144984:-	1	54144764-54144801
70425	Csnk1g3	casein kinase I isoform gamma-3	chr18:54112953:54115338:+	2	54114988-54115032,54113479-54113519
16828	Ldha	L-lactate dehydrogenase A chain isoform 1	chr7:54110511:54110996:+	3	54110951-54110992,54110781-54110848,54110579-54110639
56392	Shoc2	leucine-rich repeat protein SHOC-2	chr19:54105766:54107621:+	7	54106742-54106841,54106075-54106124,54105966-54106018,54106915-54106984,54107000-54107081,54107085-54107140,54107255-54107294
19664	AK164362	Mus musculus 12 days embryo spinal ganglion cDNA, RIKEN full-length enriched library, clone:D130064K14 product:unclassifiable, full insert sequence.	chr5:54044859:54048684:+	5	54046292-54046357,54047389-54047461,54047241-54047344,54046196-54046254,54047188-54047225
14199	Fhl1	four and a half LIM domains protein 1 isoform 3	chrX:54045104:54046523:+	2	54045666-54045774,54045873-54045915
18452	P4ha2	SubName: Full=Procollagen-proline, 2-oxoglutarate 4-dioxygenase (Proline 4-hydroxylase), alpha II polypeptide; Flags: Fragment;	chr11:53944762:53945169:+	2	53944806-53944867,53944949-53944986
236794	Slc9a6	solute carrier family 9 (sodium/hydrogen	chrX:53914625:53915070:+	4	53914606-53914659,53914828-53914909,53914927-53915007,53915013-53915048
329152	Hecw2	E3 ubiquitin-protein ligase HECW2 isoform 1	chr1:53863718:53870065:-	1	53868503-53868549
236792	Mmgt1	membrane magnesium transporter 1 precursor	chrX:53838689:53842320:-	7	53841691-53841744,53840828-53840950,53838747-53838802,53841435-53841497,53841622-53841674,53840971-53841011,53841390-53841427
225523	Cep120	centrosomal protein of 120 kDa	chr18:53841377:53842886:-	2	53841420-53841473,53842483-53842562
65255	Asb4	ankyrin repeat and SOCS box protein 4	chr6:5381047:5383021:+	3	5382412-5382484,5382537-5382579,5382928-5382983
98267	Stk17b	serine/threonine-protein kinase 17B	chr1:53812356:53814331:-	1	53813321-53813372
18519	Kat2b	histone acetyltransferase KAT2B isoform 1	chr17:53810193:53812045:+	5	53810485-53810535,53811586-53811637,53810999-53811073,53811101-53811170,53811253-53811291
66873	Tril	TLR4 interactor with leucine rich repeats	chr6:53765462:53767799:-	1	53766901-53766937
69860	Eif1ad	probable RNA-binding protein EIF1AD	chr19:5370085:5371511:+	3	5370979-5371051,5371136-5371258,5370617-5370676
20520	Slc22a5	solute carrier family 22 member 5	chr11:53678048:53679310:-	1	53678448-53678514
100434	Slc44a1	choline transporter-like protein 1 isoform B	chr4:53634481:53635350:+	2	53635239-53635295,53634856-53634921
17155	Man1a	Mus musculus 10 days neonate skin cDNA, RIKEN full-length enriched library, clone:4732479I16 product:mannosidase 1, alpha, full insert sequence.	chr10:53625839:53627242:-	4	53626843-53626913,53626496-53626600,53626750-53626785,53627061-53627110
78619	Zfp449	zinc finger protein 449	chrX:53616802:53618851:+	2	53617366-53617403,53616856-53616893
76479	Smndc1	survival of motor neuron-related-splicing factor	chr19:53453704:53454953:-	1	53454252-53454314
17859	Mxi1	max-interacting protein 1 isoform a	chr19:53446226:53450300:+	5	53447464-53447547,53446953-53446989,53446786-53446894,53447241-53447294,53447050-53447113
239985	Arid1b	Mus musculus adult male diencephalon cDNA, RIKEN full-length enriched library, clone:9330189K18 product:Warning: possibly chimeric clone, full insert sequence.	chr17:5343087:5347656:+	2	5343396-5343435,5343264-5343325
268656	Sptlc1	serine palmitoyltransferase 1	chr13:53428119:53429252:-	2	53428529-53428608,53428737-53428838
75717	Cul5	Mus musculus adult male testis cDNA, RIKEN full-length enriched library, clone:4921514I20 product:VASOPRESSIN-ACTIVATED CALCIUM-MOBILIZING RECEPTOR (VACM-1) (CULLIN HOMOLOG 5) (CUL-5) homolog [Rattus norvegicus], full insert sequence.	chr9:53422687:53425920:-	7	53424247-53424337,53425330-53425375,53425484-53425548,53424538-53424574,53423037-53423102,53425218-53425273,53424345-53424400
16568	Kif3a	SubName: Full=Kinesin-like protein KIF3Abeta; Flags: Fragment;	chr11:53414561:53417746:+	4	53414927-53414983,53416041-53416133,53417679-53417724,53414754-53414830
110446	Acat1	acetyl-CoA acetyltransferase, mitochondrial	chr9:53388627:53390649:-	3	53389830-53389900,53390343-53390412,53390584-53390653
227102	Ormdl1	ORM1-like protein 1	chr1:53365806:53367089:+	2	53366985-53367032,53366073-53366179
20927	Abcc8	ATP-binding cassette, sub-family C (CFTR/MRP),	chr7:53359893:53359993:-	1	53359925-53359978
20362	Sept8	septin-8	chr11:53354538:53357598:+	5	53354713-53354786,53357450-53357545,53357333-53357446,53356775-53356821,53355517-53355609
16514	Kcnj11	ATP-sensitive inward rectifier potassium channel	chr7:53352532:53354094:-	4	53353931-53353980,53352789-53352842,53353639-53353706,53353857-53353909
211548	Nomo1	nodal modulator 1	chr7:53339104:53339582:+	1	53339168-53339278
66403	Asf1a	histone chaperone ASF1A	chr10:53327683:53329021:+	1	53327645-53327686
27360	Add3	gamma-adducin isoform a	chr19:53319780:53321888:+	2	53320028-53320066,53321203-53321324
242022	Frem2	RecName: Full=FRAS1-related extracellular matrix protein 2; AltName: Full=ECM3 homolog; AltName: Full=NV domain-containing protein 1; Flags: Precursor;	chr3:53317860:53320453:-	1	53319134-53319242
11920	Atm	serine-protein kinase ATM	chr9:53245227:53247850:-	4	53246358-53246413,53246298-53246344,53246229-53246276,53246043-53246087
93736	BC099959	Mus musculus AF4/FMR2 family, member 4, mRNA (cDNA clone IMAGE:30083378), with apparent retained intron.	chr11:53229017:53235332:+	13	53230126-53230163,53232006-53232066,53234372-53234433,53233705-53233824,53230837-53230879,53231420-53231502,53231005-53231116,53232434-53232530,53232149-53232270,53232578-53232634,53231314-53231372,53230942-53230994,53234491-53234595
68304	Kdelc2	KDEL (Lys-Asp-Glu-Leu) containing 2 protein	chr9:53207917:53209972:+	2	53208240-53208281,53208402-53208438
68137	Kdelr1	ER lumen protein retaining receptor 1	chr7:53138381:53139096:+	3	53138667-53138721,53138452-53138498,53138521-53138577
545276	Gal3st3	galactose-3-O-sulfotransferase 3	chr19:5307894:5308739:+	1	5308134-5308191
65103	Arl6ip6	Mus musculus adult male tongue cDNA, RIKEN full-length enriched library, clone:2310057C01 product:unclassifiable, full insert sequence.	chr2:53076422:53078255:+	2	53077566-53077604,53076936-53076982
15525	AK038627	Mus musculus adult male hypothalamus cDNA, RIKEN full-length enriched library, clone:A230051H13 product:heat shock 70 kDa protein 4, full insert sequence.	chr11:53073316:53075113:-	6	53074151-53074274,53073459-53073540,53074282-53074396,53073777-53073900,53073905-53074018,53074480-53074549
18821	Pln	cardiac phospholamban	chr10:53063828:53065805:+	9	53065368-53065427,53065281-53065350,53063891-53063997,53065480-53065602,53065093-53065167,53064559-53064632,53064251-53064337,53063757-53063879,53063999-53064057
11303	Abca1	ATP-binding cassette sub-family A member 1	chr4:53043661:53046814:-	2	53046070-53046160,53043671-53043724
56632	Sphk2	sphingosine kinase 2	chr7:52965631:52966094:-	1	52965708-52965761
11992	Auh	methylglutaconyl-CoA hydratase, mitochondrial	chr13:52930479:52930842:-	2	52930594-52930633,52930687-52930762
268741	Tox4	TOX high mobility group box family member 4	chr14:52912936:52915184:+	1	52912961-52913040
76338	Rab2b	ras-related protein Rab-2B	chr14:52881446:52883384:-	2	52881929-52881988,52881720-52881783
67542	Cog6	conserved oligomeric Golgi complex subunit 6	chr3:52786045:52786965:-	1	52786264-52786329
114741	Supt16h	FACT complex subunit SPT16	chr14:52780094:52781351:-	1	52780163-52780281
20657	Sod3	extracellular superoxide dismutase [Cu-Zn]	chr5:52759955:52760977:+	4	52760096-52760143,52760435-52760499,52760501-52760579,52760252-52760318
20963	Syk	Mus musculus ES cells cDNA, RIKEN full-length enriched library, clone:C330013E14 product:spleen tyrosine kinase, full insert sequence.	chr13:52741164:52744161:+	1	52743083-52743141
319322	Sf3b2	splicing factor 3b, subunit 2	chr19:5273932:5274455:-	2	5274088-5274197,5274338-5274457
71755	Dhdh	trans-1,2-dihydrobenzene-1,2-diol dehydrogenase	chr7:52728933:52730635:-	1	52730502-52730619
52440	Tax1bp1	SubName: Full=Putative uncharacterized protein Tax1bp1;	chr6:52716068:52716771:+	1	52716251-52716289
98682	Mfsd6	major facilitator superfamily domain-containing	chr1:52713148:52715185:-	1	52714126-52714172
14936	Gys1	glycogen [starch] synthase, muscle	chr7:52710737:52711987:+	1	52711122-52711184
94186	Strn3	striatin-3 isoform 1	chr12:52710629:52711089:-	4	52711059-52711138,52710743-52710855,52710867-52710937,52710639-52710740
15381	Hnrnpc	heterogeneous nuclear ribonucleoproteins C1/C2	chr14:52694474:52694754:-	1	52694526-52694582
56324	Stam2	signal transducing adapter molecule 2	chr2:52547725:52550227:-	3	52548638-52548687,52549872-52549917,52549205-52549268
29811	Ndrg2	protein NDRG2 isoform 1	chr14:52524946:52525814:-	4	52524967-52525081,52525594-52525674,52525304-52525429,52525451-52525577
17936	Nab1	NGFI-A-binding protein 1	chr1:52512694:52516061:-	4	52514863-52514913,52515075-52515144,52515203-52515246,52515647-52515686
58875	Hibadh	3-hydroxyisobutyrate dehydrogenase,	chr6:52496224:52496897:-	4	52496693-52496811,52496313-52496403,52496416-52496511,52496840-52496882
330941	AI593442	hypothetical protein LOC330941 isoform 2	chr9:52481147:52485780:-	1	52485693-52485734
217558	G2e3	G2/M phase-specific E3 ubiquitin-protein ligase	chr12:52473709:52474758:+	1	52474178-52474220
72961	Slc17a7	vesicular glutamate transporter 1	chr7:52430414:52431508:+	1	52431234-52431287
233210	Prr12	SubName: Full=Prr12 protein; SubName: Full=Putative uncharacterized protein;	chr7:52283077:52283847:-	3	52283231-52283282,52283176-52283224,52283506-52283542
75423	Arl5a	ADP-ribosylation factor-like protein 5A	chr2:52253471:52257903:-	6	52257200-52257258,52254843-52254940,52256330-52256418,52255665-52255708,52257283-52257384,52257565-52257618
14660	Gls	glutaminase isoform 1	chr1:52220294:52223001:-	9	52222602-52222671,52220795-52220853,52220550-52220603,52222693-52222751,52221309-52221356,52222375-52222447,52222837-52222916,52220618-52220719,52221946-52222015
20846	Stat1	Mus musculus adult male colon cDNA, RIKEN full-length enriched library, clone:9030611B09 product:signal transducer and activator of transcription 1, full insert sequence.	chr1:52216141:52218707:+	1	52216806-52216859
208650	Cblb	Mus musculus 9.5 days embryo parthenogenote cDNA, RIKEN full-length enriched library, clone:B130018P07 product:hypothetical protein, full insert sequence.	chr16:52204805:52208159:+	6	52205493-52205563,52205061-52205178,52205932-52205997,52206603-52206658,52205193-52205262,52204968-52205016
22333	Vdac1	voltage-dependent anion-selective channel	chr11:52202025:52202898:+	5	52202058-52202172,52202336-52202440,52202526-52202628,52202447-52202514,52202215-52202335
52014	Nus1	nogo-B receptor precursor	chr10:52156473:52159996:+	3	52156612-52156685,52157898-52158008,52156776-52156823
11771	Ap2a1	AP-2 complex subunit alpha-1 isoform a	chr7:52155743:52156107:-	2	52156098-52156151,52155888-52155950
56458	Foxo1	forkhead box protein O1	chr3:52150918:52154031:+	9	52152076-52152150,52151688-52151768,52151993-52152052,52151886-52151939,52151254-52151292,52152166-52152210,52152708-52152780,52151787-52151872,52151343-52151397
330260	Pon2	serum paraoxonase/arylesterase 2	chr6:5214624:5215320:-	1	5215039-5215130
84113	Ptov1	Mus musculus 18-day embryo whole body cDNA, RIKEN full-length enriched library, clone:1110030G05 product:prostate tumor over expressed gene 1, full insert sequence.	chr7:52118438:52118802:-	1	52118442-52118511
18226	Nup62	nuclear pore glycoprotein p62	chr7:52085513:52086176:+	1	52085620-52085687
21402	Skp1a	S-phase kinase-associated protein 1	chr11:52059522:52060360:+	4	52059497-52059600,52059885-52059963,52059729-52059796,52059674-52059715
94221	Gopc	Golgi-associated PDZ and coiled-coil	chr10:52056888:52059528:-	1	52058671-52058722
66686	Dcbld1	Mus musculus 0 day neonate skin cDNA, RIKEN full-length enriched library, clone:4631413K11 product:hypothetical LCCL domain/CUB domain containing protein, full insert sequence.	chr10:52039802:52041183:+	1	52040847-52040893
101568	Vrk3	inactive serine/threonine-protein kinase VRK3	chr7:52032592:52032884:+	1	52032701-52032751
19052	Ppp2ca	serine/threonine-protein phosphatase 2A	chr11:51935476:51936251:+	3	51935987-51936052,51935881-51935986,51935694-51935770
19684	Rdx	radixin isoform b	chr9:51894584:51896843:+	10	51894571-51894626,51894702-51894818,51894873-51894950,51895767-51895864,51895421-51895457,51895283-51895368,51894951-51895069,51895645-51895764,51895540-51895635,51895165-51895282
20230	Satb1	DNA-binding protein SATB1	chr17:51875513:51879222:-	6	51878809-51878844,51878718-51878772,51877317-51877360,51878291-51878376,51877267-51877308,51878447-51878516
19017	PGC-1v	Mus musculus PGC-1v mRNA for PPAR gamma coactivator variant form, complete cds.	chr5:51845489:51849522:-	12	51846504-51846559,51849006-51849126,51846870-51846962,51848233-51848276,51848361-51848407,51847004-51847088,51847600-51847652,51848518-51848580,51846567-51846618,51848032-51848082,51847783-51847819,51848418-51848517
17912	Myo1b	myosin-Ib isoform 1	chr1:51806616:51808016:-	3	51807901-51807959,51807384-51807433,51807720-51807802
22210	Ube2b	ubiquitin-conjugating enzyme E2 B	chr11:51798649:51800183:-	5	51799182-51799266,51800073-51800181,51799891-51799960,51799543-51799624,51799431-51799540
20354	Sema4d	semaphorin-4D precursor	chr13:51796617:51797977:-	1	51797876-51797923
19357	Rad21	double-strand-break repair protein rad21	chr15:51794151:51795601:-	7	51794149-51794211,51795565-51795604,51795241-51795281,51795009-51795069,51794218-51794314,51795119-51795175,51794516-51794576
52626	Cdkn2aipnl	CDKN2AIP N-terminal-like protein	chr11:51789413:51790836:+	3	51790521-51790569,51789881-51789934,51789764-51789817
407821	Znrf3	RecName: Full=Zinc/RING finger protein 3; Flags: Precursor;	chr11:5176332:5179726:-	4	5177521-5177569,5176876-5176916,5177821-5177868,5179393-5179455
69683	2310044H10Rik	RIKEN cDNA 2310044H10	chr7:51745309:51746241:-	4	51745975-51746061,51745434-51745492,51745863-51745966,51745497-51745587
78581	Utp23	rRNA-processing protein UTP23 homolog	chr15:51714083:51716160:+	2	51716003-51716040,51714334-51714373
269823	Pon3	serum paraoxonase/lactonase 3	chr6:5170852:5171563:-	1	5171254-5171376
67515	Ttc33	tetratricopeptide repeat protein 33	chr15:5167503:5168332:+	3	5167769-5167892,5167511-5167622,5168000-5168113
244867	Arhgap20	RecName: Full=Rho GTPase-activating protein 20; AltName: Full=RA and RhoGAP domain-containing protein; Short=RARhoGAP; AltName: Full=Rho-type GTPase-activating protein 20;	chr9:51658504:51661164:+	5	51660794-51660867,51661011-51661065,51660478-51660519,51660651-51660706,51660707-51660749
20981	Syt3	synaptotagmin-3	chr7:51654906:51655400:+	2	51655303-51655365,51655159-51655245
76901	Phf15	protein Jade-2	chr11:51626958:51630396:-	4	51627169-51627225,51630226-51630262,51627073-51627163,51628430-51628468
66397	Sar1b	GTP-binding protein SAR1b	chr11:51604945:51605455:+	1	51604991-51605047
109019	Nabp1	Mus musculus adult male testis cDNA, RIKEN full-length enriched library, clone:4930434H03 product:similar to HYPOTHETICAL 22.3 KDA PROTEIN (UNKNOWN) (PROTEIN FOR MGC:2731) [Homo sapiens], full insert sequence.	chr1:51526332:51528088:-	4	51526667-51526748,51526878-51526949,51527763-51527802,51527699-51527754
108664	Atp6v1h	V-type proton ATPase subunit H	chr1:5152246:5152630:+	1	5152342-5152388
77371	Sec24a	Mus musculus 10 days neonate skin cDNA, RIKEN full-length enriched library, clone:4732496L22 product:PROTEIN TRANSPORT PROTEIN SEC24A (SEC24-RELATED PROTEIN A) (FRAGMENT) homolog [Homo sapiens], full insert sequence.	chr11:51505765:51508628:-	3	51507320-51507359,51507817-51507872,51505805-51505848
433586	Maml3	mastermind-like 3	chr3:51491537:51493775:-	1	51491657-51491694
18760	Prkd1	serine/threonine-protein kinase D1	chr12:51442219:51442988:-	1	51442770-51442833
15384	Hnrnpab	heterogeneous nuclear ribonucleoprotein A/B	chr11:51413602:51414909:-	4	51413631-51413730,51413792-51413873,51414223-51414277,51414686-51414757
53379	Hnrnpa2b1	heterogeneous nuclear ribonucleoproteins A2/B1	chr6:51410434:51413253:-	4	51412791-51412840,51413084-51413125,51412965-51413024,51412882-51412960
20324	Sdpr	serum deprivation-response protein	chr1:51358266:51359804:+	4	51358440-51358475,51358772-51358813,51359182-51359226,51359495-51359557
107975	Pacs1	phosphofurin acidic cluster sorting protein 1	chr19:5133685:5134909:-	4	5134170-5134284,5134043-5134156,5134294-5134335,5134424-5134512
73251	Setd7	histone-lysine N-methyltransferase SETD7	chr3:51319240:51325228:-	7	51322272-51322320,51321886-51321956,51324530-51324580,51319325-51319415,51319629-51319683,51323888-51323935,51322546-51322610
105787	Prkaa1	5'-AMP-activated protein kinase catalytic	chr15:5128932:5131899:+	3	5130754-5130864,5130900-5130953,5129493-5129539
74838	Naa15	N-alpha-acetyltransferase 15, NatA auxiliary	chr3:51276722:51279906:+	3	51279742-51279782,51278603-51278720,51277158-51277211
20729	Spin1	spindlin-1 isoform 2	chr13:51244530:51247915:+	7	51247188-51247251,51245317-51245377,51246373-51246471,51246297-51246367,51245654-51245709,51245811-51245875,51246029-51246065
225115	Svil	Mus musculus archvillin (Svil) mRNA, complete cds, alternatively spliced.	chr18:5118430:5119288:+	5	5119217-5119257,5118837-5118963,5119062-5119159,5118967-5119061,5118466-5118511
16594	Klc2	kinesin light chain 2	chr19:5107746:5108604:-	1	5108194-5108240
69257	Elf2	ETS-related transcription factor Elf-2	chr3:51059587:51060282:-	1	51059602-51059658
12457	Ccrn4l	nocturnin	chr3:51054454:51055576:+	5	51055104-51055183,51055211-51055257,51054614-51054664,51054783-51054831,51054974-51055073
76308	Rab1b	ras-related protein Rab-1B	chr19:5099207:5100377:-	2	5099327-5099453,5099673-5099731
74194	Rnd3	rho-related GTP-binding protein RhoE precursor	chr2:50985959:50987813:-	3	50986234-50986294,50986924-50987011,50987023-50987081
84035	kremen	Mus musculus kremen mRNA for kringle-containing transmembrane protein, complete cds.	chr11:5091556:5094955:-	4	5092151-5092214,5092081-5092140,5094365-5094409,5094614-5094717
72238	Tbc1d5	TBC1 domain family member 5	chr17:50872452:50875269:-	1	50873178-50873228
170644	Ubn1	Mus musculus 10 days embryo whole body cDNA, RIKEN full-length enriched library, clone:2610108L02 product:ubinuclein 1, full insert sequence.	chr16:5084198:5086378:+	3	5086084-5086130,5086254-5086313,5085848-5085890
235344	Sik2	serine/threonine-protein kinase SIK2	chr9:50700906:50701463:-	1	50701129-50701185
78755	Fam122b	family with sequence similarity 122, member B	chrX:50596611:50599322:-	2	50598176-50598286,50597057-50597114
68721	1110032A03Rik	hypothetical protein LOC68721	chr9:50570933:50571960:-	2	50571904-50571950,50571299-50571335
320817	Atad2b	SubName: Full=Putative uncharacterized protein;	chr12:5050853:5054216:+	3	5053537-5053579,5051831-5051889,5050961-5051014
13063	Cycs	cytochrome c, somatic	chr6:50512562:50515235:-	2	50513896-50513960,50513969-50514027
330938	Dixdc1	dixin	chr9:50470860:50474299:-	1	50472900-50472937
235339	Dlat	dihydrolipoyllysine-residue acetyltransferase	chr9:50442740:50444529:-	7	50442898-50442933,50443832-50443880,50443689-50443729,50443041-50443129,50443160-50443220,50444447-50444504,50443301-50443375
66925	Sdhd	succinate dehydrogenase [ubiquinone] cytochrome	chr9:50404446:50405189:-	5	50405014-50405075,50405119-50405219,50404549-50404599,50404948-50405013,50404738-50404801
15452	Hprt	hypoxanthine-guanine phosphoribosyltransferase	chrX:50374291:50374837:+	2	50374302-50374382,50374410-50374528
19286	Pts	6-pyruvoyl tetrahydrobiopterin synthase	chr9:50329722:50330317:-	2	50330085-50330148,50330160-50330246
106869	Tnfaip8	tumor necrosis factor alpha-induced protein 8	chr18:50250419:50251433:+	2	50250525-50250605,50250681-50250771
71720	Osbpl3	oxysterol-binding protein-related protein 3	chr6:50243326:50247063:-	5	50243567-50243642,50243652-50243715,50243343-50243424,50245884-50245929,50245973-50246034
216724	Rufy1	RUN and FYVE domain-containing protein 1	chr11:50202805:50203316:-	1	50202870-50202951
59013	Hnrph1	Mus musculus 15 days embryo head cDNA, RIKEN full-length enriched library, clone:D930007N12 product:heterogeneous nuclear ribonucleoprotein H1, full insert sequence.	chr11:50199279:50200030:+	1	50199293-50199350
70508	Bbx	HMG box transcription factor BBX	chr16:50191958:50197671:-	6	50194943-50194983,50194841-50194941,50195773-50195874,50192943-50192980,50194986-50195064,50196405-50196450
74022	Glyr1	putative oxidoreductase GLYR1 isoform 1	chr16:5013995:5015620:-	3	5014296-5014347,5015307-5015381,5014393-5014448
109129	Mmadhc	methylmalonic aciduria and homocystinuria type D	chr2:50135401:50135727:-	3	50135569-50135608,50135455-50135510,50135680-50135731
76438	Rftn1	raftlin	chr17:50132632:50133479:-	2	50133337-50133449,50132668-50132785
240283	Dxml1	Mus musculus adult male hippocampus cDNA, RIKEN full-length enriched library, clone:C630007L23 product:X-LIKE 1 PROTEIN homolog [Homo sapiens], full insert sequence.	chr18:50122051:50124739:+	5	50122168-50122247,50122299-50122342,50123216-50123251,50122527-50122611,50122710-50122761
12330	Canx	calnexin precursor	chr11:50107459:50109783:-	12	50108612-50108694,50108107-50108162,50109547-50109629,50109684-50109788,50108820-50108925,50108702-50108816,50109334-50109397,50107991-50108105,50109023-50109091,50108465-50108585,50108308-50108421,50109196-50109314
18412	Sqstm1	sequestosome-1	chr11:50013654:50014291:-	4	50014086-50014208,50013858-50013973,50013658-50013783,50014215-50014337
76795	mKIAA0676	Mus musculus adult male urinary bladder cDNA, RIKEN full-length enriched library, clone:9530051E06 product:hypothetical EF-hand structure containing protein, full insert sequence.	chr11:49984909:49986287:+	1	49985543-49985580
68857	Dtwd2	DTW domain-containing protein 2 isoform 1	chr18:49856468:49857983:-	1	49857708-49857752
70646	Naa30	N-alpha-acetyltransferase 30, NatC catalytic	chr14:49807362:49810706:+	2	49807322-49807363,49807453-49807536
18295	Ogn	mimecan precursor	chr13:49718352:49719869:+	4	49718773-49718826,49719654-49719689,49719130-49719187,49718414-49718480
74385	Mudeng	MHD domain-containing death-inducing protein	chr14:49706002:49707398:+	1	49706243-49706329
14030	Ewsr1	RNA-binding protein EWS	chr11:4969691:4970066:-	1	4969826-4969906
26420	Mapk9	mitogen-activated protein kinase 9 isoform	chr11:49696660:49699923:+	5	49697378-49697489,49699092-49699158,49699865-49699919,49699417-49699453,49697041-49697129
109331	Rnf20	SubName: Full=Ring finger protein 20; Flags: Fragment;	chr4:49668849:49669758:+	1	49669039-49669100
14584	Gfpt2	glucosamine--fructose-6-phosphate	chr11:49651267:49652122:+	3	49651637-49651675,49651736-49651808,49651824-49651861
105504	Exoc5	exocyst complex component 5	chr14:49631819:49633835:-	2	49632364-49632407,49632309-49632356
16574	Kif5c	kinesin heavy chain isoform 5C	chr2:49626684:49630298:+	2	49628141-49628196,49629999-49630052
67063	2810432L12Rik	transmembrane protein C9orf125 homolog	chr4:49597378:49598826:-	3	49598471-49598543,49598251-49598304,49598685-49598731
76441	Daam2	Mus musculus adult male tongue cDNA, RIKEN full-length enriched library, clone:2310016D11 product:hypothetical Formin Homology 2 Domain containing protein, full insert sequence.	chr17:49595347:49597850:-	6	49596733-49596791,49597327-49597384,49595601-49595636,49597245-49597282,49597709-49597749,49597579-49597646
28028	Mrpl50	39S ribosomal protein L50, mitochondrial	chr4:49525469:49527061:-	2	49525779-49525841,49525525-49525603
104625	BC079836	Mus musculus adult male hypothalamus cDNA, RIKEN full-length enriched library, clone:A230103N10 product:unclassifiable, full insert sequence.	chr11:49488212:49488694:-	1	49488415-49488450
76895	Bicd2	protein bicaudal D homolog 2 isoform 3	chr13:49478721:49482394:+	6	49480533-49480602,49481294-49481369,49482074-49482145,49480830-49480900,49481216-49481258,49480718-49480827
14257	Flt4	vascular endothelial growth factor receptor 3	chr11:49464585:49466239:+	1	49465908-49465961
11764	Ap1b1	AP-1 complex subunit beta-1	chr11:4941795:4942732:+	1	4942317-4942366
71648	Optn	optineurin	chr2:4941688:4942274:-	4	4942153-4942207,4941687-4941745,4941763-4941802,4942026-4942072
66911	Nudt16l1	protein syndesmos	chr16:4940417:4941025:+	1	4940863-4940971
227867	Epc2	enhancer of polycomb homolog 2	chr2:49405518:49407129:+	1	49406467-49406528
14735	Gpc4	glypican-4 precursor	chrX:49406196:49406697:-	3	49406449-49406485,49406323-49406445,49406506-49406578
17237	Mgrn1	E3 ubiquitin-protein ligase MGRN1	chr16:4936896:4938296:+	6	4937821-4937861,4937054-4937090,4937158-4937193,4937205-4937244,4937705-4937812,4937588-4937644
101214	Tra2a	transformer-2 protein homolog alpha	chr6:49193920:49194719:-	1	49194389-49194426
17308	Mgat1	alpha-1,3-mannosyl-glycoprotein	chr11:49075537:49076526:+	3	49076297-49076368,49075633-49075700,49075890-49075967
218236	Fam120a	constitutive coactivator of PPAR-gamma-like	chr13:48974586:48976164:-	7	48974891-48974954,48975613-48975655,48975041-48975097,48975272-48975334,48975690-48975748,48975188-48975240,48975382-48975448
52357	BC040690	Mus musculus adult male eyeball cDNA, RIKEN full-length enriched library, clone:7530433O15 product:expressed sequence AU022508, full insert sequence.	chr8:48912964:48914071:-	2	48913663-48913708,48913938-48913992
18676	Phf2	PHD finger protein 2	chr13:48897119:48898967:-	3	48897481-48897555,48897295-48897339,48897588-48897686
26951	Zw10	Mus musculus adult male medulla oblongata cDNA, RIKEN full-length enriched library, clone:6330566F14 product:hypothetical protein, full insert sequence.	chr9:48886424:48886878:+	1	48886657-48886707
93834	Peli2	protein pellino homolog 2	chr14:48876257:48880558:+	1	48877968-48878009
235323	Usp28	ubiquitin carboxyl-terminal hydrolase 28	chr9:48849654:48850622:+	2	48849661-48849707,48849748-48849822
65963	Tmem176b	transmembrane protein 176B	chr6:48783813:48784051:-	1	48783883-48783946
11480	Acvr2a	activin receptor type-2A precursor	chr2:48755308:48758784:+	6	48755778-48755848,48756011-48756072,48757728-48757803,48757923-48758012,48757098-48757167,48757043-48757096
69260	Ing2	inhibitor of growth protein 2	chr8:48752532:48754019:-	1	48753184-48753220
231931	Gimap6	GTPase IMAP family member 6	chr6:48651582:48652181:-	2	48651602-48651665,48651797-48651854
192174	Rwdd4a	Mus musculus adult male lung cDNA, RIKEN full-length enriched library, clone:1200004E20 product:hypothetical protein, full insert sequence.	chr8:48636081:48638191:+	8	48637467-48637577,48637275-48637322,48637799-48637873,48637203-48637272,48637878-48637922,48637638-48637687,48637412-48637455,48637983-48638038
233168	AI987944	hypothetical protein LOC233168 isoform 2	chr7:48629158:48629711:-	1	48629566-48629629
56464	Ctsf	cathepsin F precursor	chr19:4860465:4860912:+	1	4860640-4860684
16922	Phyh	phytanoyl-CoA dioxygenase, peroxisomal	chr2:4859406:4859789:+	1	4859652-4859771
66665	5730528L13Rik	hypothetical protein LOC66665	chr4:48574125:48574791:+	1	48574122-48574202
106821	AI314976	hypothetical protein LOC106821	chr17:48556111:48556591:+	1	48556235-48556280
58887	Repin1	replication initiator 1	chr6:48547943:48549081:+	1	48548367-48548415
18044	Nfya	nuclear transcription factor Y subunit alpha	chr17:48526210:48528613:-	1	48526704-48526744
243371	Lrrc61	leucine-rich repeat-containing protein 61	chr6:48519023:48520721:+	2	48519526-48519566,48519195-48519245
235320	Zbtb16	zinc finger and BTB domain-containing protein	chr9:48462402:48465246:-	12	48464569-48464618,48464885-48464952,48464361-48464424,48463166-48463292,48462792-48462841,48463409-48463449,48463764-48463846,48463295-48463408,48462407-48462496,48463848-48463942,48462584-48462637,48463592-48463645
72065	Rap2c	ras-related protein Rap-2c precursor	chrX:48357091:48359927:-	7	48357925-48358000,48357670-48357747,48357484-48357541,48359408-48359467,48359040-48359101,48358845-48358953,48358351-48358431
16709	Ktn1	kinectin	chr14:48355775:48356239:+	2	48355839-48355909,48356114-48356173
18777	Lypla1	acyl-protein thioesterase 1	chr1:4835097:4836816:+	4	4835384-4835502,4835571-4835631,4835510-4835557,4835164-4835220
109079	Sephs1	selenide, water dikinase 1	chr2:4827841:4831602:+	1	4828161-4828221
104444	Rexo2	oligoribonuclease, mitochondrial precursor	chr9:48276619:48276921:-	1	48276672-48276775
76299	Erp44	endoplasmic reticulum resident protein 44	chr4:48206203:48207479:-	1	48206595-48206650
67727	Stx17	SubName: Full=Putative uncharacterized protein; SubName: Full=Syntaxin 17; SubName: Full=Syntaxin 17, isoform CRA_b;	chr4:48194610:48199378:+	4	48195507-48195562,48197894-48197946,48198385-48198484,48195846-48195924
218978	n/a	n/a	chr14:48160569:48162511:-	1	48162097-48162132
18647	Cdk14	SubName: Full=Pftk1 protein; SubName: Full=Putative uncharacterized protein;	chr5:4803385:4806731:-	2	4803404-4803449,4806420-4806485
56275	Rbm14	Mus musculus adult male liver cDNA, RIKEN full-length enriched library, clone:1300007E16 product:RNA binding motif protein 14, full insert sequence.	chr19:4800925:4801597:-	2	4801137-4801177,4801353-4801408
218975	Mapk1ip1l	MAPK-interacting and spindle-stabilizing	chr14:47939098:47942766:+	6	47939293-47939331,47939612-47939663,47942145-47942181,47939553-47939593,47942578-47942630,47941414-47941465
67296	Socs4	suppressor of cytokine signaling 4	chr14:47910595:47911266:+	1	47911143-47911206
19653	Rbm4b	RNA-binding protein 4B	chr19:4784293:4785567:-	2	4785332-4785396,4785524-4785570
107971	Frs3	fibroblast growth factor receptor substrate 3	chr17:47840811:47841235:+	1	47841029-47841132
272347	Zfp398	SubName: Full=Putative uncharacterized protein;	chr6:47816946:47818256:+	1	47817336-47817389
67788	6330577E15Rik	hypothetical protein LOC67788	chr19:47809508:47810078:+	1	47809791-47809841
56771	Med20	mediator of RNA polymerase II transcription	chr17:47760049:47761367:+	1	47760139-47760179
53414	Bysl	bystin	chr17:47736280:47738501:-	1	47738143-47738184
12445	Ccnd3	G1/S-specific cyclin-D3	chr17:47735725:47736637:+	1	47736120-47736176
74480	Samd4	protein Smaug homolog 1 isoform 1	chr14:47721134:47725492:+	10	47721299-47721369,47723824-47723865,47725072-47725183,47721758-47721848,47724946-47725001,47724240-47724307,47724619-47724685,47724838-47724901,47724316-47724370,47724092-47724144
20874	Slk	STE20-like serine/threonine-protein kinase	chr19:47716583:47719735:+	4	47718550-47718602,47719203-47719252,47718990-47719054,47717870-47717988
66626	5730403B10Rik	LITAF-like protein	chr16:4765461:4768537:-	5	4767786-4767841,4767410-4767500,4767651-4767762,4767554-4767604,4767080-4767126
66704	Rbm4b	RNA-binding protein 4B	chr19:4765344:4765940:+	1	4765505-4765559
63856	Taf8	transcription initiation factor TFIID subunit 8	chr17:47624999:47626832:-	1	47626662-47626700
14081	Acsl1	long-chain-fatty-acid--CoA ligase 1	chr8:47619834:47621404:+	7	47620841-47620898,47620529-47620591,47621091-47621197,47620000-47620059,47620375-47620430,47620127-47620231,47621201-47621322
56737	Alg2	alpha-1,3-mannosyltransferase ALG2	chr4:47482705:47484430:-	2	47482845-47482945,47482756-47482808
63985	Gmfb	glia maturation factor beta	chr14:47427824:47431426:-	5	47430819-47430887,47428675-47428710,47428847-47428907,47429834-47429900,47429270-47429356
21812	Tgfbr1	TGF-beta receptor type-1	chr4:47423649:47427796:+	5	47427520-47427557,47427255-47427309,47427414-47427499,47424365-47424437,47425924-47425995
20358	Sema6a	semaphorin-6A precursor	chr18:47404908:47408036:-	1	47405975-47406033
12793	Cnih	protein cornichon homolog	chr14:47395242:47396196:-	2	47395366-47395418,47395752-47395828
218215	Rnf144b	E3 ubiquitin-protein ligase RNF144B	chr13:47339870:47341845:+	2	47341435-47341481,47341236-47341274
11739	Slc25a4	ADP/ATP translocase 1	chr8:47292698:47292816:-	1	47292771-47292888
66756	4933411K20Rik	hypothetical protein LOC66756	chr8:47278066:47280944:+	4	47278870-47278931,47278393-47278518,47280111-47280164,47279561-47279622
110052	Dek	protein DEK	chr13:47180137:47181436:-	2	47180921-47181023,47181158-47181221
105193	Nhlrc1	E3 ubiquitin-protein ligase NHLRC1	chr13:47107927:47108942:-	2	47107957-47108040,47108502-47108561
83945	Dnaja3	dnaJ homolog subfamily A member 3, mitochondrial	chr16:4706568:4707690:+	1	4706590-4706637
224826	Ubr2	E3 ubiquitin-protein ligase UBR2 isoform 1	chr17:47065240:47067307:-	4	47065688-47065789,47065887-47065933,47065792-47065884,47065366-47065482
53318	Pdlim3	PDZ and LIM domain protein 3	chr8:47004368:47004900:+	1	47004498-47004540
76952	Nt5c2	cytosolic purine 5'-nucleotidase isoform 3	chr19:46961321:46963541:-	3	46962767-46962837,46963003-46963063,46962722-46962760
242291	Impad1	inositol monophosphatase 3	chr4:4691501:4694850:-	7	4692060-4692159,4692507-4692561,4691505-4691584,4693079-4693132,4692875-4692985,4691594-4691657,4691920-4692036
234214	Sorbs2	RecName: Full=Sorbin and SH3 domain-containing protein 2; AltName: Full=Arg/Abl-interacting protein 2; Short=ArgBP2;	chr8:46911160:46913258:+	11	46911994-46912093,46912293-46912405,46912158-46912200,46911096-46911186,46911870-46911991,46912591-46912636,46911737-46911861,46912488-46912539,46912638-46912748,46912094-46912143,46911571-46911660
67526	Atg12	ubiquitin-like protein ATG12	chr18:46892071:46894103:-	7	46893124-46893243,46892554-46892630,46892778-46892888,46892650-46892691,46892197-46892238,46893607-46893699,46893502-46893572
227059	Slc39a10	zinc transporter ZIP10 precursor	chr1:46864389:46866797:-	1	46864769-46864808
16553	Kif13a	SubName: Full=Putative uncharacterized protein;	chr13:46844457:46845974:-	4	46845492-46845596,46844544-46844653,46844463-46844521,46844668-46844773
240185	9430020K01Rik	hypothetical protein LOC240185	chr18:4680258:4682867:+	4	4681376-4681441,4681046-4681115,4680768-4680843,4680992-4681040
24052	Sgcd	delta-sarcoglycan	chr11:46792285:46792764:-	1	46792605-46792682
66439	2010012O05Rik	hypothetical protein LOC66439	chr19:46776056:46777872:+	2	46776480-46776583,46776404-46776467
218210	Nup153	nucleoporin 153	chr13:46775271:46776526:-	4	46775727-46775802,46776107-46776166,46776040-46776089,46776238-46776274
67252	Cap2	adenylyl cyclase-associated protein 2	chr13:46743733:46745647:+	8	46744417-46744501,46744165-46744224,46744998-46745109,46744055-46744125,46744878-46744962,46743919-46743968,46744688-46744810,46743789-46743864
226178	D19Wsu162e	outcome predictor in acute leukemia 1 homolog	chr19:46729209:46731874:+	8	46730625-46730700,46730703-46730768,46731675-46731734,46730045-46730137,46729865-46729926,46730206-46730290,46730782-46730885,46730150-46730203
20807	Srf	serum response factor	chr17:46683788:46686031:-	3	46684624-46684665,46683908-46683992,46684003-46684080
18016	Nf2	Mus musculus 6 days neonate head cDNA, RIKEN full-length enriched library, clone:5430425O19 product:neurofibromatosis 2, full insert sequence.	chr11:4665851:4668225:-	5	4667148-4667196,4666819-4666863,4667901-4667949,4667308-4667386,4668045-4668082
94279	Sfxn2	sideroflexin-2	chr19:46669261:46671390:+	1	46671309-46671349
240263	Fem1c	protein fem-1 homolog C	chr18:46664260:46664733:-	1	46664341-46664438
93679	Trim8	probable E3 ubiquitin-protein ligase TRIM8	chr19:46590156:46590945:+	1	46590112-46590175
666794	Rbm24	RNA-binding protein 24	chr13:46524686:46526468:+	6	46524930-46524983,46525008-46525122,46525935-46526006,46525181-46525245,46526055-46526174,46525289-46525354
142980	Tlr3	toll-like receptor 3 precursor	chr8:46481019:46482266:-	1	46481280-46481350
225467	Pggt1b	geranylgeranyl transferase type-1 subunit beta	chr18:46399603:46401173:-	2	46400408-46400508,46400863-46400964
209224	Enox2	ecto-NOX disulfide-thiol exchanger 2	chrX:46363699:46364679:-	1	46363801-46363851
56055	Gtpbp2	Mus musculus putative GTP-binding protein (Gtpbp2) mRNA, complete cds.	chr17:46305271:46306318:+	4	46305865-46305917,46306013-46306050,46305937-46306012,46306084-46306196
114874	Ddhd1	RecName: Full=Phospholipase DDHD1; EC=3.1.1.-; AltName: Full=DDHD domain-containing protein 1; AltName: Full=Phosphatidic acid-preferring phospholipase A1 homolog; Short=PA-PLA1;	chr14:46212849:46215157:-	1	46214940-46215013
22339	Vegfa	vascular endothelial growth factor A isoform 4	chr17:46153943:46155806:-	5	46155302-46155391,46154031-46154077,46154814-46154891,46154405-46154529,46154714-46154811
14107	Fat1	FAT tumor suppressor homolog 1	chr8:46136763:46137611:+	4	46137119-46137184,46136932-46136984,46137487-46137547,46137185-46137255
272027	Tstd2	thiosulfate sulfurtransferase/rhodanese-like	chr4:46127619:46129716:-	4	46128813-46128862,46127750-46127792,46128405-46128459,46128341-46128402
21916	Tmod1	tropomodulin-1	chr4:46127250:46128904:+	2	46127686-46127727,46127293-46127400
209707	Lcorl	ligand-dependent nuclear receptor	chr5:46121571:46124694:-	1	46123236-46123295
218952	Fermt2	fermitin family homolog 2	chr14:46078467:46079524:-	5	46078939-46079058,46078597-46078696,46079064-46079175,46078876-46078935,46079292-46079331
70661	Sik3	serine/threonine-protein kinase SIK3	chr9:46030152:46032277:+	4	46030399-46030466,46030202-46030243,46031203-46031308,46030916-46030967
76884	Cyfip2	cytoplasmic FMR1-interacting protein 2	chr11:46007360:46009801:-	10	46007393-46007447,46008628-46008686,46007673-46007708,46009379-46009470,46009472-46009539,46007526-46007581,46009306-46009344,46008056-46008095,46008564-46008613,46008861-46008903
67089	Psmc6	26S protease regulatory subunit 10B	chr14:45968376:45968746:+	1	45968431-45968471
53945	Slc40a1	solute carrier family 40 member 1	chr1:45964915:45966250:-	2	45966108-45966217,45965305-45965355
11492	Adam19	disintegrin and metalloproteinase	chr11:45957347:45960844:+	3	45960044-45960108,45960268-45960330,45958236-45958279
217517	Stxbp6	syntaxin-binding protein 6	chr12:45953473:45956840:-	1	45956693-45956773
213819	Casd1	CAS1 domain-containing protein 1 precursor	chr6:4592118:4593381:+	2	4592566-4592682,4592453-4592550
66999	Med28	mediator of RNA polymerase II transcription	chr5:45916589:45920523:+	2	45916615-45916668,45917748-45917796
50527	Ero1l	ERO1-like protein alpha precursor	chr14:45903996:45905702:-	1	45904796-45904843
208968	Zfp280c	zinc finger protein 280C isoform 3	chrX:45894803:45896450:-	3	45895996-45896045,45896103-45896202,45895435-45895470
71617	9130011E15Rik	hypothetical protein LOC71617	chr19:45892634:45893375:-	2	45892652-45892689,45892738-45892796
76055	Mgea5	RecName: Full=Bifunctional protein NCOAT; AltName: Full=Meningioma-expressed antigen 5; AltName: Full=Nuclear cytoplasmic O-GlcNAcase and acetyltransferase; Includes: RecName: Full=Beta-hexosaminidase; EC=3.2.1.52; AltName: Full=Beta-N-acetylhexosaminidase; AltName: Full=Hexosaminidase C; AltName: Full=N-acetyl-beta-D-glucosaminidase; AltName: Full=N-acetyl-beta-glucosaminidase; AltName: Full=O-G…	chr19:45824749:45826633:-	6	45826124-45826206,45825249-45825304,45825368-45825415,45826001-45826114,45826359-45826439,45825916-45825968
110391	Qdpr	dihydropteridine reductase	chr5:45825273:45825811:-	3	45825447-45825563,45825626-45825752,45825303-45825423
18475	AK011326	Mus musculus 10 days embryo whole body cDNA, RIKEN full-length enriched library, clone:2610005M20 product:hypothetical protein, full insert sequence.	chr9:45773394:45776770:-	10	45776625-45776686,45776003-45776067,45774513-45774552,45774716-45774768,45775894-45775995,45774961-45775025,45776576-45776615,45776144-45776210,45774605-45774671,45774866-45774908
56501	Elf4	ETS-related transcription factor Elf-4	chrX:45764226:45767839:-	2	45767315-45767413,45765796-45765840
320376	Bcorl1	BCL-6 corepressor-like protein 1	chrX:45759376:45759905:+	1	45759759-45759803
208177	Phldb2	pleckstrin homology-like domain family B member	chr16:45746346:45747903:-	1	45746796-45746845
214597	Sidt2	Mus musculus B6-derived CD11 +ve dendritic cells cDNA, RIKEN full-length enriched library, clone:F730311O04 product:hypothetical protein, full insert sequence.	chr9:45745958:45747336:-	3	45745993-45746080,45746826-45746922,45746968-45747080
213012	Abhd10	abhydrolase domain-containing protein 10,	chr16:45730510:45731727:-	2	45731683-45731737,45731004-45731058
216705	Clint1	RecName: Full=Clathrin interactor 1; AltName: Full=Enthoprotin; AltName: Full=Epsin-4; AltName: Full=Epsin-related protein; Short=EpsinR;	chr11:45722789:45724127:+	2	45723281-45723341,45723046-45723101
63959	Slc29a1	SubName: Full=Equilibrative nucleoside transporter 1 variant delta 11;	chr17:45722171:45722619:-	1	45722222-45722315
15516	Hsp90ab1	heat shock protein HSP 90-beta	chr17:45704727:45704963:-	2	45704868-45704985,45704753-45704832
235315	Rnf214	RING finger protein 214	chr9:45671774:45673015:-	5	45672246-45672314,45672805-45672854,45671851-45671906,45672585-45672620,45672648-45672748
23821	Bace	Mus musculus beta-site APP cleaving enzyme (Bace) mRNA, complete cds.	chr9:45668378:45670567:+	1	45669645-45669692
20238	Atxn1	ataxin-1	chr13:45650262:45652423:-	4	45651730-45651784,45650674-45650720,45651350-45651410,45651097-45651157
66355	Gmpr	GMP reductase 1	chr13:45641422:45641750:+	1	45641524-45641621
12234	mKIAA4123	Mus musculus ubiquitin ligase FWD1 mRNA, complete cds.	chr19:45603463:45607833:+	1	45604496-45604535
208884	Zdhhc9	Mus musculus adult male olfactory brain cDNA, RIKEN full-length enriched library, clone:6430508G22 product:weakly similar to DJ50O24.4 (NOVEL PROTEIN WITH DHHC ZINC FINGER DOMAIN) [Homo sapiens], full insert sequence.	chrX:45525148:45526701:-	2	45526099-45526162,45526651-45526711
218203	Mylip	E3 ubiquitin-protein ligase MYLIP isoform 2	chr13:45505879:45507309:+	3	45506515-45506569,45506850-45506970,45506261-45506325
67229	Prpf18	pre-mRNA-splicing factor 18	chr2:4543213:4545491:-	4	4545002-4545064,4543434-4543549,4544589-4544626,4545435-4545498
67452	Pnpla8	calcium-independent phospholipase A2-gamma	chr12:45412586:45414422:+	8	45412806-45412910,45412916-45412963,45414074-45414128,45413827-45413864,45413939-45414061,45413515-45413564,45413876-45413925,45412737-45412784
230125	Mcart1	mitochondrial carrier triple repeat protein 1	chr4:45408796:45412112:-	6	45411488-45411565,45409425-45409480,45410841-45410901,45410448-45410491,45411368-45411435,45411570-45411676
242418	Dcaf10	DDB1- and CUL4-associated factor 10	chr4:45387149:45392594:+	1	45390856-45390891
17470	Cd200	OX-2 membrane glycoprotein precursor	chr16:45382248:45383570:-	2	45382886-45382979,45382547-45382661
30878	Apln	apelin precursor	chrX:45378323:45380884:-	3	45378371-45378418,45379127-45379187,45379372-45379410
209630	Frmd4a	Mus musculus 12 days embryo embryonic body between diaphragm region and neck cDNA, RIKEN full-length enriched library, clone:9430026K19 product:unclassifiable, full insert sequence.	chr2:4532115:4534988:+	1	4532263-4532325
320634	Ocrl	inositol polyphosphate 5-phosphatase OCRL-1	chrX:45316761:45319043:+	1	45317140-45317193
27362	Dnajb9	dnaJ homolog subfamily B member 9	chr12:45306884:45307940:-	4	45307135-45307202,45307230-45307286,45306979-45307041,45307455-45307520
67260	Lass4	LAG1 longevity assurance homolog 4	chr8:4523780:4526079:+	1	4524790-4524843
59095	Fxyd6	FXYD domain-containing ion transport regulator 6	chr9:45203066:45204242:+	3	45203222-45203338,45203140-45203205,45203339-45203440
74102	Slc35a5	probable UDP-sugar transporter protein SLC35A5	chr16:45139686:45142259:-	1	45141537-45141598
23828	Bves	blood vessel epicardial substance	chr10:45089115:45089514:+	2	45089380-45089427,45089241-45089319
226153	Peo1	twinkle protein, mitochondrial	chr19:45086394:45087252:+	1	45086558-45086627
226151	Fam178a	hypothetical protein LOC226151	chr19:45055081:45058277:+	9	45057614-45057702,45057260-45057326,45057894-45057945,45057799-45057893,45058077-45058133,45057432-45057542,45055919-45055962,45055973-45056016,45058156-45058197
16468	Jarid2	protein Jumonji	chr13:45015321:45016346:+	3	45015546-45015654,45016165-45016224,45016025-45016082
230119	Zbtb5	zinc finger and BTB domain-containing protein 5	chr4:45004117:45006241:-	1	45004530-45004586
399548	Scn4b	sodium channel subunit beta-4 precursor	chr9:44958587:44962144:+	4	44960382-44960449,44958872-44958930,44959483-44959571,44960222-44960300
24136	Zeb2	zinc finger E-box-binding homeobox 2 isoform 2	chr2:44839154:44844092:-	2	44843239-44843316,44839353-44839419
106393	Srl	sarcalumenin precursor	chr16:4480228:4482472:-	12	4480408-4480480,4482366-4482491,4481649-4481768,4480590-4480715,4482308-4482354,4481499-4481612,4480906-4480984,4480263-4480329,4481770-4481861,4482172-4482295,4482015-4482116,4481914-4481971
140630	Ube4a	ubiquitin conjugation factor E4 A	chr9:44731210:44733931:-	6	44731997-44732057,44733768-44733820,44731246-44731313,44732897-44732955,44733264-44733309,44731563-44731622
21954	Tnni3	troponin I, cardiac muscle	chr7:4469910:4469969:-	1	4469912-4469979
319594	Hif1an	hypoxia-inducible factor 1-alpha inhibitor	chr19:44645648:44650764:+	9	44645890-44645975,44645976-44646083,44647028-44647066,44646679-44646770,44646916-44646983,44649401-44649482,44649720-44649838,44647696-44647784,44649284-44649386
214162	All-1	Mus musculus 16 days embryo head cDNA, RIKEN full-length enriched library, clone:C130089M16 product:myeloid/lymphoid or mixed-lineage leukemia, full insert sequence.	chr9:44611438:44615984:-	5	44614381-44614476,44612457-44612562,44612326-44612363,44611684-44611787,44611924-44611998
71687	Tmem25	transmembrane protein 25 precursor	chr9:44601862:44603057:-	1	44602535-44602611
328949	Mcc	mutated in colorectal cancers isoform 2	chr18:44584714:44589540:-	1	44584942-44584989
231225	AK040452	Mus musculus 0 day neonate thymus cDNA, RIKEN full-length enriched library, clone:A430098G02 product:unclassifiable, full insert sequence.	chr5:44566401:44568191:-	2	44566520-44566589,44567188-44567242
213827	Arcn1	coatomer subunit delta	chr9:44550228:44552009:-	5	44551521-44551588,44551081-44551161,44550859-44550910,44551352-44551412,44551607-44551664
58916	Myot	myotilin	chr18:44514934:44515376:+	2	44515175-44515232,44515064-44515122
319613	Sybu	syntabulin isoform C	chr15:44503403:44504092:-	4	44503819-44503917,44504028-44504084,44503681-44503721,44503726-44503763
55960	Ebag9	receptor-binding cancer antigen expressed on	chr15:44471968:44472572:+	3	44472376-44472428,44472024-44472062,44472073-44472117
13209	AK171764	Mus musculus 0 day neonate lung cDNA, RIKEN full-length enriched library, clone:E030022I16 product:unclassifiable, full insert sequence.	chr9:44444572:44448814:+	4	44446127-44446235,44445707-44445785,44446084-44446121,44445972-44446073
329065	Scd4	stearoyl-CoA desaturase 4	chr19:44419389:44421233:+	4	44419515-44419607,44419682-44419760,44419814-44419852,44420263-44420322
224796	Clic5	chloride intracellular channel protein 5	chr17:44412330:44417117:+	4	44413088-44413149,44416128-44416195,44415897-44415948,44413153-44413207
80288	Bcl9l	B-cell CLL/lymphoma 9-like protein	chr9:44317866:44318495:+	2	44318102-44318211,44318230-44318312
12494	Cd38	ADP-ribosyl cyclase 1	chr5:44301582:44303613:+	3	44302638-44302708,44302878-44302966,44302379-44302455
79560	Ublcp1	ubiquitin-like domain-containing CTD phosphatase	chr11:44268079:44269089:-	1	44268689-44268724
223527	Eny2	enhancer of yellow 2 transcription factor	chr15:44267234:44269231:+	3	44267620-44267678,44267234-44267279,44267500-44267572
224794	Enpp4	ectonucleotide pyrophosphatase/phosphodiesterase	chr17:44233259:44236261:-	9	44233665-44233727,44235243-44235365,44236071-44236175,44235401-44235461,44235655-44235744,44233475-44233528,44235750-44235815,44233810-44233899,44233734-44233795
207806	Gm608	hypothetical protein LOC207806	chr16:44221937:44227578:+	12	44227050-44227102,44226536-44226583,44226841-44226877,44223055-44223118,44226158-44226232,44224274-44224350,44224819-44224888,44223881-44223922,44222848-44222891,44226280-44226338,44225779-44225841,44224055-44224108
12282	Hyou1	SubName: Full=Hyou1 protein;	chr9:44199133:44200451:+	8	44199300-44199355,44199542-44199654,44200293-44200333,44199375-44199416,44199850-44199935,44199744-44199794,44200107-44200166,44200173-44200251
53901	Rcan2	calcipressin-2 isoform 1	chr17:44174082:44176465:+	15	44174448-44174549,44175192-44175266,44174605-44174667,44174997-44175111,44176054-44176177,44174137-44174260,44175519-44175602,44175941-44175992,44176330-44176440,44175123-44175172,44174795-44174851,44174873-44174996,44174032-44174135,44175274-44175370,44174322-44174447
72117	Naa50	N-alpha-acetyltransferase 50, NatE catalytic	chr16:44159753:44163477:+	10	44160254-44160321,44160856-44160910,44160422-44160531,44162075-44162125,44160735-44160779,44160328-44160421,44160161-44160240,44161063-44161164,44161362-44161421,44159934-44160015
12142	Prdm1	PR domain zinc finger protein 1	chr10:44156981:44159472:-	1	44158493-44158529
12675	Chuk	inhibitor of nuclear factor kappa-B kinase	chr19:44147824:44149030:-	3	44148185-44148274,44147912-44147958,44148370-44148420
73469	Rnf38	RING finger protein 38 isoform 2	chr4:44139084:44142465:-	6	44141823-44141873,44139671-44139706,44139350-44139391,44140515-44140577,44139602-44139640,44141065-44141120
242960	Fbxl5	F-box/LRR-repeat protein 5 isoform A	chr5:44135857:44136537:-	4	44136351-44136387,44136281-44136345,44135942-44136011,44136398-44136470
102423	Hinfp	histone H4 transcription factor	chr9:44103756:44104278:-	1	44103771-44103806
11964	Atp6v1a	V-type proton ATPase catalytic subunit A	chr16:44085517:44087536:-	4	44087408-44087502,44086015-44086109,44086200-44086247,44085893-44085972
11793	Atg5	autophagy protein 5	chr10:44082858:44084097:+	3	44083625-44083673,44083725-44083839,44083488-44083542
12757	Clta	clathrin light chain A isoform a	chr4:44045444:44045718:+	1	44045510-44045620
12402	Cbl	E3 ubiquitin-protein ligase CBL	chr9:43957345:43959527:-	4	43958042-43958109,43958960-43959048,43959145-43959198,43959279-43959367
53614	Reck	reversion-inducing cysteine-rich protein with	chr4:43956237:43957678:+	2	43957329-43957386,43957419-43957480
84004	Mcam	cell surface glycoprotein MUC18 precursor	chr9:43949896:43950809:+	2	43950396-43950494,43950649-43950702
53376	Usp2	ubiquitin carboxyl-terminal hydrolase 2 isoform	chr9:43901944:43903710:+	2	43901914-43901994,43902683-43902795
106248	Qtrtd1	queuine tRNA-ribosyltransferase subunit QTRTD1	chr16:43861526:43863182:-	4	43861720-43861757,43862680-43862723,43861843-43861888,43862191-43862262
78100	8430410K20Rik	hypothetical protein LOC78100	chr9:4385314:4386869:+	4	4385542-4385616,4385907-4385968,4385634-4385669,4385444-4385494
226139	Cox15	cytochrome c oxidase assembly protein COX15	chr19:43809615:43811210:-	3	43810355-43810428,43809846-43809945,43810682-43810748
74302	mKIAA0371	Mus musculus adult male testis cDNA, RIKEN full-length enriched library, clone:1700092A20 product:myotubularin related protein 3, full insert sequence.	chr11:4380871:4382770:-	1	4381007-4381051
108841	Rdh13	retinol dehydrogenase 13	chr7:4377267:4379159:-	2	4377559-4377608,4378592-4378649
242409	Tmem8b	transmembrane protein 8B	chr4:43703234:43705539:+	1	43704242-43704286
170728	Rtn4ip1	reticulon-4-interacting protein 1, mitochondrial	chr10:43666334:43667668:+	4	43667110-43667229,43666927-43667028,43667231-43667316,43667375-43667431
56490	Zbtb20	zinc finger and BTB domain-containing protein 20	chr16:43618857:43619223:+	1	43618955-43619022
58235	Pvrl1	poliovirus receptor-related protein 1 precursor	chr9:43612099:43615544:+	2	43615364-43615405,43612487-43612540
242406	Rgp1	retrograde Golgi transport protein RGP1 homolog	chr4:43595955:43600359:+	1	43598533-43598590
76563	Qrsl1	glutamyl-tRNA(Gln) amidotransferase subunit A	chr10:43593996:43594288:-	1	43594071-43594177
224792	Gpr116	probable G-protein coupled receptor 116	chr17:43592284:43596506:+	1	43593296-43593394
11548	Adra1b	alpha-1B adrenergic receptor	chr11:43588108:43589362:-	3	43588843-43588967,43589257-43589295,43588973-43589077
14718	Got1	Mus musculus 16 days embryo heart cDNA, RIKEN full-length enriched library, clone:I920001F12 product:glutamate oxaloacetate transaminase 1, soluble, full insert sequence.	chr19:43574243:43574907:-	5	43574760-43574878,43574893-43574992,43574414-43574519,43574574-43574624,43574253-43574375
66827	Ttc1	tetratricopeptide repeat protein 1	chr11:43543508:43543975:-	1	43543700-43543761
22004	Tpm2	tropomyosin beta chain	chr4:43527584:43528792:-	2	43527733-43527826,43527989-43528111
56705	Ranbp9	ran-binding protein 9	chr13:43498042:43498927:-	4	43498212-43498265,43498272-43498364,43498365-43498417,43498565-43498633
22290	Uty	histone demethylase UTY	chrY:433587:434989:-	1	434000-434039
328232	Gfod1	glucose-fructose oxidoreductase	chr13:43290888:43295693:-	5	43291435-43291495,43292270-43292318,43293098-43293137,43291320-43291401,43295128-43295189
331623	Bend3	BEN domain-containing protein 3	chr10:43231896:43235223:+	3	43234339-43234395,43232732-43232838,43233001-43233084
30939	Pttg1	securin isoform 2	chr11:43233752:43234561:-	1	43233772-43233884
94185	Tnfrsf21	tumor necrosis factor receptor superfamily	chr17:43224921:43226137:+	1	43225001-43225056
225876	Kdm2a	lysine-specific demethylase 2A	chr19:4316147:4319099:-	5	4318486-4318576,4317944-4318034,4318383-4318455,4318744-4318795,4317033-4317085
14200	Fhl2	four and a half LIM domains protein 2	chr1:43179919:43180358:-	2	43179929-43180049,43180151-43180275
98404	AI597479	ashwin	chr1:43170087:43172791:+	9	43172433-43172488,43171333-43171399,43172054-43172134,43171943-43172020,43170966-43171023,43172587-43172667,43172237-43172289,43171156-43171251,43170449-43170498
73122	Tgfbrap1	transforming growth factor-beta	chr1:43104114:43106503:-	3	43104238-43104300,43104345-43104397,43104407-43104453
230088	B230312A22Rik	hypothetical protein LOC230088	chr4:43045382:43046406:-	2	43045587-43045678,43045689-43045807
56323	Dnajb5	dnaJ homolog subfamily B member 5	chr4:42970423:42971604:+	2	42970601-42970659,42971060-42971115
230085	N28178	hypothetical protein LOC230085	chr4:42952473:42954479:+	1	42952993-42953045
235300	Tmem136	transmembrane protein 136	chr9:42916736:42919402:-	2	42917432-42917486,42917496-42917559
110355	Adrbk1	SubName: Full=Putative uncharacterized protein; Flags: Fragment;	chr19:4286001:4287099:-	2	4286089-4286196,4286939-4286976
15568	Elavl1	ELAV-like protein 1	chr8:4284782:4289599:-	6	4285342-4285378,4288519-4288584,4289477-4289540,4288413-4288475,4285551-4285589,4289379-4289463
69632	Arhgef12	rho guanine nucleotide exchange factor 12	chr9:42771925:42777264:-	14	42772004-42772042,42776777-42776877,42772587-42772681,42775985-42776043,42776598-42776671,42776688-42776763,42772400-42772460,42773934-42773993,42776435-42776530,42775731-42775806,42772684-42772809,42775534-42775623,42772474-42772574,42775810-42775894
56070	Tcerg1	transcription elongation regulator 1	chr18:42734373:42735439:+	1	42734824-42734882
109205	Sobp	sine oculis-binding protein homolog	chr10:42722306:42724220:-	1	42722999-42723055
21856	Timm44	mitochondrial import inner membrane translocase	chr8:4259731:4260135:-	1	4259784-4259841
102209	Snapc2	snRNA-activating protein complex subunit 2	chr8:4255806:4256220:+	1	4256087-4256124
140740	Sec63	translocation protein SEC63 homolog	chr10:42548840:42552320:+	2	42549855-42549900,42551492-42551586
14300	Frg1	protein FRG1	chr8:42482809:42482961:-	2	42482922-42482973,42482854-42482916
26400	Map2k7	dual specificity mitogen-activated protein	chr8:4245829:4247896:+	7	4247582-4247706,4246487-4246554,4246349-4246467,4246172-4246297,4247468-4247528,4247254-4247336,4247118-4247179
17977	Ncoa1	nuclear receptor coactivator 1	chr12:4247363:4249750:-	3	4247394-4247445,4248280-4248342,4248652-4248687
11886	Asah1	acid ceramidase precursor	chr8:42425997:42426949:-	2	42426930-42426989,42426754-42426809
14628	Ostm1	RecName: Full=Osteopetrosis-associated transmembrane protein 1; AltName: Full=Grey-lethal protein; Flags: Precursor;	chr10:42420344:42422261:+	3	42421718-42421764,42421183-42421245,42421819-42421878
18536	pcm-1	Mus musculus pcm-1 mRNA for pericentriolar material-1, complete cds.	chr8:42417362:42419441:+	4	42418977-42419080,42417854-42417925,42418142-42418177,42418239-42418327
11600	Angpt1	angiopoietin-1 precursor	chr15:42256271:42258515:-	4	42256545-42256635,42256353-42256423,42256721-42256771,42257062-42257159
54198	Snx3	sorting nexin-3	chr10:42254564:42255175:+	3	42254883-42255000,42254757-42254879,42254632-42254756
12366	Casp2	caspase-2	chr6:42230476:42232495:+	2	42231305-42231345,42231416-42231482
272589	Tbcel	Mus musculus adult male corpora quadrigemina cDNA, RIKEN full-length enriched library, clone:B230385G11 product:genomic DNA; unknown EST, full insert sequence.	chr9:42220400:42223913:-	8	42223224-42223285,42222592-42222702,42223524-42223587,42220611-42220680,42220541-42220610,42222737-42222772,42222424-42222502,42223762-42223824
84095	Pi4k2a	phosphatidylinositol 4-kinase type 2-alpha	chr19:42194444:42196708:+	1	42196403-42196439
665775	Bod1l	biorientation of chromosomes in cell division	chr5:42178778:42180070:-	1	42179361-42179449
245404	Dcaf12l1	DDB1- and CUL4-associated factor 12-like protein	chrX:42139749:42141470:-	1	42140988-42141024
102103	Mtus1	microtubule-associated tumor suppressor 1	chr8:42076266:42078773:-	14	42077261-42077298,42077079-42077196,42076990-42077078,42078280-42078387,42076270-42076306,42078114-42078164,42078003-42078108,42077304-42077376,42077957-42078001,42076348-42076392,42076822-42076884,42077777-42077890,42077681-42077753,42077377-42077475
100972	Rab28	ras-related protein Rab-28	chr5:42016215:42017008:-	1	42016243-42016297
11988	Slc7a2	low affinity cationic amino acid transporter 2	chr8:42001888:42007424:+	4	42004954-42004992,42002040-42002091,42004811-42004851,42003089-42003142
66583	Exosc1	3'-5' exoribonuclease CSL4 homolog isoform 1	chr19:41997470:41998471:-	1	41997617-41997657
56484	Foxo3	forkhead box protein O3	chr10:41905592:41906101:-	2	41905671-41905786,41905850-41905897
71085	Arhgap19	rho GTPase-activating protein 19 isoform 1	chr19:41841078:41844675:-	1	41842313-41842352
52588	Tspan14	tetraspanin-14	chr14:41719733:41721346:-	1	41720064-41720148
170719	Oxr1	oxidation resistance protein 1 isoform E	chr15:41690839:41692593:+	9	41690924-41690975,41691953-41692066,41691855-41691911,41691066-41691111,41691118-41691219,41692184-41692221,41690981-41691043,41691803-41691849,41691636-41691752
52348	Vps37a	RecName: Full=Vacuolar protein sorting-associated protein 37A; Short=Vps37A; AltName: Full=ESCRT-I complex subunit VPS37A;	chr8:41631630:41636488:+	1	41635952-41636002
213402	Armc2	RecName: Full=Armadillo repeat-containing protein 2;	chr10:41634797:41636867:-	6	41634995-41635057,41635420-41635520,41636179-41636283,41635904-41636022,41634812-41634863,41636078-41636178
140742	Sesn1	sestrin-1 isoform 1	chr10:41627164:41628242:+	1	41627305-41627347
12804	Cntfr	ciliary neurotrophic factor receptor subunit	chr4:41604530:41605182:-	1	41604665-41604716
238130	mKIAA0716	Mus musculus adult male pituitary gland cDNA, RIKEN full-length enriched library, clone:5330406C03 product:hypothetical Src homology 3 (SH3) domain/Repeat in HS1/Cortactin containing protein, full insert sequence.	chr12:41571252:41573075:+	3	41572583-41572622,41571233-41571270,41572463-41572503
71901	2310028H24Rik	hypothetical protein LOC71901 isoform 2	chr4:41465962:41467272:-	2	41466687-41466753,41466174-41466254
269424	Phf17	protein Jade-1	chr3:41417925:41420786:+	5	41420327-41420416,41420237-41420318,41420472-41420557,41420137-41420225,41419077-41419125
18003	Nedd9	enhancer of filamentation 1 isoform 2	chr13:41405285:41407029:-	4	41406715-41406755,41406764-41406807,41406816-41406929,41405452-41405503
107358	Tm9sf3	transmembrane 9 superfamily member 3 precursor	chr19:41285332:41289561:-	8	41286971-41287091,41287471-41287513,41287667-41287742,41285454-41285518,41288410-41288466,41289120-41289180,41287758-41287802,41286181-41286223
53599	Cd164	sialomucin core protein 24	chr10:41248647:41250848:+	6	41250182-41250285,41248841-41248965,41250107-41250170,41249695-41249754,41249316-41249408,41248632-41248701
68970	Dcaf12	DDB1- and CUL4-associated factor 12	chr4:41238333:41240088:-	4	41238863-41238930,41238403-41238489,41239550-41239676,41239865-41239945
68926	Ubap2	ubiquitin-associated protein 2	chr4:41141348:41142183:-	3	41141580-41141685,41141693-41141812,41141991-41142084
67615	Ube2r2	ubiquitin-conjugating enzyme E2 R2	chr4:41137857:41140403:+	2	41138384-41138486,41138127-41138236
17850	Mut	methylmalonyl-CoA mutase, mitochondrial	chr17:41097645:41097848:+	1	41097610-41097693
217378	Dnajc27	dnaJ homolog subfamily C member 27	chr12:4106934:4110602:+	1	4109063-4109106
230082	Nol6	nucleolar protein 6	chr4:41061460:41062389:-	1	41061539-41061610
14538	Gcnt2	N-acetyllactosaminide	chr13:41053711:41056261:+	1	41056186-41056238
67041	Oxct1	succinyl-CoA:3-ketoacid-coenzyme A transferase	chr15:4103769:4105344:+	11	4104508-4104583,4104238-4104362,4104601-4104719,4103749-4103823,4104363-4104465,4105084-4105209,4104959-4105083,4103859-4103966,4104099-4104217,4104833-4104955,4103973-4104098
72672	mKIAA0335	Mus musculus 10, 11 days embryo whole body cDNA, RIKEN full-length enriched library, clone:2810401C22 product:hypothetical Cytochrome c family heme-binding site/Zinc finger, C2H2 type containing protein, full insert sequence.	chr19:40990555:40992437:+	2	40991071-40991111,40990692-40990752
232798	Leng8	RecName: Full=Leukocyte receptor cluster member 8 homolog;	chr7:4097190:4099775:+	3	4098915-4098977,4099332-4099398,4097275-4097343
74164	Nfx1	transcriptional repressor NF-X1	chr4:40971906:40973025:+	2	40972531-40972592,40972369-40972409
76959	Chmp5	charged multivesicular body protein 5	chr4:40911678:40912335:+	1	40911885-40911955
381339	Tmem182	transmembrane protein 182 precursor	chr1:40911861:40912112:+	1	40911845-40911961
380755	Gm889	hypothetical protein LOC380755	chr12:40902973:40903684:-	1	40903063-40903103
226999	Slc9a2	sodium/hydrogen exchanger 2	chr1:40824844:40825730:+	1	40825462-40825497
12495	Entpd1	ectonucleoside triphosphate diphosphohydrolase	chr19:40813519:40816092:+	2	40815317-40815362,40813741-40813786
67465	Sf3a1	splicing factor 3A subunit 1	chr11:4080138:4082544:+	2	4081089-4081151,4080483-4080585
11861	Arl4a	Mus musculus adult male medulla oblongata cDNA, RIKEN full-length enriched library, clone:6330439G07 product:unclassifiable, full insert sequence.	chr12:40759878:40762730:-	1	40761202-40761259
14595	B4galt1	beta-1,4-galactosyltransferase 1	chr4:40751635:40754217:-	13	40751707-40751817,40753606-40753684,40753393-40753486,40752455-40752516,40753302-40753361,40753948-40754011,40753498-40753552,40752333-40752454,40752888-40752994,40751856-40751980,40752556-40752612,40752795-40752854,40752093-40752199
269423	3110057O12Rik	SubName: Full=MCG125095, isoform CRA_b; SubName: Full=Putative uncharacterized protein 3110057O12Rik;	chr3:40739315:40740229:+	1	40739404-40739457
15502	Dnaja1	dnaJ homolog subfamily A member 1	chr4:40679979:40684182:+	1	40680208-40680247
72175	Mfsd8	major facilitator superfamily domain-containing	chr3:40622094:40623435:-	1	40622915-40622963
18415	apg-1b	Mus musculus mRNA for APG-1B, complete cds.	chr3:40593311:40594287:+	4	40594014-40594075,40593389-40593451,40593607-40593684,40593511-40593570
12450	Ccng1	cyclin-G1	chr11:40562054:40564369:-	3	40562546-40562659,40563224-40563343,40564324-40564410
380614	Intu	SubName: Full=Putative uncharacterized protein;	chr3:40505235:40508662:+	5	40505786-40505842,40505725-40505785,40507248-40507330,40505632-40505712,40505234-40505289
108645	Mat2b	methionine adenosyltransferase 2 subunit beta	chr11:40492816:40493525:-	4	40493313-40493390,40492974-40493069,40493193-40493311,40493070-40493192
381760	Ssbp1	single-stranded DNA-binding protein,	chr6:40430895:40431822:+	1	40431323-40431382
16177	Il1r1	interleukin-1 receptor type 1 isoform 1	chr1:40370238:40373022:+	1	40370874-40370930
70503	Ddo	D-aspartate oxidase	chr10:40367847:40369737:+	3	40368976-40369020,40368378-40368437,40368041-40368095
20411	mKIAA1296	Mus musculus ponsin-2 mRNA, complete cds.	chr19:40366530:40369538:-	7	40368556-40368657,40367509-40367597,40368131-40368197,40367770-40367819,40367917-40367962,40367600-40367657,40368385-40368479
54132	Pdlim1	PDZ and LIM domain protein 1	chr19:40296729:40297074:-	2	40297053-40297094,40296908-40296965
106021	Topors	E3 ubiquitin-protein ligase Topors	chr4:40206639:40207213:-	1	40207194-40207244
78334	Cdk19	SubName: Full=Cdc2l6 protein; SubName: Full=Cell division cycle 2-like 6 (CDK8-like), isoform CRA_a;	chr10:40199609:40201951:+	3	40199786-40199849,40200743-40200793,40199614-40199666
230073	Ddx58	probable ATP-dependent RNA helicase DDX58	chr4:40150810:40152842:-	2	40150902-40150949,40151968-40152066
11428	Aco1	cytoplasmic aconitate hydratase	chr4:40144700:40146042:+	1	40144843-40144904
26921	Map4k4	mitogen-activated protein kinase kinase kinase	chr1:40081557:40083155:+	2	40082494-40082549,40082065-40082127
60425	Doc2g	double C2-like domain-containing protein gamma	chr19:4006849:4007005:+	1	4006919-4006970
11702	Amd2	S-adenosylmethionine decarboxylase proenzyme 2	chr10:40007265:40009134:-	1	40007758-40007816
67371	Gtf3c6	general transcription factor 3C polypeptide 6	chr10:39969009:39969338:-	1	39969254-39969325
67900	Mtfp1	mitochondrial fission protein MTP18	chr11:3991484:3992229:-	2	3991993-3992061,3991860-3991970
72472	Slc16a10	monocarboxylate transporter 10 isoform 1	chr10:39753341:39756977:-	4	39755096-39755185,39756312-39756368,39755368-39755409,39754567-39754612
20843	SAP2	Mus musculus mRNA for nuclear protein SA2.	chrX:39628463:39630352:+	5	39630278-39630322,39629503-39629559,39629348-39629404,39630161-39630223,39628591-39628648
668212	Efr3b	protein EFR3 homolog B	chr12:3962554:3966441:-	2	3962761-3962817,3962666-3962724
67702	AK040602	Mus musculus 0 day neonate thymus cDNA, RIKEN full-length enriched library, clone:A430108H20 product:RIKEN cDNA 1600023E10 gene, full insert sequence.	chr1:39608144:39609316:-	1	39608665-39608741
19714	Rev3l	RecName: Full=DNA polymerase zeta catalytic subunit; EC=2.7.7.7; AltName: Full=Protein reversionless 3-like; Short=REV3-like; AltName: Full=Seizure-related protein 4;	chr10:39594030:39595011:+	1	39594935-39594979
14009	Etv1	ETS translocation variant 1 isoform a	chr12:39592356:39594793:+	1	39592409-39592448
14815	Nr3c1	glucocorticoid receptor	chr18:39570199:39574135:-	10	39573548-39573611,39573466-39573516,39573908-39573957,39572849-39572974,39572780-39572840,39573969-39574072,39570834-39570896,39570352-39570395,39573754-39573832,39570924-39570998
109880	Braf	serine/threonine-protein kinase B-raf	chr6:39553237:39560380:-	6	39556662-39556718,39554911-39554964,39557148-39557190,39557070-39557111,39553765-39553807,39556999-39557059
71302	Arhgap26	SubName: Full=Putative uncharacterized protein;	chr18:39530816:39535939:+	7	39533864-39533905,39532222-39532281,39535799-39535898,39531672-39531739,39532490-39532580,39533505-39533546,39532699-39532750
54445	Unc93b1	protein unc-93 homolog B1 isoform b	chr19:3948628:3949339:+	1	3949194-3949254
11798	Xiap	Mus musculus 18-day embryo whole body cDNA, RIKEN full-length enriched library, clone:1110015C02 product:unclassifiable, full insert sequence.	chrX:39458161:39462841:+	9	39459456-39459520,39460550-39460633,39460176-39460225,39459543-39459607,39460910-39460967,39460835-39460894,39458149-39458213,39459337-39459454,39459009-39459060
54484	Mkrn1	E3 ubiquitin-protein ligase makorin-1	chr6:39347820:39349223:-	5	39348347-39348411,39348931-39348976,39347902-39347975,39349052-39349096,39348518-39348555
106064	AW549877	hypothetical protein LOC106064	chr15:3932035:3936195:-	6	3933958-3934014,3932386-3932448,3934057-3934116,3932544-3932620,3932737-3932772,3932299-3932341
72144	Slc37a3	Mus musculus 10 days embryo whole body cDNA, RIKEN full-length enriched library, clone:2610507O21 product:similar to TRANSMEMBRANE PROTEIN QUICKEN [Xenopus laevis], full insert sequence.	chr6:39285984:39287190:-	1	39286459-39286515
14360	Fyn	tyrosine-protein kinase Fyn isoform b	chr10:39283778:39285180:+	3	39284015-39284070,39283831-39283905,39283927-39283971
331401	Thoc2	SubName: Full=Putative uncharacterized protein; SubName: Full=THO complex 2; Flags: Fragment;	chrX:39148171:39150956:-	4	39148784-39148852,39148947-39149035,39149156-39149206,39150503-39150575
13435	Dnmt3a	SubName: Full=Putative uncharacterized protein;	chr12:3907747:3914443:+	9	3913020-3913137,3908047-3908111,3910146-3910209,3913187-3913241,3909391-3909477,3913248-3913316,3913330-3913371,3912709-3912761,3910012-3910060
338523	Jhdm1d	lysine-specific demethylase 7	chr6:39086619:39093209:-	7	39092006-39092054,39092694-39092742,39087005-39087124,39090171-39090250,39090701-39090770,39088142-39088184,39088368-39088420
100515	Zfp518b	zinc finger protein 518B	chr5:39059719:39062650:-	1	39059785-39059828
67857	Ppp6c	serine/threonine-protein phosphatase 6 catalytic	chr2:39052318:39052860:-	3	39052605-39052708,39052439-39052534,39052358-39052428
243771	Parp12	poly [ADP-ribose] polymerase 12	chr6:39036411:39037313:-	3	39036766-39036802,39036663-39036717,39037256-39037308
14164	Fgf1	heparin-binding growth factor 1 precursor	chr18:38998327:39001580:-	7	39001527-39001576,38999390-38999450,39000576-39000620,38998705-38998743,39001453-39001523,38999556-38999617,38999982-39000036
209478	Tbc1d12	TBC1 domain family member 12	chr19:38992429:38994413:+	1	38993259-38993300
72244	1600014C10Rik	hypothetical protein LOC72244	chr7:38979989:38982584:+	7	38980675-38980756,38981229-38981302,38980102-38980162,38981698-38981739,38980791-38980850,38980622-38980673,38981856-38981913
22388	Wdr1	WD repeat-containing protein 1	chr5:38918052:38919044:-	5	38918384-38918444,38918844-38918961,38918083-38918194,38918531-38918611,38918259-38918375
76899	Golga1	Mus musculus adult male brain cDNA, RIKEN full-length enriched library, clone:0710001G09 product:hypothetical protein, full insert sequence.	chr2:38872023:38873928:-	1	38872302-38872392
14368	Fzd6	frizzled-6 precursor	chr15:38868100:38869734:+	1	38868334-38868447
74055	PLC-epsilon	Mus musculus PLC-epsilon mRNA for phosphoinositide-specific phospholipase C PLC-epsilon, complete cds.	chr19:38857027:38859590:+	2	38857870-38857911,38857733-38857774
381338	Lonrf2	LON peptidase N-terminal domain and RING finger	chr1:38851354:38854873:-	2	38854424-38854459,38854304-38854356
56349	Net1	neuroepithelial cell-transforming gene 1 protein	chr13:3881809:3883315:-	2	3882002-3882065,3882533-3882585
24066	Spry4	protein sprouty homolog 4	chr18:38745919:38749459:-	4	38746101-38746215,38747988-38748051,38746908-38746963,38748361-38748416
19777	C80913	Mus musculus NNX3 mRNA, complete cds.	chr7:38745012:38746533:-	3	38745874-38745926,38745733-38745821,38746325-38746377
66309	Tmem128	transmembrane protein 128	chr5:38660298:38660857:+	1	38660457-38660512
12660	Chka	choline kinase alpha isoform 2	chr19:3864798:3867549:+	1	3865651-3865697
71063	Zfp597	zinc finger protein 597	chr16:3861544:3865630:-	4	3862261-3862313,3864897-3864955,3861579-3861641,3865426-3865469
66335	Atp6v1c1	V-type proton ATPase subunit C 1	chr15:38621462:38622199:+	2	38621410-38621477,38621725-38621795
12549	Arhgap31	rho GTPase-activating protein 31	chr16:38598456:38601537:-	3	38601412-38601471,38600448-38600540,38599985-38600075
105245	Txndc5	thioredoxin domain-containing protein 5	chr13:38592144:38593454:-	4	38593450-38593508,38593309-38593375,38592412-38592498,38593092-38593131
12161	Bmp6	bone morphogenetic protein 6 precursor	chr13:38590937:38591597:+	1	38591481-38591523
14536	Nr6a1	nuclear receptor subfamily 6 group A member 1	chr2:38578895:38583346:-	1	38581921-38581965
385674	Zfp174	zinc finger protein 174	chr16:3854812:3858880:+	1	3857634-3857669
67776	Vwa5a	von Willebrand factor A domain-containing	chr9:38549358:38550922:+	2	38549312-38549361,38550188-38550255
224143	Poglut1	KTEL motif-containing protein 1 precursor	chr16:38525264:38526708:-	1	38525631-38525691
26384	Gnpda1	glucosamine-6-phosphate isomerase 1	chr18:38487191:38488526:-	2	38487395-38487457,38487745-38487791
56736	Triad2	Mus musculus TRIAD2 type I (Triad2) mRNA, complete cds.	chr18:38476266:38477501:+	7	38477038-38477078,38476570-38476648,38476909-38477034,38476655-38476772,38477245-38477306,38476774-38476812,38477165-38477227
320538	Ubn2	ubinuclein-2	chr6:38452287:38462763:+	12	38460660-38460728,38459416-38459461,38456490-38456589,38456419-38456478,38459692-38459752,38459992-38460059,38453140-38453211,38461850-38461901,38456620-38456676,38459543-38459605,38454693-38454750,38456309-38456371
11544	Adprh	[Protein ADP-ribosylarginine] hydrolase	chr16:38445479:38445769:-	1	38445574-38445675
54375	Azin1	antizyme inhibitor 1	chr15:38417185:38420115:-	8	38419451-38419526,38418778-38418871,38419633-38419703,38419063-38419108,38418895-38418963,38419527-38419630,38419710-38419772,38419218-38419278
64082	Popdc2	popeye domain-containing protein 2 isoform 2	chr16:38377741:38378300:+	2	38377811-38377867,38377912-38377956
75599	Pcdh1	SubName: Full=Protocadherin 1 isoform 2; Flags: Fragment;	chr18:38356348:38356902:-	1	38356413-38356453
56637	Gsk3b	glycogen synthase kinase-3 beta	chr16:38240655:38246165:+	13	38242992-38243088,38243552-38243645,38243427-38243483,38245157-38245199,38243233-38243294,38245399-38245508,38242533-38242635,38243764-38243852,38243114-38243227,38244580-38244632,38241678-38241730,38244949-38245005,38243646-38243745
209032	Zc3hav1l	zinc finger CCCH-type antiviral protein 1-like	chr6:38241872:38243021:-	2	38241938-38241997,38242309-38242395
225888	Suv420h1	histone-lysine N-methyltransferase SUV420H1	chr19:3815589:3816391:+	3	3816005-3816064,3815624-3815675,3815742-3815789
226982	Eif5b	eukaryotic translation initiation factor 5B	chr1:38108558:38112424:+	2	38109461-38109520,38109007-38109044
15183	Hdac3	histone deacetylase 3	chr18:38096625:38097267:-	1	38096987-38097024
107513	Ssr1	translocon-associated protein subunit alpha	chr13:38063270:38071607:-	10	38071004-38071082,38071312-38071378,38071090-38071152,38065150-38065227,38070739-38070831,38070839-38070935,38069734-38069794,38071160-38071215,38071563-38071611,38071461-38071562
98258	Txndc9	thioredoxin domain-containing protein 9	chr1:38040712:38044506:-	2	38044269-38044308,38044332-38044387
13367	BC029331	Mus musculus diaphanous homolog 1 (Drosophila), mRNA (cDNA clone IMAGE:3672541), with apparent retained intron.	chr18:38004479:38004994:-	1	38004586-38004655
93711	Pcdhga3	protocadherin gamma-A3	chr18:37999783:38001526:+	3	38000647-38000684,38001214-38001292,38000481-38000536
93712	Pcdhga4	protocadherin gamma-A4	chr18:37999783:38001524:+	3	38000647-38000684,38001214-38001292,38000481-38000536
93717	Pcdhga9	protocadherin gamma subfamily A, 9	chr18:37999783:38001517:+	3	38000647-38000684,38001214-38001292,38000481-38000536
75219	Dusp18	dual specificity protein phosphatase 18	chr11:3797581:3801299:+	6	3799216-3799276,3800507-3800562,3798574-3798639,3798758-3798823,3798682-3798753,3800927-3801053
66092	Ghitm	growth hormone-inducible transmembrane protein	chr14:37934004:37935327:-	8	37934115-37934175,37934421-37934500,37934240-37934359,37935141-37935264,37934366-37934420,37934642-37934759,37934910-37935026,37935266-37935352
70790	mKIAA0896	Mus musculus 14 days embryo liver cDNA, RIKEN full-length enriched library, clone:4432411E13 product:hypothetical HECT domain (Ubiquitin-protein ligase) containing protein, full insert sequence.	chr15:37897083:37898047:-	2	37898024-37898087,37897945-37898002
320184	Lrrc58	leucine-rich repeat-containing protein 58	chr16:37881548:37888943:+	10	37885610-37885734,37887149-37887210,37882101-37882147,37886991-37887067,37885198-37885257,37882160-37882222,37884969-37885008,37887872-37887927,37884546-37884600,37883815-37883862
382985	Rrm2b	ribonucleoside-diphosphate reductase subunit M2	chr15:37853708:37856999:-	4	37856507-37856549,37854506-37854542,37856601-37856648,37855060-37855117
72972	Gcap14	granule cell antiserum positive 14 isoform 2	chr14:37688122:37692853:-	20	37691939-37692038,37689959-37690003,37690551-37690642,37688334-37688396,37692737-37692772,37691788-37691883,37690006-37690063,37692043-37692154,37692589-37692639,37688883-37688968,37689135-37689194,37688970-37689032,37691641-37691758,37691486-37691596,37690130-37690198,37688145-37688213,37688581-37688692,37688695-37688754,37691373-37691485,37688449-37688571
93888	Pcdhb17	protocadherin beta 17	chr18:37647212:37647944:+	1	37647427-37647474
50768	Dlc1	rho GTPase-activating protein 7 isoform 2	chr8:37630799:37633336:-	6	37632181-37632222,37632096-37632148,37631607-37631722,37631856-37631914,37632984-37633085,37632871-37632932
74197	Gtf2e1	general transcription factor IIE subunit 1	chr16:37509882:37511474:-	3	37510938-37510989,37510354-37510396,37509915-37509952
74120	Zfp263	zinc finger protein 263	chr16:3749865:3750788:+	1	3750323-3750365
269181	Mgat4a	alpha-1,3-mannosyl-glycoprotein	chr1:37496185:37501503:-	6	37498858-37498913,37498720-37498757,37497343-37497398,37496204-37496262,37500097-37500142,37500636-37500696
76178	6330578E17Rik	hypothetical protein LOC76178	chr1:37473931:37477430:-	14	37476204-37476295,37474744-37474824,37474000-37474080,37475530-37475647,37474449-37474574,37475364-37475423,37476299-37476404,37474321-37474442,37476121-37476198,37476494-37476567,37474614-37474736,37474125-37474195,37475978-37476081,37474826-37474935
269180	AK051424	Mus musculus 12 days embryo spinal ganglion cDNA, RIKEN full-length enriched library, clone:D130048C09 product:unclassifiable, full insert sequence.	chr1:37465104:37467578:+	10	37466976-37467015,37466816-37466867,37465808-37465886,37466910-37466960,37465724-37465775,37465221-37465279,37465122-37465159,37466151-37466231,37465301-37465361,37465893-37465949
22393	Wfs1	wolframin	chr5:37357343:37358111:-	5	37357859-37357941,37358070-37358185,37357647-37357755,37357945-37358068,37357449-37357507
[truncated: 2,172 more rows]

## Sheet: CELF1 muscle
#Gene	Symbol	Description	UTRexon	NumClusters	Coords
59025	Usp14	ubiquitin carboxyl-terminal hydrolase 14 isoform	chr18:9993613:9996094:-	8	9995739-9995847,9994719-9994776,9995463-9995568,9995994-9996093,9994146-9994181,9994643-9994692,9995671-9995737,9993740-9993793
269470	Wdr3	WD repeat-containing protein 3	chr3:99942105:99942609:-	1	99942255-99942303
24000	Ptpn21	SubName: Full=PTP-RL10b;	chr12:99914951:99916759:-	3	99915907-99916006,99916325-99916370,99915279-99915339
68904	Abhd13	abhydrolase domain-containing protein 13	chr8:9988418:9992154:+	3	9989052-9989097,9989406-9989457,9989473-9989533
207214	Larp4	la-related protein 4 isoform 2	chr15:99842605:99846789:+	9	99845512-99845564,99846543-99846659,99844230-99844277,99845883-99845953,99843802-99843841,99845973-99846040,99843475-99843523,99843088-99843153,99845138-99845244
18484	Pam	peptidyl-glycine alpha-amidating monooxygenase	chr1:99717671:99718386:-	2	99718195-99718274,99717734-99717771
18679	Phka1	phosphorylase b kinase regulatory subunit alpha,	chrX:99709314:99711380:-	12	99710146-99710247,99710779-99710901,99710575-99710631,99711263-99711357,99709567-99709660,99710084-99710144,99709457-99709565,99710903-99711016,99709964-99710071,99711028-99711138,99710661-99710775,99709879-99709959
72157	Pgm2	phosphoglucomutase-1	chr4:99659369:99659899:+	3	99659712-99659819,99659451-99659487,99659495-99659605
238799	Tnpo1	transportin-1 isoform 2	chr13:99612036:99614575:-	6	99613727-99613767,99612959-99613076,99613455-99613566,99613185-99613246,99613349-99613400,99612444-99612566
71949	Lass5	LAG1 longevity assurance homolog 5	chr15:99566023:99566651:-	1	99566481-99566542
17311	Kitl	kit ligand precursor	chr10:99558652:99563045:+	1	99560979-99561014
66379	2310016M24Rik	hypothetical protein LOC66379	chr15:99558257:99558567:+	1	99558346-99558424
14555	Gpd1	glycerol-3-phosphate dehydrogenase [NAD+],	chr15:99553718:99555438:+	3	99554351-99554429,99554502-99554568,99555077-99555130
52392	D1Ertd622e	hypothetical protein LOC52392	chr1:99540479:99542291:-	2	99540952-99541000,99540644-99540698
218503	Fcho2	FCH domain only protein 2	chr13:99493362:99495708:-	4	99493804-99493846,99495018-99495059,99495291-99495352,99493724-99493801
16319	Incenp	inner centromere protein	chr19:9946787:9947166:-	1	9947054-9947092
14420	Galc	galactocerebrosidase precursor	chr12:99440510:99442150:-	1	99441118-99441174
76789	2410129H14Rik	Mus musculus ES cells cDNA, RIKEN full-length enriched library, clone:2410129H14 product:unclassifiable, full insert sequence.	chr14:99433769:99435708:-	4	99435247-99435313,99434785-99434827,99433852-99433935,99435314-99435382
320438	Alg6	dolichyl pyrophosphate Man9GlcNAc2	chr4:99428759:99430151:+	2	99429106-99429145,99428895-99428961
74125	Armc8	armadillo repeat-containing protein 8 isoform 1	chr9:99380514:99381162:-	4	99380679-99380721,99380767-99380811,99380541-99380587,99380894-99380980
110213	Tmbim6	bax inhibitor 1	chr15:99238929:99240471:+	3	99239584-99239631,99239481-99239579,99239096-99239175
21384	Tbx15	T-box transcription factor TBX15	chr3:99156546:99158183:+	4	99157959-99158044,99156777-99156834,99157100-99157142,99156583-99156706
68558	Ankra2	ankyrin repeat family A protein 2	chr13:99043388:99043868:+	1	99043624-99043672
105372	Utp15	U3 small nucleolar RNA-associated protein 15	chr13:99016800:99019083:-	2	99018311-99018347,99018454-99018527
170755	Sgk3	serine/threonine-protein kinase Sgk3	chr1:9888971:9892649:+	1	9889747-9889786
108155	Ogt	SubName: Full=Ogt protein; SubName: Full=Putative uncharacterized protein;	chrX:98877669:98879688:+	6	98878731-98878820,98878214-98878304,98878870-98878950,98877952-98878009,98878102-98878167,98877704-98877798
270627	Taf1	transcription initiation factor TFIID subunit 1	chrX:98794864:98797128:+	1	98795513-98795556
67603	Dusp6	dual specificity protein phosphatase 6	chr10:98728933:98730122:+	1	98729940-98729981
192160	Casc3	protein CASC3	chr11:98693575:98695121:+	2	98694524-98694559,98693817-98693899
74026	Msl1	male-specific lethal 1 homolog	chr11:98666746:98669173:+	7	98668418-98668507,98666772-98666869,98667699-98667745,98667641-98667686,98668244-98668297,98668199-98668239,98666879-98666917
217166	Nr1d1	nuclear receptor subfamily 1 group D member 1	chr11:98629249:98629533:-	1	98629248-98629324
56364	Zmym3	zinc finger MYM-type protein 3 isoform 1	chrX:98599724:98600949:-	2	98600174-98600209,98599762-98599849
11842	Arf3	ADP-ribosylation factor 3	chr15:98568057:98570763:-	6	98570224-98570276,98570281-98570333,98570147-98570210,98568631-98568685,98568709-98568763,98568766-98568836
67972	Atp2b1	plasma membrane calcium ATPase 1	chr10:98485753:98488775:+	6	98486870-98486909,98486193-98486248,98487360-98487411,98487948-98488032,98488361-98488405,98486395-98486446
11512	Adcy6	SubName: Full=MKIAA0422 protein; Flags: Fragment;	chr15:98420421:98422780:-	2	98421485-98421536,98421663-98421764
55988	Snx12	sorting nexin-12 isoform 2	chrX:98407300:98409100:-	4	98408307-98408362,98407442-98407540,98407909-98407974,98407347-98407397
14719	Got2	aspartate aminotransferase, mitochondrial	chr8:98388037:98389028:-	2	98388557-98388649,98388398-98388453
209361	Taf3	RecName: Full=Transcription initiation factor TFIID subunit 3; AltName: Full=140 kDa TATA box-binding protein-associated factor; AltName: Full=TBP-associated factor 3; AltName: Full=Transcription initiation factor TFIID 140 kDa subunit; Short=TAF(II)140; Short=TAF140; Short=TAFII-140; Short=TAFII140;	chr2:9837223:9837975:-	1	9837307-9837365
234595	Slc38a7	putative sodium-coupled neutral amino acid	chr8:98359823:98361468:-	1	98359870-98359915
21393	Tcap	telethonin	chr11:98245859:98246267:+	2	98245772-98245862,98245868-98245919
13134	Dach1	dachshund homolog 1 isoform 1	chr14:98186066:98188800:-	1	98187632-98187687
239652	Zfp641	zinc finger protein 641	chr15:98116553:98118902:-	5	98117618-98117696,98118008-98118048,98117915-98117965,98117758-98117809,98117851-98117906
69131	Cdk12	cell division protein kinase 12 isoform 3	chr11:98111703:98114854:+	1	98112467-98112509
207781	C2cd2	C2 calcium-dependent domain containing 2	chr16:98076817:98080962:-	9	98080777-98080822,98079435-98079503,98079800-98079878,98080214-98080289,98077935-98078003,98076886-98076983,98080308-98080378,98077101-98077146,98079746-98079796
94043	Bbp	Mus musculus beta-amyloid binding protein (Bbp) mRNA, complete cds.	chr4:98022061:98022371:-	1	98022059-98022122
13803	Enc1	ectoderm-neural cortex protein 1	chr13:98020492:98022989:+	1	98021162-98021213
17342	Mitf	SubName: Full=Microphthalmia-associated transcription factor B isoform; Flags: Fragment;	chr6:97968169:97971352:+	3	97969680-97969732,97969617-97969676,97968485-97968543
78541	Asb8	ankyrin repeat and SOCS box protein 8	chr15:97965071:97966236:-	5	97965088-97965163,97965198-97965308,97965355-97965474,97965968-97966037,97965557-97965621
18642	Pfkm	6-phosphofructokinase, muscle type	chr15:97962490:97962879:+	4	97962456-97962557,97962694-97962750,97962558-97962619,97962754-97962874
72194	Fbxl20	F-box/LRR-repeat protein 20	chr11:97943868:97950904:-	6	97950072-97950148,97943868-97943907,97946494-97946588,97950166-97950217,97950224-97950266,97946607-97946666
223870	Senp1	sentrin-specific protease 1	chr15:97871660:97873320:-	2	97872114-97872157,97871713-97871773
12295	Cacnb1	voltage-dependent L-type calcium channel subunit	chr11:97866240:97866334:-	1	97866182-97866244
18027	Nfia	nuclear factor 1 A-type isoform 1	chr4:97777926:97785567:+	17	97779921-97779957,97779961-97780039,97780912-97780970,97782720-97782834,97780061-97780126,97780795-97780888,97782564-97782674,97779638-97779723,97785253-97785365,97780139-97780206,97784085-97784120,97784763-97784823,97780414-97780502,97778994-97779072,97784333-97784389,97781205-97781261,97779469-97779525
20333	Sec22b	vesicle-trafficking protein SEC22b	chr3:97725193:97726241:+	7	97725871-97725975,97726128-97726163,97725226-97725264,97725654-97725759,97725594-97725648,97725380-97725458,97725153-97725201
18518	Igbp1	immunoglobulin-binding protein 1	chrX:97711044:97711464:+	1	97711158-97711199
16796	Lasp1	LIM and SH3 domain protein 1	chr11:97697559:97700078:+	1	97699821-97699874
56233	HDAC7	Mus musculus histone deacetylase 7 (HDAC7) mRNA, complete cds.	chr15:97623112:97624127:-	1	97623139-97623239
67480	Cwc25	pre-mRNA-splicing factor CWC25 homolog	chr11:97606929:97608668:-	1	97607770-97607820
233490	Crebzf	CREB/ATF bZIP transcription factor	chr7:97592601:97596229:+	3	97592977-97593017,97593123-97593176,97593777-97593837
108083	Pip4k2b	phosphatidylinositol-5-phosphate 4-kinase type-2	chr11:97576471:97580172:-	5	97577989-97578094,97578095-97578199,97576494-97576599,97578246-97578296,97578363-97578420
246198	Mllt6	myeloid/lymphoid or mixed lineage-leukemia	chr11:97542901:97546772:+	4	97543565-97543679,97546007-97546070,97545826-97545873,97544282-97544382
83679	Pde4dip	myomegalin isoform 4	chr3:97542767:97545193:-	1	97542819-97542866
20452	St8sia4	CMP-N-acetylneuraminate-poly-alpha-2,	chr1:97484261:97488258:-	1	97484487-97484525
108097	Prkab2	5'-AMP-activated protein kinase subunit beta-2	chr3:97473728:97476990:+	8	97474068-97474152,97474592-97474653,97476658-97476779,97474478-97474544,97475505-97475585,97476576-97476657,97475625-97475690,97474181-97474295
14263	Fmo5	dimethylaniline monooxygenase [N-oxide-forming]	chr3:97455750:97459210:+	2	97456034-97456074,97457245-97457288
68018	Col4a3bp	collagen type IV alpha-3-binding protein isoform	chr13:97407073:97410121:+	5	97408276-97408374,97408128-97408249,97407607-97407670,97407500-97407599,97407741-97407832
56013	Srcin1	SRC kinase signaling inhibitor 1	chr11:97370654:97373827:-	1	97371186-97371229
233489	mKIAA4114	Mus musculus mammary gland RCB-0526 Jyg-MC(A) cDNA, RIKEN full-length enriched library, clone:G830015A09 product:phosphatidylinositol binding clathrin assembly protein, full insert sequence.	chr7:97356107:97357442:+	4	97356401-97356443,97356089-97356132,97357311-97357423,97356938-97357006
109006	Ciapin1	anamorsin	chr8:97343719:97346996:-	2	97346763-97346802,97346450-97346539
192157	Socs7	suppressor of cytokine signaling 7	chr11:97254703:97259856:+	10	97255924-97255997,97256167-97256226,97257530-97257574,97257411-97257487,97257036-97257083,97258813-97258877,97259786-97259822,97259699-97259754,97258695-97258795,97256067-97256110
67698	Fam174a	membrane protein FAM174A precursor	chr1:97230516:97231861:+	4	97230954-97231036,97231046-97231085,97230819-97230915,97230683-97230756
107566	Arl2bp	ADP-ribosylation factor-like protein 2-binding	chr8:97197018:97198322:+	5	97197366-97197418,97197311-97197358,97197757-97197816,97197596-97197645,97197831-97197942
320502	Lmod3	leiomodin-3	chr6:97188522:97188838:-	1	97188578-97188629
65106	Arl6ip5	PRA1 family protein 3	chr6:97182566:97183309:+	5	97182915-97183040,97182845-97182882,97183255-97183299,97182732-97182829,97183041-97183149
22200	Uba3	NEDD8-activating enzyme E1 catalytic subunit	chr6:97133810:97134773:-	4	97134191-97134236,97134348-97134389,97134400-97134490,97134116-97134168
70675	AK031819	Mus musculus 13 days embryo male testis cDNA, RIKEN full-length enriched library, clone:6030423O15 product:unclassifiable, full insert sequence.	chr1:9713278:9714562:-	6	9713333-9713386,9713596-9713646,9713799-9713849,9713659-9713767,9713432-9713520,9713869-9713905
13626	Eed	polycomb protein EED	chr7:97103164:97103446:-	2	97103201-97103258,97103271-97103325
102122	Fam192a	NEFA-interacting nuclear protein NIP30	chr8:97098841:97099536:-	1	97099098-97099177
234577	Cpne2	Mus musculus 15 days embryo head cDNA, RIKEN full-length enriched library, clone:D930009E14 product:weakly similar to COPINE III [Homo sapiens], full insert sequence.	chr8:97093978:97094429:+	1	97094124-97094172
19155	Npepps	puromycin-sensitive aminopeptidase	chr11:97067171:97068429:-	2	97067349-97067388,97067798-97067886
16211	Kpnb1	importin subunit beta-1	chr11:97021024:97023994:-	4	97021874-97021918,97021794-97021845,97021617-97021677,97021348-97021383
192287	AK035037	Mus musculus 12 days embryo embryonic body between diaphragm region and neck cDNA, RIKEN full-length enriched library, clone:9430077E01 product:inferred: Mus musculus, Similar to hypothetical protein FLJ10618, clone IMAGE:3594297, mRNA, partial cds, full insert sequence.	chr9:96977430:96979464:-	1	96977548-96977589
64209	Herpud1	homocysteine-responsive endoplasmic	chr8:96918655:96919258:+	2	96918932-96919023,96918826-96918930
107732	Mrpl10	39S ribosomal protein L10, mitochondrial	chr11:96909649:96910527:+	2	96909678-96909723,96909725-96909764
14613	Gja5	gap junction alpha-5 protein	chr3:96855628:96857557:+	1	96855992-96856036
66505	Zmynd11	zinc finger MYND domain-containing protein 11	chr13:9684082:9686107:-	5	9684270-9684344,9685942-9685978,9684353-9684447,9684083-9684121,9684140-9684230
69354	Slc38a4	sodium-coupled neutral amino acid transporter 4	chr15:96825254:96827420:-	4	96826207-96826252,96825556-96825606,96825783-96825885,96827215-96827274
103711	Pnpo	pyridoxine-5'-phosphate oxidase	chr11:96799130:96800228:-	3	96799392-96799433,96799486-96799543,96799213-96799250
17750	Mt2	metallothionein-2	chr8:96697327:96697467:+	1	96697351-96697394
94061	Mrpl1	39S ribosomal protein L1, mitochondrial isoform	chr5:96693356:96695728:+	3	96694098-96694178,96694444-96694486,96694591-96694633
18023	Nfe2l1	nuclear factor erythroid 2-related factor 1	chr11:96678728:96680489:-	3	96678993-96679105,96679224-96679346,96678773-96678850
208440	Dip2c	disco-interacting protein 2 homolog C	chr13:9665276:9668171:+	4	9665837-9665886,9666511-9666573,9665692-9665740,9665607-9665644
76453	Prss23	serine protease 23 precursor	chr7:96656295:96658220:-	5	96658090-96658161,96657917-96657987,96657830-96657900,96657154-96657207,96657781-96657827
67845	Rnf115	E3 ubiquitin-protein ligase RNF115	chr3:96593929:96595078:+	5	96594044-96594110,96594134-96594241,96594638-96594726,96594835-96594944,96594242-96594296
270086	mKIAA1612	Mus musculus adult male testis cDNA, RIKEN full-length enriched library, clone:4930415J21 product:similar to OVARC1001341 PROTEIN [Homo sapiens], full insert sequence.	chr8:96588240:96591822:+	4	96589210-96589273,96588501-96588547,96589434-96589475,96591112-96591157
14366	Fzd4	frizzled-4 precursor	chr7:96556870:96558620:+	1	96557839-96557894
67760	Slc38a2	sodium-coupled neutral amino acid transporter 2	chr15:96517823:96520557:-	7	96518884-96518948,96517904-96517969,96518979-96519054,96519071-96519109,96518256-96518328,96519698-96519743,96517845-96517894
231464	Cnot6l	CCR4-NOT transcription complex subunit 6-like	chr5:96504757:96506198:-	3	96505556-96505595,96504972-96505030,96506011-96506067
23802	Amfr	E3 ubiquitin-protein ligase AMFR	chr8:96495488:96497066:-	7	96496961-96497024,96496803-96496867,96495644-96495699,96495711-96495803,96496868-96496933,96495950-96496007,96495853-96495933
50795	Sh3bgr	SH3 domain-binding glutamic acid-rich protein	chr16:96450130:96450540:+	1	96450268-96450393
60365	Rbm8a	RNA-binding protein 8A isoform a	chr3:96435657:96437714:+	2	96435860-96435913,96435946-96435994
69870	Polr3gl	DNA-directed RNA polymerase III subunit	chr3:96381797:96382424:-	3	96381800-96381868,96382047-96382112,96382229-96382342
71446	Wrb	tryptophan-rich protein	chr16:96377559:96379459:+	5	96377860-96377901,96377632-96377725,96379358-96379401,96379293-96379343,96378383-96378438
14062	F2r	proteinase-activated receptor 1 precursor	chr13:96371744:96373687:-	1	96371821-96371867
19823	Rnf7	RING-box protein 2	chr9:96371376:96372152:-	3	96371605-96371682,96371415-96371456,96371857-96371959
56338	Txnip	thioredoxin-interacting protein isoform 1	chr3:96364452:96365780:+	4	96365528-96365652,96364701-96364790,96365074-96365199,96364854-96364934
93871	Brwd1	bromodomain and WD repeat-containing protein 1	chr16:96288275:96290069:-	3	96289457-96289512,96289119-96289168,96288384-96288444
72759	Tmem135	transmembrane protein 135	chr7:96288231:96290347:-	2	96288975-96289022,96289866-96289908
236920	Stard8	stAR-related lipid transfer protein 8	chrX:96268539:96270067:+	1	96269749-96269785
72193	Scaf11	splicing factor, arginine/serine-rich 2,	chr15:96242129:96245218:-	7	96243886-96243974,96243550-96243585,96244559-96244653,96243180-96243231,96244825-96244872,96243421-96243479,96243599-96243663
77044	Arid2	AT rich interactive domain 2 (ARID, RFX-like)	chr15:96232525:96235894:+	5	96233947-96234017,96233520-96233555,96233564-96233657,96235168-96235221,96233390-96233467
11933	Atp1b3	sodium/potassium-transporting ATPase subunit	chr9:96233095:96233942:-	7	96233591-96233692,96233702-96233793,96233490-96233547,96233191-96233245,96233827-96233933,96233406-96233476,96233111-96233176
211586	Tfdp2	SubName: Full=Putative uncharacterized protein; Flags: Fragment;	chr9:96218390:96224065:+	6	96223466-96223528,96218889-96218946,96219712-96219749,96219629-96219668,96218415-96218529,96219209-96219289
15412	Hoxb4	homeobox protein Hox-B4	chr11:96181642:96182944:+	1	96182784-96182821
77929	Yipf6	protein YIPF6	chrX:96140327:96144359:+	6	96141415-96141471,96140623-96140678,96142237-96142303,96142975-96143023,96142901-96142946,96143047-96143085
72114	Zbed3	zinc finger BED domain-containing protein 3	chr13:96106711:96107796:+	1	96107036-96107074
319190	Hist2h2be	histone H2B type 2-E	chr3:96025469:96027661:+	1	96026667-96026711
229603	Otud7b	zinc finger, A20 domain containing 1	chr3:95959891:95965052:+	3	95961828-95961875,95962665-95962714,95961598-95961650
23872	Ets2	protein C-ets-2	chr16:95940745:95942654:+	3	95941118-95941172,95942448-95942501,95941380-95941427
268470	Ube2z	ubiquitin-conjugating enzyme E2 Z	chr11:95908750:95911557:-	2	95911098-95911156,95910598-95910675
105722	Ano6	anoctamin-6	chr15:95803132:95805182:+	1	95803576-95803631
218460	Wdr41	WD repeat-containing protein 41	chr13:95791780:95793269:+	1	95791857-95791946
66471	Anp32e	acidic leucine-rich nuclear phosphoprotein 32	chr3:95749173:95751308:+	8	95749193-95749307,95750586-95750626,95750372-95750458,95749838-95749898,95750476-95750583,95750190-95750255,95749308-95749369,95750664-95750721
77963	Hook1	SubName: Full=Hook homolog 1 (Drosophila); SubName: Full=Putative uncharacterized protein;	chr4:95689028:95690965:+	5	95689861-95689942,95689713-95689782,95689981-95690018,95689579-95689682,95690036-95690089
268469	Zfp652	zinc finger protein 652	chr11:95625373:95626027:+	2	95625886-95625992,95625820-95625868
75137	Rprd2	regulation of nuclear pre-mRNA domain-containing	chr3:95563796:95567602:-	1	95567323-95567372
11835	Ar	androgen receptor	chrX:95512219:95512486:+	1	95512243-95512343
216238	Eea1	Mus musculus adult male aorta and vein cDNA, RIKEN full-length enriched library, clone:A530029P08 product:similar to ENDOSOMAL PROTEIN [Homo sapiens], full insert sequence.	chr10:95504838:95508152:+	12	95505560-95505604,95507311-95507348,95506725-95506762,95505256-95505341,95505349-95505412,95505434-95505472,95507665-95507709,95507739-95507784,95507597-95507656,95506949-95506996,95507850-95507890,95505742-95505816
229595	Adamtsl4	ADAMTS-like protein 4 precursor	chr3:95480127:95480755:-	1	95480404-95480450
17210	Mcl1	induced myeloid leukemia cell differentiation	chr3:95464746:95467101:+	4	95466863-95466915,95466450-95466569,95465821-95465936,95465564-95465673
75552	Paqr9	progestin and adipoQ receptor family member 9	chr9:95461505:95462540:+	1	95461917-95461976
56205	Ensa	alpha-endosulfine isoform b	chr3:95432633:95434415:+	4	95432964-95433085,95433738-95433799,95434405-95434473,95434215-95434319
18000	Sept2	septin-2 a	chr1:95404290:95406307:+	2	95404753-95404816,95404919-95404963
59014	Rrs1	ribosome biogenesis regulatory protein homolog	chr1:9536702:9537535:+	2	9537194-9537254,9537441-9537493
67958	2610101N10Rik	Mus musculus adult male testis cDNA, RIKEN full-length enriched library, clone:4931431N04 product:hypothetical Serine-rich region/RNA-binding region RNP-1 (RNA recognition motif)/Glutamic acid-rich region/SWAP / SURP containing protein, full insert sequence.	chr9:95357313:95361823:-	13	95358282-95358321,95358171-95358236,95360531-95360587,95360611-95360670,95358456-95358501,95360916-95360978,95361619-95361712,95357618-95357673,95359935-95359998,95361558-95361618,95359218-95359273,95357863-95357982,95361108-95361178
20747	Spop	speckle-type POZ protein	chr11:95353155:95354724:+	6	95354131-95354197,95354559-95354639,95354305-95354375,95354380-95354457,95353559-95353639,95354670-95354715
110611	Hdlbp	vigilin	chr1:95302517:95304749:-	2	95303846-95303901,95302616-95302675
11863	Arnt	aryl hydrocarbon receptor nuclear translocator	chr3:95299315:95301161:+	3	95299397-95299433,95299938-95299991,95300691-95300737
69821	Mterfd2	mTERF domain-containing protein 2	chr1:95195788:95198036:-	1	95196949-95196984
217127	Myst2	histone acetyltransferase MYST2 isoform 1	chr11:95135573:95137099:-	5	95135753-95135843,95136311-95136371,95136720-95136802,95136806-95136876,95135848-95135926
243574	Kbtbd8	kelch repeat and BTB domain-containing protein 8	chr6:95076934:95079781:+	3	95078676-95078732,95078841-95078887,95078758-95078800
229589	Prune	protein prune homolog	chr3:95057596:95058917:-	2	95057935-95058042,95057839-95057932
56772	Mllt11	protein AF1q	chr3:95022466:95024106:-	2	95023116-95023239,95023248-95023303
71207	Nudt4	diphosphoinositol polyphosphate phosphohydrolase	chr10:95009641:95011921:-	11	95010718-95010839,95009927-95010049,95010183-95010278,95011340-95011457,95011227-95011334,95011498-95011540,95010525-95010613,95009655-95009764,95009830-95009901,95010389-95010460,95010279-95010383
93765	Ube2n	ubiquitin-conjugating enzyme E2 N	chr10:95004946:95008292:+	5	95006165-95006215,95007290-95007357,95005779-95005827,95005609-95005711,95006285-95006347
107767	Scamp1	secretory carrier-associated membrane protein 1	chr13:94971388:94973953:-	6	94973258-94973319,94972213-94972257,94971436-94971543,94973439-94973489,94972963-94973070,94971942-94971982
217779	Lysmd1	lysM and putative peptidoglycan-binding	chr3:94942456:94943441:+	1	94943198-94943247
320709	Tmem117	Mus musculus adult male diencephalon cDNA, RIKEN full-length enriched library, clone:9330142K14 product:weakly similar to KIAA1657 PROTEIN (FRAGMENT) [Homo sapiens], full insert sequence.	chr15:94925436:94926528:+	2	94925488-94925536,94925568-94925658
13548	Dyrk1a	dual specificity	chr16:94913808:94917126:+	12	94915772-94915889,94913770-94913863,94915948-94916056,94914275-94914322,94914896-94914993,94916263-94916299,94916174-94916262,94914212-94914248,94914998-94915048,94915069-94915166,94916346-94916462,94914054-94914126
18604	Pdk2	pyruvate dehydrogenase kinase, isoenzyme 2	chr11:94887573:94888495:-	6	94888141-94888231,94887894-94887961,94888040-94888112,94888277-94888393,94887770-94887892,94887632-94887751
78808	Stxbp5	RecName: Full=Syntaxin-binding protein 5; AltName: Full=Lethal(2) giant larvae protein homolog 3; AltName: Full=Tomosyn-1;	chr10:9475345:9480710:-	3	9478177-9478216,9477567-9477657,9479889-9479925
14733	Gpc1	glypican-1 precursor	chr1:94755141:94756773:+	1	94756496-94756560
16476	Jun	transcription factor AP-1	chr4:94715727:94716957:-	1	94716294-94716410
22129	Ttc3	SubName: Full=Putative uncharacterized protein;	chr16:94689607:94690828:+	3	94690278-94690404,94690508-94690607,94690412-94690484
320713	Mysm1	histone H2A deubiquitinase MYSM1	chr4:94608732:94613655:-	2	94609606-94609656,94611635-94611696
16206	Lrig1	leucine-rich repeats and immunoglobulin-like	chr6:94554523:94555752:-	2	94555123-94555192,94554662-94554705
264895	Acsf2	acyl-CoA synthetase family member 2,	chr11:94418416:94419620:-	1	94419235-94419288
110948	Hlcs	biotin--protein ligase	chr16:94350912:94353399:-	2	94352254-94352298,94352367-94352403
76742	Snx27	sorting nexin-27 isoform 2	chr3:94301466:94305978:-	9	94305768-94305841,94302740-94302790,94303403-94303463,94301704-94301740,94305542-94305600,94301508-94301562,94305411-94305454,94302681-94302737,94302376-94302458
170753	Zfp704	zinc finger protein 704	chr3:9427010:9438786:-	3	9427159-9427209,9434160-9434222,9438305-9438350
11800	AK078801	Mus musculus 16 days embryo lung cDNA, RIKEN full-length enriched library, clone:8430401M20 product:apoptosis inhibitory protein 5, full insert sequence.	chr2:94251884:94253915:-	3	94252675-94252718,94252513-94252573,94251925-94251975
78523	Mrpl9	39S ribosomal protein L9, mitochondrial	chr3:94251842:94252630:+	1	94251964-94252027
18786	Plaa	phospholipase A-2-activating protein	chr4:94231830:94236037:-	2	94236012-94236077,94235964-94236001
57748	Jmy	junction-mediating and -regulatory protein	chr13:94204157:94205374:-	6	94204343-94204422,94204300-94204339,94204473-94204550,94204158-94204208,94204577-94204696,94204240-94204280
71452	Ankrd40	ankyrin repeat domain-containing protein 40	chr11:94201013:94203161:+	4	94203079-94203127,94202196-94202236,94202537-94202586,94202485-94202520
26383	Fto	alpha-ketoglutarate-dependent dioxygenase FTO	chr8:94190334:94192332:+	8	94192019-94192140,94191778-94191823,94191507-94191560,94192142-94192261,94191924-94191998,94190569-94190632,94191432-94191487,94190456-94190549
26556	Homer1	homer protein homolog 1 isoform S	chr13:94172184:94174917:+	4	94173108-94173151,94173557-94173620,94173791-94173847,94172201-94172255
67684	Luc7l3	luc7-like protein 3	chr11:94152453:94154149:-	2	94152491-94152552,94153579-94153614
74569	AK136355	Mus musculus 15 days embryo embryonic body between diaphragm and neck cDNA, RIKEN full-length enriched library, clone:8130402C08 product:unclassifiable, full insert sequence.	chr2:94140923:94141892:-	4	94141146-94141191,94141287-94141324,94141097-94141142,94141526-94141569
75778	Them4	thioesterase superfamily member 4	chr3:94135502:94136454:+	2	94136395-94136435,94136325-94136380
22057	Tob1	protein Tob1	chr11:94076042:94076806:+	2	94076380-94076442,94076592-94076657
319880	Tmcc3	transmembrane and coiled-coil domains protein 3	chr10:94049775:94053699:+	7	94050612-94050672,94052428-94052464,94052097-94052157,94051873-94051930,94050985-94051031,94052676-94052745,94052355-94052411
70834	JSAP2	Mus musculus mRNA for JSAP2a, complete cds.	chr11:93984151:93987396:+	11	93985070-93985115,93987229-93987289,93987053-93987112,93986145-93986256,93986046-93986129,93986527-93986583,93984941-93984984,93985970-93986027,93985169-93985232,93987126-93987226,93985688-93985736
56348	Hsd17b12	estradiol 17-beta-dehydrogenase 12	chr2:93872854:93873713:-	1	93873104-93873155
208727	Hdac4	histone deacetylase 4	chr1:93829332:93829923:-	1	93829864-93829921
103537	Mbtd1	MBT domain-containing protein 1	chr11:93805207:93808298:+	3	93807391-93807426,93805377-93805428,93806662-93806702
14339	Aktip	AKT-interacting protein	chr8:93647398:93648469:-	3	93648013-93648075,93647797-93647873,93648078-93648144
19651	Rbl2	SubName: Full=Putative uncharacterized protein; Flags: Fragment;	chr8:93646345:93647743:+	2	93646995-93647069,93647224-93647270
12453	Ccni	cyclin-I	chr5:93610959:93612002:-	4	93611350-93611387,93611398-93611441,93611538-93611643,93611161-93611261
13998	Fgd6	FYVE, RhoGEF and PH domain-containing protein 6	chr10:93604534:93608084:+	1	93604818-93604853
52398	Sept11	septin-11	chr5:93600380:93603984:+	12	93603386-93603445,93603664-93603734,93602102-93602187,93603810-93603852,93602802-93602848,93602897-93602985,93600411-93600498,93601591-93601643,93603552-93603610,93603748-93603801,93600624-93600706,93600554-93600602
109151	Chd9	Mus musculus adult male colon cDNA, RIKEN full-length enriched library, clone:9030205D12 product:unclassifiable, full insert sequence.	chr8:93575871:93578407:+	5	93577334-93577431,93576010-93576057,93576777-93576863,93576871-93576932,93577487-93577541
65247	Asb1	ankyrin repeat and SOCS box protein 1 isoform a	chr1:93451455:93456167:+	5	93455266-93455326,93455157-93455219,93453549-93453601,93455401-93455452,93451711-93451754
106042	Prickle1	prickle-like protein 1	chr15:93329545:93330877:-	1	93329609-93329669
56307	Metap2	methionine aminopeptidase 2	chr10:93321235:93324094:-	10	93324044-93324088,93321982-93322082,93323937-93324034,93323854-93323918,93322979-93323039,93322450-93322530,93323697-93323778,93322385-93322448,93322229-93322290,93321484-93321526
223828	Pphln1	periphilin-1 isoform 1	chr15:93319599:93322343:+	4	93321416-93321455,93321695-93321730,93320424-93320471,93320186-93320226
18627	Per2	period circadian protein homolog 2	chr1:93312559:93314447:-	1	93312783-93312821
70788	Klhl30	kelch-like protein 30	chr1:93257843:93258981:+	1	93257886-93257981
67921	Ube2f	NEDD8-conjugating enzyme UBE2F	chr1:93181932:93182602:+	1	93182288-93182331
67974	Ccny	cyclin-Y	chr18:9314042:9316553:-	3	9314311-9314386,9314435-9314478,9315142-9315229
67057	YAF2	Mus musculus YAF2 mRNA for YY1 associated factor-2-a, complete cds.	chr15:93114264:93116053:-	2	93115073-93115140,93115384-93115467
223827	Gxylt1	glucoside xylosyltransferase 1	chr15:93070173:93075560:-	1	93072223-93072272
20338	Sel1l	protein sel-1 homolog 1 isoform b	chr12:93044483:93048283:-	12	93047111-93047149,93045921-93045984,93046005-93046092,93046727-93046780,93045693-93045744,93048061-93048103,93047169-93047223,93046561-93046645,93045642-93045689,93045528-93045598,93044536-93044575,93047944-93048008
52331	Stbd1	Mus musculus adult male tongue cDNA, RIKEN full-length enriched library, clone:2310031C01 product:unclassifiable, full insert sequence.	chr5:93034695:93035605:+	1	93035199-93035257
108800	Ston2	stonin-2	chr12:92871450:92878161:-	14	92877869-92877943,92874899-92874984,92871465-92871560,92871585-92871697,92872170-92872267,92877768-92877841,92871834-92871902,92875741-92875843,92876630-92876698,92874655-92874769,92875117-92875162,92878068-92878131,92876444-92876556,92872073-92872113
12492	Scarb2	lysosome membrane protein 2	chr5:92872899:92873271:-	3	92872897-92873022,92873033-92873122,92873235-92873275
83602	Gtf2a1	transcription initiation factor IIA subunit 1	chr12:92793703:92798183:-	11	92794159-92794202,92797244-92797305,92797080-92797133,92796020-92796082,92795393-92795451,92794980-92795034,92795319-92795375,92796904-92796942,92795932-92795980,92796557-92796612,92795889-92795927
231452	Sdad1	protein SDA1 homolog	chr5:92713036:92715848:-	2	92713150-92713192,92713038-92713085
13713	Elk3	Mus musculus 13 days embryo lung cDNA, RIKEN full-length enriched library, clone:D430049E23 product:ETS-DOMAIN PROTEIN ELK-3 (ETS-RELATED PROTEIN NET) (ETS-RELATED PROTEIN ERP), full insert sequence.	chr10:92710161:92712754:-	1	92712258-92712299
237459	Cdk17	cell division protein kinase 17	chr10:92702370:92704087:+	4	92703731-92703793,92703894-92703945,92702622-92702670,92702758-92702838
56041	Uso1	general vesicular transport factor p115	chr5:92630963:92631821:+	3	92630963-92631037,92631128-92631166,92631076-92631123
108679	Cops8	COP9 signalosome complex subunit 8	chr1:92508828:92509916:+	2	92508993-92509030,92509336-92509377
23881	G3bp2	ras GTPase-activating protein-binding protein 2	chr5:92481172:92483806:-	5	92481189-92481255,92481821-92481920,92482681-92482739,92483029-92483066,92481921-92481963
76969	DQ561039	DQ561039	chr2:92454577:92455409:+	1	92454556-92454605
53886	Cdkl2	cyclin-dependent kinase-like 2 isoform 1	chr5:92435101:92437106:-	3	92436061-92436106,92435209-92435252,92436609-92436667
54720	Rcan1	calcipressin-1 isoform 2	chr16:92392198:92393697:-	5	92392591-92392689,92392896-92392953,92393144-92393246,92392782-92392863,92392692-92392756
235527	Plscr4	phospholipid scramblase 4	chr9:92385645:92387354:+	1	92386036-92386071
67117	Dynlt3	dynein light chain Tctex-type 3	chrX:9231396:9233112:-	2	9231487-9231587,9232967-9233019
228368	Slc35c1	GDP-fucose transporter 1 isoform 1	chr2:92292922:92294371:-	2	92292933-92292995,92293011-92293058
236915	Arhgef9	rho guanine nucleotide exchange factor 9	chrX:92244283:92247311:-	3	92246979-92247033,92246549-92246610,92246435-92246481
12953	Cry2	cryptochrome-2	chr2:92243804:92245977:-	3	92244694-92244809,92243802-92243875,92245650-92245687
192285	Phf21a	PHD finger protein 21A isoform 2	chr2:92200580:92204823:+	5	92201670-92201715,92201727-92201807,92200878-92200937,92203390-92203431,92203565-92203611
53881	Slc5a3	sodium/myo-inositol cotransporter	chr16:92079458:92087718:+	1	92086755-92086792
66514	Asrgl1	L-asparaginase	chr19:9186209:9187489:-	3	9186375-9186438,9186240-9186290,9186597-9186653
66970	Ssbp2	SubName: Full=Putative uncharacterized protein;	chr13:91840300:91845780:+	1	91841569-91841619
347722	Agap1	arf-GAP with GTPase, ANK repeat and PH	chr1:91785469:91791857:+	1	91785944-91785984
94275	mFLJ00163	Mus musculus mRNA for Dlxin-1, complete cds.	chrX:91780813:91781016:-	1	91780851-91780893
65098	Zfand6	AN1-type zinc finger protein 6	chr7:91763564:91764329:-	4	91763738-91763855,91763948-91764007,91763569-91763674,91764153-91764208
217980	Larp4b	la-related protein 4B	chr13:9170188:9172336:+	8	9171484-9171566,9170810-9170856,9170254-9170305,9171054-9171117,9170699-9170739,9170967-9171024,9171861-9171958,9171729-9171810
21366	Slc6a6	sodium- and chloride-dependent taurine	chr6:91705051:91709057:+	6	91705100-91705158,91706641-91706763,91707123-91707204,91708239-91708292,91708793-91708914,91705159-91705263
20658	Son	protein SON truncated isoform	chr16:91678405:91679437:+	3	91678721-91678798,91678673-91678717,91679171-91679240
77975	Tmem50b	transmembrane protein 50B	chr16:91574753:91576357:-	2	91575347-91575411,91574813-91574911
15980	Ifngr2	interferon gamma receptor 2	chr16:91563250:91564252:+	2	91563997-91564082,91563721-91563757
51897	Atg13	autophagy-related protein 13	chr2:91514782:91516542:-	3	91516507-91516557,91515852-91515900,91515261-91515321
22764	Zfx	zinc finger X-chromosomal protein	chrX:91319970:91324134:-	12	91320007-91320095,91322286-91322331,91320334-91320395,91321266-91321303,91321463-91321519,91323349-91323414,91320173-91320244,91323244-91323301,91320418-91320487,91322353-91322413,91323936-91323973,91321768-91321827
74256	Cyld	ubiquitin carboxyl-terminal hydrolase CYLD	chr8:91270912:91275844:+	8	91273619-91273679,91271411-91271485,91271598-91271660,91273387-91273440,91272166-91272283,91272065-91272112,91274346-91274407,91272284-91272340
70178	Fam108c	abhydrolase domain-containing protein FAM108C1	chr7:91257866:91259091:-	4	91258280-91258321,91258914-91258961,91258772-91258829,91257893-91257947
77038	Arfgap2	ADP-ribosylation factor GTPase-activating	chr2:91115942:91117088:+	2	91115983-91116089,91116488-91116551
80708	Pacsin3	protein kinase C and casein kinase II substrate	chr2:91104463:91104836:+	2	91104581-91104643,91104420-91104481
66795	Atg10	ubiquitin-like-conjugating enzyme ATG10	chr13:91074954:91075850:-	1	91075510-91075584
26874	Abcd2	ATP-binding cassette sub-family D member 2	chr15:90976302:90979416:-	2	90979314-90979377,90977503-90977559
54563	Nup210	nuclear pore membrane glycoprotein 210	chr6:90963061:90964392:-	7	90963849-90963899,90963918-90963974,90963132-90963176,90964020-90964056,90964172-90964238,90963067-90963125,90964089-90964159
66395	Ahnak	AHNAK nucleoprotein isoform 1	chr19:9092814:9093685:+	2	9093401-9093436,9093126-9093191
13046	Celf1	CUGBP Elav-like family member 1 isoform 2	chr2:90856723:90857210:+	4	90857033-90857146,90856717-90856789,90856792-90856910,90856912-90856959
26992	Brd7	Mus musculus bromodomain-containing protein BP75 mRNA, complete cds.	chr8:90856211:90856386:-	2	90856326-90856383,90856248-90856321
16564	Kif21a	Mus musculus Kif21a (Kif21a) mRNA, complete cds.	chr15:90763707:90764880:-	5	90763854-90763924,90763730-90763824,90764616-90764666,90763963-90764034,90764209-90764245
67988	Tmx3	protein disulfide-isomerase TMX3 precursor	chr18:90709588:90712659:+	6	90710715-90710791,90711312-90711393,90711001-90711065,90711413-90711481,90710890-90710977,90711500-90711561
56428	Mtch2	Mus musculus domesticus mitochondrial carrier homolog 2 mRNA, complete cds; nuclear gene for mitochondrial product.	chr2:90705427:90706791:+	1	90706174-90706232
234549	Heatr3	HEAT repeat-containing protein 3	chr8:90694880:90695842:+	1	90695190-90695253
81702	Ankrd17	ankyrin repeat domain-containing protein 17	chr5:90656191:90658306:-	2	90657929-90658020,90657188-90657266
55935	Fnbp4	formin-binding protein 4	chr2:90619808:90621177:+	3	90620317-90620376,90620014-90620085,90620466-90620517
21917	Tmpo	Mus musculus 10 days embryo whole body cDNA, RIKEN full-length enriched library, clone:2610305J08 product:thymopoietin, full insert sequence.	chr10:90610316:90612220:-	5	90611918-90611959,90611381-90611461,90610370-90610459,90611208-90611272,90610501-90610546
71699	Slc41a3	solute carrier family 41 member 3 isoform 1	chr6:90595775:90596406:+	4	90595970-90596038,90595809-90595851,90596228-90596277,90596039-90596111
18674	Slc25a3	phosphate carrier protein, mitochondrial	chr10:90579323:90579708:-	1	90579354-90579389
59015	Gtl-13	Mus musculus gene trap locus-13 (Gtl-13) mRNA, complete cds.	chr2:90575661:90576485:+	1	90575662-90575699
11783	Apaf1	apoptotic protease-activating factor 1	chr10:90452056:90454194:-	1	90453565-90453609
20913	Stxbp4	syntaxin-binding protein 4	chr11:90337809:90341913:-	2	90341731-90341786,90338932-90339004
80292	Zxdc	RecName: Full=Zinc finger protein ZXDC;	chr6:90332520:90335388:+	2	90334333-90334369,90334887-90334936
20193	S100a1	protein S100-A1	chr3:90314956:90315142:-	1	90315020-90315102
66511	2500003M10Rik	Friend of PRMT1 protein	chr3:90302880:90303823:-	4	90303535-90303603,90303285-90303356,90303626-90303688,90303775-90303826
19271	Ptprj	receptor-type tyrosine-protein phosphatase eta	chr2:90273047:90276566:-	2	90275441-90275487,90274669-90274709
23942	Mta2	metastasis-associated protein MTA2	chr19:9026145:9026790:+	1	9026262-9026298
66074	Tmem167	protein kish-A precursor	chr13:90244050:90254526:+	4	90244804-90244859,90244470-90244514,90244681-90244789,90246036-90246132
217082	Hlf	hepatic leukemia factor	chr11:90197849:90202072:-	10	90200691-90200738,90199924-90199991,90200079-90200135,90201804-90201923,90199997-90200073,90201423-90201476,90200818-90200855,90200991-90201069,90201634-90201729,90198067-90198122
229542	Gatad2b	transcriptional repressor p66-beta	chr3:90161924:90162042:+	1	90161986-90162021
381280	A730008H23Rik	Holliday junction recognition protein	chr1:90159684:90161755:-	3	90160941-90160997,90160564-90160599,90161687-90161728
67468	Paqr11	Mus musculus adult male lung cDNA, RIKEN full-length enriched library, clone:1200017E07 product:monocyte to macrophage differentiation-associated, full insert sequence.	chr11:90138177:90139887:+	1	90139421-90139535
229541	Dennd4b	DENN domain-containing protein 4B	chr3:90083844:90084587:+	1	90084539-90084580
380959	Alg10b	RecName: Full=Putative alpha-1,2-glucosyltransferase ALG10-B; EC=2.4.1.-; AltName: Full=Alpha-2-glucosyltransferase ALG10-B; AltName: Full=Asparagine-linked glycosylation protein 10 homolog B;	chr15:90058810:90060985:+	6	90059915-90059996,90060317-90060428,90059151-90059198,90058771-90058832,90060451-90060531,90060007-90060078
23922	Jtb	protein JTB precursor	chr3:90039461:90039762:+	1	90039650-90039699
68263	Pdhb	pyruvate dehydrogenase E1 component subunit	chr14:8998505:8998849:-	3	8998545-8998666,8998780-8998816,8998668-8998778
14376	Ganab	Mus musculus 10 days neonate skin cDNA, RIKEN full-length enriched library, clone:4732427L16 product:alpha glucosidase 2, alpha neutral subunit, full insert sequence.	chr19:8990224:8991155:+	3	8990392-8990446,8990644-8990697,8990489-8990538
99650	4933434E20Rik	hypothetical protein LOC99650 isoform 1	chr3:89865755:89866369:+	1	89866110-89866156
227334	Usp40	ubiquitin carboxyl-terminal hydrolase 40 isoform	chr1:89841696:89843170:-	1	89841758-89841830
21844	Tiam1	T-lymphoma invasion and metastasis-inducing	chr16:89787356:89789366:-	3	89787367-89787434,89788737-89788791,89789246-89789355
72113	Adck1	aarF domain containing kinase 1 precursor	chr12:89699636:89700162:+	1	89699926-89699970
54403	Slc4a4	electrogenic sodium bicarbonate cotransporter 1	chr5:89664532:89668681:+	9	89665657-89665717,89666674-89666719,89666285-89666329,89665804-89665857,89665606-89665643,89665233-89665309,89666163-89666229,89664903-89664963,89664631-89664749
74114	Crot	SubName: Full=Putative uncharacterized protein;	chr5:8966048:8966851:-	2	8966498-8966586,8966788-8966829
17775	Laptm4a	lysosomal-associated transmembrane protein 4A	chr12:8944997:8945547:+	4	8944977-8945033,8945034-8945140,8945149-8945250,8945252-8945368
227331	Gigyf2	Mus musculus 10 days embryo whole body cDNA, RIKEN full-length enriched library, clone:2610016F01 product:RIKEN cDNA 2610016F01 gene, full insert sequence.	chr1:89345720:89347385:+	1	89346071-89346106
21985	Tpd52	tumor protein D52 isoform 1	chr3:8929436:8931051:-	3	8929491-8929550,8929968-8930040,8929823-8929869
229534	Pbxip1	pre-B-cell leukemia transcription	chr3:89252688:89254874:+	2	89253288-89253337,89254056-89254135
20437	Siah1a	E3 ubiquitin-protein ligase SIAH1A	chr8:89247839:89248904:-	1	89248614-89248681
12895	Cpt1b	carnitine O-palmitoyltransferase 1, muscle	chr15:89246836:89247326:-	1	89246990-89247067
68911	Pygo2	pygopus homolog 2	chr3:89237436:89239050:+	2	89238828-89238887,89237592-89237655
67053	Rpp14	ribonuclease P protein subunit p14	chr14:8922478:8924359:+	1	8922965-8923039
13178	Dck	deoxycytidine kinase	chr5:89210271:89212302:+	1	89211050-89211087
68473	Mobkl1a	Mus musculus 18-day embryo whole body cDNA, RIKEN full-length enriched library, clone:1110003E08 product:weakly similar to CELL CYCLE ASSOCIATED PROTEIN MOB1-1 [Trypanosoma brucei], full insert sequence.	chr5:89185197:89187480:+	3	89185269-89185319,89185227-89185266,89185749-89185805
18121	Nog	noggin precursor	chr11:89161952:89162635:-	1	89162422-89162457
26987	Eif4e2	eukaryotic translation initiation factor 4E type	chr1:89134460:89137063:+	4	89134475-89134552,89136123-89136241,89135376-89135433,89136242-89136285
231413	Grsf1	G-rich sequence factor 1 isoform 2	chr5:89088262:89089484:-	4	89088652-89088749,89088573-89088651,89088918-89089030,89088467-89088532
68693	Hnrnpul2	heterogeneous nuclear ribonucleoprotein U-like	chr19:8906025:8908632:+	6	8907874-8907964,8908517-8908569,8907179-8907221,8906252-8906297,8907061-8907170,8908226-8908324
66059	Krtcap2	keratinocyte-associated protein 2	chr3:89053613:89053644:+	1	89053588-89053634
54607	Cis4	Mus musculus cytokine inducible SH2-containing protein CIS4 (Cis4) mRNA, complete cds.	chr18:89037272:89038579:-	2	89037734-89037803,89037956-89038006
29877	Hdgfrp3	hepatoma-derived growth factor-related protein	chr7:89026142:89030963:-	1	89029963-89030021
68521	Fam189b	hypothetical protein LOC68521	chr3:88992661:88993211:+	1	88992834-88992885
15574	Hus1	RecName: Full=Checkpoint protein HUS1; Short=mHUS1;	chr11:8893145:8896852:-	1	8894104-8894159
83962	Btbd1	BTB/POZ domain-containing protein 1	chr7:88936960:88938453:-	3	88938237-88938280,88938121-88938174,88937200-88937257
14236	Foxn2	forkhead box N2	chr17:88886266:88889873:+	2	88886964-88887061,88889080-88889130
192195	Ash1l	probable histone-lysine N-methyltransferase	chr3:88881004:88883297:+	2	88882177-88882245,88882908-88882946
217069	Trim25	E3 ubiquitin/ISG15 ligase TRIM25	chr11:88878035:88881607:+	1	88878457-88878492
22439	Xk	membrane transport protein XK	chrX:8886875:8890371:+	6	8887744-8887801,8888543-8888603,8888645-8888690,8890139-8890194,8887042-8887093,8887292-8887361
70387	Ttc9c	tetratricopeptide repeat protein 9C	chr19:8883565:8886233:-	3	8884493-8884553,8883739-8883805,8884373-8884447
66902	Mtap	S-methyl-5'-thioadenosine phosphorylase	chr4:88825410:88826994:+	1	88826866-88826923
26557	Homer2	homer protein homolog 2 isoform 3	chr7:88745368:88755138:-	14	88748706-88748758,88746359-88746418,88746155-88746244,88745715-88745802,88746461-88746528,88745888-88745976,88746635-88746678,88746752-88746816,88750832-88750901,88749778-88749817,88749957-88750023,88754269-88754317,88747921-88747964,88745398-88745502
11640	Akap1	A-kinase anchor protein 1, mitochondrial	chr11:88692106:88693068:-	1	88692465-88692522
244091	Fsd2	fibronectin type III and SPRY domain-containing	chr7:88679240:88679881:-	1	88679640-88679705
102093	Phkb	Mus musculus B6-derived CD11 +ve dendritic cells cDNA, RIKEN full-length enriched library, clone:F730039M10 product:similar to phosphorylase kinase (EC 2.7.1.38) beta chain [Homo sapiens], full insert sequence.	chr8:88583341:88584541:+	7	88584019-88584132,88584290-88584347,88583453-88583505,88583806-88583922,88583945-88583992,88583627-88583718,88583337-88583452
69053	1810013L24Rik	hypothetical protein LOC69053	chr16:8856131:8859017:+	3	8856754-8856833,8857649-8857722,8857091-8857192
229521	Syt11	synaptotagmin-11	chr3:88548623:88551621:-	1	88549893-88549958
223770	mKIAA4191	Mus musculus 18-day embryo whole body cDNA, RIKEN full-length enriched library, clone:1110059H06 product:unclassifiable, full insert sequence.	chr15:88517465:88518726:-	3	88518598-88518651,88517887-88517993,88517787-88517878
74200	Kiaa0907	RecName: Full=UPF0469 protein KIAA0907;	chr3:88515751:88516853:+	1	88516691-88516736
382620	Tmed8	protein TMED8	chr12:88507192:88513363:-	1	88513244-88513282
207615	Wdr37	WD repeat-containing protein 37 isoform a	chr13:8849725:8852798:-	2	8849812-8849862,8850410-8850466
12877	Cpeb1	cytoplasmic polyadenylation element-binding	chr7:88492329:88493226:-	3	88492368-88492475,88492516-88492559,88493008-88493100
67706	Tmem179b	Mus musculus adult male kidney cDNA, RIKEN full-length enriched library, clone:0610031L02 product:unclassifiable, full insert sequence.	chr19:8847012:8847324:-	1	8847090-8847134
16800	Arhgef2	rho guanine nucleotide exchange factor 2 isoform	chr3:88450785:88451974:+	1	88451386-88451425
225055	Fbxo11	SubName: Full=Putative uncharacterized protein; Flags: Fragment;	chr17:88390199:88391385:-	2	88390353-88390420,88390759-88390864
94232	Ubqln4	ubiquilin-4	chr3:88372155:88373647:+	1	88373062-88373127
242521	Klhl9	kelch-like protein 9	chr4:88364196:88366052:-	6	88365607-88365676,88365971-88366027,88364361-88364432,88365210-88365267,88365733-88365802,88365115-88365159
56403	Syncrip	heterogeneous nuclear ribonucleoprotein Q	chr9:88344576:88349091:-	9	88348260-88348320,88344690-88344787,88346791-88346829,88347158-88347229,88346359-88346416,88347240-88347300,88348128-88348230,88346088-88346150,88344587-88344653
116904	Alpk3	alpha-protein kinase 3	chr7:88249202:88250498:+	4	88250308-88250388,88249908-88249999,88249782-88249903,88249709-88249781
17975	Ncl	nucleolin	chr1:88241294:88247194:-	2	88243851-88243914,88243395-88243455
71927	Itfg1	T-cell immunomodulatory protein precursor	chr8:88242439:88242766:-	2	88242445-88242558,88242569-88242620
238330	6430527G18Rik	enhanced at puberty protein 1	chr12:88221653:88222519:-	5	88221739-88221784,88221943-88222005,88221816-88221877,88221661-88221733,88222088-88222140
229517	Slc25a44	solute carrier family 25 member 44 isoform b	chr3:88214420:88216819:-	1	88214722-88214789
76626	msi2	Mus musculus msi2 mRNA for RNA-binding protein Musashi2-S, complete cds.	chr11:88152884:88158162:-	25	88154875-88154992,88157232-88157273,88157425-88157470,88154332-88154389,88153876-88153936,88154250-88154320,88156556-88156659,88158083-88158149,88156042-88156096,88155785-88155820,88155585-88155698,88157663-88157776,88157471-88157590,88157019-88157098,88154474-88154514,88156234-88156282,88155880-88155990,88157889-88157966,88155701-88155759,88155096-88155178,88157798-88157883,88152892-88152972,881…
56445	Dnaja2	dnaJ homolog subfamily A member 2	chr8:88061539:88063114:-	5	88062537-88062614,88062634-88062706,88062887-88062951,88062721-88062831,88062975-88063043
56529	Sec11a	signal peptidase complex catalytic subunit	chr7:88060265:88060739:-	1	88060737-88060783
103963	Rpn1	dolichyl-diphosphooligosaccharide--protein	chr6:88053541:88055298:+	1	88053779-88053831
108682	Gpt2	alanine aminotransferase 2	chr8:88049525:88051457:+	6	88049724-88049782,88051113-88051205,88049613-88049722,88050938-88051006,88050482-88050526,88049848-88049939
68737	Angel1	protein angel homolog 1	chr12:88041452:88043230:-	1	88041731-88041840
64656	Mrps23	28S ribosomal protein S23, mitochondrial	chr11:88024265:88025009:+	2	88024944-88024997,88024626-88024676
109272	Mybpc1	myosin binding protein C, slow type	chr10:87981029:87981314:-	1	87981287-87981342
17261	Mef2d	myocyte-specific enhancer factor 2D	chr3:87972565:87973089:+	1	87972630-87972708
212862	Chpt1	cholinephosphotransferase 1 isoform 1	chr10:87936222:87938149:-	4	87937048-87937130,87936634-87936687,87936749-87936810,87937510-87937567
432486	Gnptab	N-acetylglucosamine-1-phosphotransferase	chr10:87908585:87910074:+	1	87909882-87909920
22344	Vezf1	vascular endothelial zinc finger 1	chr11:87895327:87898231:+	10	87897731-87897785,87895399-87895471,87896354-87896467,87896497-87896607,87897270-87897341,87897124-87897230,87896673-87896791,87896819-87896883,87896241-87896350,87896046-87896108
110809	Srsf1	serine/arginine-rich splicing factor 1 isoform	chr11:87862771:87867259:+	3	87863447-87863518,87863330-87863441,87863861-87863898
12314	Calm2	calmodulin	chr17:87832741:87833366:-	5	87833249-87833309,87833119-87833185,87833327-87833370,87832886-87832934,87832964-87833034
17254	Slc3a2	Mus musculus mRNA for 4F2 heavy chain, complete cds.	chr19:8781372:8782212:-	1	8782139-8782244
64294	Itm2c	integral membrane protein 2C	chr1:87804213:87805273:+	2	87804969-87805014,87805070-87805126
68097	Gdi-1	Mus musculus Gdi-1 mRNA for RhoGDI-1, complete cds.	chr11:87793035:87794934:-	8	87793984-87794100,87794101-87794225,87793265-87793387,87793787-87793878,87793113-87793205,87793880-87793983,87794250-87794372,87794649-87794768
12785	Cnbp	cellular nucleic acid-binding protein isoform 1	chr6:87792609:87794032:-	5	87793141-87793259,87793699-87793824,87793603-87793659,87793825-87793894,87793966-87794045
65114	Vps35	vacuolar protein sorting-associated protein 35	chr8:87784291:87785028:-	4	87784343-87784404,87784882-87784920,87784621-87784728,87784812-87784862
12283	Cab39	Mus musculus lung RCB-0558 LLC cDNA, RIKEN full-length enriched library, clone:G730021G09 product:calcium binding protein 39, full insert sequence.	chr1:87745796:87748152:+	5	87747085-87747157,87746524-87746627,87746862-87746955,87746345-87746421,87747295-87747333
12013	Bach1	transcription regulator protein BACH1	chr16:87730116:87733591:+	2	87732094-87732132,87733497-87733549
70461	Crtc3	CREB-regulated transcription coactivator 3	chr7:87731518:87734628:-	1	87732064-87732108
15191	Hdgf	hepatoma-derived growth factor	chr3:87718830:87720054:+	1	87719659-87719735
70373	1700020O03Rik	hypothetical protein LOC70373	chr12:87629925:87632318:+	6	87630268-87630303,87629911-87629963,87630646-87630688,87630157-87630240,87630455-87630503,87630062-87630129
20684	Sp100	nuclear autoantigen Sp-100	chr1:87605693:87606023:+	1	87605731-87605792
224419	ORF63	TAK1-like protein	chr16:87594663:87595580:+	3	87595109-87595163,87595245-87595306,87594765-87594806
106014	Fam19a5	TAFA5 protein	chr15:87587735:87589794:+	1	87589406-87589446
212999	Tnpo2	transportin-2	chr8:87579450:87581481:+	2	87579942-87579993,87581362-87581477
80913	Pum2	pumilio homolog 2 isoform 2	chr12:8756526:8759387:+	10	8757636-8757680,8756967-8757035,8757367-8757430,8758841-8758919,8757883-8757936,8758288-8758400,8759179-8759264,8758986-8759095,8757533-8757633,8758705-8758776
68544	2310036O22Rik	hypothetical protein LOC68544	chr8:87553881:87554185:+	1	87554094-87554135
213498	Arhgef11	SubName: Full=Putative uncharacterized protein Arhgef11;	chr3:87541024:87541955:+	1	87541153-87541216
56468	Socs5	suppressor of cytokine signaling 5	chr17:87534584:87536925:+	7	87535570-87535625,87535735-87535788,87535401-87535462,87535647-87535730,87535876-87535946,87536425-87536486,87535978-87536031
16477	Junb	transcription factor jun-B	chr8:87500811:87501293:-	1	87501012-87501060
12469	Cct8	T-complex protein 1 subunit theta	chr16:87483570:87484232:-	1	87484118-87484225
170749	Mtmr4	myotubularin-related protein 4	chr11:87427755:87429798:+	1	87429117-87429156
70122	Mllt3	Mus musculus AF9 mRNA, partial cds.	chr4:87415829:87419918:-	18	87416233-87416311,87419312-87419379,87417532-87417592,87416445-87416500,87416502-87416601,87415927-87415972,87418379-87418435,87418688-87418805,87419099-87419206,87416718-87416758,87418577-87418673,87418822-87418905,87418299-87418337,87416143-87416196,87419223-87419291,87417953-87418057,87418485-87418539,87415973-87416016
16000	Igf1	insulin-like growth factor I isoform 2	chr10:87393445:87399792:+	8	87398362-87398402,87393629-87393682,87394211-87394270,87394362-87394459,87397864-87397936,87393986-87394036,87397465-87397570,87394064-87394106
104215	Rhoq	rho-related GTP-binding protein RhoQ precursor	chr17:87396400:87399409:+	10	87397099-87397161,87396765-87396847,87398277-87398383,87398686-87398773,87397359-87397418,87398015-87398108,87398120-87398238,87399183-87399252,87397856-87397976,87398971-87399008
78913	Rnf160	SubName: Full=Rnf160 protein;	chr16:87376896:87379189:-	3	87377826-87377885,87378133-87378194,87377723-87377764
12317	Calr	calreticulin precursor	chr8:87365987:87366545:-	1	87366252-87366364
27049	Etv3	SubName: Full=Putative uncharacterized protein Etv3;	chr3:87340574:87344078:+	1	87341582-87341645
23863	Dand5	DAN domain family member 5 precursor	chr8:87339304:87340186:-	1	87339905-87339951
231386	Ythdc1	YTH domain containing 1	chr5:87264933:87265682:+	3	87265273-87265323,87265503-87265551,87265215-87265271
209225	Zfp710	zinc finger protein 710 isoform b	chr7:87235229:87237637:+	1	87236584-87236627
13819	Epas1	endothelial PAS domain-containing protein 1	chr17:87230442:87232750:+	7	87232575-87232614,87230629-87230691,87231619-87231680,87231459-87231500,87232677-87232712,87231709-87231779,87232498-87232569
18032	Nfix	nuclear factor 1 X-type isoform 3	chr8:87231498:87232576:-	2	87232054-87232101,87232391-87232433
70420	2610034B18Rik	hypothetical protein LOC70420	chr7:87070245:87071727:-	1	87070631-87070676
14583	Gfpt1	SubName: Full=Putative uncharacterized protein Gfpt1;	chr6:87038152:87042201:+	13	87038701-87038793,87038802-87038857,87038436-87038514,87041812-87041872,87038371-87038425,87042001-87042119,87039650-87039746,87038905-87038968,87038580-87038657,87041918-87041975,87039764-87039868,87039490-87039539,87039955-87040035
11778	Ap3s2	AP-3 complex subunit sigma-2	chr7:87020211:87025369:-	5	87022744-87022781,87023007-87023076,87021257-87021355,87023143-87023189,87023923-87023986
269774	Aak1	AP2 associated kinase 1 isoform 2	chr6:86937292:86953221:+	5	86951539-86951593,86950683-86950730,86951415-86951472,86950786-86950830,86950052-86950101
252870	Hausp	Mus musculus herpesvirus-associated ubiquitin-specific protease (Hausp) mRNA, complete cds.	chr16:8688815:8690872:-	3	8690021-8690087,8689692-8689800,8689826-8689914
14281	Fos	proto-oncogene c-Fos	chr12:86817408:86818219:+	2	86817640-86817689,86817691-86817750
67873	Mri1	methylthioribose-1-phosphate isomerase	chr8:86773805:86775449:-	1	86775033-86775075
77864	Ypel2	protein yippee-like 2	chr11:86749927:86754100:-	3	86750782-86750847,86750021-86750074,86753838-86753947
212168	Zswim4	zinc finger SWIM domain-containing protein 4	chr8:86734841:86735844:-	2	86735073-86735150,86735419-86735472
11746	Anxa4	annexin A4	chr6:86686834:86687757:-	2	86687458-86687493,86687114-86687159
68581	Tmed10	transmembrane emp24 domain-containing protein 10	chr12:86681564:86684377:-	7	86683593-86683677,86683479-86683581,86682031-86682094,86683204-86683296,86681624-86681678,86682960-86683084,86682748-86682802
23885	Gmcl1	germ cell-less protein-like 1	chr6:86641762:86642916:-	1	86642428-86642492
217718	Nek9	serine/threonine-protein kinase Nek9	chr12:86640464:86642753:-	7	86641197-86641255,86641853-86641957,86641743-86641852,86640596-86640647,86641979-86642033,86640839-86640874,86640463-86640583
17119	Mxd1	max dimerization protein 1	chr6:86597039:86600864:-	3	86600672-86600713,86598935-86598994,86597767-86597864
80877	Lrba	lipopolysaccharide-responsive and beige-like	chr3:86585583:86586616:+	1	86586399-86586471
67487	Dhx40	probable ATP-dependent RNA helicase DHX40	chr11:86582351:86583623:-	2	86582467-86582524,86582769-86582812
217716	Mlh3	DNA mismatch repair protein Mlh3	chr12:86575470:86576571:-	1	86576281-86576356
666704	Samd1	atherin	chr8:86523774:86524285:+	1	86524068-86524128
18747	Prkaca	cAMP-dependent protein kinase catalytic subunit	chr8:86519316:86520344:+	2	86519960-86520073,86520082-86520195
67300	AK049578	Mus musculus 7 days embryo whole body cDNA, RIKEN full-length enriched library, clone:C430045L21 product:CLATHRIN HEAVY CHAIN 1 (CLH-17) homolog [Homo sapiens], full insert sequence.	chr11:86508155:86509067:-	6	86508758-86508800,86508240-86508346,86508682-86508755,86508828-86508945,86508178-86508233,86508363-86508486
17436	Me1	NADP-dependent malic enzyme isoform 2	chr9:86474970:86476343:-	8	86474997-86475089,86475797-86475916,86475942-86475996,86475452-86475501,86476140-86476189,86475665-86475783,86475590-86475663,86475164-86475275
23983	Pcbp1	poly(rC)-binding protein 1	chr6:86474491:86474838:-	1	86474503-86474623
78920	Dlst	dihydrolipoyllysine-residue succinyltransferase	chr12:86473703:86475041:+	2	86474409-86474458,86473846-86473896
21841	Tia1	Mus musculus adult male testis cDNA, RIKEN full-length enriched library, clone:4930579N17 product:cytotoxic granule-associated RNA binding protein 1, full insert sequence.	chr6:86380361:86383399:+	1	86381253-86381313
66690	Tmem186	transmembrane protein 186	chr16:8633824:8635837:-	2	8634532-8634576,8634714-8634792
72508	AK165329	Mus musculus 6 days neonate spleen cDNA, RIKEN full-length enriched library, clone:F430010B03 product:hypothetical protein, full insert sequence.	chr11:86312513:86316226:-	7	86315710-86315745,86313953-86314019,86314672-86314716,86313216-86313263,86315412-86315477,86315357-86315407,86313869-86313928
76892	Rnft1	RING finger and transmembrane domain-containing	chr11:86309457:86312509:+	1	86309548-86309583
103466	Nt5dc3	5'-nucleotidase domain-containing protein 3	chr10:86296928:86301134:+	17	86300947-86301014,86298014-86298082,86300846-86300941,86299928-86300044,86298211-86298327,86297891-86297955,86300119-86300220,86300339-86300402,86297428-86297475,86298094-86298130,86298942-86298986,86300413-86300531,86298141-86298210,86299497-86299619,86300045-86300103,86298357-86298460,86300533-86300629
68441	Rraga	ras-related GTP-binding protein A	chr4:86222764:86223185:+	1	86222844-86222905
13642	Efnb2	ephrin-B2 precursor	chr8:8617439:8620587:-	1	8618478-8618523
81489	Dnajb1	dnaJ homolog subfamily B member 1	chr8:86134718:86135801:+	3	86134987-86135036,86135079-86135155,86135379-86135416
67963	Npc2	epididymal secretory protein E1 precursor	chr12:86095509:86098075:-	2	86097377-86097426,86097314-86097353
106529	Tecr	SubName: Full=Putative uncharacterized protein;	chr8:86095599:86095706:-	1	86095611-86095669
327987	Med13	mediator of RNA polymerase II transcription	chr11:86079217:86084487:-	6	86080590-86080635,86083783-86083894,86083719-86083766,86083164-86083205,86081481-86081536,86083914-86083992
76375	Det1	DET1 homolog	chr7:85972360:85972808:-	1	85972509-85972561
72102	Dusp11	RNA/RNP complex-1-interacting phosphatase	chr6:85892265:85897598:-	3	85894982-85895033,85897260-85897345,85892295-85892348
244548	Elmod2	ELMO domain-containing protein 2	chr8:85836531:85840214:-	8	85837978-85838036,85836940-85837001,85839433-85839532,85837081-85837132,85839730-85839782,85838855-85838900,85838424-85838501,85839340-85839377
21859	Timp3	Mus musculus brain cDNA, clone MNCb-5810, similar to Mus musculus tissue inhibitor of metalloproteinase 3 (Timp3), mRNA.	chr10:85808647:85812250:+	9	85810332-85810372,85811081-85811153,85810102-85810142,85810440-85810479,85811005-85811061,85812043-85812130,85809816-85809880,85811653-85811714,85811489-85811533
104776	Aldh6a1	methylmalonate-semialdehyde dehydrogenase	chr12:85771668:85773393:-	7	85772224-85772342,85772075-85772140,85772787-85772897,85773092-85773192,85771706-85771792,85772915-85772999,85772376-85772449
12499	Entpd5	ectonucleoside triphosphate diphosphohydrolase 5	chr12:85714807:85718243:-	4	85717114-85717153,85716979-85717033,85717167-85717218,85717555-85717599
320302	Glt28d2	Mus musculus 10 days neonate skin cDNA, RIKEN full-length enriched library, clone:4732486J07 product:hypothetical UDP-Glycosyltransferase/glycogen phosphorylase structure containing protein, full insert sequence.	chr3:85673768:85675588:-	2	85674252-85674317,85673892-85673946
77219	Ptgr2	prostaglandin reductase 2	chr12:85654963:85656782:+	2	85655541-85655593,85655364-85655439
19013	Ppara	peroxisome proliferator-activated receptor	chr15:85631688:85637281:+	4	85637144-85637196,85636251-85636297,85633416-85633465,85632793-85632846
108837	mKIAA1417	Mus musculus adult male thymus cDNA, RIKEN full-length enriched library, clone:5830448N01 product:hypothetical Regulator of chromosome condensation, RCC1/Ankyrin/BTB/POZ containing protein, full insert sequence.	chr9:85580963:85581989:-	6	85581588-85581664,85581370-85581479,85581722-85581827,85581234-85581300,85581480-85581573,85581103-85581200
105000	Dnalc1	dynein light chain 1, axonemal	chr12:85479344:85484460:+	5	85480706-85480754,85482875-85482913,85479550-85479596,85479607-85479673,85479385-85479421
170772	Glcci1	glucocorticoid-induced transcript 1 protein	chr6:8543252:8547548:+	1	8547365-8547410
229488	Fam160a1	hypothetical protein LOC229488	chr3:85463985:85464886:-	1	85464319-85464363
19043	Ppm1b	protein phosphatase 1B isoform 3	chr17:85414787:85416468:+	3	85415193-85415243,85415992-85416039,85416334-85416407
72843	Prdm4	RecName: Full=PR domain zinc finger protein 4; AltName: Full=PR domain-containing protein 4; Flags: Fragment;	chr10:85354713:85355874:-	1	85355102-85355138
218397	Rasa1	RAS p21 protein activator 1	chr13:85354304:85355708:-	3	85354877-85354933,85354935-85354973,85354698-85354789
59021	Rab2a	ras-related protein Rab-2A	chr4:8533650:8534849:+	6	8534338-8534454,8534656-8534720,8533940-8534026,8534550-8534654,8533844-8533936,8534272-8534319
54138	Atxn10	ataxin-10	chr15:85293353:85294266:+	1	85293488-85293614
52055	Rab11fip5	rab11 family-interacting protein 5 isoform 1	chr6:85284956:85287016:-	4	85286537-85286582,85286472-85286519,85286970-85287014,85285626-85285676
94282	Sfxn5	sideroflexin-5	chr6:85163049:85165662:-	1	85163063-85163100
72416	Lrpprc	leucine-rich PPR motif-containing protein,	chr17:85104587:85104755:-	2	85104599-85104694,85104704-85104775
11852	Rhob	rho-related GTP-binding protein RhoB precursor	chr12:8504565:8505847:-	2	8504956-8505021,8504748-8504800
23796	Aplnr	apelin receptor	chr2:84977923:84980079:+	1	84979252-84979307
11820	App	amyloid beta A4 protein isoform 1 precursor	chr16:84954688:84955575:-	3	84955299-84955340,84955181-84955231,84954983-84955037
14390	Gabpa	GA-binding protein alpha chain	chr16:84860848:84864023:+	2	84861676-84861714,84863164-84863200
237898	Usp32	ubiquitin specific protease 32	chr11:84797990:84799911:-	3	84798018-84798078,84798137-84798178,84798576-84798629
223739	5031439G07Rik	hypothetical protein LOC223739	chr15:84776150:84779667:-	7	84778441-84778482,84776962-84777033,84776852-84776957,84776739-84776841,84776241-84776288,84777910-84777970,84776606-84776678
14897	Trip12	thyroid hormone receptor interactor 12	chr1:84717764:84721192:-	12	84720651-84720761,84720503-84720544,84720455-84720495,84720839-84720922,84719987-84720050,84720153-84720258,84720358-84720439,84718215-84718266,84720091-84720151,84718599-84718662,84719413-84719466,84720594-84720641
102941	B630019K06Rik	hypothetical protein LOC102941	chrX:8470885:8472089:+	1	8471617-8471680
56791	Ube2l6	ubiquitin/ISG15-conjugating enzyme E2 L6	chr2:84649313:84650158:+	1	84649417-84649472
234515	Inpp4b	type II inositol-3,4-bisphosphate 4-phosphatase	chr8:84645290:84646460:+	1	84645862-84645900
217038	Mrm1	rRNA methyltransferase 1, mitochondrial	chr11:84626563:84627933:-	1	84626586-84626623
103266	AI597468	hypothetical protein LOC103266	chr10:84577439:84580492:+	2	84578824-84578909,84577965-84578013
12388	Ctnnd1	catenin delta-1 isoform 3	chr2:84440938:84443048:-	3	84442065-84442102,84442249-84442301,84441109-84441163
99889	Arfip1	arfaptin-1	chr3:84299986:84301657:-	4	84300414-84300490,84301360-84301436,84300119-84300157,84301062-84301102
225791	Zadh2	zinc-binding alcohol dehydrogenase	chr18:84264726:84266906:+	2	84266391-84266456,84264821-84264884
54598	Calcrl	calcitonin gene-related peptide type 1 receptor	chr2:84170791:84173610:-	3	84170935-84171003,84171640-84171677,84171145-84171182
170736	Parvb	beta-parvin	chr15:84143461:84146039:+	1	84144721-84144757
216198	Tcp11l2	T-complex protein 11-like protein 2	chr10:84076471:84077100:+	1	84076686-84076776
217031	Tada2a	transcriptional adapter 2-alpha	chr11:83892422:83893093:-	3	83892894-83892933,83892443-83892478,83892485-83892548
75296	Fgfr1op	FGFR1 oncogene partner isoform 1	chr17:8387460:8389333:+	2	8388403-8388451,8387766-8387801
56405	Dusp14	dual specificity protein phosphatase 14	chr11:83861547:83862118:-	1	83861582-83861618
217030	Synrg	synergin gamma isoform 1	chr11:83854430:83855581:+	2	83854660-83854702,83854854-83854910
17260	Mef2c	myocyte-specific enhancer factor 2C isoform 2	chr13:83802236:83802948:+	5	83802467-83802579,83802357-83802405,83802584-83802693,83802419-83802457,83802240-83802356
78394	Ddx52	probable ATP-dependent RNA helicase DDX52	chr11:83775309:83776579:+	1	83776404-83776439
232164	Paip2b	polyadenylate-binding protein-interacting	chr6:83756053:83758829:-	7	83757982-83758075,83757888-83757948,83757538-83757576,83756923-83756971,83758182-83758221,83757655-83757735,83757772-83757836
16410	Itgav	SubName: Full=Integrin alpha V; Flags: Fragment;	chr2:83643492:83647073:+	8	83646819-83646862,83644309-83644346,83646387-83646433,83644136-83644198,83646723-83646769,83646272-83646327,83646618-83646676,83644202-83644247
69082	Zc3h15	zinc finger CCCH domain-containing protein 15	chr2:83504167:83504773:+	1	83504490-83504596
319939	Tns3	tensin-3	chr11:8331655:8334496:-	4	8332903-8332975,8332597-8332659,8332796-8332857,8332686-8332724
232157	Mobkl1b	mps one binder kinase activator-like 1B	chr6:83290247:83290943:+	1	83290710-83290770
14388	Gab1	GRB2-associated-binding protein 1	chr8:83288333:83290227:-	9	83288469-83288528,83288671-83288777,83288791-83288876,83289549-83289609,83289299-83289358,83288541-83288611,83288996-83289102,83289445-83289493,83288916-83288992
93762	Smarca5	SWI/SNF-related matrix-associated	chr8:83223843:83224961:-	3	83224368-83224451,83223914-83223951,83223966-83224003
71770	Ap2b1	AP-2 complex subunit beta isoform b	chr11:83216146:83218535:+	2	83216179-83216236,83216517-83216578
101739	Psip1	PC4 and SFRS1-interacting protein	chr4:83101585:83102922:-	2	83102787-83102822,83102604-83102661
77634	Snapc3	snRNA-activating protein complex subunit 3	chr4:83099092:83099244:+	1	83099173-83099208
54604	Pcnx	pecanex-like protein 1	chr12:83097149:83101911:+	9	83098696-83098782,83099581-83099653,83098104-83098140,83098555-83098600,83098260-83098351,83098903-83098956,83100449-83100501,83100536-83100604,83098457-83098534
73826	Poldip3	polymerase delta-interacting protein 3	chr15:82956408:82958310:-	5	82956712-82956769,82958155-82958197,82956435-82956486,82956629-82956671,82958035-82958144
15463	Agfg1	arf-GAP domain and FG repeats-containing protein	chr1:82891633:82892850:+	6	82891959-82892010,82892230-82892288,82891683-82891734,82891822-82891867,82891630-82891679,82892503-82892544
66724	Tab3	TGF-beta-activated kinase 1 and MAP3K7-binding	chrX:82875893:82879653:+	2	82878849-82878905,82878618-82878679
69863	Ttc39b	tetratricopeptide repeat protein 39B	chr4:82866205:82873037:-	1	82866528-82866569
327978	Slfn5	schlafen family member 5	chr11:82775206:82778352:+	1	82776033-82776075
83946	Phip	PH-interacting protein	chr9:82759766:82764830:-	5	82761291-82761332,82760093-82760191,82760240-82760289,82761246-82761290,82763310-82763381
217012	Unc45b	protein unc-45 homolog B	chr11:82756253:82756908:+	5	82756366-82756492,82756504-82756616,82756758-82756816,82756687-82756743,82756240-82756276
75734	Mff	mitochondrial fission factor	chr1:82748291:82748964:+	5	82748399-82748462,82748616-82748687,82748477-82748595,82748809-82748924,82748692-82748750
15277	Hk2	hexokinase-2	chr6:82675021:82677303:-	9	82675038-82675150,82675388-82675502,82677156-82677223,82675515-82675567,82675928-82676011,82675254-82675339,82676572-82676669,82676154-82676200,82676455-82676571
58250	Chst11	carbohydrate sulfotransferase 11	chr10:82654544:82658636:+	2	82656114-82656158,82657046-82657109
21411	Tcf20	transcription factor 20 isoform a	chr15:82639055:82640217:-	1	82639116-82639154
24071	Synj2bp	synaptojanin-2-binding protein	chr12:82593183:82603012:-	2	82601545-82601599,82600503-82600550
66979	Pole4	DNA polymerase epsilon subunit 4	chr6:82596706:82598016:-	4	82597074-82597133,82597372-82597415,82597297-82597352,82597683-82597731
66272	Cox16	cytochrome c oxidase assembly protein COX16	chr12:82571691:82573221:-	1	82572619-82572674
13405	dystrophin	Mus musculus adult retina cDNA, RIKEN full-length enriched library, clone:A930019F21 product:DYSTROPHIN homolog [Mus musculus], full insert sequence.	chrX:82447821:82450389:+	5	82447975-82448027,82448034-82448085,82449065-82449133,82448799-82448850,82449022-82449062
68268	Zdhhc21	probable palmitoyltransferase ZDHHC21	chr4:82444643:82452232:-	12	82444987-82445093,82449882-82449978,82445097-82445147,82448021-82448090,82451004-82451054,82448457-82448541,82446687-82446735,82448358-82448399,82448598-82448634,82445526-82445571,82450895-82450956,82449518-82449592
76867	Rhbdd1	rhomboid domain-containing protein 1	chr1:82439529:82441941:+	1	82441744-82441783
71175	AK020398	Mus musculus 12 days embryo embryonic body between diaphragm region and neck cDNA, RIKEN full-length enriched library, clone:9430001O08 product:inferred: IDN3 {Homo sapiens}, full insert sequence.	chr15:8241987:8242091:-	1	8242020-8242099
50493	Txnrd1	SubName: Full=Thioredoxin reductase 1; Flags: Fragment;	chr10:82358790:82360469:+	9	82360284-82360386,82359961-82360016,82359137-82359186,82360121-82360158,82359294-82359387,82359779-82359817,82359197-82359271,82359573-82359649,82359077-82359126
16367	Irs1	insulin receptor substrate 1	chr1:82229680:82234179:-	15	82233373-82233489,82232141-82232225,82231473-82231527,82231187-82231249,82229794-82229902,82229679-82229790,82231671-82231717,82233603-82233666,82232868-82232978,82232228-82232300,82233312-82233361,82230009-82230116,82231601-82231656,82230132-82230250,82233691-82233791
18045	Nfyb	nuclear transcription factor Y subunit beta	chr10:82211445:82213159:-	3	82212007-82212115,82211575-82211635,82211903-82211951
24015	Abce1	ATP-binding cassette sub-family E member 1	chr8:82207341:82209128:-	1	82208641-82208696
73945	Otud4	OTU domain-containing protein 4	chr8:82197881:82201654:+	21	82199841-82199937,82200634-82200732,82199632-82199701,82200998-82201117,82199527-82199567,82199163-82199247,82199253-82199321,82199711-82199835,82198736-82198855,82198190-82198243,82201408-82201512,82201284-82201348,82198518-82198579,82198391-82198443,82198947-82199054,82200886-82200957,82199055-82199096,82200499-82200599,82201218-82201273,82199419-82199526,82200365-82200464
213582	Mtap9	microtubule-associated protein 9	chr3:82195172:82199190:+	1	82198596-82198652
20384	Srsf5	Mus musculus adult female placenta cDNA, RIKEN full-length enriched library, clone:1600028A20 product:splicing factor, arginine/serine-rich 5 (SRp40, HRS), full insert sequence.	chr12:82050965:82051494:+	1	82051193-82051245
20788	Srebf2	SubName: Full=Putative uncharacterized protein; SubName: Full=Srebf2 protein;	chr15:82034347:82035390:+	1	82034363-82034461
217684	4933426M11Rik	hypothetical protein LOC217684	chr12:81978108:81981820:+	4	81979705-81979763,81980065-81980135,81980285-81980386,81979142-81979219
18028	Nfib	nuclear factor 1 B-type isoform 3	chr4:81936077:81942697:-	24	81940938-81940989,81938928-81938967,81936162-81936238,81939656-81939710,81941168-81941230,81940622-81940746,81940778-81940846,81937945-81938022,81941970-81942036,81938067-81938102,81942187-81942264,81936848-81936884,81940268-81940348,81942282-81942396,81938630-81938694,81937800-81937870,81941030-81941086,81938825-81938922,81937448-81937544,81936585-81936642,81937365-81937424,81937237-81937363,819…
12626	Cetn3	centrin-3	chr13:81935696:81936156:+	1	81935727-81935765
60596	Gucy1a3	guanylate cyclase soluble subunit alpha-3	chr3:81896350:81898616:-	3	81898211-81898266,81898035-81898083,81898152-81898193
72852	Mblac2	metallo-beta-lactamase domain-containing protein	chr13:81889345:81892274:+	1	81889352-81889395
252875	Mios	WD repeat-containing protein mio	chr6:8185481:8186271:+	1	8185725-8185770
67486	Polr3g	DNA-directed RNA polymerase III subunit RPC7	chr13:81812836:81815034:-	2	81813696-81813739,81814901-81814943
105859	Csdc2	cold shock domain-containing protein C2	chr15:81779698:81781371:+	1	81779781-81779827
20541	Slc8a1	sodium/calcium exchanger 1 isoform B	chr17:81772445:81788030:-	4	81776390-81776434,81785257-81785343,81785370-81785459,81785142-81785192
11429	Aco2	aconitate hydratase, mitochondrial precursor	chr15:81745192:81745567:+	1	81745223-81745277
68479	Phf5a	PHD finger-like domain-containing protein 5A	chr15:81694946:81696232:-	1	81695915-81695960
57259	Tob2	protein Tob2	chr15:81678700:81681158:-	8	81678929-81679005,81680763-81680798,81680207-81680313,81678778-81678848,81679220-81679272,81680343-81680435,81679452-81679517,81680527-81680591
21685	Tef	Mus musculus 18-day embryo whole body cDNA, RIKEN full-length enriched library, clone:1110038L23 product:unclassifiable, full insert sequence.	chr15:81654111:81657291:+	5	81656012-81656112,81656995-81657068,81654724-81654794,81655699-81655819,81655431-81655489
20286	Zc3h7b	zinc finger CCCH domain-containing protein 7B	chr15:81624195:81626699:+	2	81625936-81625994,81625820-81625912
97827	Exd2	exonuclease 3'-5' domain-containing protein 2	chr12:81597984:81599122:+	1	81598428-81598486
19387	Rangap1	ran GTPase-activating protein 1	chr15:81534678:81535618:-	5	81534795-81534834,81535268-81535314,81534691-81534790,81535227-81535267,81535325-81535368
320808	Dcaf5	DDB1- and CUL4-associated factor 5	chr12:81437674:81439496:-	4	81439141-81439262,81438996-81439098,81439327-81439389,81438291-81438348
68027	Tmem178	transmembrane protein 178 precursor	chr17:81400411:81401156:+	1	81401086-81401123
56438	Rbx1	E3 ubiquitin-protein ligase RBX1	chr15:81305528:81306799:+	2	81305597-81305717,81305519-81305573
70356	St13	hsc70-interacting protein	chr15:81195474:81195879:-	1	81195502-81195545
170762	Nup155	nuclear pore complex protein Nup155	chr15:8107764:8109859:+	3	8109546-8109603,8108488-8108538,8108399-8108444
105171	mKIAA1376	Mus musculus adult retina cDNA, RIKEN full-length enriched library, clone:A930004L03 product:hypothetical Immunoglobulin structure containing protein, full insert sequence.	chr13:81032687:81035303:+	7	81034036-81034083,81033187-81033256,81033563-81033678,81034731-81034836,81035121-81035230,81033427-81033539,81033344-81033405
14797	Aes	amino-terminal enhancer of split	chr10:81028438:81029109:+	3	81028956-81029075,81028652-81028742,81028887-81028941
14672	Gna11	guanine nucleotide-binding protein subunit	chr10:80991477:80993539:-	2	80991476-80991518,80991633-80991681
225028	Map4k3	mitogen-activated protein kinase kinase kinase	chr17:80979852:80981187:-	1	80980419-80980462
17475	Mpdz	multiple PDZ domain protein	chr4:80924404:80925526:-	7	80924821-80924936,80925064-80925133,80924481-80924535,80924955-80925052,80925414-80925477,80924692-80924757,80924553-80924596
18029	Nfic	nuclear factor 1 C-type isoform b	chr10:80858936:80863816:-	12	80861111-80861230,80859566-80859607,80859290-80859343,80860818-80860878,80860590-80860703,80861238-80861347,80859349-80859444,80860159-80860210,80859232-80859274,80859870-80859969,80859038-80859144,80859000-80859037
56371	Fzr1	fizzy-related protein homolog	chr10:80829624:80830253:-	1	80829734-80829846
20662	Sos1	son of sevenless homolog 1	chr17:80793092:80797520:-	7	80793406-80793527,80797061-80797106,80793816-80793869,80796444-80796480,80793564-80793636,80795591-80795650,80796669-80796788
18717	Pip5k1c	phosphatidylinositol-4-phosphate 5-kinase type-1	chr10:80780513:80782714:+	2	80782368-80782429,80782129-80782193
213988	Tnrc6b	trinucleotide repeat-containing gene 6B protein	chr15:80759906:80771516:+	31	80761741-80761838,80763363-80763409,80769802-80769887,80760454-80760502,80761959-80762020,80762621-80762663,80765291-80765387,80767417-80767516,80768638-80768696,80764963-80765069,80768081-80768203,80764255-80764360,80760520-80760636,80765778-80765866,80769728-80769775,80768516-80768596,80767775-80767820,80764167-80764222,80760309-80760367,80765692-80765774,80765399-80765443,80767979-80768047,807…
16969	Zbtb7a	zinc finger and BTB domain-containing protein	chr10:80611180:80614402:+	1	80613677-80613722
225027	Srsf7	serine/arginine-rich splicing factor 7 isoform	chr17:80599420:80600887:-	4	80600124-80600169,80599494-80599568,80599629-80599670,80599968-80600047
26396	Map2k2	dual specificity mitogen-activated protein	chr10:80586475:80587442:+	1	80586521-80586559
52551	Sgta	small glutamine-rich tetratricopeptide	chr10:80506818:80507748:-	2	80507566-80507656,80506888-80506949
106947	Slc39a3	zinc transporter ZIP3	chr10:80491285:80493701:-	1	80493457-80493509
72692	AK034420	Mus musculus adult male diencephalon cDNA, RIKEN full-length enriched library, clone:9330189A14 product:unclassifiable, full insert sequence.	chr17:80428827:80429824:-	4	80428987-80429030,80429204-80429246,80429696-80429754,80429590-80429642
211978	Zfyve26	zinc finger FYVE domain-containing protein 26	chr12:80333334:80334952:-	2	80334727-80334762,80334546-80334606
18245	Oaz1	Mus musculus 18-day embryo whole body cDNA, RIKEN full-length enriched library, clone:1110005A09 product:ornithine decarboxylase antizyme, full insert sequence.	chr10:80291749:80292035:+	1	80291957-80291992
71912	Jsrp1	junctional sarcoplasmic reticulum protein 1	chr10:80271246:80271316:-	1	80271256-80271291
26554	Cul3	cullin-3	chr1:80263393:80263730:-	1	80263444-80263560
53612	Vti1b	vesicle transport through interaction with	chr12:80257005:80257461:-	1	80257334-80257395
56298	Atl2	atlastin-2 isoform 1	chr17:80247732:80249498:-	13	80248550-80248673,80248869-80248969,80247731-80247815,80248423-80248548,80249152-80249258,80249265-80249382,80249428-80249499,80248365-80248418,80248130-80248179,80247837-80247903,80248756-80248857,80248044-80248101,80248198-80248292
22680	Zfp207	zinc finger protein 207 isoform 1	chr11:80209052:80209750:+	2	80209467-80209567,80209282-80209365
66861	Dnajc10	SubName: Full=Putative uncharacterized protein; Flags: Fragment;	chr2:80193027:80194212:+	2	80193773-80193816,80193205-80193277
70591	5730455P16Rik	protein Njmu-R1	chr11:80174701:80177313:-	5	80177079-80177138,80175284-80175363,80176607-80176661,80175777-80175832,80177247-80177292
17347	Mknk2	MAP kinase-interacting serine/threonine-protein	chr10:80128074:80129851:-	3	80128086-80128152,80128574-80128627,80128656-80128734
11911	Atf4	cyclic AMP-dependent transcription factor ATF-4	chr15:80087890:80087971:+	1	80087852-80087967
239555	Smcr7l	Smith-Magenis syndrome chromosomal region	chr15:80080565:80083154:+	5	80081336-80081397,80080767-80080802,80080652-80080765,80081930-80081974,80080866-80080935
59040	BC055823	Mus musculus 7 days embryo whole body cDNA, RIKEN full-length enriched library, clone:C430039G08 product:unclassifiable, full insert sequence.	chr11:80079361:80081409:+	2	80079710-80079760,80080100-80080202
56214	Scamp4	secretory carrier-associated membrane protein 4	chr10:80077528:80078528:+	1	80077877-80077937
67955	Sugt1	suppressor of G2 allele of SKP1 homolog	chr14:80028760:80029562:+	4	80028841-80028894,80028974-80029052,80028759-80028821,80029068-80029106
73834	Atp6v1d	V-type proton ATPase subunit D	chr12:79943969:79944455:-	3	79944002-79944040,79944157-79944217,79944373-79944427
21423	Tcf3	transcription factor E2-alpha isoform 1	chr10:79871910:79872876:-	1	79872336-79872374
22380	Wbp4	WW domain-binding protein 4	chr14:79859744:79861728:-	4	79860907-79860973,79860054-79860108,79861402-79861452,79860580-79860619
54394	Crlf3	cytokine receptor-like factor 3	chr11:79860001:79860982:-	1	79860039-79860108
52615	Suz12	polycomb protein Suz12 isoform 1	chr11:79845692:79847624:+	4	79846073-79846109,79846583-79846621,79846921-79846956,79845768-79845806
211255	Kbtbd7	kelch repeat and BTB (POZ) domain containing 7	chr14:79828609:79830843:+	3	79828838-79828896,79829983-79830022,79829909-79829978
18591	Pdgfb	platelet-derived growth factor subunit B	chr15:79826306:79827687:-	2	79827622-79827664,79827009-79827067
20720	Serpine2	glia-derived nexin precursor	chr1:79790899:79791579:-	4	79791100-79791216,79791232-79791326,79790902-79791000,79791373-79791476
268566	Gphn	gephyrin isoform 2	chr12:79784898:79785725:+	1	79785123-79785179
69163	Mrpl44	39S ribosomal protein L44, mitochondrial	chr1:79777713:79778020:+	1	79777872-79777908
78514	Arhgap10	rho GTPase-activating protein 10	chr8:79774265:79774817:-	1	79774283-79774345
110784	Nr3c2	mineralocorticoid receptor	chr8:79766429:79767538:+	1	79767464-79767513
68659	Fam198b	protein ENED	chr3:79745424:79750199:+	1	79750021-79750058
216987	Utp6	U3 small nucleolar RNA-associated protein 6	chr11:79747458:79749456:-	3	79749314-79749376,79748259-79748314,79749101-79749159
66897	Naa16	N-alpha-acetyltransferase 16, NatA auxiliary	chr14:79734314:79735540:-	1	79734911-79734966
260409	Cdc42ep3	cdc42 effector protein 3	chr17:79733365:79734064:-	1	79733367-79733423
69368	Wdfy1	WD repeat and FYVE domain containing 1 isoform	chr1:79698837:79702085:-	2	79701120-79701162,79700959-79701037
494448	Cbx6	chromobox protein homolog 6	chr15:79654328:79658409:-	3	79656619-79656689,79654349-79654384,79657649-79657697
12696	Cirbp	cold-inducible RNA-binding protein	chr10:79633743:79634398:+	1	79633786-79633890
59090	Midn	midnolin	chr10:79619387:79621112:+	3	79620868-79620918,79620505-79620618,79619633-79619684
69981	Tmem30a	cell cycle control protein 50A	chr9:79616751:79619092:-	9	79617519-79617638,79617807-79617868,79617664-79617747,79618662-79618766,79618980-79619033,79618565-79618623,79618316-79618376,79618791-79618871,79616749-79616847
223697	Sun2	SUN domain-containing protein 2	chr15:79554500:79555876:-	6	79555225-79555283,79554766-79554842,79554679-79554732,79554865-79554904,79555315-79555370,79554552-79554656
14904	Gtpbp1	GTP-binding protein 1	chr15:79550529:79551909:+	4	79550887-79550939,79551778-79551821,79550798-79550860,79550941-79551013
70599	Ssfa2	sperm-specific antigen 2 homolog	chr2:79511916:79513121:+	4	79512298-79512345,79512162-79512219,79512475-79512515,79512571-79512626
74158	Josd1	Josephin-1	chr15:79504680:79506509:-	1	79504722-79504757
12798	Cnn2	calponin-2	chr10:79457359:79458145:+	1	79457416-79457456
12816	Col12a1	Mus musculus 0 day neonate skin cDNA, RIKEN full-length enriched library, clone:4632409D22 product:procollagen, type XII, alpha 1, full insert sequence.	chr9:79446798:79448975:-	1	79448585-79448641
67738	Ppid	peptidyl-prolyl cis-trans isomerase D	chr3:79407041:79407572:+	2	79407097-79407166,79407280-79407324
18015	Nf1	Mus musculus 13 days embryo lung cDNA, RIKEN full-length enriched library, clone:D430030F20 product:neurofibromatosis 1, full insert sequence.	chr11:79391898:79395111:+	2	79394268-79394306,79394788-79394825
109284	C030046I01Rik	R3H domain-containing protein C19orf22 homolog	chr10:79372798:79373783:-	6	79372935-79372999,79373304-79373358,79373135-79373202,79373014-79373103,79373212-79373268,79372815-79372914
67040	Ddx17	probable ATP-dependent RNA helicase DDX17	chr15:79358126:79360441:-	3	79358480-79358570,79358817-79358882,79358923-79358988
216154	AK181029	Mus musculus cDNA, clone:Y0G0116L02, strand:minus, reference:ENSEMBL:Mouse-Transcript-ENST:ENSMUST00000045844, based on BLAT search.	chr10:79357452:79358028:-	1	79357469-79357514
22601	Yap1	yorkie homolog isoform 1	chr9:7932001:7934496:-	4	7932974-7933032,7932906-7932965,7933806-7933900,7933728-7933805
19205	Ptbp1	polypyrimidine tract-binding protein 1 isoform	chr10:79326022:79327178:+	1	79326634-79326674
225131	Wac	WW domain-containing adapter protein with	chr18:7926137:7929025:+	2	7928785-7928821,7928133-7928194
19106	Eif2ak2	interferon-induced, double-stranded	chr17:79251890:79254478:-	1	79252145-79252192
223693	Tmem184b	transmembrane protein 184B	chr15:79191114:79193073:-	1	79191218-79191267
16401	Integrin Alpha-4	Mus musculus adult male aorta and vein cDNA, RIKEN full-length enriched library, clone:A530082M10 product:integrin alpha 4, full insert sequence.	chr2:79166772:79173271:+	3	79168603-79168650,79173181-79173216,79168311-79168382
216150	Cdc34	ubiquitin-conjugating enzyme E2 R1	chr10:79150804:79151143:+	1	79150934-79150975
268980	Strn	striatin	chr17:79053304:79054829:-	1	79053428-79053474
240427	Setbp1	SET-binding protein	chr18:78947119:78951953:-	1	78951225-78951283
246048	Chodl	chondrolectin precursor	chr16:78950686:78951973:+	1	78951217-78951262
76089	Rapgef2	rap guanine nucleotide exchange factor 2	chr3:78866451:78868457:-	1	78867592-78867636
14958	H1f0	histone H1.0	chr15:78859736:78860930:+	3	78860857-78860911,78860468-78860559,78860682-78860799
16859	Lgals9	galectin-9 isoform 1	chr11:78776481:78776896:-	1	78776587-78776645
22193	Ube2e3	ubiquitin-conjugating enzyme E2 E3	chr2:78760212:78760740:+	4	78760447-78760496,78760376-78760439,78760293-78760338,78760531-78760599
74205	Acsl3	long-chain-fatty-acid--CoA ligase 3 isoform a	chr1:78702990:78704317:+	3	78703285-78703366,78703437-78703535,78703187-78703226
104445	Cdc42ep1	cdc42 effector protein 1	chr15:78680361:78681332:+	1	78680822-78680869
67102	D16Ertd472e	protein EURL homolog	chr16:78540583:78545362:-	2	78543076-78543121,78543000-78543035
23874	Farsb	phenylalanyl-tRNA synthetase beta chain	chr1:78421411:78421768:-	1	78421725-78421783
18099	Nlk	serine/threonine-protein kinase NLK	chr11:78380670:78382422:-	3	78380853-78380909,78381761-78381820,78381420-78381469
21927	Tnfaip1	BTB/POZ domain-containing adapter for	chr11:78336352:78338806:-	2	78337968-78338028,78337406-78337442
19201	Pstpip2	SubName: Full=Putative uncharacterized protein;	chr18:78120541:78121618:+	1	78120612-78120647
17187	Max	Mus musculus 7 days neonate cerebellum cDNA, RIKEN full-length enriched library, clone:A730011M08 product:Max protein, full insert sequence.	chr12:78038256:78039554:-	1	78038362-78038418
19293	Pvalb	parvalbumin alpha	chr15:78021548:78022095:-	4	78021546-78021607,78021984-78022110,78021858-78021983,78021781-78021856
11946	Atp5a1	ATP synthase subunit alpha, mitochondrial	chr18:78021121:78021607:+	4	78021368-78021487,78021493-78021603,78021140-78021255,78021256-78021352
71929	Tmem123	Mus musculus adult male tongue cDNA, RIKEN full-length enriched library, clone:2310075C12 product:weakly similar to PORIMIN [Homo sapiens], full insert sequence.	chr9:7792195:7794332:+	2	7793736-7793790,7793025-7793077
71538	Fbxo9	F-box only protein 9 isoform 1	chr9:77929306:77929786:-	1	77929513-77929621
216134	Pdxk	pyridoxal kinase	chr10:77899492:77903545:-	4	77903467-77903524,77899530-77899635,77903004-77903045,77903114-77903199
14252	Flot2	Mus musculus adult male lung cDNA, RIKEN full-length enriched library, clone:1200003P16 product:flotillin 2, full insert sequence.	chr11:77872735:77873934:+	4	77873517-77873572,77872934-77873007,77873058-77873164,77873197-77873257
212163	8030462N17Rik	hypothetical protein LOC212163	chr18:77872020:77873877:-	5	77872294-77872372,77872672-77872726,77873761-77873837,77873472-77873546,77873047-77873102
268448	Phf12	SubName: Full=Putative uncharacterized protein;	chr11:77843153:77844035:+	2	77843820-77843935,77843744-77843791
56551	Txn2	thioredoxin, mitochondrial precursor	chr15:77745481:77746173:-	4	77745833-77745896,77745756-77745811,77745525-77745609,77745611-77745672
28169	Agpat3	1-acyl-sn-glycerol-3-phosphate acyltransferase	chr10:77734308:77736431:-	3	77735418-77735461,77734675-77734750,77735762-77735812
19712	Rest	RE1-silencing transcription factor	chr5:77712009:77712722:+	2	77712301-77712349,77712140-77712180
216131	Trappc10	Mus musculus adult male corpora quadrigemina cDNA, RIKEN full-length enriched library, clone:B230307C21 product:similar to EPILEPSY HOLOPROSENCEPHALY CANDIDATE-1 PROTEIN (EHOC-1) (TRANSMEMBRANE PROTEIN 1) (GT334 PROTEIN) [Homo sapiens], full insert sequence.	chr10:77649471:77650600:-	1	77649553-77649615
28295	D10Jhu81e	ES1 protein homolog, mitochondrial precursor	chr10:77624812:77625334:-	1	77624920-77624974
15368	Hmox1	heme oxygenase 1	chr8:77623918:77624491:+	2	77624333-77624378,77623927-77623984
17886	Myh9	myosin-9 isoform 1	chr15:77591019:77592328:-	2	77591377-77591427,77591272-77591370
70823	Hmgxb4	HMG domain-containing protein 4	chr8:77553932:77555871:+	1	77553960-77554010
68564	Nufip2	nuclear fragile X mental retardation-interacting	chr11:77523237:77531468:+	15	77528068-77528138,77529396-77529459,77524634-77524686,77524534-77524609,77525524-77525622,77526424-77526500,77526232-77526278,77523967-77524026,77525217-77525332,77524093-77524166,77526046-77526108,77523771-77523842,77523912-77523960,77525689-77525735,77523849-77523907
15512	Hspa2	heat shock-related 70 kDa protein 2	chr12:77507422:77507923:+	1	77507496-77507548
244923	Klhl31	kelch-like protein 31	chr9:77503666:77507929:+	12	77505793-77505883,77506947-77507044,77507360-77507466,77506596-77506657,77507756-77507842,77506332-77506454,77505537-77505663,77505429-77505495,77506716-77506795,77506824-77506946,77507258-77507335,77507504-77507600
11819	Nr2f2	COUP transcription factor 2 isoform 1	chr7:77496836:77499542:-	2	77498361-77498436,77498593-77498640
268564	Zbtb1	zinc finger and BTB domain-containing protein 1	chr12:77488370:77489437:+	3	77488594-77488632,77488847-77488891,77488472-77488510
66661	Srp72	Mus musculus 8 days embryo whole body cDNA, RIKEN full-length enriched library, clone:5730412O15 product:signal recognition particle 72, full insert sequence.	chr5:77427394:77428960:+	6	77428221-77428281,77428369-77428476,77428495-77428563,77428841-77428878,77427850-77427949,77427702-77427811
328561	Apol10b	apolipoprotein L 10b	chr15:77414588:77415400:-	1	77415290-77415331
67054	Paics	multifunctional protein ADE2	chr5:77395839:77396531:+	1	77396151-77396219
17344	Pias2	E3 SUMO-protein ligase PIAS2 isoform 4	chr18:77391436:77394447:+	5	77393596-77393648,77393444-77393499,77393009-77393074,77392111-77392185,77392822-77392877
216965	Taok1	serine/threonine-protein kinase TAO1	chr11:77342664:77351368:-	35	77348264-77348306,77349877-77349941,77349607-77349697,77351072-77351188,77345526-77345582,77347076-77347159,77349755-77349865,77344182-77344240,77346083-77346148,77344052-77344111,77350709-77350747,77350060-77350118,77348024-77348102,77348410-77348515,77343644-77343699,77343777-77343828,77346153-77346211,77345253-77345376,77345453-77345497,77342706-77342802,77346476-77346564,77346988-77347048,773…
231326	AASDH	Mus musculus AASDH mRNA for 2-aminoadipic 6-semialdehyde dehydrogenase, complete cds.	chr5:77304963:77305048:-	1	77305016-77305055
241494	Zfp385b	zinc finger protein 385B isoform 3	chr2:77248689:77249981:-	3	77248883-77248944,77249671-77249728,77249870-77249912
66191	Ier3ip1	immediate early response 3-interacting protein	chr18:77179307:77180344:+	3	77180278-77180326,77180001-77180076,77180110-77180220
30940	Usp25	ubiquitin carboxyl-terminal hydrolase 25	chr16:77115807:77117025:+	6	77116472-77116552,77116197-77116291,77116841-77116885,77116419-77116458,77116292-77116417,77115839-77115896
22213	Ube2g2	ubiquitin-conjugating enzyme E2 G2	chr10:77107304:77108735:+	2	77108000-77108047,77107462-77107528
20610	Sumo3	small ubiquitin-related modifier 3 precursor	chr10:77079003:77081076:+	3	77079921-77079979,77080018-77080139,77079205-77079241
108705	Pttg1ip	pituitary tumor-transforming gene 1	chr10:77059810:77061477:+	1	77059959-77060016
93686	Rbfox2	RNA-binding protein 9 isoform 4	chr15:76909420:76914591:-	11	76912564-76912599,76910138-76910207,76911455-76911490,76910932-76911019,76911620-76911730,76910847-76910921,76909719-76909756,76912360-76912405,76914260-76914380,76914127-76914237,76912816-76912910
21807	mKIAA1994	Mus musculus mRNA for mKIAA1994 protein.	chr14:76906481:76907568:+	4	76907111-76907201,76907416-76907530,76907205-76907264,76907285-76907390
237859	Ccdc55	coiled-coil domain-containing protein 55	chr11:76857794:76859241:-	1	76858528-76858629
17189	Mb	myoglobin	chr15:76845919:76846355:-	3	76846073-76846133,76846138-76846256,76846257-76846379
81535	Sgpp1	sphingosine-1-phosphate phosphatase 1	chr12:76815235:76817099:-	5	76815715-76815793,76816492-76816535,76816056-76816143,76815289-76815364,76816871-76816908
104184	Blmh	bleomycin hydrolase	chr11:76800129:76800878:+	1	76800398-76800473
71591	AK018584	Mus musculus adult male cecum cDNA, RIKEN full-length enriched library, clone:9130001M19 product:unclassifiable, full insert sequence.	chr15:76682574:76683422:-	1	76683293-76683348
12753	Clock	circadian locomoter output cycles protein kaput	chr5:76641202:76645723:-	9	76642807-76642872,76642512-76642569,76643329-76643394,76641794-76641849,76641565-76641625,76641300-76641342,76644936-76645008,76643878-76643919,76643934-76643975
225845	Pla2g16	group XVI phospholipase A2	chr19:7660156:7663035:+	3	7662983-7663030,7662791-7662841,7660713-7660756
12874	Cpd	carboxypeptidase D precursor	chr11:76590710:76595685:-	9	76594242-76594297,76592637-76592694,76592919-76593017,76594039-76594099,76593216-76593318,76593610-76593660,76592073-76592117,76591942-76592037,76593882-76593939
26932	Ppp2r5e	serine/threonine-protein phosphatase 2A 56 kDa	chr12:76551868:76554700:-	8	76552488-76552546,76553222-76553320,76551977-76552080,76552553-76552613,76554407-76554450,76553007-76553044,76554219-76554272,76554611-76554689
223664	Lrrc14	leucine-rich repeat-containing protein 14	chr15:76545077:76545521:+	1	76545223-76545312
53334	Gosr1	Golgi SNAP receptor complex member 1	chr11:76540104:76543610:-	2	76543099-76543162,76541596-76541636
22138	Ttn	SubName: Full=Ttn protein; Flags: Fragment;	chr2:76542041:76543087:-	4	76542376-76542462,76542260-76542344,76543060-76543123,76542053-76542172
83435	Plekha3	pleckstrin homology domain-containing family A	chr2:76533559:76535392:+	1	76534469-76534510
67467	1200011I18Rik	hypothetical protein LOC67467	chr14:76486039:76490334:-	1	76486268-76486303
17126	Smad2	mothers against decapentaplegic homolog 2	chr18:76464384:76465385:+	1	76464385-76464455
99031	mKIAA4128	Mus musculus 16 days neonate thymus cDNA, RIKEN full-length enriched library, clone:A130038P17 product:OSBP-RELATED PROTEIN 6 homolog [Homo sapiens], full insert sequence.	chr2:76434039:76438704:+	13	76436670-76436705,76437365-76437442,76434807-76434882,76435779-76435887,76437079-76437142,76434402-76434443,76437159-76437231,76434458-76434522,76435515-76435580,76436400-76436458,76435596-76435653,76434605-76434682,76437467-76437562
68652	Tab2	TGF-beta-activated kinase 1 and MAP3K7-binding	chr10:7625446:7627232:-	9	7626213-7626263,7626521-7626646,7626402-7626501,7625665-7625738,7626659-7626769,7625451-7625544,7626044-7626110,7625562-7625616,7626861-7626957
109934	Abr	active breakpoint cluster region-related protein	chr11:76230236:76232605:-	1	76230254-76230313
56322	Timm22	mitochondrial import inner membrane translocase	chr11:76227624:76229794:+	4	76228915-76228964,76229154-76229205,76228061-76228102,76228852-76228893
77041	Arsk	arylsulfatase K	chr13:76197870:76199703:-	1	76198716-76198767
12833	Col6a1	collagen alpha-1(VI) chain precursor	chr10:76171537:76172303:-	3	76171739-76171774,76171988-76172049,76171618-76171677
109168	Atl3	atlastin-3 isoform 1	chr19:7608526:7613098:+	2	7611317-7611353,7612148-7612183
338337	Cog3	conserved oligomeric Golgi complex subunit 3	chr14:76102158:76103837:-	3	76102485-76102520,76102270-76102307,76102372-76102411
66168	Grina	glutamate [NMDA] receptor-associated protein 1	chr15:76079796:76080334:+	1	76080123-76080164
18230	Nxn	nucleoredoxin	chr11:76070728:76072066:-	1	76071475-76071524
73296	mKIAA0878	Mus musculus adult male testis cDNA, RIKEN full-length enriched library, clone:1700040C17 product:hypothetical BTB/POZ domain/Prenyl group binding site (CAAX box) containing protein, full insert sequence.	chr13:76006985:76009793:-	2	76007025-76007084,76007287-76007398
18810	Plec	plectin isoform 1a	chr15:76001405:76002599:-	3	76001911-76001966,76002368-76002429,76001767-76001874
240168	Rasgrp3	RAS, guanyl releasing protein 3	chr17:75926191:75928384:+	2	75926534-75926637,75926378-75926436
216119	Ybey	putative metalloprotease C21orf57 homolog	chr10:75922312:75925977:-	1	75925055-75925101
192657	Ell2	RNA polymerase II elongation factor ELL2	chr13:75908244:75909806:+	7	75909553-75909609,75909000-75909041,75909622-75909667,75909189-75909259,75909277-75909334,75909081-75909119,75908596-75908636
67959	Puf60	poly(U)-binding-splicing factor PUF60 isoform c	chr15:75900614:75900757:-	1	75900658-75900694
66412	Arrdc4	arrestin domain containing 4 isoform 1	chr7:75881880:75884362:-	1	75882495-75882545
18541	Pcnt	SubName: Full=Putative uncharacterized protein; Flags: Fragment;	chr10:75813999:75814483:-	1	75814043-75814092
228061	Agps	alkyldihydroxyacetonephosphate synthase,	chr2:75764100:75767706:+	11	75764927-75764987,75764188-75764227,75767520-75767576,75766439-75766519,75766633-75766690,75766011-75766109,75764407-75764495,75764686-75764794,75766760-75766867,75764496-75764537,75766237-75766294
110920	Hspa13	heat shock 70 kDa protein 13 precursor	chr16:75755438:75758693:-	1	75756703-75756742
66656	Eef1d	elongation factor 1-delta isoform a	chr15:75725230:75725982:-	1	75725769-75725805
18595	Pdgfra	alpha-type platelet-derived growth factor	chr5:75591125:75594229:+	2	75593888-75593933,75591492-75591542
22627	Ywhae	14-3-3 protein epsilon	chr11:75578174:75579341:+	7	75578377-75578432,75578775-75578820,75578927-75579034,75579188-75579233,75578825-75578925,75578457-75578505,75578654-75578774
[truncated: 2,979 more rows]

## Sheet: CELF1 c2c12
#Gene	Symbol	Description	Exons	NumClusters	Coords
[truncated: 1,137 more rows]

## Sheet: MBNL1 c2c12
#Gene	Symbol	Description	Exons	NumClusters	Coords
[truncated: 2,605 more rows]
