# Supplementary material for: Antagonistic regulation of mRNA expression and splicing by CELF and MBNL proteins
Source: Genome Res. 2015 Jun;25(6):858–71. doi: 10.1101/gr.184390.114 (PMC4448682; doi:10.1101/gr.184390.114)
Supplement: Supplemental Material [file supp_gr.184390.114_Table_S8.xlsx]

## Sheet: mbnlAndCelfBinding.GO.deltas.xl
Table S8. Gene Ontology categories for genes with 3' UTR CELF1 binding in muscle and 3' UTR MBNL1 binding in C2C12 myoblasts.
#Category	Group	No. in control genes (out of 2954)	No. in CLIPped genes (out of 1477)	Frequency in control genes	Frequency in CLIPped genes	Delta Frequency	Median p value	Bayes Factor
nitric-oxide synthase binding	molecular_function	0	6	0	0.00406229	0.00406229	0.00136247	inf
SH3/SH2 adaptor activity	molecular_function	0.12	6	4.06229e-05	0.00406229	0.00402167	0.00136247	inf
protein binding	molecular_function	607.8	437.12	0.205755	0.295951	0.0901963	4.91521e-10	7.96234e+306
regulation of neuron differentiation	biological_process	0.85	7	0.000287745	0.00473934	0.00445159	0.00256992	1.37362e+287
mesoderm formation	biological_process	2.53	10	0.000856466	0.00677048	0.00591401	0.000534881	1.03533e+234
patterning of blood vessels	biological_process	2.54	10	0.000859851	0.00677048	0.00591063	0.000534881	5.22636e+217
actin cytoskeleton organization	biological_process	18.92	32	0.00640487	0.0216655	0.0152607	1.74085e-05	1.51848e+216
positive regulation of transcription, DNA-dependent	biological_process	77.96	82	0.0263913	0.0555179	0.0291266	1.96253e-06	6.13401e+194
plasma membrane	cellular_component	308.34	251.45	0.104381	0.170244	0.0658632	9.15358e-10	5.55744e+191
collagen binding	molecular_function	2.94	9	0.000995261	0.00609343	0.00509817	0.00381195	1.32403e+186
cytoplasm	cellular_component	988.84	600.57	0.334746	0.406615	0.0718687	1.97461e-06	9.3705e+150
negative regulation of insulin secretion	biological_process	0.9	6	0.000304672	0.00406229	0.00375762	0.00681974	2.28095e+144
E-box binding	molecular_function	1.36	6	0.000460393	0.00406229	0.0036019	0.00681974	9.53047e+143
MAP kinase activity	molecular_function	1.45	6	0.00049086	0.00406229	0.00357143	0.00681974	2.08768e+141
positive regulation of transcription from RNA polymerase II promoter	biological_process	102.77	97	0.0347901	0.0656737	0.0308835	7.14914e-06	1.10082e+139
intercalated disc	cellular_component	5.22	10	0.0017671	0.00677048	0.00500339	0.0106629	3.54565e+125
negative regulation of Ras protein signal transduction	biological_process	2.61	8	0.000883548	0.00541638	0.00453284	0.0087493	1.46823e+115
developmental growth	biological_process	2.48	9	0.00083954	0.00609343	0.00525389	0.00135415	3.15679e+107
SH3 domain binding	molecular_function	13.68	22	0.00463101	0.0148951	0.010264	0.00102655	5.24646e+106
ventricular septum development	biological_process	0.82	5	0.00027759	0.00338524	0.00310765	0.0177677	5.36137e+103
peptidyl-threonine phosphorylation	biological_process	4.99	11	0.00168923	0.00744753	0.00575829	0.0054812	3.91371e+100
chondrocyte differentiation	biological_process	1.59	6	0.000538253	0.00406229	0.00352404	0.0195692	8.68374e+96
embryonic limb morphogenesis	biological_process	3.7	9	0.00125254	0.00609343	0.00484089	0.013829	8.3834e+96
membrane protein ectodomain proteolysis	biological_process	1.27	5	0.000429926	0.00338524	0.00295531	0.0177677	5.76354e+95
G-protein coupled receptor binding	molecular_function	1.75	7	0.000592417	0.00473934	0.00414692	0.00822354	4.24417e+92
neuron projection	cellular_component	35.96	40	0.0121733	0.0270819	0.0149086	0.000515978	1.62756e+92
ubiquitin protein ligase binding	molecular_function	27.83	34	0.00942112	0.0230196	0.0135985	0.000568674	6.99636e+90
sequence-specific DNA binding transcription factor activity	molecular_function	85.41	79	0.0289133	0.0534868	0.0245735	9.61472e-05	1.36284e+85
actin binding	molecular_function	43.44	47.49	0.0147055	0.032153	0.0174475	0.000191434	3.42921e+83
apical plasma membrane	cellular_component	19.55	28.62	0.00661814	0.0193771	0.012759	0.000227835	5.84425e+82
focal adhesion	cellular_component	16.83	22	0.00569736	0.0148951	0.0091977	0.0032893	2.47932e+82
endoderm development	biological_process	2.67	8	0.000903859	0.00541638	0.00451253	0.0087493	2.03086e+82
positive regulation of cell cycle	biological_process	3.85	9	0.00130332	0.00609343	0.00479012	0.013829	1.48658e+82
cortical cytoskeleton	cellular_component	2.88	7	0.000974949	0.00473934	0.00376439	0.0195461	5.50499e+81
protein stabilization	biological_process	11	16	0.00372376	0.0108328	0.007109	0.00667839	2.38645e+80
tricarboxylic acid cycle	biological_process	6.96	12	0.00235613	0.00812458	0.00576845	0.0119831	1.10015e+79
membrane	cellular_component	742.84	458	0.251469	0.310088	0.0586188	3.69946e-05	2.78309e+78
protein dimerization activity	molecular_function	16.46	23	0.00557211	0.0155721	0.01	0.0010258	6.57406e+77
actin cytoskeleton	cellular_component	23.39	29	0.00791808	0.0196344	0.0117163	0.00175865	1.40619e+77
SMAD binding	molecular_function	9.76	15	0.00330399	0.0101557	0.00685173	0.00891606	1.45046e+72
sequence-specific DNA binding	molecular_function	58.96	57	0.0199594	0.0385917	0.0186324	0.000479125	5.35549e+69
positive regulation of cell proliferation	biological_process	44.25	46	0.0149797	0.0311442	0.0161645	0.000610205	5.25625e+69
membrane raft	cellular_component	19.4	25	0.00656737	0.0169262	0.0103588	0.00184818	1.6165e+65
inner ear morphogenesis	biological_process	3.06	8	0.00103588	0.00541638	0.0043805	0.0087493	1.49165e+65
transcription factor complex	cellular_component	36.1	39	0.0122207	0.0264049	0.0141842	0.000787492	1.2996e+65
protein heterooligomerization	biological_process	14.37	17	0.00486459	0.0115098	0.00664523	0.0199038	2.72077e+64
sarcolemma	cellular_component	11.59	17.56	0.00392349	0.011889	0.00796547	0.00301177	2.37571e+62
neuron projection development	biological_process	12.89	18	0.00436357	0.0121869	0.00782329	0.00628101	3.13827e+60
adherens junction	cellular_component	2.21	6	0.000748138	0.00406229	0.00331415	0.0195692	2.64417e+60
lung alveolus development	biological_process	2.87	6	0.000971564	0.00406229	0.00309072	0.0681672	6.07479e+59
hippocampus development	biological_process	2.52	7	0.000853081	0.00473934	0.00388626	0.00822354	1.40316e+59
mammary gland development	biological_process	3.66	8	0.001239	0.00541638	0.00417739	0.0175117	3.82203e+58
caveola	cellular_component	11.9	16	0.00402844	0.0108328	0.00680433	0.0139462	1.94822e+57
insulin receptor binding	molecular_function	3.06	8	0.00103588	0.00541638	0.0043805	0.0087493	2.01499e+56
cellular response to UV	biological_process	3.5	9	0.00118483	0.00609343	0.0049086	0.00381195	1.36378e+56
protein kinase binding	molecular_function	60.62	53	0.0205213	0.0358835	0.0153622	0.00337191	5.0646e+55
endoplasmic reticulum-Golgi intermediate compartment	cellular_component	8.05	12	0.00272512	0.00812458	0.00539946	0.016055	3.28348e+55
regulation of transcription, DNA-dependent	biological_process	307.95	207	0.104248	0.140149	0.0359005	0.000401468	3.09578e+55
R-SMAD binding	molecular_function	3.09	8	0.00104604	0.00541638	0.00437035	0.0087493	1.79054e+55
transcription regulatory region DNA binding	molecular_function	21.68	26	0.0073392	0.0176032	0.010264	0.00311058	7.98481e+54
glycoprotein binding	molecular_function	5.67	11	0.00191943	0.00744753	0.0055281	0.00890133	2.71633e+54
positive regulation of peptidyl-serine phosphorylation	biological_process	8.29	12	0.00280636	0.00812458	0.00531821	0.016055	2.27521e+54
microtubule-based movement	biological_process	7.33	10	0.00248138	0.00677048	0.0042891	0.0754127	7.69078e+52
protein complex binding	molecular_function	50.68	46	0.0171564	0.0311442	0.0139878	0.00436801	7.42819e+52
protein domain specific binding	molecular_function	42.4	42	0.0143534	0.028436	0.0140826	0.0015033	2.12794e+52
peptidyl-serine phosphorylation	biological_process	13.25	16	0.00448544	0.0108328	0.00634733	0.0167645	2.05276e+52
cytosol	cellular_component	176.32	129.07	0.0596886	0.0873866	0.027698	0.000849949	6.63834e+51
visual learning	biological_process	1.7	5	0.000575491	0.00338524	0.00280975	0.0451374	2.62457e+50
protein ubiquitination involved in ubiquitin-dependent protein catabolic process	biological_process	9.35	13	0.0031652	0.00880162	0.00563643	0.0206173	1.73571e+50
negative regulation of transcription from RNA polymerase II promoter	biological_process	83.39	75	0.0282295	0.0507786	0.0225491	0.000301878	2.49734e+49
protein serine/threonine kinase activity	molecular_function	68.11	59	0.0230569	0.0399458	0.016889	0.00256801	1.24812e+47
response to drug	biological_process	16.04	18	0.00542993	0.0121869	0.00675694	0.0178091	6.92673e+46
ubiquitin-protein ligase activity	molecular_function	48.74	45	0.0164997	0.0304672	0.0139675	0.00316511	2.0517e+46
insulin receptor signaling pathway	biological_process	8.23	12	0.00278605	0.00812458	0.00533852	0.016055	9.41814e+45
hippo signaling cascade	biological_process	2.64	6	0.000893703	0.00406229	0.00316858	0.0438682	3.17187e+45
DNA binding	molecular_function	259.56	170	0.0878673	0.115098	0.0272309	0.00506768	2.77438e+42
integral to plasma membrane	cellular_component	23.42	27	0.00792823	0.0182803	0.0103521	0.00388645	6.60205e+41
Wnt receptor signaling pathway	biological_process	28.28	28	0.00957346	0.0189573	0.00938389	0.00991407	5.3952e+41
positive regulation of stress fiber assembly	biological_process	3.24	7	0.00109682	0.00473934	0.00364252	0.0195461	4.91625e+41
Hsp70 protein binding	molecular_function	3.65	5	0.00123561	0.00338524	0.00214963	0.170521	2.83053e+41
protein localization to nucleus	biological_process	3.64	8	0.00123223	0.00541638	0.00418416	0.026274	1.05885e+41
protein export from nucleus	biological_process	3.18	8	0.00107651	0.00541638	0.00433988	0.0087493	4.72548e+40
Rho GTPase binding	molecular_function	3.82	8	0.00129316	0.00541638	0.00412322	0.026274	1.8806e+40
vesicle	cellular_component	7.13	10	0.00241368	0.00677048	0.0043568	0.0365864	1.46591e+40
transcription, DNA-dependent	biological_process	306.28	202	0.103683	0.136764	0.0330806	0.00110886	1.4185e+40
zinc ion binding	molecular_function	159.91	115	0.0541334	0.0778605	0.0237271	0.00295752	6.29723e+39
cell-cell adhesion	biological_process	8.67	13	0.002935	0.00880162	0.00586662	0.0206173	1.23658e+38
protein K63-linked ubiquitination	biological_process	4.93	8	0.00166892	0.00541638	0.00374746	0.0395381	8.94562e+37
cytoskeleton	cellular_component	161.55	116.05	0.0546886	0.0785714	0.0238829	0.0024052	6.51214e+37
external side of plasma membrane	cellular_component	13.99	17	0.00473595	0.0115098	0.00677387	0.0199038	2.4899e+37
peptide binding	molecular_function	12.99	15	0.00439743	0.0101557	0.00575829	0.0271903	1.29372e+37
mitogen-activated protein kinase kinase kinase binding	molecular_function	4.31	8	0.00145904	0.00541638	0.00395735	0.026274	7.68997e+36
angiogenesis	biological_process	25.89	28	0.00876439	0.0189573	0.010193	0.00535033	1.20559e+36
in utero embryonic development	biological_process	42.16	39	0.0142722	0.0264049	0.0121327	0.00591685	5.01193e+35
vasculogenesis	biological_process	6.8	11	0.00230196	0.00744753	0.00514557	0.0209491	3.73103e+35
G-protein beta/gamma-subunit complex binding	molecular_function	1.65	5	0.000558565	0.00338524	0.00282668	0.0451374	3.6155e+35
SH2 domain binding	molecular_function	4.67	8	0.00158091	0.00541638	0.00383548	0.0395381	3.25084e+35
integral to membrane	cellular_component	422.73	266	0.143104	0.180095	0.0369905	0.00152065	2.00799e+35
kinesin binding	molecular_function	2.69	6	0.00091063	0.00406229	0.00315166	0.0681672	1.58786e+35
positive regulation of gene expression	biological_process	19.78	24	0.00669601	0.0162492	0.00955315	0.00365317	9.26721e+34
cell-cell adherens junction	cellular_component	7.18	10	0.0024306	0.00677048	0.00433988	0.0365864	8.738e+34
dendrite development	biological_process	2.61	7	0.000883548	0.00473934	0.00385579	0.00822354	6.69825e+34
transferase activity, transferring phosphorus-containing groups	molecular_function	80.27	64	0.0271733	0.0433311	0.0161578	0.00518852	6.03543e+34
double-stranded DNA binding	molecular_function	18.35	21	0.00621192	0.014218	0.00800609	0.00958491	2.29378e+34
signal transduction by phosphorylation	biological_process	4.24	8	0.00143534	0.00541638	0.00398104	0.026274	1.85207e+34
protein serine/threonine phosphatase activity	molecular_function	7.21	10	0.00244076	0.00677048	0.00432972	0.0365864	1.74469e+34
G1/S transition of mitotic cell cycle	biological_process	7.07	11	0.00239336	0.00744753	0.00505416	0.0209491	6.35853e+33
positive regulation of neuron differentiation	biological_process	6.76	11	0.00228842	0.00744753	0.00515911	0.0209491	5.79033e+33
G2/M transition of mitotic cell cycle	biological_process	2.3	6	0.000778605	0.00406229	0.00328368	0.0195692	5.39875e+33
protein complex	cellular_component	85.94	69	0.0290928	0.0467163	0.0176236	0.00315231	2.25574e+32
cellular response to drug	biological_process	2.91	5	0.000985105	0.00338524	0.00240014	0.126646	1.92294e+32
cell adhesion	biological_process	44.38	42	0.0150237	0.028436	0.0134123	0.00387733	4.079e+31
transmembrane receptor protein serine/threonine kinase signaling pathway	biological_process	2.54	5	0.000859851	0.00338524	0.00252539	0.126646	3.2406e+31
negative regulation of neuron differentiation	biological_process	6.25	10	0.00211578	0.00677048	0.00465471	0.0172864	8.47962e+30
ER to Golgi vesicle-mediated transport	biological_process	8.72	11	0.00295193	0.00744753	0.0044956	0.0547041	4.15668e+30
transcription factor binding	molecular_function	52.2	45	0.017671	0.0304672	0.0127962	0.00857136	9.6927e+29
neuronal cell body	cellular_component	42.12	39	0.0142586	0.0264049	0.0121462	0.00591685	5.29761e+29
negative regulation of cell migration	biological_process	7.24	11	0.00245091	0.00744753	0.00499661	0.0209491	4.39334e+29
negative regulation of microtubule depolymerization	biological_process	2.05	5	0.000693974	0.00338524	0.00269127	0.0451374	1.48479e+29
phosphatidylinositol 3-kinase binding	molecular_function	3.63	8	0.00122884	0.00541638	0.00418754	0.0175117	1.01693e+29
proximal/distal pattern formation	biological_process	2.18	5	0.000737982	0.00338524	0.00264726	0.0451374	7.37719e+28
JAK-STAT cascade	biological_process	3.34	6	0.00113067	0.00406229	0.00293162	0.0681672	3.9068e+28
gastrulation with mouth forming second	biological_process	3.23	6	0.00109343	0.00406229	0.00296886	0.0681672	2.26207e+28
hemopoiesis	biological_process	7.29	11	0.00246784	0.00744753	0.00497969	0.0209491	2.094e+28
perinuclear region of cytoplasm	cellular_component	76.76	57	0.0259851	0.0385917	0.0126066	0.025304	1.14542e+28
canonical Wnt receptor signaling pathway	biological_process	8.74	12	0.0029587	0.00812458	0.00516588	0.0336149	9.32386e+27
embryonic cranial skeleton morphogenesis	biological_process	3.31	6	0.00112051	0.00406229	0.00294177	0.0681672	8.34312e+27
protein phosphorylation	biological_process	103.48	77	0.0350305	0.0521327	0.0171022	0.0058691	1.83283e+27
adult locomotory behavior	biological_process	3.83	7	0.00129655	0.00473934	0.00344279	0.0499299	9.84664e+26
transcription corepressor activity	molecular_function	24.37	22	0.00824983	0.0148951	0.00664523	0.0411182	6.38096e+26
neural tube closure	biological_process	10.12	13	0.00342586	0.00880162	0.00537576	0.0250248	1.56635e+26
positive regulation of epithelial to mesenchymal transition	biological_process	2.21	6	0.000748138	0.00406229	0.00331415	0.0195692	9.97883e+25
Hsp90 protein binding	molecular_function	1.9	5	0.000643196	0.00338524	0.00274204	0.0451374	6.98232e+25
beta-catenin binding	molecular_function	8.27	12	0.00279959	0.00812458	0.00532498	0.016055	2.56081e+25
regulation of transcription from RNA polymerase II promoter	biological_process	37.1	35	0.0125592	0.0236967	0.0111374	0.00771543	1.31219e+25
chromatin remodeling	biological_process	10.18	12	0.00344617	0.00812458	0.0046784	0.0415534	9.01309e+24
cartilage development	biological_process	6.28	10	0.00212593	0.00677048	0.00464455	0.0172864	7.39607e+24
structural molecule activity	molecular_function	12.91	15.56	0.00437035	0.0105349	0.00616452	0.0271903	3.58977e+24
cell cortex	cellular_component	14.55	17	0.00492552	0.0115098	0.00658429	0.022887	3.26042e+24
response to lipopolysaccharide	biological_process	9.85	11	0.00333446	0.00744753	0.00411307	0.101084	1.8717e+24
kinase activity	molecular_function	111.38	81.62	0.0377048	0.0552607	0.0175559	0.0101895	1.01632e+24
actin filament organization	biological_process	4.94	9	0.00167231	0.00609343	0.00442112	0.0206746	8.2392e+23
nucleus	cellular_component	995.77	558	0.337092	0.377793	0.0407007	0.0083284	7.89606e+23
negative regulation of canonical Wnt receptor signaling pathway	biological_process	9.48	13	0.00320921	0.00880162	0.00559242	0.0206173	7.17184e+23
enzyme binding	molecular_function	49.49	41	0.0167536	0.027759	0.0110054	0.0183931	5.62143e+23
kinase binding	molecular_function	8.23	11.07	0.00278605	0.00749492	0.00470887	0.0336149	5.46975e+23
negative regulation of transcription, DNA-dependent	biological_process	71.71	56	0.0242756	0.0379147	0.0136391	0.0132113	4.77682e+23
protein import into nucleus	biological_process	8.03	11	0.00271835	0.00744753	0.00472918	0.0284954	3.48322e+23
calmodulin binding	molecular_function	16.61	19	0.00562288	0.0128639	0.00724103	0.0195758	7.1837e+22
heat shock protein binding	molecular_function	9.43	11	0.00319228	0.00744753	0.00425525	0.0778938	5.72046e+22
embryo development	biological_process	12.94	15	0.0043805	0.0101557	0.00577522	0.0271903	5.30353e+22
positive regulation of MAPK cascade	biological_process	10.13	13	0.00342925	0.00880162	0.00537238	0.0250248	3.02897e+22
chromatin binding	molecular_function	58.69	51	0.019868	0.0345295	0.0146615	0.00375715	2.53559e+22
embryonic organ development	biological_process	2.32	5	0.000785376	0.00338524	0.00259986	0.0451374	1.88358e+21
fibroblast growth factor receptor signaling pathway	biological_process	2.74	5	0.000927556	0.00338524	0.00245768	0.126646	1.13886e+21
transforming growth factor beta receptor signaling pathway	biological_process	11.61	14	0.00393026	0.00947867	0.00554841	0.0195551	6.48441e+20
cytokine-mediated signaling pathway	biological_process	8.07	10	0.00273189	0.00677048	0.00403859	0.0754127	2.84779e+20
phosphorylation	biological_process	112.42	80.62	0.0380569	0.0545836	0.0165267	0.0156892	3.39032e+19
Golgi apparatus	cellular_component	183.41	122	0.0620887	0.0825999	0.0205112	0.0129432	6.04016e+18
protein polyubiquitination	biological_process	13.42	14	0.00454299	0.00947867	0.00493568	0.0705488	4.32307e+18
negative regulation of neuron projection development	biological_process	3.86	6	0.0013067	0.00406229	0.00275559	0.0935857	8.2492e+17
positive regulation of DNA replication	biological_process	7.12	8	0.00241029	0.00541638	0.00300609	0.107131	6.80149e+17
negative regulation of protein binding	biological_process	4.96	7	0.00167908	0.00473934	0.00306026	0.119906	3.2661e+17
cell junction	cellular_component	63.71	48	0.0215674	0.0324983	0.0109309	0.0330945	1.75468e+17
Rho protein signal transduction	biological_process	6.37	10	0.0021564	0.00677048	0.00461408	0.0365864	1.61978e+17
actin filament binding	molecular_function	9.27	10	0.00313812	0.00677048	0.00363236	0.0881514	6.10861e+16
stress fiber	cellular_component	7.52	11	0.0025457	0.00744753	0.00490183	0.0209491	5.0293e+16
intracellular protein transport	biological_process	40.5	35	0.0137102	0.0236967	0.00998646	0.0182827	4.95486e+16
negative regulation of apoptotic process	biological_process	83.32	62	0.0282058	0.041977	0.0137712	0.0178803	3.24285e+16
ion channel binding	molecular_function	9.71	13	0.00328707	0.00880162	0.00551456	0.022821	2.56249e+16
cell-cell junction	cellular_component	13.95	15	0.00472241	0.0101557	0.00543331	0.0465392	2.5359e+16
negative regulation of translation	biological_process	12.35	12	0.00418077	0.00812458	0.00394381	0.111856	2.33481e+16
transcription cofactor activity	molecular_function	7.27	10	0.00246107	0.00677048	0.00430941	0.0365864	1.65112e+16
cell differentiation	biological_process	69.28	54	0.0234529	0.0365606	0.0131077	0.0149711	1.01543e+16
regulation of protein phosphorylation	biological_process	5.82	8	0.00197021	0.00541638	0.00344617	0.0845541	4694305935720000
cell surface	cellular_component	42.67	35	0.0144448	0.0236967	0.00925186	0.0385935	2939055075790000
cytoplasmic vesicle	cellular_component	65.75	50	0.022258	0.0338524	0.0115944	0.0212372	1555433527490000
ephrin receptor binding	molecular_function	4.07	6	0.00137779	0.00406229	0.0026845	0.0935857	1342683689680000
Z disc	cellular_component	13.2	13.56	0.00446852	0.00918077	0.00471225	0.0666121	1124204789350000
negative regulation of transforming growth factor beta receptor signaling pathway	biological_process	6.82	10	0.00230873	0.00677048	0.00446175	0.0365864	435530823698000
cell periphery	cellular_component	3.67	6	0.00124238	0.00406229	0.00281991	0.0935857	321528383656000
glucose metabolic process	biological_process	10.5	11	0.0035545	0.00744753	0.00389303	0.101084	253171726124000
GDP binding	molecular_function	12.11	12	0.00409953	0.00812458	0.00402505	0.0867782	252137388782000
negative regulation of BMP signaling pathway	biological_process	4	6	0.0013541	0.00406229	0.00270819	0.0935857	245913820854000
cellular response to insulin stimulus	biological_process	7.14	9	0.00241706	0.00609343	0.00367637	0.0632298	170408893561000
positive regulation of smooth muscle cell proliferation	biological_process	6.95	9	0.00235274	0.00609343	0.00374069	0.0632298	145297940105000
cellular response to calcium ion	biological_process	2.88	5	0.000974949	0.00338524	0.00241029	0.126646	110868623024000
outflow tract morphogenesis	biological_process	3.34	6	0.00113067	0.00406229	0.00293162	0.0681672	44469174208400
positive regulation of pathway-restricted SMAD protein phosphorylation	biological_process	2.86	5	0.000968179	0.00338524	0.00241706	0.126646	29767547571300
protein targeting	biological_process	6.34	8	0.00214624	0.00541638	0.00327014	0.0845541	27169907013800
negative regulation of TOR signaling cascade	biological_process	4.88	7	0.001652	0.00473934	0.00308734	0.119906	26301500461000
RNA polymerase II core promoter proximal region sequence-specific DNA binding	molecular_function	4.59	7	0.00155383	0.00473934	0.00318551	0.119906	20809439411800
basolateral plasma membrane	cellular_component	16.84	17	0.00570074	0.0115098	0.00580907	0.044738	17906640302800
positive regulation of calcium ion transport	biological_process	3.79	5	0.00128301	0.00338524	0.00210223	0.170521	4371711578390
positive regulation of cell growth	biological_process	9.05	11	0.00306364	0.00744753	0.00438389	0.0547041	4227793809970
BMP signaling pathway	biological_process	5.59	8	0.00189235	0.00541638	0.00352404	0.0620461	1954294319870
middle ear morphogenesis	biological_process	3.17	5	0.00107312	0.00338524	0.00231212	0.126646	1692757349450
positive regulation of glucose import	biological_process	4.09	5	0.00138456	0.00338524	0.00200068	0.170521	1303720084370
cell-cell junction organization	biological_process	2.23	5	0.000754909	0.00338524	0.00263033	0.0451374	784448564425
spindle microtubule	cellular_component	5.67	7	0.00191943	0.00473934	0.00281991	0.141546	590051987033
cellular response to organic cyclic compound	biological_process	3.2	5	0.00108328	0.00338524	0.00230196	0.126646	371943601375
cell cycle arrest	biological_process	17.2	16	0.00582261	0.0108328	0.00501016	0.0932137	277666326004
GTP catabolic process	biological_process	34.33	26	0.0116215	0.0176032	0.00598172	0.0999381	226372229503
regulation of gene expression	biological_process	12.59	15	0.00426202	0.0101557	0.0058937	0.0271903	115946880435
gastrulation	biological_process	5.11	7	0.00172986	0.00473934	0.00300948	0.119906	111371855474
signal transducer activity	molecular_function	34.77	32	0.0117705	0.0216655	0.00989506	0.0179607	7.60088e+10
endosome	cellular_component	81.06	56	0.0274408	0.0379147	0.0104739	0.0652806	6.28856e+10
osteoblast differentiation	biological_process	4.9	7	0.00165877	0.00473934	0.00308057	0.119906	6.03187e+10
endoplasmic reticulum	cellular_component	188.65	117	0.0638626	0.0792146	0.0153521	0.0635314	4.95948e+10
chromosome, centromeric region	cellular_component	16.39	16	0.00554841	0.0108328	0.00528436	0.0583204	3.38125e+10
negative regulation of cell proliferation	biological_process	47.12	36	0.0159513	0.0243737	0.00842248	0.0520066	1.97054e+10
phosphoprotein phosphatase activity	molecular_function	23.61	20	0.00799255	0.013541	0.00554841	0.106905	1.82838e+10
protein kinase activity	molecular_function	89.36	63	0.0302505	0.042654	0.0124035	0.0353873	16613625421
response to endoplasmic reticulum stress	biological_process	4.4	6	0.00148951	0.00406229	0.00257278	0.0935857	16286067871
synaptic transmission	biological_process	5.33	7	0.00180433	0.00473934	0.002935	0.119906	1.17835e+10
small GTPase mediated signal transduction	biological_process	38.83	33	0.0131449	0.0223426	0.0091977	0.0313173	1.13897e+10
positive regulation of protein phosphorylation	biological_process	17.58	16	0.00595125	0.0108328	0.00488152	0.100555	1.0378e+10
estrogen receptor binding	molecular_function	6.05	8	0.00204807	0.00541638	0.00336831	0.0845541	7.94365e+09
neural crest cell migration	biological_process	2.22	5	0.000751523	0.00338524	0.00263372	0.0451374	6.93954e+09
RNA polymerase II distal enhancer sequence-specific DNA binding transcription factor activity	molecular_function	8.27	10	0.00279959	0.00677048	0.00397089	0.0754127	5.19355e+09
positive regulation of protein binding	biological_process	6.14	8	0.00207854	0.00541638	0.00333785	0.0845541	5.17487e+09
protein tyrosine phosphatase activity	molecular_function	13.83	13	0.00468179	0.00880162	0.00411984	0.105581	4.62063e+09
acrosomal vesicle	cellular_component	4.12	6	0.00139472	0.00406229	0.00266757	0.0935857	4.39158e+09
protein dephosphorylation	biological_process	23.54	20	0.00796886	0.013541	0.00557211	0.0739527	4.09619e+09
cell-matrix adhesion	biological_process	6.58	8	0.00222749	0.00541638	0.0031889	0.0845541	3.16074e+09
activation of MAPKK activity	biological_process	4.75	7	0.00160799	0.00473934	0.00313135	0.119906	1.91239e+09
NuRD complex	cellular_component	3.99	6	0.00135071	0.00406229	0.00271158	0.0935857	1.87855e+09
GTP binding	molecular_function	69.63	49	0.0235714	0.0331754	0.00960393	0.0756431	1.69713e+09
positive regulation of mitotic cell cycle	biological_process	4.21	6	0.00142519	0.00406229	0.0026371	0.0935857	1.2464e+09
signal transduction	biological_process	90.09	66	0.0304976	0.0446852	0.0141875	0.0192753	1.19794e+09
positive regulation of cell migration	biological_process	19.36	18	0.00655383	0.0121869	0.00563304	0.054243	9.18157e+08
androgen receptor binding	molecular_function	5.41	7	0.00183142	0.00473934	0.00290792	0.119906	6.73928e+08
histone acetyltransferase binding	molecular_function	3.4	5	0.00115098	0.00338524	0.00223426	0.126646	3.96875e+08
kidney development	biological_process	10.06	11	0.00340555	0.00744753	0.00404198	0.101084	1.92993e+08
cellular component movement	biological_process	4.47	6	0.0015132	0.00406229	0.00254909	0.0935857	1.37999e+08
regulation of cell migration	biological_process	7.77	9	0.00263033	0.00609343	0.0034631	0.118942	1.17188e+08
protein self-association	molecular_function	3.79	6	0.00128301	0.00406229	0.00277928	0.0935857	5.52104e+07
positive regulation of cell adhesion	biological_process	4.28	6	0.00144888	0.00406229	0.00261341	0.0935857	2.97544e+07
extracellular vesicular exosome	cellular_component	12.22	12	0.00413676	0.00812458	0.00398781	0.0867782	2.16842e+07
transcriptional repressor complex	cellular_component	9.01	10	0.0030501	0.00677048	0.00372038	0.0881514	2.13923e+07
cerebral cortex development	biological_process	4.99	7	0.00168923	0.00473934	0.0030501	0.119906	1.51596e+07
protein transport	biological_process	138.62	89	0.0469262	0.0602573	0.0133311	0.0655653	1.51511e+07
positive regulation of proteasomal ubiquitin-dependent protein catabolic process	biological_process	8.13	9	0.0027522	0.00609343	0.00334123	0.118942	1.44822e+07
histone deacetylase binding	molecular_function	12	12	0.00406229	0.00812458	0.00406229	0.0867782	7.09432e+06
positive regulation of insulin secretion	biological_process	2.46	5.62	0.000832769	0.00380501	0.00297224	0.0566523	4.34389e+06
circadian rhythm	biological_process	5.52	7	0.00186865	0.00473934	0.00287068	0.130726	3.87243e+06
nuclear chromatin	cellular_component	17.29	16	0.00585308	0.0108328	0.00497969	0.0932137	2.63092e+06
positive regulation of canonical Wnt receptor signaling pathway	biological_process	5.73	7	0.00193974	0.00473934	0.00279959	0.141546	2.09668e+06
neuromuscular junction	cellular_component	8.04	9.56	0.00272173	0.00647258	0.00375085	0.0754127	1.52102e+06
protein autophosphorylation	biological_process	24.86	22	0.00841571	0.0148951	0.00647935	0.0609372	1.50631e+06
apoptotic process	biological_process	99.45	66	0.0336662	0.0446852	0.011019	0.0767863	1.41884e+06
chloride transport	biological_process	4.37	5	0.00147935	0.00338524	0.00190589	0.170521	964512
cytoskeleton organization	biological_process	14.82	14	0.00501693	0.00947867	0.00446175	0.112145	870764
RNA polymerase II core promoter proximal region sequence-specific DNA binding transcription factor activity involved in positive regulation of transcription	molecular_function	8.76	10	0.00296547	0.00677048	0.00380501	0.0881514	856391
ruffle	cellular_component	13.57	13	0.00459377	0.00880162	0.00420785	0.105581	841644
lamellipodium	cellular_component	22.44	19	0.00759648	0.0128639	0.00526743	0.0948252	792943
fibroblast growth factor binding	molecular_function	3.35	5	0.00113406	0.00338524	0.00225118	0.126646	520265
repressing transcription factor binding	molecular_function	3.6	5	0.00121869	0.00338524	0.00216655	0.170521	464535
nervous system development	biological_process	37.04	31	0.0125389	0.0209885	0.00844956	0.0265404	381060
forebrain development	biological_process	7.85	10	0.00265741	0.00677048	0.00411307	0.0754127	375792
branching involved in ureteric bud morphogenesis	biological_process	4.78	7	0.00161814	0.00473934	0.00312119	0.119906	348030
non-membrane spanning protein tyrosine kinase activity	molecular_function	5.04	7	0.00170616	0.00473934	0.00303318	0.119906	280288
calcium ion binding	molecular_function	58.59	41	0.0198341	0.027759	0.00792485	0.096672	258771
blood vessel morphogenesis	biological_process	2.77	5	0.000937712	0.00338524	0.00244753	0.126646	173289
signalosome	cellular_component	8.89	9	0.00300948	0.00609343	0.00308395	0.139536	165930
syntaxin binding	molecular_function	6.34	8	0.00214624	0.00541638	0.00327014	0.0845541	161397
protein C-terminus binding	molecular_function	37.44	29.62	0.0126743	0.0200542	0.00737982	0.0775316	143065
brush border membrane	cellular_component	3.13	5	0.00105958	0.00338524	0.00232566	0.126646	131200
extrinsic to internal side of plasma membrane	cellular_component	3.56	5	0.00120515	0.00338524	0.00218009	0.126646	51103.1
glucose homeostasis	biological_process	7.84	9.62	0.00265403	0.0065132	0.00385917	0.0754127	47732.4
embryonic placenta development	biological_process	4.04	5	0.00136764	0.00338524	0.0020176	0.170521	40665.5
calcium-dependent protein binding	molecular_function	7.81	8	0.00264387	0.00541638	0.00277251	0.185136	25262.3
cholesterol metabolic process	biological_process	11.26	11	0.00381178	0.00744753	0.00363575	0.112948	24300.6
response to hydrogen peroxide	biological_process	5.38	6	0.00182126	0.00406229	0.00224103	0.231142	22950.2
cytoskeletal protein binding	molecular_function	10.13	10.56	0.00342925	0.00714963	0.00372038	0.107016	20608.9
receptor tyrosine kinase binding	molecular_function	7.55	8	0.00255586	0.00541638	0.00286053	0.185136	14726.1
RNA polymerase II repressing transcription factor binding	molecular_function	4.13	5	0.0013981	0.00338524	0.00198714	0.170521	14075.3
cellular protein localization	biological_process	6.73	8	0.00227827	0.00541638	0.00313812	0.107131	13220
sensory perception of sound	biological_process	7.47	9	0.00252877	0.00609343	0.00356466	0.0632298	12438.7
retrograde transport, endosome to Golgi	biological_process	5.74	6	0.00194313	0.00406229	0.00211916	0.231142	12045.9
protein binding, bridging	molecular_function	6.5	7	0.00220041	0.00473934	0.00253893	0.197804	11006
protein K48-linked ubiquitination	biological_process	9.44	9	0.00319567	0.00609343	0.00289777	0.139536	10051.8
ATPase binding	molecular_function	5.57	6	0.00188558	0.00406229	0.00217671	0.231142	8342.73
chromatin modification	biological_process	50.14	38	0.0169736	0.0257278	0.00875423	0.0522859	8276.23
negative regulation of protein phosphorylation	biological_process	8	8	0.00270819	0.00541638	0.00270819	0.185136	7783.55
regulation of protein localization	biological_process	6.14	7	0.00207854	0.00473934	0.0026608	0.141546	6407.32
embryonic skeletal system morphogenesis	biological_process	4.24	6	0.00143534	0.00406229	0.00262695	0.0935857	6347.8
brain development	biological_process	11.78	11	0.00398781	0.00744753	0.00345972	0.181551	5199.52
Golgi organization	biological_process	7.94	9	0.00268788	0.00609343	0.00340555	0.118942	4389.44
sphingolipid metabolic process	biological_process	4.01	5	0.00135748	0.00338524	0.00202776	0.170521	3954.84
negative regulation of catalytic activity	biological_process	12.75	11	0.00431618	0.00744753	0.00313135	0.198291	3298.67
positive regulation of phosphatidylinositol 3-kinase cascade	biological_process	5.29	6	0.00179079	0.00406229	0.0022715	0.196698	3107.07
growth cone	cellular_component	12.42	12	0.00420447	0.00812458	0.00392011	0.0867782	2850.98
vesicle-mediated transport	biological_process	53	35	0.0179418	0.0236967	0.00575491	0.209304	1669.93
symporter activity	molecular_function	5.9	7	0.00199729	0.00473934	0.00274204	0.141546	1344.78
synapse	cellular_component	39.35	30	0.0133209	0.0203114	0.00699052	0.0933367	1339.21
Rho guanyl-nucleotide exchange factor activity	molecular_function	8.27	8	0.00279959	0.00541638	0.00261679	0.185136	1105.1
dendritic shaft	cellular_component	4.7	6	0.00159106	0.00406229	0.00247123	0.196698	964.465
regulation of cell shape	biological_process	13.55	12	0.004587	0.00812458	0.00353758	0.136934	946.051
negative regulation of smooth muscle cell proliferation	biological_process	5.14	6	0.00174001	0.00406229	0.00232227	0.196698	772.742
regulation of cell proliferation	biological_process	24.69	19	0.00835816	0.0128639	0.00450575	0.197708	723.48
endosome to lysosome transport	biological_process	7.2	7	0.00243737	0.00473934	0.00230196	0.254063	678.292
protein ubiquitination	biological_process	40.55	28	0.0137271	0.0189573	0.0052302	0.200145	552.665
ruffle membrane	cellular_component	5.98	7	0.00202437	0.00473934	0.00271496	0.141546	464.258
GTPase activity	molecular_function	41.7	29	0.0141165	0.0196344	0.00551794	0.203934	299.843
negative regulation of sequence-specific DNA binding transcription factor activity	biological_process	10.68	10	0.00361544	0.00677048	0.00315504	0.170023	292.104
RNA polymerase II activating transcription factor binding	molecular_function	5.3	6	0.00179418	0.00406229	0.00226811	0.196698	235.099
locomotory behavior	biological_process	7.45	7	0.002522	0.00473934	0.00221733	0.254063	158.87
cell migration	biological_process	20.75	17	0.00702437	0.0115098	0.00448544	0.165682	131.359
clathrin-coated vesicle	cellular_component	6.48	7	0.00219364	0.00473934	0.0025457	0.254063	130.37
positive regulation of peptidyl-tyrosine phosphorylation	biological_process	7.9	8	0.00267434	0.00541638	0.00274204	0.185136	97.3884
negative regulation of gene expression	biological_process	16.37	14	0.00554164	0.00947867	0.00393703	0.124034	89.5499
elevation of cytosolic calcium ion concentration	biological_process	5.99	7	0.00202776	0.00473934	0.00271158	0.141546	87.6785
tight junction	cellular_component	10.44	11	0.00353419	0.00744753	0.00391334	0.101084	86.9264
filopodium	cellular_component	6.64	7	0.0022478	0.00473934	0.00249154	0.254063	75.6992
embryonic digit morphogenesis	biological_process	6.78	7	0.00229519	0.00473934	0.00244414	0.254063	65.6764
response to calcium ion	biological_process	7.77	7	0.00263033	0.00473934	0.002109	0.281681	57.02
metal ion binding	molecular_function	483.61	265.62	0.163714	0.179838	0.0161239	0.173917	42.5397
protein kinase C binding	molecular_function	11.23	10	0.00380162	0.00677048	0.00296886	0.170023	42.2403
PML body	cellular_component	10.91	11	0.0036933	0.00744753	0.00375423	0.112948	39.9328
peptidyl-tyrosine dephosphorylation	biological_process	6.88	7	0.00232905	0.00473934	0.00241029	0.254063	38.1009
G-protein coupled receptor signaling pathway	biological_process	14.95	13	0.00506093	0.00880162	0.00374069	0.159796	38.0044
phosphatidylinositol binding	molecular_function	11.43	11	0.00386933	0.00744753	0.0035782	0.112948	37.4726
kinetochore	cellular_component	15.38	13	0.0052065	0.00880162	0.00359513	0.197222	36.6165
organ morphogenesis	biological_process	10.94	10	0.00370345	0.00677048	0.00306703	0.170023	25.8172
basement membrane	cellular_component	11.51	11	0.00389641	0.00744753	0.00355112	0.112948	19.6029
heterotrimeric G-protein complex	cellular_component	3.29	5	0.00111374	0.00338524	0.0022715	0.126646	17.6403
mRNA polyadenylation	biological_process	4.86	5	0.00164523	0.00338524	0.00174001	0.316681	13.8927
negative regulation of osteoblast differentiation	biological_process	5.07	6	0.00171632	0.00406229	0.00234597	0.196698	12.1524
cadherin binding	molecular_function	3.95	5	0.00133717	0.00338524	0.00204807	0.170521	11.5673
protein phosphatase binding	molecular_function	11.24	10	0.00380501	0.00677048	0.00296547	0.214097	11.1436
calcium ion transport	biological_process	11.49	11	0.00388964	0.00744753	0.00355789	0.112948	10.0268
negative regulation of cell differentiation	biological_process	3.88	5	0.00131347	0.00338524	0.00207177	0.170521	9.41035
positive regulation of DNA binding	biological_process	5.16	6	0.00174678	0.00406229	0.0023155	0.196698	9.32091
neuromuscular process controlling balance	biological_process	4.45	5	0.00150643	0.00338524	0.00187881	0.170521	8.63328
sequence-specific DNA binding RNA polymerase II transcription factor activity	molecular_function	4.97	6	0.00168246	0.00406229	0.00237982	0.196698	6.80766
negative regulation of cell growth	biological_process	20.78	16	0.00703453	0.0108328	0.00379824	0.220923	5.48487
positive regulation of mesenchymal cell proliferation	biological_process	4.78	6	0.00161814	0.00406229	0.00244414	0.196698	5.43641
transferase activity	molecular_function	235.98	133.62	0.0798849	0.0904672	0.0105823	0.250417	5.07706
anterior/posterior pattern specification	biological_process	11.19	11	0.00378808	0.00744753	0.00365944	0.112948	4.54277
neuromuscular junction development	biological_process	5.19	5	0.00175694	0.00338524	0.0016283	0.316681	4.51351
cytoplasmic stress granule	cellular_component	8.4	8	0.0028436	0.00541638	0.00257278	0.185136	3.69338
regulation of sequence-specific DNA binding transcription factor activity	biological_process	5.44	6	0.00184157	0.00406229	0.00222072	0.196698	3.31072
androgen receptor signaling pathway	biological_process	5.7	6	0.00192959	0.00406229	0.0021327	0.231142	3.17423
regulation of translation	biological_process	25.23	18	0.00854096	0.0121869	0.0036459	0.255842	3.05085
cell division	biological_process	62.14	42	0.0210359	0.028436	0.00740014	0.112836	3.00792
odontogenesis of dentin-containing tooth	biological_process	5.35	6	0.0018111	0.00406229	0.00225118	0.21392	2.54602
positive regulation of JUN kinase activity	biological_process	4.26	6	0.00144211	0.00406229	0.00262018	0.0935857	2.461
positive regulation of proteolysis	biological_process	5.5	6	0.00186188	0.00406229	0.00220041	0.231142	2.12868
lipid particle	cellular_component	9.17	8	0.00310427	0.00541638	0.00231212	0.301365	1.79868
response to hypoxia	biological_process	16.76	14	0.00567366	0.00947867	0.00380501	0.181414	1.70249
regulation of ion transmembrane transport	biological_process	6.17	6	0.00208869	0.00406229	0.0019736	0.231142	1.60413
Ran GTPase binding	molecular_function	6.65	7	0.00225118	0.00473934	0.00248815	0.254063	1.56713
cell leading edge	cellular_component	8.18	7	0.00276913	0.00473934	0.00197021	0.281681	1.25895
mitosis	biological_process	43.48	30	0.014719	0.0203114	0.00559242	0.213242	1.22194
chromosome	cellular_component	47.37	32	0.0160359	0.0216655	0.00562965	0.185604	0.900325
palate development	biological_process	8.76	8	0.00296547	0.00541638	0.00245091	0.301365	0.888534
pattern specification process	biological_process	7.93	7	0.0026845	0.00473934	0.00205484	0.281681	0.875546
histone-lysine N-methyltransferase activity	molecular_function	5.38	5	0.00182126	0.00338524	0.00156398	0.419639	0.648286
negative regulation of angiogenesis	biological_process	6.04	6	0.00204469	0.00406229	0.0020176	0.231142	0.646767
transcription coactivator activity	molecular_function	33.33	24	0.011283	0.0162492	0.00496615	0.159667	0.640724
histone binding	molecular_function	11.29	10	0.00382194	0.00677048	0.00294854	0.170023	0.62681
dendrite	cellular_component	32.9	23	0.0111374	0.0155721	0.00443466	0.253306	0.61228
single-stranded DNA binding	molecular_function	12.18	11	0.00412322	0.00744753	0.00332431	0.181551	0.538759
nucleotide binding	molecular_function	366.33	205.62	0.124012	0.139215	0.0152031	0.154593	0.435032
intracellular membrane-bounded organelle	cellular_component	93.4	58	0.0316181	0.0392688	0.00765064	0.18789	0.420181
endocytosis	biological_process	30.13	21	0.0101997	0.014218	0.00401828	0.234842	0.415944
phosphatase activity	molecular_function	18.65	14	0.00631347	0.00947867	0.0031652	0.264212	0.379118
heart development	biological_process	27.16	20	0.00919431	0.013541	0.00434665	0.216851	0.307264
tissue development	biological_process	4.75	5	0.00160799	0.00338524	0.00177725	0.316681	0.245438
regulation of growth	biological_process	12.73	10	0.00430941	0.00677048	0.00246107	0.374683	0.214612
thymus development	biological_process	4.58	5	0.00155044	0.00338524	0.0018348	0.316681	0.196534
rhythmic process	biological_process	5.8	6	0.00196344	0.00406229	0.00209885	0.231142	0.190721
lactation	biological_process	4.76	5	0.00161137	0.00338524	0.00177387	0.316681	0.189199
response to estradiol stimulus	biological_process	4.49	5	0.00151997	0.00338524	0.00186527	0.243601	0.186228
cell proliferation	biological_process	32	22	0.0108328	0.0148951	0.00406229	0.247971	0.185713
potassium ion transport	biological_process	5.92	6	0.00200406	0.00406229	0.00205823	0.231142	0.179724
SNARE complex	cellular_component	6.79	6	0.00229858	0.00406229	0.00176371	0.379386	0.159751
keratinocyte differentiation	biological_process	4.68	5	0.00158429	0.00338524	0.00180095	0.243601	0.159005
intracellular	cellular_component	146.4	84.56	0.0495599	0.0572512	0.00769127	0.316322	0.156915
double-stranded RNA binding	molecular_function	5.47	5	0.00185173	0.00338524	0.00153351	0.522596	0.155334
phosphoprotein binding	molecular_function	8.99	8	0.00304333	0.00541638	0.00237305	0.301365	0.154265
GTPase activator activity	molecular_function	23.23	17	0.00786391	0.0115098	0.0036459	0.238919	0.152668
microtubule motor activity	molecular_function	6.77	6	0.00229181	0.00406229	0.00177048	0.379386	0.151898
positive regulation of catalytic activity	biological_process	8.97	8	0.00303656	0.00541638	0.00237982	0.301365	0.151705
blood vessel development	biological_process	8.58	8	0.00290454	0.00541638	0.00251185	0.185136	0.143336
negative regulation of neuron apoptotic process	biological_process	17.12	14	0.00579553	0.00947867	0.00368314	0.181414	0.142951
growth factor binding	molecular_function	6.82	6	0.00230873	0.00406229	0.00175355	0.379386	0.142161
axonogenesis	biological_process	13.86	11	0.00469194	0.00744753	0.00275559	0.288625	0.14028
peptidyl-tyrosine phosphorylation	biological_process	7.77	7	0.00263033	0.00473934	0.002109	0.281681	0.137745
protein oligomerization	biological_process	7.77	7.62	0.00263033	0.00515911	0.00252877	0.254063	0.134003
post-embryonic development	biological_process	14.32	11	0.00484766	0.00744753	0.00259986	0.288625	0.13233
Golgi membrane	cellular_component	19.08	14	0.00645904	0.00947867	0.00301963	0.270443	0.12647
platelet-derived growth factor receptor signaling pathway	biological_process	6.47	6	0.00219025	0.00406229	0.00187204	0.231142	0.124708
postsynaptic membrane	cellular_component	15.63	12	0.00529113	0.00812458	0.00283345	0.224351	0.114086
chaperone binding	molecular_function	12.99	10	0.00439743	0.00677048	0.00237305	0.374683	0.107719
identical protein binding	molecular_function	73.87	46.07	0.0250068	0.0311916	0.00618483	0.241212	0.102226
skeletal system development	biological_process	9.88	9	0.00334462	0.00609343	0.00274882	0.223873	0.100498
ATP binding	molecular_function	265.9	143.62	0.0900135	0.0972376	0.0072241	0.44186	0.0966837
carbohydrate metabolic process	biological_process	29.81	20.45	0.0100914	0.0138456	0.00375423	0.28678	0.0893194
Ras protein signal transduction	biological_process	5.03	5	0.00170278	0.00338524	0.00168246	0.316681	0.086774
positive regulation of endothelial cell proliferation	biological_process	4.71	5	0.00159445	0.00338524	0.00179079	0.316681	0.0848798
branching morphogenesis of an epithelial tube	biological_process	4.92	5	0.00166554	0.00338524	0.0017197	0.316681	0.0829978
centrosome	cellular_component	66.07	39	0.0223663	0.0264049	0.00403859	0.434597	0.0826263
motor activity	molecular_function	9.07	7	0.00307041	0.00473934	0.00166892	0.427722	0.0815138
cell projection	cellular_component	63.58	39	0.0215234	0.0264049	0.00488152	0.3416	0.0809283
microvillus	cellular_component	6.25	6	0.00211578	0.00406229	0.00194651	0.231142	0.0751316
regulation of Rho protein signal transduction	biological_process	8.62	7	0.00291808	0.00473934	0.00182126	0.427722	0.0747716
multicellular organism growth	biological_process	11.49	9	0.00388964	0.00609343	0.00220379	0.340981	0.0693488
lung development	biological_process	12.83	10	0.00434326	0.00677048	0.00242722	0.374683	0.0641925
protein heterodimerization activity	molecular_function	63.05	39	0.0213439	0.0264049	0.00506093	0.289479	0.0641086
ossification	biological_process	7.14	7	0.00241706	0.00473934	0.00232227	0.254063	0.0638889
ER-associated protein catabolic process	biological_process	8.52	7	0.00288422	0.00473934	0.00185511	0.281681	0.0615354
oxidoreductase activity, acting on the CH-OH group of donors, NAD or NADP as acceptor	molecular_function	8.8	7.45	0.00297901	0.00504401	0.002065	0.301365	0.0614071
JNK cascade	biological_process	5.12	5	0.00173324	0.00338524	0.001652	0.316681	0.0595685
negative regulation of signal transduction	biological_process	5.52	5	0.00186865	0.00338524	0.00151659	0.419639	0.0524016
sodium ion transport	biological_process	7	6	0.00236967	0.00406229	0.00169262	0.379386	0.0501728
response to cytokine stimulus	biological_process	5.72	5	0.00193636	0.00338524	0.00144888	0.522596	0.0481597
exocytosis	biological_process	9.37	8	0.00317197	0.00541638	0.00224441	0.301365	0.0462129
receptor-mediated endocytosis	biological_process	5.82	5	0.00197021	0.00338524	0.00141503	0.522596	0.0446514
cell cycle	biological_process	111.9	65	0.0378808	0.0440081	0.00612729	0.329764	0.0434455
receptor binding	molecular_function	40.16	25	0.0135951	0.0169262	0.00333108	0.388423	0.0425821
activation of cysteine-type endopeptidase activity involved in apoptotic process	biological_process	11.92	9	0.00403521	0.00609343	0.00205823	0.359986	0.0411174
coated pit	cellular_component	12.98	10	0.00439404	0.00677048	0.00237644	0.374683	0.0408428
protein complex assembly	biological_process	10.44	8	0.00353419	0.00541638	0.00188219	0.324039	0.0373129
cellular response to lipopolysaccharide	biological_process	5.57	5	0.00188558	0.00338524	0.00149966	0.522596	0.0369275
microtubule cytoskeleton	cellular_component	25.64	17	0.00867976	0.0115098	0.00283006	0.327219	0.0366494
regulation of cell cycle	biological_process	19.33	13	0.00654367	0.00880162	0.00225796	0.462466	0.0355645
multicellular organismal development	biological_process	96.16	55	0.0325525	0.0372376	0.00468517	0.42956	0.0351755
cytoplasmic membrane-bounded vesicle	cellular_component	11.76	9	0.00398104	0.00609343	0.00211239	0.359986	0.0345959
transport	biological_process	297	158	0.100542	0.106974	0.00643196	0.529499	0.034078
positive regulation of osteoblast differentiation	biological_process	7.82	7	0.00264726	0.00473934	0.00209208	0.281681	0.0337021
anchored to membrane	cellular_component	5.23	5	0.00177048	0.00338524	0.00161476	0.316681	0.0333744
skeletal muscle cell differentiation	biological_process	7.98	7	0.00270142	0.00473934	0.00203791	0.281681	0.0331108
positive regulation of neuron projection development	biological_process	11.8	9	0.00399458	0.00609343	0.00209885	0.359986	0.0315206
positive regulation of transforming growth factor beta receptor signaling pathway	biological_process	5.47	5	0.00185173	0.00338524	0.00153351	0.316681	0.0309887
axon	cellular_component	28.81	19	0.00975288	0.0128639	0.00311104	0.358684	0.0289204
positive regulation of cysteine-type endopeptidase activity involved in apoptotic process	biological_process	5.58	5	0.00188896	0.00338524	0.00149628	0.522596	0.0274218
recycling endosome	cellular_component	6.9	6	0.00233582	0.00406229	0.00172647	0.379386	0.0268442
positive regulation of protein catabolic process	biological_process	8.06	7	0.0027285	0.00473934	0.00201083	0.281681	0.0261415
histone H3 acetylation	biological_process	6.65	6	0.00225118	0.00406229	0.0018111	0.379386	0.0259378
ligase activity	molecular_function	86.22	49	0.0291875	0.0331754	0.00398781	0.459327	0.0255219
lipid metabolic process	biological_process	66.1	38	0.0223764	0.0257278	0.00335139	0.527759	0.025026
endoplasmic reticulum membrane	cellular_component	28.01	18	0.00948206	0.0121869	0.00270481	0.432667	0.0249673
Notch signaling pathway	biological_process	8.99	7	0.00304333	0.00473934	0.00169601	0.427722	0.0239934
negative regulation of MAP kinase activity	biological_process	6.49	5	0.00219702	0.00338524	0.00118822	0.549135	0.0238483
protein monoubiquitination	biological_process	6.05	5	0.00204807	0.00338524	0.00133717	0.522596	0.0235891
integrin binding	molecular_function	14.11	10	0.00477657	0.00677048	0.00199391	0.390895	0.0232103
metallopeptidase activity	molecular_function	15.92	11	0.0053893	0.00744753	0.00205823	0.417794	0.0226488
cellular process	biological_process	7.29	6	0.00246784	0.00406229	0.00159445	0.379386	0.0223861
actin filament	cellular_component	5.84	5	0.00197698	0.00338524	0.00140826	0.522596	0.0215954
ubiquitin binding	molecular_function	11	8	0.00372376	0.00541638	0.00169262	0.466355	0.0198527
neuron migration	biological_process	12.5	9	0.00423155	0.00609343	0.00186188	0.359986	0.0197057
transport vesicle	cellular_component	6.05	5	0.00204807	0.00338524	0.00133717	0.522596	0.0193786
ubiquitin ligase complex	cellular_component	10.51	8	0.00355789	0.00541638	0.0018585	0.324039	0.0184721
positive regulation of neuron apoptotic process	biological_process	9.08	7	0.0030738	0.00473934	0.00166554	0.427722	0.0184428
integral to endoplasmic reticulum membrane	cellular_component	11.13	8	0.00376777	0.00541638	0.00164861	0.466355	0.0181393
dendritic spine	cellular_component	10.07	8	0.00340894	0.00541638	0.00200745	0.324039	0.0178633
positive regulation of ERK1 and ERK2 cascade	biological_process	9.1	7	0.00308057	0.00473934	0.00165877	0.427722	0.0174611
neuron projection morphogenesis	biological_process	5.7	5	0.00192959	0.00338524	0.00145565	0.522596	0.0169175
face morphogenesis	biological_process	5.65	5	0.00191266	0.00338524	0.00147258	0.522596	0.0168443
response to UV	biological_process	9.02	7	0.00305349	0.00473934	0.00168585	0.427722	0.0166503
positive regulation of translation	biological_process	9.31	7	0.00315166	0.00473934	0.00158768	0.427722	0.0163856
regulation of apoptotic process	biological_process	28.44	18	0.00962762	0.0121869	0.00255924	0.432667	0.0162158
wound healing	biological_process	7.88	6	0.00266757	0.00406229	0.00139472	0.57078	0.0160804
nuclear-transcribed mRNA catabolic process, nonsense-mediated decay	biological_process	7.35	6	0.00248815	0.00406229	0.00157414	0.379386	0.0159182
chromosome segregation	biological_process	12.68	9	0.00429248	0.00609343	0.00180095	0.42905	0.0157743
protein N-terminus binding	molecular_function	24.59	16	0.00832431	0.0108328	0.00250846	0.453097	0.0155853
transporter activity	molecular_function	11.27	8	0.00381517	0.00541638	0.00160122	0.466355	0.0155498
late endosome	cellular_component	17.85	12	0.00604265	0.00812458	0.00208192	0.441455	0.0153851
transcription from RNA polymerase II promoter	biological_process	23.67	15	0.00801286	0.0101557	0.00214286	0.498239	0.0142527
nuclear envelope	cellular_component	17.07	11	0.00577861	0.00744753	0.00166892	0.547634	0.014161
apical part of cell	cellular_component	14.6	10	0.00494245	0.00677048	0.00182803	0.524804	0.0135404
ubiquitin-dependent protein catabolic process	biological_process	36.35	22	0.0123053	0.0148951	0.00258971	0.531135	0.0126021
response to oxidative stress	biological_process	26.14	16	0.00884902	0.0108328	0.00198375	0.513635	0.012189
transferase activity, transferring acyl groups	molecular_function	25.83	16	0.00874408	0.0108328	0.00208869	0.513635	0.0121432
phospholipid binding	molecular_function	38.05	22	0.0128808	0.0148951	0.00201422	0.58319	0.0118026
steroid metabolic process	biological_process	10.91	8	0.0036933	0.00541638	0.00172309	0.466355	0.0116701
chromatin	cellular_component	18.66	12	0.00631686	0.00812458	0.00180772	0.567449	0.0113497
dephosphorylation	biological_process	27.65	17	0.00936019	0.0115098	0.00214963	0.527689	0.0109068
endoplasmic reticulum unfolded protein response	biological_process	6.25	5	0.00211578	0.00338524	0.00126947	0.522596	0.0107403
heterochromatin	cellular_component	6.69	5	0.00226473	0.00338524	0.00112051	0.549135	0.0104223
G-protein coupled receptor activity	molecular_function	5.97	5	0.00202099	0.00338524	0.00136425	0.522596	0.0101402
intracellular signal transduction	biological_process	33.57	20	0.0113643	0.013541	0.00217671	0.557792	0.00992386
PcG protein complex	cellular_component	5.99	5	0.00202776	0.00338524	0.00135748	0.522596	0.00915633
receptor activity	molecular_function	13.58	9	0.00459716	0.00609343	0.00149628	0.657846	0.00894992
lysosome	cellular_component	48.73	27	0.0164963	0.0182803	0.00178402	0.62264	0.00854827
endocytic vesicle	cellular_component	6.95	5	0.00235274	0.00338524	0.0010325	0.549135	0.00853453
protein homodimerization activity	molecular_function	103.56	53	0.0350575	0.0358835	0.000825999	0.727575	0.00843514
positive regulation of protein ubiquitination	biological_process	9.63	7	0.00325999	0.00473934	0.00147935	0.606776	0.00831244
meiosis	biological_process	5.94	5	0.00201083	0.00338524	0.00137441	0.522596	0.00810511
positive regulation of NF-kappaB transcription factor activity	biological_process	11.64	8	0.00394042	0.00541638	0.00147596	0.63498	0.00779096
autophagic vacuole	cellular_component	6.6	5	0.00223426	0.00338524	0.00115098	0.522596	0.00768014
transcription initiation from RNA polymerase II promoter	biological_process	7.88	6	0.00266757	0.00406229	0.00139472	0.57078	0.00761864
nucleolus	cellular_component	103.86	54	0.0351591	0.0365606	0.00140149	0.79611	0.00754023
microtubule binding	molecular_function	22.96	14	0.00777251	0.00947867	0.00170616	0.6003	0.00750429
regulation of multicellular organism growth	biological_process	8.39	6	0.00284022	0.00406229	0.00122207	0.57078	0.00747891
T-tubule	cellular_component	6.62	5	0.00224103	0.00338524	0.00114421	0.549135	0.00743802
sarcoplasmic reticulum	cellular_component	10.29	7	0.00348341	0.00473934	0.00125592	0.606776	0.00708234
intracellular protein kinase cascade	biological_process	17.5	11	0.00592417	0.00744753	0.00152336	0.620325	0.00694353
positive regulation of I-kappaB kinase/NF-kappaB cascade	biological_process	20.87	13	0.007065	0.00880162	0.00173663	0.462466	0.00679231
phospholipid biosynthetic process	biological_process	10.81	7	0.00365944	0.00473934	0.00107989	0.621916	0.00665391
positive regulation of MAP kinase activity	biological_process	6.74	5	0.00228165	0.00338524	0.00110359	0.549135	0.00647142
postsynaptic density	cellular_component	15.64	10	0.00529452	0.00677048	0.00147596	0.524804	0.00614651
positive regulation of protein kinase activity	biological_process	6.72	5	0.00227488	0.00338524	0.00111036	0.549135	0.00581965
Rab GTPase binding	molecular_function	8.63	6	0.00292146	0.00406229	0.00114083	0.590307	0.00544738
erythrocyte differentiation	biological_process	6.91	5	0.0023392	0.00338524	0.00104604	0.549135	0.00536187
cell communication	biological_process	10.56	7	0.00357481	0.00473934	0.00116452	0.614346	0.00524211
innate immune response	biological_process	14.67	9	0.00496615	0.00609343	0.00112729	0.667925	0.00522015
protein transporter activity	molecular_function	14.58	9	0.00493568	0.00609343	0.00115775	0.662886	0.00497921
protein disulfide oxidoreductase activity	molecular_function	7.04	5	0.00238321	0.00338524	0.00100203	0.549135	0.0049403
PDZ domain binding	molecular_function	14.39	9	0.00487136	0.00609343	0.00122207	0.667925	0.00490336
carbohydrate binding	molecular_function	16.33	9.62	0.0055281	0.0065132	0.000985105	0.685387	0.00485251
mitochondrial outer membrane	cellular_component	32.49	18	0.0109986	0.0121869	0.00118822	0.763044	0.00483418
nuclear membrane	cellular_component	21.94	12	0.00742722	0.00812458	0.00069736	0.713328	0.00480415
midbody	cellular_component	20.52	12	0.00694651	0.00812458	0.00117806	0.706943	0.00471044
positive regulation of apoptotic process	biological_process	49.6	25.45	0.0167908	0.0172309	0.000440081	0.80564	0.00466799
iron ion binding	molecular_function	15.21	9	0.00514895	0.00609343	0.000944482	0.667925	0.00444444
stem cell maintenance	biological_process	10.97	7	0.00371361	0.00473934	0.00102573	0.621916	0.00428553
RNA polymerase II transcription factor binding	molecular_function	7.41	5	0.00250846	0.00338524	0.000876777	0.770074	0.00421924
lysosomal membrane	cellular_component	9.57	6	0.00323968	0.00406229	0.000822613	0.622227	0.00418869
protein localization	biological_process	13.28	8	0.0044956	0.00541638	0.000920785	0.647163	0.00416061
lipid binding	molecular_function	33.13	17	0.0112153	0.0115098	0.000294516	0.759633	0.00405813
mRNA transport	biological_process	17.61	10	0.00596141	0.00677048	0.000809072	0.779176	0.00402178
proteasomal ubiquitin-dependent protein catabolic process	biological_process	19.62	11	0.00664184	0.00744753	0.000805687	0.700339	0.00397198
proteinaceous extracellular matrix	cellular_component	21.43	11	0.00725457	0.00744753	0.000192959	0.848901	0.00397028
extracellular matrix	cellular_component	27.16	14	0.00919431	0.00947867	0.00028436	0.866568	0.0038667
unfolded protein binding	molecular_function	21.18	12	0.00716994	0.00812458	0.000954638	0.713328	0.00386618
regulation of catalytic activity	biological_process	20.03	11	0.00678064	0.00744753	0.000666892	0.848901	0.0038524
positive regulation of fibroblast proliferation	biological_process	7.4	5	0.00250508	0.00338524	0.000880162	0.549135	0.00383192
cellular calcium ion homeostasis	biological_process	9.44	6	0.00319567	0.00406229	0.000866622	0.590307	0.00382564
negative regulation of cell death	biological_process	7.32	5	0.002478	0.00338524	0.000907244	0.549135	0.00363766
smoothened signaling pathway	biological_process	7.46	5	0.00252539	0.00338524	0.000859851	0.549135	0.00362966
response to stress	biological_process	27.81	14	0.00941435	0.00947867	6.43196e-05	0.874017	0.00354548
nucleosome assembly	biological_process	11.94	7	0.00404198	0.00473934	0.00069736	0.808375	0.00346781
thyroid hormone receptor binding	molecular_function	7.6	5	0.00257278	0.00338524	0.000812458	0.770074	0.00336186
ligand-dependent nuclear receptor transcription coactivator activity	molecular_function	7.96	5	0.00269465	0.00338524	0.000690589	0.770074	0.00330231
protein glycosylation	biological_process	7.76	5	0.00262695	0.00338524	0.000758294	0.770074	0.00323936
aminopeptidase activity	molecular_function	7.55	5	0.00255586	0.00338524	0.000829384	0.770074	0.00321086
muscle organ development	biological_process	8.96	5.56	0.00303318	0.00376439	0.000731212	0.791835	0.00302201
magnesium ion binding	molecular_function	31.97	16	0.0108226	0.0108328	1.01557e-05	0.881488	0.00301643
protein tyrosine kinase activity	molecular_function	18.96	10	0.00641842	0.00677048	0.000352065	0.841224	0.00298158
nuclear matrix	cellular_component	17	9	0.00575491	0.00609343	0.000338524	0.83223	0.00293626
heart morphogenesis	biological_process	8.09	5	0.00273866	0.00338524	0.000646581	0.770074	0.00289869
cytoplasmic microtubule	cellular_component	8.44	5	0.00285714	0.00338524	0.000528097	0.770074	0.00286099
ion transmembrane transport	biological_process	14.04	8	0.00475288	0.00541638	0.000663507	0.821495	0.00284793
negative regulation of protein kinase activity	biological_process	13.91	7	0.00470887	0.00473934	3.04672e-05	0.828875	0.00280086
axon guidance	biological_process	11.99	7	0.0040589	0.00473934	0.000680433	0.808375	0.00279027
heparin binding	molecular_function	11.46	7	0.00387949	0.00473934	0.000859851	0.808375	0.00277701
liver development	biological_process	12.4	7	0.0041977	0.00473934	0.000541638	0.808375	0.00268749
negative regulation of epithelial cell proliferation	biological_process	8.05	5	0.00272512	0.00338524	0.000660122	0.770074	0.00263769
mRNA binding	molecular_function	15.29	8	0.00517603	0.00541638	0.000240352	0.838398	0.00260726
cell death	biological_process	11.13	6	0.00376777	0.00406229	0.000294516	0.817438	0.00256888
positive regulation of sequence-specific DNA binding transcription factor activity	biological_process	12.34	7	0.00417739	0.00473934	0.00056195	0.808375	0.00255468
acid-amino acid ligase activity	molecular_function	12.37	7	0.00418754	0.00473934	0.000551794	0.808375	0.00254771
cell redox homeostasis	biological_process	15.96	8.45	0.00540284	0.00572106	0.000318213	0.838407	0.00250432
immune response	biological_process	8.7	5	0.00294516	0.00338524	0.000440081	0.803344	0.00248063
nucleocytoplasmic transport	biological_process	8.09	5	0.00273866	0.00338524	0.000646581	0.770074	0.00243146
MAPK cascade	biological_process	12.89	7	0.00436357	0.00473934	0.000375762	0.828884	0.00235121
negative regulation of cysteine-type endopeptidase activity involved in apoptotic process	biological_process	14.89	8	0.00504062	0.00541638	0.000375762	0.838407	0.00234272
positive regulation of angiogenesis	biological_process	8.69	5	0.00294177	0.00338524	0.000443466	0.770074	0.00230201
cilium assembly	biological_process	9.24	5	0.00312796	0.00338524	0.000257278	0.803355	0.00223642
manganese ion binding	molecular_function	8.42	5	0.00285037	0.00338524	0.000534868	0.786703	0.00221284
skeletal muscle tissue development	biological_process	10.03	6	0.0033954	0.00406229	0.000666892	0.791835	0.00220998
neuron differentiation	biological_process	10.83	6	0.00366622	0.00406229	0.000396073	0.817459	0.00218062
protein homotetramerization	biological_process	13.2	6.62	0.00446852	0.00448206	1.3541e-05	1	0.00210002
response to organic substance	biological_process	8.8	5	0.00297901	0.00338524	0.000406229	0.803344	0.00205749
oxidoreductase activity, acting on single donors with incorporation of molecular oxygen, incorporation of two atoms of oxygen	molecular_function	9.83	5	0.00332769	0.00338524	5.75491e-05	1	0.0017461
